# Supplementary material for: Dissecting the phase separation and oligomerization activities of the carboxysome positioning protein McdB
Source: eLife. 2023 Sep 5;12:e81362. doi: 10.7554/eLife.81362 (PMC10554743; doi:10.7554/eLife.81362)
Supplement: Figure 1—source data 1. — Bands A, B, and C as well as the full-length McdB are labeled. [file elife-81362-fig1-data1.zip]

Archive with 2 entries (2 files):
- Figure 1-source data 1.tif
- Figure 1-source data 1-labeled.pdf
