# Supplementary material for: Dissecting the phase separation and oligomerization activities of the carboxysome positioning protein McdB
Source: eLife. 2023 Sep 5;12:e81362. doi: 10.7554/eLife.81362 (PMC10554743; doi:10.7554/eLife.81362)
Supplement: Figure 1—source data 2. [file elife-81362-fig1-data2.xlsx]

## Sheet: Sheet1
Wavelength	Buffer	20 °C initial RAW	20 °C initial calc	80 °C RAW	80 °C calc	20 °C return RAW	20 °C return calc
260	-0.84127	-0.705293	0.135977	-0.540496	0.300774	-0.590547	0.250723
259.5	-0.928717	-0.560647	0.36807	-0.605418	0.323299	-0.642323	0.286394
259	-0.962089	-0.671164	0.290925	-0.643837	0.318252	-0.731325	0.230764
258.5	-0.767444	-0.807525	-0.040081	-0.663039	0.104405	-0.705893	0.061551
258	-0.825052	-0.716228	0.108824	-0.701653	0.123399	-0.618914	0.206138
257.5	-0.774648	-0.661747	0.112901	-0.599444	0.175204	-0.595638	0.17901
257	-0.818203	-0.70244	0.115763	-0.700073	0.11813	-0.799559	0.018644
256.5	-0.904566	-0.717308	0.187258	-0.71581	0.188756	-0.761869	0.142697
256	-0.839947	-0.700512	0.139435	-0.765854	0.074093	-0.792298	0.047649
255.5	-0.846313	-0.788914	0.057399	-0.670855	0.175458	-0.812899	0.033414
255	-0.751854	-0.821872	-0.070018	-0.531912	0.219942	-0.776429	-0.024575
254.5	-0.686542	-0.857216	-0.170674	-0.686964	-0.000422	-0.700035	-0.013493
254	-0.800135	-0.827458	-0.027323	-0.658852	0.141283	-0.531195	0.26894
253.5	-0.911028	-0.704676	0.206352	-0.691163	0.219865	-0.624571	0.286457
253	-0.835294	-0.636807	0.198487	-0.59064	0.244654	-0.793549	0.041745
252.5	-0.861267	-0.845455	0.015812	-0.587112	0.274155	-0.702875	0.158392
252	-0.780607	-0.84481	-0.064203	-0.707407	0.0732	-0.766755	0.013852
251.5	-0.666633	-0.873657	-0.207024	-0.785156	-0.118523	-0.761705	-0.095072
251	-0.616319	-0.958303	-0.341984	-0.705488	-0.089169	-0.685282	-0.068963
250.5	-0.676411	-0.780631	-0.10422	-0.704578	-0.028167	-0.635117	0.041294
250	-0.754014	-0.834102	-0.080088	-0.674488	0.079526	-0.756974	-0.00296
249.5	-0.813419	-0.853004	-0.039585	-0.699586	0.113833	-0.726867	0.086552
249	-0.76809	-0.924424	-0.156334	-0.847593	-0.079503	-0.680357	0.087733
248.5	-1.0219	-0.867978	0.153922	-0.747483	0.274417	-0.764366	0.257534
248	-0.827114	-0.976584	-0.14947	-0.943184	-0.11607	-0.926713	-0.099599
247.5	-0.854686	-0.858862	-0.004176	-0.843747	0.010939	-0.988994	-0.134308
247	-0.797603	-0.792277	0.005326	-0.763687	0.033916	-1.04235	-0.244747
246.5	-0.675015	-1.03938	-0.364365	-0.889764	-0.214749	-1.03236	-0.357345
246	-0.672896	-1.16472	-0.491824	-1.14146	-0.468564	-1.03105	-0.358154
245.5	-0.626849	-1.1854	-0.558551	-1.03454	-0.407691	-1.12374	-0.496891
245	-0.718727	-1.47129	-0.752563	-1.05807	-0.339343	-1.17136	-0.452633
244.5	-0.891077	-1.34766	-0.456583	-1.16585	-0.274773	-1.01984	-0.128763
244	-0.785386	-1.31945	-0.534064	-1.49669	-0.711304	-1.12644	-0.341054
243.5	-0.585325	-1.4286	-0.843275	-1.44507	-0.859745	-1.2029	-0.617575
243	-0.813306	-1.56876	-0.755454	-1.48995	-0.676644	-1.34412	-0.530814
242.5	-0.75137	-1.72457	-0.9732	-1.62797	-0.8766	-1.44003	-0.68866
242	-0.664506	-1.77373	-1.10922	-1.71891	-1.0544	-1.62169	-0.957184
241.5	-0.919719	-1.8822	-0.962481	-1.74497	-0.825251	-1.89126	-0.971541
241	-0.813517	-1.98475	-1.17123	-1.88022	-1.0667	-1.91312	-1.0996
240.5	-0.746822	-2.16429	-1.41747	-2.11534	-1.36852	-1.82447	-1.07765
240	-0.828023	-2.46941	-1.64139	-2.34865	-1.52063	-2.02504	-1.19702
239.5	-0.865979	-2.73441	-1.86843	-2.46502	-1.59904	-2.30129	-1.43531
239	-0.808976	-3.07892	-2.26994	-2.65731	-1.84833	-2.59322	-1.78424
238.5	-0.673073	-3.22709	-2.55402	-2.74543	-2.07236	-2.79056	-2.11749
238	-0.715713	-3.53367	-2.81796	-2.97714	-2.26143	-3.27212	-2.55641
237.5	-0.775688	-3.78938	-3.01369	-3.33067	-2.55498	-3.62899	-2.8533
237	-0.795441	-3.86618	-3.07074	-3.51906	-2.72362	-4.01033	-3.21489
236.5	-0.655261	-4.38534	-3.73008	-3.75008	-3.09482	-4.29915	-3.64389
236	-0.803928	-4.60038	-3.79645	-4.04839	-3.24446	-4.43905	-3.63512
235.5	-0.848275	-5.0972	-4.24892	-4.20177	-3.35349	-4.94718	-4.09891
235	-0.770961	-5.59158	-4.82062	-4.72547	-3.95451	-5.36107	-4.59011
234.5	-0.646797	-6.00908	-5.36228	-4.97325	-4.32645	-5.86745	-5.22065
234	-0.662344	-6.57475	-5.91241	-5.12753	-4.46519	-6.3689	-5.70656
233.5	-0.686697	-6.88553	-6.19883	-5.43353	-4.74683	-6.67087	-5.98417
233	-0.774689	-7.4623	-6.68761	-5.68551	-4.91082	-7.43224	-6.65755
232.5	-1.02157	-8.10409	-7.08252	-5.98323	-4.96166	-8.02004	-6.99847
232	-0.970211	-8.45495	-7.48474	-6.15206	-5.18185	-8.45005	-7.47984
231.5	-0.845528	-9.15022	-8.30469	-6.4303	-5.58477	-8.95653	-8.111
231	-1.03433	-9.8967	-8.86237	-6.76091	-5.72658	-9.5326	-8.49827
230.5	-1.14421	-10.5026	-9.35839	-7.15566	-6.01145	-10.0042	-8.85999
230	-0.915241	-10.8901	-9.97486	-7.36145	-6.44621	-10.5269	-9.61166
229.5	-0.95451	-11.306	-10.3515	-8.00787	-7.05336	-11.2583	-10.3038
229	-1.01464	-11.9659	-10.9513	-8.20175	-7.18711	-11.6915	-10.6769
228.5	-0.998171	-12.4075	-11.4093	-8.51953	-7.52136	-12.4676	-11.4694
228	-0.961747	-12.8393	-11.8776	-8.84981	-7.88806	-12.7243	-11.7626
227.5	-1.05732	-13.271	-12.2137	-8.87803	-7.82071	-13.2907	-12.2334
227	-0.957803	-13.7088	-12.751	-9.06939	-8.11159	-13.8711	-12.9133
226.5	-1.14375	-14.0762	-12.9324	-9.42277	-8.27902	-14.2311	-13.0873
226	-0.944927	-14.3444	-13.3995	-9.72461	-8.77968	-14.4494	-13.5045
225.5	-0.847442	-14.6084	-13.761	-9.83899	-8.99155	-15.0558	-14.2084
225	-1.12615	-15.3333	-14.2071	-10.0504	-8.92425	-15.3194	-14.1932
224.5	-1.17054	-15.5009	-14.3304	-10.0161	-8.84556	-15.2958	-14.1253
224	-0.963928	-15.7006	-14.7367	-9.94779	-8.98386	-15.7166	-14.7527
223.5	-0.98742	-15.795	-14.8076	-10.2346	-9.24718	-16.0032	-15.0158
223	-0.903947	-15.9987	-15.0948	-10.5356	-9.63165	-16.1018	-15.1979
222.5	-1.00971	-16.4529	-15.4432	-10.5487	-9.53899	-16.2366	-15.2269
