# Supplementary material for: Dissecting the phase separation and oligomerization activities of the carboxysome positioning protein McdB
Source: eLife. 2023 Sep 5;12:e81362. doi: 10.7554/eLife.81362 (PMC10554743; doi:10.7554/eLife.81362)
Supplement: Figure 2—figure supplement 1—source data 3. [file elife-81362-fig2-figsupp1-data3.xlsx]

## Sheet: Sheet1
vol (mL)	ccctd	ctd	ntd	ntdcc	His-Sumo + McdB	cc
-2.02059	0	0	0	0	0	0
-2.01435	-1.19321	-68.4476	-11.9328	-2.92599	-76.3287	-4.13754
-2.00811	-1.70292	-98.4191	-17.6024	-4.25809	-111.605	-6.42111
-2.00187	-2.11785	-124.64	-22.6081	-5.46218	-142.698	-8.42061
-1.99562	-2.46161	-150.415	-27.7294	-6.69989	-173.379	-10.3847
-1.98938	-2.89183	-176.019	-32.8574	-7.96495	-203.611	-12.3899
-1.98314	-3.38065	-201.908	-37.971	-9.24656	-233.3	-14.3803
-1.9769	-3.92663	-227.953	-42.9655	-10.5442	-262.659	-16.4265
-1.97065	-4.42634	-250.236	-48.0732	-11.9182	-291.743	-18.4963
-1.96441	-4.61424	-260.089	-51.3434	-12.5675	-300.253	-20.0169
-1.95817	-4.67525	-260.295	-51.4186	-12.7739	-299.635	-20.094
-1.95193	-4.8039	-260.495	-51.5109	-13.0835	-298.32	-20.0338
-1.94568	-5.49556	-260.606	-51.817	-13.8304	-296.844	-20.0316
-1.93944	-6.55395	-260.762	-52.6013	-14.8182	-295.43	-20.0515
-1.9332	-7.4133	-261.028	-53.2754	-15.624	-294.488	-20.1004
-1.92696	-7.9997	-261.244	-53.8508	-16.2291	-293.971	-20.1256
-1.92071	-8.38088	-261.392	-54.3534	-16.7142	-293.721	-20.0614
-1.91447	-8.54549	-261.497	-54.8963	-17.118	-293.635	-19.8504
-1.90823	-8.73414	-261.568	-55.1872	-17.3842	-293.629	-19.5957
-1.90199	-8.84772	-261.528	-55.3363	-17.5971	-293.565	-19.3505
-1.89575	-8.8199	-261.441	-55.4594	-17.764	-293.354	-19.1932
-1.8895	-8.86624	-261.431	-55.7974	-17.7651	-292.796	-18.9895
-1.88326	-8.31284	-261.4	-55.8986	-17.2861	-292.302	-18.7381
-1.87702	-7.38855	-261.243	-55.3996	-16.4848	-291.729	-18.4675
-1.87078	-6.73399	-260.981	-55.0358	-15.8157	-290.718	-18.1312
-1.86454	-6.20527	-260.724	-54.7513	-15.3128	-289.705	-17.8301
-1.85829	-5.76852	-260.495	-54.5289	-14.8938	-288.868	-17.6357
-1.85205	-5.52618	-260.313	-54.3457	-14.495	-288.279	-17.4671
-1.84581	-5.27337	-260.182	-54.2326	-14.176	-287.869	-17.3107
-1.83957	-5.0731	-260.086	-54.1846	-13.9092	-287.564	-17.1946
-1.83332	-4.92281	-259.991	-54.0607	-13.6312	-287.336	-17.1731
-1.82708	-4.68389	-259.877	-53.7877	-13.3428	-287.024	-17.1425
-1.82084	-4.43384	-259.767	-53.4099	-13.0845	-286.639	-17.0724
-1.8146	-4.16298	-259.658	-52.972	-12.8661	-286.176	-16.9862
-1.80835	-3.92211	-259.527	-52.5213	-12.657	-285.618	-16.8655
-1.80211	-3.73866	-259.402	-52.0626	-12.4435	-285.022	-16.714
-1.79587	-3.58337	-259.316	-51.5664	-12.2341	-284.391	-16.5321
-1.78963	-3.41637	-259.242	-50.9861	-12.0901	-283.631	-16.4317
-1.78338	-3.22743	-259.101	-50.3402	-11.8813	-282.837	-16.3349
-1.77714	-3.02269	-258.922	-49.7186	-11.6336	-282.016	-16.1513
-1.7709	-2.86623	-258.838	-49.0727	-11.4843	-281.098	-15.8744
-1.76466	-2.74291	-258.731	-48.5151	-11.3565	-280.135	-15.6333
-1.75842	-2.66524	-258.599	-48.0641	-11.2469	-279.191	-15.4853
-1.75217	-2.61995	-258.539	-47.6179	-11.2014	-278.308	-15.3878
-1.74593	-2.50233	-258.498	-47.1922	-11.1323	-277.534	-15.3242
-1.73969	-2.38899	-258.47	-46.8201	-11.0648	-276.76	-15.2882
-1.73345	-2.431	-258.474	-46.4443	-11.0282	-275.975	-15.2979
-1.72721	-2.41246	-258.498	-46.1896	-10.9896	-275.34	-15.3105
-1.72096	-2.41287	-258.597	-45.9333	-11.0206	-274.731	-15.3468
-1.71472	-2.46793	-258.722	-45.5194	-11.1323	-274.097	-15.4672
-1.70848	-2.58283	-258.726	-45.2433	-11.2201	-273.466	-15.6285
-1.70224	-2.65379	-258.755	-44.9868	-11.3067	-272.928	-15.767
-1.69599	-2.68583	-258.863	-44.677	-11.3707	-272.461	-15.7937
-1.68975	-2.80505	-258.953	-44.4039	-11.4254	-272.014	-15.8172
-1.68351	-2.93687	-259.098	-44.1252	-11.5017	-271.549	-15.8496
-1.67727	-3.02543	-259.251	-43.8742	-11.5897	-271.079	-15.8541
-1.67102	-3.02968	-259.295	-43.6801	-11.7245	-270.63	-15.8249
-1.66478	-3.07021	-259.309	-43.4956	-11.799	-270.15	-15.7854
-1.65854	-3.09768	-259.299	-43.3137	-11.8119	-269.686	-15.7595
-1.6523	-3.01399	-259.276	-43.0949	-11.8053	-269.256	-15.6899
-1.64606	-2.9561	-259.325	-42.8909	-11.7956	-268.882	-15.645
-1.63981	-2.91638	-259.34	-42.7234	-11.8107	-268.538	-15.6611
-1.63357	-2.85732	-259.226	-42.603	-11.8534	-268.194	-15.6449
-1.62733	-2.83231	-259.168	-42.5685	-11.839	-267.856	-15.6225
-1.62109	-2.88501	-259.131	-42.5191	-11.7873	-267.506	-15.6264
-1.61484	-2.98971	-259.107	-42.3399	-11.7029	-267.136	-15.6301
-1.6086	-2.92249	-259.115	-42.1214	-11.621	-266.842	-15.6372
-1.60236	-2.86061	-259.125	-41.9242	-11.5963	-266.535	-15.6292
-1.59612	-2.8421	-259.143	-41.7773	-11.5929	-266.195	-15.5946
-1.58987	-2.93118	-259.151	-41.7647	-11.5649	-265.858	-15.5444
-1.58363	-2.99871	-259.111	-41.7072	-11.5559	-265.525	-15.4479
-1.57739	-3.07871	-259.131	-41.6128	-11.5561	-265.209	-15.2942
-1.57115	-3.18364	-259.26	-41.5462	-11.5178	-264.962	-15.3303
-1.56491	-3.1591	-259.247	-41.4659	-11.5435	-264.724	-15.3921
-1.55866	-3.08627	-259.111	-41.3904	-11.6275	-264.537	-15.4245
-1.55242	-2.99672	-258.979	-41.419	-11.7131	-264.417	-15.4231
-1.54618	-3.043	-258.93	-41.4447	-11.7564	-264.209	-15.4657
-1.53994	-3.06162	-258.889	-41.448	-11.7685	-264.041	-15.5519
-1.53369	-3.00038	-258.811	-41.4081	-11.7245	-263.959	-15.5472
-1.52745	-3.00158	-258.842	-41.3778	-11.7378	-263.908	-15.5676
-1.52121	-2.99735	-258.911	-41.3289	-11.7226	-263.848	-15.635
-1.51497	-2.98425	-258.939	-41.2329	-11.6478	-263.753	-15.7434
-1.50873	-2.98877	-258.907	-41.1723	-11.6669	-263.641	-15.76
-1.50248	-2.98884	-258.965	-41.1228	-11.6642	-263.572	-15.7109
-1.49624	-2.98148	-259.107	-41.0644	-11.6336	-263.512	-15.616
-1.49	-2.98057	-259.165	-40.949	-11.6364	-263.414	-15.6061
-1.48376	-2.98672	-259.176	-40.8659	-11.5844	-263.335	-15.5864
-1.47751	-3.01503	-259.194	-40.8177	-11.5435	-263.259	-15.5219
-1.47127	-3.06615	-259.242	-40.8461	-11.6466	-263.175	-15.5692
-1.46503	-3.06351	-259.269	-40.8752	-11.7043	-263.072	-15.5954
-1.45879	-3.02365	-259.262	-40.9047	-11.7503	-263.002	-15.5541
-1.45254	-2.92967	-259.201	-40.8996	-11.8427	-262.967	-15.4834
-1.4463	-2.89411	-259.177	-40.806	-11.8649	-262.933	-15.4134
-1.44006	-2.88526	-259.174	-40.7254	-11.8541	-262.946	-15.3544
-1.43382	-2.88933	-259.218	-40.7177	-11.8342	-263.024	-15.3494
-1.42758	-2.97457	-259.328	-40.7304	-11.7955	-263.149	-15.3397
-1.42133	-2.97105	-259.425	-40.7197	-11.8223	-263.306	-15.3221
-1.41509	-2.92281	-259.463	-40.6718	-11.9022	-263.473	-15.292
-1.40885	-2.95569	-259.446	-40.6011	-11.8937	-263.638	-15.2057
-1.40261	-2.97991	-259.407	-40.5378	-11.876	-263.882	-15.1403
-1.39636	-3.01085	-259.39	-40.4989	-11.8765	-264.194	-15.1476
-1.39012	-3.04064	-259.392	-40.5358	-11.8734	-264.546	-15.1532
-1.38388	-3.05813	-259.358	-40.5786	-11.831	-264.851	-15.1674
-1.37764	-3.09163	-259.28	-40.5813	-11.7835	-265.087	-15.1976
-1.37139	-3.12972	-259.184	-40.4724	-11.7833	-265.27	-15.2091
-1.36515	-3.04151	-259.09	-40.415	-11.8219	-265.404	-15.1781
-1.35891	-3.00867	-258.988	-40.4009	-11.8358	-265.462	-15.1315
-1.35267	-3.01351	-258.894	-40.4097	-11.8034	-265.446	-15.1441
-1.34643	-3.04689	-258.88	-40.3762	-11.7204	-265.463	-15.1409
-1.34018	-3.0558	-258.834	-40.3407	-11.6126	-265.421	-15.1041
-1.33394	-3.06564	-258.718	-40.3231	-11.4996	-265.287	-15.0654
-1.3277	-3.12601	-258.715	-40.2843	-11.4412	-265.057	-15.0307
-1.32146	-3.06399	-258.74	-40.2653	-11.4596	-264.797	-14.9858
-1.31522	-2.97921	-258.767	-40.2763	-11.4948	-264.527	-14.9218
-1.30897	-2.97724	-258.854	-40.2946	-11.4478	-264.264	-14.8489
-1.30273	-3.03317	-258.921	-40.2307	-11.3543	-264.031	-14.7893
-1.29649	-3.09051	-258.947	-40.1154	-11.2795	-263.853	-14.732
-1.29025	-3.11967	-258.963	-40.0848	-11.2822	-263.725	-14.6669
-1.284	-3.10454	-259.012	-40.0945	-11.2932	-263.546	-14.6412
-1.27776	-3.05811	-259.106	-40.1107	-11.2806	-263.346	-14.6324
-1.27152	-2.95329	-259.156	-40.1053	-11.257	-263.162	-14.6172
-1.26528	-2.89489	-259.097	-40.0969	-11.2016	-263.036	-14.6017
-1.25903	-2.8865	-259.058	-40.0843	-11.1283	-262.931	-14.5961
-1.25279	-2.87025	-259.101	-40.082	-11.0562	-262.816	-14.616
-1.24655	-2.7347	-259.062	-40.0379	-11.0945	-262.688	-14.6333
-1.24031	-2.63091	-259.023	-40.0269	-11.1878	-262.512	-14.66
-1.23406	-2.57601	-259.002	-40.0962	-11.2663	-262.322	-14.7163
-1.22782	-2.57093	-259.002	-40.0124	-11.257	-262.189	-14.6882
-1.22158	-2.51312	-258.942	-39.9365	-11.262	-262.066	-14.6635
-1.21534	-2.49155	-258.877	-39.9143	-11.2974	-261.944	-14.6984
-1.2091	-2.54756	-258.985	-39.8293	-11.3683	-261.832	-14.7033
-1.20285	-2.59484	-259.121	-39.7633	-11.4451	-261.726	-14.6973
-1.19661	-2.63837	-259.204	-39.6992	-11.5092	-261.62	-14.6853
-1.19037	-2.65684	-259.141	-39.6197	-11.5385	-261.502	-14.58
-1.18413	-2.69992	-259.089	-39.592	-11.5486	-261.37	-14.5226
-1.17789	-2.68732	-259.065	-39.5606	-11.5121	-261.287	-14.5249
-1.17164	-2.62714	-259.048	-39.5437	-11.3856	-261.239	-14.48
-1.1654	-2.57615	-258.971	-39.5907	-11.3065	-261.161	-14.4801
-1.15916	-2.56063	-258.901	-39.5676	-11.2734	-261.074	-14.4654
-1.15292	-2.55317	-258.919	-39.4139	-11.2388	-260.994	-14.3324
-1.14667	-2.49859	-258.851	-39.3693	-11.1765	-260.915	-14.2763
-1.14043	-2.45173	-258.722	-39.3448	-11.074	-260.832	-14.2677
-1.13419	-2.43405	-258.542	-39.3126	-10.957	-260.767	-14.2454
-1.12795	-2.41873	-258.484	-39.33	-10.8819	-260.738	-14.2567
-1.1217	-2.45943	-258.46	-39.3567	-10.7902	-260.619	-14.2449
-1.11546	-2.48397	-258.473	-39.3601	-10.738	-260.456	-14.2213
-1.10922	-2.43232	-258.511	-39.2885	-10.8038	-260.332	-14.1462
-1.10298	-2.4337	-258.633	-39.1904	-10.8232	-260.241	-14.0767
-1.09674	-2.44617	-258.741	-39.1078	-10.8197	-260.129	-14.0672
-1.09049	-2.46175	-258.634	-39.0769	-10.847	-259.985	-14.1498
-1.08425	-2.51383	-258.525	-38.996	-10.8817	-259.904	-14.1318
-1.07801	-2.53473	-258.493	-38.9144	-10.9172	-259.846	-14.0452
-1.07177	-2.55482	-258.614	-38.8575	-10.9484	-259.737	-14.0343
-1.06552	-2.59905	-258.614	-38.7703	-10.9881	-259.52	-14.0751
-1.05928	-2.58226	-258.552	-38.7154	-11.015	-259.402	-14.0844
-1.05304	-2.55869	-258.493	-38.6936	-11.0249	-259.365	-14.0431
-1.0468	-2.5071	-258.469	-38.6884	-11.0533	-259.264	-14.1014
-1.04055	-2.44988	-258.421	-38.7129	-11.1112	-259.123	-14.1564
-1.03431	-2.42151	-258.375	-38.7568	-11.1548	-259.013	-14.1445
-1.02807	-2.42755	-258.482	-38.8353	-11.1275	-258.925	-14.1555
-1.02183	-2.42524	-258.536	-38.8693	-11.0956	-258.799	-14.2027
-1.01559	-2.38009	-258.523	-38.8463	-11.1181	-258.649	-14.2438
-1.00934	-2.27808	-258.53	-38.7389	-11.2113	-258.515	-14.2291
-1.0031	-2.19018	-258.589	-38.6688	-11.2723	-258.463	-14.1805
-0.996859	-2.11646	-258.654	-38.6347	-11.3193	-258.421	-14.1373
-0.990617	-2.07225	-258.709	-38.6138	-11.3813	-258.357	-14.1702
-0.984374	-2.19465	-258.688	-38.5123	-11.3788	-258.307	-14.1864
-0.978132	-2.27086	-258.679	-38.4038	-11.3089	-258.243	-14.1729
-0.97189	-2.2936	-258.712	-38.3395	-11.2156	-258.172	-14.1434
-0.965647	-2.23909	-258.695	-38.2412	-11.2502	-258.131	-14.1076
-0.959405	-2.21976	-258.729	-38.2161	-11.256	-258.082	-14.1011
-0.953163	-2.23322	-258.804	-38.2909	-11.1666	-258.01	-14.1224
-0.946921	-2.22696	-258.753	-38.4376	-11.0805	-257.91	-14.1161
-0.940678	-2.18681	-258.702	-38.4576	-11.0376	-257.862	-14.1286
-0.934436	-2.16268	-258.633	-38.3879	-11.0065	-257.855	-14.1535
-0.928194	-2.1959	-258.555	-38.3776	-10.9696	-257.829	-14.0936
-0.921952	-2.19586	-258.515	-38.4243	-10.9266	-257.788	-14.0294
-0.915709	-2.1597	-258.483	-38.4716	-10.9234	-257.748	-13.9951
-0.909467	-2.09001	-258.447	-38.5014	-10.9839	-257.715	-13.9313
-0.903225	-2.14041	-258.451	-38.5349	-10.9581	-257.671	-13.8134
-0.896982	-2.16142	-258.433	-38.5123	-10.9478	-257.575	-13.6941
-0.89074	-2.16452	-258.314	-38.4062	-11.0049	-257.471	-13.6259
-0.884498	-2.20118	-258.285	-38.334	-11.0481	-257.462	-13.5871
-0.878256	-2.24152	-258.303	-38.3411	-11.0413	-257.417	-13.5548
-0.872013	-2.24923	-258.338	-38.4006	-10.9823	-257.291	-13.5299
-0.865771	-2.20188	-258.389	-38.3455	-10.9238	-257.199	-13.5393
-0.859529	-2.15052	-258.421	-38.3097	-10.8769	-257.148	-13.5635
-0.853287	-2.12972	-258.391	-38.2882	-10.8249	-257.086	-13.5995
-0.847044	-2.15368	-258.325	-38.1872	-10.8174	-256.989	-13.6786
-0.840802	-2.04031	-258.264	-38.1039	-10.8449	-256.873	-13.7366
-0.83456	-1.89241	-258.267	-38.065	-10.8709	-256.804	-13.7438
-0.828317	-1.73865	-258.383	-38.0852	-10.8836	-256.798	-13.7304
-0.822075	-1.72892	-258.405	-38.0599	-10.834	-256.697	-13.7325
-0.815833	-1.77317	-258.385	-38.0281	-10.7778	-256.567	-13.7415
-0.809591	-1.83432	-258.427	-38.0204	-10.7622	-256.506	-13.7413
-0.803348	-1.90159	-258.322	-38.0484	-10.7378	-256.415	-13.7169
-0.797106	-1.97508	-258.238	-38.0345	-10.7531	-256.303	-13.6829
-0.790864	-2.03804	-258.342	-37.9737	-10.8288	-256.217	-13.6603
-0.784621	-2.03682	-258.406	-37.9649	-10.841	-256.153	-13.6627
-0.778379	-2.08087	-258.411	-37.9716	-10.798	-256.1	-13.6969
-0.772137	-2.17632	-258.368	-37.9823	-10.741	-256.029	-13.7468
-0.765895	-2.34047	-258.335	-37.9836	-10.7068	-255.918	-13.793
-0.759652	-2.36897	-258.373	-37.9886	-10.7321	-255.864	-13.8182
-0.75341	-2.34045	-258.461	-37.9768	-10.787	-255.871	-13.8222
-0.747168	-2.27135	-258.385	-37.9382	-10.8254	-255.872	-13.8409
-0.740926	-2.16209	-258.365	-37.8944	-10.8534	-255.87	-13.8682
-0.734683	-2.05082	-258.34	-37.8685	-10.8498	-255.841	-13.8776
-0.728441	-1.95999	-258.268	-37.8591	-10.7901	-255.78	-13.8456
-0.722199	-1.95281	-258.271	-37.8773	-10.7787	-255.696	-13.8225
-0.715956	-1.92346	-258.31	-37.881	-10.8236	-255.605	-13.8109
-0.709714	-1.85882	-258.351	-37.8577	-10.8685	-255.518	-13.7742
-0.703472	-1.80232	-258.278	-37.7885	-10.8573	-255.462	-13.7236
-0.69723	-1.7432	-258.154	-37.7364	-10.8346	-255.417	-13.6972
-0.690987	-1.70495	-258.064	-37.708	-10.8476	-255.34	-13.7014
-0.684745	-1.71541	-258.141	-37.6774	-10.8803	-255.239	-13.6587
-0.678503	-1.73696	-258.245	-37.6618	-10.8583	-255.132	-13.5827
-0.672261	-1.74053	-258.329	-37.664	-10.7877	-255.034	-13.5115
-0.666018	-1.73065	-258.296	-37.6826	-10.7682	-254.954	-13.4836
-0.659776	-1.72955	-258.224	-37.6286	-10.6878	-254.89	-13.4635
-0.653534	-1.79127	-258.119	-37.5487	-10.5626	-254.84	-13.4366
-0.647292	-1.89391	-258.032	-37.4963	-10.5244	-254.809	-13.4135
-0.641049	-1.83957	-258	-37.4676	-10.5199	-254.752	-13.3992
-0.634807	-1.78415	-257.98	-37.4535	-10.4906	-254.664	-13.3927
-0.628565	-1.74665	-258.02	-37.4711	-10.4605	-254.576	-13.3826
-0.622322	-1.70132	-257.933	-37.4565	-10.4302	-254.471	-13.3852
-0.61608	-1.65086	-257.828	-37.4202	-10.4326	-254.388	-13.3999
-0.609838	-1.59598	-257.834	-37.3752	-10.4692	-254.363	-13.4179
-0.603596	-1.62935	-257.801	-37.3518	-10.4767	-254.333	-13.3821
-0.597353	-1.64792	-257.776	-37.3859	-10.4879	-254.301	-13.3112
-0.591111	-1.63091	-257.81	-37.4351	-10.4953	-254.285	-13.2537
-0.584869	-1.56568	-257.867	-37.3906	-10.4235	-254.229	-13.2431
-0.578627	-1.52801	-257.936	-37.3553	-10.3275	-254.166	-13.2386
-0.572384	-1.51985	-257.978	-37.3247	-10.2451	-254.15	-13.2236
-0.566142	-1.58021	-257.922	-37.2715	-10.1987	-254.168	-13.2363
-0.5599	-1.63856	-257.976	-37.2061	-10.1511	-254.205	-13.253
-0.553657	-1.73005	-258.086	-37.1159	-10.1044	-254.213	-13.2351
-0.547415	-1.84963	-258.121	-36.9998	-10.1179	-254.169	-13.1472
-0.541173	-1.85504	-258.171	-36.9438	-10.137	-254.072	-13.1091
-0.534931	-1.82883	-258.198	-36.9031	-10.1567	-253.969	-13.1236
-0.528688	-1.81689	-258.188	-36.8348	-10.204	-253.934	-13.0809
-0.522446	-1.88057	-258.173	-36.8602	-10.2939	-253.957	-13.0193
-0.516204	-1.98992	-258.198	-36.8584	-10.426	-253.955	-12.9824
-0.509961	-2.07235	-258.264	-36.7884	-10.5646	-253.871	-12.9697
-0.503719	-2.09172	-258.347	-36.7146	-10.6368	-253.759	-12.8824
-0.497477	-2.12112	-258.398	-36.7279	-10.6971	-253.645	-12.76
-0.491235	-2.12439	-258.402	-36.8189	-10.7594	-253.531	-12.6779
-0.484992	-2.05763	-258.384	-36.9427	-10.7392	-253.411	-12.7224
-0.47875	-2.01559	-258.379	-36.9465	-10.6872	-253.392	-12.7741
-0.472508	-1.99064	-258.362	-36.9065	-10.6439	-253.457	-12.7737
-0.466266	-1.96768	-258.36	-36.9267	-10.5911	-253.441	-12.8272
-0.460023	-1.86952	-258.265	-36.9209	-10.5125	-253.385	-12.8782
-0.453781	-1.79547	-258.121	-36.9102	-10.4203	-253.341	-12.8656
-0.447539	-1.76169	-258.036	-36.9005	-10.3332	-253.32	-12.7863
-0.441296	-1.7115	-257.972	-36.913	-10.2525	-253.272	-12.7252
-0.435054	-1.66056	-257.899	-36.8945	-10.1863	-253.198	-12.7208
-0.428812	-1.6386	-257.75	-36.8302	-10.1459	-253.15	-12.7526
-0.42257	-1.67878	-257.585	-36.7752	-10.1746	-253.153	-12.7535
-0.416327	-1.70143	-257.48	-36.7731	-10.2334	-253.139	-12.7261
-0.410085	-1.70416	-257.485	-36.8013	-10.2772	-253.05	-12.6999
-0.403843	-1.69755	-257.462	-36.8252	-10.2904	-252.947	-12.6544
-0.397601	-1.66802	-257.526	-36.8442	-10.3091	-252.85	-12.6279
-0.391358	-1.63334	-257.681	-36.8597	-10.3552	-252.783	-12.6458
-0.385116	-1.63235	-257.704	-36.8529	-10.4012	-252.746	-12.6965
-0.378874	-1.58999	-257.677	-36.8	-10.4396	-252.753	-12.7247
-0.372631	-1.52703	-257.654	-36.7402	-10.4622	-252.794	-12.7048
-0.366389	-1.46412	-257.754	-36.6941	-10.4482	-252.823	-12.6621
-0.360147	-1.41462	-257.831	-36.6691	-10.3771	-252.795	-12.6087
-0.353905	-1.37333	-257.866	-36.642	-10.2961	-252.704	-12.5786
-0.347662	-1.34113	-257.902	-36.5959	-10.2531	-252.598	-12.612
-0.34142	-1.35518	-257.989	-36.493	-10.2691	-252.513	-12.6412
-0.335178	-1.41665	-258.039	-36.3733	-10.2794	-252.441	-12.6304
-0.328936	-1.47474	-257.98	-36.2747	-10.2396	-252.368	-12.6096
-0.322693	-1.49682	-258.046	-36.2804	-10.1698	-252.349	-12.5054
-0.316451	-1.55355	-258.074	-36.2788	-10.1095	-252.345	-12.3869
-0.310209	-1.608	-257.985	-36.2531	-10.0802	-252.301	-12.3377
-0.303966	-1.63454	-257.834	-36.2586	-10.0716	-252.261	-12.3636
-0.297724	-1.68394	-257.769	-36.2348	-10.0976	-252.231	-12.3923
-0.291482	-1.74952	-257.795	-36.2069	-10.1178	-252.203	-12.3553
-0.28524	-1.8083	-257.812	-36.2088	-10.0708	-252.172	-12.3086
-0.278997	-1.7413	-257.748	-36.2428	-10.0122	-252.133	-12.3004
-0.272755	-1.649	-257.631	-36.297	-9.98626	-252.091	-12.3013
-0.266513	-1.5676	-257.522	-36.361	-9.9826	-252.022	-12.2884
-0.26027	-1.45553	-257.417	-36.3747	-10.0107	-251.923	-12.3259
-0.254028	-1.40462	-257.373	-36.3798	-10.0358	-251.855	-12.3982
-0.247786	-1.42552	-257.412	-36.377	-10.0429	-251.833	-12.476
-0.241544	-1.45265	-257.563	-36.3772	-10.056	-251.762	-12.4619
-0.235301	-1.43923	-257.678	-36.3925	-10.0521	-251.678	-12.4146
-0.229059	-1.40405	-257.687	-36.402	-10.0334	-251.673	-12.4401
-0.222817	-1.31257	-257.663	-36.3523	-10.0272	-251.653	-12.441
-0.216575	-1.33095	-257.69	-36.3041	-10.027	-251.609	-12.3679
-0.210332	-1.41088	-257.767	-36.2766	-10.0271	-251.603	-12.2493
-0.20409	-1.4985	-257.818	-36.2657	-10.0192	-251.638	-12.17
-0.197848	-1.54941	-257.842	-36.2018	-9.97376	-251.649	-12.1519
-0.191605	-1.55684	-257.87	-36.1546	-9.9014	-251.579	-12.1254
-0.185363	-1.55316	-257.935	-36.2045	-9.8311	-251.477	-12.0502
-0.179121	-1.53944	-257.882	-36.2354	-9.80175	-251.44	-12.0236
-0.172879	-1.50202	-257.804	-36.1992	-9.80093	-251.454	-12.0541
-0.166636	-1.46192	-257.757	-36.0972	-9.79136	-251.398	-12.0132
-0.160394	-1.53969	-257.733	-36.0396	-9.76642	-251.394	-11.9703
-0.154152	-1.59976	-257.718	-36.007	-9.73745	-251.435	-12.0119
-0.14791	-1.59941	-257.694	-35.9774	-9.73389	-251.414	-12.1075
-0.141667	-1.52061	-257.683	-35.9478	-9.761	-251.384	-12.1436
-0.135425	-1.43958	-257.654	-35.9471	-9.82713	-251.379	-12.129
-0.129183	-1.34697	-257.619	-35.9251	-9.9128	-251.403	-12.1355
-0.122941	-1.21488	-257.551	-35.8431	-9.96907	-251.379	-12.1511
-0.116698	-1.16594	-257.528	-35.7543	-9.99014	-251.336	-12.1431
-0.110456	-1.15458	-257.552	-35.7269	-10.0124	-251.333	-12.1216
-0.104214	-1.11723	-257.647	-35.8272	-10.0493	-251.294	-12.1385
-0.097971	-1.0556	-257.646	-35.9015	-10.0899	-251.236	-12.1307
-0.091729	-1.01301	-257.595	-35.9177	-10.1132	-251.205	-12.0768
-0.085487	-1.00703	-257.587	-35.9066	-10.1216	-251.168	-12.0461
-0.079245	-1.01288	-257.606	-35.8617	-10.0575	-251.095	-12.027
-0.073002	-1.06916	-257.606	-35.8662	-9.93199	-250.992	-12.0089
-0.06676	-1.16673	-257.571	-35.9539	-9.83198	-250.923	-12.0264
-0.060518	-1.24685	-257.578	-36.0101	-9.77913	-250.912	-12.0653
-0.054276	-1.29071	-257.553	-36.0006	-9.74378	-250.899	-12.0807
-0.048033	-1.33785	-257.465	-35.9253	-9.70745	-250.823	-12.0724
-0.041791	-1.39042	-257.385	-35.8047	-9.71818	-250.77	-12.0681
-0.035549	-1.38215	-257.393	-35.7159	-9.76418	-250.699	-12.0865
-0.029306	-1.3132	-257.457	-35.6618	-9.7755	-250.616	-12.1236
-0.023064	-1.1946	-257.425	-35.6388	-9.7013	-250.585	-12.1442
-0.016822	-1.1682	-257.419	-35.6527	-9.69443	-250.591	-12.1477
-0.01058	-0.346376	-28.442	-11.1296	-4.84576	-169.945	-6.07425
-0.004337	0.018571	-0.00241	0.011249	-0.062325	0.017944	0.009764
0.001905	0.008226	-0.021497	0.030017	-0.127316	0.021322	0.024943
0.008147	0.014574	-0.085629	0.001574	-0.209744	-0.003504	0.058386
0.01439	0.03344	-0.216306	-0.108717	-0.248217	-0.06663	0.072274
0.020632	0.010471	-0.266575	-0.16514	-0.257689	-0.179451	0.066857
0.026874	-0.082856	-0.27773	-0.212697	-0.279576	-0.304264	0.04904
0.033116	-0.228082	-0.261566	-0.291104	-0.33829	-0.381726	-0.007986
0.039359	-0.374542	-0.340258	-0.361389	-0.445424	-0.476672	-0.040845
0.045601	-0.465481	-0.458646	-0.406645	-0.538743	-0.569653	-0.050021
0.051843	-0.492442	-0.617253	-0.424755	-0.585145	-0.582837	-0.116853
0.058085	-0.414013	-0.757432	-0.398012	-0.628505	-0.601351	-0.177409
0.064328	-0.318536	-0.88418	-0.409104	-0.615197	-0.637331	-0.21947
0.07057	-0.247185	-1.01329	-0.438331	-0.546425	-0.656116	-0.258352
0.076812	-0.211518	-1.16897	-0.428469	-0.459332	-0.611818	-0.195877
0.083055	-0.123277	-1.33277	-0.456694	-0.366191	-0.534018	-0.084278
0.089297	0.012741	-1.481	-0.484846	-0.292777	-0.452196	0.002144
0.095539	0.138076	-1.55895	-0.457431	-0.228522	-0.366828	0.121241
0.101781	0.286787	-1.624	-0.388308	-0.155332	-0.236817	0.216136
0.108024	0.410141	-1.67467	-0.295713	-0.078174	-0.089851	0.280151
0.114266	0.450169	-1.70145	-0.180507	-0.020445	-0.026447	0.40268
0.120508	0.453162	-1.73954	-0.122566	0.01924	0.025625	0.520031
0.12675	0.433198	-1.80904	-0.097647	0.071013	0.080666	0.574263
0.132993	0.408837	-1.95508	-0.078132	0.127709	0.163005	0.577567
0.139235	0.448213	-1.94421	-0.045439	0.114339	0.218063	0.538549
0.145477	0.44594	-1.93946	0.000693	0.088794	0.254175	0.496756
0.15172	0.417862	-2.0073	0.037974	0.109293	0.302317	0.474162
0.157962	0.431966	-2.13812	0.033479	0.096634	0.362352	0.495852
0.164204	0.395046	-2.18981	-0.004915	0.066195	0.413687	0.524247
0.170446	0.352679	-2.16679	-0.066667	0.071264	0.430196	0.486873
0.176689	0.331553	-2.2091	-0.14851	0.122972	0.464312	0.411647
0.182931	0.272923	-2.33136	-0.154565	0.159774	0.507369	0.371778
0.189173	0.23224	-2.43349	-0.110771	0.13189	0.523002	0.401216
0.195415	0.226126	-2.45315	-0.066225	0.083521	0.537185	0.471046
0.201658	0.194721	-2.4909	-0.025186	0.112223	0.560271	0.528386
0.2079	0.176692	-2.47428	0.012231	0.176589	0.574914	0.553787
0.214142	0.176796	-2.3875	0.047989	0.197028	0.554945	0.60273
0.220385	0.138101	-2.30315	0.140871	0.284552	0.525044	0.612678
0.226627	0.133173	-2.27174	0.241423	0.372919	0.522289	0.611957
0.232869	0.189059	-2.28469	0.308583	0.376621	0.584083	0.701556
0.239111	0.267926	-2.13713	0.370575	0.370118	0.611367	0.794793
0.245354	0.346026	-1.89527	0.432175	0.380787	0.626894	0.827092
0.251596	0.41403	-1.59707	0.497551	0.401665	0.650677	0.824262
0.257838	0.44465	-1.26399	0.539011	0.416007	0.684051	0.797802
0.264081	0.442847	-1.02397	0.601101	0.372781	0.746272	0.769188
0.270323	0.454149	-0.850693	0.692383	0.312534	0.848138	0.752052
0.276565	0.517087	-0.686771	0.770645	0.315381	0.944694	0.738212
0.282807	0.590063	-0.545896	0.737524	0.292195	1.01178	0.748551
0.28905	0.635831	-0.414085	0.671357	0.263506	1.01665	0.767516
0.295292	0.677206	-0.256944	0.63591	0.286695	0.963393	0.731143
0.301534	0.711935	-0.133536	0.61425	0.277853	0.9193	0.700089
0.307776	0.684801	-0.049707	0.593795	0.240581	0.91852	0.729038
0.314019	0.631012	-0.021719	0.584615	0.215948	0.989225	0.768427
0.320261	0.676953	0.015908	0.570067	0.2041	1.03862	0.773374
0.326503	0.762542	0.080322	0.479451	0.214232	1.04825	0.741268
0.332746	0.804062	0.160934	0.347215	0.224208	0.99563	0.734565
0.338988	0.794016	0.246422	0.267454	0.208021	0.970923	0.741784
0.34523	0.814337	0.347077	0.268893	0.21452	0.978613	0.74169
0.351472	0.834156	0.449114	0.307127	0.251058	1.01678	0.732327
0.357715	0.799679	0.507761	0.349718	0.245278	1.11435	0.704488
0.363957	0.715679	0.498737	0.427019	0.252485	1.18165	0.655553
0.370199	0.662227	0.467212	0.473723	0.295722	1.14752	0.617114
0.376441	0.658094	0.506883	0.427392	0.314948	1.151	0.607627
0.382684	0.600943	0.599334	0.473978	0.294869	1.16303	0.664417
0.388926	0.523933	0.691504	0.599832	0.246006	1.17005	0.768268
0.395168	0.460432	0.712157	0.709737	0.199954	1.18939	0.853057
0.401411	0.410486	0.776023	0.777597	0.172742	1.2011	0.922472
0.407653	0.340781	0.870769	0.802762	0.160489	1.21255	0.974868
0.413895	0.264192	0.965602	0.797914	0.16855	1.20021	1.01803
0.420137	0.229481	1.06541	0.779646	0.223326	1.17247	1.06231
0.42638	0.247214	1.16834	0.724366	0.256855	1.17933	1.09846
0.432622	0.260139	1.24428	0.695155	0.275986	1.2305	1.1078
0.438864	0.243381	1.3612	0.79238	0.376585	1.2211	1.07535
0.445107	0.191802	1.42356	0.815808	0.514796	1.20284	1.02743
0.451349	0.15613	1.44413	0.753882	0.638493	1.20762	1.00517
0.457591	0.164834	1.54144	0.699244	0.736207	1.21736	0.982944
0.463833	0.152546	1.54696	0.638871	0.810618	1.21886	0.946973
0.470076	0.115052	1.47687	0.631264	0.858719	1.23205	0.896814
0.476318	0.069025	1.40494	0.713281	0.880637	1.26785	0.84276
0.48256	0.067941	1.33327	0.807136	0.879557	1.28276	0.83823
0.488802	0.097727	1.27757	0.890783	0.886715	1.2874	0.894243
0.495045	0.121345	1.26077	0.964037	0.915115	1.27923	0.925135
0.501287	0.13749	1.11402	0.960973	0.891575	1.25366	0.987433
0.507529	0.167877	0.930381	0.985962	0.848493	1.21926	1.06521
0.513772	0.189871	0.777012	1.08136	0.833312	1.21317	1.04938
0.520014	0.182529	0.720219	1.18107	0.812253	1.21829	0.996893
0.526256	0.225447	0.688564	1.24787	0.775268	1.22234	0.959789
0.532498	0.320721	0.637632	1.25562	0.725866	1.23141	0.932638
0.538741	0.410391	0.557848	1.21099	0.675766	1.24638	0.928255
0.544983	0.380495	0.501278	1.1421	0.630807	1.2636	0.937978
0.551225	0.306971	0.476023	1.0646	0.57095	1.30529	0.944972
0.557467	0.26807	0.467191	0.991832	0.498009	1.43378	0.981391
0.56371	0.267821	0.505363	0.950667	0.429563	1.56007	0.984145
0.569952	0.280928	0.562135	0.905761	0.37119	1.65975	0.951892
0.576194	0.293213	0.612204	0.832983	0.331698	1.72923	1.004
0.582437	0.352375	0.56001	0.772063	0.309044	1.80452	1.06835
0.588679	0.363188	0.507053	0.764345	0.332796	1.87078	1.08905
0.594921	0.320913	0.509372	0.785686	0.423366	1.90423	1.17708
0.601163	0.3077	0.506993	0.794247	0.534288	1.9425	1.26731
0.607406	0.347882	0.474	0.817073	0.642796	1.97136	1.29427
0.613648	0.403035	0.416984	0.845164	0.715071	1.97634	1.30166
0.61989	0.435068	0.326793	0.843399	0.752957	1.95024	1.30641
0.626132	0.465997	0.231839	0.81772	0.771114	1.94513	1.33211
0.632375	0.514695	0.148946	0.803505	0.787218	1.97265	1.37849
0.638617	0.561111	0.152039	0.826391	0.81714	1.96959	1.36814
0.644859	0.53404	0.144068	0.860347	0.862554	1.97335	1.3454
0.651101	0.53012	0.113759	0.898141	0.862723	1.9913	1.3767
0.657344	0.600205	0.143842	0.948271	0.771304	1.97304	1.35017
0.663586	0.635572	0.214678	0.98575	0.651438	1.97048	1.31434
0.669828	0.612947	0.27418	1.03238	0.564905	1.97854	1.33172
0.67607	0.580245	0.291639	1.11156	0.552424	1.90158	1.35144
0.682313	0.568172	0.313453	1.18624	0.575143	1.84067	1.34888
0.688555	0.540703	0.383627	1.25695	0.650013	1.79493	1.29242
0.694797	0.495831	0.520771	1.32165	0.753149	1.77425	1.21838
0.70104	0.459268	0.527286	1.34675	0.812973	1.80982	1.18336
0.707282	0.453607	0.495322	1.34764	0.860348	1.8331	1.17779
0.713524	0.448669	0.467183	1.34981	0.928795	1.79593	1.13041
0.719766	0.421745	0.419495	1.36095	0.964119	1.82445	1.10739
0.726009	0.426677	0.405515	1.4526	0.968717	1.86011	1.10558
0.732251	0.446071	0.431935	1.5757	0.992395	1.90323	1.07166
0.738493	0.446734	0.43307	1.63954	1.03858	2.00801	1.02012
0.744735	0.528557	0.433102	1.65665	1.07099	2.08111	1.01357
0.750978	0.632197	0.418371	1.63697	1.04777	2.11413	1.09609
0.75722	0.693923	0.379188	1.59329	0.99605	2.11121	1.15309
0.763462	0.79076	0.34282	1.58699	0.934279	2.09809	1.17408
0.769705	0.872643	0.33474	1.59319	0.870059	2.11165	1.18294
0.775947	0.878351	0.395074	1.56783	0.848193	2.17305	1.19887
0.782189	0.822804	0.415306	1.51722	0.854144	2.20379	1.18703
0.788431	0.767011	0.378877	1.43674	0.856926	2.21562	1.16252
0.794674	0.763857	0.324999	1.34969	0.850727	2.21061	1.1949
0.800916	0.792144	0.317124	1.27704	0.800867	2.18419	1.26636
0.807158	0.727059	0.324076	1.28106	0.734242	2.15526	1.31794
0.813401	0.639033	0.312237	1.34173	0.708797	2.13826	1.30325
0.819643	0.603967	0.255355	1.38214	0.720762	2.09147	1.32216
0.825885	0.506264	0.226696	1.3887	0.774056	2.04186	1.35483
0.832127	0.394745	0.218415	1.40574	0.840053	2.00752	1.3672
0.83837	0.355253	0.201903	1.46738	0.895491	1.87336	1.41715
0.844612	0.376239	0.194445	1.55565	0.965554	1.75777	1.50051
0.850854	0.452838	0.20616	1.62004	1.01714	1.68217	1.56241
0.857096	0.571366	0.249922	1.64249	1.04418	1.68027	1.54073
0.863339	0.699545	0.274807	1.62887	1.10596	1.70539	1.48224
0.869581	0.776151	0.280314	1.55802	1.17999	1.74166	1.44601
0.875823	0.799524	0.290166	1.49179	1.19512	1.83117	1.43292
0.882066	0.846459	0.350205	1.51497	1.18523	1.98398	1.40876
0.888308	0.951987	0.458662	1.564	1.19056	2.10867	1.39316
0.89455	1.06172	0.578735	1.5673	1.19089	2.13193	1.41631
0.900792	1.12591	0.658027	1.54188	1.12353	2.28082	1.40442
0.907035	1.1902	0.697263	1.49849	1.04622	2.40813	1.38285
0.913277	1.20336	0.704523	1.45764	1.03133	2.46134	1.43099
0.919519	1.1114	0.697204	1.43861	1.06219	2.43248	1.48721
0.925761	0.973766	0.702357	1.44788	1.09334	2.43271	1.5023
0.932004	0.894483	0.724587	1.48632	1.09705	2.46775	1.4809
0.938246	0.884291	0.808347	1.53034	1.13816	2.48373	1.50682
0.944488	0.825214	0.822398	1.52736	1.18953	2.50053	1.56145
0.950731	0.738783	0.790252	1.51809	1.2462	2.53509	1.6136
0.956973	0.69021	0.789555	1.54323	1.27861	2.57508	1.69373
0.963215	0.665663	0.753401	1.57326	1.28903	2.62146	1.77187
0.969457	0.628215	0.726373	1.60201	1.29413	2.67348	1.76842
0.9757	0.606854	0.750927	1.63367	1.32267	2.67408	1.70857
0.981942	0.664778	0.772392	1.67955	1.29694	2.68773	1.6905
0.988184	0.735205	0.783923	1.72339	1.22626	2.69043	1.73838
0.994426	0.749768	0.777883	1.73842	1.17621	2.66258	1.79594
1.00067	0.729596	0.788197	1.73046	1.20648	2.60702	1.78997
1.00691	0.723921	0.829845	1.75722	1.235	2.52361	1.73805
1.01315	0.710015	0.847801	1.79958	1.15301	2.41663	1.68573
1.0194	0.653734	0.777345	1.80184	1.05937	2.39535	1.57497
1.02564	0.626446	0.736401	1.76693	0.995551	2.3282	1.45049
1.03188	0.618291	0.746946	1.71336	0.976363	2.24575	1.36406
1.03812	0.579087	0.781759	1.6562	0.947594	2.2943	1.31362
1.04436	0.519691	0.821562	1.59215	0.927806	2.2975	1.28375
1.05061	0.515733	0.871793	1.56859	0.934243	2.28294	1.24704
1.05685	0.57756	0.911215	1.58422	0.988074	2.31045	1.19685
1.06309	0.616359	0.831618	1.57791	0.992662	2.38431	1.1933
1.06933	0.628451	0.731051	1.50944	0.977825	2.45163	1.24308
1.07558	0.678273	0.716159	1.42436	1.00296	2.44701	1.23663
1.08182	0.807604	0.736274	1.40173	1.06342	2.43664	1.26623
1.08806	0.903778	0.754478	1.42657	1.14835	2.43056	1.36029
1.0943	0.935521	0.762923	1.49498	1.22483	2.40812	1.44744
1.10055	1.00417	0.767767	1.62439	1.23937	2.35708	1.51747
1.10679	1.04425	0.789318	1.69306	1.2507	2.36308	1.57965
1.11303	1.02076	0.827301	1.70854	1.30008	2.40777	1.62392
1.11927	0.998999	0.844989	1.80312	1.31505	2.3765	1.69646
1.12551	1.04599	0.853001	1.8961	1.31567	2.33619	1.74046
1.13176	1.12682	0.861576	1.95911	1.31298	2.33017	1.72321
1.138	1.15931	0.876163	2.01864	1.31531	2.36419	1.74829
1.14424	1.11679	0.885295	2.05211	1.32678	2.40467	1.75377
1.15048	1.07035	0.881192	2.10803	1.35737	2.46341	1.76355
1.15673	1.06344	0.873115	2.17432	1.38844	2.50181	1.84552
1.16297	1.04517	0.832606	2.13831	1.39324	2.53617	1.88836
1.16921	1.04616	0.728723	2.11173	1.35895	2.55589	1.88341
1.17545	1.05911	0.579654	2.13446	1.32181	2.55281	1.92645
1.18169	1.04535	0.484667	2.10812	1.31555	2.62912	1.90143
1.18794	1.00391	0.462889	2.10669	1.28387	2.68464	1.82742
1.19418	0.966819	0.451359	2.11952	1.20781	2.72198	1.81571
1.20042	0.966853	0.413032	2.09497	1.2634	2.76293	1.81054
1.20666	0.945802	0.37384	2.07477	1.35158	2.78619	1.81129
1.21291	0.913949	0.352503	2.06732	1.36822	2.82098	1.81135
1.21915	0.929928	0.381044	2.05361	1.29756	2.87739	1.77052
1.22539	0.926148	0.432629	2.06443	1.27279	2.9325	1.73994
1.23163	0.911305	0.498722	2.09026	1.31075	2.98322	1.72654
1.23788	0.928109	0.6255	2.1032	1.32278	2.98929	1.67643
1.24412	0.942556	0.703023	2.07134	1.29509	2.99372	1.66638
1.25036	0.946595	0.711614	2.02579	1.28728	2.98384	1.68826
1.2566	0.938258	0.723458	2.02444	1.3733	2.91826	1.69152
1.26284	0.888733	0.758597	2.0763	1.33974	2.91573	1.69311
1.26909	0.882199	0.846527	2.12479	1.24765	2.90334	1.70872
1.27533	0.928488	0.95789	2.11804	1.1924	2.86636	1.77714
1.28157	0.914536	0.93362	2.10075	1.24067	2.84603	1.82201
1.28781	0.906309	0.842652	2.08469	1.32671	2.85239	1.82431
1.29406	0.924992	0.801047	2.05898	1.39644	2.89947	1.81935
1.3003	0.923214	0.760151	2.02138	1.39926	2.96278	1.83702
1.30654	0.918598	0.767818	1.99052	1.39198	2.96747	1.88079
1.31278	0.922107	0.803779	1.98312	1.40083	2.95939	1.91836
1.31902	0.941178	0.792051	1.99612	1.41459	3.0335	1.92717
1.32527	0.987554	0.736146	2.00927	1.42593	3.08834	1.95324
1.33151	1.02122	0.691014	2.02571	1.43317	3.13876	2.01025
1.33775	1.02126	0.718529	2.04961	1.47021	3.19273	2.00393
1.34399	1.01916	0.80421	2.06029	1.50858	3.22969	2.02205
1.35024	1.00537	0.887517	2.0709	1.52207	3.23662	2.04057
1.35648	0.979681	0.949913	2.10673	1.48274	3.23498	2.02398
1.36272	0.967185	0.97354	2.18007	1.50622	3.18304	2.00738
1.36896	0.982913	1.01244	2.25935	1.5536	3.1607	2.01862
1.37521	1.03071	1.10908	2.31121	1.59631	3.17496	2.04855
1.38145	1.1034	1.20539	2.36754	1.6132	3.1445	2.12988
1.38769	1.17563	1.2703	2.42709	1.6729	3.12852	2.22446
1.39393	1.21406	1.27997	2.47453	1.74878	3.12632	2.23687
1.40017	1.23275	1.19025	2.50136	1.71231	3.0827	2.19347
1.40642	1.25295	1.1319	2.50477	1.68256	3.06684	2.14787
1.41266	1.28221	1.12009	2.52155	1.69794	3.04305	2.1756
1.4189	1.30571	1.03206	2.56923	1.6885	2.98371	2.28493
1.42514	1.32174	0.933743	2.56141	1.64807	2.99732	2.35818
1.43139	1.33962	0.857713	2.51553	1.61431	3.0068	2.33803
1.43763	1.34976	0.792161	2.47971	1.64901	2.98905	2.30512
1.44387	1.3048	0.761486	2.40895	1.60661	3.03624	2.24725
1.45011	1.22425	0.771975	2.30362	1.49678	3.06429	2.18201
1.45636	1.18109	0.817969	2.20125	1.38884	3.04082	2.13913
1.4626	1.22464	0.858029	2.14838	1.38101	3.05898	2.1311
1.46884	1.29158	0.83806	2.14252	1.35516	3.06746	2.13356
1.47508	1.31433	0.793681	2.13515	1.29356	3.05534	2.10045
1.48132	1.34623	0.789235	2.08388	1.31115	3.07835	2.0576
1.48757	1.40392	0.816748	2.07713	1.38446	3.10952	2.03528
1.49381	1.46907	0.836189	2.13685	1.48642	3.14534	2.05578
1.50005	1.5138	0.838869	2.19399	1.52174	3.18222	2.12136
1.50629	1.56981	0.847168	2.21468	1.6026	3.17294	2.18911
1.51253	1.67366	0.844001	2.22317	1.71126	3.16087	2.22948
1.51878	1.80213	0.822258	2.25752	1.81112	3.15271	2.21782
1.52502	1.82905	0.80704	2.28863	1.85181	3.15057	2.20825
1.53126	1.78945	0.840573	2.2952	1.85757	3.18307	2.22578
1.5375	1.78438	0.940014	2.27703	1.87192	3.27875	2.23273
1.54375	1.77115	1.02268	2.27629	1.86214	3.35739	2.20691
1.54999	1.73799	1.06286	2.2754	1.8263	3.40826	2.1944
1.55623	1.67678	1.10684	2.27564	1.77016	3.42325	2.27141
1.56247	1.59971	1.10962	2.31076	1.69456	3.46019	2.27607
1.56872	1.51162	1.08854	2.42207	1.63078	3.46911	2.22462
1.57496	1.41896	1.07625	2.55433	1.58091	3.45269	2.23072
1.5812	1.32564	1.05102	2.58834	1.53815	3.55778	2.32218
1.58744	1.27153	1.02837	2.59602	1.5683	3.65567	2.3946
1.59369	1.265	0.998531	2.63955	1.64828	3.71575	2.34902
1.59993	1.26884	0.95026	2.69742	1.67999	3.68276	2.33423
1.60617	1.24927	0.914711	2.71531	1.7135	3.65509	2.37797
1.61241	1.21662	0.91801	2.72627	1.72602	3.64467	2.49032
1.61865	1.21316	0.992192	2.77425	1.68794	3.61803	2.48811
1.6249	1.24138	1.06567	2.78136	1.66655	3.60383	2.53029
1.63114	1.29601	1.09629	2.7094	1.65423	3.62521	2.61439
1.63738	1.34295	1.13331	2.62222	1.64426	3.67416	2.63101
1.64362	1.34977	1.14765	2.6291	1.65982	3.65231	2.6034
1.64986	1.37438	1.1712	2.66607	1.6731	3.61848	2.58057
1.65611	1.43318	1.24028	2.67015	1.68999	3.58582	2.64424
1.66235	1.44044	1.27984	2.65797	1.73602	3.6357	2.67271
1.66859	1.46634	1.30014	2.7321	1.75957	3.66545	2.64229
1.67483	1.52876	1.28965	2.8703	1.75019	3.68755	2.57411
1.68108	1.54664	1.19033	2.92174	1.77722	3.70611	2.5482
1.68732	1.55061	1.1252	2.94598	1.81074	3.75868	2.52978
1.69356	1.55093	1.13398	2.95999	1.86642	3.82242	2.49894
1.6998	1.54923	1.1106	2.98575	1.95257	3.80005	2.50643
1.70605	1.56605	1.1007	3.02711	2.00727	3.75137	2.53432
1.71229	1.54268	1.11297	3.05137	2.02274	3.70935	2.56422
1.71853	1.4687	1.09183	3.03447	1.98501	3.67379	2.55637
1.72477	1.45115	1.02927	3.06473	1.92846	3.63298	2.55888
1.73101	1.45995	1.00941	3.06196	1.90128	3.59597	2.56018
1.73726	1.46721	1.11198	2.94932	1.95012	3.56694	2.53481
1.7435	1.48687	1.21439	2.83201	2.01463	3.54765	2.52472
1.74974	1.52202	1.25152	2.76725	2.0633	3.45403	2.53005
1.75598	1.56785	1.2407	2.78689	2.08085	3.33229	2.52938
1.76223	1.58487	1.27281	2.78752	2.06621	3.34653	2.51775
1.76847	1.59488	1.31554	2.74562	2.04202	3.39439	2.52035
1.77471	1.60363	1.33915	2.69693	1.99968	3.4491	2.57452
1.78095	1.6062	1.39974	2.69365	1.95276	3.48983	2.59233
1.7872	1.63723	1.51893	2.71415	1.91509	3.48448	2.58093
1.79344	1.6874	1.61721	2.77117	1.88689	3.44697	2.56348
1.79968	1.69304	1.59554	2.83013	1.88065	3.37089	2.56504
1.80592	1.72075	1.51872	2.85412	1.88123	3.40017	2.56474
1.81216	1.75227	1.44421	2.83379	1.87062	3.47519	2.56207
1.81841	1.76073	1.42	2.80499	1.79865	3.56456	2.59542
1.82465	1.76643	1.40936	2.78345	1.73252	3.62178	2.61377
1.83089	1.74459	1.41332	2.77216	1.71476	3.63535	2.5878
1.83713	1.71819	1.40507	2.78892	1.77992	3.61147	2.47961
1.84338	1.75721	1.34176	2.82029	1.83815	3.6058	2.48151
1.84962	1.76875	1.24757	2.7985	1.86955	3.66326	2.54896
1.85586	1.71787	1.16443	2.71743	1.87024	3.78285	2.60067
1.8621	1.66935	1.1138	2.71488	1.87327	3.90375	2.65778
1.86834	1.60048	1.13136	2.80693	1.85544	3.95778	2.68899
1.87459	1.52612	1.21091	2.95441	1.83451	3.99771	2.64225
1.88083	1.47794	1.24869	3.06315	1.86937	4.07644	2.62287
1.88707	1.43139	1.23272	3.13566	1.89332	4.09362	2.60846
1.89331	1.41617	1.17261	3.17267	1.89586	4.08427	2.58729
1.89956	1.47575	1.11983	3.2154	1.86677	4.06685	2.59963
1.9058	1.51224	1.09525	3.25883	1.88019	4.12096	2.5924
1.91204	1.521	1.11386	3.30596	1.93419	4.14211	2.59468
1.91828	1.51864	1.15394	3.33567	2.02232	4.09691	2.68207
1.92453	1.56271	1.17099	3.32635	2.03188	4.0481	2.72318
1.93077	1.63609	1.15035	3.26878	2.02126	4.02262	2.75944
1.93701	1.691	1.12552	3.15655	2.02136	4.01287	2.80618
1.94325	1.70733	1.14334	3.05968	2.02095	3.99567	2.82283
1.94949	1.7209	1.1918	3.04299	2.04687	3.98462	2.84599
1.95574	1.70142	1.25615	3.10331	2.1046	3.9907	2.87842
1.96198	1.64007	1.33535	3.09643	2.0709	4.06863	2.89652
1.96822	1.61848	1.39993	3.07249	2.03147	4.07959	2.91344
1.97446	1.65682	1.40713	3.08608	1.99858	4.07547	2.95878
1.98071	1.68481	1.3639	3.16925	1.94731	4.09393	3.00321
1.98695	1.68797	1.3555	3.22409	1.91985	4.09956	3.04706
1.99319	1.68488	1.39654	3.26488	1.90867	4.06918	3.06798
1.99943	1.67803	1.42904	3.3369	1.93145	4.00856	3.0542
2.00568	1.6643	1.46266	3.42796	1.96233	3.94504	3.0721
2.01192	1.67962	1.49895	3.46702	1.99063	3.94803	3.15745
2.01816	1.75244	1.54059	3.39351	2.03433	4.00535	3.17728
2.0244	1.79995	1.62488	3.34932	2.08578	4.04053	3.21735
2.03064	1.79338	1.72026	3.34482	2.12619	4.06088	3.24997
2.03689	1.74485	1.7645	3.37488	2.17496	4.07334	3.20034
2.04313	1.71672	1.79651	3.30886	2.22925	4.09648	3.10771
2.04937	1.71183	1.81054	3.23345	2.28966	4.18831	3.02834
2.05561	1.73003	1.81812	3.18321	2.34308	4.30259	3.02843
2.06185	1.70969	1.79599	3.14853	2.34147	4.36291	3.08479
2.0681	1.68762	1.76069	3.104	2.31962	4.37344	3.09891
2.07434	1.66294	1.74166	3.08255	2.26589	4.35514	3.07202
2.08058	1.62635	1.73543	3.12758	2.19396	4.31246	3.07851
2.08682	1.63284	1.69011	3.17153	2.19725	4.24649	3.09904
2.09307	1.66172	1.62575	3.18333	2.20836	4.18895	3.15533
2.09931	1.69513	1.59019	3.14792	2.16834	4.14961	3.21763
2.10555	1.78978	1.56635	3.13386	2.17816	4.15565	3.2547
2.11179	1.85397	1.56882	3.11821	2.19437	4.18108	3.25631
2.11804	1.82713	1.62946	3.1127	2.17294	4.22612	3.20228
2.12428	1.87559	1.68274	3.09931	2.17488	4.29776	3.20507
2.13052	1.92326	1.68915	3.09038	2.19597	4.33702	3.22244
2.13676	1.92806	1.6482	3.10988	2.23131	4.35589	3.2132
2.14301	1.92701	1.65097	3.14436	2.25082	4.46122	3.21031
2.14925	1.91085	1.68311	3.17073	2.25172	4.57123	3.16256
2.15549	1.90709	1.70231	3.17324	2.23599	4.65949	3.05742
2.16173	1.95919	1.7011	3.20183	2.19965	4.71951	2.99002
2.16797	1.99568	1.78601	3.25748	2.16974	4.72529	2.96043
2.17422	2.02174	1.93966	3.29135	2.17948	4.68288	2.96738
2.18046	2.03545	1.85594	3.29768	2.24128	4.5891	2.96336
2.1867	2.02498	1.73265	3.33365	2.28132	4.5151	2.92585
2.19294	2.02599	1.64968	3.36626	2.29352	4.4883	2.85879
2.19918	2.0541	1.61216	3.29481	2.26034	4.4812	2.77411
2.20543	2.09417	1.53116	3.22298	2.28956	4.45452	2.75371
2.21167	2.1379	1.41187	3.1805	2.3431	4.43863	2.76991
2.21791	2.16112	1.34001	3.16673	2.37737	4.43963	2.78008
2.22415	2.13004	1.44658	3.09169	2.39884	4.46726	2.76946
2.2304	2.0647	1.53833	3.01913	2.38204	4.48118	2.7361
2.23664	1.99057	1.41962	3.02285	2.35202	4.48262	2.67535
2.24288	1.97233	1.418	3.08936	2.28177	4.48437	2.63199
2.24912	1.96394	1.45826	3.12022	2.2506	4.51935	2.61426
2.25537	1.98139	1.51061	3.09711	2.25278	4.57155	2.63859
2.26161	2.03292	1.53452	3.16428	2.23042	4.61559	2.71249
2.26785	2.06819	1.5503	3.22254	2.20805	4.58334	2.75377
2.27409	2.06758	1.58511	3.23516	2.21464	4.53041	2.76423
2.28034	2.00563	1.66094	3.20367	2.20453	4.48996	2.85341
2.28658	1.93579	1.65849	3.21388	2.21766	4.42793	2.91588
2.29282	1.87449	1.61311	3.25034	2.22002	4.40754	2.93934
2.29906	1.84737	1.60373	3.21862	2.2435	4.4622	2.95895
2.3053	1.86374	1.63085	3.15013	2.28902	4.53646	2.99867
2.31155	1.87205	1.69565	3.11654	2.33352	4.56535	3.03871
2.31779	1.85243	1.77129	3.16703	2.41049	4.566	3.02355
2.32403	1.84951	1.83023	3.15868	2.57645	4.5795	2.96613
2.33027	1.85405	1.87107	3.12667	2.62129	4.584	2.91441
2.33651	1.8637	1.88156	3.12917	2.57855	4.57904	2.87664
2.34276	1.895	1.82264	3.19483	2.53995	4.60096	2.80383
2.349	1.93473	1.74134	3.22611	2.56916	4.62497	2.77992
2.35524	2.00072	1.69493	3.22802	2.61189	4.61491	2.81849
2.36149	2.08214	1.73258	3.33567	2.60514	4.57827	2.84565
2.36773	2.10646	1.74253	3.41029	2.61603	4.57504	2.85643
2.37397	2.09599	1.70139	3.40653	2.58975	4.58495	2.87047
2.38021	2.0718	1.71312	3.36053	2.47611	4.57337	2.92118
2.38645	2.03148	1.74908	3.36238	2.38734	4.53913	2.97557
2.3927	2.01328	1.7754	3.40575	2.35026	4.54698	3.03004
2.39894	2.03122	1.75908	3.46358	2.36735	4.60055	3.07911
2.40518	2.03848	1.80307	3.48227	2.46004	4.60533	3.13368
2.41142	2.0317	1.85466	3.50909	2.55576	4.64461	3.19318
2.41766	2.01665	1.80164	3.55942	2.66399	4.71907	3.24252
2.42391	1.96079	1.8094	3.53121	2.71278	4.75181	3.31048
2.43015	1.94702	1.8761	3.52356	2.72704	4.728	3.35389
2.43639	1.97909	1.94935	3.5704	2.73203	4.71026	3.33917
2.44263	2.00874	1.90546	3.57587	2.82812	4.77733	3.3372
2.44888	2.03742	1.87029	3.54776	2.84428	4.86893	3.35245
2.45512	2.06888	1.91385	3.48817	2.80913	4.9174	3.38368
2.46136	2.10146	1.96875	3.42072	2.73035	4.90301	3.36718
2.4676	2.14796	1.95271	3.38446	2.67319	4.89501	3.31939
2.47384	2.16637	1.9302	3.37522	2.60909	4.878	3.26683
2.48009	2.13381	2.02597	3.38653	2.50043	4.84664	3.29683
2.48633	2.14657	2.01687	3.41551	2.42195	4.83545	3.28533
2.49257	2.13953	1.95622	3.43119	2.38533	4.85019	3.24606
2.49882	2.09096	1.95867	3.41081	2.42299	4.85815	3.32687
2.50506	2.08025	1.97477	3.42825	2.44454	4.7947	3.36638
2.5113	2.07139	1.96584	3.45293	2.48957	4.76374	3.38199
2.51754	2.05703	1.92562	3.49801	2.54074	4.81194	3.38975
2.52378	2.03248	1.92281	3.64505	2.5964	4.918	3.40914
2.53003	2.02104	1.96246	3.75276	2.59466	5.01381	3.43096
2.53627	2.0359	2.03016	3.74967	2.56487	5.08588	3.48855
2.54251	2.09827	1.97182	3.6821	2.55997	5.16885	3.41841
2.54875	2.12054	1.95002	3.65612	2.5967	5.22465	3.38166
2.55499	2.17004	1.96744	3.67838	2.6474	5.26038	3.38137
2.56124	2.31357	1.92491	3.68071	2.71715	5.30686	3.30106
2.56748	2.42466	1.95009	3.67392	2.68195	5.35902	3.24211
2.57372	2.50073	2.00741	3.69699	2.64942	5.37973	3.19642
2.57996	2.53028	2.01037	3.76382	2.66783	5.36817	3.12079
2.58621	2.52395	2.02364	3.67225	2.68459	5.31063	3.11643
2.59245	2.51832	1.98212	3.56033	2.70409	5.26982	3.14004
2.59869	2.52451	1.84052	3.52641	2.72428	5.26621	3.15834
2.60493	2.55582	1.80519	3.54242	2.71937	5.28411	3.20019
2.61118	2.60897	1.79933	3.50731	2.70382	5.34148	3.2602
2.61742	2.63357	1.80731	3.42288	2.66403	5.39785	3.36076
2.62366	2.54398	1.80662	3.47047	2.63467	5.39173	3.4984
2.6299	2.47555	1.78367	3.50317	2.6322	5.35034	3.60682
2.63614	2.4127	1.77642	3.48448	2.61645	5.2908	3.65984
2.64239	2.35167	1.85724	3.46478	2.66358	5.2162	3.75148
2.64863	2.35482	1.89875	3.47048	2.73067	5.13904	3.83782
2.65487	2.37511	1.91616	3.51665	2.80256	5.06146	3.92559
2.66111	2.37279	1.98021	3.68196	2.88374	4.9777	3.94195
2.66736	2.33011	2.00273	3.73834	2.90456	4.87439	3.97808
2.6736	2.27946	1.99267	3.7683	2.92059	4.7711	4.01586
2.67984	2.24316	1.96585	3.8625	2.96475	4.69366	4.01755
2.68608	2.25252	1.97407	3.82147	2.92694	4.65477	3.95556
2.69232	2.26918	1.97311	3.77332	2.9157	4.64658	3.9192
2.69857	2.29095	1.93403	3.77647	2.90675	4.64294	4.00707
2.70481	2.28197	1.82882	3.8012	2.75685	4.62634	4.04698
2.71105	2.29668	1.78157	3.85215	2.65728	4.61515	4.0424
2.71729	2.34045	1.79977	3.87506	2.60125	4.6054	3.98715
2.72354	2.38153	1.77556	3.82718	2.59152	4.58674	3.96878
2.72978	2.42005	1.76055	3.86307	2.65633	4.55618	3.94749
2.73602	2.46632	1.76919	3.92014	2.70554	4.52077	3.92142
2.74226	2.53292	1.88351	3.91424	2.63171	4.48865	3.91027
2.74851	2.53838	1.92246	3.94458	2.64334	4.4892	3.91145
2.75475	2.51356	1.91472	3.99077	2.68238	4.51995	3.89573
2.76099	2.48711	1.92642	4.05852	2.7164	4.55908	3.75854
2.76723	2.49218	1.99289	4.02787	2.78601	4.58437	3.6742
2.77347	2.46512	2.03916	3.97248	2.8307	4.60717	3.63288
2.77972	2.44657	1.99495	3.96417	2.85029	4.64108	3.65581
2.78596	2.47416	2.08112	3.93518	2.73814	4.69701	3.65127
2.7922	2.45668	2.18586	3.90597	2.63105	4.73422	3.63952
2.79844	2.39508	2.24204	3.85298	2.55636	4.7433	3.62952
2.80469	2.35974	2.14868	3.82223	2.63615	4.74655	3.60468
2.81093	2.41335	2.16433	3.8185	2.60773	4.73706	3.63211
2.81717	2.49278	2.28473	3.82489	2.55167	4.71384	3.74525
2.82341	2.56017	2.39011	3.78906	2.50915	4.68419	3.83547
2.82965	2.64411	2.37011	3.78516	2.53127	4.68125	3.86916
2.8359	2.69271	2.28646	3.82296	2.53412	4.69698	3.84117
2.84214	2.69672	2.28353	3.82221	2.46494	4.70016	3.8199
2.84838	2.71138	2.20176	3.81176	2.58492	4.72159	3.85806
2.85462	2.7507	2.13888	3.80862	2.67682	4.77459	3.92963
2.86087	2.77862	2.2064	3.78725	2.6903	4.83223	3.92183
2.86711	2.81299	2.26543	3.79164	2.65672	4.86005	3.92298
2.87335	2.78211	2.28177	3.82748	2.6403	4.85703	3.89227
2.87959	2.69488	2.25785	3.81337	2.63547	4.84465	3.80177
2.88584	2.63376	2.15073	3.81491	2.63199	4.83715	3.80127
2.89208	2.61457	2.09524	3.81694	2.66675	4.82551	3.85967
2.89832	2.62021	2.09128	3.8234	2.73714	4.80855	3.98742
2.90456	2.58886	2.12046	3.88763	2.76325	4.78946	3.97569
2.9108	2.54043	2.18564	3.94054	2.69924	4.73429	3.92421
2.91705	2.54385	2.25264	3.92145	2.66995	4.65108	3.87883
2.92329	2.61181	2.24733	3.9483	2.72861	4.5608	3.92757
2.92953	2.5451	2.29479	3.95925	2.766	4.50293	3.96664
2.93577	2.49627	2.33018	3.96999	2.81139	4.49019	3.9888
2.94202	2.52105	2.27382	4.00823	2.87149	4.49626	3.92256
2.94826	2.54995	2.32472	4.09551	2.92461	4.47868	3.86278
2.9545	2.54147	2.41104	4.21787	2.91956	4.45496	3.81316
2.96074	2.49564	2.50467	4.20979	2.912	4.45715	3.72268
2.96699	2.47534	2.56357	4.13498	2.97015	4.43793	3.74031
2.97323	2.48967	2.60237	4.04644	2.99144	4.39379	3.76559
2.97947	2.52064	2.62485	4.02042	2.98959	4.36787	3.7685
2.98571	2.46082	2.60798	4.07836	3.01099	4.38092	3.71941
2.99195	2.52691	2.56575	4.15608	3.01562	4.39941	3.67982
2.9982	2.63956	2.51409	4.20671	3.02279	4.38729	3.68925
3.00444	2.69558	2.45836	4.21364	3.06482	4.33974	3.83917
3.01068	2.77016	2.37352	4.16762	3.03913	4.29922	3.9436
3.01692	2.8408	2.31541	4.09446	3.01162	4.26685	3.97319
3.02317	2.87759	2.4048	4.12806	3.03322	4.21757	3.97683
3.02941	2.94677	2.3583	4.19146	3.0621	4.1991	3.97454
3.03565	2.94665	2.26408	4.2794	3.08518	4.1986	3.97896
3.04189	2.88443	2.23104	4.33257	3.09156	4.17941	3.93001
3.04813	2.90801	2.18153	4.3233	3.10831	4.1686	3.91575
3.05438	2.87205	2.15815	4.27045	3.113	4.16433	3.90683
3.06062	2.79576	2.18042	4.16705	3.08608	4.1542	3.88398
3.06686	2.74912	2.2319	4.18942	3.00813	4.15077	3.78174
3.0731	2.70148	2.27499	4.23231	3.00926	4.1759	3.68525
3.07935	2.68343	2.2805	4.1889	2.97212	4.21267	3.65449
3.08559	2.66072	2.10778	4.17208	2.82517	4.19561	3.6963
3.09183	2.63343	2.12763	4.15891	2.75132	4.15506	3.74976
3.09807	2.61311	2.21327	4.15026	2.73777	4.13085	3.78905
3.10432	2.56957	2.1246	4.1928	2.78203	4.09409	3.82259
3.11056	2.54501	2.11289	4.22369	2.77821	4.04757	3.82638
3.1168	2.54259	2.09661	4.24243	2.79741	4.00008	3.7988
3.12304	2.54914	2.00335	4.32887	2.82293	3.94542	3.82516
3.12928	2.59604	2.0386	4.36124	2.8402	3.90639	3.89395
3.13553	2.60566	2.08861	4.36614	2.8594	3.86986	3.99058
3.14177	2.57263	2.11964	4.36865	2.88646	3.81913	3.98741
3.14801	2.62798	2.20297	4.36764	2.91953	3.80593	3.94243
3.15425	2.64857	2.27222	4.37355	2.9309	3.81591	3.88042
3.1605	2.65642	2.36608	4.39455	2.92186	3.81157	3.85517
3.16674	2.81098	2.52325	4.39561	2.84762	3.77601	3.91796
3.17298	2.89964	2.64857	4.37722	2.79873	3.72242	4.02462
3.17922	2.94897	2.76122	4.30991	2.79417	3.68759	4.10188
3.18547	2.98917	2.78962	4.27232	2.85122	3.65238	4.06561
3.19171	2.93863	2.75073	4.26997	2.85014	3.58426	4.01103
3.19795	2.87542	2.72444	4.30928	2.86294	3.50244	4.01025
3.20419	2.85057	2.77097	4.36913	2.93321	3.4545	4.08278
3.21043	2.82423	2.80861	4.38259	3.03847	3.39739	4.143
3.21668	2.82841	2.76388	4.35491	3.09536	3.30485	4.15734
3.22292	2.85415	2.59918	4.34342	3.10716	3.2201	4.18817
3.22916	2.80046	2.4742	4.30124	3.15264	3.19637	4.15079
3.2354	2.76352	2.35133	4.27226	3.20199	3.20033	4.05558
3.24165	2.73991	2.26127	4.36426	3.24208	3.17336	4.03852
3.24789	2.78283	2.33172	4.42891	3.13486	3.1856	4.0634
3.25413	2.85277	2.34407	4.44819	3.09929	3.21057	4.07143
3.26037	2.9092	2.30125	4.38307	3.06362	3.19145	3.99159
3.26661	2.90941	2.21794	4.42254	2.98054	3.15882	3.94254
3.27286	2.93601	2.19431	4.48648	2.90975	3.15452	3.93204
3.2791	2.9797	2.25452	4.53462	2.89525	3.19324	3.95595
3.28534	2.98215	2.43515	4.52071	2.98442	3.26169	3.92587
3.29158	2.9706	2.57045	4.53259	3.05375	3.3224	3.92669
3.29783	2.95507	2.64533	4.56166	3.04925	3.35124	3.98892
3.30407	2.90975	2.65049	4.59397	2.96975	3.37992	3.9964
3.31031	2.84769	2.7028	4.56244	3.0234	3.36974	4.01944
3.31655	2.84474	2.77	4.52363	3.0546	3.34314	4.07936
3.32279	2.90714	2.81594	4.59314	3.04559	3.34385	4.09319
3.32904	2.95781	2.92822	4.6254	3.16256	3.32342	4.07619
3.33528	2.93153	2.90994	4.66262	3.28341	3.28884	4.05311
3.34152	2.86394	2.78164	4.69497	3.36534	3.24356	4.05664
3.34776	2.80502	2.75853	4.69301	3.31555	3.12935	4.06481
3.35401	2.72599	2.70728	4.71582	3.25473	2.97975	4.07336
3.36025	2.66989	2.65255	4.81648	3.21684	2.85801	4.09035
3.36649	2.72362	2.68185	4.78121	3.23387	2.75451	4.18318
3.37273	2.71475	2.66883	4.78196	3.26828	2.65514	4.25574
3.37898	2.65525	2.67572	4.81906	3.3225	2.55751	4.22752
3.38522	2.53335	2.70611	4.79569	3.33792	2.48778	4.2819
3.39146	2.47904	2.64252	4.77548	3.25203	2.45135	4.35169
3.3977	2.45533	2.67735	4.78626	3.163	2.43606	4.43092
3.40394	2.46828	2.81933	4.76985	3.09041	2.42171	4.45657
3.41019	2.58135	2.76303	4.8311	3.05654	2.44787	4.4751
3.41643	2.69148	2.80988	4.88917	3.03741	2.48449	4.49365
3.42267	2.76764	2.9368	4.79164	3.02089	2.46611	4.49807
3.42891	2.70335	2.96293	4.78998	3.01466	2.44128	4.46488
3.43515	2.66301	2.94187	4.7972	2.94119	2.46106	4.45008
3.4414	2.66002	2.90074	4.76	2.8497	2.51491	4.51821
3.44764	2.75698	2.83277	4.81496	2.86975	2.53721	4.54491
3.45388	2.85383	2.7771	4.82733	2.88109	2.49817	4.53177
3.46012	2.93892	2.69427	4.71716	2.88317	2.42138	4.46596
3.46637	2.98762	2.57823	4.67869	2.88703	2.37985	4.49399
3.47261	2.92209	2.48164	4.63059	2.92743	2.32739	4.55272
3.47885	2.86215	2.37606	4.59239	2.97212	2.26517	4.60917
3.48509	2.84704	2.28688	4.68275	3.00305	2.26999	4.63989
3.49134	2.96361	2.30729	4.68865	3.03272	2.25273	4.63179
3.49758	3.07266	2.30264	4.62996	3.08845	2.1796	4.58313
3.50382	3.14159	2.28226	4.68077	3.15827	2.13994	4.54311
3.51006	3.14821	2.36889	4.61631	3.17084	2.12189	4.53398
3.51631	3.1062	2.50585	4.56019	3.16783	2.13386	4.55312
3.52255	3.02401	2.66593	4.65936	3.17328	2.18264	4.57601
3.52879	2.98662	2.84308	4.69103	3.26728	2.21338	4.56259
3.53503	3.04044	2.93766	4.6822	3.28966	2.22309	4.53487
3.54127	3.11373	2.95632	4.6637	3.29044	2.21553	4.48685
3.54752	3.07797	2.93821	4.62703	3.34319	2.16515	4.40955
3.55376	2.98813	2.95433	4.64306	3.33356	2.12189	4.35304
3.56	2.90408	3.00461	4.67555	3.31712	2.10437	4.36857
3.56624	2.84636	3.05353	4.69767	3.33907	2.04102	4.33604
3.57248	2.77771	3.09179	4.745	3.47359	1.98405	4.28915
3.57873	2.73782	3.05229	4.77031	3.5827	1.95767	4.26361
3.58497	2.72367	2.93111	4.719	3.61607	1.89338	4.29927
3.59121	2.80682	2.76498	4.72225	3.55986	1.81628	4.31238
3.59746	2.81879	2.76839	4.73604	3.53011	1.76523	4.29263
3.6037	2.77258	2.85191	4.71729	3.50338	1.76961	4.30561
3.60994	2.84201	2.87408	4.76529	3.41907	1.81006	4.34056
3.61618	2.90537	2.83951	4.85904	3.45284	1.85881	4.36234
3.62242	2.9609	2.80364	4.9322	3.52391	1.86798	4.39894
3.62867	2.99111	2.75738	4.96753	3.50917	1.853	4.44831
3.63491	3.0137	2.67734	4.99497	3.39076	1.79889	4.47952
3.64115	3.04546	2.62534	4.99615	3.30109	1.72179	4.47637
3.64739	3.09795	2.59364	5.0197	3.27632	1.66905	4.46153
3.65363	3.00442	2.57348	5.06677	3.21116	1.64652	4.45139
3.65988	2.94097	2.5709	5.14174	3.1899	1.64126	4.43566
3.66612	2.9387	2.6255	5.22808	3.2427	1.59855	4.45656
3.67236	2.92093	2.60931	5.1799	3.29759	1.50406	4.50418
3.6786	2.94301	2.55834	5.07382	3.29845	1.38184	4.54929
3.68485	3.01321	2.50734	5.02281	3.29945	1.31826	4.5256
3.69109	3.00593	2.48732	4.93631	3.3517	1.33361	4.54926
3.69733	3.02549	2.47087	4.87998	3.44443	1.3912	4.63735
3.70357	3.06284	2.47825	4.91984	3.56025	1.38415	4.66733
3.70982	3.04364	2.54135	4.97439	3.57973	1.34963	4.69566
3.71606	3.03158	2.59272	5.00792	3.66375	1.32546	4.74132
3.7223	3.03137	2.57083	4.99683	3.7732	1.34077	4.78418
3.72854	3.08292	2.46879	4.95668	3.8465	1.37649	4.73437
3.73479	3.09326	2.51036	4.99791	3.91695	1.4081	4.66901
3.74103	3.07267	2.5756	5.12883	3.97285	1.41767	4.66764
3.74727	3.03736	2.62822	5.22025	4.0326	1.39455	4.65638
3.75351	3.07251	2.74194	5.2887	4.0338	1.33324	4.60806
3.75975	3.10496	2.79798	5.33049	3.98047	1.28558	4.53318
3.766	3.15011	2.79844	5.39007	3.90046	1.36897	4.53079
3.77224	3.19744	2.87311	5.34272	3.91778	1.46554	4.51141
3.77848	3.26286	2.9221	5.25711	3.89651	1.4577	4.46782
3.78472	3.31663	2.94988	5.20516	3.82197	1.36471	4.44446
3.79096	3.28177	3.00195	5.23361	3.75177	1.25541	4.45199
3.79721	3.33931	3.03866	5.23836	3.70673	1.17405	4.46204
3.80345	3.39156	3.06744	5.21012	3.65923	1.15273	4.44426
3.80969	3.33453	3.07848	5.19432	3.57596	1.13636	4.44284
3.81593	3.36426	3.03818	5.2018	3.58635	1.11073	4.44569
3.82218	3.36937	3.06393	5.2327	3.64468	1.0467	4.45275
3.82842	3.30397	3.15169	5.23249	3.64772	0.901058	4.4366
3.83466	3.27994	3.10041	5.28669	3.63479	0.779214	4.41505
3.8409	3.27947	3.05705	5.35701	3.6395	0.777484	4.40615
3.84715	3.32965	3.03981	5.41023	3.67937	0.754149	4.43458
3.85339	3.28262	3.05535	5.43232	3.67281	0.728715	4.45762
3.85963	3.17984	3.08109	5.42931	3.65384	0.706162	4.44277
3.86587	3.084	3.10519	5.30516	3.64098	0.64539	4.43791
3.87211	3.09141	3.07486	5.24511	3.62575	0.612994	4.42034
3.87836	3.05645	3.04698	5.20517	3.58791	0.62676	4.37516
3.8846	3.04703	2.9932	5.14723	3.5514	0.629426	4.34995
3.89084	3.13554	2.88152	5.04841	3.53943	0.657684	4.32982
3.89708	3.20217	2.84449	4.99595	3.54201	0.687744	4.31447
3.90333	3.22708	2.84879	5.04242	3.54322	0.674398	4.37743
3.90957	3.21117	2.86419	5.07924	3.49353	0.703517	4.38421
3.91581	3.23206	2.81925	5.07723	3.46435	0.720952	4.36686
3.92205	3.29145	2.76323	5.04152	3.45132	0.674456	4.36303
3.92829	3.42822	2.7418	5.10086	3.45082	0.690055	4.37749
3.93454	3.50094	2.80274	5.14296	3.46791	0.709192	4.40493
3.94078	3.56105	2.853	5.17716	3.46639	0.683992	4.42305
3.94702	3.60801	2.89858	5.17067	3.41771	0.661522	4.36135
3.95326	3.60186	2.97604	5.15946	3.44006	0.640515	4.31193
3.95951	3.56809	2.99734	5.12298	3.46679	0.621619	4.28002
3.96575	3.49172	3.00007	5.05025	3.46314	0.548449	4.17689
3.97199	3.4388	3.04297	4.97803	3.49973	0.474843	4.106
3.97823	3.44994	3.06275	4.92696	3.55574	0.453407	4.07555
3.98448	3.43157	3.04083	4.93998	3.61221	0.487983	4.06112
3.99072	3.3958	2.98447	4.95228	3.64034	0.467807	4.02215
3.99696	3.34739	2.89544	4.94688	3.65152	0.421999	4.00311
4.0032	3.28493	2.87989	4.91851	3.66593	0.403364	4.04712
4.00945	3.23257	2.96296	5.04782	3.71039	0.368123	4.13073
4.01569	3.18145	3.11441	5.16431	3.77785	0.294709	4.1989
4.02193	3.18873	3.25632	5.23054	3.85849	0.21067	4.23226
4.02817	3.24489	3.34468	5.28471	3.86354	0.212395	4.2737
4.03441	3.33025	3.34309	5.34027	3.82615	0.214647	4.30581
4.04066	3.38458	3.37135	5.38943	3.79763	0.147634	4.32321
4.0469	3.37676	3.42237	5.47397	3.81108	0.091017	4.31549
4.05314	3.28652	3.46284	5.48523	3.8158	0.072704	4.31772
4.05938	3.2972	3.47291	5.47744	3.79054	0.090578	4.324
4.06562	3.35663	3.41412	5.51089	3.73103	0.057027	4.26266
4.07187	3.41796	3.29284	5.41697	3.70728	0.047329	4.18989
4.07811	3.44362	3.17751	5.39844	3.63969	0.061522	4.13179
4.08435	3.45111	3.09236	5.5132	3.54755	0.055364	4.09518
4.09059	3.45221	3.01551	5.47922	3.5098	0.045759	4.04248
4.09684	3.45305	3.07298	5.49643	3.52035	0.047579	3.9808
4.10308	3.48997	3.11539	5.5781	3.54029	0.03048	3.91302
4.10932	3.53913	3.11397	5.55002	3.5087	0.05033	3.87054
4.11556	3.5644	3.11694	5.62108	3.53825	0.047769	3.81725
4.12181	3.53337	3.15527	5.74174	3.62504	-0.046211	3.75987
4.12805	3.46379	3.1963	5.75874	3.74722	-0.095313	3.72397
4.13429	3.4204	3.23885	5.79044	3.79292	-0.099608	3.70582
4.14053	3.3979	3.19931	5.78846	3.80613	-0.03182	3.69865
4.14677	3.38159	3.1548	5.73907	3.83157	0.018116	3.68062
4.15302	3.3659	3.15842	5.78109	3.8986	0.007599	3.6425
4.15926	3.26977	3.07738	5.76884	3.95167	-0.047111	3.61654
4.1655	3.20041	3.01402	5.68566	3.98593	-0.034631	3.65539
4.17174	3.2344	3.03776	5.5982	3.98347	-0.01954	3.71027
4.17799	3.22273	3.01748	5.48881	3.95133	0.010076	3.73095
4.18423	3.24225	2.95665	5.39875	3.91489	0.015004	3.69077
4.19047	3.3325	2.86609	5.36757	3.89377	0.036168	3.70159
4.19671	3.30863	2.80089	5.36625	3.86997	0.060439	3.70944
4.20296	3.27729	2.78654	5.3849	3.82835	0.021228	3.68098
4.2092	3.24648	2.80125	5.30966	3.78695	-0.006704	3.6728
4.21544	3.25979	2.81441	5.27023	3.775	-0.039261	3.67226
4.22168	3.29691	2.81646	5.25531	3.7636	-0.09641	3.65341
4.22792	3.33306	2.79745	5.24278	3.72542	-0.126881	3.61088
4.23417	3.40781	2.75992	5.29501	3.73665	-0.164598	3.5771
4.24041	3.50547	2.77404	5.35434	3.77638	-0.203168	3.57163
4.24665	3.54965	2.86004	5.39225	3.83687	-0.168826	3.60576
4.25289	3.55088	3.0212	5.41762	3.82846	-0.161664	3.56626
4.25914	3.61571	3.16425	5.43057	3.8493	-0.203293	3.48812
4.26538	3.67946	3.2418	5.45105	3.91075	-0.296961	3.42697
4.27162	3.70986	3.24555	5.52679	3.91672	-0.36397	3.39133
4.27786	3.74518	3.23447	5.5987	3.88984	-0.370844	3.3646
4.28411	3.78766	3.25308	5.66016	3.87142	-0.290242	3.31251
4.29035	3.82477	3.29227	5.72762	3.87311	-0.256259	3.27514
4.29659	3.72243	3.27391	5.78563	3.8735	-0.274872	3.24047
4.30283	3.64664	3.24634	5.8358	3.85	-0.354975	3.19373
4.30907	3.58471	3.21894	5.87245	3.79833	-0.446293	3.15812
4.31532	3.46737	3.1959	5.89433	3.81846	-0.534288	3.14094
4.32156	3.35852	3.18338	5.8911	3.85658	-0.572895	3.12618
4.3278	3.28629	3.20167	5.90518	3.87524	-0.569283	3.16181
4.33404	3.2887	3.24087	5.88997	3.96795	-0.554188	3.17853
4.34028	3.3009	3.26764	5.86379	4.03242	-0.523884	3.18853
4.34653	3.30171	3.29261	5.83663	4.03742	-0.547372	3.22681
4.35277	3.26503	3.36215	5.80682	4.11498	-0.552514	3.24514
4.35901	3.2917	3.38026	5.78325	4.21723	-0.537541	3.25429
4.36525	3.31961	3.38228	5.77817	4.29066	-0.525427	3.25643
4.3715	3.32768	3.42489	5.80917	4.277	-0.488823	3.22749
4.37774	3.41243	3.45234	5.85211	4.26483	-0.4649	3.20584
4.38398	3.48802	3.418	5.87868	4.28977	-0.535419	3.19742
4.39022	3.53914	3.33801	5.84657	4.33267	-0.576853	3.15407
4.39647	3.55606	3.26617	5.8503	4.28928	-0.606596	3.1004
4.40271	3.50697	3.22572	5.87797	4.22795	-0.642247	3.05342
4.40895	3.44457	3.17535	5.90274	4.19633	-0.725226	3.01139
4.41519	3.44501	3.03744	5.91862	4.1413	-0.825516	2.95895
4.42143	3.42278	3.00842	5.91399	4.0777	-0.891315	2.91554
4.42768	3.40588	3.06738	5.89155	4.02329	-0.936155	2.94465
4.43392	3.38787	3.0837	5.79791	4.03148	-0.980021	2.96729
4.44016	3.34372	3.03642	5.71903	3.99226	-1.00786	2.9781
4.4464	3.31126	3.00336	5.68309	3.89187	-0.972646	3.02764
4.45265	3.29661	3.05122	5.66918	3.78568	-0.925432	3.07993
4.45889	3.29327	3.16692	5.63962	3.75985	-0.871043	3.13011
4.46513	3.31098	3.26488	5.59078	3.79255	-0.876043	3.18993
4.47137	3.33662	3.30423	5.62278	3.82663	-0.85055	3.23152
4.47762	3.29632	3.33839	5.65026	3.86481	-0.839649	3.24172
4.48386	3.24573	3.35246	5.65897	3.90836	-0.885485	3.21553
4.4901	3.2105	3.34876	5.71411	3.91233	-0.875324	3.2029
4.49634	3.32222	3.34157	5.76033	3.89889	-0.859763	3.20214
4.50258	3.36266	3.36638	5.77891	3.92018	-0.907004	3.17394
4.50883	3.3343	3.4073	5.79251	4.00308	-0.910639	3.10905
4.51507	3.32297	3.429	5.78507	4.10016	-0.960205	3.04427
4.52131	3.36702	3.40283	5.78301	4.1876	-1.1172	2.99402
4.52755	3.42021	3.3634	5.79879	4.28745	-1.23165	2.97477
4.5338	3.39969	3.35268	5.77932	4.31671	-1.30206	2.93908
4.54004	3.41222	3.40272	5.80896	4.2791	-1.33771	2.89619
4.54628	3.44481	3.44592	5.90299	4.2562	-1.34922	2.88144
4.55252	3.49117	3.40923	5.91964	4.30644	-1.37627	2.81337
4.55877	3.43609	3.39138	5.97191	4.39241	-1.3832	2.7554
4.56501	3.41992	3.40459	6.06678	4.46682	-1.30028	2.73178
4.57125	3.43608	3.40749	6.21358	4.48808	-1.31807	2.6897
4.57749	3.50333	3.41363	6.30131	4.49538	-1.35574	2.63663
4.58373	3.52099	3.39779	6.32445	4.50178	-1.31628	2.58599
4.58998	3.51385	3.34677	6.38427	4.50276	-1.23657	2.46609
4.59622	3.52324	3.35141	6.42433	4.54842	-1.17319	2.38161
4.60246	3.56905	3.35985	6.41758	4.57944	-1.19995	2.35362
4.6087	3.63429	3.35165	6.31425	4.58687	-1.20405	2.36803
4.61494	3.64061	3.36629	6.2116	4.59216	-1.22369	2.35278
4.62119	3.64799	3.3829	6.12316	4.57348	-1.26436	2.31313
4.62743	3.67608	3.39174	6.06436	4.5092	-1.32505	2.29338
4.63367	3.71862	3.36842	5.94521	4.47989	-1.31923	2.29647
4.63992	3.6542	3.33522	5.87425	4.47752	-1.26265	2.30121
4.64616	3.59671	3.3578	5.85314	4.47603	-1.23668	2.33378
4.6524	3.60251	3.43704	5.82569	4.45587	-1.29939	2.37504
4.65864	3.59902	3.45139	5.82524	4.45689	-1.36792	2.39614
4.66488	3.57881	3.43789	5.87384	4.47418	-1.33844	2.40323
4.67113	3.58052	3.48498	5.93876	4.50109	-1.32663	2.35887
4.67737	3.53079	3.52602	5.98838	4.50762	-1.2918	2.35419
4.68361	3.4726	3.54773	6.00514	4.5254	-1.18675	2.43633
4.68985	3.42172	3.59279	6.02244	4.60715	-1.19493	2.44421
4.69609	3.35995	3.64247	6.02922	4.66155	-1.26468	2.42459
4.70234	3.35374	3.6597	6.032	4.65768	-1.36875	2.41814
4.70858	3.36103	3.64835	6.04521	4.60764	-1.45125	2.38286
4.71482	3.35049	3.5935	6.02971	4.5605	-1.52304	2.39413
4.72106	3.41665	3.61156	5.99587	4.53061	-1.58819	2.43767
4.72731	3.44966	3.6771	5.96382	4.49944	-1.53865	2.44258
4.73355	3.38874	3.66485	6.00885	4.47217	-1.4871	2.42007
4.73979	3.43319	3.63505	6.05078	4.46024	-1.48113	2.35634
4.74603	3.50056	3.59768	6.029	4.45374	-1.63567	2.23486
4.75228	3.5727	3.52814	6.12126	4.43872	-1.68686	2.17317
4.75852	3.62451	3.52414	6.21066	4.39804	-1.6791	2.14554
4.76476	3.66696	3.52148	6.24065	4.35849	-1.59043	2.11145
4.771	3.70809	3.45881	6.29127	4.3754	-1.54155	2.10354
4.77724	3.73774	3.46168	6.33279	4.3965	-1.49597	2.08534
4.78349	3.69784	3.44886	6.34503	4.43029	-1.44518	2.04307
4.78973	3.64505	3.37484	6.32664	4.52609	-1.54906	2.03394
4.79597	3.65913	3.31343	6.30554	4.56351	-1.64997	2.03993
4.80221	3.66136	3.30127	6.35156	4.56527	-1.72168	2.03063
4.80846	3.63813	3.30991	6.50742	4.59715	-1.75011	2.04656
4.8147	3.59415	3.28599	6.41872	4.63498	-1.76716	2.09575
4.82094	3.57685	3.27197	6.31478	4.68515	-1.78478	2.14924
4.82718	3.55832	3.32338	6.31767	4.73406	-1.82648	2.18032
4.83343	3.54697	3.41205	6.30975	4.73854	-1.82007	2.16352
4.83967	3.47616	3.46837	6.31412	4.72932	-1.80099	2.13202
4.84591	3.43242	3.49241	6.34526	4.71435	-1.82628	2.11299
4.85215	3.40527	3.50772	6.35371	4.6761	-1.8466	2.05747
4.85839	3.38574	3.58119	6.33821	4.67977	-1.88023	2.01853
4.86464	3.38526	3.65541	6.31081	4.68516	-1.90234	2.04891
4.87088	3.40486	3.65084	6.28024	4.62094	-1.93421	2.02101
4.87712	3.47741	3.61974	6.33006	4.51009	-1.97265	1.94309
4.88336	3.5068	3.56973	6.39845	4.42357	-1.98351	1.86652
4.88961	3.48406	3.51834	6.41396	4.39851	-2.08638	1.80946
4.89585	3.45616	3.47705	6.42794	4.41259	-2.16518	1.7428
4.90209	3.48342	3.44608	6.44979	4.43344	-2.19153	1.66694
4.90833	3.52303	3.44667	6.4821	4.44485	-2.19491	1.64797
4.91458	3.53574	3.4816	6.48933	4.42848	-2.20091	1.65715
4.92082	3.52566	3.45976	6.48713	4.40693	-2.23094	1.62785
4.92706	3.49716	3.40359	6.49699	4.40958	-2.26085	1.54213
4.9333	3.43775	3.41118	6.4876	4.45998	-2.21338	1.51171
4.93954	3.31994	3.45281	6.46357	4.49751	-2.13632	1.5482
4.94579	3.27392	3.46598	6.43392	4.50881	-2.02934	1.62382
4.95203	3.29422	3.43775	6.45412	4.5526	-1.94207	1.65134
4.95827	3.33022	3.43382	6.46333	4.57782	-1.92218	1.67723
4.96451	3.36148	3.43874	6.43682	4.57411	-1.97396	1.76067
4.97075	3.40381	3.39628	6.3621	4.57115	-2.01756	1.79175
4.977	3.48203	3.31674	6.38393	4.56968	-2.02887	1.79828
4.98324	3.59062	3.24475	6.42688	4.57174	-1.99762	1.82072
4.98948	3.71926	3.21425	6.4135	4.58007	-2.02871	1.85173
4.99572	3.84976	3.2254	6.35633	4.5601	-2.0576	1.88593
5.00197	3.99304	3.24837	6.33366	4.57807	-2.06044	1.90859
5.00821	4.09225	3.26587	6.37575	4.62896	-2.15724	1.88984
5.01445	4.10831	3.31975	6.3841	4.61184	-2.22057	1.90954
5.02069	4.0677	3.34148	6.37159	4.59069	-2.27572	1.93829
5.02694	4.03756	3.31102	6.35917	4.60802	-2.28245	1.89322
5.03318	4.03307	3.31975	6.46983	4.65135	-2.26954	1.81207
5.03942	3.97797	3.36368	6.48877	4.68359	-2.24581	1.74567
5.04566	3.89254	3.42184	6.43246	4.69608	-2.20676	1.70853
5.0519	3.81661	3.48616	6.4428	4.72034	-2.16139	1.67147
5.05815	3.77061	3.52712	6.48957	4.78965	-2.15992	1.61765
5.06439	3.73271	3.53606	6.53603	4.85302	-2.23003	1.56283
5.07063	3.72433	3.5178	6.62	4.86824	-2.30562	1.51068
5.07687	3.76148	3.46557	6.63439	4.91661	-2.35882	1.46442
5.08312	3.78019	3.46091	6.64443	4.98912	-2.37969	1.43145
5.08936	3.78549	3.513	6.70803	5.03895	-2.37148	1.40576
5.0956	3.82657	3.5325	6.67865	5.01722	-2.37717	1.40762
5.10184	3.91196	3.53299	6.67323	4.99152	-2.40764	1.42929
5.10808	3.96896	3.54483	6.71429	4.99958	-2.37503	1.44755
5.11433	3.97959	3.56105	6.72753	4.99985	-2.37045	1.46422
5.12057	3.95417	3.57909	6.75501	5.00418	-2.38948	1.47276
5.12681	3.92779	3.60757	6.77507	5.04338	-2.38161	1.46971
5.13305	3.91813	3.66016	6.68471	5.12765	-2.33988	1.45827
5.1393	3.91291	3.6923	6.63772	5.11698	-2.3138	1.42358
5.14554	3.92572	3.68038	6.62107	5.05201	-2.35743	1.36354
5.15178	3.92378	3.65018	6.60778	5.03993	-2.40131	1.32187
5.15802	3.84202	3.60929	6.61925	5.05768	-2.44752	1.28711
5.16427	3.78739	3.56491	6.65533	5.0668	-2.51827	1.24439
5.17051	3.7831	3.52022	6.71344	5.0573	-2.68698	1.24332
5.17675	3.82356	3.44402	6.78663	5.01361	-2.78069	1.28245
5.18299	3.83546	3.34966	6.85487	4.93967	-2.80387	1.30981
5.18924	3.82191	3.30079	6.91276	4.85135	-2.76483	1.26375
5.19548	3.81418	3.33069	6.91383	4.74241	-2.80242	1.18962
5.20172	3.83196	3.39154	6.95594	4.72704	-2.87903	1.13025
5.20796	3.83485	3.41626	7.05786	4.79214	-2.88955	1.07176
5.2142	3.80203	3.44357	7.08449	4.84026	-2.91048	1.05123
5.22045	3.79637	3.50547	7.04678	4.8877	-2.9078	1.06185
5.22669	3.81247	3.6006	6.99291	4.96512	-2.8933	1.06039
5.23293	3.82632	3.68429	7.01428	5.09683	-2.88718	1.04259
5.23917	3.75675	3.78257	6.99483	5.18166	-2.88836	0.993959
5.24542	3.77658	3.89614	6.92798	5.21103	-2.85965	0.923616
5.25166	3.85224	3.9795	6.85229	5.24767	-2.89403	0.887928
5.2579	3.83475	3.98566	6.90791	5.27622	-2.87976	0.911802
5.26414	3.8222	3.9767	6.9511	5.27364	-2.8307	0.978524
5.27038	3.86422	4.03148	6.86925	5.25555	-2.81738	1.06991
5.27663	3.9355	4.0487	6.8231	5.24219	-2.85695	1.09348
5.28287	3.99135	4.01448	6.86313	5.21164	-2.91496	1.06123
5.28911	3.98876	3.98713	6.96786	5.12647	-2.88251	1.05382
5.29535	3.93837	3.98054	6.93827	4.98571	-2.84047	1.00866
5.3016	3.97052	3.96429	6.91475	4.95254	-2.82715	0.959085
5.30784	3.95591	3.91374	6.95132	5.00147	-2.87621	0.976483
5.31408	3.88021	3.86461	7.0154	4.97703	-2.94082	1.07233
5.32032	3.8825	3.82392	7.0149	4.93712	-3.01075	1.12303
5.32657	3.84286	3.79027	6.99538	4.90036	-3.10086	1.05319
5.33281	3.76174	3.76758	7.02099	4.83583	-3.15585	0.9874
5.33905	3.73036	3.77625	7.06421	4.76522	-3.19695	1.0098
5.34529	3.71691	3.78236	7.07788	4.7771	-3.23001	1.07419
5.35153	3.70876	3.75016	7.04749	4.8711	-3.23928	1.08741
5.35778	3.69836	3.71844	7.07353	4.94306	-3.25848	1.05292
5.36402	3.69928	3.71962	7.08477	4.94617	-3.31139	1.00214
5.37026	3.73491	3.74119	7.01595	4.92934	-3.38283	0.93798
5.3765	3.79453	3.73476	6.96062	4.93281	-3.4199	0.818446
5.38274	3.85749	3.75289	6.95052	4.96243	-3.41962	0.73547
5.38899	3.92536	3.80925	6.97271	5.01985	-3.41485	0.786234
5.39523	3.9811	3.77858	6.97648	5.10111	-3.39288	0.816576
5.40147	3.97455	3.7329	6.94548	5.19846	-3.34657	0.767148
5.40771	3.95023	3.75575	6.89975	5.25184	-3.25397	0.709687
5.41396	3.94872	3.82414	6.87204	5.21683	-3.25043	0.682811
5.4202	4.04102	3.86461	6.8872	5.21767	-3.25355	0.715788
5.42644	4.06691	3.86163	6.95136	5.2453	-3.24281	0.780087
5.43268	4.01612	3.86591	7.04643	5.21318	-3.22977	0.796125
5.43893	3.96493	3.84393	7.0644	5.20081	-3.20512	0.820377
5.44517	3.98147	3.7639	7.04674	5.25757	-3.13714	0.870582
5.45141	4.01548	3.69431	7.06906	5.3447	-3.05316	0.838692
5.45765	3.98636	3.74409	7.08205	5.36328	-3.02394	0.800915
5.46389	3.97409	3.82432	7.10084	5.31113	-3.05093	0.792776
5.47014	3.99141	3.7985	7.15612	5.26388	-3.10985	0.748497
5.47638	4.01363	3.72127	7.14848	5.24178	-3.17187	0.684932
5.48262	3.95646	3.63577	7.0657	5.18778	-3.22353	0.602197
5.48886	3.93074	3.57047	6.96361	5.14049	-3.25337	0.494324
5.49511	3.9602	3.52709	6.90906	5.18943	-3.25117	0.431508
5.50135	3.96485	3.55139	6.92227	5.2177	-3.29555	0.398166
5.50759	3.88541	3.59642	6.96166	5.15793	-3.44069	0.358562
5.51383	3.8073	3.55194	7.01248	5.09655	-3.52594	0.354083
5.52008	3.84572	3.49672	7.10141	5.05101	-3.5312	0.371635
5.52632	3.9082	3.49473	7.16563	5.02778	-3.45293	0.38882
5.53256	3.95095	3.49526	7.14031	5.06303	-3.45775	0.382298
5.5388	3.99308	3.49376	7.17764	5.14375	-3.46557	0.366907
5.54504	4.05881	3.54909	7.25138	5.20944	-3.46097	0.377734
5.55129	4.11165	3.67649	7.29143	5.21693	-3.43985	0.405828
5.55753	4.13255	3.75979	7.32194	5.16125	-3.40919	0.436442
5.56377	4.14405	3.79112	7.37465	5.1642	-3.36872	0.446097
5.57001	4.13858	3.82708	7.4346	5.21334	-3.33676	0.42531
5.57625	4.10617	3.86151	7.39677	5.15235	-3.28198	0.405239
5.5825	4.05928	3.82536	7.34959	5.07628	-3.26637	0.387653
5.58874	4.01407	3.74898	7.35336	5.02989	-3.36839	0.362302
5.59498	3.97839	3.77471	7.3881	4.93961	-3.39107	0.367624
5.60122	3.98618	3.82395	7.4071	4.90321	-3.39931	0.376287
5.60747	4.00397	3.7873	7.42157	4.96455	-3.42578	0.350028
5.61371	4.00387	3.6246	7.43226	5.07358	-3.4944	0.313527
5.61995	3.96659	3.49353	7.42076	5.18558	-3.57137	0.262056
5.62619	3.9475	3.46131	7.39405	5.22638	-3.63501	0.199552
5.63244	3.95425	3.48575	7.37175	5.19233	-3.63494	0.154314
5.63868	3.96383	3.53064	7.3625	5.1737	-3.68804	0.122868
5.64492	3.93915	3.58587	7.37903	5.22836	-3.7469	0.101772
5.65116	3.92945	3.66696	7.42811	5.33501	-3.71887	0.107828
5.6574	3.94492	3.74197	7.47335	5.4288	-3.67213	0.103945
5.66365	3.91594	3.80009	7.49637	5.44582	-3.6556	0.096787
5.66989	3.85856	3.85374	7.52019	5.38418	-3.72693	0.138614
5.67613	3.81862	3.99453	7.56867	5.27126	-3.67665	0.190577
5.68237	3.8357	4.13015	7.60835	5.14348	-3.63233	0.227928
5.68862	3.83624	4.16443	7.61816	5.08756	-3.65976	0.260461
5.69486	3.8189	4.17036	7.60192	5.12913	-3.67918	0.294471
5.7011	3.82453	4.18599	7.60273	5.20531	-3.67129	0.346301
5.70734	3.86002	4.18794	7.59215	5.22005	-3.65101	0.399238
5.71359	3.87675	4.11471	7.55006	5.17669	-3.72431	0.385002
5.71983	3.85713	4.04087	7.50711	5.20082	-3.80358	0.360073
5.72607	3.83007	4.02656	7.48222	5.24872	-3.81637	0.378852
5.73231	3.84303	4.05428	7.48949	5.2324	-3.72917	0.389001
5.73855	3.90555	4.01028	7.49689	5.2191	-3.73887	0.396175
5.7448	3.98448	3.94898	7.50604	5.24352	-3.7596	0.395334
5.75104	4.05871	3.97281	7.52297	5.28332	-3.72235	0.36938
5.75728	4.11611	3.96163	7.56136	5.30379	-3.75426	0.34394
5.76352	4.1696	3.92846	7.60128	5.31534	-3.81217	0.313187
5.76977	4.2391	3.92736	7.62479	5.33479	-3.85254	0.243333
5.77601	4.3082	3.96008	7.64244	5.35874	-3.81976	0.172523
5.78225	4.35348	3.99597	7.67469	5.31031	-3.82624	0.119451
5.78849	4.42364	4.01324	7.67908	5.22318	-3.88257	0.078599
5.79474	4.46908	4.01038	7.61565	5.21658	-3.94017	0.058682
5.80098	4.42467	4.03786	7.57814	5.22681	-3.95082	0.030323
5.80722	4.37816	4.0895	7.58417	5.21419	-3.93295	-0.021936
5.81346	4.36263	4.07586	7.59251	5.18052	-3.9636	-0.02305
5.8197	4.34451	4.08519	7.56221	5.13306	-3.94139	-0.00337
5.82595	4.32144	4.12533	7.54385	5.08591	-3.90813	-0.004722
5.83219	4.26931	4.17273	7.56129	5.05068	-3.92269	0.023073
5.83843	4.20321	4.25403	7.55895	5.03507	-3.96909	0.06443
5.84467	4.19494	4.30847	7.57613	5.05188	-4.0075	0.099214
5.85091	4.18353	4.2321	7.64641	5.08139	-4.0106	0.133444
5.85716	4.16628	4.22564	7.76272	5.10763	-4.00209	0.143079
5.8634	4.19177	4.22242	7.80864	5.15634	-4.04234	0.153301
5.86964	4.1437	4.11733	7.7789	5.23167	-4.13533	0.201217
5.87589	4.09313	4.02978	7.73572	5.30054	-4.13389	0.196998
5.88213	4.15561	3.93263	7.76966	5.30301	-4.1596	0.123837
5.88837	4.25067	3.81932	7.82964	5.2695	-4.23321	0.035965
5.89461	4.30835	3.7366	7.84051	5.29575	-4.31605	-0.053928
5.90085	4.31503	3.64464	7.81881	5.301	-4.37549	-0.11571
5.9071	4.34669	3.57983	7.79337	5.27751	-4.41523	-0.157023
5.91334	4.36163	3.63376	7.78336	5.285	-4.41691	-0.233177
5.91958	4.31575	3.65888	7.70827	5.31121	-4.45275	-0.306696
5.92582	4.24262	3.67189	7.65648	5.31873	-4.49065	-0.34543
5.93206	4.24568	3.69079	7.68792	5.29824	-4.49247	-0.385097
5.93831	4.27579	3.7351	7.78369	5.3062	-4.53827	-0.380168
5.94455	4.20859	3.81132	7.84531	5.3676	-4.57141	-0.346627
5.95079	4.10517	3.87909	7.875	5.42801	-4.56808	-0.367376
5.95703	4.0565	3.89111	7.92058	5.41603	-4.53015	-0.402458
5.96328	4.06163	3.89847	7.97932	5.38404	-4.49012	-0.41426
5.96952	4.05482	3.95041	8.01862	5.37465	-4.47543	-0.40854
5.97576	4.03938	3.97502	8.03389	5.39544	-4.54107	-0.383697
5.982	4.02142	3.9657	8.05467	5.39468	-4.57678	-0.394579
5.98825	4.0391	3.93876	8.05567	5.35405	-4.57998	-0.467142
5.99449	4.0404	3.97999	8.01714	5.32875	-4.59288	-0.531191
6.00073	3.99219	4.02421	7.97595	5.27892	-4.58958	-0.597921
6.00697	4.02128	4.07809	7.95584	5.23887	-4.58847	-0.651719
6.01321	4.07101	4.14393	7.95513	5.24444	-4.63441	-0.629577
6.01946	4.07077	4.21753	7.92233	5.26087	-4.66114	-0.573736
6.0257	4.05905	4.26374	7.87668	5.31519	-4.64997	-0.554937
6.03194	3.99182	4.20411	7.83595	5.3862	-4.60745	-0.597866
6.03818	3.92356	4.13082	7.78332	5.36838	-4.61689	-0.650496
6.04443	3.94664	4.10171	7.77495	5.32134	-4.63442	-0.661192
6.05067	4.0113	4.18339	7.80616	5.33725	-4.63186	-0.650656
6.05691	4.07899	4.19149	7.83967	5.39757	-4.62839	-0.617162
6.06315	4.13927	4.13862	7.85557	5.45037	-4.65797	-0.5885
6.0694	4.11553	4.07206	7.8241	5.45482	-4.68454	-0.599575
6.07564	4.09911	4.11154	7.74112	5.47023	-4.62872	-0.600282
6.08188	4.16933	4.16855	7.76098	5.53324	-4.61834	-0.600499
6.08812	4.20372	4.2045	7.86063	5.58893	-4.67023	-0.614617
6.09436	4.21325	4.19294	7.93646	5.55366	-4.76239	-0.589564
6.10061	4.24756	4.2968	8.01804	5.54313	-4.76329	-0.553675
6.10685	4.31302	4.40361	8.11258	5.57764	-4.75215	-0.532457
6.11309	4.34191	4.25602	8.19956	5.58291	-4.77931	-0.520062
6.11933	4.32503	4.26426	8.22354	5.55112	-4.78491	-0.545588
6.12558	4.31466	4.33741	8.18436	5.55057	-4.76823	-0.58835
6.13182	4.33168	4.37092	8.14749	5.61177	-4.75667	-0.60252
6.13806	4.32935	4.25308	8.13832	5.63148	-4.80584	-0.64815
6.1443	4.27284	4.1132	8.11524	5.59161	-4.84968	-0.735086
6.15055	4.30274	4.03789	8.08834	5.546	-4.85893	-0.821978
6.15679	4.38247	4.09391	8.05809	5.5427	-4.81637	-0.873993
6.16303	4.40057	4.04343	8.03519	5.55785	-4.83088	-0.887157
6.16927	4.34108	3.93098	8.00382	5.58108	-4.87321	-0.905759
6.17551	4.29214	4.0369	7.92806	5.59822	-4.83553	-0.930989
6.18176	4.30467	4.0621	7.92249	5.60432	-4.80768	-0.93463
6.188	4.32287	4.04039	7.98746	5.62031	-4.82637	-0.891953
6.19424	4.34838	4.07219	8.04684	5.6638	-4.88636	-0.876897
6.20048	4.39497	4.16158	8.06832	5.72154	-4.89661	-0.884456
6.20672	4.4474	4.24537	8.01771	5.75448	-4.86313	-0.876743
6.21297	4.44859	4.24937	7.93936	5.77169	-4.81958	-0.854371
6.21921	4.42694	4.2588	7.90672	5.82996	-4.88093	-0.810001
6.22545	4.45332	4.3132	7.8522	5.89677	-4.88905	-0.763093
6.23169	4.48496	4.39336	7.76806	5.93192	-4.81963	-0.76092
6.23794	4.49234	4.32787	7.73102	6.00166	-4.83021	-0.74546
6.24418	4.50003	4.29526	7.72766	6.06288	-4.84086	-0.732055
6.25042	4.55655	4.3141	7.71917	6.06256	-4.8001	-0.777724
6.25666	4.60195	4.25382	7.68981	6.03303	-4.73335	-0.804622
6.26291	4.5882	4.21316	7.69904	6.00495	-4.72265	-0.795832
6.26915	4.55139	4.20062	7.74083	5.99057	-4.75488	-0.76482
6.27539	4.54	4.18156	7.77135	6.00621	-4.77236	-0.727186
6.28163	4.55486	4.08997	7.82154	5.97067	-4.72206	-0.750227
6.28787	4.55415	3.97181	7.87817	5.87769	-4.69465	-0.863345
6.29412	4.57132	3.88484	7.92094	5.80594	-4.72411	-0.938416
6.30036	4.59184	3.9644	7.99702	5.72679	-4.75559	-1.00964
6.3066	4.54216	4.05124	8.06302	5.65628	-4.81982	-1.07373
6.31284	4.49843	4.08892	8.08661	5.60852	-4.92352	-1.08462
6.31909	4.51644	4.14546	8.08796	5.54475	-5.0125	-1.04893
6.32533	4.5576	4.14797	8.07002	5.51482	-5.0366	-1.00277
6.33157	4.62236	4.10898	8.05568	5.55244	-5.02485	-1.00521
6.33781	4.65742	4.12511	8.05141	5.59265	-5.05335	-1.0337
6.34405	4.6234	4.13686	8.04362	5.65892	-5.11069	-1.04594
6.3503	4.60495	4.141	8.05284	5.73927	-5.16047	-0.996669
6.35654	4.5805	4.21878	8.08402	5.80877	-5.16402	-0.940818
6.36278	4.52817	4.16377	8.07426	5.8639	-5.18993	-0.892735
6.36902	4.53123	4.05543	8.03726	5.89414	-5.23389	-0.874237
6.37527	4.54192	3.9857	8.02436	5.90406	-5.26269	-0.895683
6.38151	4.52068	4.01376	8.03353	5.89698	-5.26972	-0.959958
6.38775	4.50802	4.06049	8.03741	5.8597	-5.29028	-1.05749
6.39399	4.47831	4.07121	8.0323	5.76478	-5.33602	-1.13172
6.40024	4.47859	4.15096	8.05352	5.63602	-5.36483	-1.14687
6.40648	4.5789	4.22991	8.05531	5.53844	-5.3734	-1.11657
6.41272	4.62463	4.2472	8.01772	5.51039	-5.39768	-1.1355
6.41896	4.60367	4.17467	7.98597	5.46619	-5.47791	-1.14103
6.42521	4.63562	4.17414	7.97234	5.42593	-5.48846	-1.1356
6.43145	4.66758	4.23141	7.95756	5.44449	-5.41304	-1.16098
6.43769	4.64852	4.34445	7.91958	5.44947	-5.35731	-1.18191
6.44393	4.5998	4.3199	7.94016	5.46275	-5.36818	-1.18594
6.45017	4.58096	4.23525	8.01136	5.52046	-5.40092	-1.17022
6.45642	4.57211	4.22049	8.04579	5.56047	-5.40552	-1.14796
6.46266	4.51492	4.19831	8.08849	5.59621	-5.40493	-1.14136
6.4689	4.41884	4.24072	8.13768	5.6117	-5.3761	-1.16267
6.47514	4.3791	4.3676	8.16052	5.55391	-5.28472	-1.20645
6.48139	4.40939	4.46176	8.19969	5.53342	-5.24072	-1.28677
6.48763	4.4219	4.55176	8.25129	5.55085	-5.2993	-1.36291
6.49387	4.4123	4.64003	8.28544	5.4994	-5.40657	-1.37058
6.50011	4.40477	4.59623	8.31413	5.45404	-5.44503	-1.34757
6.50635	4.41214	4.59984	8.27379	5.43171	-5.39199	-1.29306
6.5126	4.44606	4.63094	8.2057	5.44907	-5.31235	-1.22495
6.51884	4.50457	4.64131	8.2218	5.51218	-5.29328	-1.19663
6.52508	4.56037	4.65663	8.20164	5.5741	-5.31925	-1.23719
6.53132	4.59695	4.6865	8.1364	5.60142	-5.3755	-1.30965
6.53756	4.60495	4.64154	8.11867	5.61653	-5.49388	-1.31855
6.54381	4.58338	4.59924	8.08898	5.60507	-5.54738	-1.31868
6.55005	4.53433	4.54865	8.05067	5.59226	-5.52602	-1.34604
6.55629	4.50079	4.4901	8.04938	5.62312	-5.5146	-1.33792
6.56253	4.50512	4.50474	8.07765	5.69802	-5.55539	-1.34865
6.56878	4.52282	4.54549	8.13193	5.76075	-5.62761	-1.41227
6.57502	4.48483	4.58009	8.17394	5.70097	-5.68269	-1.46299
6.58126	4.40958	4.57414	8.1563	5.63381	-5.68793	-1.49816
6.5875	4.39016	4.51141	8.13082	5.59378	-5.67018	-1.51606
6.59375	4.39516	4.44066	8.13672	5.58118	-5.65755	-1.48706
6.59999	4.3987	4.41251	8.13807	5.60616	-5.59995	-1.43096
6.60623	4.41229	4.4133	8.1214	5.63882	-5.54385	-1.36939
6.61247	4.45876	4.44168	8.07986	5.65381	-5.5286	-1.36545
6.61871	4.50263	4.41244	8.0288	5.67612	-5.47812	-1.36015
6.62496	4.49455	4.34774	7.98026	5.67491	-5.44467	-1.33101
6.6312	4.46583	4.29024	7.9758	5.64152	-5.47823	-1.33407
6.63744	4.44042	4.31554	8.03831	5.64225	-5.52738	-1.36834
6.64368	4.41328	4.37863	8.08163	5.6358	-5.58479	-1.39725
6.64993	4.36434	4.42568	8.08616	5.61193	-5.63352	-1.41506
6.65617	4.33206	4.44522	8.12645	5.60619	-5.63177	-1.42762
6.66241	4.35396	4.50942	8.20678	5.62366	-5.64573	-1.48096
6.66865	4.41423	4.50909	8.27927	5.64651	-5.68915	-1.54947
6.6749	4.4617	4.39362	8.30496	5.64552	-5.73414	-1.51446
6.68114	4.50069	4.40241	8.35753	5.66662	-5.76862	-1.52074
6.68738	4.58201	4.43579	8.42629	5.68908	-5.766	-1.55907
6.69362	4.6632	4.46983	8.42895	5.6553	-5.74522	-1.57071
6.69986	4.72174	4.39476	8.33897	5.66723	-5.75093	-1.58248
6.70611	4.77615	4.36275	8.28287	5.71804	-5.75388	-1.56797
6.71235	4.81734	4.34753	8.32683	5.76705	-5.73969	-1.51464
6.71859	4.83091	4.29322	8.36745	5.7962	-5.75426	-1.4995
6.72483	4.81663	4.27731	8.32069	5.79495	-5.79928	-1.5047
6.73108	4.78628	4.33437	8.23903	5.76411	-5.83342	-1.51495
6.73732	4.74901	4.4614	8.26477	5.75315	-5.82601	-1.50469
6.74356	4.70889	4.45634	8.31557	5.70148	-5.87284	-1.48468
6.7498	4.66366	4.42371	8.33522	5.63865	-5.96372	-1.46125
6.75605	4.62919	4.3955	8.31197	5.70087	-6.00728	-1.43932
6.76229	4.62807	4.41432	8.3127	5.79157	-5.99715	-1.45627
6.76853	4.68304	4.40792	8.35969	5.89066	-5.99997	-1.52157
6.77477	4.73569	4.38732	8.39316	5.94268	-6.06186	-1.60641
6.78101	4.73487	4.37469	8.37205	5.97529	-6.12059	-1.69173
6.78726	4.71682	4.30508	8.36509	6.01077	-6.13639	-1.7431
6.7935	4.68697	4.20562	8.41177	6.05277	-6.13476	-1.73711
6.79974	4.6965	4.14342	8.40777	6.05362	-6.15579	-1.77908
6.80598	4.78036	4.16691	8.35376	6.04869	-6.15545	-1.85372
6.81222	4.83505	4.21416	8.32769	6.064	-6.11832	-1.94241
6.81847	4.83778	4.16514	8.41121	6.04077	-6.08979	-2.00242
6.82471	4.83559	4.14455	8.49498	5.99819	-6.11531	-2.00344
6.83095	4.81076	4.15596	8.48447	5.9694	-6.16549	-1.93874
6.83719	4.78908	4.22927	8.44963	5.96159	-6.19354	-1.88902
6.84344	4.7822	4.30638	8.43815	5.92655	-6.16038	-1.81535
6.84968	4.7653	4.38843	8.44474	5.87403	-6.11396	-1.72578
6.85592	4.78156	4.47856	8.43844	5.86681	-6.13209	-1.70618
6.86216	4.80633	4.55025	8.43436	5.9243	-6.15537	-1.69516
6.86841	4.75743	4.62599	8.44768	6.01809	-6.16908	-1.67277
6.87465	4.70868	4.73713	8.4623	6.09301	-6.20391	-1.62674
6.88089	4.68391	4.85559	8.41673	6.11347	-6.26137	-1.62298
6.88713	4.63879	4.92103	8.30559	6.07554	-6.30937	-1.66425
6.89337	4.58108	4.91962	8.16408	6.00369	-6.33366	-1.70804
6.89962	4.55707	4.85335	8.00216	5.93978	-6.37231	-1.73378
6.90586	4.59407	4.79402	7.78961	5.91299	-6.4434	-1.75092
6.9121	4.6286	4.72628	7.47609	5.92145	-6.48996	-1.75811
6.91834	4.62414	4.62402	7.07769	5.86878	-6.46192	-1.7878
6.92459	4.59741	4.59311	6.64374	5.82681	-6.45565	-1.81069
6.93083	4.58345	4.5385	6.19648	5.8149	-6.50356	-1.81184
6.93707	4.60421	4.42105	5.69479	5.77554	-6.54667	-1.85355
6.94331	4.65658	4.33163	5.22873	5.79814	-6.53852	-1.87459
6.94956	4.6837	4.29703	4.82001	5.85055	-6.50985	-1.87085
6.9558	4.69841	4.32844	4.3995	5.85534	-6.50806	-1.86268
6.96204	4.71669	4.37073	3.92916	5.86435	-6.47691	-1.85432
6.96828	4.7284	4.41253	3.50104	5.85721	-6.46249	-1.88218
6.97452	4.76599	4.46234	3.2275	5.82715	-6.50775	-1.98079
6.98077	4.81099	4.57014	2.97536	5.81632	-6.53633	-2.03232
6.98701	4.82264	4.56401	2.69832	5.76857	-6.50812	-2.06448
6.99325	4.86263	4.5183	2.41211	5.69674	-6.44833	-2.07
6.99949	4.89878	4.57273	2.15042	5.70947	-6.41646	-2.0873
7.00574	4.88022	4.6302	1.90334	5.71704	-6.4	-2.08221
7.01198	4.89638	4.65264	1.71636	5.68508	-6.38	-2.01731
7.01822	4.94283	4.64062	1.64847	5.69034	-6.38495	-1.95526
7.02446	4.96212	4.65433	1.69144	5.68476	-6.40462	-1.95186
7.03071	4.93305	4.69965	1.78201	5.67787	-6.403	-2.03815
7.03695	4.91642	4.78398	1.84676	5.74766	-6.38912	-2.0849
7.04319	4.96973	4.80477	1.98288	5.8151	-6.41614	-2.05512
7.04943	5.01964	4.87886	2.1896	5.85505	-6.50009	-1.98481
7.05567	5.02738	4.97962	2.44098	5.85925	-6.58237	-1.99175
7.06192	5.03049	4.97453	2.73081	5.82148	-6.61076	-2.00155
7.06816	5.10761	5.01876	3.01497	5.78185	-6.61385	-2.05121
7.0744	5.18493	5.09075	3.24972	5.77365	-6.63095	-2.16356
7.08064	5.20822	5.14042	3.50152	5.77702	-6.60428	-2.27604
7.08688	5.20668	5.1478	3.77373	5.81388	-6.57646	-2.31844
7.09313	5.28472	5.1356	4.02419	5.85883	-6.59873	-2.27531
7.09937	5.36026	5.1493	4.21297	5.81918	-6.65318	-2.23798
7.10561	5.32369	5.11046	4.36024	5.79592	-6.65576	-2.27317
7.11186	5.28944	5.03984	4.48667	5.81223	-6.58668	-2.38556
7.1181	5.2388	4.97377	4.59149	5.84313	-6.53548	-2.46815
7.12434	5.16329	4.96152	4.65577	5.9193	-6.51786	-2.47179
7.13058	5.11375	4.9349	4.69688	6.05068	-6.53523	-2.41651
7.13682	5.098	4.87947	4.78456	6.13191	-6.56877	-2.39823
7.14307	5.09315	4.83976	4.86172	6.16915	-6.6082	-2.42122
7.14931	5.08175	4.8427	4.89287	6.16101	-6.63554	-2.46074
7.15555	5.03942	4.85767	4.88708	6.12103	-6.64496	-2.49487
7.16179	4.97478	4.73905	4.92555	6.11707	-6.67077	-2.52644
7.16804	4.88892	4.72905	5.03387	6.11787	-6.73485	-2.54055
7.17428	4.83283	4.76836	5.1896	6.05818	-6.80865	-2.51757
7.18052	4.86729	4.75098	5.34286	6.0268	-6.85126	-2.44614
7.18676	4.93727	4.7411	5.47778	5.9769	-6.87682	-2.40871
7.19301	4.91213	4.77085	5.57418	5.88833	-6.89214	-2.44421
7.19925	4.83522	4.844	5.64564	5.80648	-6.90782	-2.44976
7.20549	4.82617	4.86357	5.69769	5.74602	-6.901	-2.44897
7.21173	4.87685	4.85298	5.72829	5.74716	-6.86414	-2.43619
7.21797	4.92956	4.85722	5.75247	5.78688	-6.82025	-2.41447
7.22422	4.96579	4.8953	5.79774	5.80855	-6.76613	-2.41088
7.23046	5.04603	4.90081	5.86881	5.83436	-6.73848	-2.41097
7.2367	5.07572	4.89545	5.89292	5.95073	-6.75818	-2.39321
7.24294	5.03696	4.98066	5.90863	6.00938	-6.75243	-2.43981
7.24918	5.02942	4.97738	5.94313	6.00573	-6.71481	-2.5058
7.25543	5.02886	4.91448	5.99198	6.00253	-6.68487	-2.53942
7.26167	5.03585	4.91432	6.03072	6.0427	-6.64243	-2.48506
7.26791	5.08177	4.98033	6.06508	6.08666	-6.62106	-2.42781
7.27415	5.09318	5.03365	6.11237	6.10659	-6.6522	-2.42268
7.2804	5.07113	5.03524	6.19477	6.16275	-6.69774	-2.38531
7.28664	5.07438	5.08614	6.28118	6.214	-6.73409	-2.35914
7.29288	5.0622	5.11778	6.32325	6.20931	-6.7299	-2.36215
7.29912	5.06076	5.09174	6.33964	6.16988	-6.68882	-2.33141
7.30537	5.09045	5.01856	6.33171	6.15505	-6.61895	-2.27129
7.31161	5.08926	4.99433	6.32659	6.17047	-6.55187	-2.19357
7.31785	5.14579	4.99969	6.32351	6.18548	-6.53958	-2.13842
7.32409	5.22843	4.94562	6.31912	6.20136	-6.5651	-2.14747
7.33033	5.1732	4.92767	6.3254	6.21686	-6.58564	-2.1764
7.33658	5.11842	4.95721	6.33551	6.23294	-6.55795	-2.22511
7.34282	5.1019	5.03324	6.33647	6.23134	-6.47711	-2.29451
7.34906	5.05927	5.06671	6.33063	6.23865	-6.35014	-2.33738
7.3553	5.08198	5.08002	6.33235	6.25405	-6.2376	-2.32607
7.36155	5.1521	5.06991	6.36955	6.29469	-6.16986	-2.32131
7.36779	5.17377	5.02449	6.4092	6.34844	-6.17559	-2.3334
7.37403	5.18361	4.98868	6.43339	6.38862	-6.20203	-2.39606
7.38027	5.17291	4.99076	6.46775	6.37958	-6.12684	-2.43595
7.38652	5.13589	5.0359	6.49554	6.38005	-6.00152	-2.44507
7.39276	5.13965	5.03658	6.51687	6.41172	-5.8744	-2.39028
7.399	5.13366	4.97748	6.55968	6.42917	-5.73559	-2.32821
7.40524	5.08781	4.89606	6.58459	6.40477	-5.64112	-2.26605
7.41148	5.04642	4.83153	6.54849	6.35545	-5.61948	-2.19969
7.41773	5.00136	4.80165	6.49623	6.3402	-5.6096	-2.21473
7.42397	4.97949	4.84009	6.45225	6.30951	-5.591	-2.2692
7.43021	4.99189	4.90949	6.4256	6.29504	-5.57442	-2.31799
7.43645	4.99275	4.98359	6.41864	6.35401	-5.59256	-2.34514
7.4427	4.96911	5.0786	6.45626	6.40374	-5.65552	-2.37551
7.44894	4.95904	5.1138	6.51547	6.41217	-5.72909	-2.4339
7.45518	4.98968	5.14296	6.51095	6.38876	-5.7743	-2.5156
7.46142	5.06859	5.18518	6.50579	6.41219	-5.77895	-2.54342
7.46767	5.16861	5.20574	6.52213	6.45382	-5.74139	-2.58019
7.47391	5.26928	5.20565	6.53421	6.48235	-5.7185	-2.62766
7.48015	5.32823	5.177	6.53969	6.51391	-5.72498	-2.63744
7.48639	5.30424	5.16186	6.5783	6.53088	-5.72554	-2.65732
7.49263	5.25803	5.17976	6.67317	6.52533	-5.68155	-2.66754
7.49888	5.23469	5.21091	6.7128	6.48387	-5.63129	-2.62719
7.50512	5.26909	5.21081	6.71554	6.45692	-5.59384	-2.61216
7.51136	5.25394	5.18377	6.73228	6.41327	-5.55569	-2.63147
7.5176	5.18028	5.13681	6.76709	6.34312	-5.52588	-2.65586
7.52384	5.07636	5.08411	6.792	6.26513	-5.58288	-2.66905
7.53009	4.99641	5.11529	6.8434	6.20814	-5.69588	-2.68604
7.53633	4.92906	5.19668	6.9266	6.15904	-5.73361	-2.70962
7.54257	4.868	5.26507	7.00078	6.16353	-5.70724	-2.69136
7.54881	4.82375	5.37257	7.03611	6.18398	-5.6471	-2.68766
7.55506	4.80653	5.47165	7.01834	6.15286	-5.6024	-2.72715
7.5613	4.82441	5.52535	7.03909	6.12877	-5.5722	-2.76313
7.56754	4.87705	5.52905	7.06482	6.13456	-5.53475	-2.74447
7.57378	4.98322	5.52855	7.10281	6.16998	-5.45812	-2.69409
7.58003	5.10972	5.52697	7.22358	6.22993	-5.43104	-2.69914
7.58627	5.20402	5.55703	7.34153	6.23938	-5.38331	-2.70143
7.59251	5.24356	5.5426	7.38689	6.20122	-5.27981	-2.69023
7.59875	5.2465	5.52526	7.45026	6.20879	-5.20612	-2.65861
7.60499	5.27096	5.60221	7.50223	6.19353	-5.14438	-2.65731
7.61124	5.39856	5.60942	7.50262	6.19177	-5.0967	-2.67617
7.61748	5.52937	5.56341	7.4869	6.21083	-5.05942	-2.7336
7.62372	5.56598	5.49512	7.48228	6.21137	-4.99874	-2.75283
7.62996	5.51811	5.46208	7.48144	6.20958	-4.92897	-2.73986
7.63621	5.46007	5.47367	7.43805	6.17381	-4.86606	-2.72557
7.64245	5.40738	5.52205	7.37766	6.18107	-4.80084	-2.7221
7.64869	5.37527	5.55148	7.31163	6.24071	-4.76163	-2.74866
7.65493	5.39079	5.53476	7.22407	6.35462	-4.75129	-2.80852
7.66118	5.43736	5.46739	7.155	6.33732	-4.7321	-2.86786
7.66742	5.4322	5.38205	7.12315	6.26135	-4.69261	-2.91594
7.67366	5.37179	5.31308	7.09156	6.17651	-4.62285	-2.93304
7.6799	5.3122	5.25984	7.08389	6.14671	-4.54859	-2.81764
7.68614	5.26389	5.22919	7.07716	6.11759	-4.45756	-2.80133
7.69239	5.19781	5.19474	7.04876	6.09936	-4.37476	-2.88189
7.69863	5.14171	5.16734	7.03111	6.10107	-4.33774	-2.98825
7.70487	5.13555	5.17937	7.01406	6.09677	-4.25408	-3.00863
7.71111	5.13535	5.16378	7.00709	6.07699	-4.11188	-2.9637
7.71736	5.1115	5.14865	6.99782	5.97841	-3.96247	-2.91126
7.7236	5.09541	5.1647	6.95794	5.99727	-3.84483	-2.90633
7.72984	5.16584	5.13461	6.94409	6.04245	-3.77087	-2.91224
7.73608	5.1837	5.11041	7.0198	6.05783	-3.71314	-2.88557
7.74233	5.16566	5.12381	7.08437	6.07632	-3.61807	-2.9108
7.74857	5.23959	5.17685	7.14682	6.07069	-3.48078	-2.92789
7.75481	5.32658	5.28575	7.2264	6.02315	-3.31639	-2.95043
7.76105	5.39541	5.41254	7.28636	5.96931	-3.1858	-2.89976
7.76729	5.40616	5.39039	7.32792	5.89089	-3.09403	-2.89271
7.77354	5.39319	5.40975	7.38221	5.8147	-3.03004	-2.94265
7.77978	5.36766	5.48664	7.4448	5.77978	-2.96363	-2.98215
7.78602	5.33431	5.53428	7.47082	5.75156	-2.8793	-2.98031
7.79226	5.28116	5.59336	7.45929	5.74898	-2.78358	-2.95909
7.7985	5.27683	5.65582	7.47617	5.82872	-2.67424	-3.00834
7.80475	5.31898	5.70415	7.49437	5.83423	-2.58138	-3.07449
7.81099	5.29918	5.78804	7.47723	5.80108	-2.51434	-3.1255
7.81723	5.24221	5.80772	7.44384	5.77032	-2.47286	-3.12802
7.82347	5.1496	5.73138	7.43507	5.84556	-2.38297	-3.15385
7.82972	5.08729	5.70228	7.44917	5.91801	-2.22994	-3.16846
7.83596	5.03748	5.68688	7.44329	5.90189	-2.00493	-3.17112
7.8422	5.00011	5.67539	7.46827	5.85886	-1.84531	-3.18958
7.84844	4.98422	5.68768	7.5024	5.81287	-1.68428	-3.23594
7.85469	4.92918	5.68554	7.51027	5.77485	-1.45681	-3.31665
7.86093	4.86086	5.65805	7.47795	5.66801	-1.24567	-3.35642
7.86717	4.80645	5.60922	7.44265	5.61565	-1.0253	-3.37529
7.87341	4.72087	5.53818	7.43238	5.616	-0.783742	-3.37484
7.87965	4.69525	5.50003	7.45253	5.63393	-0.539271	-3.42734
7.8859	4.75328	5.51446	7.47609	5.5806	-0.287175	-3.45011
7.89214	4.72712	5.53553	7.48992	5.50681	-0.04341	-3.42854
7.89838	4.69993	5.50403	7.48973	5.45934	0.133053	-3.45684
7.90462	4.71079	5.41186	7.49139	5.51397	0.365441	-3.44455
7.91087	4.78958	5.33836	7.50266	5.57155	0.610238	-3.40469
7.91711	4.86968	5.2932	7.55232	5.54597	0.789459	-3.37046
7.92335	4.90468	5.2535	7.56808	5.49414	0.995737	-3.36487
7.92959	4.88377	5.24051	7.57004	5.43393	1.20531	-3.38362
7.93583	4.89786	5.2117	7.63673	5.38355	1.36599	-3.40864
7.94208	4.91259	5.1599	7.70137	5.38241	1.55633	-3.30236
7.94832	4.92306	5.07426	7.75535	5.37827	1.74528	-3.24799
7.95456	5.00977	5.0824	7.77691	5.37366	1.92058	-3.30311
7.9608	5.09644	5.1819	7.79343	5.41381	2.14804	-3.29537
7.96705	5.10308	5.27278	7.81086	5.36623	2.3814	-3.29906
7.97329	4.9831	5.32916	7.82646	5.29723	2.61022	-3.30002
7.97953	4.88013	5.38563	7.86247	5.35221	2.87586	-3.26319
7.98577	4.85146	5.46412	7.90401	5.35171	3.0967	-3.23619
7.99202	4.89744	5.53048	7.92395	5.33679	3.2878	-3.23843
7.99826	4.92352	5.57829	7.92273	5.37558	3.53594	-3.27162
8.0045	4.91225	5.61706	7.90323	5.33021	3.7622	-3.32593
8.01074	4.89219	5.65876	7.88565	5.29447	3.97916	-3.33845
8.01699	4.87789	5.64744	7.93926	5.2947	4.20473	-3.23458
8.02323	4.89427	5.59613	7.93903	5.23716	4.3949	-3.19216
8.02947	4.97407	5.59568	7.91427	5.20553	4.5977	-3.1835
8.03571	5.10407	5.62917	7.9441	5.20558	4.82668	-3.1863
8.04195	5.24271	5.66913	7.93438	5.14707	5.02988	-3.25402
8.0482	5.33274	5.72995	7.92347	5.1408	5.24915	-3.28003
8.05444	5.32573	5.77042	7.91849	5.11939	5.50525	-3.1991
8.06068	5.3151	5.78256	7.88392	5.01574	5.7592	-3.0628
8.06692	5.31532	5.79968	7.87027	4.99887	6.04928	-3.01544
8.07316	5.26321	5.8171	7.86386	5.00422	6.36859	-3.09368
8.07941	5.18886	5.83432	7.76874	4.97439	6.61812	-3.20544
8.08565	5.11826	5.87498	7.75387	4.98445	6.86836	-3.24761
8.09189	5.08446	5.88474	7.81443	4.98496	7.12918	-3.25737
8.09813	5.05724	5.87399	7.80313	4.96324	7.39612	-3.34892
8.10438	5.03132	5.87274	7.77843	5.01034	7.67119	-3.35049
8.11062	4.97612	5.8255	7.75933	5.07175	7.95501	-3.32511
8.11686	4.93635	5.79253	7.79181	5.11777	8.25431	-3.31711
8.1231	4.90957	5.81377	7.85203	5.16069	8.50458	-3.37003
8.12935	4.91988	5.89402	7.92797	5.16139	8.70046	-3.39055
8.13559	4.95718	5.9741	8.00929	5.14432	8.86399	-3.33728
8.14183	4.97981	6.00829	8.08758	5.2128	9.12495	-3.35374
8.14807	4.96645	6.04633	8.11374	5.24843	9.40311	-3.38483
8.15432	4.95311	6.0869	8.08085	5.24387	9.67231	-3.4082
8.16056	4.92194	6.11038	8.05133	5.18023	9.89076	-3.37042
8.1668	4.85798	6.12833	8.05173	5.1174	10.1351	-3.37392
8.17304	4.76516	6.14566	8.07659	5.08654	10.4261	-3.41572
8.17928	4.72459	6.17024	8.04311	5.05627	10.722	-3.48991
8.18553	4.73694	6.21984	7.99244	4.98572	10.99	-3.51703
8.19177	4.71005	6.15836	7.93729	4.92191	11.2437	-3.52985
8.19801	4.6581	6.11195	7.91978	4.89543	11.5577	-3.5812
8.20425	4.59609	6.18102	7.94235	4.84952	11.8542	-3.58098
8.21049	4.57456	6.20057	7.97169	4.82704	12.1264	-3.58205
8.21674	4.54866	6.1767	7.97308	4.811	12.3259	-3.61429
8.22298	4.51769	6.16042	7.99951	4.81721	12.559	-3.60395
8.22922	4.43997	6.13921	8.02847	4.79848	12.758	-3.57845
8.23546	4.47596	6.10589	8.07403	4.79375	12.8662	-3.54677
8.24171	4.50912	6.02815	8.12738	4.77475	12.9517	-3.56429
8.24795	4.49689	5.89875	8.1883	4.8251	13.0779	-3.5641
8.25419	4.4422	5.84129	8.24977	4.88657	13.2283	-3.51833
8.26043	4.40164	5.84675	8.17769	4.93793	13.3381	-3.44
8.26668	4.38879	5.8727	8.11966	4.85811	13.4075	-3.36574
8.27292	4.37609	5.86883	8.10361	4.76114	13.4507	-3.29355
8.27916	4.32713	5.8185	8.14337	4.66624	13.5419	-3.26967
8.2854	4.2752	5.74846	8.19209	4.65713	13.6442	-3.24939
8.29165	4.31206	5.65204	8.23088	4.64357	13.7675	-3.22906
8.29789	4.32445	5.54673	8.23866	4.66041	13.8923	-3.21439
8.30413	4.31797	5.43073	8.21738	4.71595	14.0211	-3.15686
8.31037	4.29152	5.32176	8.15128	4.71462	14.1596	-3.14781
8.31661	4.32759	5.20224	8.06724	4.65994	14.262	-3.21255
8.32286	4.37688	5.02267	8.11966	4.57707	14.3695	-3.2499
8.3291	4.40628	4.71676	8.19961	4.55734	14.4722	-3.27284
8.33534	4.42668	4.43333	8.27303	4.58721	14.5228	-3.26548
8.34158	4.4532	4.25774	8.23046	4.75385	14.5612	-3.2605
8.34783	4.49103	4.12574	8.18604	4.89317	14.562	-3.28489
8.35407	4.52488	4.00009	8.15921	4.96389	14.5342	-3.31818
8.36031	4.53581	3.92359	8.13057	4.8557	14.5626	-3.27502
8.36655	4.5285	3.95917	8.13177	4.80308	14.5308	-3.23499
8.37279	4.53684	3.98026	8.15247	4.78446	14.4408	-3.19071
8.37904	4.54127	3.92017	8.22681	4.74963	14.3602	-3.16387
8.38528	4.54257	3.82592	8.28212	4.70445	14.2626	-3.14642
8.39152	4.52522	3.81771	8.30219	4.6903	14.1817	-3.1511
8.39776	4.49484	3.86752	8.24746	4.70431	14.1154	-3.18055
8.40401	4.45738	3.88386	8.3126	4.65377	14.0635	-3.18832
8.41025	4.41113	3.90524	8.38017	4.56094	14.0243	-3.18687
8.41649	4.34019	3.94114	8.42066	4.44574	13.9891	-3.16172
8.42273	4.28916	3.95609	8.48866	4.43702	13.9124	-3.20878
8.42897	4.26651	3.91299	8.58777	4.39529	13.8414	-3.26941
8.43522	4.2167	3.91	8.68395	4.35814	13.7939	-3.33181
8.44146	4.17374	4.00253	8.66024	4.37793	13.7607	-3.28817
8.4477	4.14881	4.12957	8.63572	4.37188	13.6983	-3.22326
8.45394	4.14014	4.20731	8.64373	4.33754	13.5996	-3.15234
8.46019	4.15084	4.23454	8.67119	4.28793	13.4987	-3.1482
8.46643	4.16584	4.25247	8.67597	4.16697	13.3774	-3.11905
8.47267	4.16001	4.26469	8.67469	4.0597	13.2409	-3.091
8.47891	4.21382	4.30468	8.68874	3.98846	13.0919	-3.07002
8.48516	4.26833	4.38815	8.67971	3.97562	12.9613	-3.06088
8.4914	4.27716	4.45287	8.66992	3.99759	12.8443	-3.01225
8.49764	4.26679	4.48353	8.67001	4.05173	12.7326	-2.89853
8.50388	4.2614	4.52448	8.70194	4.02254	12.5965	-2.93064
8.51012	4.29332	4.57423	8.70077	4.00908	12.4505	-2.97722
8.51637	4.39947	4.61439	8.68653	4.00704	12.3199	-3.01017
8.52261	4.42989	4.64255	8.71945	4.06228	12.2195	-2.93046
8.52885	4.39435	4.66231	8.74242	4.08082	12.1211	-2.8761
8.53509	4.39717	4.68008	8.74448	4.08051	12.0247	-2.85639
8.54134	4.36443	4.70103	8.72309	4.11527	11.868	-2.85869
8.54758	4.3319	4.72768	8.71138	4.09464	11.6937	-2.80956
8.55382	4.33146	4.77187	8.71832	4.02532	11.519	-2.78052
8.56006	4.40115	4.80369	8.7667	3.88852	11.3085	-2.8371
8.5663	4.44426	4.80126	8.79273	3.83146	11.1617	-2.76389
8.57255	4.35602	4.77602	8.78653	3.83054	11.0405	-2.70937
8.57879	4.2473	4.77215	8.7689	3.8931	10.8511	-2.71899
8.58503	4.22365	4.82935	8.72691	3.77566	10.6947	-2.8016
8.59127	4.3066	4.94571	8.70001	3.73421	10.534	-2.78941
8.59752	4.41078	5.04627	8.69348	3.73667	10.3256	-2.67677
8.60376	4.47342	5.08184	8.72328	3.68389	10.2114	-2.57061
8.61	4.45183	5.12134	8.71734	3.66269	10.0969	-2.55879
8.61624	4.39039	5.14463	8.65813	3.6956	9.93198	-2.60455
8.62248	4.33882	5.12315	8.62839	3.85477	9.78057	-2.62001
8.62873	4.32656	5.12525	8.62207	3.98563	9.61814	-2.67015
8.63497	4.32944	5.18392	8.61094	4.02435	9.45781	-2.70039
8.64121	4.34041	5.2393	8.64344	3.90962	9.31988	-2.66731
8.64745	4.34546	5.21698	8.65495	3.93186	9.1422	-2.61985
8.6537	4.25422	5.15982	8.65634	3.96273	8.95308	-2.61227
8.65994	4.12931	5.1404	8.67681	3.99009	8.82055	-2.64601
8.66618	4.03806	5.15984	8.70113	3.96085	8.60938	-2.71678
8.67242	4.04645	5.10214	8.73182	3.92894	8.37644	-2.71577
8.67867	4.02811	5.04772	8.73304	3.89569	8.16995	-2.63024
8.68491	3.9503	5.10218	8.70128	3.85352	7.92379	-2.54498
8.69115	3.83202	5.09718	8.70383	3.7866	7.70587	-2.52214
8.69739	3.8458	5.02708	8.73794	3.73106	7.56075	-2.55381
8.70363	3.84086	5.00482	8.77098	3.74614	7.39628	-2.53524
8.70988	3.81111	5.04961	8.79401	3.7676	7.25661	-2.49246
8.71612	3.80699	5.06083	8.78437	3.77168	7.14663	-2.44442
8.72236	3.7878	4.9893	8.81727	3.71043	7.06325	-2.40812
8.7286	3.74497	4.95728	8.81518	3.80301	6.97543	-2.36165
8.73485	3.63993	4.98851	8.82361	3.87745	6.86217	-2.34881
8.74109	3.60837	5.01561	8.91769	3.88408	6.74871	-2.38287
8.74733	3.62864	4.9835	9.00512	3.76773	6.68857	-2.44451
8.75357	3.7117	4.99883	9.09123	3.69539	6.57768	-2.45621
8.75981	3.72696	5.05389	9.11777	3.65996	6.34301	-2.41234
8.76606	3.71426	5.047	9.01522	3.61113	6.16112	-2.45724
8.7723	3.67862	5.03329	8.95192	3.57138	5.97686	-2.5147
8.77854	3.70207	5.09718	8.98539	3.55747	5.77051	-2.56633
8.78478	3.73412	5.20212	8.95349	3.52228	5.52123	-2.56378
8.79103	3.7537	5.19407	8.90893	3.43119	5.31698	-2.59217
8.79727	3.81727	5.13826	8.84465	3.36244	5.15122	-2.6488
8.80351	3.84914	5.15947	8.82191	3.3712	5.10077	-2.65703
8.80975	3.84176	5.24916	8.76525	3.43951	4.69768	-2.6182
8.81599	3.8569	5.37035	8.69718	3.473	4.52535	-2.57365
8.82224	3.82561	5.32693	8.65116	3.43409	4.5333	-2.54061
8.82848	3.76237	5.27741	8.67286	3.49411	4.43873	-2.44873
8.83472	3.72963	5.31604	8.70892	3.49569	4.28056	-2.35262
8.84096	3.74803	5.30675	8.74025	3.44418	4.04133	-2.2609
8.84721	3.77997	5.2512	8.79289	3.5586	3.72215	-2.23335
8.85345	3.73429	5.27183	8.87735	3.61446	3.60193	-2.15263
8.85969	3.68314	5.27929	9.00008	3.60677	3.69191	-2.04127
8.86593	3.64374	5.24113	9.01723	3.57891	3.73441	-1.95634
8.87218	3.6109	5.19883	9.00157	3.55129	3.72564	-1.92989
8.87842	3.56185	5.19766	8.96373	3.55784	3.60982	-1.9468
8.88466	3.56896	5.22408	8.98777	3.60087	3.31841	-1.96494
8.8909	3.59977	5.23816	9.02744	3.59233	3.17717	-2.00862
8.89715	3.59518	5.243	9.0722	3.59907	3.14479	-2.07438
8.90339	3.51185	5.26981	9.05036	3.62714	3.18607	-2.18963
8.90963	3.42516	5.29402	9.02415	3.51233	3.1846	-2.22947
8.91587	3.46455	5.26447	8.98506	3.44329	3.03052	-2.24848
8.92211	3.46838	5.28413	8.90111	3.42551	2.72367	-2.29562
8.92836	3.45695	5.36218	8.84244	3.39569	2.44672	-2.38972
8.9346	3.47483	5.38566	8.81288	3.32134	2.24669	-2.41647
8.94084	3.4554	5.3524	8.84582	3.23271	2.15556	-2.36772
8.94708	3.45026	5.34622	8.8702	3.23558	2.13174	-2.36876
8.95332	3.48343	5.42418	8.86912	3.22567	2.11661	-2.40488
8.95957	3.54441	5.45815	8.82782	3.19932	2.0974	-2.44345
8.96581	3.55299	5.44909	8.84255	3.13902	1.96721	-2.35339
8.97205	3.47135	5.4683	8.85302	3.21837	1.95023	-2.37739
8.97829	3.43764	5.50798	8.86066	3.30834	1.9998	-2.43988
8.98454	3.42432	5.52612	8.91645	3.34379	2.058	-2.44578
8.99078	3.40791	5.52056	8.99843	3.37511	2.06798	-2.36239
8.99702	3.338	5.59483	9.07811	3.39875	2.05292	-2.30094
9.00326	3.24674	5.66962	9.06926	3.38336	2.08125	-2.31994
9.00951	3.14577	5.687	9.07047	3.31188	2.11931	-2.34809
9.01575	3.06365	5.6936	9.09539	3.27211	2.0895	-2.30919
9.02199	3.01906	5.74416	9.1441	3.28216	2.02134	-2.17974
9.02823	3.0304	5.82222	9.15142	3.3401	2.00865	-2.24485
9.03448	3.09663	5.91169	9.15474	3.29527	1.96635	-2.25716
9.04072	3.05987	5.95964	9.16635	3.21192	1.91917	-2.21488
9.04696	3.03742	5.97452	9.13541	3.14162	1.81601	-2.18569
9.0532	3.06305	5.97974	9.1052	3.07983	1.78981	-2.20745
9.05944	3.09503	5.94358	9.09085	3.05583	1.77385	-2.2471
9.06569	3.13236	5.91634	9.1063	3.07691	1.63774	-2.30502
9.07193	3.18193	5.92902	9.11333	3.12416	1.57654	-2.25967
9.07817	3.19935	5.95505	9.12251	3.11675	1.53958	-2.23094
9.08441	3.1592	5.99845	9.10627	3.03152	1.47403	-2.2768
9.09065	3.0827	6.04433	9.10981	2.92268	1.4641	-2.22706
9.0969	3.05581	6.03921	9.13475	2.86299	1.44759	-2.16955
9.10314	3.08992	6.0448	9.24512	2.85417	1.40713	-2.10256
9.10938	3.13974	6.09667	9.29261	2.81022	1.36965	-2.04666
9.11562	3.16371	6.14559	9.28921	2.76223	1.28702	-2.03325
9.12187	3.22834	6.21379	9.25509	2.73573	1.16109	-2.04638
9.12811	3.25725	6.28166	9.23795	2.76513	1.06568	-1.98888
9.13435	3.20087	6.25316	9.21835	2.70924	0.971779	-1.9643
9.14059	3.18971	6.176	9.22633	2.65166	0.888359	-1.95819
9.14684	3.20441	6.12269	9.25679	2.65342	0.787349	-1.9443
9.15308	3.22939	6.09074	9.28823	2.69986	0.684202	-1.94458
9.15932	3.20634	6.08337	9.30986	2.70731	0.594684	-1.96422
9.16556	3.19897	6.05799	9.24265	2.65644	0.575424	-1.98467
9.17181	3.2318	6.00311	9.25506	2.75826	0.572071	-2.01731
9.17805	3.15341	5.92393	9.30413	2.83413	0.576791	-2.02444
9.18429	3.04094	5.84576	9.302	2.84101	0.604452	-1.9979
9.19053	2.93288	5.81872	9.35854	2.79829	0.680689	-2.00004
9.19677	2.89044	5.88844	9.41948	2.80254	0.723714	-1.98903
9.20302	2.82469	5.94155	9.39409	2.8264	0.708261	-1.95359
9.20926	2.77708	5.9256	9.35258	2.84011	0.722781	-1.97293
9.2155	2.75778	5.91758	9.33017	2.81104	0.739256	-1.9747
9.22174	2.76567	5.88391	9.37988	2.79661	0.737723	-1.97328
9.22799	2.72408	5.80421	9.34895	2.86025	0.617176	-2.01189
9.23423	2.61082	5.72962	9.34098	2.76491	0.513311	-2.03338
9.24047	2.63815	5.72697	9.40408	2.65351	0.434301	-2.03627
9.24671	2.68535	5.74391	9.42668	2.59239	0.41719	-1.99749
9.25295	2.73479	5.71629	9.4007	2.55859	0.367849	-1.94796
9.2592	2.84289	5.61879	9.36094	2.55646	0.314786	-1.9335
9.26544	2.92562	5.52658	9.37089	2.58162	0.276752	-1.9615
9.27168	2.98188	5.51753	9.44308	2.54303	0.311803	-1.91803
9.27792	2.96378	5.474	9.508	2.5347	0.339261	-1.83385
9.28417	2.93688	5.43186	9.40793	2.55028	0.332741	-1.71555
9.29041	2.91018	5.47979	9.39525	2.54885	0.398901	-1.68439
9.29665	2.90079	5.54363	9.37315	2.60967	0.451749	-1.66374
9.30289	2.85516	5.56257	9.30558	2.68812	0.459959	-1.63537
9.30913	2.81079	5.54006	9.3851	2.75103	0.391434	-1.59674
9.31538	2.78725	5.52564	9.46248	2.80067	0.352306	-1.59584
9.32162	2.6648	5.57617	9.50149	2.83651	0.349358	-1.61186
9.32786	2.52755	5.65946	9.54686	2.85381	0.354972	-1.55879
9.3341	2.39652	5.74779	9.56207	2.93839	0.277806	-1.51738
9.34035	2.41201	5.83352	9.57355	3.00155	0.20862	-1.51586
9.34659	2.41978	5.86148	9.6601	3.01633	0.251431	-1.58521
9.35283	2.39364	5.81687	9.69054	3.01946	0.192091	-1.56821
9.35907	2.46267	5.73337	9.67742	3.03927	0.163307	-1.5556
9.36532	2.52056	5.67752	9.71859	3.07144	0.240189	-1.60067
9.37156	2.55633	5.6895	9.67945	3.02492	0.250276	-1.6218
9.3778	2.5699	5.70525	9.62423	2.94822	0.211299	-1.60555
9.38404	2.61023	5.72587	9.63761	2.87395	0.150727	-1.60526
9.39029	2.67488	5.78153	9.63886	2.87437	0.151494	-1.64574
9.39653	2.81441	5.76013	9.63564	2.82135	0.166296	-1.71747
9.40277	2.80021	5.73684	9.64363	2.75441	0.142709	-1.7876
9.40901	2.79008	5.83017	9.67369	2.76711	0.023356	-1.76035
9.41525	2.85983	5.98923	9.74749	2.74841	0.02962	-1.72027
9.4215	2.81325	6.1407	9.84619	2.68783	0.066313	-1.67085
9.42774	2.78452	6.2248	9.91863	2.58518	-0.016945	-1.58848
9.43398	2.78523	6.27598	10.0012	2.57761	-0.069057	-1.59282
9.44022	2.85064	6.31954	10.0589	2.57136	-0.132082	-1.57126
9.44646	2.89636	6.3262	10.0666	2.51515	-0.184838	-1.42722
9.45271	2.87799	6.26569	10.0439	2.41581	-0.214264	-1.3402
9.45895	2.87099	6.19518	10.0045	2.37674	-0.2126	-1.28635
9.46519	2.88731	6.11943	10.0455	2.3661	-0.221705	-1.25931
9.47143	2.88286	5.98539	10.0154	2.31085	-0.230391	-1.25172
9.47768	2.92171	5.83276	9.96591	2.26293	-0.303607	-1.26609
9.48392	2.91148	5.74096	9.97374	2.23893	-0.413221	-1.3052
9.49016	2.87826	5.72203	9.87001	2.24121	-0.457739	-1.339
9.4964	2.88927	5.75389	9.77975	2.24656	-0.428244	-1.33174
9.50264	2.84234	5.81462	9.76753	2.28134	-0.349093	-1.32673
9.50889	2.82071	5.87312	9.75067	2.36761	-0.339209	-1.38313
9.51513	2.8526	5.9313	9.756	2.44318	-0.378492	-1.43057
9.52137	2.80809	6.05353	9.76692	2.48413	-0.405414	-1.4341
9.52762	2.83645	6.25358	9.69853	2.44535	-0.403213	-1.35376
9.53386	2.95186	6.42436	9.67581	2.399	-0.397758	-1.34945
9.5401	2.97051	6.50554	9.66322	2.39468	-0.385709	-1.35442
9.54634	3.01344	6.53413	9.59482	2.44723	-0.332202	-1.3321
9.55258	3.0444	6.56204	9.60916	2.44119	-0.290002	-1.29062
9.55883	3.05758	6.53524	9.65555	2.4399	-0.255151	-1.24592
9.56507	3.04313	6.47295	9.73596	2.46223	-0.219054	-1.19996
9.57131	2.99743	6.4811	9.77171	2.43097	-0.243029	-1.2256
9.57755	2.9392	6.51711	9.78837	2.37046	-0.266281	-1.22792
9.5838	2.88828	6.48207	9.83253	2.32645	-0.232168	-1.2233
9.59004	2.81591	6.37471	9.83161	2.31535	-0.270259	-1.26501
9.59628	2.71829	6.29981	9.85729	2.25977	-0.315242	-1.26493
9.60252	2.66082	6.30065	9.95458	2.18742	-0.371786	-1.23812
9.60877	2.64698	6.32871	10.014	2.16943	-0.434636	-1.2103
9.61501	2.65789	6.31795	10.0589	2.15278	-0.494286	-1.22659
9.62125	2.56223	6.29649	10.0952	2.08548	-0.562737	-1.26547
9.62749	2.52226	6.30949	10.0755	1.9859	-0.662963	-1.29217
9.63373	2.56769	6.31748	10.0969	2.01144	-0.659304	-1.20599
9.63998	2.59902	6.31071	10.1323	2.0271	-0.685811	-1.13087
9.64622	2.64754	6.31044	10.1469	1.98759	-0.792314	-1.11845
9.65246	2.70821	6.3651	10.2076	2.04585	-0.815912	-1.05179
9.6587	2.70747	6.42048	10.2476	2.15191	-0.8221	-0.989546
9.66494	2.68565	6.41122	10.1408	2.22479	-0.811881	-0.944912
9.67119	2.65554	6.38685	10.0923	2.19637	-0.839743	-0.872108
9.67743	2.55155	6.41646	10.0684	2.21452	-0.854745	-0.823554
9.68367	2.57531	6.50788	10.0646	2.26214	-0.847879	-0.807407
9.68991	2.60713	6.58168	10.0201	2.30555	-0.787757	-0.78495
9.69616	2.54756	6.60391	9.96467	2.23786	-0.743376	-0.817242
9.7024	2.49586	6.60672	9.89421	2.17474	-0.728855	-0.843157
9.70864	2.40895	6.62856	9.84422	2.17278	-0.681833	-0.826109
9.71488	2.28578	6.58149	9.78068	2.15553	-0.630096	-0.866301
9.72113	2.19849	6.51544	9.72672	2.11241	-0.588285	-0.92858
9.72737	2.11038	6.50575	9.83092	2.03594	-0.597369	-1.00282
9.73361	2.03305	6.49963	9.89164	1.95999	-0.570001	-1.06606
9.73985	2.08767	6.46826	9.88913	1.9267	-0.532449	-1.05764
9.7461	2.1335	6.39535	9.83469	1.92697	-0.494505	-1.01419
9.75234	2.17031	6.31557	9.8848	1.9087	-0.528578	-1.00317
9.75858	2.15176	6.26921	10.0011	1.95927	-0.530565	-1.02236
9.76482	2.14269	6.25864	10.0319	2.06226	-0.486581	-1.05904
9.77106	2.14909	6.23923	10.0567	2.15969	-0.430568	-1.11401
9.77731	2.17614	6.27282	10.0758	2.17697	-0.398422	-1.15549
9.78355	2.21064	6.36428	10.0356	2.18883	-0.38465	-1.13653
9.78979	2.24753	6.42755	9.96529	2.24805	-0.270398	-1.03087
9.79603	2.28706	6.44087	9.94095	2.24388	-0.192992	-1.00238
9.80227	2.25566	6.42708	9.96518	2.22838	-0.146663	-1.01374
9.80852	2.19455	6.43687	10.0632	2.26608	-0.141591	-1.02825
9.81476	2.15233	6.45772	10.1033	2.25878	-0.103039	-1.06623
9.821	2.10784	6.48198	10.1049	2.21347	-0.06446	-1.08016
9.82724	2.06878	6.50962	10.1608	2.16528	-0.05024	-1.05642
9.83349	2.0477	6.54632	10.2206	2.13017	-0.086614	-1.00341
9.83973	2.06927	6.53976	10.3002	2.13877	-0.081718	-0.923075
9.84597	2.07975	6.47782	10.4426	2.15923	-0.025965	-0.845574
9.85221	2.08483	6.43274	10.556	2.11721	-0.070048	-0.859777
9.85846	2.1431	6.4562	10.6336	2.11347	-0.111552	-0.855528
9.8647	2.1906	6.54307	10.6141	2.10709	-0.142648	-0.831017
9.87094	2.20691	6.59934	10.5908	2.05772	-0.183682	-0.804704
9.87718	2.19655	6.62982	10.576	2.05407	-0.194061	-0.749245
9.88343	2.28814	6.62327	10.5439	2.04902	-0.191842	-0.695898
9.88967	2.39572	6.57273	10.5088	2.02779	-0.250245	-0.672042
9.89591	2.50342	6.48183	10.4349	2.0456	-0.261104	-0.666638
9.90215	2.49329	6.40991	10.3356	2.06818	-0.267984	-0.697649
9.90839	2.46239	6.42739	10.2724	2.07912	-0.308995	-0.751711
9.91464	2.42293	6.44849	10.215	2.0486	-0.299291	-0.774752
9.92088	2.29702	6.47718	10.1768	2.0122	-0.274146	-0.760502
9.92712	2.25617	6.50148	10.2232	1.9853	-0.229442	-0.71916
9.93336	2.27376	6.44764	10.251	1.98353	-0.17759	-0.657183
9.93961	2.22436	6.35507	10.2836	1.9834	-0.180945	-0.59783
9.94585	2.14847	6.28968	10.2097	1.95579	-0.2066	-0.546278
9.95209	2.07139	6.29748	10.1717	1.89019	-0.19877	-0.528538
9.95833	2.02622	6.38729	10.1539	1.80337	-0.192256	-0.509981
9.96457	1.99631	6.49284	10.1438	1.70711	-0.176888	-0.472804
9.97082	1.96536	6.51806	10.1545	1.61137	-0.178757	-0.396007
9.97706	1.93957	6.51036	10.1672	1.61169	-0.142462	-0.272841
9.9833	2.02118	6.45315	10.1048	1.66196	-0.110861	-0.15568
9.98954	2.03973	6.4	10.1029	1.70709	-0.130439	-0.072057
9.99579	1.97961	6.44404	10.0895	1.67961	-0.127584	-0.049283
10.002	1.95291	6.53942	10.0361	1.70532	-0.097178	-0.068037
10.0083	1.94766	6.59968	10.0798	1.80128	-0.028802	-0.102414
10.0145	1.94225	6.57474	10.1541	1.91195	0.063744	-0.110127
10.0208	1.97421	6.54845	10.2415	1.96042	0.113124	-0.095097
10.027	1.99852	6.58139	10.3926	1.97317	0.131837	-0.088465
10.0332	2.00707	6.56596	10.447	1.97863	0.14535	-0.143603
10.0395	2.04753	6.55145	10.4473	2.0325	0.127581	-0.23399
10.0457	1.97444	6.57048	10.5361	2.08442	0.106109	-0.316117
10.052	1.91795	6.60435	10.5625	2.10727	0.101872	-0.371161
10.0582	1.95646	6.63435	10.5503	2.12244	0.089921	-0.419523
10.0645	2.02809	6.65728	10.5141	2.06805	0.055352	-0.456585
10.0707	2.10887	6.70464	10.5075	1.94695	-0.015886	-0.441584
10.0769	2.19021	6.76364	10.4967	1.82126	-0.010056	-0.407197
10.0832	2.10216	6.76605	10.4513	1.75246	-0.012372	-0.390716
10.0894	2.0825	6.68901	10.3783	1.73734	-0.059983	-0.395122
10.0957	2.12629	6.70867	10.3401	1.7557	-0.116456	-0.326575
10.1019	2.0649	6.79247	10.3234	1.76976	-0.14251	-0.250017
10.1081	2.05536	6.85695	10.2989	1.77483	-0.131825	-0.215369
10.1144	2.07328	6.8647	10.2827	1.73723	-0.09805	-0.22553
10.1206	2.05398	6.85282	10.2757	1.74056	-0.056967	-0.215923
10.1269	2.04048	6.83473	10.2281	1.80034	-0.023296	-0.186221
10.1331	2.02255	6.81688	10.1982	1.8917	-0.036687	-0.179296
10.1394	1.98522	6.82448	10.2101	1.96237	-0.037303	-0.153642
10.1456	2.07755	6.85868	10.2747	2.00449	0.007316	-0.106575
10.1518	2.14582	6.88727	10.2892	2.03712	0.100187	-0.068529
10.1581	2.14629	6.89702	10.2787	2.07575	0.236549	-0.094073
10.1643	2.28269	6.90562	10.2429	2.07171	0.318188	-0.122692
10.1706	2.39976	6.92695	10.247	2.04393	0.316423	-0.109208
10.1768	2.4594	6.91944	10.2686	2.06547	0.291072	-0.052035
10.1831	2.50948	6.88082	10.2855	2.06017	0.289134	0.036177
10.1893	2.54182	6.82069	10.3359	2.02324	0.328232	0.155078
10.1955	2.55408	6.76	10.3557	2.00204	0.426523	0.198405
10.2018	2.49604	6.73844	10.3471	1.99252	0.499043	0.193995
10.208	2.41711	6.80601	10.396	1.97588	0.562048	0.195277
10.2143	2.36515	6.88184	10.463	1.9515	0.563723	0.203443
10.2205	2.31513	6.90191	10.5425	1.95287	0.574564	0.221142
10.2267	2.20349	6.84467	10.6408	1.95613	0.613769	0.248077
10.233	2.10894	6.82051	10.6914	1.93425	0.670633	0.269749
10.2392	2.0786	6.80854	10.7166	1.91428	0.675648	0.268477
10.2455	2.01596	6.81916	10.7155	1.92962	0.652744	0.231552
10.2517	1.94364	6.93109	10.7671	1.957	0.640225	0.148668
10.258	1.88769	7.05025	10.8447	1.89895	0.618301	0.121935
10.2642	1.92797	7.13528	10.9356	1.82513	0.582683	0.148494
10.2704	1.94135	7.14324	10.9057	1.76859	0.562832	0.228752
10.2767	1.92612	7.09764	10.851	1.71117	0.606602	0.301168
10.2829	1.96361	7.04107	10.8273	1.68692	0.605502	0.338221
10.2892	2.00199	7.03663	10.8603	1.70366	0.575952	0.35655
10.2954	2.01739	7.04766	10.8927	1.72518	0.632066	0.331621
10.3017	1.9969	7.09688	10.9138	1.69962	0.715435	0.345584
10.3079	2.01234	7.14809	10.8868	1.66199	0.770662	0.428658
10.3141	2.04488	7.09134	10.8593	1.67613	0.775946	0.487146
10.3204	2.06589	6.99521	10.8325	1.71887	0.792241	0.545669
10.3266	2.11062	6.90444	10.7553	1.75034	0.805625	0.592633
10.3329	2.15986	6.88643	10.7881	1.76401	0.822867	0.560652
10.3391	2.14269	6.91941	10.8709	1.78612	0.786266	0.550568
10.3454	2.11301	6.976	10.9064	1.71409	0.771836	0.579933
10.3516	2.08958	7.03133	10.8715	1.57823	0.793546	0.605548
10.3578	2.06274	7.03284	10.8324	1.50135	0.739095	0.665253
10.3641	2.07495	7.01304	10.8292	1.48587	0.708904	0.702355
10.3703	2.07894	7.03479	10.8586	1.45952	0.708172	0.691307
10.3766	2.05374	7.11423	10.8689	1.38317	0.755993	0.714983
10.3828	2.10123	7.19569	10.8722	1.34829	0.785179	0.747611
10.389	2.12098	7.19602	10.9034	1.35549	0.782838	0.766196
10.3953	2.12814	7.14196	10.868	1.36203	0.782107	0.80023
10.4015	2.13942	7.12781	10.7878	1.40546	0.804095	0.826485
10.4078	2.18153	7.206	10.6803	1.47394	0.828069	0.846324
10.414	2.2572	7.31714	10.6404	1.5234	0.871532	0.905671
10.4203	2.30253	7.39756	10.6367	1.58569	0.939811	0.968329
10.4265	2.30467	7.43181	10.6025	1.66442	1.002	1.00463
10.4327	2.31592	7.48209	10.6075	1.74649	1.03661	1.00729
10.439	2.36486	7.4875	10.6144	1.85533	0.996679	1.03054
10.4452	2.33949	7.49119	10.5892	1.94449	0.970649	1.10341
10.4515	2.27796	7.59925	10.5804	2.0092	0.969751	1.22558
[truncated: 4,147 more rows]
