# Supplementary material for: Dissecting the phase separation and oligomerization activities of the carboxysome positioning protein McdB
Source: eLife. 2023 Sep 5;12:e81362. doi: 10.7554/eLife.81362 (PMC10554743; doi:10.7554/eLife.81362)
Supplement: Figure 2—source data 1. [file elife-81362-fig2-data1.xlsx]

## Sheet: Sheet1
		mdeg						molar ellipticity = mdeg*MW/(10*cell_length*concentration)
wavelength	Buffer	FL	NTD	NTD-CD	CD	CD-CTD	CTD	FL	NTD	NTD-CD	CD	CD-CTD	CTD
190	0.662494	38.8735	-4.49932	31.7881	24.0135	52.3679	83.9294	2.70948e+06	-42275.6	1.7472e+06	1.09607e+06	3.16197e+06	1.24283e+06
190.1	0.678855	38.9305	-4.11843	29.6208	24.997	53.7381	83.0517	2.71346e+06	-38696.8	1.62808e+06	1.14097e+06	3.24471e+06	1.22983e+06
190.2	0.66777	39.0428	-1.75775	30.0446	25.1248	54.1803	83.4991	2.72129e+06	-16515.8	1.65137e+06	1.1468e+06	3.27141e+06	1.23646e+06
190.3	0.596106	38.5312	-2.69481	29.8683	25.7411	55.8663	83.4135	2.68562e+06	-25320.4	1.64168e+06	1.17493e+06	3.37321e+06	1.23519e+06
190.4	0.706703	37.6344	-4.77532	31.1648	23.7288	54.0458	83.3801	2.62312e+06	-44868.9	1.71294e+06	1.08308e+06	3.26329e+06	1.23469e+06
190.5	0.526553	38.7832	-3.21219	31.8175	23.759	54.5948	83.854	2.70319e+06	-30181.8	1.74882e+06	1.08446e+06	3.29644e+06	1.24171e+06
190.6	0.503924	38.9063	-5.66504	32.5281	24.4685	54.3886	84.4067	2.71177e+06	-53228.8	1.78787e+06	1.11684e+06	3.28398e+06	1.24989e+06
190.7	0.622352	38.6877	-6.70403	32.8358	26.2345	54.7435	85.0898	2.69654e+06	-62991.1	1.80479e+06	1.19745e+06	3.30542e+06	1.26001e+06
190.8	0.54941	38.4138	-6.14446	32.1214	26.1114	56.4163	86.9773	2.67744e+06	-57733.3	1.76552e+06	1.19183e+06	3.40642e+06	1.28796e+06
190.9	0.660084	38.845	-8.72842	32.239	26.1756	54.5292	87.4095	2.7075e+06	-82012.3	1.77199e+06	1.19476e+06	3.29247e+06	1.29436e+06
191	0.57507	39.7889	-7.24117	32.129	26.6125	53.3659	86.8374	2.77329e+06	-68038	1.76594e+06	1.2147e+06	3.22223e+06	1.28589e+06
191.1	0.58165	39.7794	-6.44273	32.2127	27.484	54.6949	86.9607	2.77263e+06	-60535.9	1.77054e+06	1.25448e+06	3.30248e+06	1.28771e+06
191.2	0.654045	38.8486	-7.61045	32.6418	26.3543	54.448	87.0005	2.70774e+06	-71507.7	1.79412e+06	1.20291e+06	3.28757e+06	1.2883e+06
191.3	0.630644	38.4873	-6.07576	33.0803	26.9554	54.6551	86.9328	2.68256e+06	-57087.9	1.81822e+06	1.23035e+06	3.30007e+06	1.2873e+06
191.4	0.701626	38.6694	-5.56397	33.5797	26.738	54.5634	86.4563	2.69526e+06	-52279	1.84567e+06	1.22043e+06	3.29454e+06	1.28024e+06
191.5	0.729346	38.2567	-4.68006	32.3647	26.0336	55.6834	86.8658	2.66649e+06	-43973.8	1.77889e+06	1.18828e+06	3.36216e+06	1.28631e+06
191.6	0.898528	38.3632	-5.92456	31.8127	25.4369	58.3522	87.0791	2.67391e+06	-55667.1	1.74855e+06	1.16104e+06	3.5233e+06	1.28947e+06
191.7	0.96967	38.0915	-2.87951	32.321	25.3573	56.3279	87.0017	2.65498e+06	-27055.9	1.77649e+06	1.15741e+06	3.40108e+06	1.28832e+06
191.8	1.13104	38.491	-1.08528	30.1986	23.7079	56.7729	86.3776	2.68282e+06	-10197.3	1.65983e+06	1.08212e+06	3.42795e+06	1.27908e+06
191.9	1.11162	38.3817	-1.63935	30.1398	22.8847	56.9509	86.2201	2.6752e+06	-15403.3	1.6566e+06	1.04455e+06	3.43869e+06	1.27675e+06
192	1.05734	38.2946	-2.65337	30.1889	22.527	56.7951	86.7938	2.66913e+06	-24931.1	1.6593e+06	1.02822e+06	3.42929e+06	1.28524e+06
192.1	0.976885	39.023	-2.78835	30.9362	23.9771	57.2718	87.1299	2.7199e+06	-26199.3	1.70038e+06	1.09441e+06	3.45807e+06	1.29022e+06
192.2	0.905406	38.8312	0.650704	30.2879	25.731	56.9278	86.888	2.70653e+06	6114.01	1.66474e+06	1.17447e+06	3.4373e+06	1.28664e+06
192.3	0.811144	38.3823	-2.21121	30.0614	26.1813	56.5671	86.9244	2.67524e+06	-20776.6	1.65229e+06	1.19502e+06	3.41552e+06	1.28718e+06
192.4	0.744006	38.262	-2.37535	28.7398	25.8046	57.2722	87.2889	2.66686e+06	-22318.8	1.57965e+06	1.17782e+06	3.4581e+06	1.29257e+06
192.5	0.604135	38.7703	-4.3273	28.5345	27.232	55.823	86.8832	2.70229e+06	-40659.4	1.56837e+06	1.24298e+06	3.37059e+06	1.28657e+06
192.6	0.526077	39.0158	-4.42715	29.1883	26.1064	55.0401	86.994	2.7194e+06	-41597.5	1.60431e+06	1.1916e+06	3.32332e+06	1.28821e+06
192.7	0.504215	38.6109	-3.90047	28.8962	27.6905	54.8538	86.1251	2.69118e+06	-36648.8	1.58825e+06	1.2639e+06	3.31207e+06	1.27534e+06
192.8	0.654814	37.9966	-3.93161	28.5423	26.5301	54.6427	84.2929	2.64836e+06	-36941.4	1.5688e+06	1.21094e+06	3.29933e+06	1.24821e+06
192.9	0.775858	37.7985	-6.96991	28.532	24.205	54.7223	83.7327	2.63456e+06	-65489.3	1.56824e+06	1.10481e+06	3.30414e+06	1.23991e+06
193	0.684351	38.0062	-6.26916	28.2616	23.1669	53.8578	82.5396	2.64904e+06	-58905	1.55337e+06	1.05743e+06	3.25194e+06	1.22225e+06
193.1	0.903677	37.1901	-6.34648	29.0488	23.6614	53.8794	82.4068	2.59215e+06	-59631.5	1.59664e+06	1.08e+06	3.25324e+06	1.22028e+06
193.2	0.984754	36.17	-4.92697	28.9552	23.4829	53.5392	81.7653	2.52105e+06	-46293.8	1.5915e+06	1.07186e+06	3.2327e+06	1.21078e+06
193.3	0.974159	35.9007	-4.00949	28.6971	22.8353	53.5008	81.5967	2.50228e+06	-37673.2	1.57731e+06	1.0423e+06	3.23038e+06	1.20828e+06
193.4	0.918907	35.8808	-3.75616	27.9024	24.0421	51.876	82.3661	2.50089e+06	-35292.9	1.53363e+06	1.09738e+06	3.13227e+06	1.21968e+06
193.5	0.799774	36.3144	-1.7066	27.0271	24.0064	50.5813	82.2305	2.53112e+06	-16035.3	1.48552e+06	1.09575e+06	3.0541e+06	1.21767e+06
193.6	0.694817	36.096	-5.70986	26.3377	24.7502	50.0998	81.8397	2.51589e+06	-53649.8	1.44762e+06	1.1297e+06	3.02502e+06	1.21188e+06
193.7	0.489746	35.4906	-6.89153	26.8762	23.2959	50.0942	81.3157	2.47369e+06	-64752.8	1.47722e+06	1.06332e+06	3.02469e+06	1.20412e+06
193.8	0.558949	35.0354	-6.68842	26.6423	23.4176	49.2263	81.0054	2.44196e+06	-62844.4	1.46436e+06	1.06887e+06	2.97228e+06	1.19953e+06
193.9	0.499083	35.164	-8.41135	25.2657	22.0727	49.2953	80.2466	2.45093e+06	-79033.1	1.3887e+06	1.00749e+06	2.97645e+06	1.18829e+06
194	0.465628	35.0078	-10.5033	25.4778	20.8213	48.9866	79.5099	2.44004e+06	-98689.3	1.40036e+06	950366	2.95781e+06	1.17738e+06
194.1	0.446435	33.9232	-12.8397	25.1323	21.4382	50.4776	78.4821	2.36444e+06	-120642	1.38137e+06	978524	3.04784e+06	1.16216e+06
194.2	0.490293	33.1392	-13.0047	24.6963	21.2231	49.5026	78.2658	2.3098e+06	-122192	1.35741e+06	968707	2.98897e+06	1.15896e+06
194.3	0.554877	33.1939	-12.5771	24.9264	19.305	48.8712	77.4113	2.31362e+06	-118174	1.37006e+06	881158	2.95084e+06	1.14631e+06
194.4	0.674327	33.305	-14.2725	23.7011	19.8027	47.0353	76.1514	2.32136e+06	-134105	1.30271e+06	903873	2.83999e+06	1.12765e+06
194.5	0.681267	32.7267	-15.964	22.985	19.8551	46.6021	75.4458	2.28105e+06	-149997	1.26335e+06	906268	2.81384e+06	1.1172e+06
194.6	0.695814	32.5216	-15.4685	23.5786	20.5651	46.0135	74.9979	2.26675e+06	-145342	1.29597e+06	938673	2.77829e+06	1.11057e+06
194.7	0.736536	32.2666	-15.9094	22.8695	20.3665	44.5954	73.6819	2.24898e+06	-149485	1.257e+06	929607	2.69267e+06	1.09108e+06
194.8	0.765157	31.6894	-15.2502	21.5245	19.8232	44.2451	72.6983	2.20875e+06	-143290	1.18307e+06	904812	2.67152e+06	1.07652e+06
194.9	0.814904	31.5483	-15.2605	21.6262	19.3526	42.4854	71.0047	2.19892e+06	-143388	1.18866e+06	883330	2.56527e+06	1.05144e+06
195	0.929355	30.4176	-15.3061	20.8838	19.3025	41.5642	70.336	2.12011e+06	-143816	1.14786e+06	881045	2.50965e+06	1.04154e+06
195.1	0.941296	29.4664	-14.7934	20.0055	18.229	41.7451	69.7802	2.05381e+06	-138999	1.09958e+06	832045	2.52057e+06	1.03331e+06
195.2	0.859486	29.5688	-15.1765	19.2355	16.6049	41.5515	69.2116	2.06095e+06	-142598	1.05726e+06	757915	2.50888e+06	1.02489e+06
195.3	0.824405	28.7506	-14.7703	18.1417	16.2412	40.2701	67.699	2.00392e+06	-138782	997140	741313	2.43151e+06	1.00249e+06
195.4	0.820508	28.1699	-13.9113	17.7805	15.3663	39.0479	66.9965	1.96344e+06	-130711	977287	701379	2.35771e+06	992084
195.5	0.725705	28.0101	-15.7255	17.6313	13.628	37.9062	65.9535	1.9523e+06	-147757	969086	622036	2.28878e+06	976639
195.6	0.793263	27.1214	-16.0697	16.9539	12.5537	38.0001	64.0658	1.89036e+06	-150991	931856	573003	2.29445e+06	948687
195.7	0.539669	26.5595	-16.0826	16.3054	12.6143	38.0985	62.8763	1.8512e+06	-151112	896212	575769	2.30039e+06	931073
195.8	0.549882	26.5052	-17.4487	15.4459	11.3822	36.6703	61.1828	1.84741e+06	-163948	848969	519530	2.21415e+06	905995
195.9	0.799622	25.3442	-17.0869	15.2704	10.3315	34.1357	58.8231	1.76649e+06	-160549	839321	471570	2.06111e+06	871052
196	0.805181	24.7729	-18.4884	14.5302	9.55492	33.9119	57.4845	1.72667e+06	-173717	798639	436125	2.0476e+06	851231
196.1	0.945672	24.1054	-18.5765	13.4463	9.22493	33.2117	56.6419	1.68015e+06	-174545	739064	421063	2.00532e+06	838754
196.2	1.07721	23.515	-19.0609	13.6109	8.65827	32.2835	55.78	1.63899e+06	-179096	748109	395198	1.94928e+06	825990
196.3	1.02374	23.2979	-19.1849	13.0649	8.59249	30.8174	55.1327	1.62386e+06	-180262	718097	392196	1.86075e+06	816404
196.4	1.13049	22.5778	-19.0852	12.6638	7.74905	29.3083	53.8007	1.57367e+06	-179324	696054	353698	1.76964e+06	796681
196.5	1.14818	21.4952	-20.2746	11.843	7.11795	28.3806	52.1866	1.49822e+06	-190500	650940	324892	1.71362e+06	772779
196.6	1.15689	20.9143	-22.4975	10.7582	6.03396	27.9296	50.8079	1.45773e+06	-211386	591314	275414	1.68639e+06	752364
196.7	1.13162	20.3678	-23.7657	10.8076	5.80731	26.9151	49.9107	1.41963e+06	-223303	594028	265069	1.62513e+06	739077
196.8	1.11341	19.7031	-23.7556	10.1978	4.80226	26.0929	48.1097	1.37331e+06	-223208	560511	219194	1.57549e+06	712408
196.9	0.979244	18.9065	-23.9045	9.60156	4.32385	24.9848	47.0738	1.31778e+06	-224607	527740	197358	1.50858e+06	697068
197	0.912216	17.9427	-24.7003	8.73458	3.94603	24.0909	45.9712	1.25061e+06	-232084	480088	180113	1.45461e+06	680741
197.1	0.805668	17.1168	-24.9418	7.64116	3.86035	23.5339	44.572	1.19304e+06	-234353	419989	176202	1.42098e+06	660023
197.2	0.773492	16.6678	-25.6821	7.08359	4.35942	22.0049	43.1826	1.16175e+06	-241309	389342	198981	1.32866e+06	639448
197.3	0.596585	16.0957	-26.856	6.54427	3.88997	21.0665	41.2357	1.12187e+06	-252339	359700	177554	1.272e+06	610618
197.4	0.388125	15.591	-26.1828	6.26691	3.67773	20.0224	40.069	1.08669e+06	-246014	344454	167867	1.20895e+06	593341
197.5	0.362719	14.6306	-26.9161	6.19865	3.46868	19.1219	38.4596	1.01975e+06	-252904	340703	158324	1.15458e+06	569509
197.6	0.322481	13.978	-28.0856	4.74844	2.57187	17.6893	36.2215	974268	-263892	260993	117390	1.06808e+06	536368
197.7	0.283371	13.3733	-28.8962	4.87262	2.11044	16.6484	34.7642	932121	-271508	267819	96328.9	1.00523e+06	514789
197.8	0.24757	12.7604	-29.4083	4.46976	0.83622	15.968	33.2329	889402	-276320	245676	38168.4	964150	492113
197.9	0.289664	12.2596	-30.0326	4.53651	0.198012	15.5505	31.8235	854497	-282186	249345	9038.06	938941	471243
198	0.225107	11.549	-29.1329	3.66407	-0.464703	14.4857	30.9332	804965	-273733	201392	-21210.9	874646	458059
198.1	0.30614	10.9215	-29.3095	3.45211	-1.57565	12.8884	29.1753	761226	-275392	189742	-71919	778199	432027
198.2	0.295984	10.0254	-29.5461	2.72505	-2.71247	11.7019	27.5278	698771	-277615	149779	-123808	706562	407632
198.3	0.197371	9.73963	-29.0948	2.25506	-3.43055	10.2152	26.0719	678852	-273374	123947	-156584	616796	386073
198.4	0.244159	8.70105	-28.7958	1.6989	-4.37408	9.37836	24.3922	606463	-270565	93378.4	-199650	566265	361200
198.5	0.294268	7.93945	-29.0939	1.20958	-5.32919	8.73628	22.9138	553380	-273366	66483.5	-243245	527497	339308
198.6	0.256839	7.16616	-28.5086	0.789541	-6.81154	6.70977	21.6709	499481	-267867	43396.3	-310906	405136	320902
198.7	0.238391	6.60709	-28.3513	-0.064809	-7.95921	6.20286	20.3759	460514	-266389	-3562.16	-363290	374529	301726
198.8	0.32142	5.50923	-29.1832	-0.439827	-9.62763	5.69097	18.8207	383993	-274206	-24174.7	-439444	343621	278697
198.9	0.332577	4.82035	-29.3161	-1.1057	-10.1874	4.61625	17.801	335979	-275454	-60773.9	-464996	278729	263598
199	0.39784	4.20163	-29.3924	-1.40614	-11.2683	3.70748	16.5055	292854	-276171	-77287.1	-514332	223858	244413
199.1	0.387448	3.80797	-29.4093	-2.26554	-11.2378	2.92689	15.4121	265416	-276330	-124523	-512940	176726	228222
199.2	0.434412	3.25798	-29.4117	-2.95409	-12.0532	1.84992	13.9899	227081	-276352	-162369	-550157	111698	207162
199.3	0.364753	2.83576	-29.456	-3.2867	-12.3444	1.60534	12.7658	197652	-276768	-180650	-563446	96930.2	189037
199.4	0.409921	2.13778	-29.7144	-4.19827	-12.192	0.546581	11.3303	149003	-279197	-230754	-556493	33002.6	167779
199.5	0.345908	2.0624	-29.8985	-4.53727	-11.7231	-0.54329	10.2613	143749	-280926	-249386	-535090	-32803.9	151949
199.6	0.309524	1.97577	-29.6461	-5.04635	-11.8727	-1.86039	8.90401	137711	-278555	-277368	-541919	-112331	131851
199.7	0.369602	1.50913	-30.1429	-6.05711	-11.8947	-2.7433	7.5304	105186	-283223	-332923	-542922	-165641	111510
199.8	0.23389	1.22865	-30.4778	-6.75475	-12.0796	-3.5331	6.42891	85636.9	-286369	-371268	-551361	-213329	95199.3
199.9	0.252909	0.294593	-29.9402	-7.17806	-12.9231	-4.21089	4.89257	20533.1	-281318	-394535	-589862	-254253	72449.2
200	0.18999	-0.605972	-30.1661	-7.35637	-13.4216	-4.772	3.30942	-42236.2	-283441	-404336	-612615	-288133	49005.9
200.1	0.228454	-1.2302	-31.0482	-8.42374	-13.6362	-6.0214	2.23577	-85745.2	-291728	-463003	-622409	-363572	33107.2
200.2	0.201706	-1.74599	-31.6978	-8.3748	-14.3386	-6.8839	0.903634	-121695	-297833	-460312	-654471	-415650	13381
200.3	0.156503	-2.38972	-31.3106	-8.98381	-15.1492	-7.89708	-0.447475	-166564	-294194	-493786	-691470	-476826	-6626.21
200.4	0.357572	-3.30373	-32.4144	-9.62839	-16.1684	-8.4912	-1.55722	-230270	-304565	-529215	-737989	-512699	-23059.3
200.5	0.19789	-4.08742	-32.9698	-9.62622	-16.355	-8.91458	-2.41693	-284893	-309784	-529096	-746507	-538262	-35789.9
200.6	0.331853	-4.85904	-32.3884	-9.90112	-17.3935	-10.0529	-3.62559	-338675	-304321	-544205	-793907	-606995	-53687.8
200.7	0.386231	-5.17365	-32.3772	-10.2414	-17.636	-10.7097	-3.98615	-360603	-304216	-562907	-804979	-646654	-59026.9
200.8	0.302488	-5.35644	-31.708	-10.5918	-17.6198	-11.7797	-5.33512	-373344	-297928	-582167	-804238	-711258	-79002.4
200.9	0.378495	-5.49995	-31.2995	-10.7845	-17.804	-12.4823	-6.20211	-383346	-294090	-592759	-812646	-753681	-91840.8
201	0.327325	-6.08192	-31.108	-11.2382	-18.2269	-12.9782	-6.90001	-423909	-292291	-617698	-831950	-783625	-102175
201.1	0.272863	-6.68415	-30.4857	-11.6578	-18.6445	-13.8243	-7.86938	-465885	-286443	-640757	-851008	-834709	-116530
201.2	0.039739	-7.20077	-29.9678	-12.0086	-18.8605	-14.1564	-8.77009	-501894	-281578	-660043	-860870	-854766	-129867
201.3	0.152556	-7.32089	-29.5655	-12.6019	-19.304	-14.6621	-10.0545	-510266	-277797	-692648	-881110	-885295	-148887
201.4	0.0860972	-7.76883	-29.7982	-12.8258	-19.552	-15.4617	-11.0507	-541487	-279984	-704957	-892431	-933577	-163639
201.5	0.140773	-8.28923	-29.8745	-13.0742	-20.1408	-16.3231	-12.147	-577760	-280701	-718609	-919305	-985587	-179872
201.6	0.208755	-8.73328	-30.3299	-13.4713	-20.3174	-16.5102	-12.7188	-608709	-284979	-740434	-927365	-996883	-188339
201.7	0.065531	-9.31459	-30.0086	-13.8702	-20.5047	-17.0162	-13.7321	-649227	-281961	-762363	-935918	-1.02744e+06	-203345
201.8	0.0651942	-9.6885	-30.1662	-14.2173	-20.8697	-17.5724	-14.8127	-675289	-283442	-781439	-952576	-1.06102e+06	-219346
201.9	0.145038	-10.0924	-30.4243	-14.6754	-20.9537	-18.3427	-15.9101	-703438	-285867	-806621	-956412	-1.10753e+06	-235597
202	0.181324	-10.3219	-30.7662	-15.0515	-21.2442	-18.8652	-16.6692	-719438	-289079	-827292	-969671	-1.13908e+06	-246838
202.1	0.133794	-10.5358	-30.2585	-15.3164	-21.5462	-19.3122	-17.427	-734345	-284309	-841850	-983454	-1.16607e+06	-258059
202.2	0.0812881	-10.655	-30.1265	-15.2023	-22.2644	-19.8784	-18.0544	-742653	-283068	-835579	-1.01624e+06	-1.20026e+06	-267349
202.3	0.0114868	-11.0509	-29.9385	-15.7026	-22.3871	-20.3129	-18.7427	-770247	-281302	-863077	-1.02184e+06	-1.22649e+06	-277542
202.4	0.0562858	-11.545	-29.8717	-16.4405	-22.9415	-21.0852	-19.4673	-804686	-280674	-903635	-1.04714e+06	-1.27312e+06	-288272
202.5	0.153818	-12.0778	-29.9621	-16.8808	-23.4205	-22.0277	-20.1948	-841824	-281524	-927837	-1.06901e+06	-1.33003e+06	-299045
202.6	0.296895	-12.2977	-29.5801	-17.099	-23.646	-22.6625	-20.9051	-857149	-277935	-939829	-1.0793e+06	-1.36836e+06	-309563
202.7	0.264564	-12.7133	-29.8656	-16.9512	-23.6857	-23.1903	-21.6414	-886115	-280617	-931704	-1.08111e+06	-1.40023e+06	-320465
202.8	0.367145	-12.9764	-29.6517	-17.2753	-23.9401	-23.9904	-22.5297	-904458	-278608	-949522	-1.09272e+06	-1.44854e+06	-333620
202.9	0.42365	-13.6826	-29.7669	-17.6115	-24.2132	-24.9415	-23.0293	-953674	-279690	-968001	-1.10519e+06	-1.50597e+06	-341019
203	0.465918	-14.2236	-29.5423	-18.049	-23.94	-25.3434	-23.6782	-991386	-277580	-992046	-1.09272e+06	-1.53024e+06	-350627
203.1	0.453486	-14.5556	-29.0892	-18.197	-24.072	-25.3935	-24.7405	-1.01452e+06	-273322	-1.00018e+06	-1.09874e+06	-1.53326e+06	-366357
203.2	0.395	-15.0137	-28.7121	-18.2051	-23.797	-25.6648	-25.6053	-1.04645e+06	-269779	-1.00063e+06	-1.08619e+06	-1.54964e+06	-379163
203.3	0.235479	-15.004	-28.5372	-18.163	-23.7046	-25.6907	-26.2326	-1.04578e+06	-268135	-998310	-1.08197e+06	-1.5512e+06	-388452
203.4	0.215095	-15.2105	-28.8469	-18.234	-24.047	-26.0257	-26.8446	-1.06017e+06	-271045	-1.00221e+06	-1.0976e+06	-1.57143e+06	-397515
203.5	0.197286	-15.643	-28.6371	-18.7028	-24.3116	-26.3703	-27.5359	-1.09032e+06	-269074	-1.02798e+06	-1.10968e+06	-1.59224e+06	-407751
203.6	0.175265	-15.8886	-28.7713	-18.7862	-24.8125	-26.8171	-28.0527	-1.10743e+06	-270335	-1.03256e+06	-1.13254e+06	-1.61921e+06	-415404
203.7	0.0384468	-15.8198	-28.3515	-19.0465	-24.7372	-26.8428	-28.7806	-1.10264e+06	-266391	-1.04687e+06	-1.12911e+06	-1.62077e+06	-426184
203.8	0.198502	-16.1786	-28.3132	-19.3331	-25.2328	-27.5665	-30.0979	-1.12765e+06	-266031	-1.06262e+06	-1.15173e+06	-1.66447e+06	-445690
203.9	0.21534	-16.3887	-28.1523	-19.5344	-25.4617	-27.9481	-30.5657	-1.1423e+06	-264519	-1.07369e+06	-1.16218e+06	-1.68751e+06	-452617
204	0.233827	-16.6133	-28.2187	-19.6863	-25.9466	-28.6624	-30.9825	-1.15795e+06	-265143	-1.08204e+06	-1.18431e+06	-1.73064e+06	-458789
204.1	0.355013	-17.0001	-27.6404	-19.9249	-26.4184	-29.277	-31.617	-1.18491e+06	-259709	-1.09515e+06	-1.20584e+06	-1.76775e+06	-468185
204.2	0.386935	-17.5655	-27.2794	-20.4127	-26.5021	-29.6306	-32.4135	-1.22432e+06	-256318	-1.12197e+06	-1.20966e+06	-1.7891e+06	-479980
204.3	0.394903	-17.7012	-27.1221	-20.5449	-26.5619	-29.6068	-33.0381	-1.23377e+06	-254839	-1.12923e+06	-1.21239e+06	-1.78766e+06	-489228
204.4	0.323762	-17.9859	-26.4192	-20.8732	-26.7074	-29.7839	-33.5504	-1.25361e+06	-248234	-1.14727e+06	-1.21903e+06	-1.79835e+06	-496814
204.5	0.322934	-18.4897	-26.3492	-20.9589	-26.6841	-30.2848	-34.038	-1.28873e+06	-247577	-1.15199e+06	-1.21797e+06	-1.8286e+06	-504035
204.6	0.252566	-18.8389	-26.0329	-21.0709	-26.9333	-30.6846	-34.4252	-1.31307e+06	-244605	-1.15814e+06	-1.22934e+06	-1.85273e+06	-509768
204.7	0.151625	-18.9398	-25.9167	-21.0172	-26.8095	-30.8983	-34.969	-1.32011e+06	-243514	-1.15519e+06	-1.22369e+06	-1.86564e+06	-517821
204.8	0.0398267	-19.1248	-25.5542	-20.8845	-26.6044	-31.0571	-35.5367	-1.333e+06	-240108	-1.1479e+06	-1.21433e+06	-1.87523e+06	-526228
204.9	0.0496692	-19.2548	-25.6707	-20.9952	-26.554	-31.3838	-36.1046	-1.34206e+06	-241202	-1.15398e+06	-1.21203e+06	-1.89495e+06	-534636
205	0.00635863	-19.3574	-25.3764	-21.1723	-26.4707	-31.5824	-36.3946	-1.34921e+06	-238436	-1.16371e+06	-1.20823e+06	-1.90694e+06	-538931
205.1	-0.0221761	-19.3575	-25.3518	-21.1496	-26.5132	-31.9325	-36.7868	-1.34922e+06	-238206	-1.16247e+06	-1.21017e+06	-1.92809e+06	-544739
205.2	-0.140734	-19.4378	-25.134	-21.146	-26.3782	-31.863	-37.2865	-1.35481e+06	-236159	-1.16227e+06	-1.20401e+06	-1.92389e+06	-552138
205.3	-0.146312	-19.4754	-24.9168	-20.9852	-26.4555	-32.1232	-37.7083	-1.35743e+06	-234118	-1.15343e+06	-1.20753e+06	-1.9396e+06	-558384
205.4	-0.17784	-19.2722	-25.0551	-21.1045	-26.3339	-32.0464	-37.8982	-1.34327e+06	-235417	-1.15999e+06	-1.20198e+06	-1.93496e+06	-561196
205.5	-0.161415	-19.3783	-25.1315	-21.323	-26.3787	-32.3328	-38.4503	-1.35067e+06	-236135	-1.172e+06	-1.20403e+06	-1.95225e+06	-569372
205.6	-0.0175642	-19.6629	-25.1182	-21.6848	-26.825	-32.9755	-39.1472	-1.37051e+06	-236011	-1.19189e+06	-1.2244e+06	-1.99106e+06	-579692
205.7	0.0302845	-20.0012	-25.2168	-21.9973	-26.5772	-33.1698	-39.3271	-1.39408e+06	-236937	-1.20906e+06	-1.21309e+06	-2.00279e+06	-582355
205.8	-0.112374	-20.1112	-24.8379	-21.9443	-26.6542	-33.2113	-39.535	-1.40175e+06	-233377	-1.20615e+06	-1.21661e+06	-2.0053e+06	-585435
205.9	-0.112603	-20.3314	-24.5396	-22.0661	-26.9076	-33.4244	-40.0721	-1.4171e+06	-230574	-1.21284e+06	-1.22817e+06	-2.01817e+06	-593388
206	0.00207437	-20.7961	-24.2736	-22.2361	-26.9603	-34.046	-40.5796	-1.44949e+06	-228075	-1.22218e+06	-1.23057e+06	-2.0557e+06	-600902
206.1	0.0239566	-20.9454	-24.5475	-22.3087	-26.8513	-34.2658	-40.6993	-1.45989e+06	-230648	-1.22617e+06	-1.2256e+06	-2.06897e+06	-602675
206.2	-0.0224381	-21.3759	-23.8898	-22.3642	-26.7235	-34.3514	-40.9581	-1.4899e+06	-224468	-1.22922e+06	-1.21977e+06	-2.07414e+06	-606507
206.3	-0.148144	-21.4755	-23.3779	-22.2024	-26.5746	-34.5024	-40.6841	-1.49684e+06	-219658	-1.22033e+06	-1.21297e+06	-2.08325e+06	-602450
206.4	-0.14823	-21.4846	-22.8688	-22.0797	-26.565	-34.5449	-40.8496	-1.49747e+06	-214875	-1.21359e+06	-1.21253e+06	-2.08582e+06	-604900
206.5	-0.167282	-21.576	-22.6132	-22.0752	-26.7191	-34.6656	-41.1233	-1.50385e+06	-212474	-1.21334e+06	-1.21957e+06	-2.09311e+06	-608954
206.6	-0.0748519	-21.7623	-22.6161	-22.1664	-26.6569	-34.9851	-41.5801	-1.51684e+06	-212501	-1.21836e+06	-1.21673e+06	-2.1124e+06	-615719
206.7	-0.0414449	-21.875	-22.2725	-22.0557	-26.7475	-35.0902	-41.6245	-1.52468e+06	-209272	-1.21227e+06	-1.22086e+06	-2.11874e+06	-616375
206.8	-0.172896	-21.703	-21.8036	-21.8622	-26.4325	-34.9047	-41.4655	-1.5127e+06	-204867	-1.20163e+06	-1.20649e+06	-2.10755e+06	-614021
206.9	-0.178487	-21.6633	-21.5136	-21.8625	-26.3526	-34.8237	-41.7199	-1.50993e+06	-202142	-1.20165e+06	-1.20284e+06	-2.10266e+06	-617788
207	-0.119611	-21.618	-21.2297	-22.0169	-26.4657	-34.7844	-41.9594	-1.50677e+06	-199474	-1.21014e+06	-1.208e+06	-2.10028e+06	-621335
207.1	-0.0733096	-21.7003	-21.2886	-22.0011	-26.0859	-34.7068	-42.343	-1.51251e+06	-200028	-1.20927e+06	-1.19066e+06	-2.0956e+06	-627015
207.2	-0.0379072	-21.7787	-21.2406	-22.0421	-25.794	-34.7309	-42.6925	-1.51797e+06	-199577	-1.21152e+06	-1.17734e+06	-2.09705e+06	-632190
207.3	-0.221771	-21.7646	-20.8214	-21.782	-25.3929	-34.5455	-42.5997	-1.51699e+06	-195638	-1.19723e+06	-1.15903e+06	-2.08586e+06	-630817
207.4	-0.262751	-21.7766	-20.4493	-21.8065	-25.0672	-34.4168	-42.8569	-1.51783e+06	-192142	-1.19858e+06	-1.14417e+06	-2.07809e+06	-634626
207.5	-0.286363	-21.7614	-20.2173	-21.9155	-24.9806	-34.3246	-42.9788	-1.51677e+06	-189962	-1.20457e+06	-1.14022e+06	-2.07252e+06	-636431
207.6	-0.368288	-21.6576	-19.8251	-21.8523	-24.9151	-34.2248	-42.8954	-1.50954e+06	-186277	-1.20109e+06	-1.13723e+06	-2.06649e+06	-635195
207.7	-0.411721	-21.8236	-19.4975	-21.8652	-24.9599	-34.036	-42.8423	-1.5211e+06	-183198	-1.2018e+06	-1.13927e+06	-2.05509e+06	-634408
207.8	-0.365949	-21.942	-19.3907	-21.6201	-25.0634	-34.1274	-42.8842	-1.52935e+06	-182195	-1.18832e+06	-1.14399e+06	-2.06061e+06	-635029
207.9	-0.295982	-21.97	-19.414	-21.6418	-25.1641	-34.0353	-42.977	-1.53131e+06	-182414	-1.18952e+06	-1.14859e+06	-2.05505e+06	-636404
208	-0.278147	-21.8654	-19.2701	-21.741	-25.1699	-33.8701	-42.8627	-1.52402e+06	-181061	-1.19497e+06	-1.14885e+06	-2.04507e+06	-634710
208.1	-0.187119	-21.6753	-19.1075	-21.8161	-25.1187	-33.8041	-42.8465	-1.51077e+06	-179534	-1.1991e+06	-1.14652e+06	-2.04109e+06	-634471
208.2	-0.150805	-21.4043	-18.8852	-21.5677	-24.887	-33.7604	-42.7444	-1.49188e+06	-177445	-1.18545e+06	-1.13594e+06	-2.03845e+06	-632959
208.3	-0.0223858	-21.4008	-18.8612	-21.5622	-24.5691	-33.8887	-42.8569	-1.49164e+06	-177220	-1.18515e+06	-1.12143e+06	-2.0462e+06	-634625
208.4	0.0336829	-21.3487	-18.7773	-21.506	-24.3167	-33.7547	-42.8085	-1.488e+06	-176431	-1.18205e+06	-1.10991e+06	-2.03811e+06	-633908
208.5	-0.058206	-21.2821	-18.489	-21.1719	-23.9077	-33.4648	-42.532	-1.48336e+06	-173723	-1.16369e+06	-1.09124e+06	-2.0206e+06	-629814
208.6	-0.116297	-21.0955	-18.4652	-21.0953	-23.6351	-33.2456	-42.3181	-1.47036e+06	-173499	-1.15948e+06	-1.0788e+06	-2.00737e+06	-626646
208.7	-0.16416	-20.875	-18.2093	-20.9788	-23.4556	-33.0463	-41.8549	-1.45499e+06	-171095	-1.15308e+06	-1.07061e+06	-1.99534e+06	-619788
208.8	-0.131598	-20.8942	-18.1318	-20.7916	-23.3284	-33.0465	-41.7858	-1.45633e+06	-170366	-1.14279e+06	-1.0648e+06	-1.99535e+06	-618764
208.9	-0.21813	-20.8106	-17.8026	-20.386	-23.1405	-32.8464	-41.4982	-1.4505e+06	-167273	-1.12049e+06	-1.05622e+06	-1.98326e+06	-614505
209	-0.253928	-20.813	-17.6088	-20.2744	-23.003	-32.6245	-41.4084	-1.45066e+06	-165452	-1.11436e+06	-1.04995e+06	-1.96987e+06	-613175
209.1	-0.266575	-20.7452	-17.5317	-20.1434	-22.9523	-32.2686	-41.4081	-1.44594e+06	-164728	-1.10716e+06	-1.04764e+06	-1.94838e+06	-613172
209.2	-0.386154	-20.6709	-17.407	-19.9367	-22.6698	-31.9358	-41.1481	-1.44076e+06	-163557	-1.0958e+06	-1.03474e+06	-1.92829e+06	-609322
209.3	-0.381326	-20.4186	-17.1701	-20.0128	-22.7147	-31.8476	-41.1537	-1.42317e+06	-161330	-1.09998e+06	-1.03679e+06	-1.92296e+06	-609404
209.4	-0.330155	-20.4442	-17.214	-20.0653	-22.6253	-31.8434	-41.1198	-1.42496e+06	-161743	-1.10287e+06	-1.03271e+06	-1.92271e+06	-608903
209.5	-0.339783	-20.5342	-16.8055	-19.9704	-22.2978	-31.7317	-40.7773	-1.43123e+06	-157905	-1.09765e+06	-1.01776e+06	-1.91596e+06	-603831
209.6	-0.329787	-20.1849	-16.7025	-19.8224	-22.3414	-31.2813	-40.8404	-1.40689e+06	-156937	-1.08952e+06	-1.01975e+06	-1.88877e+06	-604765
209.7	-0.170681	-20.1735	-16.8692	-19.8915	-22.4396	-31.2157	-40.7762	-1.40609e+06	-158503	-1.09332e+06	-1.02423e+06	-1.88481e+06	-603814
209.8	-0.119056	-20.1502	-16.9806	-19.8042	-22.3653	-31.2322	-40.6921	-1.40447e+06	-159550	-1.08852e+06	-1.02084e+06	-1.8858e+06	-602569
209.9	-0.202396	-20.1511	-17.0493	-19.6754	-22.1577	-30.987	-40.1201	-1.40453e+06	-160195	-1.08144e+06	-1.01137e+06	-1.871e+06	-594099
210	-0.251366	-19.9065	-16.7876	-19.4296	-21.8506	-30.7937	-39.9277	-1.38749e+06	-157737	-1.06793e+06	-997350	-1.85933e+06	-591250
210.1	-0.342065	-19.7108	-16.6788	-19.0123	-21.5742	-30.5123	-39.7743	-1.37385e+06	-156714	-1.04499e+06	-984734	-1.84233e+06	-588978
210.2	-0.235616	-19.6898	-16.5667	-19.0756	-21.4649	-30.4123	-39.5507	-1.37238e+06	-155661	-1.04847e+06	-979743	-1.83629e+06	-585667
210.3	-0.331102	-19.3977	-16.3593	-18.7851	-21.2049	-30.1412	-39.3229	-1.35202e+06	-153712	-1.0325e+06	-967876	-1.81993e+06	-582293
210.4	-0.440729	-19.1885	-16.0221	-18.5174	-20.9123	-30.0134	-38.9567	-1.33744e+06	-150543	-1.01779e+06	-954520	-1.81221e+06	-576870
210.5	-0.563324	-19.0682	-15.5749	-18.3599	-20.5254	-29.5745	-38.567	-1.32905e+06	-146342	-1.00913e+06	-936860	-1.78571e+06	-571100
210.6	-0.651058	-18.8685	-15.2429	-18.2068	-20.4423	-29.3308	-38.387	-1.31514e+06	-143223	-1.00072e+06	-933070	-1.771e+06	-568435
210.7	-0.674435	-18.7776	-14.8669	-18.0357	-20.3595	-28.9498	-38.1612	-1.3088e+06	-139689	-991312	-929287	-1.74799e+06	-565091
210.8	-0.649539	-18.6696	-14.6111	-17.9739	-20.2517	-28.9462	-38.0528	-1.30127e+06	-137286	-987915	-924367	-1.74777e+06	-563485
210.9	-0.68843	-18.6108	-14.5111	-17.8877	-20.3304	-28.7223	-37.9181	-1.29717e+06	-136346	-983178	-927959	-1.73425e+06	-561491
211	-0.722295	-18.4336	-14.2498	-17.6777	-20.1952	-28.5657	-37.7059	-1.28482e+06	-133891	-971637	-921790	-1.7248e+06	-558349
211.1	-0.657363	-18.4096	-14.2507	-17.6791	-20.1895	-28.4187	-37.6524	-1.28315e+06	-133900	-971716	-921531	-1.71592e+06	-557557
211.2	-0.696578	-18.3214	-14.0829	-17.6523	-19.8791	-28.2477	-37.514	-1.277e+06	-132323	-970242	-907363	-1.7056e+06	-555508
211.3	-0.699007	-18.2301	-13.8177	-17.6365	-19.964	-28.1133	-37.5015	-1.27064e+06	-129831	-969372	-911236	-1.69748e+06	-555322
211.4	-0.733721	-18.259	-13.6993	-17.5881	-19.7157	-28.1212	-37.157	-1.27265e+06	-128718	-966711	-899902	-1.69796e+06	-550221
211.5	-0.857274	-18.115	-13.3096	-17.3561	-19.4413	-27.9659	-36.9665	-1.26262e+06	-125057	-953962	-887380	-1.68858e+06	-547400
211.6	-0.864667	-18.0651	-13.3189	-17.1351	-19.3725	-27.8179	-36.7848	-1.25914e+06	-125145	-941815	-884240	-1.67965e+06	-544710
211.7	-0.871607	-17.8534	-13.3498	-17.1684	-19.1613	-27.7664	-36.8209	-1.24438e+06	-125435	-943644	-874598	-1.67653e+06	-545244
211.8	-0.84342	-17.7839	-13.2308	-17.1122	-19.0072	-27.7115	-36.6919	-1.23954e+06	-124316	-940554	-867564	-1.67322e+06	-543333
211.9	-0.893629	-17.736	-13.122	-17.1359	-18.8244	-27.5949	-36.6251	-1.2362e+06	-123294	-941856	-859220	-1.66618e+06	-542344
212	-0.959043	-17.6388	-12.8992	-16.9779	-18.755	-27.4236	-36.4425	-1.22942e+06	-121200	-933171	-856051	-1.65583e+06	-539640
212.1	-0.969959	-17.7043	-12.9534	-16.8108	-18.6593	-27.2302	-36.2479	-1.23399e+06	-121711	-923991	-851687	-1.64416e+06	-536760
212.2	-1.02284	-17.6692	-12.839	-16.5869	-18.3267	-27.0224	-36.0373	-1.23154e+06	-120635	-911680	-836502	-1.63161e+06	-533640
212.3	-0.949029	-17.6113	-12.9743	-16.6604	-18.459	-26.8212	-36.1793	-1.22751e+06	-121906	-915721	-842541	-1.61946e+06	-535743
212.4	-0.79523	-17.761	-13.076	-16.7026	-18.4232	-26.8354	-36.2321	-1.23794e+06	-122862	-918040	-840907	-1.62032e+06	-536524
212.5	-0.854857	-17.6599	-12.9142	-16.6429	-18.4006	-26.6022	-36.0135	-1.2309e+06	-121342	-914763	-839879	-1.60624e+06	-533289
212.6	-0.8182	-17.7542	-12.8244	-16.6148	-18.3	-26.4766	-35.837	-1.23747e+06	-120498	-913216	-835285	-1.59866e+06	-530674
212.7	-0.847248	-17.8062	-12.8219	-16.3634	-18.2543	-26.3162	-35.7875	-1.24109e+06	-120474	-899395	-833197	-1.58897e+06	-529941
212.8	-0.738433	-17.8609	-12.8772	-16.361	-18.0979	-26.3561	-35.7963	-1.2449e+06	-120994	-899264	-826059	-1.59138e+06	-530071
212.9	-0.687909	-17.7925	-12.9673	-16.4031	-18.0111	-26.3723	-35.8934	-1.24014e+06	-121841	-901579	-822098	-1.59236e+06	-531509
213	-0.647112	-17.8411	-12.8564	-16.2166	-18.0776	-26.4345	-35.8416	-1.24352e+06	-120799	-891329	-825133	-1.59611e+06	-530742
213.1	-0.622167	-17.884	-12.9062	-16.061	-17.9789	-26.3921	-35.8779	-1.24652e+06	-121267	-882779	-820630	-1.59356e+06	-531280
213.2	-0.605872	-17.8635	-12.8177	-16.0572	-17.8539	-26.4989	-35.9536	-1.24509e+06	-120435	-882569	-814925	-1.60001e+06	-532401
213.3	-0.534614	-17.9055	-12.7856	-16.0794	-17.9008	-26.4862	-35.9239	-1.24801e+06	-120133	-883787	-817063	-1.59924e+06	-531961
213.4	-0.517802	-17.9003	-12.6752	-16.0201	-17.9479	-26.3453	-35.8267	-1.24765e+06	-119096	-880529	-819214	-1.59073e+06	-530522
213.5	-0.470089	-17.7623	-12.5587	-16.0898	-17.9538	-26.4193	-35.8619	-1.23803e+06	-118002	-884360	-819484	-1.5952e+06	-531043
213.6	-0.444958	-17.6065	-12.755	-16.2136	-18.0608	-26.394	-35.8388	-1.22718e+06	-119846	-891167	-824369	-1.59367e+06	-530702
213.7	-0.48903	-17.5864	-12.4289	-16.0564	-18.0491	-26.4189	-35.6997	-1.22577e+06	-116782	-882522	-823832	-1.59517e+06	-528641
213.8	-0.549943	-17.3601	-12.2693	-16.1062	-17.8646	-26.1661	-35.6728	-1.21e+06	-115282	-885259	-815410	-1.57991e+06	-528242
213.9	-0.616755	-17.2385	-12.1146	-16.035	-17.7363	-26.081	-35.4525	-1.20153e+06	-113829	-881350	-809558	-1.57477e+06	-524981
214	-0.547032	-17.3046	-12.0647	-16.2157	-17.9279	-26.2101	-35.3845	-1.20613e+06	-113360	-891278	-818300	-1.58256e+06	-523973
214.1	-0.522737	-17.3624	-12.0242	-16.3312	-17.9765	-26.2663	-35.4104	-1.21016e+06	-112979	-897626	-820518	-1.58596e+06	-524357
214.2	-0.69018	-17.1697	-11.8833	-16.1271	-17.7755	-26.0573	-35.3904	-1.19673e+06	-111656	-886411	-811346	-1.57334e+06	-524061
214.3	-0.688054	-17.1784	-11.8182	-16.0919	-17.6311	-26.2254	-35.2995	-1.19734e+06	-111044	-884478	-804756	-1.58349e+06	-522716
214.4	-0.818405	-16.9952	-11.5469	-15.837	-17.3914	-26.0488	-35.1655	-1.18457e+06	-108495	-870465	-793813	-1.57283e+06	-520731
214.5	-0.869046	-17.0419	-11.3057	-15.7566	-17.3532	-25.9197	-35.1201	-1.18782e+06	-106228	-866043	-792067	-1.56503e+06	-520058
214.6	-0.835824	-17.1294	-11.4202	-15.887	-17.3583	-26.0214	-35.1481	-1.19392e+06	-107304	-873212	-792301	-1.57117e+06	-520473
214.7	-0.820471	-17.1648	-11.3777	-15.9157	-17.4326	-26.0036	-35.14	-1.19639e+06	-106905	-874792	-795695	-1.5701e+06	-520354
214.8	-0.82697	-17.1537	-11.2363	-15.9065	-17.4631	-26.1366	-35.1062	-1.19561e+06	-105577	-874287	-797087	-1.57813e+06	-519853
214.9	-0.94647	-16.9993	-11.1495	-15.6815	-17.297	-25.8481	-35.1062	-1.18485e+06	-104761	-861920	-789506	-1.56071e+06	-519853
215	-1.09562	-16.7037	-10.8341	-15.3199	-17.069	-25.7247	-34.8668	-1.16425e+06	-101797	-842042	-779097	-1.55326e+06	-516307
215.1	-0.946147	-16.8969	-11.0407	-15.5656	-17.2297	-25.8963	-35.1735	-1.17771e+06	-103738	-855545	-786430	-1.56362e+06	-520848
215.2	-0.976976	-16.9374	-10.9722	-15.6199	-17.4339	-25.8697	-35.0307	-1.18054e+06	-103095	-858534	-795754	-1.56201e+06	-518735
215.3	-0.854557	-17.1752	-11.1787	-15.8182	-17.677	-25.9887	-35.1013	-1.19711e+06	-105035	-869434	-806851	-1.5692e+06	-519781
215.4	-0.881714	-17.3352	-11.1541	-15.8271	-17.5594	-25.9019	-35.061	-1.20826e+06	-104804	-869920	-801481	-1.56396e+06	-519183
215.5	-0.853567	-17.4432	-11.1334	-15.8139	-17.7718	-26.0448	-35.0651	-1.21579e+06	-104610	-869197	-811178	-1.57259e+06	-519244
215.6	-0.92228	-17.443	-11.1069	-15.626	-17.7543	-25.9864	-35.0555	-1.21578e+06	-104361	-858869	-810378	-1.56906e+06	-519102
215.7	-0.830159	-17.6127	-11.2963	-15.8865	-17.7473	-26.07	-35.3358	-1.22761e+06	-106140	-873188	-810060	-1.57411e+06	-523253
215.8	-0.807056	-17.7383	-11.3946	-16.0206	-17.6504	-26.0241	-35.3688	-1.23636e+06	-107064	-880559	-805637	-1.57134e+06	-523742
215.9	-0.830394	-17.7915	-11.1775	-15.8543	-17.5835	-26.0462	-35.4027	-1.24007e+06	-105024	-871416	-802582	-1.57267e+06	-524243
216	-0.836986	-17.8168	-11.0454	-15.8518	-17.5253	-26.0269	-35.347	-1.24183e+06	-103783	-871279	-799925	-1.57151e+06	-523419
216.1	-0.87708	-17.7131	-10.9853	-15.8561	-17.3241	-25.974	-35.3492	-1.2346e+06	-103218	-871516	-790742	-1.56831e+06	-523451
216.2	-0.820574	-17.7855	-10.9644	-15.9216	-17.3097	-25.9602	-35.5409	-1.23965e+06	-103022	-875116	-790085	-1.56748e+06	-526290
216.3	-0.770435	-17.763	-10.9329	-16.0109	-17.4001	-26.0133	-35.7084	-1.23808e+06	-102725	-880021	-794209	-1.57068e+06	-528769
216.4	-0.768011	-17.7256	-10.9201	-16.1198	-17.3536	-25.9197	-35.6634	-1.23547e+06	-102605	-886008	-792087	-1.56503e+06	-528103
216.5	-0.704359	-17.7109	-10.9207	-16.2272	-17.4255	-26.0213	-35.7099	-1.23445e+06	-102611	-891914	-795371	-1.57117e+06	-528793
216.6	-0.57493	-17.8578	-11.1444	-16.4077	-17.6126	-26.0849	-35.8565	-1.24469e+06	-104713	-901831	-803908	-1.575e+06	-530963
216.7	-0.696484	-17.7585	-10.9571	-16.3234	-17.5593	-25.9978	-35.7855	-1.23777e+06	-102953	-897200	-801477	-1.56975e+06	-529912
216.8	-0.714779	-17.7181	-10.9218	-16.5149	-17.4041	-26.1302	-35.7779	-1.23495e+06	-102621	-907726	-794394	-1.57774e+06	-529799
216.9	-0.709181	-17.6517	-10.9749	-16.4856	-17.4363	-26.0775	-35.8645	-1.23032e+06	-103120	-906116	-795863	-1.57456e+06	-531082
217	-0.811386	-17.5807	-10.9509	-16.3867	-17.4139	-26.117	-35.7186	-1.22538e+06	-102895	-900679	-794841	-1.57695e+06	-528921
217.1	-0.804896	-17.5683	-10.9392	-16.3652	-17.3639	-26.1715	-35.6586	-1.22451e+06	-102785	-899497	-792558	-1.58024e+06	-528033
217.2	-0.867958	-17.4888	-10.8301	-16.2631	-17.2444	-26.2389	-35.5798	-1.21897e+06	-101760	-893887	-787105	-1.58431e+06	-526866
217.3	-0.846238	-17.5405	-10.8227	-16.3995	-17.0855	-26.2542	-35.5983	-1.22257e+06	-101690	-901380	-779849	-1.58523e+06	-527139
217.4	-0.879356	-17.5245	-10.6564	-16.3409	-16.9704	-26.1462	-35.5674	-1.22146e+06	-100128	-898164	-774599	-1.57871e+06	-526683
217.5	-0.888551	-17.4997	-10.5597	-16.2759	-16.9964	-26.1663	-35.5768	-1.21973e+06	-99219.4	-894591	-775786	-1.57992e+06	-526822
217.6	-0.695662	-17.6896	-10.8364	-16.45	-17.1552	-26.2339	-35.8123	-1.23297e+06	-101819	-904160	-783034	-1.58401e+06	-530309
217.7	-0.609919	-17.864	-10.9958	-16.554	-17.3503	-26.4062	-35.8373	-1.24512e+06	-103316	-909873	-791936	-1.59441e+06	-530678
217.8	-0.611548	-17.8116	-10.9544	-16.5476	-17.2974	-26.4959	-36.0023	-1.24147e+06	-102927	-909520	-789520	-1.59982e+06	-533121
217.9	-0.603931	-17.7567	-10.9376	-16.5745	-17.3432	-26.5788	-35.9718	-1.23764e+06	-102769	-910999	-791612	-1.60483e+06	-532670
218	-0.661402	-17.7992	-10.7727	-16.5689	-17.4103	-26.4983	-36.0656	-1.2406e+06	-101220	-910693	-794676	-1.59997e+06	-534059
218.1	-0.642495	-17.9013	-10.8021	-16.3742	-17.4224	-26.6475	-36.1375	-1.24772e+06	-101497	-899992	-795228	-1.60898e+06	-535124
218.2	-0.659554	-17.8683	-10.7694	-16.3445	-17.5273	-26.6409	-36.1019	-1.24542e+06	-101190	-898362	-800018	-1.60858e+06	-534598
218.3	-0.585148	-17.9807	-10.9047	-16.3865	-17.5526	-26.8541	-36.1859	-1.25325e+06	-102460	-900665	-801169	-1.62145e+06	-535840
218.4	-0.693102	-17.8835	-10.6731	-16.3139	-17.5114	-26.7548	-36.0166	-1.24648e+06	-100284	-896677	-799290	-1.61545e+06	-533334
218.5	-0.821448	-17.8914	-10.4571	-16.3349	-17.2152	-26.7614	-36.072	-1.24703e+06	-98254.5	-897829	-785768	-1.61585e+06	-534153
218.6	-0.752708	-18.0232	-10.6262	-16.4006	-17.103	-26.7642	-36.0113	-1.25622e+06	-99843.7	-901442	-780649	-1.61602e+06	-533255
218.7	-0.823545	-18.0671	-10.4675	-16.2332	-16.9268	-26.6171	-36.2197	-1.25927e+06	-98352.2	-892239	-772605	-1.60714e+06	-536341
218.8	-0.825115	-18.0288	-10.3792	-16.3597	-16.9341	-26.5479	-36.2489	-1.25661e+06	-97522.8	-899194	-772939	-1.60296e+06	-536773
218.9	-0.845496	-17.9371	-10.4816	-16.4813	-16.905	-26.4695	-36.2391	-1.25022e+06	-98485.2	-905878	-771612	-1.59823e+06	-536629
219	-0.752607	-18.076	-10.5667	-16.647	-17.034	-26.6871	-36.3143	-1.2599e+06	-99284.6	-914985	-777500	-1.61137e+06	-537742
219.1	-0.743128	-18.126	-10.6212	-16.6892	-17.0869	-26.7087	-36.4264	-1.26338e+06	-99796.5	-917304	-779913	-1.61267e+06	-539402
219.2	-0.709755	-18.1863	-10.7749	-16.8064	-17.1114	-26.6351	-36.6371	-1.26759e+06	-101241	-923749	-781035	-1.60823e+06	-542523
219.3	-0.718817	-18.0955	-10.7863	-16.7523	-17.1372	-26.5492	-36.6369	-1.26126e+06	-101348	-920772	-782210	-1.60304e+06	-542519
219.4	-0.87137	-17.8172	-10.6452	-16.6981	-17.1893	-26.4914	-36.5588	-1.24186e+06	-100023	-917796	-784590	-1.59955e+06	-541363
219.5	-0.849406	-17.9447	-10.6954	-16.7344	-17.3313	-26.4089	-36.45	-1.25075e+06	-100494	-919789	-791070	-1.59457e+06	-539752
219.6	-0.82288	-17.9379	-10.7067	-16.8173	-17.3243	-26.4693	-36.3742	-1.25027e+06	-100600	-924347	-790751	-1.59822e+06	-538629
219.7	-0.881484	-17.9443	-10.581	-16.7847	-17.2382	-26.4096	-36.2116	-1.25072e+06	-99419.2	-922555	-786821	-1.59461e+06	-536222
219.8	-0.958142	-17.8573	-10.4094	-16.7688	-17.1061	-26.2808	-36.0952	-1.24465e+06	-97806.3	-921678	-780789	-1.58683e+06	-534497
219.9	-0.948841	-17.8642	-10.3581	-16.787	-17.0384	-26.4446	-36.114	-1.24513e+06	-97324.3	-922678	-777699	-1.59672e+06	-534776
220	-0.984991	-17.9122	-10.2421	-16.8304	-16.9844	-26.4948	-35.9745	-1.24848e+06	-96234.9	-925067	-775236	-1.59976e+06	-532711
220.1	-0.977283	-17.9573	-10.1897	-16.8321	-17.137	-26.5018	-35.8153	-1.25162e+06	-95742.6	-925160	-782202	-1.60018e+06	-530353
220.2	-0.898761	-18.048	-10.1832	-16.8939	-17.1786	-26.4706	-35.8784	-1.25795e+06	-95681.7	-928558	-784102	-1.5983e+06	-531288
220.3	-0.874809	-18.2009	-10.0645	-16.9915	-17.2004	-26.6058	-36.0616	-1.2686e+06	-94566	-933920	-785095	-1.60646e+06	-534000
220.4	-0.812765	-18.2754	-10.2635	-16.9949	-17.2399	-26.6613	-36.2964	-1.2738e+06	-96436.2	-934110	-786900	-1.60981e+06	-537478
220.5	-0.820179	-18.2042	-10.1891	-16.9717	-17.3858	-26.6781	-36.4161	-1.26883e+06	-95737	-932834	-793558	-1.61082e+06	-539250
220.6	-0.843489	-18.0421	-10.2832	-16.9756	-17.3981	-26.67	-36.5618	-1.25754e+06	-96621.1	-933047	-794119	-1.61034e+06	-541407
220.7	-0.862557	-18.0324	-10.2454	-16.9513	-17.3109	-26.5955	-36.6078	-1.25686e+06	-96266.2	-931714	-790141	-1.60584e+06	-542089
220.8	-0.877091	-17.9868	-10.098	-16.8368	-17.3653	-26.6238	-36.7275	-1.25368e+06	-94880.9	-925418	-792622	-1.60755e+06	-543861
220.9	-0.85379	-17.9101	-10.1394	-16.9339	-17.3274	-26.7363	-36.9187	-1.24833e+06	-95269.9	-930755	-790892	-1.61434e+06	-546692
221	-0.976787	-17.7907	-10.0814	-16.7325	-17.3057	-26.4788	-36.9148	-1.24001e+06	-94725	-919686	-789902	-1.59879e+06	-546635
221.1	-1.03271	-17.7553	-10.0257	-16.6746	-17.2753	-26.5327	-36.7666	-1.23754e+06	-94201.4	-916502	-788513	-1.60204e+06	-544440
221.2	-1.07127	-17.6449	-9.99553	-16.6394	-17.232	-26.3427	-36.711	-1.22985e+06	-93918	-914570	-786539	-1.59057e+06	-543617
221.3	-1.05307	-17.6431	-9.89433	-16.6197	-17.228	-26.3088	-36.6199	-1.22973e+06	-92967.1	-913487	-786356	-1.58853e+06	-542268
221.4	-0.987157	-17.7733	-9.91324	-16.7101	-17.2231	-26.4598	-36.7479	-1.2388e+06	-93144.8	-918456	-786133	-1.59765e+06	-544164
221.5	-0.991797	-17.7426	-9.8145	-16.7764	-17.3299	-26.3825	-36.7715	-1.23666e+06	-92217.1	-922098	-791006	-1.59298e+06	-544512
221.6	-0.973983	-17.8463	-9.93222	-16.8555	-17.3045	-26.2545	-36.6974	-1.24389e+06	-93323.1	-926447	-789847	-1.58525e+06	-543415
221.7	-0.98602	-17.8489	-9.92498	-16.8164	-17.2341	-26.0772	-36.5443	-1.24407e+06	-93255.1	-924296	-786632	-1.57454e+06	-541148
221.8	-1.016	-17.7498	-9.8373	-16.8347	-17.0092	-26.1063	-36.2737	-1.23716e+06	-92431.3	-925302	-776368	-1.5763e+06	-537141
221.9	-1.0292	-17.8394	-9.7129	-16.9351	-16.8822	-25.9956	-36.2205	-1.24341e+06	-91262.4	-930821	-770571	-1.56961e+06	-536353
222	-1.06664	-17.7685	-9.66596	-17.0427	-16.8209	-25.946	-36.2717	-1.23846e+06	-90821.4	-936733	-767771	-1.56662e+06	-537111
222.1	-1.08434	-17.6387	-9.67416	-16.9851	-16.7976	-26.0272	-36.1333	-1.22941e+06	-90898.4	-933567	-766708	-1.57152e+06	-535061
222.2	-1.09102	-17.5933	-9.68818	-17.0288	-16.664	-25.9037	-36.0791	-1.22625e+06	-91030.1	-935970	-760611	-1.56406e+06	-534259
222.3	-1.02747	-17.7307	-9.77753	-17.1238	-16.6419	-26.0047	-36.0381	-1.23583e+06	-91869.7	-941194	-759604	-1.57017e+06	-533653
222.4	-1.01755	-17.8016	-9.67085	-17.0967	-16.6872	-26.0358	-35.8907	-1.24078e+06	-90867.3	-939700	-761673	-1.57204e+06	-531469
222.5	-1.02165	-17.7325	-9.58245	-17.1205	-16.7568	-26.0113	-35.7987	-1.23596e+06	-90036.7	-941014	-764845	-1.57056e+06	-530108
222.6	-0.982034	-17.762	-9.60127	-17.0677	-17.0289	-25.9205	-35.7887	-1.23801e+06	-90213.5	-938107	-777266	-1.56508e+06	-529959
222.7	-0.982345	-17.7642	-9.65445	-16.9866	-17.0142	-25.9887	-35.8067	-1.23816e+06	-90713.3	-933649	-776594	-1.56919e+06	-530225
222.8	-1.00881	-17.7527	-9.44829	-17.0726	-16.966	-25.8727	-35.6843	-1.23736e+06	-88776.1	-938378	-774396	-1.56219e+06	-528413
222.9	-0.90079	-17.8905	-9.51941	-17.172	-16.9841	-25.795	-35.7516	-1.24697e+06	-89444.4	-943842	-775223	-1.5575e+06	-529410
223	-0.895321	-17.9031	-9.56178	-17.2465	-16.9809	-25.7183	-35.6432	-1.24784e+06	-89842.5	-947935	-775075	-1.55287e+06	-527804
223.1	-0.985413	-17.8061	-9.45229	-17.1058	-16.8196	-25.6659	-35.5049	-1.24108e+06	-88813.7	-940202	-767713	-1.54971e+06	-525756
223.2	-1.05487	-17.6688	-9.44953	-17.0125	-16.7121	-25.5607	-35.4496	-1.23152e+06	-88787.8	-935077	-762808	-1.54336e+06	-524938
223.3	-0.99289	-17.734	-9.36551	-16.9185	-16.6965	-25.6883	-35.5182	-1.23606e+06	-87998.3	-929909	-762096	-1.55106e+06	-525954
223.4	-1.00663	-17.8269	-9.42327	-16.9994	-16.5544	-25.6599	-35.5141	-1.24253e+06	-88541	-934353	-755608	-1.54934e+06	-525892
223.5	-1.06335	-17.658	-9.35765	-16.9011	-16.4473	-25.5377	-35.3248	-1.23077e+06	-87924.5	-928949	-750718	-1.54197e+06	-523089
223.6	-1.05378	-17.6978	-9.36842	-16.7901	-16.3589	-25.4377	-35.2917	-1.23354e+06	-88025.7	-922852	-746687	-1.53593e+06	-522600
223.7	-1.07944	-17.7403	-9.28996	-16.733	-16.3452	-25.3898	-35.2234	-1.2365e+06	-87288.5	-919710	-746058	-1.53303e+06	-521588
223.8	-1.14085	-17.6288	-9.06555	-16.6159	-16.2731	-25.4258	-35.0934	-1.22873e+06	-85179.9	-913279	-742767	-1.53521e+06	-519662
223.9	-1.17614	-17.5914	-9.02506	-16.5344	-16.2766	-25.1452	-35.0072	-1.22612e+06	-84799.5	-908795	-742927	-1.51826e+06	-518386
224	-1.20027	-17.5028	-9.02533	-16.4947	-16.1405	-24.8846	-34.9345	-1.21995e+06	-84802	-906616	-736718	-1.50253e+06	-517311
224.1	-1.14329	-17.4549	-9.12441	-16.5016	-16.0581	-24.8073	-34.9406	-1.21661e+06	-85733	-906994	-732956	-1.49787e+06	-517401
224.2	-1.10354	-17.4989	-9.01986	-16.5357	-16.0946	-24.7513	-34.9855	-1.21967e+06	-84750.6	-908866	-734620	-1.49448e+06	-518065
224.3	-1.01558	-17.5664	-9.23352	-16.6736	-16.0413	-24.8356	-34.9665	-1.22438e+06	-86758.2	-916449	-732190	-1.49957e+06	-517784
224.4	-1.0074	-17.4561	-9.2227	-16.5856	-15.9761	-24.8202	-34.9221	-1.21669e+06	-86656.5	-911611	-729213	-1.49864e+06	-517126
224.5	-0.950928	-17.4265	-9.38447	-16.504	-15.9267	-24.7723	-34.7819	-1.21463e+06	-88176.5	-907124	-726957	-1.49575e+06	-515050
224.6	-0.863956	-17.4198	-9.43234	-16.5126	-15.9824	-24.6692	-34.7098	-1.21416e+06	-88626.3	-907601	-729503	-1.48953e+06	-513983
224.7	-0.877195	-17.3895	-9.4109	-16.3832	-15.938	-24.6558	-34.4882	-1.21205e+06	-88424.9	-900486	-727474	-1.48872e+06	-510701
224.8	-0.794785	-17.4411	-9.24412	-16.2515	-16.1332	-24.7472	-34.4292	-1.21565e+06	-86857.7	-893248	-736384	-1.49424e+06	-509828
224.9	-0.937998	-17.3474	-9.03079	-16.2072	-16.0906	-24.4915	-34.0731	-1.20911e+06	-84853.3	-890813	-734439	-1.4788e+06	-504554
225	-0.95158	-17.2573	-8.99135	-16.0221	-15.9596	-24.3724	-33.8133	-1.20284e+06	-84482.7	-880640	-728461	-1.47161e+06	-500708
225.1	-0.953717	-17.1312	-8.97175	-15.9444	-15.923	-24.1841	-33.6862	-1.19404e+06	-84298.6	-876367	-726789	-1.46023e+06	-498825
225.2	-0.925013	-17.1425	-8.88171	-15.9206	-15.8977	-24.072	-33.4812	-1.19483e+06	-83452.5	-875059	-725634	-1.45347e+06	-495789
225.3	-0.999374	-16.8967	-8.63206	-15.674	-15.7718	-23.9407	-33.1578	-1.1777e+06	-81106.8	-861507	-719889	-1.44554e+06	-491001
225.4	-1.02231	-16.9171	-8.5881	-15.5686	-15.7375	-23.8261	-32.9915	-1.17912e+06	-80693.8	-855712	-718322	-1.43862e+06	-488538
225.5	-1.02418	-16.8076	-8.60275	-15.4651	-15.6964	-23.8089	-32.9944	-1.17149e+06	-80831.4	-850025	-716447	-1.43758e+06	-488581
225.6	-0.977876	-16.7899	-8.5642	-15.5437	-15.5941	-23.7599	-32.926	-1.17026e+06	-80469.3	-854345	-711778	-1.43462e+06	-487569
225.7	-0.905968	-16.7182	-8.71946	-15.5004	-15.4989	-23.5665	-32.8969	-1.16526e+06	-81928.1	-851966	-707433	-1.42295e+06	-487138
225.8	-0.826945	-16.6518	-8.70514	-15.631	-15.459	-23.5058	-32.8788	-1.16063e+06	-81793.4	-859140	-705609	-1.41928e+06	-486869
225.9	-0.89412	-16.5083	-8.57183	-15.4849	-15.3536	-23.2962	-32.5984	-1.15063e+06	-80540.9	-851111	-700799	-1.40662e+06	-482717
226	-0.869238	-16.4419	-8.5962	-15.4978	-15.1842	-23.1544	-32.3543	-1.146e+06	-80769.9	-851819	-693066	-1.39806e+06	-479102
226.1	-0.799658	-16.5281	-8.70866	-15.4143	-15.1526	-23.089	-32.2025	-1.15201e+06	-81826.6	-847234	-691627	-1.39412e+06	-476855
226.2	-0.764836	-16.3665	-8.63124	-15.4904	-15.0935	-23.0839	-32.1237	-1.14074e+06	-81099.2	-851412	-688926	-1.3938e+06	-475687
226.3	-0.789522	-16.266	-8.62396	-15.3649	-14.9655	-22.8962	-31.9277	-1.13374e+06	-81030.7	-844515	-683084	-1.38247e+06	-472785
226.4	-0.817089	-16.2386	-8.59119	-15.2947	-14.9853	-22.822	-31.7675	-1.13183e+06	-80722.8	-840658	-683990	-1.37799e+06	-470413
226.5	-0.866543	-16.064	-8.4772	-15.2819	-14.8805	-22.6694	-31.431	-1.11966e+06	-79651.7	-839952	-679204	-1.36878e+06	-465430
226.6	-0.883534	-15.9723	-8.53738	-15.1478	-14.784	-22.5771	-31.2744	-1.11327e+06	-80217.2	-832582	-674799	-1.3632e+06	-463111
226.7	-0.791848	-15.9334	-8.5676	-15.1311	-14.7792	-22.6426	-31.2474	-1.11055e+06	-80501.2	-831663	-674580	-1.36716e+06	-462711
226.8	-0.855991	-15.8428	-8.38524	-14.939	-14.5878	-22.428	-31.0376	-1.10424e+06	-78787.7	-821108	-665846	-1.3542e+06	-459605
226.9	-0.886349	-15.646	-8.31352	-14.9436	-14.5136	-22.1464	-30.8449	-1.09052e+06	-78113.8	-821357	-662457	-1.3372e+06	-456751
227	-0.845414	-15.554	-8.34008	-14.7135	-14.3721	-22.012	-30.6874	-1.08411e+06	-78363.4	-808712	-655999	-1.32908e+06	-454419
227.1	-0.902422	-15.4211	-8.1542	-14.6259	-14.2051	-21.7567	-30.3305	-1.07485e+06	-76616.8	-803897	-648377	-1.31367e+06	-449134
227.2	-0.889436	-15.2844	-7.96553	-14.4885	-14.0867	-21.4695	-30.1197	-1.06532e+06	-74844.2	-796344	-642972	-1.29633e+06	-446012
227.3	-0.830792	-15.2132	-8.04425	-14.4387	-13.9623	-21.351	-30.0213	-1.06036e+06	-75583.8	-793609	-637296	-1.28917e+06	-444556
227.4	-0.817172	-15.1715	-8.03633	-14.2712	-13.9893	-21.2463	-29.6768	-1.05746e+06	-75509.3	-784404	-638529	-1.28285e+06	-439454
227.5	-0.888936	-14.9365	-7.7818	-14.0792	-13.9142	-21.0074	-29.3659	-1.04107e+06	-73117.8	-773847	-635098	-1.26842e+06	-434850
227.6	-0.898319	-14.8059	-7.75155	-13.8549	-13.8475	-20.8782	-29.0259	-1.03197e+06	-72833.6	-761520	-632054	-1.26062e+06	-429815
227.7	-0.965637	-14.5712	-7.61399	-13.7831	-13.7279	-20.5967	-28.6719	-1.01561e+06	-71541.1	-757572	-626595	-1.24363e+06	-424573
227.8	-0.997059	-14.4857	-7.5478	-13.7802	-13.6693	-20.363	-28.3484	-1.00966e+06	-70919.1	-757417	-623923	-1.22952e+06	-419784
227.9	-0.973027	-14.3603	-7.59378	-13.7176	-13.5389	-20.1695	-28.1283	-1.00091e+06	-71351.2	-753973	-617968	-1.21783e+06	-416523
228	-0.965138	-14.2561	-7.60959	-13.5993	-13.3729	-20.0445	-27.8775	-993648	-71499.7	-747470	-610391	-1.21028e+06	-412809
228.1	-1.0162	-14.1352	-7.63731	-13.4526	-13.1949	-19.8178	-27.596	-985223	-71760.2	-739409	-602268	-1.1966e+06	-408642
228.2	-1.06682	-14.0118	-7.50713	-13.3768	-12.9807	-19.5111	-27.4147	-976621	-70537	-735241	-592490	-1.17808e+06	-405957
228.3	-1.09204	-13.8734	-7.49365	-13.1732	-12.7481	-19.3914	-27.1704	-966973	-70410.3	-724050	-581872	-1.17085e+06	-402339
228.4	-1.06482	-13.6312	-7.51979	-13.2108	-12.5469	-18.9833	-26.9591	-950093	-70655.9	-726117	-572690	-1.14621e+06	-399210
228.5	-0.997125	-13.5919	-7.48951	-13.081	-12.3973	-18.9644	-26.8573	-947354	-70371.5	-718983	-565861	-1.14507e+06	-397703
228.6	-0.909402	-13.5278	-7.54487	-13.0133	-12.3575	-18.9135	-26.7219	-942888	-70891.6	-715263	-564046	-1.142e+06	-395698
228.7	-0.917661	-13.4001	-7.49007	-12.8087	-12.2651	-18.693	-26.4421	-933990	-70376.7	-704020	-559830	-1.12869e+06	-391555
228.8	-0.987833	-13.201	-7.36257	-12.6914	-12.0571	-18.3544	-26.2065	-920107	-69178.7	-697568	-550333	-1.10824e+06	-388065
228.9	-0.936219	-13.195	-7.25676	-12.5757	-11.9138	-18.3156	-25.9431	-919690	-68184.5	-691210	-543793	-1.10589e+06	-384165
229	-0.904891	-13.0603	-7.28173	-12.4002	-11.8506	-18.1536	-25.7651	-910304	-68419.1	-681565	-540909	-1.09611e+06	-381530
229.1	-0.903409	-13.004	-7.25379	-12.3004	-11.7936	-17.8943	-25.3795	-906378	-68156.6	-676079	-538307	-1.08046e+06	-375820
229.2	-0.852133	-13.0618	-7.28409	-12.121	-11.7089	-17.8854	-25.2258	-910405	-68441.3	-666217	-534440	-1.07992e+06	-373543
229.3	-0.800521	-13.0505	-7.30098	-12.0429	-11.6389	-17.7614	-24.8947	-909618	-68600	-661925	-531245	-1.07243e+06	-368640
229.4	-0.812114	-12.9986	-7.25955	-11.8424	-11.5767	-17.5332	-24.5721	-906001	-68210.7	-650905	-528406	-1.05865e+06	-363863
229.5	-0.878686	-12.807	-7.10211	-11.7476	-11.3585	-17.2788	-24.2481	-892649	-66731.5	-645696	-518448	-1.04329e+06	-359066
229.6	-0.848043	-12.6875	-6.98278	-11.5742	-11.2165	-17.1645	-24.0154	-884316	-65610.2	-636162	-511964	-1.03639e+06	-355619
229.7	-0.831276	-12.5866	-6.94092	-11.5126	-11.19	-16.9331	-23.8432	-877288	-65216.9	-632780	-510757	-1.02242e+06	-353070
229.8	-0.841739	-12.4699	-6.84254	-11.3621	-11.1012	-16.736	-23.6075	-869149	-64292.5	-624504	-506701	-1.01052e+06	-349579
229.9	-0.747464	-12.3893	-6.93517	-11.3934	-10.923	-16.6166	-23.4273	-863537	-65162.8	-626229	-498571	-1.00331e+06	-346912
230	-0.704482	-12.3184	-6.8033	-11.4558	-10.8312	-16.3769	-23.0578	-858594	-63923.8	-629658	-494380	-988838	-341440
230.1	-0.658976	-12.2653	-6.80138	-11.4718	-10.8839	-16.3146	-23.0199	-854893	-63905.8	-630537	-496786	-985077	-340879
230.2	-0.743523	-12.009	-6.72149	-11.3008	-10.7218	-16.0461	-22.7506	-837026	-63155.1	-621136	-489385	-968862	-336891
230.3	-0.630074	-11.9577	-6.81425	-11.2568	-10.7616	-15.9331	-22.6539	-833454	-64026.7	-618720	-491204	-962042	-335459
230.4	-0.637471	-11.8142	-6.74197	-11.161	-10.7309	-15.7204	-22.3566	-823452	-63347.5	-613455	-489803	-949200	-331057
230.5	-0.596	-11.709	-6.75202	-11.1069	-10.6831	-15.6935	-22.1839	-816117	-63442	-610480	-487619	-947574	-328499
230.6	-0.581502	-11.5373	-6.82826	-11.0588	-10.611	-15.5742	-21.9283	-804150	-64158.3	-607836	-484328	-940370	-324714
230.7	-0.583885	-11.4182	-6.65814	-10.9688	-10.4451	-15.4021	-21.6109	-795850	-62559.9	-602890	-476757	-929980	-320014
230.8	-0.582064	-11.1283	-6.72432	-10.8588	-10.4198	-15.2126	-21.4166	-775645	-63181.7	-596845	-475603	-918539	-317138
230.9	-0.754354	-10.7399	-6.48735	-10.5432	-10.2288	-14.9578	-20.8963	-748574	-60955.1	-579499	-466885	-903155	-309433
231	-0.779647	-10.5839	-6.29596	-10.3248	-10.0304	-14.6782	-20.5723	-737695	-59156.9	-567490	-457825	-886267	-304634
231.1	-0.797554	-10.4565	-6.23479	-10.2	-9.87385	-14.4836	-20.1426	-728821	-58582	-560635	-450682	-874523	-298272
231.2	-0.782518	-10.3747	-6.20807	-10.1026	-9.75768	-14.3247	-19.8443	-723115	-58331	-555278	-445380	-864924	-293854
231.3	-0.787704	-10.2904	-6.03242	-9.9602	-9.6382	-14.1496	-19.6158	-717241	-56680.6	-547452	-439926	-854353	-290471
231.4	-0.815163	-10.1743	-5.92045	-9.81904	-9.50854	-13.864	-19.3656	-709151	-55628.5	-539694	-434008	-837111	-286766
231.5	-0.857218	-10.0165	-5.75101	-9.56978	-9.32418	-13.5647	-18.9892	-698149	-54036.5	-525993	-425593	-819035	-281192
231.6	-0.849795	-9.98081	-5.66681	-9.40541	-9.20171	-13.4242	-18.7007	-695662	-53245.4	-516959	-420003	-810553	-276920
231.7	-0.863225	-9.96157	-5.53519	-9.29368	-8.97593	-13.0503	-18.3764	-694322	-52008.7	-510818	-409697	-787976	-272117
231.8	-0.850265	-9.82133	-5.51518	-9.16994	-8.89015	-12.8606	-18.0652	-684547	-51820.6	-504016	-405782	-776525	-267510
231.9	-0.831427	-9.76337	-5.48486	-8.99338	-8.84867	-12.6869	-17.9307	-680507	-51535.8	-494312	-403889	-766033	-265517
232	-0.796191	-9.67981	-5.45773	-8.82191	-8.70165	-12.46	-17.6985	-674683	-51280.8	-484887	-397178	-752335	-262080
232.1	-0.818289	-9.52231	-5.36029	-8.67576	-8.60446	-12.2055	-17.355	-663705	-50365.3	-476855	-392742	-736969	-256993
232.2	-0.846166	-9.30133	-5.30098	-8.53337	-8.3961	-12.0302	-17.0802	-648303	-49808	-469028	-383232	-726386	-252924
232.3	-0.813231	-9.18184	-5.33134	-8.54368	-8.42828	-11.9774	-16.8692	-639974	-50093.3	-469595	-384700	-723194	-249799
232.4	-0.895115	-8.9647	-5.19823	-8.36902	-8.22366	-11.8338	-16.477	-624840	-48842.5	-459995	-375361	-714524	-243991
232.5	-0.759691	-8.8236	-5.32346	-8.37035	-8.22929	-11.8177	-16.403	-615005	-50019.2	-460068	-375618	-713553	-242896
232.6	-0.759398	-8.67961	-5.11941	-8.2358	-8.0963	-11.6192	-16.1117	-604969	-48102	-452673	-369548	-701567	-238582
232.7	-0.682725	-8.55893	-5.19064	-8.17314	-8.02678	-11.494	-15.9362	-596558	-48771.2	-449228	-366374	-694006	-235983
232.8	-0.711364	-8.40835	-5.14075	-8.08434	-7.85465	-11.4067	-15.6294	-586062	-48302.4	-444347	-358517	-688739	-231441
232.9	-0.744013	-8.21554	-5.06739	-8.00464	-7.69752	-11.2243	-15.4482	-572623	-47613.2	-439967	-351345	-677722	-228757
233	-0.728124	-8.12017	-5.10387	-7.91973	-7.56578	-11.1916	-15.2014	-565976	-47955.9	-435300	-345332	-675747	-225102
233.1	-0.743308	-8.01288	-4.92087	-7.8007	-7.36053	-10.9739	-14.8796	-558498	-46236.5	-428758	-335964	-662604	-220337
233.2	-0.716698	-7.94008	-4.85368	-7.58042	-7.26229	-10.8215	-14.682	-553424	-45605.2	-416650	-331480	-653402	-217411
233.3	-0.76568	-7.77449	-4.71687	-7.39029	-7.17592	-10.6304	-14.4768	-541882	-44319.7	-406200	-327538	-641865	-214373
233.4	-0.868901	-7.49102	-4.58201	-7.09	-6.75075	-10.2858	-14.12	-522124	-43052.6	-389695	-308131	-621057	-209089
233.5	-0.906301	-7.31698	-4.47558	-6.96871	-6.59025	-10.0854	-13.7353	-509993	-42052.5	-383028	-300805	-608956	-203392
233.6	-0.949082	-7.12423	-4.38141	-6.88713	-6.4427	-9.86202	-13.4131	-496559	-41167.7	-378544	-294071	-595469	-198621
233.7	-0.936427	-7.06945	-4.40094	-6.83855	-6.28588	-9.71727	-13.1325	-492741	-41351.3	-375874	-286913	-586729	-194466
233.8	-0.985219	-6.85072	-4.19604	-6.74636	-6.12634	-9.50208	-12.8398	-477495	-39426	-370807	-279631	-573736	-190131
233.9	-0.930055	-6.82583	-4.19298	-6.65619	-6.12713	-9.33955	-12.6462	-475760	-39397.3	-365851	-279667	-563922	-187266
234	-1.03096	-6.67229	-4.05584	-6.47123	-5.94249	-9.01134	-12.3104	-465059	-38108.7	-355685	-271239	-544105	-182293
234.1	-0.929347	-6.64964	-4.13482	-6.49868	-5.91764	-8.94247	-12.1232	-463480	-38850.8	-357194	-270105	-539947	-179520
234.2	-0.95097	-6.63341	-4.10354	-6.4211	-5.9812	-8.75927	-11.8806	-462349	-38556.9	-352929	-273006	-528885	-175928
234.3	-0.89058	-6.55222	-4.16447	-6.41287	-6.01706	-8.74025	-11.6698	-456690	-39129.4	-352477	-274643	-527736	-172807
234.4	-0.950674	-6.44168	-4.10178	-6.25706	-5.91337	-8.5345	-11.5183	-448985	-38540.3	-343913	-269910	-515313	-170563
234.5	-0.89552	-6.43455	-4.06694	-6.16357	-5.96434	-8.4942	-11.3847	-448488	-38213	-338774	-272236	-512880	-168584
234.6	-0.840762	-6.35265	-4.04285	-6.02545	-5.93753	-8.41446	-11.2575	-442780	-37986.6	-331183	-271013	-508065	-166702
234.7	-0.757819	-6.42968	-4.1134	-6.07847	-5.90393	-8.32181	-11.1032	-448149	-38649.5	-334097	-269479	-502471	-164416
234.8	-0.69136	-6.41653	-4.14376	-6.02446	-5.9114	-8.30911	-11.0137	-447232	-38934.8	-331128	-269820	-501704	-163091
234.9	-0.67952	-6.31384	-4.09554	-5.91959	-5.79008	-8.27718	-10.9259	-440075	-38481.7	-325364	-264282	-499776	-161790
235	-0.682756	-6.16872	-4.04853	-5.85118	-5.67033	-7.96755	-10.7385	-429960	-38040	-321604	-258817	-481081	-159016
235.1	-0.572043	-6.09286	-4.07266	-5.87792	-5.67347	-7.94661	-10.6664	-424672	-38266.7	-323074	-258960	-479816	-157947
235.2	-0.565255	-6.01897	-3.90038	-5.74429	-5.5306	-7.79585	-10.4408	-419522	-36648	-315729	-252438	-470713	-154608
235.3	-0.578096	-5.959	-3.85644	-5.59721	-5.35341	-7.57008	-10.2203	-415343	-36235.1	-307645	-244351	-457082	-151342
235.4	-0.495439	-5.92513	-3.97488	-5.62236	-5.28675	-7.52113	-10.0331	-412982	-37348	-309027	-241308	-454126	-148570
235.5	-0.496531	-5.78787	-3.93268	-5.44841	-5.24292	-7.42435	-9.80787	-403414	-36951.5	-299466	-239308	-448282	-145235
235.6	-0.53964	-5.5724	-3.77744	-5.21083	-5.15906	-7.24065	-9.44452	-388396	-35492.8	-286408	-235480	-437190	-139854
235.7	-0.533046	-5.43951	-3.78403	-5.20296	-5.08648	-7.0932	-9.23941	-379134	-35554.8	-285976	-232167	-428288	-136817
235.8	-0.507454	-5.45739	-3.77724	-5.10441	-5.11421	-7.17437	-9.03348	-380380	-35490.9	-280559	-233433	-433188	-133768
235.9	-0.536866	-5.3609	-3.71707	-4.88194	-5.01717	-7.01385	-8.81181	-373655	-34925.6	-268331	-229004	-423497	-130485
236	-0.563611	-5.22133	-3.72905	-4.77411	-4.82563	-6.85314	-8.63375	-363927	-35038.1	-262404	-220261	-413793	-127849
236.1	-0.640622	-4.93584	-3.63593	-4.62318	-4.74502	-6.69954	-8.40327	-344028	-34163.2	-254108	-216582	-404518	-124436
236.2	-0.667048	-4.89001	-3.43576	-4.5712	-4.68104	-6.5585	-8.20738	-340834	-32282.4	-251252	-213661	-396002	-121535
236.3	-0.687356	-4.77691	-3.38871	-4.51651	-4.61408	-6.41793	-7.99407	-332951	-31840.4	-248246	-210605	-387515	-118376
236.4	-0.690655	-4.66551	-3.32988	-4.44416	-4.52084	-6.24812	-7.86423	-325186	-31287.6	-244269	-206349	-377261	-116453
236.5	-0.758997	-4.58169	-3.23618	-4.2842	-4.30184	-6.05447	-7.74536	-319344	-30407.2	-235477	-196353	-365569	-114693
236.6	-0.786106	-4.37759	-3.14907	-4.22766	-4.19639	-5.81822	-7.54279	-305118	-29588.7	-232369	-191540	-351304	-111694
236.7	-0.834439	-4.28462	-2.91416	-4.10334	-3.99209	-5.57041	-7.29724	-298638	-27381.5	-225536	-182215	-336341	-108058
236.8	-0.835302	-4.18539	-2.85036	-4.05795	-3.9303	-5.29887	-7.15415	-291722	-26782	-223041	-179395	-319946	-105939
236.9	-0.90083	-4.0704	-2.72399	-3.86659	-3.80835	-5.11369	-6.93513	-283707	-25594.6	-212523	-173828	-308765	-102695
237	-0.797847	-4.04216	-2.81805	-3.86212	-3.75697	-5.06628	-6.86211	-281739	-26478.4	-212278	-171483	-305902	-101614
237.1	-0.784309	-3.95818	-2.73799	-3.82551	-3.64168	-4.96709	-6.66928	-275885	-25726.2	-210265	-166221	-299913	-98758.7
237.2	-0.76348	-3.93266	-2.66178	-3.77471	-3.51849	-4.83937	-6.58053	-274106	-25010.1	-207473	-160598	-292201	-97444.5
237.3	-0.689859	-3.88026	-2.68721	-3.70991	-3.5183	-4.83978	-6.41152	-270454	-25249	-203912	-160589	-292226	-94941.8
237.4	-0.594352	-3.93309	-2.77095	-3.71551	-3.53538	-4.85821	-6.30119	-274136	-26035.8	-204219	-161369	-293339	-93308
237.5	-0.638093	-3.80037	-2.77117	-3.60796	-3.32623	-4.77052	-6.14317	-264886	-26037.9	-198308	-151822	-288044	-90968
237.6	-0.648499	-3.75215	-2.67664	-3.47725	-3.18835	-4.72937	-5.93254	-261525	-25149.7	-191124	-145529	-285559	-87849.1
237.7	-0.548181	-3.76161	-2.66364	-3.52865	-3.2036	-4.7304	-5.90941	-262184	-25027.6	-193949	-146225	-285621	-87506.5
237.8	-0.602215	-3.59805	-2.58385	-3.32287	-3.09401	-4.61834	-5.74104	-250784	-24277.9	-182639	-141223	-278856	-85013.2
237.9	-0.525321	-3.70904	-2.62967	-3.24586	-3.03618	-4.65533	-5.70027	-258520	-24708.4	-178405	-138583	-281089	-84409.6
238	-0.576908	-3.59886	-2.59694	-3.12135	-2.86622	-4.52532	-5.58137	-250841	-24400.9	-171562	-130826	-273239	-82649
238.1	-0.611168	-3.45	-2.52772	-3.12943	-2.8644	-4.47872	-5.34713	-240465	-23750.5	-172006	-130743	-270425	-79180.3
238.2	-0.650688	-3.38201	-2.42821	-3.04165	-2.77966	-4.37371	-5.22997	-235726	-22815.5	-167181	-126875	-264085	-77445.4
238.3	-0.656152	-3.33354	-2.41742	-3.08748	-2.69816	-4.3039	-5.11011	-232348	-22714.1	-169700	-123155	-259869	-75670.5
238.4	-0.663504	-3.21816	-2.39099	-2.95472	-2.6698	-4.22635	-5.05646	-224305	-22465.7	-162403	-121860	-255187	-74876
238.5	-0.613787	-3.16662	-2.44032	-2.95967	-2.73666	-4.16705	-5.00922	-220714	-22929.3	-162675	-124912	-251607	-74176.6
238.6	-0.628058	-3.11188	-2.4844	-2.95767	-2.69745	-4.1399	-4.85367	-216898	-23343.4	-162565	-123122	-249967	-71873.2
238.7	-0.67861	-3.02974	-2.34438	-2.86115	-2.62753	-3.88763	-4.59857	-211173	-22027.8	-157260	-119931	-234735	-68095.6
238.8	-0.751616	-2.80528	-2.25917	-2.7555	-2.52105	-3.71544	-4.40109	-195528	-21227.2	-151454	-115071	-224339	-65171.4
238.9	-0.710138	-2.82931	-2.20322	-2.6563	-2.47974	-3.59533	-4.33238	-197203	-20701.5	-146001	-113185	-217086	-64153.9
239	-0.726267	-2.8212	-2.0688	-2.53586	-2.38674	-3.43551	-4.27984	-196638	-19438.5	-139381	-108940	-207436	-63375.9
239.1	-0.714921	-2.79697	-2.03697	-2.54741	-2.44115	-3.38828	-4.1881	-194949	-19139.4	-140016	-111424	-204584	-62017.4
239.2	-0.716721	-2.70301	-1.97338	-2.51863	-2.39921	-3.26306	-4.04912	-188400	-18541.9	-138434	-109509	-197024	-59959.4
239.3	-0.694889	-2.6078	-1.95873	-2.47551	-2.41777	-3.2013	-3.92942	-181764	-18404.2	-136064	-110357	-193295	-58186.9
239.4	-0.698481	-2.5752	-1.89609	-2.32995	-2.30532	-3.03096	-3.88527	-179491	-17815.7	-128063	-105224	-183009	-57533.1
239.5	-0.608216	-2.60762	-1.94763	-2.38708	-2.31775	-3.07955	-3.94058	-181751	-18300	-131204	-105792	-185943	-58352.2
239.6	-0.62701	-2.61404	-1.94641	-2.25319	-2.27314	-3.03156	-3.92214	-182199	-18288.5	-123844	-103755	-183046	-58079
239.7	-0.540058	-2.66096	-2.03031	-2.35701	-2.35705	-3.11143	-3.88861	-185469	-19076.8	-129551	-107585	-187868	-57582.6
239.8	-0.524813	-2.60251	-2.11382	-2.37095	-2.23817	-3.03302	-3.9127	-181395	-19861.4	-130317	-102159	-183134	-57939.2
239.9	-0.561417	-2.59379	-2.03375	-2.25593	-2.05955	-2.95149	-3.77127	-180787	-19109.1	-123995	-94006.2	-178211	-55845
240	-0.499567	-2.67454	-1.99873	-2.18019	-2.02262	-2.94589	-3.70415	-186416	-18780.1	-119832	-92320.6	-177873	-54851.1
240.1	-0.557366	-2.53501	-1.89715	-2.12136	-1.85633	-2.80491	-3.55288	-176690	-17825.7	-116599	-84730.5	-169361	-52611.1
240.2	-0.541173	-2.51401	-1.83986	-2.06292	-1.83337	-2.82148	-3.4523	-175226	-17287.3	-113386	-83682.2	-170361	-51121.6
240.3	-0.532527	-2.43481	-1.81794	-2.04728	-1.75326	-2.7677	-3.3299	-169706	-17081.4	-112527	-80025.9	-167114	-49309.2
240.4	-0.50071	-2.35127	-1.70674	-2.08684	-1.71723	-2.6409	-3.23497	-163884	-16036.5	-114701	-78381.2	-159458	-47903.4
240.5	-0.593011	-2.22181	-1.6223	-1.94209	-1.56978	-2.41086	-2.98968	-154860	-15243.1	-106745	-71651	-145568	-44271.2
240.6	-0.670615	-2.10119	-1.44378	-1.75964	-1.48016	-2.34419	-2.86005	-146453	-13565.8	-96716.6	-67560.2	-141542	-42351.5
240.7	-0.734669	-2.01341	-1.31886	-1.63279	-1.39009	-2.13658	-2.5819	-140335	-12392	-89744.7	-63449.3	-129007	-38232.8
240.8	-0.754473	-1.90303	-1.2926	-1.47265	-1.35526	-2.02388	-2.55386	-132641	-12145.2	-80942.6	-61859.4	-122202	-37817.5
240.9	-0.703136	-1.91548	-1.4033	-1.50996	-1.47189	-2.05433	-2.55356	-133509	-13185.4	-82993.7	-67183.1	-124041	-37813.2
241	-0.659249	-2.01607	-1.43424	-1.49888	-1.50214	-1.9368	-2.47718	-140520	-13476.1	-82384.5	-68563.7	-116944	-36682.1
241.1	-0.663321	-1.90911	-1.35444	-1.47156	-1.46927	-1.89003	-2.44093	-133065	-12726.3	-80882.8	-67063.3	-114120	-36145.3
241.2	-0.732529	-1.78629	-1.24901	-1.31382	-1.41684	-1.83625	-2.25311	-124504	-11735.7	-72212.9	-64670.3	-110873	-33364.1
241.3	-0.695114	-1.8021	-1.29518	-1.25284	-1.3431	-1.79002	-2.34659	-125606	-12169.5	-68860.9	-61304.3	-108081	-34748.2
241.4	-0.599986	-1.82934	-1.30361	-1.33403	-1.4396	-1.86045	-2.31959	-127505	-12248.8	-73323.8	-65709.3	-112334	-34348.5
241.5	-0.54179	-1.78359	-1.43123	-1.33645	-1.3948	-1.89861	-2.33335	-124316	-13447.8	-73456.6	-63664.3	-114638	-34552.2
241.6	-0.537694	-1.61165	-1.32867	-1.2974	-1.336	-1.88654	-2.248	-112332	-12484.1	-71310.1	-60980.2	-113909	-33288.3
241.7	-0.545398	-1.50664	-1.33462	-1.23971	-1.29974	-1.78575	-2.09883	-105013	-12540.1	-68139.5	-59325.4	-107824	-31079.5
241.8	-0.529121	-1.51064	-1.39689	-1.21613	-1.25842	-1.79594	-2.06873	-105292	-13125.2	-66843.3	-57439.3	-108439	-30633.7
241.9	-0.582772	-1.39516	-1.34692	-1.08584	-1.12846	-1.74073	-1.97421	-97242.5	-12655.6	-59682	-51507.3	-105105	-29234.1
242	-0.600814	-1.34373	-1.30944	-1.12315	-1.00918	-1.65849	-1.82367	-93657.7	-12303.5	-61732.6	-46062.8	-100139	-27004.8
242.1	-0.578228	-1.36919	-1.31542	-1.14121	-1.07509	-1.64846	-1.74873	-95432.7	-12359.7	-62725.6	-49071.5	-99534.1	-25895.2
242.2	-0.547299	-1.40504	-1.42136	-1.14862	-1.12291	-1.67137	-1.70507	-97931.4	-13355.1	-63132.8	-51254.1	-100917	-25248.7
242.3	-0.560755	-1.33284	-1.26227	-1.08107	-1.1032	-1.56618	-1.69166	-92898.6	-11860.3	-59419.7	-50354.7	-94566.3	-25050.2
242.4	-0.56041	-1.42944	-1.22491	-1.13619	-1.21158	-1.55794	-1.68619	-99632	-11509.3	-62449.5	-55301.4	-94068.4	-24969.1
242.5	-0.573994	-1.4665	-1.1829	-1.1413	-1.16229	-1.47104	-1.62735	-102215	-11114.5	-62730.2	-53051.4	-88821.2	-24097.7
242.6	-0.616211	-1.45395	-1.0581	-1.0566	-1.0762	-1.38957	-1.528	-101340	-9941.9	-58074.9	-49122	-83902.2	-22626.6
242.7	-0.588934	-1.36269	-1.10498	-1.06514	-1.10996	-1.40579	-1.43092	-94979.2	-10382.4	-58544.1	-50662.8	-84881.4	-21189
242.8	-0.595493	-1.31711	-1.1163	-0.984947	-1.07599	-1.34843	-1.41127	-91802.4	-10488.7	-54136.6	-49112.4	-81418	-20898
242.9	-0.66363	-1.18405	-1.07544	-0.77825	-1.06582	-1.21585	-1.23074	-82528.3	-10104.8	-42775.7	-48648.3	-73413	-18224.8
243	-0.71871	-1.17573	-0.94091	-0.66373	-0.99572	-1.1085	-1.07609	-81948.4	-8840.79	-36481.3	-45448.6	-66931.2	-15934.7
243.1	-0.737585	-1.12952	-0.949715	-0.696705	-0.835125	-1.05017	-1.01197	-78727.2	-8923.52	-38293.7	-38118.4	-63409.6	-14985.2
243.2	-0.741346	-1.04288	-1.01291	-0.591304	-0.751434	-1.02822	-0.932724	-72689	-9517.34	-32500.4	-34298.5	-62084.2	-13811.8
243.3	-0.814051	-0.917339	-0.922879	-0.536609	-0.649949	-0.922559	-0.813619	-63938.5	-8671.37	-29494.2	-29666.3	-55704.1	-12048.1
243.4	-0.760198	-0.976512	-0.911772	-0.551872	-0.625412	-0.929612	-0.870272	-68062.9	-8567.01	-30333.1	-28546.3	-56130	-12887
243.5	-0.843805	-0.849305	-0.766075	-0.456415	-0.549485	-0.795585	-0.760075	-59196.6	-7198.04	-25086.4	-25080.7	-48037.4	-11255.2
243.6	-0.842977	-0.818343	-0.715353	-0.408263	-0.538353	-0.788343	-0.754783	-57038.5	-6721.46	-22439.8	-24572.6	-47600.2	-11176.8
243.7	-0.820535	-0.825745	-0.730245	-0.431145	-0.526045	-0.836225	-0.804855	-57554.4	-6861.38	-23697.5	-24010.8	-50491.3	-11918.3
243.8	-0.843062	-0.806358	-0.657678	-0.411438	-0.443688	-0.793278	-0.838858	-56203.2	-6179.54	-22614.3	-20251.7	-47898.1	-12421.8
243.9	-0.841667	-0.743943	-0.608383	-0.391363	-0.507153	-0.766983	-0.808583	-51852.8	-5716.37	-21510.9	-23148.5	-46310.4	-11973.5
244	-0.792063	-0.862077	-0.625287	-0.395887	-0.565637	-0.793137	-0.765557	-60086.8	-5875.2	-21759.5	-25817.9	-47889.6	-11336.4
244.1	-0.784053	-0.663237	-0.567697	-0.388617	-0.516967	-0.788967	-0.672057	-46227.6	-5334.08	-21359.9	-23596.4	-47637.8	-9951.82
244.2	-0.847922	-0.595978	-0.593748	-0.223678	-0.409248	-0.679138	-0.513948	-41539.7	-5578.86	-12294.2	-18679.7	-41006.4	-7610.54
244.3	-0.819686	-0.602864	-0.615494	-0.201134	-0.444944	-0.738254	-0.483304	-42019.6	-5783.18	-11055.1	-20309	-44575.8	-7156.77
244.4	-0.678397	-0.795213	-0.767003	-0.362873	-0.524233	-0.797633	-0.592313	-55426.3	-7206.76	-19945	-23928.1	-48161.1	-8770.97
244.5	-0.667555	-0.851805	-0.789715	-0.399695	-0.549695	-0.796875	-0.501275	-59370.8	-7420.16	-21968.8	-25090.3	-48115.3	-7422.88
244.6	-0.659248	-0.742862	-0.788592	-0.428082	-0.564032	-0.753752	-0.508402	-51777.5	-7409.61	-23529.1	-25744.7	-45511.5	-7528.42
244.7	-0.682119	-0.741751	-0.656511	-0.438031	-0.472131	-0.796981	-0.417751	-51700	-6168.58	-24075.9	-21549.9	-48121.7	-6186.06
244.8	-0.713249	-0.678721	-0.623621	-0.435011	-0.339171	-0.721791	-0.389371	-47306.9	-5859.54	-23909.9	-15481.1	-43581.7	-5765.81
244.9	-0.690242	-0.716568	-0.672858	-0.415818	-0.300528	-0.703078	-0.499718	-49944.8	-6322.17	-22855	-13717.3	-42451.8	-7399.82
245	-0.677685	-0.737065	-0.654495	-0.389465	-0.333135	-0.668075	-0.474225	-51373.4	-6149.64	-21406.6	-15205.6	-40338.4	-7022.32
245.1	-0.679161	-0.749049	-0.586159	-0.400109	-0.330949	-0.643899	-0.474459	-52208.7	-5507.55	-21991.6	-15105.8	-38878.6	-7025.79
245.2	-0.734908	-0.617162	-0.502762	-0.283862	-0.224898	-0.479642	-0.423742	-43016.2	-4723.95	-15602.2	-10265.2	-28960.8	-6274.77
245.3	-0.81556	-0.40298	-0.41662	-0.18748	-0.019906	-0.40647	-0.34541	-28087.7	-3914.56	-10304.7	-908.589	-24542.7	-5114.83
245.4	-0.829348	-0.354542	-0.399532	-0.114988	0.009075	-0.253712	-0.277942	-24711.6	-3754	-6320.2	414.219	-15319.1	-4115.77
245.5	-0.797663	-0.380367	-0.483537	-0.042184	0.060235	-0.281217	-0.263087	-26511.6	-4543.31	-2318.6	2749.37	-16979.9	-3895.79
245.6	-0.786773	-0.342797	-0.497297	-0.032617	0.100508	-0.209873	-0.336497	-23893	-4672.6	-1792.76	4587.59	-12672.1	-4982.85
245.7	-0.769138	-0.296562	-0.497602	-0.141081	0.050587	-0.238512	-0.333172	-20670.4	-4675.47	-7754.38	2308.99	-14401.4	-4933.61
245.8	-0.692698	-0.327362	-0.480522	-0.193696	-0.046227	-0.230617	-0.367522	-22817.1	-4514.98	-10646.3	-2109.99	-13924.7	-5442.27
245.9	-0.711952	-0.352438	-0.499688	-0.100705	-0.019821	-0.246069	-0.389398	-24564.9	-4695.07	-5535.15	-904.71	-14857.6	-5766.21
246	-0.786287	-0.214573	-0.405583	-0.103444	0.011396	-0.174928	-0.369303	-14955.7	-3810.86	-5685.7	520.159	-10562.2	-5468.64
246.1	-0.69764	-0.292987	-0.53661	-0.225347	-0.073591	-0.301245	-0.44083	-20421.2	-5041.99	-12386	-3358.99	-18189.2	-6527.81
246.2	-0.66997	-0.35304	-0.47203	-0.172811	-0.088306	-0.3615	-0.38125	-24606.9	-4435.19	-9498.38	-4030.64	-21827.4	-5645.55
246.3	-0.682176	-0.278251	-0.407534	-0.178905	-0.041029	-0.334064	-0.340104	-19394.1	-3829.19	-9833.33	-1872.73	-20170.8	-5036.26
246.4	-0.667824	-0.338116	-0.454756	-0.153739	-0.088443	-0.23428	-0.312492	-23566.7	-4272.89	-8450.11	-4036.89	-14145.8	-4627.38
246.5	-0.759565	-0.249025	-0.396505	0.062271	0.064779	-0.179384	-0.238872	-17357	-3725.56	3422.66	2956.77	-10831.2	-3537.22
246.6	-0.78995	-0.36156	-0.40858	0.098502	-0.00216	-0.194859	-0.142921	-25200.7	-3839.02	5414.06	-98.591	-11765.6	-2116.37
246.7	-0.713787	-0.335463	-0.504153	0.006069	-0.019058	-0.274094	-0.263129	-23381.8	-4737.02	333.577	-869.883	-16549.8	-3896.41
246.8	-0.684725	-0.375985	-0.513135	0.045531	0.03847	-0.292382	-0.215594	-26206.2	-4821.42	2502.57	1755.92	-17654	-3192.52
246.9	-0.724661	-0.435169	-0.396329	0.07872	0.088814	-0.254309	-0.206975	-30331.3	-3723.91	4326.77	4053.83	-15355.2	-3064.89
247	-0.7172	-0.38122	-0.44375	0.064459	-0.01063	-0.175849	-0.277271	-26571	-4169.47	3542.92	-485.196	-10617.8	-4105.83
247.1	-0.72028	-0.41412	-0.49648	0.11611	-0.0626	-0.226982	-0.25025	-28864.2	-4664.93	6381.87	-2857.31	-13705.2	-3705.7
247.2	-0.722156	-0.369574	-0.475854	0.077085	-0.055852	-0.340474	-0.287714	-25759.3	-4471.12	4236.9	-2549.31	-20557.8	-4260.47
247.3	-0.668742	-0.461088	-0.534928	-0.056631	-0.167043	-0.410858	-0.256209	-32137.8	-5026.18	-3112.67	-7624.51	-24807.6	-3793.94
247.4	-0.695741	-0.331519	-0.526609	-0.06946	-0.123055	-0.262853	-0.270741	-23106.9	-4948.02	-3817.8	-5616.72	-15871.1	-4009.13
247.5	-0.692554	-0.340656	-0.534866	-0.113145	-0.134262	-0.337366	-0.22626	-23743.7	-5025.6	-6218.9	-6128.25	-20370.2	-3350.46
247.6	-0.655605	-0.378685	-0.564425	-0.151247	-0.129205	-0.439625	-0.236943	-26394.3	-5303.34	-8313.14	-5897.43	-26544.6	-3508.65
247.7	-0.693775	-0.26232	-0.489475	-0.03106	-0.04001	-0.348285	-0.120804	-18283.7	-4599.11	-1707.18	-1826.22	-21029.4	-1788.87
247.8	-0.724102	-0.194265	-0.471118	0.052641	0.019757	-0.337878	-0.081171	-13540.3	-4426.62	2893.36	901.789	-20401.1	-1201.98
247.9	-0.711448	-0.289022	-0.445912	-0.006503	0.049927	-0.339972	-0.016376	-20144.8	-4189.79	-357.431	2278.87	-20527.5	-242.496
248	-0.70108	-0.40386	-0.34817	0.008588	0.062922	-0.32005	0.033194	-28149	-3271.41	472.031	2872.01	-19324.6	491.537
248.1	-0.723106	-0.326544	-0.237173	0.120771	0.168032	-0.190794	0.031538	-22760.1	-2228.48	6638.06	7669.65	-11520.1	467.015
248.2	-0.65574	-0.40245	-0.256438	0.0801	0.108167	-0.259341	0.011479	-28050.8	-2409.49	4402.62	4937.17	-15659	169.981
248.3	-0.684137	-0.425873	-0.165826	0.139898	0.254725	-0.172317	-0.002966	-29683.3	-1558.1	7689.35	11626.7	-10404.5	-43.9205
248.4	-0.669443	-0.368827	-0.211394	0.064391	0.154423	-0.049214	-0.050108	-25707.2	-1986.26	3539.19	7048.48	-2971.54	-741.999
248.5	-0.727525	-0.329435	-0.122205	0.094094	0.17267	-0.028608	-0.013435	-22961.6	-1148.24	5171.78	7881.35	-1727.35	-198.945
248.6	-0.724965	-0.318705	-0.131803	0.05657	0.099375	-0.136287	-0.038655	-22213.7	-1238.42	3109.31	4535.87	-8229.01	-572.403
248.7	-0.731317	-0.238475	-0.119197	0.030982	0.1205	-0.087458	-0.091315	-16621.7	-1119.98	1702.89	5500.1	-5280.71	-1352.19
248.8	-0.723518	-0.192415	-0.179838	0.028693	0.130938	-0.010118	-0.153014	-13411.3	-1689.76	1577.08	5976.53	-610.925	-2265.83
248.9	-0.703088	-0.166462	-0.20659	-0.005431	0.106577	-0.074492	-0.134463	-11602.4	-1941.12	-298.509	4864.6	-4497.83	-1991.13
249	-0.712862	-0.174095	-0.177032	-0.004729	0.062291	-0.049681	-0.13794	-12134.4	-1663.39	-259.925	2843.21	-2999.74	-2042.62
249.1	-0.695105	-0.145193	-0.177379	-0.028539	0.042887	-0.16292	-0.159703	-10120	-1666.65	-1568.62	1957.53	-9837.11	-2364.88
249.2	-0.722588	-0.12446	-0.153333	0.016849	0.092895	-0.234469	-0.037161	-8674.86	-1440.72	926.088	4240.1	-14157.2	-550.28
249.3	-0.657502	-0.115548	-0.260318	-0.034341	0.067131	-0.276088	-0.118137	-8053.7	-2445.95	-1887.52	3064.13	-16670.2	-1749.37
249.4	-0.545234	-0.298689	-0.346409	-0.222316	0.038455	-0.243625	-0.205289	-20818.6	-3254.86	-12219.4	1755.24	-14710.1	-3039.92
249.5	-0.554017	-0.303201	-0.279571	-0.139373	0.027374	-0.267763	-0.264182	-21133.1	-2626.85	-7660.5	1249.46	-16167.5	-3912.01
249.6	-0.557949	-0.290969	-0.267628	-0.172163	0.073654	-0.310683	-0.247999	-20280.5	-2514.63	-9462.77	3361.86	-18759	-3672.37
249.7	-0.571115	-0.316463	-0.304231	-0.207443	0.114283	-0.378474	-0.247043	-22057.5	-2858.55	-11401.9	5216.33	-22852.3	-3658.21
249.8	-0.531091	-0.349346	-0.40028	-0.203359	0.106594	-0.396249	-0.320369	-24349.4	-3761.03	-11177.4	4865.38	-23925.5	-4744.02
249.9	-0.567141	-0.332972	-0.469629	-0.169123	0.087968	-0.259957	-0.278123	-23208.1	-4412.63	-9295.68	4015.21	-15696.2	-4118.45
250	-0.597874	-0.276739	-0.380124	-0.14932	0.166645	-0.272661	-0.242876	-19288.7	-3571.65	-8207.22	7606.34	-16463.3	-3596.51
250.1	-0.603194	-0.265189	-0.421606	-0.222853	0.133675	-0.271923	-0.182709	-18483.7	-3961.41	-12248.9	6101.46	-16418.7	-2705.55
250.2	-0.66842	-0.14984	-0.37788	-0.090733	0.111195	-0.279615	-0.126506	-10443.8	-3550.56	-4987.05	5075.38	-16883.2	-1873.3
250.3	-0.743304	-0.152143	-0.331386	-0.016011	0.184387	-0.237037	0.084674	-10604.4	-3113.7	-880.029	8416.16	-14312.3	1253.85
250.4	-0.708856	-0.114437	-0.334854	-0.027233	0.150817	-0.298124	0.022736	-7976.26	-3146.29	-1496.83	6883.89	-18000.7	336.675
250.5	-0.725538	-0.021839	-0.323472	0.00959	0.11418	-0.219448	0.112248	-1522.18	-3039.34	527.105	5211.63	-13250.3	1662.17
250.6	-0.741473	0.048238	-0.189752	-0.046863	0.183213	-0.118532	0.143747	3362.19	-1782.91	-2575.78	8362.57	-7156.96	2128.61
250.7	-0.789518	0.078093	-0.027925	-0.015675	0.305811	-0.106503	0.225805	5443.08	-262.383	-861.561	13958.4	-6430.65	3343.72
250.8	-0.72298	-0.010835	-0.124833	-0.016451	0.335767	-0.169318	0.172053	-755.2	-1172.93	-904.213	15325.7	-10223.4	2547.76
250.9	-0.752917	0.018553	-0.03671	0.04641	0.316803	-0.02818	0.107812	1293.14	-344.927	2550.88	14460.2	-1701.51	1596.48
251	-0.751856	0.012846	-0.011473	0.066053	0.325799	-0.068944	0.117551	895.366	-107.8	3630.54	14870.8	-4162.84	1740.7
251.1	-0.683106	0.027042	-0.050734	0.047974	0.376006	-0.052961	-0.006297	1884.83	-476.697	2636.84	17162.4	-3197.79	-93.246
251.2	-0.738452	0.123399	-0.012839	0.13425	0.396583	0.021034	0.001595	8600.91	-120.635	7378.92	18101.6	1270.03	23.6188
251.3	-0.72077	0.055674	-0.019718	0.158877	0.410581	0.043068	-0.028675	3880.48	-185.27	8732.52	18740.6	2600.45	-424.619
251.4	-0.715086	0.045287	-0.049528	0.188617	0.364335	-0.074237	-0.0777	3156.5	-465.365	10367.1	16629.7	-4482.43	-1150.58
251.5	-0.674461	0.022394	-0.158366	0.24639	0.322528	-0.079633	-0.073046	1560.86	-1488.01	13542.6	14721.5	-4808.24	-1081.67
251.6	-0.622057	-0.012179	-0.184318	0.240506	0.152739	-0.0901	-0.143704	-848.876	-1731.85	13219.2	6971.62	-5440.24	-2127.97
251.7	-0.64208	0.046951	-0.146387	0.25255	0.15994	-0.083346	-0.045212	3272.48	-1375.45	13881.2	7300.3	-5032.43	-669.499
251.8	-0.61147	-0.024331	-0.215185	0.213275	0.155919	-0.123714	-0.063855	-1695.87	-2021.88	11722.4	7116.77	-7469.85	-945.565
251.9	-0.590894	-0.05757	-0.233429	0.198611	0.12611	-0.125688	-0.063171	-4012.63	-2193.3	10916.5	5756.16	-7589.04	-935.436
252	-0.528984	-0.148816	-0.263815	0.06267	0.03367	-0.249672	-0.062112	-10372.5	-2478.81	3444.59	1536.83	-15075.2	-919.754
252.1	-0.555272	-0.137937	-0.21922	0.023512	0.04422	-0.154879	-0.062477	-9614.21	-2059.79	1292.31	2018.38	-9351.59	-925.159
252.2	-0.581147	-0.215888	-0.178137	0.00415	0.129495	-0.096362	-0.040675	-15047.4	-1673.78	228.101	5910.67	-5818.34	-602.315
252.3	-0.580183	-0.165773	-0.157939	0.021408	0.123458	-0.067442	-0.110665	-11554.4	-1483.99	1176.67	5635.12	-4072.15	-1638.73
252.4	-0.684868	-0.028812	-0.010804	0.090844	0.207687	0.04716	0.025362	-2008.2	-101.514	4993.15	9479.67	2847.52	375.56
252.5	-0.795926	0.010228	0.010806	0.198173	0.403555	0.146339	0.107492	712.892	101.533	10892.4	18419.9	8835.95	1591.74
252.6	-0.733141	-0.142478	-0.051106	0.209547	0.343438	0.121369	0.065885	-9930.72	-480.192	11517.5	15675.9	7328.26	975.625
252.7	-0.69429	-0.239675	-0.109232	0.166204	0.287282	0.142728	0.001806	-16705.3	-1026.34	9135.24	13112.7	8617.92	26.7432
252.8	-0.813775	-0.096005	-0.045907	0.308202	0.41627	0.317818	0.103869	-6691.55	-431.342	16940	19000.2	19189.9	1538.09
252.9	-0.748872	-0.1783	-0.097274	0.310435	0.420117	0.223764	-0.052296	-12427.5	-913.987	17062.7	19175.8	13510.9	-774.399
253	-0.773689	-0.104083	-0.045846	0.361391	0.379581	0.293974	0.068565	-7254.59	-430.769	19863.5	17325.6	17750.2	1015.31
253.1	-0.739587	-0.161634	-0.053682	0.314776	0.285963	0.219932	0.033029	-11265.9	-504.396	17301.3	13052.5	13279.5	489.093
253.2	-0.703047	-0.201315	-0.101909	0.289217	0.28734	0.187534	-0.03197	-14031.7	-957.537	15896.5	13115.3	11323.3	-473.412
253.3	-0.529618	-0.423956	-0.24036	0.141963	0.051533	0.026153	-0.208427	-29549.7	-2258.42	7802.85	2352.17	1579.12	-3086.39
253.4	-0.551801	-0.406098	-0.180575	0.172055	0.076371	0.116065	-0.201777	-28305	-1696.68	9456.83	3485.88	7008	-2987.91
253.5	-0.535548	-0.43175	-0.171613	0.232316	0.041339	0.020647	-0.126497	-30093	-1612.48	12769	1886.88	1246.67	-1873.17
253.6	-0.486276	-0.435373	-0.196521	0.181316	-0.034561	-0.021821	-0.148596	-30345.5	-1846.51	9965.85	-1577.5	-1317.55	-2200.41
253.7	-0.537316	-0.227387	-0.137571	0.119547	0.074672	0.041584	-0.015182	-15848.9	-1292.62	6570.78	3408.33	2510.84	-224.815
253.8	-0.499607	-0.212208	-0.141407	0.063907	0.072275	-0.021194	-0.108548	-14790.9	-1328.66	3512.58	3298.92	-1279.69	-1607.38
253.9	-0.49335	-0.189585	-0.18363	0.03467	0.094847	-0.012984	-0.089885	-13214.1	-1725.39	1905.6	4329.2	-783.974	-1331.02
254	-0.456535	-0.139451	-0.213982	0.008194	0.094075	-0.131985	-0.169637	-9719.73	-2010.57	450.375	4293.96	-7969.25	-2511.98
254.1	-0.542322	-0.073607	-0.028205	0.101467	0.162008	-0.078616	-0.004791	-5130.41	-265.014	5577.03	7394.69	-4746.83	-70.9451
254.2	-0.554724	0.000865	-0.086223	0.078557	0.12772	-0.097858	-0.014332	60.2905	-810.151	4317.81	5829.65	-5908.67	-212.228
254.3	-0.577564	0.044699	-0.082653	0.08191	0.231059	-0.03146	-0.03132	3115.52	-776.608	4502.1	10546.5	-1899.55	-463.787
254.4	-0.63434	0.167379	-0.049834	0.084637	0.286124	-0.037537	0.068354	11666.3	-468.24	4651.99	13059.8	-2266.48	1012.19
254.5	-0.60286	0.031619	-0.041743	0.177119	0.178952	-0.130531	-0.045063	2203.84	-392.217	9735.17	8168.09	-7881.46	-667.293
254.6	-0.577774	-0.105532	-0.172712	0.173954	0.138263	-0.15701	-0.117878	-7355.58	-1622.8	9561.21	6310.88	-9480.26	-1745.54
254.7	-0.619443	-0.180215	-0.115074	0.308434	0.18464	-0.058609	-0.10983	-12561	-1081.24	16952.8	8427.71	-3538.81	-1626.36
254.8	-0.593332	-0.224222	-0.110345	0.293766	0.153191	0.052094	-0.122442	-15628.3	-1036.8	16146.6	6992.25	3145.44	-1813.12
254.9	-0.645748	-0.10565	-0.065897	0.27994	0.202501	0.113584	-0.037458	-7363.81	-619.168	15386.6	9242.96	6858.2	-554.678
255	-0.678444	-0.110552	-0.030388	0.257689	0.276225	0.132157	-0.071102	-7705.47	-285.526	14163.6	12608	7979.64	-1052.88
255.1	-0.675795	-0.112677	0.037458	0.250327	0.34081	0.169111	-0.035998	-7853.59	351.955	13759	15555.9	10210.9	-533.058
255.2	-0.621893	-0.178971	-0.024207	0.204229	0.192501	0.115466	-0.09725	-12474.3	-227.449	11225.2	8786.52	6971.84	-1440.08
255.3	-0.630865	-0.13985	0.064777	0.169251	0.252837	0.127975	-0.083743	-9747.55	608.645	9302.71	11540.5	7727.13	-1240.07
255.4	-0.680411	-0.087426	0.078546	0.197734	0.238165	0.203933	-0.019476	-6093.59	738.018	10868.3	10870.8	12313.5	-288.401
255.5	-0.668427	0.023491	0.108995	0.239848	0.204513	0.213429	0.007119	1637.32	1024.12	13183	9334.79	12886.8	105.418
255.6	-0.691281	0.022652	0.079878	0.216054	0.303767	0.117343	0.056096	1578.84	750.534	11875.2	13865.1	7085.17	830.67
255.7	-0.707982	0.076138	0.05233	0.265018	0.356756	0.073135	0.141857	5306.82	491.693	14566.4	16283.8	4415.89	2100.62
255.8	-0.727373	0.206737	0.073999	0.364133	0.36353	0.120302	0.229053	14409.6	695.295	20014.2	16593	7263.83	3391.82
255.9	-0.726564	0.140186	0.034948	0.392387	0.338414	0.066994	0.270317	9770.96	328.371	21567.2	15446.6	4045.1	4002.85
256	-0.783988	0.230044	0.060933	0.469014	0.436767	0.152462	0.318288	16034.1	572.526	25778.9	19935.8	9205.66	4713.21
256.1	-0.820431	0.339153	0.067985	0.507889	0.407291	0.256003	0.354475	23639	638.787	27915.6	18590.4	15457.5	5249.07
256.2	-0.836885	0.330193	0.078903	0.467775	0.491359	0.3266	0.417988	23014.5	741.373	25710.8	22427.6	19720.1	6189.57
256.3	-0.875379	0.410654	0.128494	0.433984	0.545556	0.197889	0.458275	28622.6	1207.33	23853.5	24901.4	11948.5	6786.14
256.4	-0.82938	0.341176	0.113484	0.36899	0.42088	0.214154	0.415018	23780	1066.3	20281.2	19210.6	12930.6	6145.59
256.5	-0.731125	0.189698	0.019767	0.265697	0.317037	0.141841	0.172739	13222	185.731	14603.8	14470.8	8564.36	2557.92
256.6	-0.691823	0.145589	0.005368	0.193256	0.199935	0.097446	0.09806	10147.6	50.4377	10622.1	9125.83	5883.79	1452.07
256.7	-0.661471	0.119739	-0.023738	0.105043	0.171692	0.120513	-0.002826	8345.81	-223.042	5773.58	7836.71	7276.57	-41.8474
256.8	-0.605654	0.045807	-0.070001	0.054738	0.155142	0.099135	-0.042922	3192.75	-657.729	3008.62	7081.3	5985.77	-635.589
256.9	-0.590786	-0.062074	-0.118275	0.087487	0.161222	0.072498	0.009593	-4326.56	-1111.31	4808.64	7358.82	4377.43	142.053
257	-0.542706	-0.114035	-0.119585	0.029299	0.176955	0.022223	-0.078235	-7948.24	-1123.62	1610.39	8076.93	1341.82	-1158.5
257.1	-0.469691	-0.234626	-0.210562	-0.074609	0.088064	-0.067466	-0.143814	-16353.4	-1978.44	-4100.81	4019.59	-4073.6	-2129.6
257.2	-0.455836	-0.235058	-0.242815	-0.01906	0.015062	-0.031423	-0.155012	-16383.5	-2281.49	-1047.61	687.49	-1897.32	-2295.42
257.3	-0.553908	-0.218994	-0.194951	0.086589	0.10661	0.085149	-0.092818	-15263.9	-1831.76	4759.28	4866.11	5141.3	-1374.45
257.4	-0.542265	-0.219154	-0.270942	0.06465	0.127544	0.073093	-0.030381	-15275	-2545.77	3553.42	5821.62	4413.36	-449.882
257.5	-0.603162	-0.225557	-0.255063	0.09446	0.200168	0.124049	0.010103	-15721.3	-2396.57	5191.9	9136.47	7490.08	149.605
257.6	-0.672865	-0.161193	-0.146423	0.20072	0.278057	0.183378	0.052725	-11235.2	-1375.79	11032.4	12691.6	11072.4	780.752
257.7	-0.678427	-0.199208	-0.107733	0.183844	0.330848	0.071366	0.07804	-13884.8	-1012.26	10104.8	15101.2	4309.08	1155.62
257.8	-0.665553	-0.199657	-0.106968	0.145163	0.398197	0.074206	0.102542	-13916.1	-1005.07	7978.74	18175.3	4480.56	1518.44
257.9	-0.684519	-0.183179	-0.090463	0.22821	0.379548	0.114373	0.073567	-12767.6	-849.99	12543.3	17324.1	6905.84	1089.38
258	-0.662605	-0.138203	-0.068423	0.305336	0.398674	0.08743	0.005046	-9632.75	-642.903	16782.5	18197.1	5279.02	74.7212
258.1	-0.719078	-0.057777	-0.026605	0.369034	0.528669	0.17461	0.116215	-4027.06	-249.981	20283.6	24130.6	10543	1720.91
258.2	-0.742191	-0.041985	0.076826	0.384866	0.544096	0.239016	0.133619	-2926.35	721.857	21153.8	24834.7	14431.8	1978.63
258.3	-0.738357	0.057634	0.184563	0.412457	0.5236	0.262077	0.140578	4017.09	1734.15	22670.3	23899.2	15824.2	2081.68
258.4	-0.700108	0.017107	0.180437	0.342224	0.435404	0.185885	0.178827	1192.36	1695.39	18810	19873.6	11223.7	2648.07
258.5	-0.693626	0.027264	0.11398	0.357087	0.384891	0.224013	0.288819	1900.3	1070.96	19626.9	17568	13525.9	4276.83
258.6	-0.700262	0.062956	0.092719	0.340015	0.414516	0.24396	0.19258	4388.03	871.188	18688.6	18920.2	14730.3	2851.72
258.7	-0.656481	0.096207	0.043006	0.303608	0.361473	0.219623	0.169837	6705.63	404.084	16687.5	16499.1	13260.8	2514.95
258.8	-0.778433	0.190178	0.196627	0.294053	0.447198	0.403036	0.331384	13255.4	1847.51	16162.3	20411.9	24335.3	4907.13
258.9	-0.739407	0.105198	0.156299	0.262183	0.371144	0.336432	0.237373	7332.3	1468.59	14410.6	16940.5	20313.8	3515.02
259	-0.738632	0.147954	0.102244	0.291013	0.427042	0.314124	0.203187	10312.4	960.685	15995.2	19491.9	18966.8	3008.79
259.1	-0.640292	-0.010467	-0.03447	0.198879	0.277534	0.194066	0.08699	-729.55	-323.88	10931.2	12667.8	11717.7	1288.15
259.2	-0.626569	0.048654	0.003957	0.173447	0.316732	0.150547	0.066348	3391.18	37.18	9533.34	14456.9	9090.03	982.481
259.3	-0.649109	0.043619	0.118368	0.206035	0.337818	0.233665	-0.026664	3040.24	1112.19	11324.5	15419.4	14108.7	-394.841
259.4	-0.591341	0.00012	0.016255	0.162086	0.233977	0.164428	-0.062714	8.364	152.732	8908.89	10679.6	9928.16	-928.669
259.5	-0.588348	-0.078139	0.000238	0.183768	0.20286	0.116489	-0.07373	-5446.29	2.23625	10100.6	9259.34	7033.61	-1091.79
259.6	-0.529189	-0.135737	-0.038375	0.146826	0.067038	0.104599	-0.167406	-9460.87	-360.571	8070.14	3059.88	6315.69	-2478.95
259.7	-0.478501	-0.212675	-0.145156	0.060914	0.069988	0.028019	-0.227542	-14823.4	-1363.89	3348.08	3194.53	1691.79	-3369.44
259.8	-0.433473	-0.201043	-0.134056	-0.046746	-0.052441	0.001759	-0.320134	-14012.7	-1259.59	-2569.35	-2393.62	106.208	-4740.54
259.9	-0.555114	-0.115144	0.013168	0.101252	0.041149	0.171679	-0.128951	-8025.54	123.727	5565.21	1878.2	10366	-1909.51
260	-0.518884	-0.125219	0.00262	0.109522	0.069624	0.141668	-0.238413	-8727.76	24.6175	6019.77	3177.92	8553.91	-3530.42
