# Supplementary material for: Dissecting the phase separation and oligomerization activities of the carboxysome positioning protein McdB
Source: eLife. 2023 Sep 5;12:e81362. doi: 10.7554/eLife.81362 (PMC10554743; doi:10.7554/eLife.81362)
Supplement: Figure 2—source data 2. [file elife-81362-fig2-data2.xlsx]

## Sheet: SEC-MALS
t(min)	vol(ml)	FL_UV	FL_MW	NTD.CC_UV	NTD.CC_MW	CC_UV	CC_MW	CC.CTD_UV	CC.CTD_MW
0.01275	0.006375	0.000290311		-5.91686e-05		8.18706e-06		1.84765e-05
0.0295846	0.0147923	0.000304384		-6.34018e-05		6.78231e-06		1.86327e-05
0.0464191	0.0232096	0.00031762		-6.73485e-05		4.96608e-06		1.87934e-05
0.0632537	0.0316268	0.000330111		-7.09413e-05		2.74633e-06		1.90052e-05
0.0800882	0.0400441	0.000341964		-7.41102e-05		1.42029e-07		1.93125e-05
0.0969228	0.0484614	0.0003533		-7.67785e-05		-2.81851e-06		1.97536e-05
0.113757	0.0568787	0.00036424		-7.88563e-05		-6.09952e-06		2.03577e-05
0.130592	0.0652959	0.000374891		-8.02324e-05		-9.65952e-06		2.11423e-05
0.147426	0.0737132	0.000385345		-8.07656e-05		-1.34524e-05		2.21126e-05
0.164261	0.0821305	0.000395665		-8.02756e-05		-1.74279e-05		2.32615e-05
0.181096	0.0905478	0.000405881		-7.85372e-05		-2.1532e-05		2.45716e-05
0.19793	0.0989651	0.000415988		-7.52784e-05		-2.57061e-05		2.60181e-05
0.214765	0.107382	0.000425949		-7.01852e-05		-2.98873e-05		2.75722e-05
0.231599	0.1158	0.000435697		-6.29144e-05		-3.40079e-05		2.92047e-05
0.248434	0.124217	0.000445147		-5.3114e-05		-3.79966e-05		3.08889e-05
0.265268	0.132634	0.000454205		-4.04513e-05		-4.17806e-05		3.26026e-05
0.282103	0.141051	0.000462777		-2.46455e-05		-4.52879e-05		3.43285e-05
0.298937	0.149469	0.000470782		-5.50112e-06		-4.84518e-05		3.60532e-05
0.315772	0.157886	0.000478157		1.70603e-05		-5.12139e-05		3.77652e-05
0.332607	0.166303	0.000484867		4.29765e-05		-5.35288e-05		3.94522e-05
0.349441	0.174721	0.000490901		7.20299e-05		-5.53655e-05		4.10984e-05
0.366276	0.183138	0.000496272		0.000103845		-5.671e-05		4.26816e-05
0.38311	0.191555	0.000501014		0.000137895		-5.75644e-05		4.41721e-05
0.399945	0.199972	0.000505167		0.000173526		-5.7946e-05		4.55323e-05
0.416779	0.20839	0.000508778		0.000209982		-5.78847e-05		4.67172e-05
0.433614	0.216807	0.000511885		0.00024644		-5.74196e-05		4.76772e-05
0.450448	0.225224	0.000514517		0.00028205		-5.65957e-05		4.83612e-05
0.467283	0.233642	0.000516684		0.000315964		-5.54605e-05		4.87202e-05
0.484118	0.242059	0.00051838		0.00034738		-5.40624e-05		4.87119e-05
0.500952	0.250476	0.000519582		0.000375565		-5.24486e-05		4.83053e-05
0.517787	0.258893	0.000520254		0.00039989		-5.06654e-05		4.74837e-05
0.534621	0.267311	0.000520351		0.000419852		-4.87579e-05		4.62483e-05
0.551456	0.275728	0.000519821		0.000435095		-4.67719e-05		4.4619e-05
0.56829	0.284145	0.000518616		0.000445422		-4.47538e-05		4.26346e-05
0.585125	0.292562	0.000516692		0.000450803		-4.2752e-05		4.03512e-05
0.601959	0.30098	0.000514014		0.000451365		-4.08169e-05		3.78384e-05
0.618794	0.309397	0.00051056		0.000447384		-3.89998e-05		3.51753e-05
0.635629	0.317814	0.000506323		0.000439265		-3.73523e-05		3.24447e-05
0.652463	0.326232	0.000501311		0.000427505		-3.59229e-05		2.9727e-05
0.669298	0.334649	0.000495553		0.000412669		-3.47549e-05		2.70948e-05
0.686132	0.343066	0.000489096		0.000395346		-3.38827e-05		2.46077e-05
0.702967	0.351483	0.00048201		0.000376124		-3.33285e-05		2.23095e-05
0.719801	0.359901	0.000474385		0.000355561		-3.30997e-05		2.02261e-05
0.736636	0.368318	0.000466335		0.000334166		-3.31868e-05		1.83655e-05
0.75347	0.376735	0.000457995		0.000312383		-3.35634e-05		1.67202e-05
0.770305	0.385153	0.000449517		0.000290589		-3.41866e-05		1.52693e-05
0.78714	0.39357	0.000441064		0.00026909		-3.50005e-05		1.39834e-05
0.803974	0.401987	0.000432802		0.000248128		-3.5939e-05		1.28272e-05
0.820809	0.410404	0.00042489		0.000227882		-3.69312e-05		1.17644e-05
0.837643	0.418822	0.00041747		0.00020848		-3.79055e-05		1.07601e-05
0.854478	0.427239	0.000410654		0.000190007		-3.87949e-05		9.7838e-06
0.871312	0.435656	0.000404515		0.000172508		-3.95405e-05		8.81098e-06
0.888147	0.444073	0.000399081		0.000156		-4.00949e-05		7.82397e-06
0.904981	0.452491	0.000394333		0.000140476		-4.04237e-05		6.81253e-06
0.921816	0.460908	0.000390204		0.000125912		-4.05064e-05		5.7736e-06
0.938651	0.469325	0.000386584		0.000112271		-4.03358e-05		4.71068e-06
0.955485	0.477743	0.000383334		9.95114e-05		-3.99168e-05		3.63308e-06
0.97232	0.48616	0.000380296		8.75846e-05		-3.9264e-05		2.55474e-06
0.989154	0.494577	0.000377308		7.64437e-05		-3.83999e-05		1.49298e-06
1.00599	0.502994	0.000374221		6.60426e-05		-3.73517e-05		4.66981e-07
1.02282	0.511412	0.00037091		5.63375e-05		-3.61488e-05		-5.03756e-07
1.03966	0.519829	0.000367281		4.72863e-05		-3.48207e-05		-1.40091e-06
1.05649	0.528246	0.000363282		3.88473e-05		-3.33946e-05		-2.20861e-06
1.07333	0.536664	0.0003589		3.09773e-05		-3.18937e-05		-2.91437e-06
1.09016	0.545081	0.00035416		2.36303e-05		-3.03363e-05		-3.50988e-06
1.107	0.553498	0.000349118		1.67562e-05		-2.87353e-05		-3.99128e-06
1.12383	0.561915	0.000343854		1.03004e-05		-2.70984e-05		-4.35892e-06
1.14067	0.570333	0.000338464		4.20504e-06		-2.54287e-05		-4.61701e-06
1.1575	0.57875	0.000333053		-1.58902e-06		-2.37254e-05		-4.77326e-06
1.17433	0.587167	0.000327727		-7.13941e-06		-2.1985e-05		-4.83852e-06
1.19117	0.595584	0.000322592		-1.2499e-05		-2.02018e-05		-4.82651e-06
1.208	0.604002	0.000317747		-1.77131e-05		-1.83696e-05		-4.75324e-06
1.22484	0.612419	0.000313284		-2.28174e-05		-1.64818e-05		-4.6365e-06
1.24167	0.620836	0.000309285		-2.78374e-05		-1.45322e-05		-4.49506e-06
1.25851	0.629254	0.000305823		-3.27891e-05		-1.25159e-05		-4.3479e-06
1.27534	0.637671	0.000302951		-3.76813e-05		-1.04295e-05		-4.2131e-06
1.29218	0.646088	0.000300711		-4.25186e-05		-8.27206e-06		-4.10653e-06
1.30901	0.654505	0.00029912		-4.73045e-05		-6.0453e-06		-4.04081e-06
1.32585	0.662923	0.000298178		-5.2045e-05		-3.75458e-06		-4.02448e-06
1.34268	0.67134	0.000297859		-5.67506e-05		-1.40914e-06		-4.06158e-06
1.35951	0.679757	0.000298117		-6.14373e-05		9.77722e-07		-4.15166e-06
1.37635	0.688175	0.000298885		-6.61265e-05		3.3889e-06		-4.29045e-06
1.39318	0.696592	0.000300079		-7.08432e-05		5.80398e-06		-4.47092e-06
1.41002	0.705009	0.000301596		-7.56127e-05		8.20004e-06		-4.68448e-06
1.42685	0.713426	0.000303325		-8.04565e-05		1.05524e-05		-4.9224e-06
1.44369	0.721844	0.000305143		-8.53879e-05		1.28355e-05		-5.1774e-06
1.46052	0.730261	0.000306923		-9.0407e-05		1.50234e-05		-5.44509e-06
1.47736	0.738678	0.000308536		-9.54961e-05		1.7091e-05		-5.72523e-06
1.49419	0.747095	0.000309856		-0.000100617		1.90141e-05		-6.02246e-06
1.51103	0.755513	0.000310763		-0.000105707		2.07707e-05		-6.34628e-06
1.52786	0.76393	0.000311151		-0.000110682		2.23412e-05		-6.7104e-06
1.54469	0.772347	0.000310934		-0.000115436		2.37095e-05		-7.13149e-06
1.56153	0.780765	0.000310048		-0.000119849		2.48641e-05		-7.62756e-06
1.57836	0.789182	0.000308459		-0.000123789		2.57983e-05		-8.21625e-06
1.5952	0.797599	0.000306166		-0.000127125		2.65113e-05		-8.91335e-06
1.61203	0.806016	0.000303199		-0.000129735		2.70086e-05		-9.73189e-06
1.62887	0.814434	0.000299614		-0.000131518		2.73015e-05		-1.06818e-05
1.6457	0.822851	0.000295493		-0.000132401		2.74065e-05		-1.17706e-05
1.66254	0.831268	0.000290931		-0.000132344		2.73436e-05		-1.30035e-05
1.67937	0.839686	0.000286028		-0.000131351		2.71344e-05		-1.43853e-05
1.69621	0.848103	0.000280883		-0.000129466		2.67999e-05		-1.59209e-05
1.71304	0.85652	0.000275586		-0.000126774		2.6358e-05		-1.7616e-05
1.72987	0.864937	0.000270212		-0.000123393		2.58211e-05		-1.94766e-05
1.74671	0.873355	0.00026482		-0.000119466		2.51936e-05		-2.15082e-05
1.76354	0.881772	0.000259457		-0.000115155		2.44709e-05		-2.37147e-05
1.78038	0.890189	0.000254153		-0.000110623		2.36386e-05		-2.60965e-05
1.79721	0.898606	0.00024893		-0.000106032		2.26723e-05		-2.86495e-05
1.81405	0.907024	0.000243802		-0.000101527		2.15392e-05		-3.13633e-05
1.83088	0.915441	0.000238777		-9.72318e-05		2.02005e-05		-3.42207e-05
1.84772	0.923858	0.00023386		-9.32457e-05		1.86147e-05		-3.71975e-05
1.86455	0.932276	0.000229052		-8.96374e-05		1.6742e-05		-4.02631e-05
1.88139	0.940693	0.000224349		-8.64475e-05		1.45491e-05		-4.33813e-05
1.89822	0.94911	0.000219747		-8.36898e-05		1.20142e-05		-4.65119e-05
1.91505	0.957527	0.000215236		-8.13546e-05		9.13069e-06		-4.96128e-05
1.93189	0.965945	0.000210807		-7.94125e-05		5.91068e-06		-5.26419e-05
1.94872	0.974362	0.000206447		-7.78201e-05		2.38565e-06		-5.55602e-05
1.96556	0.982779	0.000202143		-7.65244e-05		-1.39432e-06		-5.83336e-05
1.98239	0.991197	0.000197883		-7.54684e-05		-5.36349e-06		-6.09359e-05
1.99923	0.999614	0.000193652		-7.4596e-05		-9.44522e-06		-6.33497e-05
2.01606	1.00803	0.000189434		-7.38564e-05		-1.35578e-05		-6.55681e-05
2.0329	1.01645	0.000185214		-7.32077e-05		-1.76205e-05		-6.75937e-05
2.04973	1.02487	0.000180967		-7.26197e-05		-2.156e-05		-6.94384e-05
2.06657	1.03328	0.000176647		-7.20743e-05		-2.5315e-05		-7.11241e-05
2.0834	1.0417	0.000172244		-7.15668e-05		-2.88372e-05		-7.26685e-05
2.10023	1.05012	0.000167721		-7.1104e-05		-3.20944e-05		-7.40962e-05
2.11707	1.05853	0.000163042		-7.07025e-05		-3.50697e-05		-7.54291e-05
2.1339	1.06695	0.000158175		-7.03865e-05		-3.77586e-05		-7.6684e-05
2.15074	1.07537	0.000153094		-7.01844e-05		-4.01642e-05		-7.78745e-05
2.16757	1.08379	0.000147792		-7.0127e-05		-4.22958e-05		-7.90077e-05
2.18441	1.0922	0.00014228		-7.02452e-05		-4.41636e-05		-8.0086e-05
2.20124	1.10062	0.000136592		-7.05677e-05		-4.57781e-05		-8.11069e-05
2.21808	1.10904	0.000130783		-7.11212e-05		-4.71474e-05		-8.20655e-05
2.23491	1.11746	0.00012493		-7.1929e-05		-4.82765e-05		-8.29564e-05
2.25175	1.12587	0.000119131		-7.30106e-05		-4.91668e-05		-8.3775e-05
2.26858	1.13429	0.000113494		-7.43815e-05		-4.98179e-05		-8.45163e-05
2.28542	1.14271	0.000108131		-7.60499e-05		-5.02271e-05		-8.51751e-05
2.30225	1.15112	0.000103149		-7.80223e-05		-5.03937e-05		-8.5749e-05
2.31908	1.15954	9.86421e-05		-8.02976e-05		-5.03187e-05		-8.62305e-05
2.33592	1.16796	9.46862e-05		-8.28661e-05		-5.00049e-05		-8.66074e-05
2.35275	1.17638	9.13301e-05		-8.57106e-05		-4.9457e-05		-8.6864e-05
2.36959	1.18479	8.85934e-05		-8.88041e-05		-4.86826e-05		-8.69793e-05
2.38642	1.19321	8.64671e-05		-9.21121e-05		-4.7693e-05		-8.69281e-05
2.40326	1.20163	8.49116e-05		-9.55926e-05		-4.64976e-05		-8.66843e-05
2.42009	1.21005	8.38628e-05		-9.91972e-05		-4.51071e-05		-8.62181e-05
2.43693	1.21846	8.3248e-05		-0.000102873		-4.35322e-05		-8.55029e-05
2.45376	1.22688	8.29807e-05		-0.000106562		-4.17841e-05		-8.45177e-05
2.4706	1.2353	8.29717e-05		-0.000110207		-3.98734e-05		-8.325e-05
2.48743	1.24371	8.31337e-05		-0.000113752		-3.78139e-05		-8.16973e-05
2.50426	1.25213	8.33957e-05		-0.000117139		-3.5623e-05		-7.98682e-05
2.5211	1.26055	8.36986e-05		-0.000120316		-3.33218e-05		-7.77841e-05
2.53793	1.26897	8.39998e-05		-0.000123237		-3.09353e-05		-7.54754e-05
2.55477	1.27738	8.42745e-05		-0.000125865		-2.84947e-05		-7.29805e-05
2.5716	1.2858	8.45146e-05		-0.00012817		-2.60367e-05		-7.03439e-05
2.58844	1.29422	8.47258e-05		-0.000130146		-2.36024e-05		-6.7612e-05
2.60527	1.30264	8.49251e-05		-0.000131784		-2.12363e-05		-6.48324e-05
2.62211	1.31105	8.51372e-05		-0.000133071		-1.89798e-05		-6.20498e-05
2.63894	1.31947	8.53876e-05		-0.000134023		-1.68688e-05		-5.93049e-05
2.65578	1.32789	8.57039e-05		-0.000134664		-1.49325e-05		-5.6634e-05
2.67261	1.3363	8.61085e-05		-0.000135027		-1.31889e-05		-5.40676e-05
2.68944	1.34472	8.66129e-05		-0.00013515		-1.16446e-05		-5.16269e-05
2.70628	1.35314	8.72129e-05		-0.000135075		-1.02932e-05		-4.93254e-05
2.72311	1.36156	8.78899e-05		-0.000134843		-9.11629e-06		-4.71683e-05
2.73995	1.36997	8.86007e-05		-0.00013449		-8.08939e-06		-4.51508e-05
2.75678	1.37839	8.92924e-05		-0.000134047		-7.18245e-06		-4.32616e-05
2.77362	1.38681	8.99001e-05		-0.000133535		-6.36187e-06		-4.14803e-05
2.79045	1.39523	9.0353e-05		-0.000132968		-5.59851e-06		-3.97809e-05
2.80729	1.40364	9.05817e-05		-0.00013235		-4.86986e-06		-3.81341e-05
2.82412	1.41206	9.05278e-05		-0.000131676		-4.16218e-06		-3.65102e-05
2.84096	1.42048	9.01452e-05		-0.00013093		-3.47152e-06		-3.48808e-05
2.85779	1.42889	8.94112e-05		-0.00013011		-2.80423e-06		-3.3225e-05
2.87462	1.43731	8.83299e-05		-0.00012923		-2.17562e-06		-3.1527e-05
2.89146	1.44573	8.69276e-05		-0.000128294		-1.60684e-06		-2.97778e-05
2.90829	1.45415	8.52554e-05		-0.000127315		-1.11842e-06		-2.79754e-05
2.92513	1.46256	8.33864e-05		-0.000126317		-7.30725e-07		-2.61235e-05
2.94196	1.47098	8.14043e-05		-0.000125335		-4.58962e-07		-2.42286e-05
2.9588	1.4794	7.93965e-05		-0.000124409		-3.09475e-07		-2.22998e-05
2.97563	1.48782	7.7444e-05		-0.000123582		-2.81767e-07		-2.03475e-05
2.99247	1.49623	7.56103e-05		-0.000122894		-3.64224e-07		-1.83832e-05
3.0093	1.50465	7.39344e-05		-0.000122378		-5.35956e-07		-1.64197e-05
3.02614	1.51307	7.24246e-05		-0.000122052		-7.70029e-07		-1.44692e-05
3.04297	1.52149	7.10547e-05		-0.000121919		-1.03383e-06		-1.2545e-05
3.0598	1.5299	6.9767e-05		-0.000121967		-1.29269e-06		-1.06606e-05
3.07664	1.53832	6.84667e-05		-0.000122167		-1.51334e-06		-8.82918e-06
3.09347	1.54674	6.70408e-05		-0.000122474		-1.6652e-06		-7.06271e-06
3.11031	1.55515	6.53634e-05		-0.000122834		-1.72262e-06		-5.36925e-06
3.12714	1.56357	6.33035e-05		-0.000123193		-1.66493e-06		-3.75652e-06
3.14398	1.57199	6.07359e-05		-0.000123495		-1.47916e-06		-2.22513e-06
3.16081	1.58041	5.75473e-05		-0.000123697		-1.15604e-06		-7.70616e-07
3.17765	1.58882	5.36529e-05		-0.000123768		-6.91811e-07		6.17138e-07
3.19448	1.59724	4.89976e-05		-0.00012369		-8.67266e-08		1.95423e-06
3.21132	1.60566	4.3559e-05		-0.000123462		6.56193e-07		3.2611e-06
3.22815	1.61408	3.73473e-05		-0.000123096		1.52947e-06		4.56187e-06
3.24498	1.62249	3.04044e-05		-0.000122615		2.52553e-06		5.88177e-06
3.26182	1.63091	2.28047e-05		-0.00012205		3.63421e-06		7.24718e-06
3.27865	1.63933	1.46464e-05		-0.000121433		4.84278e-06		8.68153e-06
3.29549	1.64774	6.04905e-06		-0.000120793		6.1363e-06		1.02033e-05
3.31232	1.65616	-2.8584e-06		-0.000120154		7.49822e-06		1.1828e-05
3.32916	1.66458	-1.19472e-05		-0.000119532		8.91132e-06		1.35669e-05
3.34599	1.673	-2.10945e-05		-0.000118935		1.03589e-05		1.54235e-05
3.36283	1.68141	-3.01844e-05		-0.000118363		1.18261e-05		1.73947e-05
3.37966	1.68983	-3.9118e-05		-0.000117812		1.33012e-05		1.94698e-05
3.3965	1.69825	-4.78186e-05		-0.000117271		1.47771e-05		2.16344e-05
3.41333	1.70667	-5.62364e-05		-0.000116729		1.62504e-05		2.38699e-05
3.43016	1.71508	-6.43467e-05		-0.000116176		1.77225e-05		2.61542e-05
3.447	1.7235	-7.21503e-05		-0.000115599		1.91979e-05		2.84631e-05
3.46383	1.73192	-7.96666e-05		-0.000114987		2.06835e-05		3.07692e-05
3.48067	1.74033	-8.69298e-05		-0.000114327		2.21845e-05		3.30487e-05
3.4975	1.74875	-9.39812e-05		-0.000113602		2.37035e-05		3.52772e-05
3.51434	1.75717	-0.000100864		-0.000112791		2.5238e-05		3.74304e-05
3.53117	1.76559	-0.000107614		-0.000111865		2.67785e-05		3.94852e-05
3.54801	1.774	-0.000114256		-0.000110794		2.83091e-05		4.14204e-05
3.56484	1.78242	-0.000120795		-0.000109542		2.98075e-05		4.32158e-05
3.58168	1.79084	-0.000127222		-0.000108072		3.12471e-05		4.48513e-05
3.59851	1.79926	-0.000133512		-0.000106352		3.25983e-05		4.63114e-05
3.61534	1.80767	-0.000139631		-0.000104356		3.383e-05		4.75852e-05
3.63218	1.81609	-0.000145535		-0.000102069		3.49124e-05		4.86641e-05
3.64901	1.82451	-0.000151177		-9.94857e-05		3.58172e-05		4.95434e-05
3.66585	1.83292	-0.000156511		-9.66141e-05		3.65225e-05		5.02207e-05
3.68268	1.84134	-0.000161499		-9.3474e-05		3.70114e-05		5.06954e-05
3.69952	1.84976	-0.000166106		-9.00962e-05		3.72736e-05		5.09679e-05
3.71635	1.85818	-0.000170311		-8.65173e-05		3.73063e-05		5.10395e-05
3.73319	1.86659	-0.000174093		-8.27763e-05		3.71133e-05		5.09108e-05
3.75002	1.87501	-0.000177431		-7.89113e-05		3.67048e-05		5.05818e-05
3.76686	1.88343	-0.000180305		-7.49549e-05		3.60979e-05		5.00517e-05
3.78369	1.89185	-0.000182692		-7.09297e-05		3.53158e-05		4.93206e-05
3.80053	1.90026	-0.000184564		-6.6846e-05		3.43866e-05		4.83898e-05
3.81736	1.90868	-0.00018589		-6.27043e-05		3.33418e-05		4.72631e-05
3.83419	1.9171	-0.000186634		-5.84896e-05		3.22151e-05		4.59482e-05
3.85103	1.92551	-0.000186756		-5.41773e-05		3.10399e-05		4.44566e-05
3.86786	1.93393	-0.000186227		-4.97357e-05		2.98483e-05		4.28055e-05
3.8847	1.94235	-0.000185018		-4.51315e-05		2.86702e-05		4.10134e-05
3.90153	1.95077	-0.000183108		-4.03316e-05		2.75327e-05		3.91016e-05
3.91837	1.95918	-0.000180497		-3.53114e-05		2.64582e-05		3.70951e-05
3.9352	1.9676	-0.000177207		-3.00565e-05		2.5463e-05		3.502e-05
3.95204	1.97602	-0.000173274		-2.45683e-05		2.45601e-05		3.29011e-05
3.96887	1.98444	-0.000168762		-1.8867e-05		2.37584e-05		3.07618e-05
3.98571	1.99285	-0.00016376		-1.29884e-05		2.30619e-05		2.86235e-05
4.00254	2.00127	-0.000158379		-6.98774e-06		2.24704e-05		2.65071e-05
4.01937	2.00969	-0.000152744		-9.35048e-07		2.19781e-05		2.44319e-05
4.03621	2.0181	-0.000146989		5.08822e-06		2.15758e-05		2.24171e-05
4.05304	2.02652	-0.000141256		1.09927e-05		2.125e-05		2.04809e-05
4.06988	2.03494	-0.000135669		1.66885e-05		2.09835e-05		1.86428e-05
4.08671	2.04336	-0.000130339		2.20902e-05		2.07552e-05		1.69229e-05
4.10355	2.05177	-0.000125352		2.71211e-05		2.05447e-05		1.53416e-05
4.12038	2.06019	-0.00012077		3.17212e-05		2.03305e-05		1.39179e-05
4.13722	2.06861	-0.00011663		3.58485e-05		2.00932e-05		1.26689e-05
4.15405	2.07703	-0.000112945		3.94796e-05		1.98167e-05		1.16058e-05
4.17089	2.08544	-0.000109711		4.2609e-05		1.94889e-05		1.07347e-05
4.18772	2.09386	-0.000106903		4.52461e-05		1.91049e-05		1.00535e-05
4.20455	2.10228	-0.000104488		4.74121e-05		1.86623e-05		9.55045e-06
4.22139	2.11069	-0.000102427		4.91347e-05		1.81653e-05		9.20291e-06
4.23822	2.11911	-0.000100673		5.04436e-05		1.7619e-05		8.97752e-06
4.25506	2.12753	-9.91836e-05		5.13688e-05		1.70303e-05		8.83131e-06
4.27189	2.13595	-9.79076e-05		5.19358e-05		1.64081e-05		8.71303e-06
4.28873	2.14436	-9.67893e-05		5.21689e-05		1.5761e-05		8.56614e-06
4.30556	2.15278	-9.57597e-05		5.20872e-05		1.50964e-05		8.3326e-06
4.3224	2.1612	-9.47484e-05		5.17083e-05		1.44189e-05		7.95876e-06
4.33923	2.16962	-9.36806e-05		5.10496e-05		1.37354e-05		7.39854e-06
4.35607	2.17803	-9.24816e-05		5.01326e-05		1.30515e-05		6.61632e-06
4.3729	2.18645	-9.10795e-05		4.89849e-05		1.23723e-05		5.5909e-06
4.38973	2.19487	-8.94109e-05		4.76432e-05		1.17019e-05		4.31738e-06
4.40657	2.20328	-8.74273e-05		4.61547e-05		1.10433e-05		2.80811e-06
4.4234	2.2117	-8.50992e-05		4.45779e-05		1.03955e-05		1.08986e-06
4.44024	2.22012	-8.24231e-05		4.29834e-05		9.75273e-06		-7.96362e-07
4.45707	2.22854	-7.94206e-05		4.14452e-05		9.10507e-06		-2.79681e-06
4.47391	2.23695	-7.6143e-05		4.00447e-05		8.43633e-06		-4.85094e-06
4.49074	2.24537	-7.267e-05		3.88611e-05		7.7244e-06		-6.89463e-06
4.50758	2.25379	-6.91058e-05		3.79656e-05		6.94186e-06		-8.86396e-06
4.52441	2.26221	-6.55859e-05		3.74163e-05		6.05849e-06		-1.06991e-05
4.54125	2.27062	-6.22534e-05		3.72503e-05		5.04468e-06		-1.23478e-05
4.55808	2.27904	-5.92598e-05		3.74823e-05		3.87455e-06		-1.37681e-05
4.57491	2.28746	-5.67567e-05		3.81016e-05		2.53104e-06		-1.49287e-05
4.59175	2.29587	-5.48852e-05		3.90727e-05		1.00828e-06		-1.58102e-05
4.60858	2.30429	-5.37649e-05		4.03381e-05		-6.87467e-07		-1.64041e-05
4.62542	2.31271	-5.3488e-05		4.18217e-05		-2.53579e-06		-1.67126e-05
4.64225	2.32113	-5.41122e-05		4.34379e-05		-4.50224e-06		-1.67458e-05
4.65909	2.32954	-5.56527e-05		4.50984e-05		-6.5445e-06		-1.65206e-05
4.67592	2.33796	-5.80811e-05		4.67171e-05		-8.6112e-06		-1.60597e-05
4.69276	2.34638	-6.13257e-05		4.82197e-05		-1.06456e-05		-1.53889e-05
4.70959	2.3548	-6.52735e-05		4.95469e-05		-1.2594e-05		-1.45367e-05
4.72643	2.36321	-6.97797e-05		5.06577e-05		-1.44092e-05		-1.35326e-05
4.74326	2.37163	-7.46743e-05		5.15301e-05		-1.60537e-05		-1.24051e-05
4.76009	2.38005	-7.97708e-05		5.21615e-05		-1.75029e-05		-1.11834e-05
4.77693	2.38846	-8.48794e-05		5.25669e-05		-1.87454e-05		-9.89631e-06
4.79376	2.39688	-8.98254e-05		5.27742e-05		-1.97826e-05		-8.57215e-06
4.8106	2.4053	-9.44475e-05		5.28247e-05		-2.06281e-05		-7.2355e-06
4.82743	2.41372	-9.86103e-05		5.2767e-05		-2.12985e-05		-5.91079e-06
4.84427	2.42213	-0.000102219		5.26539e-05		-2.18156e-05		-4.62089e-06
4.8611	2.43055	-0.000105222		5.25375e-05		-2.21999e-05		-3.38893e-06
4.87794	2.43897	-0.000107614		5.24652e-05		-2.24682e-05		-2.23808e-06
4.89477	2.44739	-0.000109436		5.24784e-05		-2.26299e-05		-1.19326e-06
4.91161	2.4558	-0.000110772		5.26092e-05		-2.2688e-05		-2.81198e-07
4.92844	2.46422	-0.000111735		5.288e-05		-2.26375e-05		4.68805e-07
4.94527	2.47264	-0.000112461		5.32997e-05		-2.24682e-05		1.02479e-06
4.96211	2.48105	-0.0001131		5.38746e-05		-2.2166e-05		1.35307e-06
4.97894	2.48947	-0.00011379		5.45999e-05		-2.17166e-05		1.42152e-06
4.99578	2.49789	-0.000114655		5.54644e-05		-2.1108e-05		1.20016e-06
5.01261	2.50631	-0.000115795		5.64506e-05		-2.03351e-05		6.64696e-07
5.02945	2.51472	-0.000117281		5.75333e-05		-1.93987e-05		-2.01315e-07
5.04628	2.52314	-0.00011915		5.86838e-05		-1.83087e-05		-1.40532e-06
5.06312	2.53156	-0.000121408		5.98672e-05		-1.70833e-05		-2.94466e-06
5.07995	2.53998	-0.000124031		6.10434e-05		-1.57501e-05		-4.80526e-06
5.09679	2.54839	-0.00012697		6.21682e-05		-1.43409e-05		-6.96401e-06
5.11362	2.55681	-0.000130161		6.31942e-05		-1.28922e-05		-9.3912e-06
5.13046	2.56523	-0.000133523		6.4074e-05		-1.14436e-05		-1.20518e-05
5.14729	2.57364	-0.000136959		6.47629e-05		-1.00363e-05		-1.49075e-05
5.16412	2.58206	-0.000140368		6.52235e-05		-8.71117e-06		-1.79173e-05
5.18096	2.59048	-0.000143646		6.54283e-05		-7.50701e-06		-2.10427e-05
5.19779	2.5989	-0.000146688		6.53658e-05		-6.46365e-06		-2.42445e-05
5.21463	2.60731	-0.000149402		6.50401e-05		-5.61611e-06		-2.7486e-05
5.23146	2.61573	-0.000151708		6.44712e-05		-4.99573e-06		-3.07301e-05
5.2483	2.62415	-0.000153546		6.36938e-05		-4.62904e-06		-3.39373e-05
5.26513	2.63257	-0.000154878		6.27543e-05		-4.53579e-06		-3.70652e-05
5.28197	2.64098	-0.000155697		6.17062e-05		-4.72796e-06		-4.00702e-05
5.2988	2.6494	-0.000156024		6.06016e-05		-5.20751e-06		-4.29081e-05
5.31564	2.65782	-0.000155908		5.94854e-05		-5.96824e-06		-4.55352e-05
5.33247	2.66623	-0.000155421		5.83913e-05		-6.99181e-06		-4.79115e-05
5.3493	2.67465	-0.000154649		5.73386e-05		-8.24941e-06		-5.00032e-05
5.36614	2.68307	-0.000153687		5.63292e-05		-9.70115e-06		-5.17852e-05
5.38297	2.69149	-0.000152625		5.5349e-05		-1.13012e-05		-5.32433e-05
5.39981	2.6999	-0.000151547		5.43707e-05		-1.29987e-05		-5.43763e-05
5.41664	2.70832	-0.000150526		5.33579e-05		-1.47419e-05		-5.51957e-05
5.43348	2.71674	-0.000149623		5.22738e-05		-1.64805e-05		-5.57269e-05
5.45031	2.72516	-0.00014889		5.1087e-05		-1.81687e-05		-5.6003e-05
5.46715	2.73357	-0.000148374		4.97766e-05		-1.97684e-05		-5.60646e-05
5.48398	2.74199	-0.000148124		4.83366e-05		-2.12513e-05		-5.59562e-05
5.50082	2.75041	-0.000148189		4.67765e-05		-2.26004e-05		-5.57222e-05
5.51765	2.75882	-0.000148622		4.5125e-05		-2.38109e-05		-5.54044e-05
5.53448	2.76724	-0.000149479		4.34222e-05		-2.48888e-05		-5.50381e-05
5.55132	2.77566	-0.000150812		4.17165e-05		-2.58513e-05		-5.46533e-05
5.56815	2.78408	-0.000152666		4.00575e-05		-2.67225e-05		-5.42693e-05
5.58499	2.79249	-0.000155066		3.84906e-05		-2.7529e-05		-5.38938e-05
5.60182	2.80091	-0.000158007		3.70518e-05		-2.83002e-05		-5.35277e-05
5.61866	2.80933	-0.000161452		3.57618e-05		-2.90637e-05		-5.31641e-05
5.63549	2.81775	-0.000165328		3.46233e-05		-2.98448e-05		-5.27905e-05
5.65233	2.82616	-0.000169521		3.36266e-05		-3.06622e-05		-5.23902e-05
5.66916	2.83458	-0.000173889		3.27484e-05		-3.15282e-05		-5.19432e-05
5.686	2.843	-0.000178258		3.1958e-05		-3.24469e-05		-5.14288e-05
5.70283	2.85141	-0.000182447		3.12214e-05		-3.34155e-05		-5.08274e-05
5.71966	2.85983	-0.000186271		3.05087e-05		-3.44233e-05		-5.01218e-05
5.7365	2.86825	-0.00018956		2.97976e-05		-3.54535e-05		-4.92986e-05
5.75333	2.87667	-0.000192167		2.90786e-05		-3.64839e-05		-4.83491e-05
5.77017	2.88508	-0.000193986		2.83561e-05		-3.74847e-05		-4.72702e-05
5.787	2.8935	-0.000194958		2.76462e-05		-3.84224e-05		-4.60648e-05
5.80384	2.90192	-0.000195075		2.69759e-05		-3.92613e-05		-4.47422e-05
5.82067	2.91034	-0.000194382		2.63783e-05		-3.99643e-05		-4.33181e-05
5.83751	2.91875	-0.000192971		2.58857e-05		-4.04955e-05		-4.18095e-05
5.85434	2.92717	-0.000190976		2.55255e-05		-4.08221e-05		-4.0238e-05
5.87118	2.93559	-0.000188557		2.53169e-05		-4.09178e-05		-3.86256e-05
5.88801	2.94401	-0.000185897		2.52666e-05		-4.07641e-05		-3.69934e-05
5.90484	2.95242	-0.00018318		2.53655e-05		-4.03535e-05		-3.53598e-05
5.92168	2.96084	-0.000180573		2.55906e-05		-3.96914e-05		-3.37367e-05
5.93851	2.96926	-0.000178219		2.59047e-05		-3.87968e-05		-3.21293e-05
5.95535	2.97767	-0.000176224		2.6266e-05		-3.77034e-05		-3.05351e-05
5.97218	2.98609	-0.000174648		2.66275e-05		-3.64565e-05		-2.89431e-05
5.98902	2.99451	-0.000173503		2.69421e-05		-3.51106e-05		-2.73362e-05
6.00585	3.00293	-0.000172751		2.71704e-05		-3.37259e-05		-2.56874e-05
6.02269	3.01134	-0.000172315		2.72818e-05		-3.23622e-05		-2.39635e-05
6.03952	3.01976	-0.000172075		2.72562e-05		-3.10766e-05		-2.21267e-05
6.05636	3.02818	-0.00017188		2.70862e-05		-2.99161e-05		-2.01366e-05
6.07319	3.0366	-0.000171567		2.67757e-05		-2.89142e-05		-1.79539e-05
6.09002	3.04501	-0.000170966		2.63378e-05		-2.80899e-05		-1.55423e-05
6.10686	3.05343	-0.000169914		2.5793e-05		-2.74447e-05		-1.28735e-05
6.12369	3.06185	-0.000168268		2.51641e-05		-2.69653e-05		-9.93043e-06
6.14053	3.07026	-0.000165908		2.44748e-05		-2.66251e-05		-6.71011e-06
6.15736	3.07868	-0.000162748		2.37474e-05		-2.63888e-05		-3.22724e-06
6.1742	3.0871	-0.000158736		2.29975e-05		-2.62171e-05		4.87589e-07
6.19103	3.09552	-0.00015386		2.2234e-05		-2.60716e-05		4.38771e-06
6.20787	3.10393	-0.000148142		2.14583e-05		-2.59197e-05		8.41143e-06
6.2247	3.11235	-0.000141641		2.0667e-05		-2.57373e-05		1.24865e-05
6.24154	3.12077	-0.00013444		1.98525e-05		-2.5511e-05		1.6532e-05
6.25837	3.12919	-0.000126656		1.90073e-05		-2.52413e-05		2.04679e-05
6.2752	3.1376	-0.000118421		1.81305e-05		-2.49417e-05		2.4217e-05
6.29204	3.14602	-0.000109881		1.72286e-05		-2.46367e-05		2.77117e-05
6.30887	3.15444	-0.000101195		1.63177e-05		-2.43598e-05		3.08957e-05
6.32571	3.16285	-9.25208e-05		1.54246e-05		-2.41493e-05		3.37262e-05
6.34254	3.17127	-8.40126e-05		1.4589e-05		-2.40457e-05		3.61768e-05
6.35938	3.17969	-7.58133e-05		1.3859e-05		-2.40871e-05		3.82394e-05
6.37621	3.18811	-6.80485e-05		1.32921e-05		-2.43054e-05		3.99183e-05
6.39305	3.19652	-6.08208e-05		1.29526e-05		-2.47224e-05		4.12276e-05
6.40988	3.20494	-5.42046e-05		1.2906e-05		-2.53464e-05		4.21877e-05
6.42672	3.21336	-4.8247e-05		1.32164e-05		-2.61704e-05		4.2822e-05
6.44355	3.22178	-4.29667e-05		1.39445e-05		-2.71714e-05		4.31525e-05
6.46038	3.23019	-3.83507e-05		1.51445e-05		-2.83121e-05		4.3196e-05
6.47722	3.23861	-3.43673e-05		1.68596e-05		-2.95428e-05		4.29667e-05
6.49405	3.24703	-3.0966e-05		1.91227e-05		-3.08061e-05		4.24754e-05
6.51089	3.25544	-2.80884e-05		2.19534e-05		-3.20399e-05		4.17303e-05
6.52772	3.26386	-2.56743e-05		2.53562e-05		-3.31828e-05		4.07405e-05
6.54456	3.27228	-2.36629e-05		2.93203e-05		-3.41786e-05		3.95188e-05
6.56139	3.2807	-2.20004e-05		3.38184e-05		-3.49803e-05		3.80864e-05
6.57823	3.28911	-2.06429e-05		3.88077e-05		-3.55526e-05		3.64738e-05
6.59506	3.29753	-1.95598e-05		4.42308e-05		-3.58727e-05		3.47223e-05
6.6119	3.30595	-1.87313e-05		5.00184e-05		-3.59304e-05		3.28812e-05
6.62873	3.31437	-1.81446e-05		5.60904e-05		-3.57257e-05		3.10072e-05
6.64557	3.32278	-1.77911e-05		6.23611e-05		-3.5267e-05		2.91581e-05
6.6624	3.3312	-1.76625e-05		6.87431e-05		-3.4567e-05		2.73933e-05
6.67923	3.33962	-1.77454e-05		7.51508e-05		-3.36436e-05		2.57674e-05
6.69607	3.34803	-1.80165e-05		8.15042e-05		-3.25112e-05		2.43261e-05
6.7129	3.35645	-1.84481e-05		8.77335e-05		-3.11795e-05		2.31039e-05
6.72974	3.36487	-1.90021e-05		9.37809e-05		-2.96552e-05		2.21208e-05
6.74657	3.37329	-1.963e-05		9.96023e-05		-2.79395e-05		2.13826e-05
6.76341	3.3817	-2.02872e-05		0.000105168		-2.60319e-05		2.08817e-05
6.78024	3.39012	-2.09355e-05		0.000110463		-2.39304e-05		2.05962e-05
6.79708	3.39854	-2.15505e-05		0.000115483		-2.1633e-05		2.04949e-05
6.81391	3.40696	-2.21246e-05		0.000120233		-1.91421e-05		2.05379e-05
6.83075	3.41537	-2.26719e-05		0.000124729		-1.64678e-05		2.06805e-05
6.84758	3.42379	-2.32209e-05		0.000128994		-1.36286e-05		2.08751e-05
6.86441	3.43221	-2.38134e-05		0.000133057		-1.06516e-05		2.10744e-05
6.88125	3.44062	-2.45026e-05		0.000136944		-7.57772e-06		2.1234e-05
6.89808	3.44904	-2.53446e-05		0.000140685		-4.45348e-06		2.13146e-05
6.91492	3.45746	-2.63899e-05		0.000144305		-1.32907e-06		2.12843e-05
6.93175	3.46588	-2.76866e-05		0.000147826		1.74565e-06		2.11209e-05
6.94859	3.47429	-2.92675e-05		0.000151259		4.72353e-06		2.08129e-05
6.96542	3.48271	-3.115e-05		0.000154612		7.56467e-06		2.0358e-05
6.98226	3.49113	-3.3335e-05		0.000157881		1.02383e-05		1.97646e-05
6.99909	3.49955	-3.58162e-05		0.000161054		1.27236e-05		1.90508e-05
7.01593	3.50796	-3.85699e-05		0.000164108		1.50132e-05		1.82405e-05
7.03276	3.51638	-4.1567e-05		0.000167012		1.71106e-05		1.73614e-05
7.04959	3.5248	-4.47741e-05		0.000169724		1.9029e-05		1.64426e-05
7.06643	3.53321	-4.81608e-05		0.000172196		2.07886e-05		1.55129e-05
7.08326	3.54163	-5.17016e-05		0.000174376		2.24135e-05		1.45996e-05
7.1001	3.55005	-5.53799e-05		0.000176215		2.39298e-05		1.37277e-05
7.11693	3.55847	-5.91815e-05		0.000177667		2.5362e-05		1.29202e-05
7.13377	3.56688	-6.31035e-05		0.000178695		2.67329e-05		1.21972e-05
7.1506	3.5753	-6.71528e-05		0.000179274		2.80608e-05		1.15763e-05
7.16744	3.58372	-7.13421e-05		0.000179395		2.93591e-05		1.10738e-05
7.18427	3.59214	-7.56912e-05		0.000179068		3.06354e-05		1.07021e-05
7.20111	3.60055	-8.02241e-05		0.000178318		3.1892e-05		1.0469e-05
7.21794	3.60897	-8.49611e-05		0.00017719		3.31255e-05		1.03775e-05
7.23477	3.61739	-8.99196e-05		0.000175743		3.4329e-05		1.04238e-05
7.25161	3.6258	-9.5107e-05		0.000174046		3.54931e-05		1.05963e-05
7.26844	3.63422	-0.000100515		0.000172177		3.6606e-05		1.08761e-05
7.28528	3.64264	-0.000106126		0.000170216		3.76595e-05		1.12368e-05
7.30211	3.65106	-0.000111905		0.000168241		3.86461e-05		1.16464e-05
7.31895	3.65947	-0.000117793		0.000166322		3.95613e-05		1.20696e-05
7.33578	3.66789	-0.000123713		0.000164519		4.04066e-05		1.24692e-05
7.35262	3.67631	-0.000129573		0.000162885		4.11877e-05		1.28118e-05
7.36945	3.68473	-0.000135272		0.000161458		4.19155e-05		1.30696e-05
7.38629	3.69314	-0.000140703		0.000160262		4.26052e-05		1.32228e-05
7.40312	3.70156	-0.000145761		0.000159305		4.32757e-05		1.32599e-05
7.41995	3.70998	-0.000150351		0.000158586		4.39477e-05		1.31792e-05
7.43679	3.71839	-0.000154396		0.000158089		4.46412e-05		1.29894e-05
7.45362	3.72681	-0.000157837		0.00015779		4.53749e-05		1.27091e-05
7.47046	3.73523	-0.000160647		0.000157657		4.61646e-05		1.23653e-05
7.48729	3.74365	-0.000162821		0.000157651		4.70212e-05		1.19913e-05
7.50413	3.75206	-0.000164393		0.000157734		4.79497e-05		1.16266e-05
7.52096	3.76048	-0.000165417		0.000157867		4.89483e-05		1.13127e-05
7.5378	3.7689	-0.000165964		0.000158011		5.00088e-05		1.10907e-05
7.55463	3.77732	-0.000166119		0.000158132		5.11179e-05		1.10014e-05
7.57147	3.78573	-0.000165966		0.000158195		5.22562e-05		1.10805e-05
7.5883	3.79415	-0.000165589		0.00015817		5.3399e-05		1.1356e-05
7.60513	3.80257	-0.000165052		0.000158034		5.45193e-05		1.18455e-05
7.62197	3.81098	-0.000164403		0.000157762		5.55867e-05		1.25533e-05
7.6388	3.8194	-0.00016366		0.000157335		5.65667e-05		1.34694e-05
7.65564	3.82782	-0.000162817		0.00015673		5.74201e-05		1.4569e-05
7.67247	3.83624	-0.000161837		0.000155926		5.81028e-05		1.5812e-05
7.68931	3.84465	-0.00016066		0.0001549		5.85672e-05		1.71445e-05
7.70614	3.85307	-0.000159212		0.000153627		5.87606e-05		1.85002e-05
7.72298	3.86149	-0.000157401		0.000152081		5.86286e-05		1.98056e-05
7.73981	3.86991	-0.000155134		0.000150235		5.81214e-05		2.09783e-05
7.75665	3.87832	-0.000152324		0.000148061		5.71979e-05		2.19293e-05
7.77348	3.88674	-0.000148904		0.000145536		5.58296e-05		2.25637e-05
7.79031	3.89516	-0.000144833		0.000142642		5.40051e-05		2.27783e-05
7.80715	3.90357	-0.000140101		0.000139368		5.17329e-05		2.24632e-05
7.82398	3.91199	-0.000134736		0.000135713		4.90417e-05		2.15009e-05
7.84082	3.92041	-0.000128807		0.000131692		4.598e-05		1.97659e-05
7.85765	3.92883	-0.000122414		0.000127337		4.2611e-05		1.71271e-05
7.87449	3.93724	-0.000115692		0.000122695		3.90096e-05		1.34516e-05
7.89132	3.94566	-0.000108796		0.00011783		3.52561e-05		8.61127e-06
7.90816	3.95408	-0.000101901		0.000112818		3.14311e-05		2.48732e-06
7.92499	3.9625	-9.51857e-05		0.000107747		2.7609e-05		-5.01562e-06
7.94183	3.97091	-8.88235e-05		0.000102711		2.3861e-05		-1.39615e-05
7.95866	3.97933	-8.29754e-05		9.78027e-05		2.02492e-05		-2.43747e-05
7.97549	3.98775	-7.77861e-05		9.3112e-05		1.68285e-05		-3.62297e-05
7.99233	3.99616	-7.33725e-05		8.87173e-05		1.3647e-05		-4.94466e-05
8.00916	4.00458	-6.98232e-05		8.46837e-05		1.07467e-05		-6.38897e-05
8.026	4.013	-6.71966e-05		8.10621e-05		8.16548e-06		-7.93687e-05
8.04283	4.02142	-6.55196e-05		7.78858e-05		5.93777e-06		-9.56487e-05
8.05967	4.02983	-6.47852e-05		7.51713e-05		4.09205e-06		-0.000112462
8.0765	4.03825	-6.4948e-05		7.29137e-05		2.65026e-06		-0.000129525
8.09334	4.04667	-6.59328e-05		7.10873e-05		1.62489e-06		-0.000146569
8.11017	4.05509	-6.76268e-05		6.9654e-05		1.01864e-06		-0.000163355
8.12701	4.0635	-6.98878e-05		6.85576e-05		8.20752e-07		-0.000179705
8.14384	4.07192	-7.25444e-05		6.77264e-05		1.00896e-06		-0.000195515
8.16068	4.08034	-7.54012e-05		6.70806e-05		1.55213e-06		-0.000210767
8.17751	4.08875	-7.82412e-05		6.65314e-05		2.41001e-06		-0.000225532
8.19434	4.09717	-8.08378e-05		6.59866e-05		3.53639e-06		-0.000239957
8.21118	4.10559	-8.29641e-05		6.53546e-05		4.88361e-06		-0.000254243
8.22801	4.11401	-8.44045e-05		6.45511e-05		6.4046e-06		-0.000268626
8.24485	4.12242	-8.49696e-05		6.35005e-05		8.05645e-06		-0.00028334
8.26168	4.13084	-8.45121e-05		6.21421e-05		9.80293e-06		-0.000298598
8.27852	4.13926	-8.29369e-05		6.04291e-05		1.16153e-05		-0.000314568
8.29535	4.14768	-8.02094e-05		5.83356e-05		1.34726e-05		-0.000331361
8.31219	4.15609	-7.63621e-05		5.58565e-05		1.53603e-05		-0.00034903
8.32902	4.16451	-7.14929e-05		5.30061e-05		1.7269e-05		-0.00036757
8.34586	4.17293	-6.57588e-05		4.98183e-05		1.91922e-05		-0.000386924
8.36269	4.18134	-5.93635e-05		4.63447e-05		2.11229e-05		-0.000407001
8.37952	4.18976	-5.25431e-05		4.26476e-05		2.30504e-05		-0.000427681
8.39636	4.19818	-4.55415e-05		3.88024e-05		2.49614e-05		-0.000448826
8.41319	4.2066	-3.85902e-05		3.48903e-05		2.68378e-05		-0.000470282
8.43003	4.21501	-3.18935e-05		3.09937e-05		2.86569e-05		-0.000491887
8.44686	4.22343	-2.56135e-05		2.71903e-05		3.0391e-05		-0.000513472
8.4637	4.23185	-1.98587e-05		2.35532e-05		3.20113e-05		-0.00053487
8.48053	4.24027	-1.46814e-05		2.01442e-05		3.34882e-05		-0.000555912
8.49737	4.24868	-1.0082e-05		1.70116e-05		3.47938e-05		-0.000576439
8.5142	4.2571	-6.01793e-06		1.41919e-05		3.59033e-05		-0.000596301
8.53104	4.26552	-2.41571e-06		1.17076e-05		3.67968e-05		-0.000615369
8.54787	4.27393	8.17832e-07		9.57172e-06		3.74604e-05		-0.000633532
8.5647	4.28235	3.77824e-06		7.79076e-06		3.78863e-05		-0.000650706
8.58154	4.29077	6.56085e-06		6.36778e-06		3.80722e-05		-0.000666836
8.59837	4.29919	9.24159e-06		5.30478e-06		3.80203e-05		-0.000681893
8.61521	4.3076	1.18753e-05		4.60589e-06		3.7738e-05		-0.000695877
8.63204	4.31602	1.44891e-05		4.27503e-06		3.72334e-05		-0.000708811
8.64888	4.32444	1.70845e-05		4.32164e-06		3.65143e-05		-0.000720743
8.66571	4.33286	1.96359e-05		4.75456e-06		3.55875e-05		-0.000731739
8.68255	4.34127	2.20997e-05		5.58071e-06		3.44563e-05		-0.000741874
8.69938	4.34969	2.44156e-05		6.80027e-06		3.31218e-05		-0.000751235
8.71622	4.35811	2.65113e-05		8.40768e-06		3.15826e-05		-0.000759909
8.73305	4.36653	2.83068e-05		1.03851e-05		2.9838e-05		-0.000767983
8.74988	4.37494	2.97226e-05		1.27012e-05		2.78908e-05		-0.000775537
8.76672	4.38336	3.06814e-05		1.53118e-05		2.57499e-05		-0.000782648
8.78355	4.39178	3.11133e-05		1.81589e-05		2.34321e-05		-0.000789379
8.80039	4.40019	3.09605e-05		2.11733e-05		2.09655e-05		-0.000795786
8.81722	4.40861	3.01811e-05		2.4277e-05		1.83879e-05		-0.00080191
8.83406	4.41703	2.87528e-05		2.73923e-05		1.57528e-05		-0.000807783
8.85089	4.42545	2.66677e-05		3.04411e-05		1.31224e-05		-0.000813428
8.86773	4.43386	2.39424e-05		3.33508e-05		1.05677e-05		-0.000818854
8.88456	4.44228	2.06223e-05		3.60624e-05		8.16316e-06		-0.000824063
8.9014	4.4507	1.67727e-05		3.85309e-05		5.98334e-06		-0.000829054
8.91823	4.45912	1.24808e-05		4.07277e-05		4.09808e-06		-0.00083382
8.93506	4.46753	7.85487e-06		4.26399e-05		2.56786e-06		-0.000838355
8.9519	4.47595	3.02462e-06		4.42731e-05		1.44091e-06		-0.000842654
8.96873	4.48437	-1.878e-06		4.56429e-05		7.51005e-07		-0.000846713
8.98557	4.49278	-6.70999e-06		4.67722e-05		5.1446e-07		-0.000850531
9.0024	4.5012	-1.13268e-05		4.76839e-05		7.29826e-07		-0.000854113
9.01924	4.50962	-1.55921e-05		4.83968e-05		1.37882e-06		-0.000857469
9.03607	4.51804	-1.93759e-05		4.89259e-05		2.42734e-06		-0.000860613
9.05291	4.52645	-2.25699e-05		4.92755e-05		3.82779e-06		-0.000863564
9.06974	4.53487	-2.5086e-05		4.94401e-05		5.51929e-06		-0.000866347
9.08658	4.54329	-2.68648e-05		4.94071e-05		7.4336e-06		-0.000868985
9.10341	4.55171	-2.78639e-05		4.91572e-05		9.49756e-06		-0.000871503
9.12024	4.56012	-2.80656e-05		4.86713e-05		1.16345e-05		-0.000873921
9.13708	4.56854	-2.74738e-05		4.79359e-05		1.37662e-05		-0.000876258
9.15391	4.57696	-2.61108e-05		4.69456e-05		1.58153e-05		-0.000878523
9.17075	4.58537	-2.40127e-05		4.57064e-05		1.77075e-05		-0.00088072
9.18758	4.59379	-2.12281e-05		4.42369e-05		1.93747e-05		-0.000882844
9.20442	4.60221	-1.78105e-05		4.25674e-05		2.0756e-05		-0.000884884
9.22125	4.61063	-1.38206e-05		4.07362e-05		2.17989e-05		-0.000886823
9.23809	4.61904	-9.32522e-06		3.87904e-05		2.24614e-05		-0.000888642
9.25492	4.62746	-4.39029e-06		3.67765e-05		2.2712e-05		-0.000890315
9.27176	4.63588	9.18385e-07		3.47376e-05		2.25314e-05		-0.000891819
9.28859	4.6443	6.53309e-06		3.27089e-05		2.19113e-05		-0.000893132
9.30542	4.65271	1.23833e-05		3.07153e-05		2.08553e-05		-0.000894233
9.32226	4.66113	1.83966e-05		2.87697e-05		1.93768e-05		-0.00089511
9.33909	4.66955	2.44928e-05		2.68726e-05		1.74981e-05		-0.000895755
9.35593	4.67796	3.05909e-05		2.5013e-05		1.52485e-05		-0.000896169
9.37276	4.68638	3.66053e-05		2.3172e-05		1.26624e-05		-0.000896364
9.3896	4.6948	4.24477e-05		2.13243e-05		9.7777e-06		-0.000896359
9.40643	4.70322	4.80266e-05		1.94427e-05		6.63407e-06		-0.000896182
9.42327	4.71163	5.32553e-05		1.75016e-05		3.27151e-06		-0.000895869
9.4401	4.72005	5.80528e-05		1.54809e-05		-2.711e-07		-0.000895462
9.45694	4.72847	6.23454e-05		1.33635e-05		-3.95382e-06		-0.000895005
9.47377	4.73689	6.60695e-05		1.11435e-05		-7.73797e-06		-0.00089454
9.49061	4.7453	6.91788e-05		8.82444e-06		-1.15847e-05		-0.000894109
9.50744	4.75372	7.16417e-05		6.41833e-06		-1.54542e-05		-0.000893751
9.52427	4.76214	7.34451e-05		3.94478e-06		-1.93048e-05		-0.000893494
9.54111	4.77055	7.45823e-05		1.42903e-06		-2.30923e-05		-0.000893361
9.55794	4.77897	7.50649e-05		-1.10019e-06		-2.67699e-05		-0.000893366
9.57478	4.78739	7.4916e-05		-3.61246e-06		-3.02905e-05		-0.000893515
9.59161	4.79581	7.41675e-05		-6.08027e-06		-3.36067e-05		-0.000893811
9.60845	4.80422	7.28599e-05		-8.47691e-06		-3.6674e-05		-0.000894248
9.62528	4.81264	7.1046e-05		-1.07798e-05		-3.94539e-05		-0.000894816
9.64212	4.82106	6.87896e-05		-1.29721e-05		-4.19167e-05		-0.0008955
9.65895	4.82948	6.61658e-05		-1.50419e-05		-4.40439e-05		-0.000896283
9.67579	4.83789	6.32632e-05		-1.69855e-05		-4.58292e-05		-0.000897148
9.69262	4.84631	6.01769e-05		-1.88043e-05		-4.7279e-05		-0.000898075
9.70945	4.85473	5.70019e-05		-2.05042e-05		-4.84109e-05		-0.000899047
9.72629	4.86314	5.38298e-05		-2.20966e-05		-4.92511e-05		-0.000900049
9.74312	4.87156	5.07371e-05		-2.35972e-05		-4.9831e-05		-0.000901069
9.75996	4.87998	4.77768e-05		-2.50242e-05		-5.01846e-05		-0.000902104
9.77679	4.8884	4.49703e-05		-2.63965e-05		-5.03421e-05		-0.000903149
9.79363	4.89681	4.23038e-05		-2.77321e-05		-5.03308e-05		-0.000904206
9.81046	4.90523	3.97314e-05		-2.90461e-05		-5.01696e-05		-0.00090528
9.8273	4.91365	3.71827e-05		-3.03511e-05		-4.98712e-05		-0.000906379
9.84413	4.92207	3.45753e-05		-3.16558e-05		-4.94417e-05		-0.000907513
9.86097	4.93048	3.18301e-05		-3.29649e-05		-4.88825e-05		-0.00090869
9.8778	4.9389	2.88887e-05		-3.42807e-05		-4.81931e-05		-0.000909919
9.89463	4.94732	2.57196e-05		-3.56019e-05		-4.7373e-05		-0.00091121
9.91147	4.95573	2.23369e-05		-3.69245e-05		-4.64248e-05		-0.000912573
9.9283	4.96415	1.87966e-05		-3.82418e-05		-4.53564e-05		-0.000914018
9.94514	4.97257	1.5193e-05		-3.95438e-05		-4.41842e-05		-0.000915557
9.96197	4.98099	1.16515e-05		-4.08164e-05		-4.29301e-05		-0.000917206
9.97881	4.9894	8.30733e-06		-4.20424e-05		-4.16238e-05		-0.00091898
9.99564	4.99782	5.29678e-06		-4.31987e-05		-4.02982e-05		-0.000920897
10.0125	5.00624	2.74102e-06		-4.42577e-05		-3.89914e-05		-0.000922969
10.0293	5.01466	7.31935e-07		-4.5188e-05		-3.77422e-05		-0.000925206
10.0461	5.02307	-6.76127e-07		-4.59559e-05		-3.65864e-05		-0.000927612
10.063	5.03149	-1.47035e-06		-4.65263e-05		-3.55577e-05		-0.000930183
10.0798	5.03991	-1.67889e-06		-4.6866e-05		-3.46832e-05		-0.000932903
10.0966	5.04832	-1.36735e-06		-4.69455e-05		-3.3982e-05		-0.000935746
10.1135	5.05674	-6.28376e-07		-4.67442e-05		-3.34632e-05		-0.00093868
10.1303	5.06516	4.25357e-07		-4.6248e-05		-3.31256e-05		-0.000941663
10.1472	5.07358	1.66613e-06		-4.54557e-05		-3.2958e-05		-0.000944651
10.164	5.08199	2.96622e-06		-4.4378e-05		-3.29423e-05		-0.000947596
10.1808	5.09041	4.20504e-06		-4.30369e-05		-3.305e-05		-0.000950453
10.1977	5.09883	5.27666e-06		-4.14628e-05		-3.32474e-05		-0.00095318
10.2145	5.10725	6.10888e-06		-3.9694e-05		-3.34987e-05		-0.000955742
10.2313	5.11566	6.66622e-06		-3.77709e-05		-3.3768e-05		-0.0009581
10.2482	5.12408	6.95303e-06		-3.57355e-05		-3.40227e-05		-0.000960251
10.265	5.1325	7.01653e-06		-3.36258e-05		-3.42369e-05		-0.000962194
10.2818	5.14091	6.93736e-06		-3.14742e-05		-3.43931e-05		-0.000963928
10.2987	5.14933	6.8225e-06		-2.93038e-05		-3.44824e-05		-0.000965469
10.3155	5.15775	6.79219e-06		-2.71263e-05		-3.45049e-05		-0.000966838
10.3323	5.16617	6.96984e-06		-2.49425e-05		-3.447e-05		-0.000968059
10.3492	5.17458	7.46373e-06		-2.27446e-05		-3.43924e-05		-0.000969161
10.366	5.183	8.3542e-06		-2.0519e-05		-3.42922e-05		-0.000970177
10.3828	5.19142	9.68795e-06		-1.82498e-05		-3.41921e-05		-0.000971139
10.3997	5.19984	1.14667e-05		-1.59226e-05		-3.41162e-05		-0.000972068
10.4165	5.20825	1.36557e-05		-1.35263e-05		-3.40865e-05		-0.000972975
10.4333	5.21667	1.61852e-05		-1.10563e-05		-3.41223e-05		-0.000973847
10.4502	5.22509	1.89587e-05		-8.51552e-06		-3.42418e-05		-0.000974676
10.467	5.2335	2.18637e-05		-5.913e-06		-3.44615e-05		-0.000975442
10.4838	5.24192	2.47708e-05		-3.2633e-06		-3.47971e-05		-0.000976128
10.5007	5.25034	2.75572e-05		-5.83073e-07		-3.52628e-05		-0.00097672
10.5175	5.25876	3.01049e-05		2.10913e-06		-3.58717e-05		-0.000977202
10.5343	5.26717	3.23056e-05		4.79803e-06		-3.66336e-05		-0.000977584
10.5512	5.27559	3.40634e-05		7.47069e-06		-3.75547e-05		-0.000977882
10.568	5.28401	3.52979e-05		1.01171e-05		-3.86356e-05		-0.000978129
10.5849	5.29243	3.59566e-05		1.27304e-05		-3.98699e-05		-0.000978354
10.6017	5.30084	3.60058e-05		1.53068e-05		-4.1243e-05		-0.00097859
10.6185	5.30926	3.5437e-05		1.78426e-05		-4.27323e-05		-0.000978869
10.6354	5.31768	3.42695e-05		2.03351e-05		-4.43075e-05		-0.000979226
10.6522	5.32609	3.25477e-05		2.27814e-05		-4.59317e-05		-0.00097969
10.669	5.33451	3.03416e-05		2.51746e-05		-4.75645e-05		-0.000980282
10.6859	5.34293	2.77432e-05		2.75086e-05		-4.91602e-05		-0.000981009
10.7027	5.35135	2.48612e-05		2.97768e-05		-5.06738e-05		-0.000981865
10.7195	5.35976	2.18164e-05		3.19698e-05		-5.20618e-05		-0.000982831
10.7364	5.36818	1.87292e-05		3.40735e-05		-5.32854e-05		-0.000983885
10.7532	5.3766	1.57125e-05		3.6067e-05		-5.43094e-05		-0.000984994
10.77	5.38502	1.28682e-05		3.79219e-05		-5.51049e-05		-0.000986122
10.7869	5.39343	1.02767e-05		3.96032e-05		-5.56486e-05		-0.000987235
10.8037	5.40185	7.98979e-06		4.10659e-05		-5.59238e-05		-0.000988303
10.8205	5.41027	6.0331e-06		4.22568e-05		-5.5919e-05		-0.000989301
10.8374	5.41868	4.40045e-06		4.31179e-05		-5.56279e-05		-0.000990216
10.8542	5.4271	3.05605e-06		4.35896e-05		-5.50483e-05		-0.000991048
10.871	5.43552	1.93952e-06		4.36166e-05		-5.41855e-05		-0.000991805
10.8879	5.44394	9.72143e-07		4.31503e-05		-5.30485e-05		-0.000992506
10.9047	5.45235	6.56923e-08		4.21566e-05		-5.16535e-05		-0.000993177
10.9215	5.46077	-8.69685e-07		4.06181e-05		-5.00248e-05		-0.000993848
10.9384	5.46919	-1.90999e-06		3.85365e-05		-4.81959e-05		-0.000994553
10.9552	5.47761	-3.11263e-06		3.59327e-05		-4.62106e-05		-0.000995318
10.972	5.48602	-4.50902e-06		3.28454e-05		-4.41235e-05		-0.000996167
10.9889	5.49444	-6.10273e-06		2.93332e-05		-4.19961e-05		-0.000997112
11.0057	5.50286	-7.86574e-06		2.54687e-05		-3.98966e-05		-0.000998155
11.0225	5.51127	-9.7472e-06		2.13362e-05		-3.78957e-05		-0.000999286
11.0394	5.51969	-1.16773e-05		1.70283e-05		-3.60611e-05		-0.00100048
11.0562	5.52811	-1.35755e-05		1.26426e-05		-3.44553e-05		-0.00100172
11.0731	5.53653	-1.53685e-05		8.27754e-06		-3.31275e-05		-0.00100297
11.0899	5.54494	-1.69793e-05		4.03229e-06		-3.21118e-05		-0.00100419
11.1067	5.55336	-1.83464e-05		4.46636e-09		-3.14244e-05		-0.00100534
11.1236	5.56178	-1.9427e-05		-3.7167e-06		-3.10633e-05		-0.0010064
11.1404	5.5702	-2.01976e-05		-7.05043e-06		-3.10099e-05		-0.00100733
11.1572	5.57861	-2.06564e-05		-9.92758e-06		-3.12328e-05		-0.00100812
11.1741	5.58703	-2.08208e-05		-1.22947e-05		-3.16894e-05		-0.00100876
11.1909	5.59545	-2.07218e-05		-1.41124e-05		-3.23314e-05		-0.00100925
11.2077	5.60386	-2.03983e-05		-1.53585e-05		-3.31089e-05		-0.00100959
11.2246	5.61228	-1.98969e-05		-1.60285e-05		-3.3972e-05		-0.00100982
11.2414	5.6207	-1.9265e-05		-1.61358e-05		-3.48743e-05		-0.00100996
11.2582	5.62912	-1.85358e-05		-1.57119e-05		-3.57747e-05		-0.00101006
11.2751	5.63753	-1.77301e-05		-1.48039e-05		-3.66363e-05		-0.00101015
11.2919	5.64595	-1.68543e-05		-1.34715e-05		-3.74278e-05		-0.0010103
11.3087	5.65437	-1.58986e-05		-1.17826e-05		-3.81238e-05		-0.00101054
11.3256	5.66279	-1.48395e-05		-9.81005e-06		-3.8703e-05		-0.00101094
11.3424	5.6712	-1.36336e-05		-7.62726e-06		-3.91492e-05		-0.00101155
11.3592	5.67962	-1.22289e-05		-5.30339e-06		-3.94512e-05		-0.00101239
11.3761	5.68804	-1.05716e-05		-2.89811e-06		-3.96037e-05		-0.00101351
11.3929	5.69645	-8.61109e-06		-4.59488e-07		-3.96082e-05		-0.00101492
11.4097	5.70487	-6.30953e-06		1.97688e-06		-3.94732e-05		-0.00101662
11.4266	5.71329	-3.64632e-06		4.39125e-06		-3.92134e-05		-0.00101861
11.4434	5.72171	-6.21389e-07		6.76832e-06		-3.88491e-05		-0.00102087
11.4602	5.73012	2.7431e-06		9.10254e-06		-3.84044e-05		-0.00102337
11.4771	5.73854	6.39566e-06		1.13934e-05		-3.79054e-05		-0.00102606
11.4939	5.74696	1.02617e-05		1.36404e-05		-3.73772e-05		-0.0010289
11.5108	5.75538	1.42426e-05		1.58385e-05		-3.68416e-05		-0.00103184
11.5276	5.76379	1.82292e-05		1.7976e-05		-3.63157e-05		-0.00103485
11.5444	5.77221	2.211e-05		2.00326e-05		-3.58077e-05		-0.00103786
11.5613	5.78063	2.57765e-05		2.19787e-05		-3.53211e-05		-0.00104086
11.5781	5.78904	2.91297e-05		2.37769e-05		-3.48521e-05		-0.00104379
11.5949	5.79746	3.2086e-05		2.53843e-05		-3.43901e-05		-0.00104664
11.6118	5.80588	3.4588e-05		2.67554e-05		-3.39216e-05		-0.00104939
11.6286	5.8143	3.66016e-05		2.78474e-05		-3.34323e-05		-0.001052
11.6454	5.82271	3.81166e-05		2.86231e-05		-3.29083e-05		-0.00105448
11.6623	5.83113	3.91439e-05		2.90543e-05		-3.23398e-05		-0.00105681
11.6791	5.83955	3.97144e-05		2.91258e-05		-3.17205e-05		-0.00105898
11.6959	5.84797	3.98728e-05		2.88354e-05		-3.10472e-05		-0.00106098
11.7128	5.85638	3.9673e-05		2.81995e-05		-3.03198e-05		-0.00106281
11.7296	5.8648	3.91768e-05		2.72512e-05		-2.95403e-05		-0.00106445
11.7464	5.87322	3.84487e-05		2.60412e-05		-2.87119e-05		-0.00106591
11.7633	5.88164	3.75618e-05		2.46342e-05		-2.78372e-05		-0.00106716
11.7801	5.89005	3.65928e-05		2.31073e-05		-2.69184e-05		-0.0010682
11.7969	5.89847	3.56241e-05		2.1546e-05		-2.59552e-05		-0.00106903
11.8138	5.90689	3.47447e-05		2.00416e-05		-2.49459e-05		-0.00106963
11.8306	5.9153	3.40472e-05		1.86836e-05		-2.38871e-05		-0.00106999
11.8474	5.92372	3.36285e-05		1.75601e-05		-2.2773e-05		-0.00107011
11.8643	5.93214	3.35836e-05		1.6748e-05		-2.15965e-05		-0.00106998
11.8811	5.94056	3.3998e-05		1.63114e-05		-2.03511e-05		-0.00106961
11.8979	5.94897	3.49416e-05		1.62959e-05		-1.90314e-05		-0.00106899
11.9148	5.95739	3.64599e-05		1.67273e-05		-1.76342e-05		-0.00106814
11.9316	5.96581	3.85693e-05		1.76101e-05		-1.61609e-05		-0.00106705
11.9485	5.97423	4.12516e-05		1.89328e-05		-1.46187e-05		-0.00106575
11.9653	5.98264	4.44531e-05		2.06669e-05		-1.30222e-05		-0.00106425
11.9821	5.99106	4.80842e-05		2.27695e-05		-1.13953e-05		-0.00106257
11.999	5.99948	5.20337e-05		2.51891e-05		-9.77042e-06		-0.00106074
12.0158	6.00789	5.61765e-05		2.78684e-05		-8.18799e-06		-0.00105878
12.0326	6.01631	6.03835e-05		3.07488e-05		-6.696e-06		-0.00105675
12.0495	6.02473	6.4537e-05		3.37747e-05		-5.34632e-06		-0.00105467
12.0663	6.03315	6.85402e-05		3.6895e-05		-4.19188e-06		-0.00105259
12.0831	6.04156	7.23217e-05		4.00648e-05		-3.28295e-06		-0.00105058
12.1	6.04998	7.58412e-05		4.32491e-05		-2.66006e-06		-0.00104868
12.1168	6.0584	7.90856e-05		4.64214e-05		-2.35149e-06		-0.00104694
12.1336	6.06682	8.20662e-05		4.95634e-05		-2.36912e-06		-0.00104543
12.1505	6.07523	8.48143e-05		5.2663e-05		-2.70683e-06		-0.0010442
12.1673	6.08365	8.73652e-05		5.57133e-05		-3.33964e-06		-0.00104328
12.1841	6.09207	8.97607e-05		5.87099e-05		-4.22573e-06		-0.0010427
12.201	6.10048	9.20383e-05		6.16503e-05		-5.31146e-06		-0.00104249
12.2178	6.1089	9.4231e-05		6.45316e-05		-6.53122e-06		-0.00104264
12.2346	6.11732	9.6376e-05		6.73492e-05		-7.8177e-06		-0.00104314
12.2515	6.12574	9.85081e-05		7.00973e-05		-9.10741e-06		-0.00104397
12.2683	6.13415	0.000100664		7.27646e-05		-1.03465e-05		-0.00104508
12.2851	6.14257	0.000102892		7.53405e-05		-1.1495e-05		-0.00104643
12.302	6.15099	0.000105238		7.78126e-05		-1.25313e-05		-0.00104796
12.3188	6.15941	0.00010775		8.01681e-05		-1.34529e-05		-0.00104961
12.3356	6.16782	0.000110476		8.23981e-05		-1.42767e-05		-0.00105134
12.3525	6.17624	0.000113453		8.44959e-05		-1.50351e-05		-0.00105309
12.3693	6.18466	0.000116707		8.64584e-05		-1.57741e-05		-0.00105482
12.3861	6.19307	0.000120246		8.82866e-05		-1.65478e-05		-0.0010565
12.403	6.20149	0.000124059		8.99824e-05		-1.74134e-05		-0.00105811
12.4198	6.20991	0.000128123		9.15551e-05		-1.84263e-05		-0.00105963
12.4367	6.21833	0.000132397		9.30142e-05		-1.96326e-05		-0.00106105
12.4535	6.22674	0.000136832		9.43697e-05		-2.10652e-05		-0.00106237
12.4703	6.23516	0.000141375		9.5631e-05		-2.27403e-05		-0.00106358
12.4872	6.24358	0.000145966		9.68072e-05		-2.46557e-05		-0.00106469
12.504	6.252	0.00015055		9.79059e-05		-2.67898e-05		-0.0010657
12.5208	6.26041	0.000155069		9.89331e-05		-2.91031e-05		-0.00106663
12.5377	6.26883	0.000159461		9.98935e-05		-3.15424e-05		-0.00106749
12.5545	6.27725	0.000163676		0.000100789		-3.4044e-05		-0.0010683
12.5713	6.28566	0.000167668		0.000101621		-3.65377e-05		-0.00106909
12.5882	6.29408	0.000171404		0.000102384		-3.89519e-05		-0.00106988
12.605	6.3025	0.00017486		0.00010307		-4.12216e-05		-0.00107073
12.6218	6.31092	0.000178031		0.000103664		-4.32914e-05		-0.00107165
12.6387	6.31933	0.000180934		0.000104145		-4.512e-05		-0.00107267
12.6555	6.32775	0.000183595		0.000104488		-4.66806e-05		-0.00107382
12.6723	6.33617	0.000186058		0.000104667		-4.79637e-05		-0.00107511
12.6892	6.34459	0.000188377		0.000104658		-4.89776e-05		-0.00107653
12.706	6.353	0.000190598		0.000104438		-4.97435e-05		-0.00107806
12.7228	6.36142	0.000192766		0.000103996		-5.02938e-05		-0.00107969
12.7397	6.36984	0.000194897		0.00010333		-5.0668e-05		-0.00108139
12.7565	6.37825	0.00019699		0.000102454		-5.09101e-05		-0.0010831
12.7733	6.38667	0.000199028		0.000101394		-5.10641e-05		-0.00108482
12.7902	6.39509	0.000200976		0.000100186		-5.11701e-05		-0.00108649
12.807	6.40351	0.000202787		9.8874e-05		-5.12612e-05		-0.00108809
12.8238	6.41192	0.000204414		9.75044e-05		-5.13612e-05		-0.0010896
12.8407	6.42034	0.00020582		9.61148e-05		-5.14855e-05		-0.00109102
12.8575	6.42876	0.000206983		9.47372e-05		-5.16379e-05		-0.00109232
12.8744	6.43718	0.000207899		9.33913e-05		-5.18123e-05		-0.00109352
12.8912	6.44559	0.000208591		9.20831e-05		-5.19955e-05		-0.00109464
12.908	6.45401	0.000209101		9.08058e-05		-5.21701e-05		-0.00109567
12.9249	6.46243	0.000209488		8.95429e-05		-5.23155e-05		-0.00109664
12.9417	6.47084	0.000209826		8.82734e-05		-5.24115e-05		-0.00109758
12.9585	6.47926	0.000210189		8.69771e-05		-5.24433e-05		-0.0010985
12.9754	6.48768	0.000210644		8.56369e-05		-5.24031e-05		-0.00109943
12.9922	6.4961	0.000211258		8.42429e-05		-5.22903e-05		-0.00110037
13.009	6.50451	0.0002121		8.27938e-05		-5.21106e-05		-0.00110135
13.0259	6.51293	0.000213228		8.13003e-05		-5.18776e-05		-0.00110237
13.0427	6.52135	0.000214692		7.97807e-05		-5.16103e-05		-0.00110344
13.0595	6.52977	0.000216539		7.82576e-05		-5.1331e-05		-0.00110454
13.0764	6.53818	0.00021881		7.67563e-05		-5.10629e-05		-0.00110566
13.0932	6.5466	0.000221529		7.53025e-05		-5.08268e-05		-0.00110679
13.11	6.55502	0.000224703		7.39153e-05		-5.06388e-05		-0.0011079
13.1269	6.56343	0.000228335		7.26069e-05		-5.05083e-05		-0.00110895
13.1437	6.57185	0.000232399		7.13817e-05		-5.04356e-05		-0.00110993
13.1605	6.58027	0.000236844		7.02309e-05		-5.04127e-05		-0.00111078
13.1774	6.58869	0.000241588		6.91409e-05		-5.04237e-05		-0.00111149
13.1942	6.5971	0.000246526		6.80891e-05		-5.04477e-05		-0.00111203
13.211	6.60552	0.00025153		6.70473e-05		-5.04579e-05		-0.00111238
13.2279	6.61394	0.000256448		6.59805e-05		-5.04275e-05		-0.00111253
13.2447	6.62236	0.000261118		6.48543e-05		-5.03323e-05		-0.00111246
13.2615	6.63077	0.000265382		6.36341e-05		-5.01545e-05		-0.00111219
13.2784	6.63919	0.000269085		6.22884e-05		-4.98828e-05		-0.0011117
13.2952	6.64761	0.000272085		6.07921e-05		-4.95169e-05		-0.00111101
13.312	6.65602	0.000274259		5.91248e-05		-4.90666e-05		-0.00111013
13.3289	6.66444	0.000275505		5.72734e-05		-4.85497e-05		-0.00110905
13.3457	6.67286	0.000275744		5.52334e-05		-4.79906e-05		-0.0011078
13.3626	6.68128	0.000274926		5.30072e-05		-4.74184e-05		-0.00110638
13.3794	6.68969	0.00027302		5.06029e-05		-4.68601e-05		-0.00110479
13.3962	6.69811	0.000270025		4.80328e-05		-4.63377e-05		-0.00110302
13.4131	6.70653	0.000265957		4.53122e-05		-4.58639e-05		-0.00110109
13.4299	6.71495	0.000260858		4.24584e-05		-4.54404e-05		-0.00109899
13.4467	6.72336	0.000254787		3.94915e-05		-4.50568e-05		-0.00109672
13.4636	6.73178	0.000247824		3.64359e-05		-4.46928e-05		-0.00109431
13.4804	6.7402	0.000240058		3.33195e-05		-4.43198e-05		-0.00109176
13.4972	6.74861	0.000231589		3.01753e-05		-4.39075e-05		-0.0010891
13.5141	6.75703	0.000222511		2.70428e-05		-4.34217e-05		-0.00108638
13.5309	6.76545	0.00021292		2.39673e-05		-4.28344e-05		-0.00108363
13.5477	6.77387	0.000202898		2.09989e-05		-4.21248e-05		-0.00108091
13.5646	6.78228	0.00019251		1.81898e-05		-4.12831e-05		-0.00107828
13.5814	6.7907	0.000181802		1.55906e-05		-4.03099e-05		-0.00107577
13.5982	6.79912	0.000170803		1.32474e-05		-3.92153e-05		-0.00107343
13.6151	6.80754	0.000159532		1.11988e-05		-3.80183e-05		-0.00107129
13.6319	6.81595	0.000148006		9.47371e-06		-3.674e-05		-0.00106936
13.6487	6.82437	0.000136251		8.0909e-06		-3.54034e-05		-0.00106764
13.6656	6.83279	0.00012431		7.05842e-06		-3.4028e-05		-0.0010661
13.6824	6.8412	0.000112256		6.37546e-06		-3.26272e-05		-0.00106471
13.6992	6.84962	0.000100192		6.03434e-06		-3.12072e-05		-0.00106343
13.7161	6.85804	8.82495e-05		6.02335e-06		-2.97621e-05		-0.00106221
13.7329	6.86646	7.65823e-05		6.3284e-06		-2.82774e-05		-0.00106098
13.7497	6.87487	6.53556e-05		6.93508e-06		-2.67305e-05		-0.0010597
13.7666	6.88329	5.47372e-05		7.82753e-06		-2.5096e-05		-0.00105833
13.7834	6.89171	4.48774e-05		8.99323e-06		-2.33479e-05		-0.00105685
13.8003	6.90013	3.58965e-05		1.04174e-05		-2.1465e-05		-0.00105525
13.8171	6.90854	2.78743e-05		1.20827e-05		-1.94349e-05		-0.00105352
13.8339	6.91696	2.08458e-05		1.39689e-05		-1.72585e-05		-0.0010517
13.8508	6.92538	1.48011e-05		1.60469e-05		-1.49498e-05		-0.00104982
13.8676	6.93379	9.69091e-06		1.82856e-05		-1.25366e-05		-0.00104791
13.8844	6.94221	5.43257e-06		2.06455e-05		-1.00605e-05		-0.00104604
13.9013	6.95063	1.92892e-06		2.30813e-05		-7.572e-06		-0.00104423
13.9181	6.95905	-9.20744e-07		2.55427e-05		-5.1275e-06		-0.00104255
13.9349	6.96746	-3.2082e-06		2.79761e-05		-2.78403e-06		-0.00104102
13.9518	6.97588	-5.00585e-06		3.033e-05		-5.94525e-07		-0.00103966
13.9686	6.9843	-6.36132e-06		3.25565e-05		1.39673e-06		-0.00103848
13.9854	6.99272	-7.29673e-06		3.46183e-05		3.15513e-06		-0.00103746
14.0023	7.00113	-7.81321e-06		3.64892e-05		4.6585e-06		-0.0010366
14.0191	7.00955	-7.89909e-06		3.81579e-05		5.89784e-06		-0.00103584
14.0359	7.01797	-7.54252e-06		3.96273e-05		6.87557e-06		-0.00103515
14.0528	7.02638	-6.7442e-06		4.09136e-05		7.60324e-06		-0.00103446
14.0696	7.0348	-5.527e-06		4.20485e-05		8.10173e-06		-0.00103372
14.0864	7.04322	-3.94319e-06		4.30705e-05		8.39571e-06		-0.00103286
14.1033	7.05164	-2.07929e-06		4.40213e-05		8.51545e-06		-0.00103185
14.1201	7.06005	-5.66382e-08		4.49393e-05		8.4993e-06		-0.00103062
14.1369	7.06847	1.97479e-06		4.58538e-05		8.38646e-06		-0.00102915
14.1538	7.07689	3.84921e-06		4.67813e-05		8.21837e-06		-0.00102741
14.1706	7.08531	5.39619e-06		4.77278e-05		8.03649e-06		-0.0010254
14.1874	7.09372	6.45236e-06		4.86817e-05		7.88077e-06		-0.00102313
14.2043	7.10214	6.87718e-06		4.96196e-05		7.78718e-06		-0.0010206
14.2211	7.11056	6.5653e-06		5.05082e-05		7.78688e-06		-0.00101786
14.2379	7.11897	5.44965e-06		5.13138e-05		7.90506e-06		-0.00101493
14.2548	7.12739	3.50669e-06		5.20059e-05		8.15731e-06		-0.00101186
14.2716	7.13581	7.53851e-07		5.25626e-05		8.5506e-06		-0.0010087
14.2885	7.14423	-2.7541e-06		5.29719e-05		9.0822e-06		-0.0010055
14.3053	7.15264	-6.9348e-06		5.32339e-05		9.74307e-06		-0.00100229
14.3221	7.16106	-1.1683e-05		5.33587e-05		1.05181e-05		-0.000999135
14.339	7.16948	-1.68912e-05		5.33635e-05		1.13881e-05		-0.000996063
14.3558	7.1779	-2.24494e-05		5.32682e-05		1.23327e-05		-0.000993117
14.3726	7.18631	-2.82553e-05		5.30923e-05		1.33312e-05		-0.000990331
14.3895	7.19473	-3.42169e-05		5.28539e-05		1.43648e-05		-0.000987733
14.4063	7.20315	-4.02556e-05		5.25621e-05		1.54173e-05		-0.000985347
14.4231	7.21156	-4.63062e-05		5.2219e-05		1.64745e-05		-0.000983189
14.44	7.21998	-5.23152e-05		5.18174e-05		1.75227e-05		-0.000981274
14.4568	7.2284	-5.82365e-05		5.13476e-05		1.85495e-05		-0.000979603
14.4736	7.23682	-6.40257e-05		5.07975e-05		1.95411e-05		-0.000978172
14.4905	7.24523	-6.96413e-05		5.0155e-05		2.04821e-05		-0.000976965
14.5073	7.25365	-7.50425e-05		4.94121e-05		2.13548e-05		-0.000975959
14.5241	7.26207	-8.01865e-05		4.85652e-05		2.21398e-05		-0.00097512
14.541	7.27049	-8.50351e-05		4.76168e-05		2.28156e-05		-0.000974412
14.5578	7.2789	-8.95525e-05		4.6576e-05		2.33621e-05		-0.000973793
14.5746	7.28732	-9.37102e-05		4.54563e-05		2.37623e-05		-0.00097322
14.5915	7.29574	-9.74786e-05		4.42764e-05		2.40054e-05		-0.000972653
14.6083	7.30416	-0.000100834		4.30577e-05		2.40899e-05		-0.00097206
14.6251	7.31257	-0.000103756		4.18217e-05		2.4026e-05		-0.000971412
14.642	7.32099	-0.000106224		4.05897e-05		2.38346e-05		-0.000970692
14.6588	7.32941	-0.000108223		3.93799e-05		2.35478e-05		-0.000969891
14.6756	7.33782	-0.000109739		3.82083e-05		2.32055e-05		-0.000969012
14.6925	7.34624	-0.000110763		3.70882e-05		2.28535e-05		-0.000968062
14.7093	7.35466	-0.00011129		3.60289e-05		2.2538e-05		-0.000967056
14.7262	7.36308	-0.000111328		3.50366e-05		2.23017e-05		-0.000966015
14.743	7.37149	-0.000110897		3.41146e-05		2.21798e-05		-0.000964959
14.7598	7.37991	-0.000110035		3.32634e-05		2.21949e-05		-0.000963911
14.7767	7.38833	-0.000108804		3.24809e-05		2.23579e-05		-0.000962896
14.7935	7.39675	-0.000107282		3.17621e-05		2.26646e-05		-0.00096194
14.8103	7.40516	-0.000105563		3.10976e-05		2.30972e-05		-0.000961065
14.8272	7.41358	-0.000103754		3.04749e-05		2.36262e-05		-0.000960292
14.844	7.422	-0.000101965		2.98782e-05		2.42138e-05		-0.00095964
14.8608	7.43041	-0.000100296		2.92899e-05		2.48192e-05		-0.000959127
14.8777	7.43883	-9.88406e-05		2.86929e-05		2.54013e-05		-0.000958766
14.8945	7.44725	-9.76605e-05		2.80707e-05		2.59236e-05		-0.00095857
14.9113	7.45567	-9.68077e-05		2.74092e-05		2.63586e-05		-0.000958544
14.9282	7.46408	-9.6305e-05		2.67016e-05		2.66882e-05		-0.000958686
14.945	7.4725	-9.61432e-05		2.5947e-05		2.6911e-05		-0.000958984
14.9618	7.48092	-9.62898e-05		2.51537e-05		2.70373e-05		-0.000959414
14.9787	7.48934	-9.66925e-05		2.43378e-05		2.70891e-05		-0.000959942
14.9955	7.49775	-9.72795e-05		2.35249e-05		2.70969e-05		-0.000960515
15.0123	7.50617	-9.79682e-05		2.27488e-05		2.70971e-05		-0.000961069
15.0292	7.51459	-9.86705e-05		2.2046e-05		2.7127e-05		-0.00096152
15.046	7.523	-9.92986e-05		2.14563e-05		2.72249e-05		-0.000961765
15.0628	7.53142	-9.97688e-05		2.10196e-05		2.74273e-05		-0.000961678
15.0797	7.53984	-0.000100005		2.07704e-05		2.777e-05		-0.000961108
15.0965	7.54826	-9.99446e-05		2.07352e-05		2.82908e-05		-0.000959875
15.1133	7.55667	-9.95331e-05		2.09282e-05		2.90337e-05		-0.000957765
15.1302	7.56509	-9.87349e-05		2.13484e-05		3.00555e-05		-0.000954536
15.147	7.57351	-9.7523e-05		2.19782e-05		3.14326e-05		-0.00094992
15.1639	7.58193	-9.58778e-05		2.27839e-05		3.32673e-05		-0.000943625
15.1807	7.59034	-9.37876e-05		2.37175e-05		3.56935e-05		-0.000935358
15.1975	7.59876	-9.12387e-05		2.47195e-05		3.88776e-05		-0.000924832
15.2144	7.60718	-8.82203e-05		2.57224e-05		4.30147e-05		-0.000911797
15.2312	7.61559	-8.47269e-05		2.66558e-05		4.83213e-05		-0.000896053
15.248	7.62401	-8.07602e-05		2.74522e-05		5.5023e-05		-0.000877479
15.2649	7.63243	-7.63354e-05		2.80485e-05		6.33363e-05		-0.00085605
15.2817	7.64085	-7.14861e-05		2.83908e-05		7.34497e-05		-0.000831853
15.2985	7.64926	-6.62695e-05		2.84348e-05		8.55051e-05		-0.000805082
15.3154	7.65768	-6.0769e-05		2.81515e-05		9.95802e-05		-0.000776038
15.3322	7.6661	-5.50938e-05		2.75255e-05		0.000115677		-0.00074511
15.349	7.67452	-4.93788e-05		2.6553e-05		0.000133718		-0.000712753
15.3659	7.68293	-4.37848e-05		2.52414e-05		0.000153546		-0.000679455
15.3827	7.69135	-3.84729e-05		2.36073e-05		0.000174934		-0.000645714
15.3995	7.69977	-3.36058e-05		2.16753e-05		0.0001976		-0.000612001
15.4164	7.70818	-2.93347e-05		1.94743e-05		0.000221226		-0.000578749
15.4332	7.7166	-2.57867e-05		1.70358e-05		0.000245478		-0.000546328
15.45	7.72502	-2.30504e-05		1.43929e-05		0.000270025		-0.000515043
15.4669	7.73344	-2.11706e-05		1.15765e-05		0.000294554		-0.000485131
15.4837	7.74185	-2.01421e-05		8.61904e-06		0.00031879		-0.000456761
15.5005	7.75027	-1.99096e-05		5.54933e-06		0.000342497		-0.000430042
15.5174	7.75869	-2.03705e-05		2.39535e-06		0.000365483		-0.000405032
15.5342	7.76711	-2.13841e-05		-8.16644e-07		0.000387606		-0.000381742
15.551	7.77552	-2.2781e-05		-4.05744e-06		0.000408766		-0.000360149
15.5679	7.78394	-2.43758e-05		-7.29619e-06		0.000428901		-0.000340194
15.5847	7.79236	-2.59877e-05		-1.04985e-05		0.000447981		-0.000321794
15.6015	7.80077	-2.74382e-05		-1.36277e-05		0.000465999		-0.000304847
15.6184	7.80919	-2.85692e-05		-1.66472e-05		0.000482969		-0.000289235
15.6352	7.81761	-2.92432e-05		-1.95203e-05		0.00049891		-0.000274833
15.6521	7.82603	-2.93448e-05		-2.22136e-05		0.000513852		-0.000261515
15.6689	7.83444	-2.87798e-05		-2.47003e-05		0.000527824		-0.000249156
15.6857	7.84286	-2.74525e-05		-2.69631e-05		0.000540856		-0.000237645
15.7026	7.85128	-2.5268e-05		-2.89955e-05		0.000552976		-0.000226884
15.7194	7.8597	-2.2115e-05		-3.08042e-05		0.000564209		-0.000216791
15.7362	7.86811	-1.7855e-05		-3.24102e-05		0.000574572		-0.000207304
15.7531	7.87653	-1.23158e-05		-3.38458e-05		0.000584076		-0.000198378
15.7699	7.88495	-5.28541e-06		-3.51545e-05		0.000592724		-0.00018998
15.7867	7.89336	3.48547e-06		-3.63864e-05		0.000600503		-0.000182087
15.8036	7.90178	1.42779e-05		-3.75929e-05		0.000607378		-0.00017468
15.8204	7.9102	2.73836e-05		-3.88231e-05		0.000613291		-0.000167744
15.8372	7.91862	4.30764e-05		-4.01196e-05		0.000618157		-0.000161263
15.8541	7.92703	6.1581e-05		-4.15145e-05		0.000621858		-0.00015522
15.8709	7.93545	8.30284e-05		-4.30263e-05		0.000624254		-0.000149594
15.8877	7.94387	0.000107412		-4.46587e-05		0.000625185		-0.000144365
15.9046	7.95229	0.000134557		-4.64034e-05		0.000624479		-0.000139511
15.9214	7.9607	0.000164088		-4.82408e-05		0.000621972		-0.000135008
15.9382	7.96912	0.00019544		-5.01426e-05		0.00061752		-0.000130835
15.9551	7.97754	0.000227875		-5.2076e-05		0.000611016		-0.00012697
15.9719	7.98595	0.000260543		-5.40066e-05		0.000602407		-0.000123391
15.9887	7.99437	0.000292534		-5.59039e-05		0.000591703		-0.000120074
16.0056	8.00279	0.000322982		-5.77391e-05		0.000578983		-0.000116994
16.0224	8.01121	0.000351166		-5.94901e-05		0.000564392		-0.000114122
16.0392	8.01962	0.000376571		-6.11416e-05		0.000548133		-0.000111426
16.0561	8.02804	0.000398946		-6.26845e-05		0.000530458		-0.00010887
16.0729	8.03646	0.000418317		-6.41151e-05		0.000511645		-0.000106417
16.0898	8.04488	0.000434961		-6.54333e-05		0.000491982		-0.000104024
16.1066	8.05329	0.000449344		-6.66406e-05		0.000471759		-0.000101647
16.1234	8.06171	0.000462028		-6.774e-05		0.000451243		-9.92403e-05
16.1403	8.07013	0.000473581		-6.8729e-05		0.000430676		-9.67559e-05
16.1571	8.07854	0.000484481		-6.96035e-05		0.000410267		-9.41456e-05
16.1739	8.08696	0.000495048		-7.03563e-05		0.000390193		-9.13624e-05
16.1908	8.09538	0.000505409		-7.09777e-05		0.000370593		-8.83619e-05
16.2076	8.1038	0.000515501		-7.14576e-05		0.000351577		-8.5105e-05
16.2244	8.11221	0.000525117		-7.17862e-05		0.000333226		-8.15598e-05
16.2413	8.12063	0.000533968		-7.19568e-05		0.000315595		-7.77036e-05
16.2581	8.12905	0.000541777		-7.19679e-05		0.000298718		-7.35276e-05
16.2749	8.13747	0.000548353		-7.18224e-05		0.000282609		-6.90339e-05
16.2918	8.14588	0.000553664		-7.15296e-05		0.000267263		-6.42374e-05
16.3086	8.1543	0.000557866		-7.11017e-05		0.000252665		-5.91637e-05
16.3254	8.16272	0.000561315		-7.05557e-05		0.000238785		-5.38474e-05
16.3423	8.17113	0.000564517		-6.99099e-05		0.000225589		-4.83302e-05
16.3591	8.17955	0.000568068		-6.91816e-05		0.000213038		-4.26555e-05
16.3759	8.18797	0.000572562		-6.83811e-05		0.000201096		-3.68661e-05
16.3928	8.19639	0.000578501		-6.75125e-05		0.000189737		-3.10054e-05
16.4096	8.2048	0.000586224		-6.65731e-05		0.000178943		-2.51156e-05
16.4264	8.21322	0.000595843		-6.55534e-05		0.000168718		-1.92411e-05
16.4433	8.22164	0.000607227		-6.44374e-05		0.000159086		-1.34244e-05
16.4601	8.23006	0.000620021		-6.31996e-05		0.000150102		-7.71128e-06
16.4769	8.23847	0.000633695		-6.18134e-05		0.000141853		-2.15218e-06
16.4938	8.24689	0.000647638		-6.02511e-05		0.000134454		3.19837e-06
16.5106	8.25531	0.00066125		-5.84874e-05		0.000128055		8.28197e-06
16.5274	8.26372	0.00067405		-5.64997e-05		0.000122832		1.30386e-05
16.5443	8.27214	0.000685753		-5.42743e-05		0.000118983		1.74101e-05
16.5611	8.28056	0.000696328		-5.18021e-05		0.00011672		2.13442e-05
16.578	8.28898	0.000706023		-4.90819e-05		0.00011625		2.47987e-05
16.5948	8.29739	0.000715342		-4.61181e-05		0.000117771		2.77452e-05
16.6116	8.30581	0.000724988		-4.29255e-05		0.00012145		3.0172e-05
16.6285	8.31423	0.000735788		-3.95176e-05		0.000127411		3.20851e-05
16.6453	8.32265	0.000748604		-3.59133e-05		0.000135723		3.35071e-05
16.6621	8.33106	0.000764236		-3.21355e-05		0.00014639		3.4475e-05
16.679	8.33948	0.000783352		-2.82137e-05		0.000159346		3.50383e-05
16.6958	8.3479	0.000806428		-2.41857e-05		0.000174455		3.52545e-05
16.7126	8.35631	0.000833719		-2.00963e-05		0.00019151		3.51843e-05
16.7295	8.36473	0.000865248		-1.60007e-05		0.000210252		3.48877e-05
16.7463	8.37315	0.000900821		-1.19661e-05		0.000230377		3.44208e-05
16.7631	8.38157	0.000940061		-8.06922e-06		0.000251552		3.38327e-05
16.78	8.38998	0.000982449		-4.40068e-06		0.000273438		3.31648e-05
16.7968	8.3984	0.00102737		-1.05403e-06		0.000295701		3.24501e-05
16.8136	8.40682	0.00107417		1.87661e-06		0.000318038		3.17117e-05
16.8305	8.41524	0.00112216		4.30305e-06		0.000340176		3.09677e-05
16.8473	8.42365	0.00117072		6.15117e-06		0.000361892		3.02324e-05
16.8641	8.43207	0.00121926		7.3677e-06		0.000383009		2.95186e-05
16.881	8.44049	0.00126724		7.92664e-06		0.000403397		2.88382e-05
16.8978	8.4489	0.00131425		7.83252e-06		0.000422974		2.8204e-05
16.9146	8.45732	0.00135992		7.12134e-06		0.000441691		2.76305e-05
16.9315	8.46574	0.001404		5.86189e-06		0.000459531		2.7132e-05
16.9483	8.47416	0.00144628		4.14722e-06		0.000476502		2.67231e-05
16.9651	8.48257	0.00148666		2.08949e-06		0.00049262		2.64157e-05
16.982	8.49099	0.00152509		-1.89068e-07		0.000507912		2.62161e-05
16.9988	8.49941	0.0015616		-2.56591e-06		0.000522403		2.61253e-05
17.0157	8.50783	0.00159627		-4.92341e-06		0.000536114		2.6136e-05
17.0325	8.51624	0.00162922		-7.16046e-06		0.000549062		2.62327e-05
17.0493	8.52466	0.00166063		-9.1969e-06		0.000561257		2.63918e-05
17.0662	8.53308	0.00169069		-1.09789e-05		0.000572708		2.65831e-05
17.083	8.54149	0.00171962		-1.24796e-05		0.000583419		2.67716e-05
17.0998	8.54991	0.00174762		-1.36949e-05		0.000593399		2.69196e-05
17.1167	8.55833	0.00177491		-1.46426e-05		0.000602661		2.69935e-05
17.1335	8.56675	0.00180164		-1.53572e-05		0.000611227		2.69634e-05
17.1503	8.57516	0.00182797		-1.58808e-05		0.000619129		2.68066e-05
17.1672	8.58358	0.00185399		-1.62555e-05		0.000626407		2.65113e-05
17.184	8.592	0.00187978		-1.65145e-05		0.000633114		2.60748e-05
17.2008	8.60042	0.00190536		-1.66713e-05		0.00063931		2.55081e-05
17.2177	8.60883	0.00193072		-1.67127e-05		0.000645057		2.48335e-05
17.2345	8.61725	0.00195584		-1.65921e-05		0.00065042		2.40851e-05
17.2513	8.62567	0.00198066		-1.62235e-05		0.00065546		2.33027e-05
17.2682	8.63408	0.00200513		-1.54781e-05		0.000660227		2.25327e-05
17.285	8.6425	0.00202922		-1.41825e-05		0.000664759		2.18255e-05
17.3018	8.65092	0.00205286		-1.21206e-05		0.000669074		2.1229e-05
17.3187	8.65934	0.00207603		-9.03797e-06		0.000673165		2.07868e-05
17.3355	8.66775	0.00209872		-4.65006e-06		0.000677004		2.05335e-05
17.3523	8.67617	0.00212093		1.34361e-06		0.000680528		2.04951e-05
17.3692	8.68459	0.00214264		9.24267e-06		0.000683641		2.06869e-05
17.386	8.69301	0.00216389		1.93231e-05		0.000686209		2.1113e-05
17.4028	8.70142	0.00218467		3.18128e-05		0.00068806		2.1769e-05
17.4197	8.70984	0.00220497		4.68635e-05		0.000688984		2.26425e-05
17.4365	8.71826	0.00222478		6.453e-05		0.000688738		2.37153e-05
17.4534	8.72668	0.00224407		8.47474e-05		0.000687057		2.49635e-05
17.4702	8.73509	0.00226277		0.000107316		0.000683664		2.63623e-05
17.487	8.74351	0.0022808		0.0001319		0.000678288		2.78836e-05
17.5039	8.75193	0.00229808		0.000158026		0.000670683		2.9496e-05
17.5207	8.76034	0.00231447		0.000185104		0.000660655		3.11629e-05
17.5375	8.76876	0.00232986		0.000212458		0.000648078		3.28344e-05
17.5544	8.77718	0.00234415		0.000239356		0.00063291		3.44703e-05
17.5712	8.7856	0.00235723		0.000265052		0.000615195		3.60383e-05
17.588	8.79401	0.00236903		0.000288829		0.000595089		3.74928e-05
17.6049	8.80243	0.00237953		0.000310038		0.000572836		3.87911e-05
17.6217	8.81085	0.00238874		0.000328135		0.000548757		3.98951e-05
17.6385	8.81927	0.00239676		0.000342709		0.000523232		4.0773e-05
17.6554	8.82768	0.00240371		0.000353498		0.000496669		4.14031e-05
17.6722	8.8361	0.00240982		0.000360401		0.000469484		4.17721e-05
17.689	8.84452	0.00241532		0.000363473		0.000442078		4.1875e-05
17.7059	8.85293	0.0024205		0.000362913		0.000414817		4.17105e-05
17.7227	8.86135	0.00242567		0.000359035		0.000388018		4.12804e-05
17.7395	8.86977	0.0024311		0.000352249		0.000361944		4.05846e-05
17.7564	8.87819	0.00243706		0.000343018		0.000336798		3.9618e-05
17.7732	8.8866	0.00244377		0.00033183		0.000312728		3.8368e-05
17.79	8.89502	0.00245137		0.000319168		0.000289828		3.68138e-05
17.8069	8.90344	0.00245994		0.000305481		0.000268152		3.49291e-05
17.8237	8.91186	0.00246947		0.000291175		0.000247715		3.26845e-05
17.8405	8.92027	0.00247992		0.000276601		0.000228499		3.00531e-05
17.8574	8.92869	0.00249114		0.000262053		0.000210469		2.70136e-05
17.8742	8.93711	0.00250296		0.000247769		0.000193567		2.35544e-05
17.891	8.94552	0.00251519		0.000233938		0.000177726		1.96782e-05
17.9079	8.95394	0.00252763		0.000220708		0.000162867		1.54031e-05
17.9247	8.96236	0.00254007		0.000208187		0.00014891		1.07655e-05
17.9416	8.97078	0.00255235		0.000196455		0.000135768		5.81687e-06
17.9584	8.97919	0.00256432		0.000185567		0.000123358		6.19525e-07
17.9752	8.98761	0.00257587		0.000175554		0.000111601		-4.75762e-06
17.9921	8.99603	0.00258692		0.000166424		0.000100423		-1.0245e-05
18.0089	9.00445	0.0025974		0.000158164		8.97576e-05		-1.57729e-05
18.0257	9.01286	0.00260727		0.00015074		7.95524e-05		-2.12782e-05
18.0426	9.02128	0.00261649		0.000144096		6.97646e-05		-2.67075e-05
18.0594	9.0297	0.00262504		0.000138161		6.03638e-05		-3.20169e-05
18.0762	9.03811	0.00263288		0.000132843		5.13319e-05		-3.71768e-05
18.0931	9.04653	0.00263998		0.00012804		4.26613e-05		-4.21706e-05
18.1099	9.05495	0.0026463		0.000123642		3.43548e-05		-4.69975e-05
18.1267	9.06337	0.00265181		0.000119531		2.64223e-05		-5.16765e-05
18.1436	9.07178	0.00265647		0.000115594		1.88817e-05		-5.6248e-05
18.1604	9.0802	0.00266026		0.000111724		1.17542e-05		-6.07781e-05
18.1772	9.08862	0.00266316		0.000107825		5.06323e-06		-6.53627e-05
18.1941	9.09704	0.00266516		0.00010382		-1.16838e-06		-7.01313e-05
18.2109	9.10545	0.00266631		9.96463e-05		-6.91993e-06		-7.52473e-05
18.2277	9.11387	0.00266667		9.52692e-05		-1.21749e-05		-8.09033e-05
18.2446	9.12229	0.00266632		9.06746e-05		-1.69129e-05		-8.73137e-05
18.2614	9.1307	0.00266535		8.58705e-05		-2.11287e-05		-9.47022e-05
18.2782	9.13912	0.00266388		8.08867e-05		-2.48295e-05		-0.000103281
18.2951	9.14754	0.00266207		7.57661e-05		-2.80181e-05		-0.000113232
18.3119	9.15596	0.00266001		7.05629e-05		-3.07001e-05		-0.000124681
18.3287	9.16437	0.00265784		6.53397e-05		-3.28838e-05		-0.000137664
18.3456	9.17279	0.00265568		6.016e-05		-3.45802e-05		-0.00015212
18.3624	9.18121	0.00265363		5.50816e-05		-3.58028e-05		-0.000167874
18.3793	9.18963	0.00265183		5.01534e-05		-3.65707e-05		-0.000184639
18.3961	9.19804	0.00265036		4.54121e-05		-3.69113e-05		-0.000202031
18.4129	9.20646	0.00264931		4.08803e-05		-3.68615e-05		-0.000219595
18.4298	9.21488	0.00264875		3.65652e-05		-3.64692e-05		-0.00023685
18.4466	9.22329	0.00264872		3.2462e-05		-3.57973e-05		-0.00025333
18.4634	9.23171	0.0026493		2.85547e-05		-3.49222e-05		-0.000268638
18.4803	9.24013	0.00265055		2.48185e-05		-3.39292e-05		-0.000282489
18.4971	9.24855	0.00265247		2.12233e-05		-3.29082e-05		-0.000294744
18.5139	9.25696	0.00265507		1.77371e-05		-3.19498e-05		-0.000305424
18.5308	9.26538	0.00265834		1.43317e-05		-3.11394e-05		-0.000314718
18.5476	9.2738	0.00266219		1.09807e-05		-3.05513e-05		-0.000322964
18.5644	9.28222	0.00266654		7.66344e-06		-3.0243e-05		-0.000330612
18.5813	9.29063	0.00267129		4.36706e-06		-3.02539e-05		-0.000338188
18.5981	9.29905	0.00267628		1.08156e-06		-3.06031e-05		-0.000346234
18.6149	9.30747	0.00268139		-2.19634e-06		-3.12908e-05		-0.000355267
18.6318	9.31588	0.00268644		-5.46455e-06		-3.22992e-05		-0.000365724
18.6486	9.3243	0.00269129		-8.71675e-06		-3.35962e-05		-0.000377933
18.6654	9.33272	0.00269581		-1.19496e-05		-3.51411e-05		-0.000392085
18.6823	9.34114	0.00269985		-1.5163e-05		-3.68833e-05		-0.00040822
18.6991	9.34955	0.00270331		-1.8363e-05		-3.87705e-05		-0.000426238
18.7159	9.35797	0.00270615		-2.15642e-05		-4.07521e-05		-0.000445912
18.7328	9.36639	0.00270833		-2.47893e-05		-4.27804e-05		-0.000466915
18.7496	9.37481	0.00270986		-2.80645e-05		-4.48186e-05		-0.000488855
18.7664	9.38322	0.00271077		-3.1421e-05		-4.68382e-05		-0.000511315
18.7833	9.39164	0.00271108		-3.48921e-05		-4.88197e-05		-0.000533886
18.8001	9.40006	0.00271086		-3.85064e-05		-5.07533e-05		-0.000556201
18.8169	9.40847	0.00271013		-4.22871e-05		-5.26366e-05		-0.000577954
18.8338	9.41689	0.00270891		-4.62487e-05		-5.44717e-05		-0.00059892
18.8506	9.42531	0.00270723		-5.03944e-05		-5.62645e-05		-0.000618951
18.8675	9.43373	0.00270508		-5.47152e-05		-5.80161e-05		-0.00063798
18.8843	9.44214	0.00270247		-5.9189e-05		-5.97312e-05		-0.000655997
18.9011	9.45056	0.00269941		-6.37824e-05		-6.13907e-05		-0.000673039
18.918	9.45898	0.00269588		-6.84496e-05		-6.29745e-05		-0.000689158
18.9348	9.4674	0.00269186		-7.31352e-05		-6.44574e-05		-0.000704402
18.9516	9.47581	0.00268734		-7.77757e-05		-6.58146e-05		-0.00071879
18.9685	9.48423	0.00268237		-8.23026e-05		-6.7018e-05		-0.000732288
18.9853	9.49265	0.00267705		-8.66442e-05		-6.80244e-05		-0.000744807
19.0021	9.50106	0.00267147		-9.07275e-05		-6.88043e-05		-0.000756191
19.019	9.50948	0.00266582		-9.44856e-05		-6.93347e-05		-0.000766229
19.0358	9.5179	0.00266028		-9.78534e-05		-6.95992e-05		-0.000774673
19.0526	9.52632	0.0026551		-0.000100772		-6.95909e-05		-0.000781254
19.0695	9.53473	0.00265055		-0.000103193		-6.93092e-05		-0.000785718
19.0863	9.54315	0.00264687		-0.00010508		-6.87605e-05		-0.000787856
19.1031	9.55157	0.00264431		-0.00010641		-6.79573e-05		-0.000787538
19.12	9.55999	0.00264305		-0.000107169		-6.69163e-05		-0.000784735
19.1368	9.5684	0.00264321		-0.000107362		-6.5659e-05		-0.00077954
19.1536	9.57682	0.00264484		-0.000107007		-6.42097e-05		-0.000772174
19.1705	9.58524	0.00264789		-0.000106133		-6.25983e-05		-0.000762984
19.1873	9.59365	0.00265224		-0.00010478		-6.08566e-05		-0.000752431
19.2041	9.60207	0.00265769		-0.000102999		-5.90198e-05		-0.000741061
19.221	9.61049	0.002664		-0.000100848		-5.71258e-05		-0.000729471
19.2378	9.61891	0.00267088		-9.83938e-05		-5.52125e-05		-0.000718269
19.2546	9.62732	0.00267802		-9.57014e-05		-5.33177e-05		-0.000708033
19.2715	9.63574	0.00268516		-9.28387e-05		-5.14775e-05		-0.00069926
19.2883	9.64416	0.00269204		-8.98707e-05		-4.97243e-05		-0.000692331
19.3052	9.65258	0.00269848		-8.68579e-05		-4.80847e-05		-0.000687475
19.322	9.66099	0.00270435		-8.38537e-05		-4.65778e-05		-0.00068475
19.3388	9.66941	0.00270956		-8.0901e-05		-4.52154e-05		-0.000684027
19.3557	9.67783	0.0027141		-7.80322e-05		-4.40012e-05		-0.000685004
19.3725	9.68624	0.00271801		-7.52659e-05		-4.29298e-05		-0.00068722
19.3893	9.69466	0.00272134		-7.26114e-05		-4.19877e-05		-0.000690091
19.4062	9.70308	0.00272417		-7.00678e-05		-4.11532e-05		-0.00069296
19.423	9.7115	0.0027266		-6.76278e-05		-4.03962e-05		-0.000695142
19.4398	9.71991	0.00272871		-6.52792e-05		-3.96839e-05		-0.000695983
19.4567	9.72833	0.0027306		-6.30073e-05		-3.89786e-05		-0.000694906
19.4735	9.73675	0.00273234		-6.0799e-05		-3.82411e-05		-0.000691454
19.4903	9.74517	0.002734		-5.86448e-05		-3.74331e-05		-0.00068531
19.5072	9.75358	0.00273565		-5.654e-05		-3.65205e-05		-0.000676316
19.524	9.762	0.00273734		-5.44826e-05		-3.54763e-05		-0.000664474
19.5408	9.77042	0.00273913		-5.24775e-05		-3.42814e-05		-0.000649926
19.5577	9.77883	0.00274107		-5.05326e-05		-3.29244e-05		-0.000632941
19.5745	9.78725	0.0027432		-4.86507e-05		-3.14031e-05		-0.00061387
19.5913	9.79567	0.00274553		-4.68304e-05		-2.97228e-05		-0.000593127
19.6082	9.80409	0.00274809		-4.5064e-05		-2.78959e-05		-0.00057115
19.625	9.8125	0.00275084		-4.33356e-05		-2.594e-05		-0.000548375
19.6418	9.82092	0.00275374		-4.16207e-05		-2.38766e-05		-0.000525214
19.6587	9.82934	0.0027567		-3.98862e-05		-2.17307e-05		-0.00050203
19.6755	9.83776	0.00275961		-3.80959e-05		-1.95295e-05		-0.000479135
19.6923	9.84617	0.00276233		-3.62088e-05		-1.73027e-05		-0.000456777
19.7092	9.85459	0.00276469		-3.41913e-05		-1.50816e-05		-0.000435144
19.726	9.86301	0.00276653		-3.20125e-05		-1.28984e-05		-0.000414364
19.7428	9.87142	0.00276768		-2.96461e-05		-1.07841e-05		-0.000394513
19.7597	9.87984	0.00276801		-2.70765e-05		-8.76636e-06		-0.000375626
19.7765	9.88826	0.00276743		-2.43056e-05		-6.86849e-06		-0.000357699
19.7934	9.89668	0.00276589		-2.13525e-05		-5.10589e-06		-0.000340703
19.8102	9.90509	0.0027634		-1.82489e-05		-3.48316e-06		-0.000324594
19.827	9.91351	0.00276005		-1.50335e-05		-1.99473e-06		-0.00030932
19.8439	9.92193	0.00275596		-1.17574e-05		-6.35722e-07		-0.000294826
19.8607	9.93035	0.0027513		-8.46968e-06		6.0297e-07		-0.000281061
19.8775	9.93876	0.00274628		-5.21396e-06		1.74173e-06		-0.000267977
19.8944	9.94718	0.00274109		-2.0259e-06		2.80015e-06		-0.000255533
19.9112	9.9556	0.00273595		1.06544e-06		3.79619e-06		-0.000243694
19.928	9.96401	0.00273104		4.05112e-06		4.74259e-06		-0.000232428
19.9449	9.97243	0.0027265		6.91835e-06		5.6455e-06		-0.000221711
19.9617	9.98085	0.00272243		9.64704e-06		6.50367e-06		-0.000211522
19.9785	9.98927	0.00271891		1.22316e-05		7.30873e-06		-0.000201843
19.9954	9.99768	0.00271595		1.46686e-05		8.04665e-06		-0.000192655
20.0122	10.0061	0.00271356		1.6951e-05		8.7005e-06		-0.000183945
20.029	10.0145	0.0027117		1.9068e-05		9.25267e-06		-0.000175697
20.0459	10.0229	0.00271033		2.10034e-05		9.68788e-06		-0.000167897
20.0627	10.0314	0.00270942		2.27367e-05		9.99442e-06		-0.000160531
20.0795	10.0398	0.00270892		2.42448e-05		1.0166e-05		-0.000153585
20.0964	10.0482	0.00270879		2.55045e-05		1.02021e-05		-0.000147042
20.1132	10.0566	0.00270901		2.64942e-05		1.01075e-05		-0.000140884
20.13	10.065	0.00270956		2.71965e-05		9.89339e-06		-0.00013509
20.1469	10.0734	0.0027104		2.76001e-05		9.57454e-06		-0.00012964
20.1637	10.0819	0.00271152		2.77026e-05		9.16839e-06		-0.000124514
20.1805	10.0903	0.00271288		2.75114e-05		8.69383e-06		-0.000119696
20.1974	10.0987	0.00271444		2.70438e-05		8.1705e-06		-0.000115168
20.2142	10.1071	0.00271617		2.6333e-05		7.61721e-06		-0.000110919
20.2311	10.1155	0.002718		2.54256e-05		7.05146e-06		-0.00010693
20.2479	10.1239	0.0027199		2.43815e-05		6.48899e-06		-0.000103187
20.2647	10.1324	0.0027218		2.32721e-05		5.94429e-06		-9.96659e-05
20.2816	10.1408	0.00272363		2.21773e-05		5.4295e-06		-9.63394e-05
20.2984	10.1492	0.00272532		2.1182e-05		4.9542e-06		-9.3171e-05
20.3152	10.1576	0.00272678		2.037e-05		4.52918e-06		-9.01145e-05
20.3321	10.166	0.00272791		1.98186e-05		4.16486e-06		-8.71176e-05
20.3489	10.1744	0.00272861		1.95904e-05		3.87189e-06		-8.4119e-05
20.3657	10.1829	0.00272877		1.97296e-05		3.66205e-06		-8.10546e-05
20.3826	10.1913	0.00272827		2.02574e-05		3.54553e-06		-7.78621e-05
20.3994	10.1997	0.00272701		2.11717e-05		3.53324e-06		-7.44852e-05
20.4162	10.2081	0.0027249		2.24449e-05		3.63415e-06		-7.08801e-05
20.4331	10.2165	0.00272192		2.40318e-05		3.85369e-06		-6.70215e-05
20.4499	10.225	0.00271803		2.58699e-05		4.19263e-06		-6.29021e-05
20.4667	10.2334	0.00271328		2.78864e-05		4.64401e-06		-5.85346e-05
20.4836	10.2418	0.00270773		3.00036e-05		5.19301e-06		-5.3954e-05
20.5004	10.2502	0.0027015		3.21436e-05		5.81509e-06		-4.92127e-05
20.5172	10.2586	0.00269472		3.42352e-05		6.47992e-06		-4.43778e-05
20.5341	10.267	0.00268755		3.6215e-05		7.14938e-06		-3.95226e-05
20.5509	10.2755	0.00268013		3.80316e-05		7.78092e-06		-3.47223e-05
20.5677	10.2839	0.00267263		3.96468e-05		8.3306e-06		-3.00457e-05
20.5846	10.2923	0.00266518		4.10345e-05		8.75569e-06		-2.55551e-05
20.6014	10.3007	0.00265788		4.21784e-05		9.01876e-06		-2.12943e-05
20.6182	10.3091	0.00265083		4.3072e-05		9.09162e-06		-1.7294e-05
20.6351	10.3175	0.00264409		4.37163e-05		8.95448e-06		-1.35649e-05
20.6519	10.326	0.00263773		4.41149e-05		8.59994e-06		-1.00999e-05
20.6688	10.3344	0.00263178		4.42719e-05		8.03336e-06		-6.89863e-06
20.6856	10.3428	0.00262627		4.41883e-05		7.26883e-06		-3.93981e-06
20.7024	10.3512	0.00262121		4.38643e-05		6.32961e-06		-1.19613e-06
20.7193	10.3596	0.00261661		4.32954e-05		5.24594e-06		1.35944e-06
20.7361	10.368	0.00261249		4.24752e-05		4.04806e-06		3.74352e-06
20.7529	10.3765	0.00260884		4.13985e-05		2.76475e-06		5.99168e-06
20.7698	10.3849	0.00260566		4.00615e-05		1.42034e-06		8.1311e-06
20.7866	10.3933	0.00260291		3.84669e-05		3.46738e-08		1.01861e-05
20.8034	10.4017	0.00260057		3.66319e-05		-1.3805e-06		1.21741e-05
20.8203	10.4101	0.0025986		3.45877e-05		-2.82044e-06		1.41154e-05
20.8371	10.4185	0.00259695		3.23816e-05		-4.28354e-06		1.60142e-05
20.8539	10.427	0.00259556		3.00773e-05		-5.77123e-06		1.78786e-05
20.8708	10.4354	0.00259438		2.77547e-05		-7.28544e-06		1.97237e-05
20.8876	10.4438	0.00259334		2.55056e-05		-8.82717e-06		2.15559e-05
20.9044	10.4522	0.00259239		2.3431e-05		-1.0395e-05		2.33807e-05
20.9213	10.4606	0.00259146		2.16328e-05		-1.19831e-05		2.52119e-05
20.9381	10.4691	0.00259053		2.02098e-05		-1.35808e-05		2.70485e-05
20.9549	10.4775	0.00258952		1.92516e-05		-1.51726e-05		2.88843e-05
20.9718	10.4859	0.00258842		1.88261e-05		-1.67379e-05		3.07266e-05
20.9886	10.4943	0.00258718		1.8975e-05		-1.82541e-05		3.25861e-05
21.0054	10.5027	0.00258579		1.97064e-05		-1.96961e-05		3.44797e-05
21.0223	10.5111	0.00258423		2.09966e-05		-2.10379e-05		3.64313e-05
21.0391	10.5196	0.00258249		2.27873e-05		-2.22541e-05		3.84669e-05
21.0559	10.528	0.00258058		2.49862e-05		-2.33205e-05		4.06133e-05
21.0728	10.5364	0.00257851		2.74748e-05		-2.42155e-05		4.28936e-05
21.0896	10.5448	0.00257628		3.01068e-05		-2.49201e-05		4.53238e-05
21.1064	10.5532	0.00257392		3.27278e-05		-2.54181e-05		4.79072e-05
21.1233	10.5616	0.00257144		3.51768e-05		-2.56955e-05		5.06247e-05
21.1401	10.5701	0.00256885		3.72977e-05		-2.5739e-05		5.34484e-05
21.157	10.5785	0.00256617		3.89464e-05		-2.55384e-05		5.63361e-05
21.1738	10.5869	0.0025634		4e-05		-2.50846e-05		5.92251e-05
21.1906	10.5953	0.00256056		4.03646e-05		-2.43689e-05		6.20448e-05
21.2075	10.6037	0.00255767		3.99803e-05		-2.33853e-05		6.4709e-05
21.2243	10.6121	0.00255476		3.88214e-05		-2.21318e-05		6.71428e-05
21.2411	10.6206	0.00255187		3.68994e-05		-2.06115e-05		6.92756e-05
21.258	10.629	0.00254908		3.42585e-05		-1.88339e-05		7.10524e-05
21.2748	10.6374	0.00254645		3.0974e-05		-1.68155e-05		7.24229e-05
21.2916	10.6458	0.00254407		2.71489e-05		-1.45803e-05		7.33546e-05
21.3085	10.6542	0.002542		2.29042e-05		-1.21603e-05		7.38293e-05
21.3253	10.6626	0.00254033		1.83706e-05		-9.59291e-06		7.3841e-05
21.3421	10.6711	0.00253909		1.36802e-05		-6.91898e-06		7.33921e-05
21.359	10.6795	0.00253833		8.96002e-06		-4.1795e-06		7.24871e-05
21.3758	10.6879	0.00253804		4.32621e-06		-1.41247e-06		7.11416e-05
21.3926	10.6963	0.0025382		-1.21035e-07		1.34999e-06		6.93754e-05
21.4095	10.7047	0.00253875		-4.29774e-06		4.08232e-06		6.72078e-05
21.4263	10.7132	0.00253962		-8.13993e-06		6.76901e-06		6.46781e-05
21.4431	10.7216	0.00254071		-1.16047e-05		9.40236e-06		6.18197e-05
21.46	10.73	0.00254194		-1.46692e-05		1.198e-05		5.86714e-05
21.4768	10.7384	0.00254318		-1.73285e-05		1.45065e-05		5.52757e-05
21.4936	10.7468	0.00254436		-1.9593e-05		1.69872e-05		5.16659e-05
21.5105	10.7552	0.00254538		-2.14868e-05		1.94268e-05		4.78891e-05
21.5273	10.7637	0.0025462		-2.30449e-05		2.18283e-05		4.39903e-05
21.5441	10.7721	0.00254682		-2.43107e-05		2.41899e-05		4.00151e-05
21.561	10.7805	0.00254727		-2.53282e-05		2.65064e-05		3.60075e-05
21.5778	10.7889	0.00254767		-2.6142e-05		2.87697e-05		3.2017e-05
21.5947	10.7973	0.00254825		-2.67935e-05		3.09682e-05		2.8107e-05
21.6115	10.8057	0.00254934		-2.7318e-05		3.30887e-05		2.43309e-05
21.6283	10.8142	0.00255139		-2.77443e-05		3.51208e-05		2.07651e-05
21.6452	10.8226	0.00255498		-2.80937e-05		3.70547e-05		1.7512e-05
21.662	10.831	0.00256083		-2.83796e-05		3.88826e-05		1.47006e-05
21.6788	10.8394	0.00256974		-2.86174e-05		4.05995e-05		1.24904e-05
21.6957	10.8478	0.00258261		-2.88166e-05		4.22041e-05		1.10764e-05
21.7125	10.8562	0.00260032		-2.89893e-05		4.3695e-05		1.06865e-05
21.7293	10.8647	0.00262374		-2.91523e-05		4.5072e-05		1.15689e-05
21.7462	10.8731	0.0026536		-2.93271e-05		4.63364e-05		1.40096e-05
21.763	10.8815	0.00269046		-2.95403e-05		4.74908e-05		1.8298e-05
21.7798	10.8899	0.00273462		-2.98213e-05		4.85371e-05		2.47206e-05
21.7967	10.8983	0.00278609		-3.02e-05		4.94764e-05		3.35254e-05
21.8135	10.9068	0.00284456		-3.06995e-05		5.03109e-05		4.49228e-05
21.8303	10.9152	0.0029094		-3.13383e-05		5.10433e-05		5.90522e-05
21.8472	10.9236	0.00297974		-3.21248e-05		5.16762e-05		7.59747e-05
21.864	10.932	0.00305444		-3.3058e-05		5.22117e-05		9.5669e-05
21.8808	10.9404	0.00313227		-3.41298e-05		5.26522e-05		0.000118039
21.8977	10.9488	0.00321191		-3.5322e-05		5.29972e-05		0.000142928
21.9145	10.9573	0.00329211		-3.66145e-05		5.32435e-05		0.000170137
21.9313	10.9657	0.00337171		-3.79877e-05		5.3385e-05		0.000199458
21.9482	10.9741	0.00344973		-3.94267e-05		5.34118e-05		0.0002307
21.965	10.9825	0.00352538		-4.09226e-05		5.33086e-05		0.000263717
21.9818	10.9909	0.00359808		-4.24765e-05		5.30556e-05		0.000298425
21.9987	10.9993	0.00366746		-4.40959e-05		5.26282e-05		0.000334815
22.0155	11.0078	0.00373335		-4.57933e-05		5.1999e-05		0.000372947
22.0323	11.0162	0.00379573		-4.75843e-05		5.11395e-05		0.000412941
22.0492	11.0246	0.00385469		-4.94842e-05		5.00224e-05		0.00045496
22.066	11.033	0.00391044		-5.15043e-05		4.86241e-05		0.00049919
22.0829	11.0414	0.00396323		-5.36483e-05		4.69255e-05		0.000545815
22.0997	11.0498	0.00401333		-5.59125e-05		4.49148e-05		0.000595002
22.1165	11.0583	0.00406101		-5.82832e-05		4.25879e-05		0.000646891
22.1334	11.0667	0.00410652		-6.0736e-05		3.99493e-05		0.000701587
22.1502	11.0751	0.0041501		-6.32386e-05		3.70118e-05		0.000759169
22.167	11.0835	0.00419194		-6.57506e-05		3.37967e-05		0.000819693
22.1839	11.0919	0.00423217		-6.82239e-05		3.03312e-05		0.000883211
22.2007	11.1003	0.00427093		-7.06051e-05		2.66526e-05		0.000949777
22.2175	11.1088	0.00430827		-7.28383e-05		2.28029e-05		0.00101946
22.2344	11.1172	0.00434424		-7.48677e-05		1.88296e-05		0.00109234
22.2512	11.1256	0.00437886		-7.6643e-05		1.47839e-05		0.00116851
22.268	11.134	0.00441212		-7.81173e-05		1.07207e-05		0.00124809
22.2849	11.1424	0.00444401		-7.92545e-05		6.69645e-06		0.00133119
22.3017	11.1509	0.0044745		-8.00299e-05		2.76894e-06		0.00141791
22.3185	11.1593	0.00450359		-8.04325e-05		-1.00592e-06		0.00150835
22.3354	11.1677	0.00453127		-8.04657e-05		-4.57365e-06		0.00160256
22.3522	11.1761	0.00455757		-8.01479e-05		-7.8822e-06		0.0017006
22.369	11.1845	0.00458258		-7.9512e-05		-1.08861e-05		0.00180247
22.3859	11.1929	0.00460643		-7.86031e-05		-1.35445e-05		0.00190816
22.4027	11.2014	0.00462939		-7.74795e-05		-1.58225e-05		0.00201762
22.4195	11.2098	0.0046518		-7.62094e-05		-1.76941e-05		0.0021308
22.4364	11.2182	0.00467416		-7.48628e-05		-1.91433e-05		0.00224763
22.4532	11.2266	0.00469708		-7.35112e-05		-2.01643e-05		0.00236804
22.47	11.235	0.00472128		-7.22226e-05		-2.07664e-05		0.00249196
22.4869	11.2434	0.00474761		-7.10558e-05		-2.09688e-05		0.00261935
22.5037	11.2519	0.00477694		-7.00569e-05		-2.08037e-05		0.00275013
22.5206	11.2603	0.00481016		-6.92523e-05		-2.03148e-05		0.00288428
22.5374	11.2687	0.00484808		-6.86451e-05		-1.95542e-05		0.00302175
22.5542	11.2771	0.00489139		-6.82141e-05		-1.858e-05		0.0031625
22.5711	11.2855	0.00494057		-6.79163e-05		-1.74529e-05		0.00330649
22.5879	11.2939	0.00499586		-6.76855e-05		-1.62297e-05		0.00345365
22.6047	11.3024	0.00505723		-6.74377e-05		-1.49633e-05		0.00360391
22.6216	11.3108	0.00512432		-6.70812e-05		-1.36974e-05		0.00375717
22.6384	11.3192	0.00519655		-6.6523e-05		-1.24659e-05		0.00391329
22.6552	11.3276	0.00527308		-6.56736e-05		-1.1292e-05		0.00407209
22.6721	11.336	0.00535292		-6.44577e-05		-1.01852e-05		0.00423336
22.6889	11.3444	0.005435		-6.28192e-05		-9.14376e-06		0.00439687
22.7057	11.3529	0.00551822		-6.07255e-05		-8.15448e-06		0.00456235
22.7226	11.3613	0.00560153		-5.81685e-05		-7.19288e-06		0.00472951
22.7394	11.3697	0.005684		-5.51645e-05		-6.2236e-06		0.00489805
22.7562	11.3781	0.00576482		-5.17517e-05		-5.20015e-06		0.00506768
22.7731	11.3865	0.00584334		-4.79864e-05		-4.06297e-06		0.0052381
22.7899	11.395	0.0059191		-4.39398e-05		-2.73943e-06		0.00540905
22.8067	11.4034	0.00599178		-3.96886e-05		-1.1398e-06		0.00558028
22.8236	11.4118	0.0060612		-3.53148e-05		8.43551e-07		0.00575154
22.8404	11.4202	0.00612732		-3.08993e-05		3.33929e-06		0.00592264
22.8572	11.4286	0.00619019		-2.65178e-05		6.4988e-06		0.00609337
22.8741	11.437	0.00624992		-2.22383e-05		1.04967e-05		0.00626354
22.8909	11.4455	0.00630671		-1.81158e-05		1.55297e-05		0.00643297
22.9077	11.4539	0.00636079		-1.41908e-05		2.18083e-05		0.00660149
22.9246	11.4623	0.00641241		-1.04897e-05		2.9551e-05		0.0067689
22.9414	11.4707	0.00646189		-7.01975e-06		3.89702e-05		0.00693501
22.9582	11.4791	0.00650958		-3.77376e-06		5.02548e-05		0.00709964
22.9751	11.4875	0.00655588		-7.29004e-07		6.35533e-05		0.00726257
22.9919	11.496	0.00660127		2.14723e-06		7.89562e-05		0.00742362
23.0088	11.5044	0.0066463		4.89588e-06		9.64786e-05		0.00758254
23.0256	11.5128	0.0066916		7.5617e-06		0.000116056		0.00773913
23.0424	11.5212	0.0067379		1.0187e-05		0.000137538		0.00789313
23.0593	11.5296	0.00678595		1.28109e-05		0.000160694		0.00804427
23.0761	11.538	0.00683656		1.54649e-05		0.000185226		0.00819228
23.0929	11.5465	0.00689051		1.81699e-05		0.000210788		0.00833684
23.1098	11.5549	0.00694848		2.09349e-05		0.000237015		0.00847765
23.1266	11.5633	0.00701106		2.37577e-05		0.000263542		0.00861439
23.1434	11.5717	0.00707863		2.66223e-05		0.000290027		0.00874676
23.1603	11.5801	0.00715135		2.95055e-05		0.000316172		0.00887449
23.1771	11.5885	0.00722913		3.23774e-05		0.000341729		0.00899736
23.1939	11.597	0.00731168		3.52067e-05		0.000366512		0.00911519
23.2108	11.6054	0.00739847		3.79624e-05		0.000390389		0.00922788
23.2276	11.6138	0.00748885		4.06194e-05		0.000413282		0.00933537
23.2444	11.6222	0.00758213		4.31618e-05		0.000435151		0.00943767
23.2613	11.6306	0.00767761		4.55803e-05		0.000455992		0.00953484
23.2781	11.6391	0.00777471		4.7879e-05		0.000475819		0.00962698
23.2949	11.6475	0.00787301		5.00668e-05		0.000494656		0.0097142
23.3118	11.6559	0.00797231		5.21597e-05		0.000512529		0.00979664
23.3286	11.6643	0.00807265		5.41775e-05		0.000529456		0.00987443
23.3454	11.6727	0.00817427		5.61381e-05		0.000545441		0.00994771
23.3623	11.6811	0.0082776		5.80569e-05		0.000560467		0.0100166
23.3791	11.6896	0.00838321		5.99421e-05		0.000574492		0.0100811
23.3959	11.698	0.00849171		6.17954e-05		0.000587446		0.0101413
23.4128	11.7064	0.00860374		6.36116e-05		0.000599224		0.0101971
23.4296	11.7148	0.00871987		6.53786e-05		0.000609691		0.0102486
23.4465	11.7232	0.00884058		6.70803e-05		0.000618678		0.0102956
23.4633	11.7316	0.00896622		6.86979e-05		0.000625992		0.010338
23.4801	11.7401	0.00909705		7.02133e-05		0.000631425		0.0103755
23.497	11.7485	0.00923324		7.16147e-05		0.000634765		0.010408
23.5138	11.7569	0.0093749		7.28908e-05		0.000635816		0.0104352
23.5306	11.7653	0.00952213		7.40395e-05		0.000634412		0.010457
23.5475	11.7737	0.00967506		7.50683e-05		0.000630438		0.0104732
23.5643	11.7821	0.00983387		7.59927e-05		0.000623843		0.0104836
23.5811	11.7906	0.00999879		7.68338e-05		0.00061465		0.0104884
23.598	11.799	0.0101701		7.76169e-05		0.000602962		0.0104873
23.6148	11.8074	0.0103482		7.83667e-05		0.000588958		0.0104807
23.6316	11.8158	0.0105334		7.91058e-05		0.000572884		0.0104686
23.6485	11.8242	0.0107261		7.98564e-05		0.000555036		0.0104512
23.6653	11.8327	0.0109268		8.06345e-05		0.000535741		0.0104288
23.6821	11.8411	0.0111357		8.1453e-05		0.000515341		0.0104017
23.699	11.8495	0.0113533		8.23213e-05		0.000494168		0.01037
23.7158	11.8579	0.0115802		8.32477e-05		0.000472531		0.010334
23.7326	11.8663	0.0118166		8.42408e-05		0.000450703		0.010294
23.7495	11.8747	0.0120631		8.53124e-05		0.000428913		0.0102501
23.7663	11.8832	0.0123203		8.64775e-05		0.000407348		0.0102026
23.7831	11.8916	0.0125888		8.77509e-05		0.000386148		0.0101515
23.8	11.9	0.0128692		8.91457e-05		0.000365422		0.010097
23.8168	11.9084	0.0131623		9.06681e-05		0.000345243		0.0100393
23.8336	11.9168	0.013469		9.23182e-05		0.000325672		0.00997854
23.8505	11.9252	0.01379		9.40819e-05		0.000306754		0.00991488
23.8673	11.9337	0.0141263		9.59301e-05		0.00028853		0.00984853
23.8842	11.9421	0.0144788		9.78173e-05		0.000271039		0.00977971
23.901	11.9505	0.0148486		9.96828e-05		0.000254324		0.00970869
23.9178	11.9589	0.0152368		0.000101456		0.000238426		0.00963575
23.9347	11.9673	0.0156445		0.000103061		0.000223386		0.00956122
23.9515	11.9757	0.0160729		0.000104425		0.000209243		0.00948544
23.9683	11.9842	0.0165234		0.000105487		0.000196022		0.00940876
23.9852	11.9926	0.0169971		0.000106203		0.000183739		0.00933155
24.002	12.001	0.0174955		0.000106554		0.000172394		0.00925414
24.0188	12.0094	0.0180201		0.000106542		0.00016197		0.0091769
24.0357	12.0178	0.0185724		0.000106201		0.000152433		0.00910012
24.0525	12.0262	0.019154		0.000105582		0.000143735		0.00902408
24.0693	12.0347	0.0197667		0.000104752		0.000135813		0.008949
24.0862	12.0431	0.0204125		0.000103783		0.000128597		0.00887503
24.103	12.0515	0.0210934		0.000102745		0.000122011		0.00880223
24.1198	12.0599	0.0218115		0.000101692		0.000115977		0.0087306
24.1367	12.0683	0.0225694		0.000100665		0.000110421		0.00866007
24.1535	12.0768	0.0233695		9.96805e-05		0.000105272		0.00859048
24.1703	12.0852	0.0242148		9.87355e-05		0.000100469		0.00852166
24.1872	12.0936	0.0251083		9.78051e-05		9.59591e-05		0.00845339
24.204	12.102	0.0260532		9.68508e-05		9.17022e-05		0.00838549
24.2208	12.1104	0.0270532		9.58241e-05		8.76698e-05		0.00831784
24.2377	12.1188	0.0281122		9.46723e-05		8.38453e-05		0.00825038
24.2545	12.1273	0.0292343		9.33436e-05		8.0221e-05		0.00818319
24.2713	12.1357	0.0304241		9.17913e-05		7.67973e-05		0.00811645
24.2882	12.1441	0.0316864		8.99775e-05		7.35788e-05		0.00805049
24.305	12.1525	0.0330266		8.78746e-05		7.057e-05		0.00798576
24.3218	12.1609	0.0344502		8.54618e-05		6.77725e-05		0.00792278
24.3387	12.1693	0.0359634		8.27249e-05		6.51788e-05		0.00786217
24.3555	12.1778	0.0375726		7.96545e-05		6.27727e-05		0.00780457
24.3724	12.1862	0.0392849		7.62478e-05		6.05287e-05		0.00775064
24.3892	12.1946	0.0411076		7.25052e-05		5.841e-05		0.00770097
24.406	12.203	0.0430488		6.84312e-05		5.63708e-05		0.00765608
24.4229	12.2114	0.045117		6.40343e-05		5.43593e-05		0.00761639
24.4397	12.2198	0.0473211		5.93297e-05		5.23209e-05		0.00758218
24.4565	12.2283	0.0496709		5.43384e-05		5.02048e-05		0.00755361
24.4734	12.2367	0.0521766		4.90897e-05		4.79679e-05		0.00753073
24.4902	12.2451	0.0548492		4.36256e-05		4.55788e-05		0.00751347
24.507	12.2535	0.0577001		3.79942e-05		4.3022e-05		0.00750173
24.5239	12.2619	0.0607416		3.22509e-05		4.02987e-05		0.00749535
24.5407	12.2703	0.0639866		2.64548e-05		3.74278e-05		0.00749419
24.5575	12.2788	0.0674487		2.06618e-05		3.4444e-05		0.00749813
24.5744	12.2872	0.0711422		1.49276e-05		3.13945e-05		0.0075071
24.5912	12.2956	0.0750819		9.30506e-06		2.83384e-05		0.00752112
24.608	12.304	0.0792835		3.83675e-06		2.53407e-05		0.00754029
24.6249	12.3124	0.0837631		-1.44487e-06		2.24677e-05		0.00756478
24.6417	12.3209	0.0885373		-6.51678e-06		1.9784e-05		0.00759483
24.6585	12.3293	0.0936233		-1.13641e-05		1.73484e-05		0.00763073
24.6754	12.3377	0.0990387		-1.59836e-05		1.52119e-05		0.00767276
24.6922	12.3461	0.104801		-2.03743e-05		1.34147e-05		0.00772123
24.709	12.3545	0.110929		-2.45371e-05		1.19861e-05		0.00777646
24.7259	12.3629	0.11744		-2.84731e-05		1.09409e-05		0.00783874
24.7427	12.3714	0.124351		-3.21832e-05		1.02844e-05		0.00790836
24.7595	12.3798	0.131682		-3.56672e-05		1.00078e-05		0.00798559
24.7764	12.3882	0.139449		-3.89226e-05		1.00914e-05		0.00807067
24.7932	12.3966	0.147668		-4.19496e-05		1.05037e-05		0.00816389
24.8101	12.405	0.156356		-4.47526e-05		1.12037e-05		0.00826554
24.8269	12.4134	0.165526		-4.73413e-05		1.2141e-05		0.00837589
24.8437	12.4219	0.175193		-4.9732e-05		1.32584e-05		0.00849526
24.8606	12.4303	0.185368		-5.19503e-05		1.44954e-05		0.00862398
24.8774	12.4387	0.196062		-5.40307e-05		1.57884e-05		0.00876241
24.8942	12.4471	0.207282		-5.60159e-05		1.70758e-05		0.00891094
24.9111	12.4555	0.219035		-5.79538e-05		1.83014e-05		0.00906995
24.9279	12.4639	0.231325		-5.98936e-05		1.94183e-05		0.00923981
24.9447	12.4724	0.244152		-6.18802e-05		2.03885e-05		0.00942094
24.9616	12.4808	0.257516		-6.39526e-05		2.11851e-05		0.00961373
24.9784	12.4892	0.271411		-6.61415e-05		2.17935e-05		0.0098186
24.9952	12.4976	0.28583		-6.84603e-05		2.22099e-05		0.0100359
25.0121	12.506	0.300764		-7.09128e-05		2.24409e-05		0.0102661
25.0289	12.5145	0.316197		-7.34899e-05		2.25015e-05		0.0105096
25.0457	12.5229	0.332112		-7.61741e-05		2.24126e-05		0.0107668
25.0626	12.5313	0.348491		-7.89395e-05		2.21986e-05		0.0110382
25.0794	12.5397	0.365308		-8.17519e-05		2.18842e-05		0.0113242
25.0962	12.5481	0.382538		-8.45757e-05		2.14929e-05		0.0116255
25.1131	12.5565	0.40015		-8.7375e-05		2.10447e-05		0.0119427
25.1299	12.565	0.418113		-9.01109e-05		2.05554e-05		0.0122763
25.1467	12.5734	0.43639		-9.27442e-05		2.00357e-05		0.0126271
25.1636	12.5818	0.454945		-9.52312e-05		1.9491e-05		0.0129959
25.1804	12.5902	0.473737		-9.75251e-05		1.89214e-05		0.0133835
25.1972	12.5986	0.492726		-9.95693e-05		1.83231e-05		0.0137908
25.2141	12.607	0.511868		-0.000101295		1.76894e-05		0.0142187
25.2309	12.6155	0.53112		-0.000102619		1.70129e-05		0.0146682
25.2477	12.6239	0.550435		-0.000103443		1.6285e-05		0.0151405
25.2646	12.6323	0.56977		-0.000103646		1.54943e-05		0.0156368
25.2814	12.6407	0.589077		-0.000103081		1.4633e-05		0.0161582
25.2983	12.6491	0.608312		-0.000101578		1.37068e-05		0.0167061
25.3151	12.6575	0.62743		-9.89353e-05		1.27277e-05		0.0172821
25.3319	12.666	0.646385		-9.4917e-05		1.17092e-05		0.0178876
25.3488	12.6744	0.665133		-8.92564e-05		1.06711e-05		0.0185244
25.3656	12.6828	0.683633		-8.16594e-05		9.64064e-06		0.0191943
25.3824	12.6912	0.701843		-7.18076e-05		8.65003e-06		0.0198993
25.3993	12.6996	0.719723		-5.93789e-05		7.73633e-06		0.0206415
25.4161	12.708	0.737236		-4.40662e-05		6.93888e-06		0.0214231
25.4329	12.7165	0.754345		-2.56038e-05		6.2982e-06		0.0222465
25.4498	12.7249	0.771017		-3.79368e-06		5.854e-06		0.0231143
25.4666	12.7333	0.787221		2.14663e-05		5.6416e-06		0.024029
25.4834	12.7417	0.802928		5.0162e-05		5.69227e-06		0.0249936
25.5003	12.7501	0.818111		8.21512e-05		6.03112e-06		0.0260109
25.5171	12.7586	0.832748		0.000117163		6.6771e-06		0.0270843
25.5339	12.767	0.846817		0.000154809		7.64333e-06		0.028217
25.5508	12.7754	0.8603	102898	0.000194603		8.93631e-06		0.0294127
25.5676	12.7838	0.873182	103090	0.000235998		1.05568e-05		0.030675
25.5844	12.7922	0.885449	103143	0.000278423		1.25008e-05		0.0320081
25.6013	12.8006	0.897092	103182	0.000321315		1.4759e-05		0.0334161
25.6181	12.8091	0.908103	103250	0.000364156		1.73184e-05		0.0349035
25.6349	12.8175	0.918476	103326	0.000406495		2.01597e-05		0.0364751
25.6518	12.8259	0.928206	103466	0.000447966		2.32607e-05		0.0381358
25.6686	12.8343	0.937294	103511	0.000488303		2.65941e-05		0.039891
25.6854	12.8427	0.945738	103523	0.000527334		3.01272e-05		0.0417461
25.7023	12.8511	0.953541	103530	0.000564982		3.38222e-05		0.0437067
25.7191	12.8596	0.960707	103491	0.000601257		3.76363e-05		0.0457791
25.736	12.868	0.96724	103480	0.00063625		4.15242e-05		0.0479693
25.7528	12.8764	0.973147	103509	0.000670123		4.54368e-05		0.050284
25.7696	12.8848	0.978436	103603	0.000703102		4.93246e-05		0.0527299
25.7865	12.8932	0.983115	103719	0.000735471		5.31381e-05		0.0553142
25.8033	12.9016	0.987194	103749	0.000767566		5.68324e-05		0.0580443
25.8201	12.9101	0.990685	103718	0.000799763		6.03739e-05		0.0609278
25.837	12.9185	0.9936	103648	0.00083247		6.37234e-05		0.0639727
25.8538	12.9269	0.995951	103599	0.000866113		6.68607e-05		0.0671875
25.8706	12.9353	0.997752	103555	0.000901127		6.97793e-05		0.0705805
25.8875	12.9437	0.999017	103507	0.000937932		7.24702e-05		0.0741608
25.9043	12.9521	0.999762	103413	0.000976925		7.49422e-05		0.0779375
25.9211	12.9606	1	103386	0.00101846		7.7214e-05		0.0819198
25.938	12.969	0.999748	103417	0.00106286		7.93117e-05		0.0861175
25.9548	12.9774	0.999022	103443	0.00111039		8.12687e-05		0.0905401
25.9716	12.9858	0.997838	103387	0.0011613		8.31251e-05		0.0951975
25.9885	12.9942	0.996212	103390	0.00121578		8.49311e-05		0.1001
26.0053	13.0027	0.99416	103360	0.00127405		8.6747e-05		0.105257
26.0221	13.0111	0.9917	103369	0.00133629		8.86499e-05		0.110679
26.039	13.0195	0.988846	103445	0.00140273		9.07435e-05		0.116376
26.0558	13.0279	0.985617	103458	0.00147361		9.31598e-05		0.122357
26.0726	13.0363	0.982028	103410	0.00154919		9.60647e-05		0.128633
26.0895	13.0447	0.978096	103347	0.00162978		9.96604e-05		0.135214
26.1063	13.0532	0.973835	103361	0.00171568		0.000104183		0.142108
26.1231	13.0616	0.969263	103416	0.00180723		0.000109894		0.149324
26.14	13.07	0.964395	103352	0.00190474		0.000117069		0.156873
26.1568	13.0784	0.959245	103215	0.00200853		0.000125977		0.164761
26.1736	13.0868	0.953829	103128	0.0021189		0.000136862		0.172996
26.1905	13.0952	0.948161	103140	0.00223613		0.000149916		0.181588
26.2073	13.1037	0.942256	103102	0.00236048		0.000165261		0.190541
26.2242	13.1121	0.936128	103013	0.00249217		0.000182934		0.199862
26.241	13.1205	0.92979	102849	0.00263142		0.000202878		0.209557
26.2578	13.1289	0.923256	102668	0.00277842		0.000224939		0.21963
26.2747	13.1373	0.916539	102528	0.00293335		0.000248876		0.230085
26.2915	13.1457	0.909651	102489	0.00309637		0.000274375		0.240924
26.3083	13.1542	0.902606	102317	0.00326764		0.000301074		0.25215
26.3252	13.1626	0.895415	102146	0.00344733		0.000328587		0.263762
26.342	13.171	0.88809	102107	0.00363559		0.000356527		0.275761
26.3588	13.1794	0.880642	102053	0.00383257		0.000384535		0.288143
26.3757	13.1878	0.873083	101460	0.00403843		0.00041229		0.300907
26.3925	13.1962	0.865422		0.0042533		0.000439532		0.314047
26.4093	13.2047	0.85767		0.0044773		0.000466065		0.327556
26.4262	13.2131	0.849837		0.00471052		0.000491762		0.341429
26.443	13.2215	0.841933		0.00495302		0.000516571		0.355655
26.4598	13.2299	0.833966		0.0052048		0.000540507		0.370223
26.4767	13.2383	0.825946		0.00546584		0.000563655		0.385122
26.4935	13.2468	0.817882		0.00573606		0.000586161		0.400339
26.5103	13.2552	0.809781		0.00601534		0.000608233		0.415856
26.5272	13.2636	0.801653		0.00630348		0.000630125		0.431659
26.544	13.272	0.793505		0.00660027		0.00065213		0.447727
26.5608	13.2804	0.785344		0.00690541		0.000674568		0.464041
26.5777	13.2888	0.777179		0.00721857		0.000697767		0.48058
26.5945	13.2973	0.769016		0.00753939		0.000722047		0.49732
26.6113	13.3057	0.760863		0.00786743		0.000747696		0.514238
26.6282	13.3141	0.752725		0.00820222		0.000774959		0.531306
26.645	13.3225	0.74461		0.00854327		0.000804027		0.548499
26.6619	13.3309	0.736522		0.00889003		0.00083502		0.565788
26.6787	13.3393	0.728468		0.00924193		0.000868002		0.583145
26.6955	13.3478	0.720453		0.00959836		0.000902976		0.600538
26.7124	13.3562	0.712482		0.00995868		0.000939902		0.617938
26.7292	13.3646	0.704559		0.0103222		0.000978714		0.635311
26.746	13.373	0.69669		0.0106883		0.00101934		0.652627
26.7629	13.3814	0.688879		0.0110561		0.0010617		0.669852
26.7797	13.3898	0.681129		0.0114249		0.00110574		0.686952
26.7965	13.3983	0.673444		0.0117938		0.00115144		0.703895
26.8134	13.4067	0.665827		0.012162		0.00119878		0.720645
26.8302	13.4151	0.658283		0.0125285		0.00124778		0.737171
26.847	13.4235	0.650813		0.0128923		0.00129846		0.753438
26.8639	13.4319	0.643422		0.0132524		0.00135086		0.769413
26.8807	13.4404	0.636111		0.0136076		0.00140502		0.785064
26.8975	13.4488	0.628883		0.013957		0.001461		0.800358
26.9144	13.4572	0.62174		0.0142994		0.00151883		0.815264
26.9312	13.4656	0.614685		0.0146339		0.00157858		0.829752
26.948	13.474	0.607721		0.0149593		0.00164027		0.843793
26.9649	13.4824	0.600847		0.0152749		0.00170394		0.85736
26.9817	13.4909	0.594068		0.0155798		0.00176962		0.870424
26.9985	13.4993	0.587382		0.0158733		0.0018373		0.882962
27.0154	13.5077	0.580793		0.016155		0.00190696		0.894949	86041.3
27.0322	13.5161	0.5743		0.0164244		0.00197857		0.906364	85973
27.049	13.5245	0.567905		0.0166813		0.00205207		0.917186	85959
27.0659	13.5329	0.561607		0.0169254		0.00212739		0.927396	85996.6
27.0827	13.5414	0.555407		0.0171566		0.00220444		0.936979	86046.8
27.0996	13.5498	0.549305		0.0173749		0.00228314		0.945918	86077.4
27.1164	13.5582	0.543301		0.0175803		0.0023634		0.954201	86112.7
27.1332	13.5666	0.537394		0.0177726		0.00244513		0.961815	86212.4
27.1501	13.575	0.531585		0.0179517		0.00252822		0.968752	86301.6
27.1669	13.5834	0.525871		0.0181174		0.0026126		0.975002	86347.7
27.1837	13.5919	0.520254		0.0182697		0.00269817		0.980561	86412
27.2006	13.6003	0.514732		0.0184081		0.00278483		0.985423	86491.1
27.2174	13.6087	0.509303		0.0185325		0.00287245		0.989587	86556.4
27.2342	13.6171	0.503968		0.0186426		0.00296092		0.993052	86605
27.2511	13.6255	0.498724		0.0187383		0.0030501		0.995819	86624.6
27.2679	13.6339	0.49357		0.0188195		0.00313984		0.997892	86588.8
27.2847	13.6424	0.488504		0.018886		0.00322997		0.999275	86588.7
27.3016	13.6508	0.483524		0.018938		0.00332034		0.999975	86654.1
27.3184	13.6592	0.478629		0.0189757		0.00341077		1	86709.7
27.3352	13.6676	0.473816		0.0189993		0.00350112		0.99936	86727.4
27.3521	13.676	0.469083		0.0190093		0.00359122		0.998067	86701
27.3689	13.6845	0.464427		0.019006		0.00368092		0.996134	86720.5
27.3857	13.6929	0.459846		0.0189899		0.00377007		0.993575	86768.2
27.4026	13.7013	0.455337		0.0189616		0.0038585		0.990404	86838.5
27.4194	13.7097	0.450899		0.0189216		0.00394602		0.98664	86900.5
27.4362	13.7181	0.446528		0.0188707		0.00403241		0.9823	86920.9
27.4531	13.7265	0.442222		0.0188093		0.00411745		0.977402	86907
27.4699	13.735	0.437979		0.0187382		0.00420087		0.971966	86991.9
27.4867	13.7434	0.433796		0.0186581		0.00428239		0.966013	87183
27.5036	13.7518	0.429671		0.0185697		0.00436175		0.959564	87236.9
27.5204	13.7602	0.425602		0.0184738		0.00443869		0.952639	87209
27.5372	13.7686	0.421587		0.018371		0.00451298		0.945262	87078
27.5541	13.777	0.417623		0.0182621		0.00458441		0.937454	87054.9
27.5709	13.7855	0.413709		0.0181481		0.00465284		0.929238	86689.8
27.5878	13.7939	0.409842		0.0180295		0.00471816		0.920637
27.6046	13.8023	0.406021		0.0179073		0.00478032		0.911672
27.6214	13.8107	0.402242		0.0177823		0.00483931		0.902367
27.6383	13.8191	0.398505		0.0176552		0.00489516		0.892745
27.6551	13.8275	0.394807		0.017527		0.00494796		0.882827
27.6719	13.836	0.391147		0.0173984		0.00499782		0.872636
27.6888	13.8444	0.387522		0.0172703		0.00504491		0.862194
27.7056	13.8528	0.38393		0.0171436		0.00508941		0.851523
27.7224	13.8612	0.380369		0.0170189		0.00513155		0.840643
27.7393	13.8696	0.376839		0.016897		0.00517161		0.829576
27.7561	13.878	0.373336		0.0167787		0.00520987		0.818341
27.7729	13.8865	0.36986		0.0166645		0.00524667		0.80696
27.7898	13.8949	0.366408		0.016555		0.00528234		0.79545
27.8066	13.9033	0.362979		0.0164506		0.00531727		0.783832
27.8234	13.9117	0.359572		0.0163517		0.00535182		0.772121
27.8403	13.9201	0.356185		0.0162586		0.00538637		0.760337
27.8571	13.9286	0.352817		0.0161716		0.00542127		0.748494
27.8739	13.937	0.349467		0.0160909		0.00545683		0.73661
27.8908	13.9454	0.346133		0.0160169		0.00549332		0.7247
27.9076	13.9538	0.342816		0.0159497		0.00553093		0.712777
27.9244	13.9622	0.339514		0.0158897		0.00556978		0.700855
27.9413	13.9706	0.336227		0.0158371		0.00560988		0.688948
27.9581	13.9791	0.332954		0.0157923		0.00565118		0.677067
27.9749	13.9875	0.329695		0.0157557		0.00569355		0.665225
27.9918	13.9959	0.32645		0.0157275		0.0057368		0.653432
28.0086	14.0043	0.323218		0.015708		0.00578072		0.641698
28.0255	14.0127	0.32		0.0156977		0.0058251		0.630034
28.0423	14.0211	0.316794		0.0156968		0.00586977		0.618447
28.0591	14.0296	0.313602		0.0157056		0.00591461		0.606947
28.076	14.038	0.310424		0.0157242		0.00595958		0.595541
28.0928	14.0464	0.307259		0.0157531		0.00600475		0.584236
28.1096	14.0548	0.304108		0.0157922		0.00605025		0.573039
28.1265	14.0632	0.300971		0.015842		0.0060963		0.561955
28.1433	14.0716	0.297848		0.0159024		0.00614319		0.55099
28.1601	14.0801	0.29474		0.0159737		0.00619125		0.540149
28.177	14.0885	0.291648		0.016056		0.00624082		0.529437
28.1938	14.0969	0.288572		0.0161492		0.00629227		0.518857
28.2106	14.1053	0.285512		0.0162535		0.00634591		0.508413
28.2275	14.1137	0.282468		0.016369		0.00640206		0.498108
28.2443	14.1222	0.279443		0.0164956		0.00646096		0.487945
28.2611	14.1306	0.276435		0.0166333		0.00652285		0.477926
28.278	14.139	0.273446		0.0167821		0.00658791		0.468054
28.2948	14.1474	0.270476		0.0169421		0.0066563		0.458329
28.3116	14.1558	0.267526		0.0171132		0.00672815		0.448755
28.3285	14.1642	0.264597		0.0172954		0.00680355		0.439331
28.3453	14.1727	0.26169		0.0174888		0.0068826		0.430059
28.3621	14.1811	0.258806		0.0176934		0.00696535		0.420939
28.379	14.1895	0.255946		0.0179094		0.00705186		0.411972
28.3958	14.1979	0.253112		0.0181368		0.00714216		0.403158
28.4126	14.2063	0.250304		0.0183758		0.00723627		0.394498
28.4295	14.2147	0.247524		0.0186266		0.00733422		0.385991
28.4463	14.2232	0.244772		0.0188894		0.00743602		0.377637
28.4631	14.2316	0.24205		0.0191645		0.00754172		0.369435
28.48	14.24	0.239359		0.0194522		0.00765134		0.361385
28.4968	14.2484	0.236698		0.0197529		0.00776496		0.353485
28.5137	14.2568	0.23407		0.0200668		0.00788267		0.345736
28.5305	14.2652	0.231474		0.0203945		0.00800459		0.338136
28.5473	14.2737	0.228911		0.0207364		0.00813085		0.330683
28.5642	14.2821	0.226381		0.0210931		0.00826161		0.323377
28.581	14.2905	0.223885		0.0214652		0.00839702		0.316216
28.5978	14.2989	0.221422		0.0218535		0.00853726		0.309198
28.6147	14.3073	0.218993		0.0222587		0.00868247		0.302323
28.6315	14.3157	0.216597		0.0226819		0.00883282		0.295588
28.6483	14.3242	0.214236		0.0231241		0.00898843		0.288992
28.6652	14.3326	0.211909		0.0235867		0.00914943		0.282533
28.682	14.341	0.209617		0.0240711		0.00931592		0.27621
28.6988	14.3494	0.207359		0.0245791		0.00948798		0.270021
28.7157	14.3578	0.205136		0.0251125		0.0096657		0.263964
28.7325	14.3663	0.202948		0.0256737		0.00984914		0.258037
28.7493	14.3747	0.200795		0.026265		0.0100384		0.252239
28.7662	14.3831	0.198677		0.0268894		0.0102335		0.246567
28.783	14.3915	0.196594		0.0275499		0.0104346		0.241019
28.7998	14.3999	0.194547		0.0282503		0.0106418		0.235594
28.8167	14.4083	0.192535		0.0289943		0.0108552		0.230289
28.8335	14.4168	0.190559		0.0297866		0.011075		0.225103
28.8503	14.4252	0.188618		0.030632		0.0113013		0.220033
28.8672	14.4336	0.186712		0.031536		0.0115343		0.215077
28.884	14.442	0.184842		0.0325048		0.0117741		0.210234
28.9008	14.4504	0.183006		0.0335451		0.012021		0.2055
28.9177	14.4588	0.181204		0.0346645		0.0122751		0.200875
28.9345	14.4673	0.179437		0.0358712		0.0125365		0.196356
28.9514	14.4757	0.177704		0.0371745		0.0128056		0.19194
28.9682	14.4841	0.176004		0.0385846		0.0130826		0.187626
28.985	14.4925	0.174337		0.0401126		0.0133677		0.183412
29.0019	14.5009	0.172704		0.0417708		0.0136613		0.179295
29.0187	14.5093	0.171102		0.0435725		0.0139636		0.175274
29.0355	14.5178	0.169533		0.0455325		0.014275		0.171345
29.0524	14.5262	0.167996		0.0476665		0.0145961		0.167507
29.0692	14.5346	0.16649		0.0499918		0.0149272		0.163758
29.086	14.543	0.165015		0.0525267		0.015269		0.160096
29.1029	14.5514	0.16357		0.0552911		0.0156221		0.156518
29.1197	14.5598	0.162154		0.0583061		0.0159871		0.153022
29.1365	14.5683	0.160768		0.0615944		0.0163647		0.149606
29.1534	14.5767	0.15941		0.0651797		0.0167559		0.146268
29.1702	14.5851	0.158079		0.0690872		0.0171614		0.143006
29.187	14.5935	0.156776		0.0733432		0.0175821		0.139818
29.2039	14.6019	0.1555		0.077975		0.0180193		0.136703
29.2207	14.6104	0.154249		0.083011		0.0184738		0.133657
29.2375	14.6188	0.153024		0.0884803		0.018947		0.130679
29.2544	14.6272	0.151824		0.0944123		0.0194401		0.127768
29.2712	14.6356	0.150649		0.100837		0.0199546		0.124921
29.288	14.644	0.149498		0.107784		0.020492		0.122137
29.3049	14.6524	0.14837		0.115283		0.021054		0.119414
29.3217	14.6609	0.147266		0.123364		0.0216426		0.11675
29.3385	14.6693	0.146185		0.132052		0.0222597		0.114144
29.3554	14.6777	0.145126		0.141376		0.0229076		0.111594
29.3722	14.6861	0.14409		0.15136		0.023589		0.109099
29.3891	14.6945	0.143074		0.162026		0.0243065		0.106658
29.4059	14.7029	0.14208		0.173395		0.0250633		0.104268
29.4227	14.7114	0.141106		0.185482		0.0258627		0.10193
29.4396	14.7198	0.140151		0.198301		0.0267085		0.0996407
29.4564	14.7282	0.139216		0.211863		0.0276049		0.0974002
29.4732	14.7366	0.1383		0.226172		0.0285563		0.0952071
29.4901	14.745	0.137401		0.241229		0.0295676		0.0930602
29.5069	14.7534	0.136521		0.257031		0.0306442		0.0909584
29.5237	14.7619	0.135658		0.273567		0.0317919		0.0889006
29.5406	14.7703	0.134812		0.290825		0.033017		0.0868857
29.5574	14.7787	0.133983		0.308784		0.0343264		0.0849128
29.5742	14.7871	0.13317		0.32742		0.0357275		0.0829808
29.5911	14.7955	0.132373		0.3467		0.0372285		0.0810888
29.6079	14.8039	0.131591		0.36659		0.0388378		0.0792358
29.6247	14.8124	0.130823		0.387048		0.040565		0.0774209
29.6416	14.8208	0.130069		0.408028		0.04242		0.0756434
29.6584	14.8292	0.129329		0.429478		0.0444136		0.0739023
29.6752	14.8376	0.128601		0.451344		0.0465571		0.072197
29.6921	14.846	0.127885		0.473564		0.0488629		0.0705269
29.7089	14.8545	0.127181		0.496077		0.0513437		0.0688911
29.7257	14.8629	0.126487		0.518816		0.0540132		0.0672892
29.7426	14.8713	0.125804		0.541713		0.0568857		0.0657205
29.7594	14.8797	0.125131		0.564697		0.0599761		0.0641846
29.7762	14.8881	0.124467		0.587696		0.0633		0.0626808
29.7931	14.8965	0.123813		0.610637		0.0668736		0.0612086
29.8099	14.905	0.123169		0.633448		0.0707136		0.0597675
29.8267	14.9134	0.122533		0.656056		0.0748371		0.058357
29.8436	14.9218	0.121907		0.678389		0.0792616		0.0569766
29.8604	14.9302	0.12129		0.700377		0.0840051		0.0556257
29.8773	14.9386	0.120682		0.721951		0.0890857		0.0543037
29.8941	14.947	0.120083		0.743046		0.0945215		0.0530103
29.9109	14.9555	0.119493		0.763599		0.100331		0.0517448
29.9278	14.9639	0.118912		0.783549		0.106532		0.0505069
29.9446	14.9723	0.11834		0.80284		0.113143		0.0492959
29.9614	14.9807	0.117776		0.821419		0.120181		0.0481115
29.9783	14.9891	0.117219		0.839238		0.127663		0.0469532
29.9951	14.9975	0.116671		0.856253		0.135606		0.0458206
30.0119	15.006	0.11613		0.872422	27549.5	0.144026		0.0447133
30.0288	15.0144	0.115596		0.887711	27596.1	0.152937		0.0436309
30.0456	15.0228	0.115069		0.902087	27620.2	0.162354		0.042573
30.0624	15.0312	0.114547		0.915525	27626.2	0.172288		0.0415391
30.0793	15.0396	0.114032		0.928002	27635.7	0.18275		0.040529
30.0961	15.0481	0.113523		0.939499	27693.4	0.193751		0.0395423
30.1129	15.0565	0.113019		0.950003	27752.4	0.205298		0.0385785
30.1298	15.0649	0.11252		0.959503	27773.6	0.217396		0.0376373
30.1466	15.0733	0.112026		0.967993	27759.3	0.23005		0.0367184
30.1634	15.0817	0.111538		0.97547	27719.5	0.243262		0.0358214
30.1803	15.0901	0.111054		0.981937	27689.1	0.257032		0.0349459
30.1971	15.0986	0.110575		0.987398	27700.2	0.271355		0.0340916
30.2139	15.107	0.1101		0.991861	27736.9	0.286228		0.0332581
30.2308	15.1154	0.10963		0.995337	27785.1	0.301642		0.0324451
30.2476	15.1238	0.109164		0.997841	27833.8	0.317586		0.0316522
30.2644	15.1322	0.108701		0.999389	27872.2	0.334049		0.0308791
30.2813	15.1406	0.108242		1	27897.8	0.351012		0.0301254
30.2981	15.1491	0.107785		0.999696	27904.2	0.368458		0.0293907
30.315	15.1575	0.107332		0.998501	27883.8	0.386365		0.0286747
30.3318	15.1659	0.10688		0.99644	27864.1	0.404709		0.0279769
30.3486	15.1743	0.106432		0.99354	27891.8	0.423461		0.027297
30.3655	15.1827	0.105985		0.98983	27930.3	0.442593		0.0266346
30.3823	15.1911	0.10554		0.98534	27963.6	0.46207		0.0259893
30.3991	15.1996	0.105097		0.9801	27995.7	0.481856		0.0253608
30.416	15.208	0.104657		0.974143	27992.6	0.501914		0.0247486
30.4328	15.2164	0.104218		0.967502	28011	0.522203		0.0241525
30.4496	15.2248	0.103781		0.960209	28050	0.542678		0.023572
30.4665	15.2332	0.103347		0.952298	28033.3	0.563294		0.0230068
30.4833	15.2416	0.102915		0.943804	28033.1	0.584004		0.0224567
30.5001	15.2501	0.102486		0.93476	28060.5	0.604757		0.0219214
30.517	15.2585	0.102059		0.925201	28028.7	0.625503		0.0214005
30.5338	15.2669	0.101635		0.915161	27965.3	0.646188		0.0208938
30.5506	15.2753	0.101213		0.904674	27937.5	0.666759		0.0204011
30.5675	15.2837	0.100794		0.893773	27924.9	0.687161		0.0199221
30.5843	15.2922	0.100377		0.882492	27937.1	0.707338		0.0194565
30.6011	15.3006	0.0999631		0.870863	27911.3	0.727235		0.0190041
30.618	15.309	0.099551		0.858918	27829.8	0.746796	21874.4	0.0185645
30.6348	15.3174	0.0991408		0.846689	27831.7	0.765966	22105.5	0.0181375
30.6516	15.3258	0.0987324		0.834206	27851.6	0.78469	22079.8	0.0177228
30.6685	15.3342	0.0983256		0.8215		0.802913	22180.2	0.0173199
30.6853	15.3427	0.0979203		0.808598		0.820585	22256.6	0.0169285
30.7021	15.3511	0.0975162		0.79553		0.837653	22267.3	0.0165484
30.719	15.3595	0.0971134		0.782323		0.854068	22275.8	0.016179
30.7358	15.3679	0.0967119		0.769002		0.869785	22291.6	0.0158201
30.7526	15.3763	0.0963116		0.755592		0.884758	22295	0.0154714
30.7695	15.3847	0.0959126		0.742119		0.898947	22268.5	0.0151325
30.7863	15.3932	0.0955151		0.728603		0.912312	22247.4	0.0148033
30.8032	15.4016	0.0951191		0.715069		0.924819	22228.9	0.0144835
30.82	15.41	0.0947247		0.701536		0.936435	22228.9	0.0141729
30.8368	15.4184	0.094332		0.688023		0.947132	22282.2	0.0138712
30.8537	15.4268	0.093941		0.674551		0.956885	22299.8	0.0135784
30.8705	15.4352	0.0935517		0.661135		0.965673	22310.8	0.0132944
30.8873	15.4437	0.093164		0.647792		0.973479	22319.5	0.0130188
30.9042	15.4521	0.0927777		0.634538		0.980289	22321.4	0.0127515
30.921	15.4605	0.0923928		0.621387		0.986095	22338.8	0.0124924
30.9378	15.4689	0.0920091		0.608351		0.99089	22374.7	0.0122413
30.9547	15.4773	0.0916263		0.595444		0.994674	22398.6	0.0119978
30.9715	15.4857	0.0912444		0.582675		0.997448	22406.9	0.0117618
30.9883	15.4942	0.0908631		0.570055		0.999221	22392.8	0.0115329
31.0052	15.5026	0.0904824		0.557593		1	22371.6	0.0113109
31.022	15.511	0.090102		0.545297		0.9998	22323.9	0.0110956
31.0388	15.5194	0.0897221		0.533174		0.998638	22226.3	0.0108865
31.0557	15.5278	0.0893424		0.52123		0.996535	22139.5	0.0106836
31.0725	15.5363	0.088963		0.509472		0.993512	22122.2	0.0104865
31.0893	15.5447	0.0885839		0.497904		0.989596	22158.8	0.0102952
31.1062	15.5531	0.0882052		0.486529		0.984815	22208	0.0101093
31.123	15.5615	0.087827		0.475351		0.9792	22244.1	0.00992895
31.1398	15.5699	0.0874492		0.464373		0.972783	22234.6	0.00975389
31.1567	15.5783	0.0870721		0.453596		0.9656	22263.9	0.00958408
31.1735	15.5868	0.0866956		0.443022		0.957685	22307	0.00941945
31.1903	15.5952	0.0863199		0.432651		0.949077	22373.7	0.00925987
31.2072	15.6036	0.0859449		0.422484		0.939814	22447.5	0.0091052
31.224	15.612	0.0855708		0.412521		0.929935	22497	0.00895528
31.2409	15.6204	0.0851975		0.402761		0.91948	22484.6	0.00880987
31.2577	15.6288	0.0848249		0.393203		0.908488	22466.2	0.00866874
31.2745	15.6373	0.0844531		0.383845		0.897002	22461	0.00853166
31.2914	15.6457	0.0840818		0.374687		0.88506	22399.8	0.00839841
31.3082	15.6541	0.0837111		0.365726		0.872704	22320.2	0.00826881
31.325	15.6625	0.0833408		0.35696		0.859972	22292.2	0.00814275
31.3419	15.6709	0.0829708		0.348387		0.846905	22314	0.00802017
31.3587	15.6793	0.0826012		0.340003		0.833539	22301.5	0.00790109
31.3755	15.6878	0.0822319		0.331806		0.819914	22310.7	0.00778558
31.3924	15.6962	0.0818628		0.323794		0.806065	22321.8	0.00767373
31.4092	15.7046	0.081494		0.315961		0.792027		0.00756568
31.426	15.713	0.0811255		0.308306		0.777836		0.00746151
31.4429	15.7214	0.0807574		0.300825		0.763523		0.00736129
31.4597	15.7299	0.0803898		0.293514		0.749119		0.00726499
31.4765	15.7383	0.0800227		0.286371		0.734656		0.00717251
31.4934	15.7467	0.0796563		0.27939		0.720161		0.00708367
31.5102	15.7551	0.0792907		0.27257		0.705661		0.00699816
31.527	15.7635	0.078926		0.265906		0.691182		0.00691563
31.5439	15.7719	0.0785625		0.259396		0.676746		0.00683564
31.5607	15.7804	0.0782003		0.253035		0.662376		0.00675773
31.5775	15.7888	0.0778395		0.246822		0.648093		0.00668143
31.5944	15.7972	0.0774805		0.240752		0.633916		0.00660631
31.6112	15.8056	0.0771233		0.234822		0.619861		0.006532
31.628	15.814	0.0767681		0.22903		0.605946		0.00645823
31.6449	15.8224	0.0764152		0.223372		0.592183		0.00638482
31.6617	15.8309	0.0760646		0.217845		0.578588		0.00631173
31.6785	15.8393	0.0757165		0.212446		0.565171		0.00623902
31.6954	15.8477	0.0753708		0.207172		0.551942		0.00616686
31.7122	15.8561	0.0750277		0.20202		0.538911		0.00609551
31.7291	15.8645	0.0746871		0.196988		0.526087		0.00602527
31.7459	15.8729	0.0743491		0.192072		0.513474		0.00595647
31.7627	15.8814	0.0740136		0.187269		0.501081		0.00588943
31.7796	15.8898	0.0736804		0.182578		0.48891		0.00582445
31.7964	15.8982	0.0733497		0.177995		0.476966		0.00576178
31.8132	15.9066	0.0730212		0.173517		0.465252		0.00570159
31.8301	15.915	0.0726949		0.169143		0.45377		0.00564401
31.8469	15.9234	0.0723708		0.164871		0.442521		0.00558909
31.8637	15.9319	0.0720489		0.160697		0.431505		0.00553683
31.8806	15.9403	0.0717291		0.156619		0.420723		0.00548714
31.8974	15.9487	0.0714115		0.152637		0.410173		0.00543992
31.9142	15.9571	0.071096		0.148746		0.399855		0.005395
31.9311	15.9655	0.0707828		0.144947		0.389766		0.00535216
31.9479	15.974	0.070472		0.141236		0.379906		0.00531116
31.9647	15.9824	0.0701635		0.137612		0.37027		0.00527169
31.9816	15.9908	0.0698574		0.134074		0.360856		0.00523345
31.9984	15.9992	0.0695537		0.130619		0.351661		0.00519606
32.0152	16.0076	0.0692525		0.127246		0.342683		0.00515915
32.0321	16.016	0.0689539		0.123953		0.333916		0.00512233
32.0489	16.0245	0.0686577		0.120739		0.325359		0.00508523
32.0657	16.0329	0.068364		0.117601		0.317006		0.0050475
32.0826	16.0413	0.0680726		0.11454		0.308854		0.00500885
32.0994	16.0497	0.0677837		0.111552		0.300899		0.00496907
32.1162	16.0581	0.067497		0.108637		0.293137		0.00492804
32.1331	16.0665	0.0672126		0.105793		0.285564		0.00488573
32.1499	16.075	0.0669306		0.103019		0.278177		0.00484224
32.1668	16.0834	0.066651		0.100313		0.270971		0.00479775
32.1836	16.0918	0.066374		0.0976737		0.263942		0.00475252
32.2004	16.1002	0.0660999		0.0951		0.257086		0.00470689
32.2173	16.1086	0.0658288		0.0925904		0.2504		0.0046612
32.2341	16.117	0.0655612		0.0901438		0.24388		0.00461585
32.2509	16.1255	0.065297		0.0877588		0.237522		0.00457116
32.2678	16.1339	0.0650366		0.0854343		0.231323		0.00452747
32.2846	16.1423	0.0647799		0.0831689		0.225278		0.00448505
32.3014	16.1507	0.064527		0.0809614		0.219385		0.0044441
32.3183	16.1591	0.0642778		0.0788108		0.213639		0.0044048
32.3351	16.1675	0.0640323		0.0767157		0.208037		0.00436723
32.3519	16.176	0.0637903		0.074675		0.202576		0.00433145
32.3688	16.1844	0.063552		0.0726875		0.197252		0.00429745
32.3856	16.1928	0.0633173		0.0707521		0.192063		0.00426519
32.4024	16.2012	0.0630863		0.0688676		0.187004		0.00423455
32.4193	16.2096	0.0628594		0.0670328		0.182074		0.00420538
32.4361	16.2181	0.0626366		0.0652467		0.177268		0.00417746
32.4529	16.2265	0.062418		0.063508		0.172583		0.00415052
32.4698	16.2349	0.0622036		0.0618158		0.168018		0.00412422
32.4866	16.2433	0.0619933		0.0601689		0.163568		0.0040982
32.5034	16.2517	0.0617868		0.0585663		0.159231		0.00407203
32.5203	16.2601	0.0615836		0.0570071		0.155004		0.00404529
32.5371	16.2686	0.0613831		0.0554902		0.150883		0.00401754
32.5539	16.277	0.0611847		0.0540148		0.146867		0.00398839
32.5708	16.2854	0.0609878		0.0525799		0.142952		0.00395752
32.5876	16.2938	0.0607918		0.0511848		0.139136		0.00392468
32.6045	16.3022	0.0605962		0.0498285		0.135415		0.00388975
32.6213	16.3106	0.0604011		0.0485103		0.131788		0.00385271
32.6381	16.3191	0.0602065		0.0472293		0.128251		0.00381369
32.655	16.3275	0.0600125		0.0459846		0.124801		0.00377291
32.6718	16.3359	0.0598199		0.0447756		0.121437		0.00373072
32.6886	16.3443	0.0596292		0.0436012		0.118155		0.00368751
32.7055	16.3527	0.0594411		0.0424608		0.114954		0.00364371
32.7223	16.3611	0.0592564		0.0413535		0.111832		0.00359976
32.7391	16.3696	0.0590757		0.0402785		0.108785		0.00355603
32.756	16.378	0.0588995		0.039235		0.105813		0.00351283
32.7728	16.3864	0.0587281		0.0382221		0.102913		0.00347041
32.7896	16.3948	0.0585614		0.0372392		0.100084		0.00342886
32.8065	16.4032	0.0583994		0.0362853		0.0973236		0.00338817
32.8233	16.4116	0.0582415		0.0353598		0.0946314		0.00334824
32.8401	16.4201	0.0580872		0.034462		0.0920059		0.0033089
32.857	16.4285	0.0579358		0.0335911		0.0894458		0.00326986
32.8738	16.4369	0.0577865		0.0327464		0.08695		0.00323083
32.8906	16.4453	0.0576385		0.0319273		0.0845176		0.00319152
32.9075	16.4537	0.0574911		0.0311331		0.0821477		0.00315169
32.9243	16.4622	0.0573438		0.0303632		0.0798392		0.00311115
32.9411	16.4706	0.0571962		0.0296169		0.0775913		0.00306978
32.958	16.479	0.0570483		0.0288935		0.0754032		0.00302759
32.9748	16.4874	0.0569		0.0281924		0.073274		0.00298469
32.9916	16.4958	0.0567519		0.0275128		0.0712029		0.00294126
33.0085	16.5042	0.0566043		0.026854		0.069189		0.00289759
33.0253	16.5127	0.0564579		0.0262153		0.0672315		0.00285396
33.0421	16.5211	0.0563136		0.0255959		0.0653294		0.00281071
33.059	16.5295	0.0561721		0.0249952		0.0634819		0.00276817
33.0758	16.5379	0.056034		0.0244122		0.0616882		0.00272663
33.0927	16.5463	0.0558999		0.0238465		0.0599473		0.00268634
33.1095	16.5547	0.0557703		0.0232972		0.0582584		0.00264747
33.1263	16.5632	0.0556455		0.0227636		0.0566205		0.00261011
33.1432	16.5716	0.0555256		0.0222453		0.0550327		0.0025743
33.16	16.58	0.0554108		0.0217415		0.053494		0.00253998
33.1768	16.5884	0.0553009		0.0212517		0.0520034		0.00250706
33.1937	16.5968	0.0551957		0.0207754		0.05056		0.00247534
33.2105	16.6052	0.0550952		0.0203121		0.0491628		0.00244461
33.2273	16.6137	0.0549991		0.0198612		0.0478107		0.00241457
33.2442	16.6221	0.0549073		0.0194225		0.0465026		0.0023849
33.261	16.6305	0.0548195		0.0189953		0.0452376		0.00235524
33.2778	16.6389	0.0547358		0.0185794		0.0440147		0.00232522
33.2947	16.6473	0.0546559		0.0181744		0.0428326		0.00229448
33.3115	16.6558	0.0545799		0.0177797		0.0416904		0.0022627
33.3283	16.6642	0.0545076		0.0173952		0.0405869		0.00222958
33.3452	16.6726	0.0544391		0.0170203		0.0395212		0.00219492
33.362	16.681	0.0543744		0.0166547		0.0384921		0.0021586
33.3788	16.6894	0.0543135		0.0162981		0.0374985		0.00212061
33.3957	16.6978	0.0542563		0.0159501		0.0365394		0.00208105
33.4125	16.7063	0.0542027		0.0156102		0.0356137		0.0020401
33.4293	16.7147	0.0541527		0.0152781		0.0347203		0.00199807
33.4462	16.7231	0.0541063		0.0149536		0.0338582		0.00195531
33.463	16.7315	0.0540633		0.0146363		0.0330263		0.00191222
33.4798	16.7399	0.0540236		0.0143259		0.0322236		0.00186919
33.4967	16.7483	0.053987		0.0140222		0.0314491		0.0018266
33.5135	16.7568	0.0539533		0.013725		0.0307017		0.00178477
33.5304	16.7652	0.0539222		0.0134342		0.0299803		0.00174397
33.5472	16.7736	0.0538933		0.0131497		0.0292841		0.00170441
33.564	16.782	0.0538662		0.0128714		0.0286118		0.0016662
33.5809	16.7904	0.0538404		0.0125993		0.0279626		0.00162944
33.5977	16.7988	0.0538153		0.0123332		0.0273355		0.00159413
33.6145	16.8073	0.0537901		0.0120733		0.0267295		0.00156026
33.6314	16.8157	0.0537641		0.0118193		0.0261437		0.00152779
33.6482	16.8241	0.0537363		0.0115714		0.0255771		0.0014967
[truncated: 851 more rows]

## Sheet: table
	monomer (kDa)	oligomer (kDa)	multiple	oligomer
FL	17.4	103.2	x5.9	hexamer
IDR	2.3	see Fig. 2S1		monomer
IDR+CC	13.7	27.9	x2.0	dimer
CC	11.4	22.3	x2.0	dimer
CC+CTD	15.1	86.6	x5.7	hexamer
CTD	3.8	see Fig. 2S1		monomer
