# Supplementary material for: Dissecting the phase separation and oligomerization activities of the carboxysome positioning protein McdB
Source: eLife. 2023 Sep 5;12:e81362. doi: 10.7554/eLife.81362 (PMC10554743; doi:10.7554/eLife.81362)
Supplement: Figure 3—source data 1. [file elife-81362-fig3-data1.xlsx]

## Sheet: t30min
							FRAP										FRAP-background										FRAP/(unbleached-background)										x-min										x/max
time	background	unbleached	unbleached-background	background2	unbleached2	unbleached-background2	1	2	3	4	5	6	7	8	9	10	1	2	3	4	5	6	7	8	9	10	1	2	3	4	5	6	7	8	9	10	1	2	3	4	5	6	7	8	9	10	1	2	3
0	362.767	1449.41	1086.64	379.608	1029.04	649.432	1790.58	1601	1468.03	2124.89	1926.89	1217.07	1110.63	1268.46			1354.01	1164.43	1031.46	1688.33	1490.32	837.461	731.022	1088.42			1.24605	1.07159	0.949215	1.55371	1.37149	1.28953	1.12563	1.67595			0.724421	0.606379	0.761947	1.30323	1.12841	0.834089	1.0846	1.40472			1	1	1
4.997	351.676	1439.89	1088.22	367.192	1030.26	663.072	1013.57	942.818	640.359	709.147	701.103	669.181	394.4	547.042			577.003	506.248	203.789	272.577	264.533	301.989	27.208	179.85			0.530227	0.465208	0.187269	0.25048	0.243088	0.455439	0.0410333	0.271238			0.00860088	0	2.498e-16	0	3.33067e-16	0	0	0			0.0118728	0	3.27845e-16
9.995	354.531	1443.31	1088.78	365.325	1030.85	665.52	1004.51	950.015	660.212	721.292	712.636	678.547	418.32	562.826			567.936	513.445	223.642	284.722	276.066	313.222	52.995	197.501			0.521626	0.471579	0.205406	0.261506	0.253556	0.470643	0.0796295	0.296762			0	0.00637045	0.0181377	0.0110256	0.0104673	0.0152033	0.0385962	0.0255244			0	0.0105057	0.0238044
14.992	356.306	1439.32	1083.02	366.617	1030.05	663.434	1017.18	945.985	675.904	730.728	718.869	687.792	432.04	579.201			580.61	509.415	239.334	294.158	282.299	321.175	65.423	212.584			0.536105	0.470367	0.220988	0.27161	0.26066	0.48411	0.0986127	0.32043			0.0144782	0.00515875	0.0337199	0.0211299	0.0175718	0.0286707	0.0575794	0.0491923			0.0199859	0.00850747	0.0442549
19.989	354.331	1433.34	1079.01	367.047	1034.3	667.248	1036.53	958.106	684.968	740.114	727.086	692.919	441.87	588.618			599.956	521.536	248.398	303.544	290.516	325.872	74.823	221.571			0.556026	0.483349	0.23021	0.281318	0.269244	0.488382	0.112137	0.332067			0.0344	0.0181403	0.0429415	0.030838	0.0261559	0.0329429	0.0711035	0.0608294			0.0474862	0.0299158	0.0563576
24.987	352.897	1430.93	1078.03	365.789	1034.69	668.902	1044.8	961.401	684.885	750.75	734.325	702.061	450.06	597.382			608.226	524.831	248.315	314.18	297.755	336.272	84.271	231.593			0.5642	0.486842	0.230341	0.291438	0.276202	0.502722	0.125984	0.346229			0.0425738	0.0216335	0.0430725	0.0409583	0.0331141	0.0472831	0.0849508	0.0749911			0.0587694	0.0356765	0.0565295
29.984	352.065	1434.37	1082.3	367.019	1038.6	671.585	1054.69	968.03	694.083	758.469	740.267	714.533	455.03	613.306			618.116	531.46	257.513	321.899	303.697	347.514	88.011	246.287			0.571112	0.491045	0.237931	0.29742	0.280602	0.517453	0.13105	0.366725			0.0494851	0.0258371	0.050662	0.0469402	0.0375142	0.0620143	0.0900164	0.0954875			0.0683098	0.0426088	0.0664902
34.981	354.247	1436.38	1082.13	371.744	1041	669.258	1059.51	969.879	704.865	764.172	743.844	719.747	461.35	620.785			622.94	533.309	268.295	327.602	307.274	348.003	89.606	249.041			0.575662	0.492833	0.247933	0.302739	0.283953	0.519983	0.133889	0.372115			0.0540353	0.0276251	0.0606641	0.0522584	0.0408651	0.0645441	0.0928553	0.100878			0.074591	0.0455576	0.0796173
39.979	357.084	1479.14	1122.06	372.875	1042.29	669.416	1070.04	981.061	708.955	772.95	748.122	734.797	465.28	630.174			633.473	544.491	272.385	336.38	311.552	361.922	92.405	257.299			0.564564	0.485261	0.242755	0.299789	0.277661	0.540653	0.138038	0.384363			0.0429375	0.0200532	0.0554865	0.0493085	0.0345732	0.0852141	0.097005	0.113126			0.0592714	0.0330704	0.072822
44.976	361.882	1477.56	1115.67	369.842	1039.28	669.442	1077.02	978.894	722.173	777.983	751.014	751.586	472.01	633.264			640.454	542.324	285.603	341.413	314.444	381.744	102.168	263.422			0.574051	0.486095	0.255991	0.306015	0.281842	0.570242	0.152617	0.393495			0.0524243	0.0208868	0.0687227	0.0555347	0.0387538	0.114803	0.111583	0.122257			0.0723672	0.0344452	0.0901936
49.973	360.959	1467.04	1106.08	375.617	1041.97	666.356	1098.88	989.53	718.968	780.1	756.561	788.217	479.23	637.014			662.308	552.96	282.398	343.53	319.991	412.6	103.613	261.397			0.598791	0.49993	0.255315	0.310585	0.289303	0.619189	0.155492	0.392278			0.0771645	0.0347215	0.0680468	0.0601045	0.0462148	0.163749	0.114459	0.121041			0.106519	0.0572604	0.0893065
54.97	364.319	1467.22	1102.9	374.156	1045.94	671.782	1093.87	983.083	728.135	787.586	762.681	772.236	482.21	643.111			657.297	546.513	291.565	351.016	326.111	398.08	108.054	268.955			0.595973	0.495525	0.264363	0.318267	0.295686	0.592573	0.160847	0.400361			0.0743468	0.0303169	0.0770944	0.0677872	0.0525976	0.137134	0.119814	0.129123			0.102629	0.0499965	0.101181
59.968	364.377	1472.9	1108.53	367.592	1051.15	683.554	1090.14	987.189	731.673	794.561	764.319	749.089	490.64	651.826			653.571	550.619	295.103	357.991	327.749	381.497	123.048	284.234			0.589586	0.496713	0.266212	0.322944	0.295662	0.558108	0.180012	0.415818			0.0679596	0.0315049	0.0789437	0.0724634	0.052574	0.102669	0.138979	0.14458			0.0938123	0.0519559	0.103608
64.965	357.771	1471.99	1114.22	366.486	1045.07	678.581	1092.12	997.061	745.814	797.578	769.142	747.786	489.93	657.875			655.555	560.491	309.244	361.008	332.572	381.3	123.444	291.389			0.588353	0.503034	0.277543	0.324	0.298479	0.561908	0.181915	0.429409			0.0667264	0.0378258	0.0902743	0.0735203	0.0553912	0.106469	0.140882	0.158172			0.0921099	0.0623799	0.118478
69.962	354.886	1471.24	1116.35	366.461	1047.37	680.91	1091.41	1009.97	752.205	798.214	771.214	753.997	497.86	666.396			654.842	573.4	315.635	361.644	334.644	387.536	131.399	299.935			0.586591	0.513637	0.282738	0.323951	0.299766	0.569144	0.192976	0.440491			0.0649643	0.0484289	0.0954692	0.0734713	0.0566773	0.113705	0.151942	0.169254			0.0896775	0.0798657	0.125296
74.96	356.817	1467.82	1111	368.525	1041.42	672.899	1092.66	1007.92	753.333	801.719	773.783	760.586	498.69	676.535			656.093	571.347	316.763	365.149	337.213	392.061	130.165	308.01			0.590541	0.514262	0.285115	0.328666	0.303521	0.582645	0.193439	0.457736			0.0689148	0.0490542	0.097846	0.078186	0.0604331	0.127205	0.152406	0.186498			0.0951308	0.080897	0.128416
79.957	359.333	1467.25	1107.91	367.403	1043.85	676.448	1105.37	1012.76	763.788	806.458	776.561	761.883	504.96	682.111			668.803	576.188	327.218	369.888	339.991	394.48	137.557	314.708			0.60366	0.520066	0.295346	0.33386	0.306875	0.583164	0.203352	0.465236			0.0820335	0.0548577	0.108078	0.0833799	0.0637868	0.127725	0.162319	0.193999			0.11324	0.0904677	0.141844
84.954	363.435	1467.75	1104.32	373.167	1048.34	675.169	1111.2	1004.99	769.41	810.206	781.664	770.008	511.95	692.014			674.634	568.422	332.84	373.636	345.094	396.841	138.783	318.847			0.610906	0.514727	0.301399	0.338341	0.312495	0.587765	0.205553	0.472248			0.0892794	0.0495188	0.11413	0.087861	0.0694071	0.132326	0.16452	0.20101			0.123242	0.0816631	0.149788
89.952	368.852	1473.96	1105.1	375.592	1047.98	672.392	1117.59	1021.55	771.442	812.756	784.594	770.844	513.85	701.611			681.018	584.983	334.872	376.186	348.024	395.252	138.258	326.019			0.616248	0.529346	0.303023	0.340408	0.314924	0.58783	0.205621	0.484864			0.0946211	0.0641381	0.115754	0.0899275	0.0718358	0.13239	0.164588	0.213627			0.130616	0.105772	0.151919
94.949	369.515	1469.73	1100.21	375.183	1050.34	675.155	1116.36	1021.11	777.737	818.536	789.406	775.719	523.89	708.66			679.787	584.544	341.167	381.966	352.836	400.536	148.707	333.477			0.617868	0.5313	0.310092	0.347174	0.320698	0.59325	0.220256	0.493927			0.0962416	0.0660922	0.122823	0.0966942	0.0776094	0.137811	0.179223	0.222689			0.132853	0.108995	0.161196
99.946	365.399	1470.82	1105.42	376.417	1051.95	675.538	1127.02	1006.8	777.154	821.047	790.636	781.122	527.47	720.819			690.45	570.233	340.584	384.477	354.066	404.705	151.053	344.402			0.624606	0.515853	0.308105	0.347812	0.320301	0.599085	0.223604	0.509819			0.102979	0.050645	0.120836	0.0973316	0.0772126	0.143646	0.182571	0.238581			0.142154	0.0835204	0.158588
104.944	362.719	1465.3	1102.58	378.253	1049.8	671.549	1128.12	1019.71	773.846	825.7	792.781	787.825	533.29	726.451			691.552	583.142	337.276	389.13	356.211	409.572	155.037	348.198			0.627213	0.528889	0.305897	0.352927	0.323071	0.609891	0.230865	0.5185			0.105587	0.063681	0.118629	0.102447	0.0799826	0.154452	0.189832	0.247262			0.145753	0.105018	0.155692
109.941	362.625	1465.64	1103.02	382.472	1048.45	665.977	1131.68	1015.46	780.346	825.161	791.339	797.478	542.04	733.319			695.112	578.892	343.776	388.591	354.769	415.006	159.568	350.847			0.630191	0.524825	0.311669	0.352298	0.321635	0.623154	0.2396	0.526815			0.108564	0.0596172	0.1244	0.101818	0.0785466	0.167714	0.198567	0.255578			0.149864	0.0983168	0.163266
114.938	364.297	1473.73	1109.43	392.672	1049.85	657.173	1133.84	1021.57	785.756	826.517	799	811.397	547.38	741.458			697.269	584.998	349.186	389.947	362.43	418.725	154.708	348.786			0.628492	0.527295	0.314743	0.351483	0.326681	0.637161	0.235414	0.530737			0.106865	0.0620868	0.127474	0.101003	0.0835924	0.181722	0.194381	0.259499			0.147518	0.102389	0.167301
119.936	363.601	1480.06	1116.46	393.1	1051.23	658.129	1138.96	1013.5	787.404	832.153	799.517	810.542	551.66	746.549			702.395	576.93	350.834	395.583	362.947	417.442	158.56	353.449			0.629126	0.516749	0.314237	0.354319	0.325087	0.634286	0.240925	0.537051			0.1075	0.0515405	0.126969	0.103838	0.0819987	0.178847	0.199892	0.265814			0.148394	0.0849972	0.166637
124.933	364.512	1469.44	1104.93	390.072	1047.86	657.79	1138.23	1026.18	790.756	835.981	804.503	807.153	551.67	755.604			701.661	589.612	354.186	399.411	367.933	417.081	161.598	365.532			0.63503	0.533621	0.320552	0.361482	0.332993	0.634064	0.245668	0.555697			0.113403	0.0684128	0.133283	0.111002	0.089905	0.178625	0.204635	0.28446			0.156543	0.112822	0.174924
129.93	362.899	1473.21	1110.31	385.325	1049.76	664.435	1165.22	1022.63	800.224	839.311	809.881	809.608	554.85	760.979			728.646	586.059	363.654	402.741	373.311	424.283	169.525	375.654			0.656255	0.527834	0.327525	0.362729	0.336223	0.638562	0.255142	0.565374			0.134629	0.0626262	0.140257	0.112249	0.0931346	0.183123	0.214108	0.294136			0.185844	0.103279	0.184077
134.928	360.345	1461.68	1101.33	391.644	1054.66	663.014	1154.19	1040.39	797.481	845.878	815.731	820.703	562.2	767.743			717.622	603.816	360.911	409.308	379.161	429.059	170.556	376.099			0.651594	0.54826	0.327704	0.371648	0.344275	0.647134	0.257243	0.567256			0.129968	0.0830513	0.140435	0.121168	0.101187	0.191695	0.21621	0.296019			0.179409	0.136963	0.184311
139.925	360.969	1457.29	1096.33	389.108	1057.41	668.303	1153.53	1037.77	800.769	850.461	821.233	825.231	569.23	770.597			716.956	601.195	364.199	413.891	384.663	436.123	180.122	381.489			0.653963	0.548373	0.3322	0.377526	0.350866	0.652583	0.269521	0.570832			0.132337	0.0831649	0.144931	0.127046	0.107778	0.197144	0.228488	0.299595			0.182679	0.13715	0.190212
144.922	369.148	1457.12	1087.97	391.389	1057.93	666.546	1153.65	1037.11	810.365	855.547	824.608	831.033	575.41	765.625			717.081	600.536	373.795	418.977	388.038	439.644	184.021	374.236			0.659098	0.551977	0.34357	0.385098	0.356661	0.659585	0.276081	0.561456			0.137471	0.0867683	0.156301	0.134618	0.113573	0.204146	0.235048	0.290218			0.189767	0.143093	0.205134
149.92	368.281	1454.16	1085.88	398.944	1055.67	656.727	1162.59	1038.91	820.59	856.531	825.897	836.592	577.73	772.882			726.018	602.339	384.02	419.961	389.327	437.648	178.786	373.938			0.668601	0.554703	0.35365	0.386749	0.358537	0.666408	0.272238	0.569396			0.146975	0.0894952	0.166381	0.136269	0.115449	0.210969	0.231205	0.298159			0.202886	0.14759	0.218364
154.917	369.767	1449.41	1079.64	405.836	1054.34	648.506	1166.83	1043.86	823.167	861.992	831.458	839.883	586.96	777.618			730.257	607.286	386.597	425.422	394.888	434.047	181.124	371.782			0.676387	0.562487	0.358078	0.394039	0.365757	0.669303	0.279294	0.57329			0.15476	0.0972788	0.17081	0.143559	0.122669	0.213864	0.238261	0.302052			0.213633	0.160426	0.224175
159.914	367.529	1452.2	1084.67	405.961	1056.4	650.441	1168.41	1044.68	820.891	867.228	834.994	837.925	593.95	781.354			731.842	608.112	384.321	430.658	398.424	431.964	187.989	375.393			0.674713	0.560642	0.35432	0.39704	0.367323	0.664109	0.289018	0.577136			0.153087	0.0954338	0.167052	0.14656	0.124234	0.20867	0.247985	0.305899			0.211323	0.157383	0.219243
164.911	370.66	1448.21	1077.55	395.9	1060.32	664.415	1166.55	1049.39	821.288	868.147	836.331	842.306	598.54	786.819			729.975	612.824	384.718	431.577	399.761	446.406	202.64	390.919			0.677438	0.568719	0.35703	0.400516	0.37099	0.671878	0.30499	0.588366			0.155812	0.103511	0.169761	0.150036	0.127902	0.216439	0.263957	0.317128			0.215085	0.170703	0.222799
169.909	369.91	1448.73	1078.82	388.697	1064.24	675.547	1176.24	1051.85	822.397	869.542	839.803	849.058	605.06	793.875			739.669	615.279	385.827	432.972	403.233	460.361	216.363	405.178			0.685626	0.570324	0.357637	0.401337	0.373771	0.681464	0.320278	0.599778			0.163999	0.105116	0.170368	0.150857	0.130683	0.226025	0.279245	0.32854			0.226387	0.17335	0.223596
174.906	366.809	1447.68	1080.87	391.886	1070.57	678.685	1180.56	1061.17	825.186	871.847	843.633	852.911	611.12	800.993			743.987	624.604	388.616	435.277	407.063	461.025	219.234	409.107			0.688323	0.577872	0.35954	0.40271	0.376607	0.679292	0.323028	0.602794			0.166697	0.112664	0.172272	0.15223	0.133519	0.223852	0.281994	0.331556			0.23011	0.185798	0.226094
179.903	367.191	1446.83	1079.64	388.011	1072.54	684.527	1170.18	1059.72	831.994	872.989	845.986	855.286	612.43	807.076			733.61	623.15	395.424	436.419	409.416	467.275	224.419	419.065			0.679498	0.577185	0.366257	0.404228	0.379217	0.682625	0.327845	0.612196			0.157871	0.111977	0.178988	0.153748	0.136129	0.227185	0.286812	0.340959			0.217927	0.184665	0.234909
184.901	366.042	1449.96	1083.92	392.242	1071.84	679.594	1185.69	1059.23	836.68	877.15	849.744	860.167	621.78	812.285			749.124	622.665	400.11	440.58	413.174	467.925	229.538	420.043			0.691123	0.574455	0.369131	0.406468	0.381184	0.688536	0.337758	0.618079			0.169496	0.109247	0.181863	0.155988	0.138096	0.233097	0.296724	0.346842			0.233975	0.180162	0.238682
189.898	371.812	1450.1	1078.29	397.394	1067.93	670.535	1177.87	1065.47	840.686	877.489	857.522	864.356	627.73	819.91			741.297	628.9	404.116	440.919	420.952	466.962	230.336	422.516			0.687474	0.583238	0.374775	0.408906	0.390388	0.696402	0.343511	0.630118			0.165848	0.11803	0.187506	0.158426	0.1473	0.240963	0.302478	0.35888			0.228939	0.194647	0.246088
194.895	372.884	1459.37	1086.49	400.133	1064.79	664.66	1180.08	1073.88	854.038	882.342	858.036	867.328	629.36	829.431			743.512	637.309	417.468	445.772	421.466	467.195	229.227	429.298			0.684325	0.586577	0.384236	0.410287	0.387916	0.702908	0.344879	0.645891			0.162699	0.121368	0.196967	0.159807	0.144827	0.247469	0.303845	0.374654			0.224592	0.200153	0.258505
199.893	373.095	1458.22	1085.12	407.931	1064.6	656.664	1186.97	1059.98	867.532	886.131	861.717	873.272	635.54	835.424			750.399	623.407	430.962	449.561	425.147	465.341	227.609	427.493			0.691533	0.574503	0.397154	0.414294	0.391796	0.708644	0.346614	0.651007			0.169906	0.109295	0.209886	0.163814	0.148707	0.253205	0.305581	0.37977			0.234541	0.180241	0.27546
204.89	375.774	1456.77	1080.99	415.775	1064.7	648.929	1183.8	1074.66	901.224	889.2	868.408	878.347	638.52	844.792			747.23	638.089	464.654	452.63	431.838	462.572	222.745	429.017			0.691243	0.590279	0.429839	0.418716	0.399482	0.712824	0.34325	0.661115			0.169616	0.125071	0.242571	0.168236	0.156394	0.257385	0.302217	0.389878			0.234141	0.206259	0.318356
209.887	383.52	1454.74	1071.22	405.986	1067.81	661.823	1194.18	1074.36	943.564	891.464	871.711	883.333	639.85	847.361			757.61	637.794	506.994	454.894	435.141	477.347	233.864	441.375			0.70724	0.59539	0.473286	0.42465	0.406211	0.721261	0.353363	0.666908			0.185614	0.130182	0.286018	0.17417	0.163122	0.265822	0.31233	0.39567			0.256223	0.214687	0.375378
214.885	391.987	1464.39	1072.4	423.628	1069.4	645.777	1206.81	1075.02	949.82	895.494	877.156	889.686	647.07	853.292			770.242	638.445	513.25	458.924	440.586	466.058	223.442	429.664			0.718238	0.59534	0.478597	0.427939	0.410839	0.721701	0.346005	0.665344			0.196612	0.130131	0.291329	0.177459	0.167751	0.266262	0.304972	0.394107			0.271405	0.214604	0.382348
219.882	393.558	1469.67	1076.11	423.65	1069.52	645.874	1221.82	1078.88	945.282	897.667	881.644	891.786	647.99	859.264			785.246	642.309	508.712	461.097	445.074	468.136	224.34	435.614			0.729706	0.596879	0.472731	0.428484	0.413594	0.72481	0.347343	0.674457			0.20808	0.131671	0.285463	0.178004	0.170506	0.269371	0.30631	0.403219			0.287236	0.217143	0.374649
224.879	393.511	1467.08	1073.57	405.361	1068.52	663.154	1235.23	1083.57	950.359	897.581	885.517	900.106	653.24	869.486			798.661	646.998	513.789	461.011	448.947	494.745	247.879	464.125			0.743929	0.60266	0.47858	0.429418	0.418181	0.746048	0.373788	0.699875			0.222303	0.137452	0.291311	0.178938	0.175093	0.290609	0.332755	0.428638			0.30687	0.226676	0.382324
229.877	394.336	1485.28	1090.94	407.233	1071.62	664.385	1246.74	1083.98	959.006	903.842	888.469	909.397	657.9	868.861			810.175	647.415	522.436	467.272	451.899	502.164	250.667	461.628			0.742638	0.593446	0.478885	0.42832	0.414228	0.755833	0.377292	0.69482			0.221012	0.128238	0.291617	0.17784	0.17114	0.300394	0.336259	0.423583			0.305087	0.211481	0.382726
234.874	392.767	1487.07	1094.31	406.2	1064.57	658.365	1237.62	1089.8	969.699	903.9	891.992	907.192	662.87	881.66			801.046	653.225	533.129	467.33	455.422	500.992	256.67	475.46			0.732012	0.596931	0.487184	0.427056	0.416174	0.760964	0.38986	0.722183			0.210386	0.131722	0.299916	0.176576	0.173086	0.305525	0.348826	0.450945			0.290419	0.217228	0.393618
239.871	391.68	1474.66	1082.98	407.497	1066.07	658.576	1264.29	1098.79	973.064	907.133	895.164	910.825	665.32	891.181			827.716	662.218	536.494	470.563	458.594	503.328	257.823	483.684			0.764293	0.611476	0.495385	0.434506	0.423454	0.764267	0.391486	0.734439			0.242666	0.146268	0.308117	0.184026	0.180366	0.308828	0.350452	0.463202			0.334979	0.241215	0.404381
244.869	390.813	1468.26	1077.45	402.775	1064.69	661.918	1266.17	1102.6	971.077	911.458	899.167	914.306	672.47	908.882			829.603	666.029	534.507	474.888	462.597	511.531	269.695	506.107			0.769972	0.618155	0.496087	0.440754	0.429346	0.772801	0.407445	0.764607			0.248345	0.152947	0.308819	0.190273	0.186258	0.317362	0.366411	0.493369			0.342819	0.25223	0.405302
249.866	391.302	1464.93	1073.62	398.344	1066.74	668.401	1261.8	1105.49	974.244	919.978	904.681	914.244	674.15	931.062			825.234	668.922	537.674	483.408	468.111	515.9	275.806	532.718			0.768643	0.623051	0.500803	0.450258	0.43601	0.771842	0.412636	0.797004			0.247017	0.157842	0.313534	0.199778	0.192922	0.316403	0.371602	0.525766			0.340985	0.260303	0.411491
254.863	392.325	1471.21	1078.88	398.267	1069.03	670.766	1266.72	1104.52	969.744	926.319	912.047	916.572	679.33	936.854			830.155	667.945	533.174	489.749	475.477	518.305	281.063	538.587			0.769458	0.619108	0.494191	0.453941	0.440713	0.772706	0.419018	0.802943			0.247832	0.1539	0.306922	0.203461	0.197624	0.317267	0.377985	0.531706			0.34211	0.253802	0.402813
259.861	392.847	1476.72	1083.87	397.614	1066.46	668.851	1268.78	1110.11	978.096	928.322	913.85	914.128	682.21	919.368			832.206	673.544	541.526	491.752	477.28	516.514	284.596	521.754			0.767809	0.621425	0.499622	0.4537	0.440348	0.772241	0.4255	0.780075			0.246183	0.156216	0.312354	0.20322	0.197259	0.316802	0.384467	0.508838			0.339834	0.257622	0.409942
264.858	393.682	1470.71	1077.03	397.192	1070.2	673.006	1276.66	1110.95	987.263	933.644	918.283	917.819	689.42	940.785			840.089	674.385	550.693	497.074	481.713	520.627	292.228	543.593			0.780007	0.626154	0.511308	0.461524	0.447262	0.773584	0.434213	0.807709			0.258381	0.160946	0.32404	0.211044	0.204173	0.318145	0.39318	0.536471			0.356672	0.265421	0.425279
269.855	393.276	1475.28	1082	398.286	1070.94	672.659	1283.11	1114.35	983.212	941.181	926.792	920.761	693.4	939.264			846.54	677.779	546.642	504.611	490.222	522.475	295.114	540.978			0.782385	0.626414	0.505215	0.466369	0.453071	0.776731	0.438727	0.804238			0.260759	0.161206	0.317946	0.215889	0.209982	0.321292	0.397694	0.533001			0.359955	0.26585	0.417282
274.852	396.169	1489.42	1093.25	398.425	1074.29	675.86	1292.18	1117.33	992.981	942.442	933.067	925.714	697.77	927.028			855.607	680.756	556.411	505.872	496.497	527.289	299.345	528.603			0.782626	0.622689	0.508951	0.462723	0.454147	0.780175	0.44291	0.782119			0.261	0.157481	0.321682	0.212242	0.211059	0.324736	0.401877	0.510882			0.360287	0.259708	0.422185
279.85	395.234	1494.99	1099.76	397.417	1075.81	678.39	1299.2	1118.52	988	947.681	939.067	930.386	700.36	933.854			862.626	681.945	551.43	511.111	502.497	532.969	302.943	536.437			0.784378	0.620086	0.50141	0.464749	0.456916	0.785638	0.446562	0.79075			0.262751	0.154878	0.314142	0.214268	0.213828	0.330199	0.405528	0.519513			0.362705	0.255415	0.412288
284.847	391.961	1484.71	1092.75	397.672	1076.42	678.748	1292.68	1123.98	995.526	951.503	943.544	932.619	704.67	932.444			856.108	687.415	558.956	514.933	506.974	534.947	306.998	534.772			0.783442	0.629067	0.511512	0.471226	0.463942	0.788138	0.4523	0.78788			0.261815	0.163859	0.324243	0.220745	0.220854	0.332699	0.411267	0.516643			0.361413	0.270225	0.425546
289.844	394.85	1485.38	1090.53	399.275	1073.16	673.889	1289.04	1125.42	999.968	953.475	948.464	939.819	708.06	940.667			852.469	688.854	563.398	516.905	511.894	540.544	308.785	541.392			0.781701	0.631669	0.516628	0.473994	0.469399	0.802126	0.458213	0.803385			0.260075	0.166461	0.329359	0.223514	0.226311	0.346687	0.41718	0.532147			0.359011	0.274516	0.43226
294.842	401.527	1480.99	1079.46	399.275	1076.56	677.283	1293.68	1129.17	1003.53	964.058	959.364	936.756	715.05	942.806			857.112	692.597	566.956	527.488	522.794	537.481	315.775	543.531			0.794018	0.641614	0.525221	0.488659	0.48431	0.793584	0.466238	0.802517			0.272392	0.176405	0.337953	0.238178	0.241222	0.338145	0.425205	0.531279			0.376013	0.290916	0.443538
299.839	401.088	1474.83	1073.74	402.3	1075.63	673.333	1291.36	1128.49	1003.72	966.75	961.072	941.222	721.14	944.201			854.791	691.922	567.154	530.18	524.502	538.922	318.84	541.901			0.796085	0.644402	0.528203	0.493768	0.48848	0.80038	0.473525	0.804804			0.274459	0.179194	0.340934	0.243288	0.245392	0.34494	0.432492	0.533566			0.378866	0.295514	0.447451
304.836	396.699	1476.57	1079.87	404.9	1075.55	670.651	1284.71	1134.77	1000.21	968.828	965.689	949.117	719.97	952.292			848.144	698.195	563.642	532.258	529.119	544.217	315.07	547.392			0.78541	0.646553	0.521952	0.492889	0.489982	0.811476	0.469797	0.81621			0.263784	0.181344	0.334683	0.242409	0.246894	0.356036	0.428764	0.544972			0.364131	0.299061	0.439248
309.834	401.408	1474.65	1073.24	404.175	1077.48	673.307	1279.23	1129.87	1009.33	972.539	968.686	954.033	729.44	952.882			842.661	693.301	572.757	535.969	532.116	549.858	325.265	548.707			0.785157	0.645989	0.533672	0.499394	0.495804	0.816653	0.483086	0.814943			0.263531	0.180781	0.346403	0.248914	0.252716	0.361214	0.442052	0.543706			0.363781	0.298133	0.454629
314.831	398.454	1483.14	1084.69	404.428	1077.04	672.607	1270.44	1130.19	1008.99	974.153	975.078	960.392	735.06	959.208			833.869	693.619	572.424	537.583	538.508	555.964	330.632	554.78			0.768762	0.639462	0.52773	0.495609	0.496462	0.826581	0.491568	0.82482			0.247135	0.174254	0.340462	0.245129	0.253374	0.371142	0.450535	0.553583			0.341149	0.287368	0.446831
319.828	401.38	1478.23	1076.85	403.653	1081.54	677.885	1281.59	1131.17	1008.37	975.544	978.3	961.772	739.77	964.618			845.018	694.604	571.802	538.974	541.73	558.119	336.117	560.965			0.78471	0.645031	0.530993	0.500508	0.503067	0.823324	0.495832	0.827522			0.263083	0.179822	0.343724	0.250028	0.259979	0.367885	0.454799	0.556285			0.363163	0.296551	0.451113
324.826	402.119	1475.11	1072.99	403.478	1079.36	675.882	1285.16	1144.08	1011.05	981.281	986.786	965.072	745.42	974.521			848.591	707.513	574.481	544.711	550.216	561.594	341.942	571.043			0.790865	0.659384	0.535402	0.507657	0.512787	0.830905	0.50592	0.844886			0.269239	0.194176	0.348133	0.257177	0.269699	0.375466	0.464886	0.573648			0.37166	0.320222	0.456899
329.823	407.668	1474.05	1066.38	400.475	1079.01	678.53	1286.97	1150.46	1014.37	987.725	993.722	961.994	751.31	973.243			850.403	713.892	577.795	551.155	557.152	561.519	350.835	572.768			0.797468	0.669454	0.541829	0.516847	0.522471	0.827552	0.517052	0.844131			0.275842	0.204246	0.35456	0.266367	0.279383	0.372113	0.476018	0.572893			0.380775	0.336829	0.465335
334.82	415.015	1472.49	1057.48	400.506	1078.79	678.285	1290.21	1150.02	1018.72	990.639	996.647	964.172	758.67	977.375			853.642	713.445	582.148	554.069	560.077	563.666	358.164	576.869			0.807245	0.674668	0.550508	0.523955	0.529636	0.831016	0.528044	0.850482			0.285619	0.20946	0.363239	0.273474	0.286548	0.375577	0.48701	0.579244			0.394272	0.345428	0.476725
339.818	419.221	1473.14	1053.92	399.128	1078.26	679.134	1288.99	1162.39	1016.42	995.139	1002.91	969.111	764.88	986.194			852.418	725.824	579.847	558.569	566.338	569.983	365.752	587.066			0.808807	0.68869	0.550181	0.529992	0.537363	0.839279	0.538556	0.864433			0.287181	0.223482	0.362913	0.279512	0.294275	0.38384	0.497523	0.593196			0.396428	0.368551	0.476297
344.815	423.161	1471.44	1048.28	402.592	1081.07	678.473	1285.33	1161.73	1020	996.336	1003.18	976.886	774.34	987.528			848.759	725.165	583.43	559.766	566.611	574.294	371.748	584.936			0.80967	0.691768	0.55656	0.533986	0.540516	0.846451	0.547919	0.862136			0.288043	0.22656	0.369292	0.283506	0.297428	0.391012	0.506885	0.590898			0.397618	0.373627	0.484669
349.812	421.689	1479.13	1057.44	402.35	1084.64	682.292	1299.83	1161.87	1022.26	995.692	1010.67	983.358	787.1	993.458			863.261	725.301	585.693	559.122	574.099	581.008	384.75	591.108			0.816366	0.6859	0.553876	0.528749	0.542912	0.851553	0.563908	0.866356			0.294739	0.220692	0.366608	0.278269	0.299824	0.396114	0.522875	0.595119			0.406862	0.363951	0.481146
354.81	418.328	1489.29	1070.96	402.647	1087.38	684.729	1290.72	1179.64	1029.9	996.597	1012.81	984.058	790.84	994.174			854.152	743.074	593.327	560.027	576.241	581.411	388.193	591.527			0.797559	0.693841	0.554015	0.522922	0.538061	0.849111	0.566929	0.863885			0.275932	0.228632	0.366747	0.272441	0.294973	0.393672	0.525896	0.592647			0.380901	0.377045	0.481328
359.807	433.033	1491.96	1058.92	403.3	1084.73	681.431	1290.67	1186.86	1032.85	1002.55	1018.3	986.797	807.93	996.118			854.105	750.286	596.283	565.98	581.727	583.497	404.63	592.818			0.806578	0.708536	0.563103	0.534486	0.549357	0.856282	0.593795	0.86996			0.284952	0.243328	0.375834	0.284006	0.306268	0.400843	0.552761	0.598723			0.393351	0.40128	0.493255
364.804	432.541	1485.41	1052.87	404.881	1089.44	684.564	1294.33	1194.87	1035.02	1009.55	1025.74	987.775	787.18	998.618			857.763	758.301	598.449	572.983	589.172	582.894	382.299	593.737			0.814693	0.720225	0.5684	0.544212	0.559589	0.851482	0.558456	0.867321			0.293067	0.255017	0.381131	0.293732	0.3165	0.396043	0.517423	0.596084			0.404553	0.420557	0.500207
369.802	417.985	1488.55	1070.56	403.35	1090.32	686.974	1305.72	1203.96	1033.02	1013.65	1029.18	986.589	791.35	1006.67			869.155	767.392	596.449	577.083	592.608	583.239	388	603.317			0.811867	0.716811	0.557136	0.539046	0.553548	0.848997	0.564796	0.878224			0.29024	0.251603	0.369867	0.288566	0.310459	0.393558	0.523763	0.606986			0.400651	0.414927	0.485424
374.799	408.899	1483.89	1074.99	402.597	1094.33	691.728	1310.78	1206.2	1037.63	1021.36	1033.05	987.594	809.29	1005.14			874.206	769.627	601.065	584.794	596.477	584.997	406.693	602.542			0.813222	0.715938	0.559135	0.543999	0.554867	0.845704	0.587938	0.871068			0.291596	0.25073	0.371867	0.293519	0.311779	0.390265	0.546904	0.59983			0.402522	0.413488	0.488048
379.796	403.094	1483.91	1080.82	404.378	1092.36	687.978	1308.75	1211.98	1037.99	1018.91	1036.4	994.019	828.1	1005.5			872.183	775.407	601.417	582.344	599.827	589.641	423.722	601.122			0.806965	0.717425	0.556445	0.538799	0.554974	0.857064	0.615895	0.873752			0.285338	0.252217	0.369177	0.288318	0.311886	0.401625	0.574861	0.602514			0.393884	0.415939	0.484518
384.793	409.614	1484.23	1074.61	404.642	1099.29	694.643	1316.61	1204.35	1044.3	1022.8	1040.6	1002.56	840.15	1010.41			880.042	767.779	607.725	586.233	604.033	597.914	435.508	605.768			0.818939	0.714471	0.565529	0.54553	0.562094	0.86075	0.626952	0.872057			0.297312	0.249262	0.378261	0.29505	0.319006	0.405311	0.585919	0.600819			0.410414	0.411067	0.49644
389.791	409.416	1483.69	1074.28	402.914	1099.62	696.71	1316.26	1202.5	1049.63	1027.74	1046.58	1003.12	825.64	1017.74			879.693	765.93	613.058	591.166	610.008	600.203	422.726	614.829			0.818869	0.712972	0.57067	0.550291	0.567831	0.861482	0.606746	0.882475			0.297242	0.247764	0.383401	0.299811	0.324742	0.406043	0.565713	0.611237			0.410317	0.408595	0.503186
394.788	413.775	1494.4	1080.63	404.756	1094.14	689.384	1321.75	1211.42	1056.04	1034.46	1052.19	1004.57	815.19	1018.67			885.179	774.854	619.468	597.886	615.616	599.816	410.434	613.911			0.819133	0.71704	0.573248	0.553276	0.569683	0.870075	0.595363	0.890521			0.297507	0.251832	0.385979	0.302796	0.326595	0.414636	0.55433	0.619284			0.410682	0.415304	0.50657
399.785	416.048	1498.11	1082.07	408.967	1093.57	684.6	1322.71	1212.77	1060.15	1036.83	1054.38	1010.58	829.07	1018.77			886.136	776.195	623.584	600.258	617.808	601.611	420.103	609.804			0.81893	0.717327	0.57629	0.554733	0.570952	0.878777	0.613647	0.890745			0.297303	0.252119	0.389022	0.304253	0.327864	0.423338	0.572614	0.619507			0.410401	0.415778	0.510563
404.783	416.828	1496.01	1079.18	408.992	1094.3	685.308	1326.31	1206.54	1063.9	1033.06	1056.79	1014.59	824.02	1033.99			889.736	769.968	627.334	596.494	620.224	605.594	415.028	625.001			0.824455	0.713475	0.581306	0.552729	0.574718	0.883681	0.605608	0.912			0.302829	0.248267	0.394038	0.302249	0.331629	0.428242	0.564575	0.640763			0.418029	0.409425	0.517146
409.78	422.261	1509.4	1087.13	407.217	1095.37	688.156	1334.55	1204.77	1074.99	1072.81	1062.65	1016.89	818.26	1031.51			897.975	768.203	638.424	636.244	626.08	609.675	411.043	624.297			0.826002	0.706631	0.587254	0.585249	0.575899	0.885955	0.597311	0.907203			0.304375	0.241423	0.399985	0.334768	0.332811	0.430515	0.556278	0.635965			0.420163	0.398139	0.524952
414.777	415.506	1506.65	1091.15	408.628	1103.86	695.232	1337.67	1211.23	1063.85	1068.52	1073.43	1017.94	817.35	1033.99			901.105	774.657	627.283	631.952	636.861	609.314	408.722	625.365			0.825834	0.709949	0.574885	0.579164	0.583663	0.876418	0.587893	0.899505			0.304208	0.24474	0.387616	0.328684	0.340575	0.420979	0.54686	0.628268			0.419932	0.40361	0.508718
419.775	414.04	1507.87	1093.83	424.456	1105.9	681.449	1345.81	1214.84	1069.82	1061.02	1074.65	1031.29	823.83	1041.84			909.242	778.271	633.251	624.449	638.083	606.836	399.374	617.384			0.831246	0.71151	0.57893	0.570883	0.583347	0.890508	0.586066	0.905987			0.309619	0.246301	0.391661	0.320403	0.340259	0.435069	0.545033	0.63475			0.427402	0.406184	0.514027
424.772	410.635	1502.22	1091.58	433.319	1108.17	674.854	1346.07	1214.36	1076.08	1064.38	1083.77	1040.83	823.59	1045.4			909.501	777.794	639.507	627.808	647.197	607.506	390.271	612.077			0.833196	0.712539	0.585854	0.575137	0.592899	0.900204	0.578304	0.906977			0.31157	0.247331	0.398586	0.324657	0.349811	0.444764	0.537271	0.635739			0.430095	0.407882	0.523115
429.769	413.375	1499.03	1085.66	441.458	1111.55	670.087	1357.81	1221.45	1084.71	1066.34	1090.26	1060.58	827.83	1047.06			921.242	784.877	648.142	629.766	653.686	619.12	386.372	605.598			0.848558	0.722952	0.597005	0.580079	0.602112	0.92394	0.5766	0.90376			0.326932	0.257744	0.409736	0.329599	0.359023	0.4685	0.535567	0.632523			0.4513	0.425054	0.537749
434.767	420.486	1504.6	1084.11	439.942	1117.85	677.907	1356.02	1227.24	1083.09	1069.86	1097.78	1070.5	833.9	1047.8			919.446	790.672	646.52	633.288	661.211	630.555	393.958	607.857			0.848108	0.729326	0.596358	0.584153	0.609909	0.93015	0.581139	0.896667			0.326482	0.264117	0.409089	0.333673	0.366821	0.47471	0.540105	0.62543			0.45068	0.435565	0.5369
439.764	422.754	1500.45	1077.69	434.861	1115.75	680.89	1344.8	1232.83	1090.85	1074.76	1098.86	1058.13	837.39	1054.19			908.226	796.256	654.283	638.186	662.291	623.267	402.529	619.333			0.842751	0.738853	0.607115	0.592178	0.614545	0.915371	0.591181	0.909593			0.321124	0.273644	0.419846	0.341698	0.371457	0.459932	0.550147	0.638356			0.443284	0.451276	0.551018
444.761	417.237	1497.46	1080.23	426.772	1106.84	680.072	1333.61	1236.05	1079.81	1079.71	1108.59	1048.24	834.78	1055.9			897.038	799.475	643.244	643.136	672.019	621.472	408.008	629.131			0.830417	0.7401	0.595472	0.595372	0.62211	0.913833	0.599948	0.925095			0.30879	0.274891	0.408203	0.344891	0.379021	0.458393	0.558915	0.653857			0.426258	0.453333	0.535737
449.759	422.935	1492.01	1069.07	426.347	1112.36	686.015	1326.67	1230.56	1089.42	1080.24	1113.72	1054.42	843.25	1058.02			890.105	793.991	652.847	643.666	677.147	628.078	416.903	631.674			0.832595	0.742691	0.610666	0.602079	0.633396	0.915546	0.607717	0.920787			0.310969	0.277483	0.423398	0.351598	0.390308	0.460106	0.566684	0.64955			0.429265	0.457606	0.555679
454.756	420.206	1487.82	1067.61	427.242	1111.38	684.136	1332.53	1234.9	1088.46	1078.61	1114.86	1054.84	850.83	1057			895.963	798.331	651.892	642.041	678.286	627.594	423.588	629.758			0.83922	0.747772	0.610607	0.60138	0.635329	0.917353	0.619158	0.920516			0.317594	0.282563	0.423338	0.350899	0.392241	0.461913	0.578124	0.649278			0.438411	0.465985	0.555601
459.753	421.252	1479.75	1058.5	426.564	1116.89	690.331	1347.6	1242.05	1092.07	1080.62	1116.43	1058.44	852.42	1057.08			911.026	805.475	655.501	644.047	679.861	631.872	425.856	630.512			0.860676	0.760959	0.619273	0.608452	0.642287	0.915317	0.616887	0.913347			0.33905	0.29575	0.432005	0.357972	0.399199	0.459878	0.575853	0.64211			0.468028	0.487732	0.566975
464.751	420.129	1487.02	1066.89	423.417	1119.63	696.21	1346.37	1245.64	1091.55	1085.17	1118.83	1062.56	858.05	1065.42			909.799	809.066	654.975	648.599	682.261	639.139	434.633	642			0.852758	0.75834	0.61391	0.607934	0.639485	0.918026	0.624284	0.922136			0.331131	0.293132	0.426642	0.357454	0.396397	0.462587	0.583251	0.650898			0.457097	0.483414	0.559936
469.748	420.047	1484.8	1064.75	425.217	1121.58	696.359	1359.06	1252.98	1094.99	1095.71	1126.03	1064.01	858.18	1074.21			922.485	816.407	658.417	659.144	689.455	638.791	432.963	648.998			0.866387	0.76676	0.618378	0.619061	0.647528	0.91733	0.621753	0.931988			0.344761	0.301552	0.431109	0.36858	0.40444	0.461891	0.580719	0.66075			0.475912	0.4973	0.5658
474.745	423.169	1486.33	1063.16	423.097	1126.04	702.945	1351.81	1260.08	1095.97	1094.47	1125.38	1064.44	866.71	1069.67			915.242	823.506	659.398	657.899	688.805	641.342	443.613	646.577			0.86087	0.774583	0.620225	0.618815	0.647885	0.912364	0.631078	0.919812			0.339243	0.309375	0.432956	0.368335	0.404796	0.456925	0.590045	0.648574			0.468295	0.510201	0.568224
479.742	428.195	1492.22	1064.03	421.819	1127.83	706.014	1360.54	1260.7	1094.66	1095.97	1127.22	1066.47	872.54	1074.93			923.967	824.127	658.09	659.399	690.655	644.656	450.721	653.112			0.86837	0.774537	0.618491	0.619721	0.649097	0.913092	0.638402	0.925069			0.346743	0.309329	0.431223	0.369241	0.406008	0.457653	0.597369	0.653832			0.478649	0.510125	0.565948
484.74	424.98	1492.62	1067.64	421.731	1132.35	710.614	1355.71	1256.98	1104.74	1095.88	1133.35	1069.76	876.96	1082.99			919.136	820.415	668.167	659.311	696.78	648.025	455.229	661.262			0.860908	0.768441	0.625838	0.617543	0.652638	0.911923	0.640614	0.93055			0.339282	0.303233	0.43857	0.367063	0.40955	0.456483	0.59958	0.659313			0.468348	0.500072	0.575591
489.737	422.639	1492.52	1069.88	421.297	1133.14	711.845	1382.45	1263.01	1104.2	1099.84	1132.95	1075.04	883.89	1080.41			945.881	826.438	667.635	663.266	696.38	653.742	462.593	659.113			0.884101	0.77246	0.624029	0.619945	0.650896	0.918377	0.649851	0.925922			0.362475	0.307251	0.43676	0.369465	0.407808	0.462938	0.608817	0.654685			0.500365	0.506699	0.573216
494.734	418.411	1485.34	1066.93	422.897	1129.7	706.799	1391.37	1259.27	1112.18	1106.03	1144.49	1074.36	879.24	1081.04			954.795	822.695	675.609	669.458	707.924	651.459	456.343	658.138			0.8949	0.771087	0.633227	0.627462	0.663515	0.921703	0.645647	0.931153			0.373273	0.305878	0.445959	0.376982	0.420427	0.466264	0.604614	0.659915			0.515271	0.504434	0.585289
499.732	418.264	1479.61	1061.35	421.728	1126.45	704.727	1386.46	1280.47	1120.42	1111.4	1146.94	1083.57	884.95	1089.3			949.889	843.9	683.847	674.83	710.369	661.841	463.222	667.571			0.894984	0.795121	0.64432	0.635824	0.669309	0.939145	0.657307	0.947276			0.373357	0.329913	0.457051	0.385344	0.42622	0.483706	0.616274	0.676039			0.515387	0.544071	0.599846
504.729	421.3	1470.53	1049.23	424.267	1126.57	702.302	1385.06	1292.89	1122.36	1115.42	1150.91	1082.24	883.83	1090.48			948.485	856.324	685.789	678.849	714.336	657.972	459.563	666.212			0.903985	0.816148	0.653614	0.647	0.680822	0.936879	0.654367	0.948612			0.382359	0.35094	0.466345	0.39652	0.437733	0.48144	0.613333	0.677374			0.527813	0.578747	0.612045
509.726	413.481	1470.68	1057.2	421.528	1134.1	712.574	1387.51	1284.23	1127.17	1112.31	1151.43	1081.19	890.5	1093.76			950.94	847.657	690.597	675.738	714.861	659.661	468.972	672.236			0.899489	0.801794	0.653232	0.639177	0.676183	0.925744	0.658138	0.943391			0.377862	0.336586	0.465963	0.388697	0.433095	0.470305	0.617105	0.672154			0.521606	0.555075	0.611543
514.724	415.457	1471.19	1055.73	421.397	1134.34	712.943	1383.01	1284.22	1130.72	1118.81	1157.55	1083.46	894.18	1098.92			946.438	847.65	694.154	682.244	720.983	662.059	472.783	677.527			0.896473	0.802901	0.657508	0.646227	0.682921	0.928628	0.663143	0.950324			0.374847	0.337692	0.47024	0.395747	0.439832	0.473189	0.62211	0.679087			0.517443	0.5569	0.617155
519.721	414.201	1470.68	1056.48	423.808	1134	710.188	1390.4	1288	1134.71	1122.58	1157.45	1086.66	897.65	1104.69			953.83	851.43	698.142	686.005	720.88	662.856	473.842	680.88			0.90284	0.805914	0.660821	0.649333	0.682343	0.933353	0.667206	0.958732			0.381214	0.340706	0.473552	0.398853	0.439255	0.477914	0.626173	0.687495			0.526232	0.56187	0.621503
524.718	423.558	1467.7	1044.14	421.133	1135.72	714.587	1388.22	1271.7	1134.92	1124.41	1162.36	1087.07	901.85	1104.95			951.65	835.135	698.353	687.841	725.786	665.939	480.717	683.818			0.91142	0.799831	0.668831	0.658763	0.695104	0.931922	0.67272	0.956942			0.389794	0.334622	0.481562	0.408283	0.452016	0.476482	0.631687	0.685704			0.538076	0.551837	0.632016
529.716	423.646	1468.26	1044.62	422.119	1133.99	711.876	1386.98	1280.79	1152.63	1120.76	1157.74	1088.18	917.35	1112.97			950.414	844.218	716.065	684.186	721.169	666.059	495.231	690.853			0.909821	0.80816	0.685481	0.654964	0.690367	0.935639	0.69567	0.970468			0.388194	0.342952	0.498212	0.404483	0.447279	0.4802	0.654637	0.699231			0.535868	0.565574	0.653868
534.713	423.498	1467.4	1043.9	422.269	1133.99	711.724	1384.93	1272.69	1179.97	1127.12	1165.26	1094.22	926.68	1119.04			948.359	836.119	743.404	690.549	728.688	671.956	504.411	696.766			0.908475	0.800955	0.71214	0.661507	0.698042	0.944124	0.708717	0.978983			0.386848	0.335747	0.524871	0.411027	0.454954	0.488685	0.667684	0.707746			0.53401	0.553692	0.688855
539.71	425.186	1465.56	1040.37	421.136	1136.75	715.611	1402.5	1276.69	1188.01	1128.28	1164.73	1099.01	933.04	1120.17			965.932	840.119	751.443	691.705	728.158	677.875	511.904	699.038			0.928449	0.807519	0.722284	0.664864	0.699902	0.947267	0.715338	0.976841			0.406823	0.34231	0.535015	0.414384	0.456814	0.491828	0.674305	0.705603			0.561583	0.564516	0.702168
544.708	423.987	1460.37	1036.38	420.144	1142.27	722.125	1395.88	1276.14	1191.28	1138.29	1177.41	1101.7	953.76	1122.99			959.308	839.566	754.712	701.716	740.836	681.559	533.616	702.849			0.925635	0.810096	0.728221	0.677085	0.714832	0.943824	0.738952	0.973307			0.404009	0.344888	0.540952	0.426605	0.471743	0.488385	0.697919	0.702069			0.557698	0.568766	0.70996
549.705	422.735	1456.7	1033.96	419.242	1142.88	723.634	1409.78	1272.9	1192.39	1150.11	1188.7	1104.07	978.43	1123.2			973.214	836.331	755.821	713.544	752.13	684.83	559.188	703.959			0.941247	0.80886	0.730994	0.690106	0.727425	0.946376	0.77275	0.972811			0.41962	0.343652	0.543726	0.439626	0.484336	0.490937	0.731717	0.701573			0.579249	0.566728	0.713601
554.702	419.502	1457.09	1037.59	418.325	1146.61	728.282	1425.93	1273.49	1189.64	1147.31	1184.03	1109.51	940.67	1140.92			989.363	836.922	753.071	710.736	747.461	691.183	522.345	722.592			0.953522	0.806603	0.72579	0.684989	0.720383	0.94906	0.717229	0.992187			0.431895	0.341395	0.538521	0.434508	0.477295	0.49362	0.676196	0.72095			0.596194	0.563006	0.70677
559.7	415.578	1453.02	1037.44	418.356	1149.1	730.748	1418.86	1265.98	1187.12	1149.27	1190.34	1112.91	937.33	1161.79			982.293	829.407	750.552	712.697	753.772	694.555	518.974	743.436			0.946841	0.799473	0.723464	0.686975	0.726568	0.950471	0.710196	1.01736			0.425215	0.334265	0.536195	0.436495	0.483479	0.495032	0.669162	0.746126			0.586972	0.551247	0.703718
564.697	418.958	1456.99	1038.03	418.672	1152.8	734.123	1424.85	1270.85	1191.97	1160.75	1198.22	1116.78	933.17	1168.78			988.281	834.279	755.404	724.177	761.655	698.109	514.498	750.106			0.95207	0.803711	0.727726	0.697643	0.733748	0.950943	0.700834	1.02177			0.430444	0.338503	0.540457	0.447163	0.49066	0.495504	0.6598	0.750534			0.59419	0.558236	0.709311
569.694	423.514	1461.2	1037.69	417.517	1158.82	741.298	1419.44	1272.94	1198.45	1164.39	1202.89	1119.15	940.85	1186.05			982.869	836.369	761.879	727.819	766.324	701.63	523.333	768.532			0.94717	0.805991	0.734207	0.701384	0.73849	0.946488	0.705968	1.03674			0.425543	0.340783	0.546938	0.450904	0.495402	0.491049	0.664935	0.765501			0.587425	0.561997	0.717816
574.692	426.404	1462.44	1036.04	418.042	1164.4	746.358	1431.37	1272.86	1203.93	1167.84	1206.21	1122.26	949.21	1227.41			994.799	836.286	767.359	731.272	769.636	704.216	531.168	809.368			0.960195	0.807196	0.740666	0.705835	0.742864	0.943536	0.71168	1.08442			0.438568	0.341987	0.553398	0.455354	0.499776	0.488097	0.670647	0.813186			0.605405	0.563983	0.726294
579.689	431.524	1458.4	1026.88	418.697	1170.55	751.852	1432.81	1270.66	1201.34	1160.34	1197.11	1123.14	948.71	1266.05			996.242	834.089	764.77	723.766	760.541	704.439	530.013	847.352			0.970164	0.812256	0.744751	0.704821	0.740633	0.936938	0.704943	1.12702			0.448538	0.347048	0.557483	0.454341	0.497545	0.481499	0.66391	0.855782			0.619167	0.572328	0.731656
584.686	431.92	1461.45	1029.53	417.65	1171.2	753.555	1434.98	1275.39	1213.51	1162.35	1199.77	1124.53	954.94	1264.6			998.414	838.816	776.943	725.78	763.199	706.883	537.29	846.954			0.969776	0.814756	0.754658	0.704962	0.741308	0.938064	0.713007	1.12394			0.44815	0.349548	0.567389	0.454482	0.49822	0.482625	0.671974	0.852707			0.618631	0.576451	0.744657
589.683	445.133	1462.38	1017.25	418.525	1157.32	738.799	1436.5	1277.95	1241.83	1167.38	1204.58	1127.66	966.8	1319.38			999.928	841.377	805.263	730.813	768.013	709.139	548.275	900.85			0.982975	0.827112	0.79161	0.718423	0.754992	0.959854	0.742117	1.21934			0.461349	0.361904	0.604342	0.467943	0.511904	0.504415	0.701083	0.948106			0.636851	0.596828	0.793155
594.681	441.147	1464.23	1023.09	423.839	1157.38	733.537	1447.02	1278.42	1227.08	1173.85	1212.39	1133.75	969.5	1304			1010.45	841.847	790.513	737.283	775.822	709.911	545.661	880.161			0.987647	0.822849	0.772673	0.720645	0.758314	0.967792	0.743877	1.19989			0.466021	0.357641	0.585405	0.470164	0.515226	0.512352	0.702843	0.928649			0.6433	0.589797	0.768301
599.678	442.238	1461.8	1019.56	425.403	1160.62	735.222	1447.87	1277.79	1256.6	1176.44	1220.38	1132.19	956.89	1283.55			1011.3	841.218	820.026	739.866	783.808	706.791	531.487	858.146			0.991894	0.825078	0.804293	0.725671	0.768769	0.96133	0.722893	1.16719			0.470267	0.35987	0.617024	0.47519	0.525681	0.505891	0.68186	0.895956			0.649163	0.593473	0.809799
604.675	439.485	1454.73	1015.25	423.681	1167	743.323	1440.29	1285.27	1253.68	1179.32	1219.63	1133.83	956.54	1190.92			1003.72	848.703	817.109	742.752	783.063	710.15	532.859	767.236			0.988645	0.835956	0.804837	0.731596	0.771302	0.955372	0.716861	1.03217			0.467018	0.370748	0.617568	0.481116	0.528214	0.499933	0.675827	0.760933			0.644678	0.611413	0.810513
609.673	445.416	1449.76	1004.35	425.186	1170.34	745.149	1440	1286.38	1244.16	1182.91	1225.43	1138.42	957.87	1178.29			1003.43	849.809	807.59	746.336	788.863	713.233	532.684	753.099			0.999093	0.846132	0.804096	0.743107	0.78545	0.957168	0.714869	1.01067			0.477466	0.380924	0.616827	0.492627	0.542362	0.501729	0.673836	0.739431			0.6591	0.628195	0.809541
614.67	444.446	1453.78	1009.34	423.514	1169.6	746.086	1450.19	1292.83	1261.05	1187.28	1244.76	1140.08	962.3	1177.47			1013.62	856.263	824.475	750.708	808.194	716.561	538.786	753.958			1.00424	0.848341	0.816847	0.743763	0.800717	0.960427	0.72215	1.01055			0.482618	0.383133	0.629579	0.493282	0.557628	0.504988	0.681117	0.739314			0.666211	0.631837	0.826276
619.667	438.892	1457.15	1018.26	423.639	1165.03	741.388	1447.19	1296.96	1254.83	1198.05	1244.11	1144.38	958.78	1181.59			1010.62	860.392	818.263	761.477	807.538	720.739	535.141	757.951			0.992494	0.844962	0.803589	0.747821	0.793056	0.972148	0.72181	1.02234			0.470867	0.379754	0.61632	0.497341	0.549968	0.516709	0.680776	0.751103			0.649991	0.626265	0.808875
624.665	445.5	1457.54	1012.04	421.439	1168.24	746.797	1456.35	1295.55	1261.77	1199.55	1248.7	1149.15	966.1	1182.29			1019.78	858.983	825.199	762.977	812.13	727.714	544.661	760.853			1.00765	0.848766	0.815384	0.753902	0.80247	0.974447	0.729329	1.01882			0.486023	0.383558	0.628115	0.503422	0.559382	0.519008	0.688296	0.747584			0.670912	0.632539	0.824356
629.662	446.71	1457.06	1010.35	424.367	1173.9	749.537	1445.65	1296.08	1269.24	1210.53	1256.61	1156.6	970.52	1184.77			1009.08	859.506	832.667	773.961	820.044	732.23	546.153	760.404			0.998737	0.850699	0.824135	0.76603	0.811641	0.97691	0.728654	1.0145			0.47711	0.38549	0.636866	0.51555	0.568553	0.521471	0.687621	0.743261			0.658609	0.635725	0.83584
634.659	446.627	1453.37	1006.74	423.208	1176.72	753.516	1442.78	1306.39	1264.31	1223.84	1264.48	1150.17	969.97	1188.46			1006.21	869.824	827.738	787.266	827.908	726.964	546.762	765.25			0.999472	0.863999	0.822195	0.781994	0.822364	0.964763	0.725614	1.01557			0.477846	0.398791	0.634927	0.531514	0.579276	0.509323	0.684581	0.744335			0.659624	0.65766	0.833295
639.657	444.894	1460.84	1015.95	422.839	1175.56	752.716	1441.38	1312.34	1270.62	1229.09	1266.77	1151.26	973.28	1192.29			1004.81	875.771	834.052	792.519	830.199	728.417	550.441	769.453			0.989032	0.862023	0.820959	0.780078	0.817166	0.967718	0.731273	1.02224			0.467406	0.396815	0.63369	0.529598	0.574078	0.512279	0.69024	0.750998			0.645213	0.654401	0.831673
644.654	442.086	1468.35	1026.26	424.603	1171.48	746.879	1450.64	1318.27	1267.61	1234.86	1268.14	1152.69	975.23	1193.03			1014.07	881.695	831.039	798.286	831.572	728.091	550.627	768.425			0.988118	0.859132	0.809772	0.777857	0.810291	0.974845	0.737237	1.02885			0.466492	0.393924	0.622503	0.527377	0.567203	0.519405	0.696204	0.757611			0.643951	0.649633	0.816991
649.651	442.225	1466.86	1024.63	422.006	1172.9	750.894	1455.46	1327.31	1268.79	1242.57	1273.65	1149.37	980.99	1203.26			1018.89	890.741	832.218	806.002	837.077	727.366	558.984	781.258			0.994397	0.869326	0.81221	0.786624	0.816952	0.968667	0.744425	1.04044			0.472771	0.404118	0.624942	0.536144	0.573864	0.513227	0.703391	0.7692			0.652618	0.666445	0.82019
654.649	454.119	1467.24	1013.12	424.078	1173.68	749.598	1449.32	1324.27	1271.06	1252.95	1281.21	1153.75	982.75	1196.88			1012.75	887.695	834.488	816.383	844.636	729.675	558.672	772.797			0.999629	0.876196	0.823678	0.805808	0.833695	0.973422	0.745295	1.03095			0.478003	0.410988	0.63641	0.555328	0.590606	0.517983	0.704262	0.759711			0.659841	0.677774	0.835241
659.646	459.26	1466.12	1006.87	422.3	1173.82	751.515	1454.32	1338.43	1266.38	1258.1	1282.66	1155.31	981.97	1202.08			1017.75	901.862	829.815	821.533	846.088	733.014	559.67	779.776			1.01081	0.895713	0.824157	0.815932	0.840319	0.975382	0.744722	1.03761			0.489182	0.430505	0.636889	0.565452	0.597231	0.519943	0.703689	0.766368			0.675273	0.70996	0.83587
664.643	462.23	1463.47	1001.24	422.358	1178.68	756.32	1460.73	1343.16	1268.59	1259.44	1284.08	1164.44	992.07	1209.32			1024.16	906.589	832.02	822.866	847.508	742.081	569.712	786.961			1.0229	0.905469	0.830992	0.821849	0.846461	0.981173	0.753268	1.04051			0.501271	0.440261	0.643724	0.571369	0.603373	0.525734	0.712235	0.769276			0.691961	0.726049	0.844841
669.641	466.79	1464.19	997.398	424.578	1180.15	755.569	1463.37	1349.78	1273.8	1258.71	1284.29	1161.23	991.25	1233.14			1026.8	913.21	837.231	822.144	847.719	736.655	566.672	808.561			1.02948	0.915592	0.839415	0.824289	0.84993	0.974967	0.749994	1.07014			0.507855	0.450384	0.652146	0.573808	0.606842	0.519528	0.70896	0.798898			0.701049	0.742743	0.855895
674.638	469.91	1467.4	997.494	424.986	1186.22	761.232	1463.81	1346.48	1277.69	1260.35	1286.67	1162.86	987.13	1235.49			1027.24	909.907	841.116	823.78	850.105	737.875	562.144	810.5			1.02982	0.912193	0.843229	0.825849	0.852241	0.969317	0.738466	1.06472			0.508192	0.446985	0.65596	0.575369	0.609152	0.513878	0.697433	0.793484			0.701515	0.737137	0.8609
679.635	472.242	1469.57	997.327	430.55	1192.22	761.668	1474.22	1345.77	1285.77	1264.29	1289.93	1165.44	992.34	1228.33			1037.65	909.203	849.199	827.722	853.361	734.892	561.79	797.776			1.04044	0.91164	0.851475	0.829941	0.855648	0.964846	0.737579	1.04741			0.518809	0.446432	0.664207	0.57946	0.61256	0.509406	0.696545	0.776169			0.71617	0.736226	0.871723
684.633	464.636	1474.69	1010.06	429.608	1193.7	764.094	1484.31	1356.4	1281.07	1269.15	1291.75	1169.13	993.46	1224.01			1047.74	919.831	844.501	832.58	855.177	739.525	563.852	794.399			1.03731	0.910671	0.836091	0.824289	0.846661	0.967846	0.737935	1.03966			0.515684	0.445463	0.648823	0.573809	0.603573	0.512406	0.696902	0.768424			0.711857	0.734628	0.851533
689.63	469.996	1473.41	1003.42	432.331	1191.96	759.631	1485.13	1362.23	1288.15	1280.96	1299.46	1168.11	999.84	1223.88			1048.56	925.665	851.577	844.386	862.891	735.775	567.509	791.551			1.04499	0.922514	0.848678	0.841512	0.859954	0.968595	0.747085	1.04202			0.523367	0.457306	0.661409	0.591031	0.616865	0.513156	0.706052	0.770783			0.722462	0.754158	0.868052
694.627	481.107	1480.04	998.932	431.694	1195.06	763.366	1486.22	1374.91	1294.62	1282.73	1301.28	1170.78	999.97	1222.59			1049.65	938.339	858.045	846.163	864.711	739.084	568.276	790.896			1.05077	0.939342	0.858962	0.847068	0.865636	0.968191	0.744435	1.03606			0.529142	0.474134	0.671694	0.596588	0.622547	0.512752	0.703401	0.764826			0.730434	0.781911	0.88155
699.625	469.158	1474.94	1005.79	437.819	1194.84	757.025	1478.83	1372.74	1291.28	1290.39	1309.22	1168.44	1000.24	1229.96			1042.26	936.172	854.706	853.816	872.647	730.62	562.421	792.146			1.03626	0.930786	0.849789	0.848904	0.867626	0.96512	0.742936	1.04639			0.514634	0.465578	0.66252	0.598424	0.624538	0.509681	0.701903	0.775156			0.710407	0.7678	0.86951
704.622	472.033	1483.29	1011.26	432.958	1194	761.042	1473.09	1380.79	1290.32	1290.87	1313.72	1169.72	1001.79	1227.06			1036.52	944.218	853.751	854.297	877.147	736.759	568.832	794.098			1.02498	0.933703	0.844244	0.844784	0.867379	0.968092	0.747438	1.04344			0.503351	0.468495	0.656975	0.594304	0.624291	0.512653	0.706405	0.772198			0.694832	0.772611	0.862232
709.619	471.494	1485.63	1014.14	438.053	1194.68	756.632	1472.02	1376.83	1285.22	1295.9	1314.86	1172.51	999.39	1238.67			1035.45	940.263	848.648	859.333	878.286	734.453	561.337	800.621			1.02102	0.927156	0.836818	0.847354	0.866043	0.970687	0.741889	1.05814			0.499393	0.461948	0.649549	0.596874	0.622955	0.515248	0.700856	0.7869			0.689369	0.761814	0.852487
714.616	491.295	1487.7	996.407	443.575	1199.68	756.105	1461.21	1376.39	1294.03	1303.42	1322.49	1178.46	1008.03	1240.92			1024.64	939.816	857.462	866.847	885.922	734.889	564.455	797.342			1.02834	0.943205	0.860554	0.869973	0.889117	0.97194	0.74653	1.05454			0.506711	0.477997	0.673286	0.619493	0.646029	0.516501	0.705497	0.783301			0.69947	0.788281	0.883639
719.614	517.182	1485.04	967.853	457.231	1199.84	742.604	1465.48	1376.83	1292.3	1308.03	1320.84	1188.75	1015.62	1241.6			1028.91	940.256	855.731	871.463	884.266	731.522	558.389	784.366			1.06308	0.971486	0.884154	0.900408	0.913636	0.985077	0.751934	1.05624			0.541456	0.506278	0.696885	0.649928	0.670548	0.529638	0.7109	0.785			0.747433	0.83492	0.914611
724.611	488.027	1486.23	998.208	482.578	1218.27	735.693	1467.64	1382.33	1292.6	1314.17	1321.74	1198.34	1015.09	1245.96			1031.07	945.763	856.026	877.599	885.169	715.764	532.512	763.387			1.03292	0.947461	0.857563	0.879175	0.886758	0.972911	0.723824	1.03764			0.511298	0.482253	0.670295	0.628695	0.64367	0.517472	0.68279	0.766406			0.705802	0.7953	0.879713
729.608	469.392	1490.95	1021.56	486.939	1221.38	734.436	1476.67	1397.14	1291.56	1320.9	1328.39	1197.02	1020.27	1247.38			1040.11	960.574	854.994	884.33	891.816	710.078	533.331	760.436			1.01816	0.940304	0.836952	0.865669	0.872997	0.966834	0.726178	1.0354			0.496531	0.475096	0.649684	0.615189	0.629909	0.511395	0.685144	0.764164			0.685417	0.783497	0.852663
734.606	464.742	1493.33	1028.59	488.069	1224.11	736.044	1478.44	1388.77	1291.7	1315.21	1327.82	1189.06	1021.23	1257.6			1041.87	952.195	855.135	878.636	891.249	700.995	533.161	769.535			1.01292	0.925732	0.831369	0.854217	0.866479	0.952382	0.72436	1.0455			0.491291	0.460523	0.6441	0.603737	0.623391	0.496943	0.683327	0.774264			0.678184	0.759465	0.845335
739.603	461.983	1494.28	1032.29	476.853	1224.56	747.711	1478.81	1387.26	1303.78	1309.34	1324.78	1190.83	1022.35	1265.34			1042.24	950.688	867.212	872.772	888.211	713.98	545.497	788.487			1.00964	0.920949	0.840084	0.84547	0.860426	0.954888	0.729556	1.05453			0.488012	0.455741	0.652816	0.59499	0.617338	0.499448	0.688523	0.783297			0.673658	0.751577	0.856773
744.6	468.012	1493.06	1025.04	471.022	1220.55	749.523	1477.9	1396.03	1295.87	1317.43	1331.96	1190.97	1023.14	1267.58			1041.33	959.46	859.302	880.861	895.386	719.953	552.118	796.554			1.01589	0.936019	0.838308	0.85934	0.87351	0.960548	0.736626	1.06275			0.494264	0.470811	0.651039	0.60886	0.630422	0.505109	0.695593	0.79151			0.682289	0.77643	0.854442
749.598	472.323	1496.06	1023.73	474.875	1223.27	748.391	1487.3	1397.17	1305.11	1328.84	1336.52	1192.67	1034.72	1265.43			1050.73	960.597	868.539	892.274	899.947	717.8	559.845	790.556			1.02637	0.938329	0.848405	0.87159	0.879085	0.959124	0.748065	1.05634			0.504748	0.47312	0.661136	0.621109	0.635996	0.503685	0.707032	0.785103			0.69676	0.780239	0.867693
754.595	471.86	1496.14	1024.28	485.672	1224.56	738.888	1479.79	1393.1	1306.06	1340.71	1344.33	1197.47	1057.84	1266.79			1043.22	956.529	869.494	904.136	907.763	711.797	572.168	781.12			1.01849	0.933854	0.848882	0.882703	0.886244	0.963335	0.774364	1.05716			0.496861	0.468646	0.661614	0.632223	0.643156	0.507896	0.73333	0.785919			0.685874	0.77286	0.86832
759.592	470.247	1499.63	1029.38	483.8	1224.72	740.925	1479.56	1396.02	1304.63	1351.67	1346.62	1198.38	1061.81	1265.76			1042.99	959.453	868.058	915.099	910.049	714.581	578.01	781.964			1.01322	0.932069	0.843282	0.888981	0.884075	0.964444	0.780119	1.05539			0.491596	0.466861	0.656014	0.638501	0.640987	0.509005	0.739086	0.784151			0.678605	0.769916	0.860971
764.59	472.22	1499.22	1027	482.486	1229.1	746.612	1475.25	1400.12	1310.83	1355.9	1351.63	1200.47	1065.85	1267.31			1038.68	963.551	874.257	919.33	915.058	717.981	583.364	784.826			1.01137	0.938219	0.851272	0.89516	0.891001	0.961652	0.781348	1.05118			0.489743	0.473011	0.664004	0.64468	0.647913	0.506213	0.740315	0.779946			0.676048	0.780058	0.871457
769.587	466.178	1495.86	1029.69	482.267	1227.2	744.937	1475.06	1393.05	1307.99	1363.03	1352.95	1198.93	1065.02	1279.67			1038.49	956.483	871.424	926.455	916.383	716.664	582.753	797.4			1.00855	0.928908	0.846301	0.899746	0.889964	0.962046	0.782285	1.07043			0.486927	0.4637	0.659033	0.649266	0.646876	0.506607	0.741252	0.799189			0.672161	0.764703	0.864933
774.584	484.159	1493.91	1009.75	482.639	1227.27	744.634	1476.2	1392.97	1310.06	1371.72	1358.29	1200.85	1050.91	1270.08			1039.63	956.4	873.488	935.155	921.716	718.211	568.271	787.437			1.02958	0.947161	0.86505	0.926121	0.912812	0.964515	0.763155	1.05748			0.507956	0.481953	0.677781	0.675641	0.669724	0.509076	0.722122	0.786244			0.701189	0.794804	0.889539
779.582	466.576	1503.82	1037.24	467.417	1225.2	757.779	1474.97	1401.78	1313.88	1375.25	1357.19	1201.84	1052.58	1272.94			1038.4	965.21	877.315	938.683	920.622	734.427	585.163	805.527			1.00111	0.930553	0.845814	0.904978	0.887566	0.969184	0.772208	1.06301			0.479487	0.465345	0.658545	0.654498	0.644478	0.513744	0.731175	0.791773			0.66189	0.767416	0.864293
784.579	465.329	1498.42	1033.09	467.397	1226.9	759.507	1478.39	1392.83	1322.13	1370.29	1359.34	1203.94	1061.23	1279.32			1041.82	956.256	885.558	933.724	922.769	736.545	593.833	811.922			1.00845	0.925623	0.85719	0.903813	0.893209	0.969767	0.781866	1.06901			0.486821	0.460415	0.669921	0.653333	0.65012	0.514328	0.740833	0.797774			0.672014	0.759286	0.879223
789.576	466.458	1497.35	1030.9	468.278	1228.18	759.907	1476.45	1397.83	1326.98	1370.97	1359.7	1209.38	1060.47	1283.24			1039.88	961.263	890.411	934.399	923.133	741.1	592.192	814.958			1.00872	0.932455	0.863726	0.906396	0.895467	0.975251	0.779295	1.07244			0.48709	0.467246	0.676457	0.655916	0.652379	0.519812	0.738262	0.801207			0.672385	0.770552	0.887801
794.574	462.377	1496.35	1033.97	468.508	1227.73	759.223	1474.14	1395.62	1317.81	1376.12	1361.17	1216.73	1059.97	1282.29			1037.57	959.051	881.244	939.547	924.605	748.22	591.462	813.784			1.00348	0.927544	0.852293	0.908681	0.89423	0.985508	0.779036	1.07186			0.481854	0.462336	0.665025	0.658201	0.651141	0.530068	0.738003	0.800627			0.665157	0.762454	0.872796
799.571	457.332	1500.34	1043.01	465.533	1229.73	764.196	1484.37	1395.25	1312.7	1386.19	1370.25	1216.36	1069.03	1285.15			1047.8	958.68	876.129	949.619	933.683	750.831	603.497	819.613			1.00459	0.919148	0.840001	0.910461	0.895182	0.982511	0.789715	1.07252			0.482962	0.45394	0.652733	0.659981	0.652094	0.527072	0.748682	0.801279			0.666687	0.748608	0.856665
804.568	461.254	1494.49	1033.24	465.764	1231.48	765.714	1487.45	1391.85	1321.83	1395.14	1377.86	1218.18	1073.21	1297.8			1050.89	955.279	885.257	958.566	941.291	752.414	607.446	832.035			1.01708	0.92455	0.856781	0.927732	0.911012	0.982631	0.793307	1.08661			0.495455	0.459342	0.669512	0.677252	0.667924	0.527191	0.752273	0.815376			0.683932	0.757517	0.878686
809.565	461.381	1493.23	1031.85	467.033	1230.09	763.06	1482.2	1394.83	1321.53	1399.64	1379.46	1223.01	1074.94	1294.69			1045.63	958.263	884.956	963.074	942.891	755.973	607.907	827.655			1.01335	0.928688	0.857643	0.93335	0.91379	0.990712	0.79667	1.08465			0.491728	0.46348	0.670375	0.68287	0.670702	0.535273	0.755637	0.813415			0.678787	0.76434	0.879818
814.563	458.92	1493.94	1035.02	471.528	1240.09	768.557	1489.84	1397.61	1319.25	1405.3	1378.76	1224	1079.49	1293.92			1053.27	961.036	882.68	968.733	942.194	752.469	607.962	822.389			1.01763	0.928522	0.852817	0.935959	0.910318	0.979067	0.791043	1.07004			0.496004	0.463314	0.665548	0.685478	0.667229	0.523628	0.75001	0.798805			0.68469	0.764067	0.873484
819.56	457.56	1502.3	1044.74	472.975	1252.03	779.058	1491.52	1404.67	1319.63	1411.59	1383.14	1223.79	1080.77	1304.78			1054.95	968.104	883.058	975.019	946.574	750.819	607.795	831.803			1.00977	0.926644	0.84524	0.933263	0.906036	0.963752	0.780167	1.0677			0.488142	0.461436	0.657972	0.682783	0.662948	0.508313	0.739133	0.796466			0.673838	0.760969	0.86354
824.557	456.593	1500.98	1044.39	473.119	1252.39	779.274	1489.38	1404.7	1323.33	1420.1	1384.44	1226.87	1078.2	1304.21			1052.81	968.135	886.763	983.533	947.866	753.75	605.081	831.096			1.00806	0.926986	0.849072	0.941729	0.907578	0.967246	0.776468	1.0665			0.486435	0.461777	0.661804	0.691249	0.66449	0.511807	0.735434	0.795263			0.671481	0.761533	0.868569
829.555	462.492	1508.65	1046.16	480.014	1251.98	771.968	1487.42	1402.02	1330.06	1425.36	1391.29	1225.97	1079.93	1300.82			1050.85	965.445	893.488	988.786	954.716	745.961	599.916	820.805			1.00448	0.922844	0.854062	0.945155	0.912588	0.966311	0.777125	1.06326			0.48285	0.457635	0.666793	0.694674	0.6695	0.510872	0.736092	0.792025			0.666532	0.754702	0.875118
834.552	462.366	1500.74	1038.38	484.411	1251.29	766.874	1487.79	1403.58	1331.74	1429.2	1391.79	1230.5	1080.29	1304.15			1051.22	967.013	895.174	992.633	955.222	746.092	595.879	819.735			1.01237	0.931275	0.862091	0.955949	0.91992	0.9729	0.777023	1.06893			0.490742	0.466067	0.674823	0.705468	0.676832	0.517461	0.73599	0.797693			0.677426	0.768607	0.885656
839.549	460.309	1506.41	1046.1	490.569	1252.16	761.596	1500.47	1409.15	1339.95	1421.24	1386.65	1232.74	1082.87	1308.44			1063.9	972.581	903.385	984.669	950.083	742.175	592.301	817.875			1.01702	0.929722	0.863575	0.941277	0.908215	0.9745	0.77771	1.0739			0.495391	0.464513	0.676306	0.690797	0.665127	0.51906	0.736677	0.802659			0.683844	0.766045	0.887603
844.547	468.505	1496.17	1027.67	489.811	1254.38	764.567	1498.48	1414.11	1341.44	1421.71	1391.87	1231.73	1083.11	1314.24			1061.91	977.536	904.872	985.138	955.299	741.917	593.299	824.425			1.03332	0.951218	0.88051	0.958615	0.929579	0.970375	0.775993	1.07829			0.511695	0.486009	0.693241	0.708135	0.686491	0.514936	0.73496	0.807053			0.706351	0.801494	0.909829
849.544	472.894	1508.29	1035.39	482.475	1255.92	773.45	1502.4	1408.31	1336.85	1431.03	1393.76	1229.71	1086.17	1327.06			1065.83	971.741	900.283	994.458	957.194	747.236	603.695	844.581			1.02939	0.938525	0.86951	0.960466	0.924475	0.966108	0.780522	1.09197			0.507768	0.473317	0.682241	0.709985	0.681387	0.510668	0.739489	0.820728			0.700929	0.780563	0.895392
854.541	475.343	1500.9	1025.56	484.092	1261.09	776.995	1512.27	1414.76	1344.43	1436.35	1396.9	1230.8	1090.33	1332.44			1075.7	978.188	907.859	999.783	960.327	746.705	606.238	848.346			1.04889	0.953809	0.885233	0.974866	0.936394	0.961016	0.780234	1.09183			0.527266	0.488601	0.697965	0.724386	0.693305	0.505577	0.739201	0.820592			0.727844	0.805769	0.916028
859.539	471.98	1515.09	1043.11	488.7	1270.56	781.864	1516.69	1415.9	1339.05	1442.32	1399.19	1237.46	1091.62	1340.54			1080.12	979.331	902.481	1005.75	962.624	748.761	602.92	851.835			1.03548	0.938861	0.865187	0.964187	0.922844	0.957661	0.771132	1.08949			0.513858	0.473653	0.677918	0.713707	0.679756	0.502222	0.730098	0.818255			0.709336	0.781117	0.889718
864.536	514.961	1521	1006.04	488.317	1281.83	793.512	1516.56	1422.34	1344.76	1449.67	1407.02	1244.54	1094.38	1341.22			1079.99	985.771	908.193	1013.1	970.447	756.219	606.063	852.905			1.07351	0.979858	0.902745	1.00702	0.964626	0.953003	0.763773	1.07485			0.551886	0.514649	0.715476	0.756542	0.721537	0.497563	0.72274	0.803611			0.76183	0.848726	0.939011
869.533	484.192	1516.3	1032.11	488.294	1296.08	807.786	1507.77	1422.73	1354.37	1451.58	1404.01	1249.83	1090.92	1338.93			1071.2	986.157	917.802	1015.01	967.441	761.537	602.626	850.637			1.03787	0.955477	0.889248	0.983435	0.937343	0.942746	0.746022	1.05305			0.516247	0.490269	0.70198	0.732955	0.694255	0.487307	0.704989	0.78181			0.712633	0.808518	0.921298
874.531	474.965	1519.25	1044.28	493.631	1317.78	824.153	1511.76	1422.15	1348.79	1450.11	1402.36	1264.06	1100.81	1335.66			1075.19	985.581	912.218	1013.54	965.788	770.427	607.179	842.029			1.0296	0.943788	0.873536	0.970562	0.924834	0.934811	0.736731	1.02169			0.507972	0.47858	0.686267	0.720082	0.681746	0.479371	0.695698	0.750453			0.70121	0.789242	0.900676
879.528	471.56	1525.58	1054.02	492.664	1349.9	857.236	1516.59	1422.55	1354.69	1457.54	1409.57	1276.19	1106.55	1351.58			1080.02	985.975	918.122	1020.97	972.999	783.528	613.886	858.912			1.02467	0.935442	0.871067	0.96864	0.923131	0.914017	0.716123	1.00196			0.503039	0.470234	0.683798	0.71816	0.680043	0.458577	0.675089	0.730718			0.694401	0.775479	0.897436
884.525	471.961	1528.01	1056.05	491.881	1312.42	820.543	1520.01	1419.3	1353.53	1457.55	1408.31	1295.2	1098.96	1349.17			1083.44	982.725	916.962	1020.98	971.741	803.322	607.079	857.293			1.02593	0.930566	0.868293	0.966787	0.920165	0.979013	0.73985	1.04479			0.504307	0.465357	0.681025	0.716307	0.677076	0.523573	0.698817	0.77355			0.696151	0.767437	0.893795
889.523	471.95	1523.17	1051.22	496.242	1302.44	806.2	1507.11	1422.84	1352.45	1451.22	1411.18	1299.71	1102.44	1364.26			1070.54	986.271	915.879	1014.65	974.611	803.472	606.198	868.022			1.01838	0.938213	0.871251	0.965211	0.927121	0.996616	0.75192	1.07668			0.49675	0.473005	0.683983	0.714731	0.684033	0.541177	0.710887	0.805446			0.685719	0.780049	0.897678
894.52	475.536	1524	1048.46	496.567	1289.15	792.586	1511.52	1423.61	1356.47	1455.9	1411.11	1282.72	1100.95	1376.51			1074.95	987.044	919.898	1019.33	974.541	786.155	604.383	879.947			1.02526	0.941419	0.877377	0.972216	0.929494	0.991886	0.762546	1.11022			0.503637	0.476211	0.690108	0.721735	0.686406	0.536447	0.721512	0.838985			0.695227	0.785336	0.905717
899.517	481.048	1516.43	1035.38	498.342	1277.53	779.189	1508.51	1427.04	1362.14	1453.83	1411.79	1266.7	1104.31	1365.22			1071.94	990.468	925.571	1017.26	975.222	768.361	605.968	866.88			1.03531	0.95662	0.893941	0.982492	0.941895	0.986103	0.777691	1.11254			0.513686	0.491412	0.706673	0.732012	0.698807	0.530664	0.736657	0.841304			0.709098	0.810404	0.927456
904.515	466.803	1516.46	1049.66	496.583	1275.27	778.683	1513.62	1423.83	1363.99	1458.34	1417.42	1263.66	1103.92	1358.74			1077.05	987.256	927.417	1021.77	980.849	767.078	607.337	862.16			1.02609	0.940552	0.883544	0.973432	0.934448	0.985097	0.779954	1.1072			0.504468	0.475344	0.696275	0.722952	0.69136	0.529657	0.738921	0.835965			0.696373	0.783905	0.91381
909.512	469.834	1514.92	1045.09	497.294	1275.67	778.377	1512.43	1430.4	1372.26	1462.31	1416.45	1272.82	1097.55	1358.89			1075.86	993.831	935.686	1025.74	979.877	775.523	600.256	861.595			1.02944	0.950954	0.895318	0.981488	0.937602	0.996333	0.771164	1.10691			0.507815	0.485746	0.708049	0.731008	0.694514	0.540894	0.73013	0.835675			0.700994	0.801061	0.929264
914.509	468.259	1523.05	1054.79	503.678	1277.34	773.657	1521.33	1433.24	1360.05	1465.41	1421.38	1276.43	1098.63	1369.52			1084.76	996.672	923.481	1028.84	984.805	772.75	594.952	865.843			1.02842	0.944903	0.875513	0.975398	0.933652	0.998828	0.769013	1.11916			0.506792	0.479695	0.688245	0.724918	0.690564	0.543388	0.727979	0.847919			0.699581	0.791081	0.903272
919.506	472.647	1525.67	1053.02	514.558	1277.33	762.773	1515.99	1430.8	1356.17	1462.43	1417.99	1283.16	1096.97	1369.7			1079.42	994.233	919.597	1025.86	981.416	768.598	582.412	855.143			1.02507	0.944169	0.873292	0.974205	0.931998	1.00764	0.763546	1.1211			0.503442	0.478961	0.686023	0.723725	0.68891	0.552197	0.722512	0.84986			0.694958	0.789871	0.900356
924.504	474.963	1527.33	1052.36	528.017	1277.27	749.256	1508.85	1429.23	1364.2	1461.68	1415.94	1282.68	1097.35	1372.35			1072.28	992.665	927.635	1025.11	979.374	754.661	569.333	844.33			1.01892	0.943274	0.881479	0.974105	0.930644	1.00721	0.759864	1.12689			0.497298	0.478066	0.694211	0.723625	0.687556	0.551775	0.718831	0.855654			0.686476	0.788394	0.911101
929.501	480.535	1531.72	1051.18	563.761	1279.32	715.555	1509.49	1434.84	1363.6	1464.11	1418.37	1281.92	1099.19	1375.28			1072.92	998.271	927.033	1027.54	981.797	718.156	535.429	811.517			1.02068	0.949664	0.881895	0.977509	0.933992	1.00363	0.748271	1.13411			0.499052	0.484456	0.694626	0.727029	0.690904	0.548196	0.707238	0.862871			0.688897	0.798933	0.911647
934.498	478.435	1538.07	1059.63	612.017	1282.22	670.199	1513.19	1428.29	1364.53	1464.78	1416.85	1282.21	1103.53	1379.45			1076.62	991.718	927.956	1028.21	980.277	670.191	491.513	767.434			1.01603	0.935908	0.875734	0.970349	0.925111	0.999988	0.733384	1.14508			0.494404	0.4707	0.688466	0.719869	0.682023	0.544549	0.69235	0.873846			0.682481	0.776247	0.903561
939.496	478.451	1564.05	1085.6	533.519	1289.44	755.923	1518.45	1432.42	1359.19	1463.84	1422.07	1270.5	1104.72	1378.59			1081.88	995.847	922.622	1027.27	985.502	736.978	571.201	845.071			0.996578	0.917328	0.849876	0.946272	0.907798	0.974938	0.755634	1.11793			0.474952	0.452119	0.662608	0.695792	0.66471	0.519499	0.714601	0.846695			0.655629	0.745605	0.869624
944.493	488.132	1563.55	1075.41	522.892	1293.58	770.69	1513.44	1434.66	1372.81	1458.95	1418.49	1270.06	1112.32	1375.83			1076.87	998.089	936.244	1022.38	981.922	747.166	589.428	852.934			1.00135	0.928098	0.87059	0.950689	0.913065	0.969477	0.764806	1.10671			0.479728	0.46289	0.683322	0.700209	0.669977	0.514037	0.723772	0.835477			0.662222	0.763368	0.89681
949.49	490.889	1568.14	1077.25	524.153	1294.85	770.7	1517.3	1433.02	1367.62	1456.99	1418.59	1269.69	1110.14	1377.11			1080.73	996.445	931.045	1020.42	982.022	745.539	585.987	852.958			1.00323	0.924988	0.864278	0.947247	0.911599	0.967353	0.760331	1.10673			0.4816	0.45978	0.677009	0.696767	0.668511	0.511914	0.719298	0.835494			0.664807	0.758238	0.888526
954.488	482.513	1579.16	1096.65	530.942	1300.53	769.584	1516.63	1440.7	1370.1	1452.76	1416.7	1268.95	1115.66	1374.76			1080.06	1004.14	933.526	1016.19	980.13	738.005	584.718	843.815			0.984871	0.91564	0.851254	0.926634	0.893751	0.958966	0.759785	1.09646			0.463245	0.450432	0.663985	0.676153	0.650662	0.503527	0.718751	0.825218			0.639468	0.742822	0.871432
959.485	480.063	1579.84	1099.78	530.125	1308.94	778.815	1510.65	1447.08	1362.26	1454.26	1415.46	1275.35	1114.57	1380.76			1074.08	1010.51	925.686	1017.69	978.886	745.222	584.445	850.632			0.976632	0.918835	0.841704	0.925359	0.890077	0.956867	0.750429	1.09221			0.455006	0.453627	0.654435	0.674879	0.646989	0.501427	0.709395	0.820976			0.628096	0.748092	0.858899
964.482	471.665	1611.09	1139.43	527.736	1305.61	777.877	1506.35	1439.21	1360.58	1458.04	1420.02	1277.33	1118.24	1384.59			1069.78	1002.64	924.007	1021.47	983.447	749.595	590.504	856.854			0.938876	0.879951	0.810939	0.896472	0.863105	0.963642	0.759123	1.10153			0.41725	0.414743	0.62367	0.645992	0.620017	0.508203	0.718089	0.830291			0.575977	0.683967	0.818522
969.48	469.779	1617.94	1148.16	522.567	1319.71	797.142	1517.37	1440.92	1359.95	1453.72	1416	1278.27	1125.25	1389.9			1080.8	1004.35	923.379	1017.15	979.43	755.702	602.683	867.329			0.941337	0.874753	0.804227	0.885896	0.853045	0.948014	0.756055	1.08805			0.41971	0.409544	0.616958	0.635416	0.609956	0.492575	0.715022	0.816811			0.579373	0.675393	0.809713
974.477	469.975	1615.59	1145.61	519.767	1316.33	796.566	1512.86	1434.84	1361.63	1449.04	1411.46	1276.59	1129.96	1396.17			1076.29	998.271	925.058	1012.47	974.886	756.819	610.193	876.407			0.939491	0.871386	0.807479	0.88378	0.850974	0.950102	0.766029	1.10023			0.417865	0.406178	0.62021	0.633299	0.607885	0.494663	0.724996	0.828994			0.576826	0.669842	0.813981
979.474	467.667	1612.98	1145.32	521.869	1302.89	781.02	1511.69	1434.79	1371.96	1439.45	1407.63	1280.89	1134.1	1406.69			1075.12	998.218	935.392	1002.88	971.058	759.025	612.231	884.819			0.938706	0.871565	0.81671	0.875633	0.847851	0.971838	0.783886	1.1329			0.417079	0.406356	0.629441	0.625152	0.604762	0.516399	0.742853	0.861664			0.575742	0.670136	0.826096
984.472	480.128	1602.34	1122.21	521.092	1296.99	775.901	1513.84	1441.96	1370.38	1427.75	1397.82	1281.26	1136.19	1394.79			1077.27	1005.39	933.808	991.177	961.252	760.166	615.098	873.693			0.959958	0.895905	0.832116	0.883238	0.856571	0.97972	0.792753	1.12604			0.438331	0.430696	0.644847	0.632757	0.613483	0.524281	0.75172	0.854799			0.605078	0.710276	0.846316
989.469	481.626	1607.94	1126.32	522.322	1296.83	774.511	1523.82	1433.16	1374.12	1419.27	1395.48	1286.49	1139.12	1399.67			1087.25	996.589	937.552	982.697	958.908	764.167	616.798	877.345			0.965313	0.884823	0.832407	0.872489	0.851368	0.986644	0.796371	1.13277			0.443686	0.419615	0.645138	0.622009	0.608279	0.531205	0.755338	0.861535			0.61247	0.692001	0.846697
994.466	482.999	1608.04	1125.04	515.578	1300.53	784.949	1521.73	1439.47	1377.08	1423.13	1394.86	1286.21	1138.45	1401.62			1085.16	1002.9	940.507	986.558	958.294	770.63	622.872	886.047			0.964552	0.891432	0.835974	0.876906	0.851784	0.981758	0.793519	1.1288			0.442925	0.426224	0.648705	0.626426	0.608695	0.526319	0.752486	0.857558			0.611419	0.7029	0.851378
999.464	484.175	1607.09	1122.91	517.333	1301.6	784.265	1523.54	1444.59	1377.81	1416.19	1398.37	1286.5	1137.16	1396.46			1086.97	1008.02	941.238	979.622	961.799	769.167	619.827	879.125			0.967991	0.897686	0.838213	0.872395	0.856523	0.980749	0.790329	1.12095			0.446364	0.432478	0.650944	0.621915	0.613435	0.52531	0.749295	0.849717			0.616167	0.713214	0.854317
1004.46	483.05	1604.85	1121.8	528.583	1286.82	758.233	1524.35	1443.18	1382.38	1406.47	1390.84	1289.66	1142.34	1417.04			1087.78	1006.61	945.808	969.902	954.272	761.075	613.757	888.452			0.969679	0.897321	0.843119	0.864597	0.850664	1.00375	0.809457	1.17174			0.448053	0.432113	0.65585	0.614117	0.607576	0.548309	0.768424	0.900503			0.618497	0.712612	0.860756
1009.46	485.109	1606.42	1121.32	521.839	1286.67	764.83	1531.53	1447.17	1374.7	1408	1394.34	1294.26	1144.59	1423.99			1094.96	1010.6	938.129	971.43	957.766	772.419	622.751	902.147			0.976499	0.90126	0.836633	0.866331	0.854145	1.00992	0.814235	1.17954			0.454872	0.436052	0.649364	0.615851	0.611057	0.554483	0.773201	0.908302			0.627911	0.719108	0.852243
1014.46	490.78	1606.4	1115.62	525.217	1289.77	764.556	1528.21	1448.27	1375.37	1416.82	1400.89	1297.55	1152.45	1414.12			1091.64	1011.7	938.795	980.252	964.322	772.33	627.233	888.908			0.978507	0.906856	0.841504	0.878665	0.864386	1.01017	0.820389	1.16265			0.456881	0.441648	0.654235	0.628185	0.621297	0.554729	0.779355	0.891409			0.630684	0.728337	0.858637
1019.45	497.226	1603.13	1105.91	526.214	1291.21	764.995	1525.98	1453.63	1378.83	1422.99	1409.78	1298.88	1147.07	1418.08			1089.41	1017.06	942.257	986.424	973.211	772.669	620.856	891.862			0.985087	0.919661	0.852022	0.891959	0.880012	1.01003	0.811582	1.16584			0.46346	0.454452	0.664753	0.641479	0.636923	0.554592	0.770549	0.894603			0.639766	0.749453	0.872441
1024.45	516.75	1605.74	1088.99	532.536	1289.73	757.197	1525.65	1458	1379.81	1418	1405.04	1298.83	1166.52	1423.24			1089.08	1021.43	943.244	981.427	968.469	766.292	633.984	890.707			1.00008	0.937957	0.86616	0.901223	0.889324	1.01201	0.837277	1.17632			0.478449	0.472749	0.678892	0.650743	0.646236	0.556572	0.796244	0.905084			0.660457	0.779626	0.890996
1029.45	510.345	1600.76	1090.42	534.608	1291.18	756.57	1523.83	1460.99	1376.15	1415.97	1405.76	1300.47	1185.88	1424.07			1087.26	1024.42	939.577	979.399	969.188	765.861	651.272	889.461			0.997103	0.939479	0.861669	0.898189	0.888824	1.01228	0.860822	1.17565			0.475477	0.47427	0.6744	0.647709	0.645736	0.556841	0.819789	0.904412			0.656354	0.782135	0.885101
1034.44	525.486	1599.45	1073.96	537.058	1289.98	752.926	1523.01	1462.86	1375.74	1436.01	1413.48	1301.99	1179.96	1420.39			1086.44	1026.29	939.174	999.438	976.908	764.936	642.902	883.331			1.01162	0.955616	0.874496	0.93061	0.909631	1.01595	0.853871	1.1732			0.489995	0.490408	0.687227	0.680129	0.666543	0.560512	0.812838	0.90196			0.676396	0.808748	0.901936
1039.44	519.438	1603.13	1083.7	539.317	1291.85	752.528	1531.18	1456.89	1376.99	1447.42	1428.05	1298.41	1192.43	1420.46			1094.61	1020.32	940.417	1010.86	991.48	759.094	653.113	881.148			1.01007	0.941523	0.867788	0.932786	0.914907	1.00873	0.867892	1.17092			0.488446	0.476315	0.680519	0.682305	0.671819	0.553286	0.826859	0.89968			0.674256	0.785507	0.893132
1044.44	510.15	1607	1096.85	542.603	1294.59	751.99	1532.12	1446.24	1387.67	1453.2	1428.11	1300.34	1181.1	1419.9			1095.55	1009.67	951.097	1016.63	991.544	757.741	638.497	877.3			0.998809	0.920516	0.867114	0.92686	0.903989	1.00765	0.849076	1.16664			0.477183	0.455308	0.679845	0.67638	0.660901	0.552208	0.808043	0.8954			0.658709	0.750864	0.892247
1049.44	511.681	1605.36	1093.68	550.669	1295.49	744.822	1536.83	1449.59	1383.65	1460.49	1433.81	1298.67	1176.05	1424.77			1100.26	1013.02	947.077	1023.92	997.238	748.006	625.381	874.102			1.00602	0.926253	0.865958	0.936215	0.911822	1.00427	0.839638	1.17357			0.484395	0.461045	0.678689	0.685735	0.668734	0.548836	0.798605	0.902334			0.668664	0.760325	0.89073
1054.43	499.838	1604.45	1104.61	564.767	1296.27	731.5	1536.79	1453.3	1382.52	1472.81	1438.29	1298.47	1180.59	1421.4			1100.22	1016.73	945.949	1036.24	1001.72	733.7	615.823	856.629			0.996021	0.920436	0.856362	0.938106	0.906851	1.00301	0.841863	1.17106			0.474395	0.455227	0.669094	0.687626	0.663762	0.547568	0.80083	0.899821			0.654861	0.750731	0.878137
1059.43	497.738	1609.42	1111.68	561.928	1297.21	735.283	1538.83	1452.64	1384.87	1483.53	1445.17	1303.39	1184.8	1426.99			1102.26	1016.07	948.302	1046.96	1008.6	741.466	622.872	865.058			0.991529	0.913993	0.853037	0.941782	0.907275	1.00841	0.847119	1.1765			0.469903	0.448785	0.665768	0.691302	0.664187	0.55297	0.806085	0.905259			0.64866	0.740107	0.873773
1064.43	497.922	1607.5	1109.58	562.344	1300.28	737.931	1539.58	1450.62	1385.08	1489.01	1445.08	1307.19	1186.3	1436.66			1103.01	1014.05	948.507	1052.44	1008.51	744.85	623.956	874.316			0.994079	0.913908	0.854837	0.948507	0.908913	1.00938	0.845548	1.18482			0.472452	0.4487	0.667569	0.698027	0.665825	0.553937	0.804515	0.913583			0.652179	0.739967	0.876135
1069.43	496.061	1604.96	1108.9	562.556	1300.94	738.388	1540.85	1455.32	1390.3	1494.88	1451.64	1306.47	1181.44	1435.91			1104.28	1018.75	953.731	1058.31	1015.07	743.916	618.884	873.354			0.995835	0.918705	0.860073	0.954385	0.915387	1.00749	0.838156	1.18278			0.474209	0.453497	0.672804	0.703905	0.672299	0.552047	0.797122	0.911547			0.654603	0.747877	0.883007
1074.42	495.223	1606.96	1111.74	560.356	1302.19	741.835	1536.48	1457.8	1390.74	1500.08	1452.87	1312.64	1181.72	1435.86			1099.91	1021.23	954.167	1063.51	1016.3	752.288	621.364	875.505			0.989359	0.918585	0.858266	0.956622	0.914154	1.01409	0.837604	1.18019			0.467733	0.453376	0.670998	0.706142	0.671065	0.558652	0.796571	0.908951			0.645664	0.747678	0.880636
1079.42	495.992	1605.23	1109.24	558.528	1302.23	743.701	1544.12	1459.49	1393.28	1503.66	1458.52	1310.91	1187.95	1428.35			1107.55	1022.92	956.706	1067.09	1021.95	752.38	629.422	869.819			0.998472	0.92218	0.862486	0.961999	0.921303	1.01167	0.846337	1.16958			0.476846	0.456972	0.675217	0.711519	0.678215	0.556231	0.805304	0.898344			0.658243	0.753608	0.886173
1084.42	490.686	1608.6	1117.91	564.147	1303.78	739.629	1544.48	1456.83	1394.53	1520.89	1466.81	1310.81	1195.66	1433.74			1107.91	1020.26	957.956	1084.32	1030.24	746.664	631.513	869.589			0.991053	0.912643	0.856914	0.969952	0.92157	1.00951	0.853824	1.17571			0.469427	0.447435	0.669646	0.719471	0.678482	0.554072	0.812791	0.904472			0.648003	0.73788	0.878861
1089.41	492.263	1604.59	1112.33	566.344	1304.64	738.298	1545.8	1462.8	1393.25	1538.09	1475.69	1309.56	1193.23	1435.74			1109.23	1026.23	956.68	1101.52	1039.12	743.217	626.886	869.399			0.997217	0.922591	0.860069	0.990284	0.934187	1.00666	0.849096	1.17757			0.475591	0.457383	0.672801	0.739804	0.691099	0.551223	0.808063	0.906334			0.656512	0.754286	0.883002
1094.41	494.656	1603.35	1108.69	561.767	1297.39	735.624	1546.74	1461.35	1401.37	1535.73	1475.79	1307.17	1192.98	1441.23			1110.17	1024.78	964.802	1099.16	1039.22	745.408	631.213	879.462			1.00133	0.924313	0.870216	0.9914	0.937342	1.0133	0.858065	1.19553			0.479707	0.459105	0.682947	0.74092	0.694253	0.557861	0.817031	0.924294			0.662193	0.757125	0.896319
1099.41	489.256	1606.47	1117.22	562.131	1298.51	736.374	1547.03	1465.43	1402.95	1547.02	1478.42	1309.38	1190.76	1444.18			1110.46	1028.86	966.379	1110.45	1041.85	747.247	628.629	882.05			0.993952	0.920915	0.864987	0.99394	0.932539	1.01477	0.853682	1.19783			0.472326	0.455706	0.677719	0.74346	0.689451	0.559326	0.812648	0.926591			0.652004	0.751521	0.889457
1104.41	489.711	1610.89	1121.18	558.764	1304.82	746.058	1548.07	1464.76	1406.78	1549.29	1480.66	1314.37	1188.87	1452.47			1111.5	1028.19	970.206	1112.72	1044.09	755.608	630.106	893.708			0.991365	0.91706	0.865345	0.992459	0.931244	1.0128	0.84458	1.19791			0.469738	0.451852	0.678076	0.741979	0.688156	0.557361	0.803547	0.926669			0.648432	0.745164	0.889925
1109.4	479.656	1605.52	1125.87	561.825	1304.46	742.639	1545.77	1461.48	1410.6	1550.21	1479.87	1317.41	1189.02	1466.62			1109.2	1024.91	974.033	1113.64	1043.3	755.583	627.195	904.8			0.9852	0.910328	0.865141	0.989142	0.926667	1.01743	0.844549	1.21836			0.463574	0.44512	0.677873	0.738662	0.683578	0.561991	0.803516	0.94712			0.639923	0.734062	0.889659
1114.4	473.54	1615.55	1142.01	565.05	1305.2	740.152	1549.76	1468.55	1409.8	1546.39	1480.96	1315.14	1198.9	1454.33			1113.19	1031.98	973.231	1109.82	1044.39	750.092	633.85	889.276			0.974758	0.903652	0.852206	0.971812	0.914513	1.01343	0.856378	1.20148			0.453132	0.438444	0.664938	0.721332	0.671425	0.55799	0.815345	0.93024			0.625509	0.723053	0.872683
1119.4	482.788	1610.37	1127.59	565.158	1307.62	742.462	1556.35	1482.25	1413.71	1541.84	1479.91	1317.12	1198.03	1457.17			1119.78	1045.68	977.142	1105.27	1043.34	751.961	632.872	892.016			0.993074	0.927363	0.86658	0.980209	0.925291	1.01279	0.852396	1.20143			0.471447	0.462154	0.679311	0.729729	0.682203	0.557355	0.811363	0.930192			0.650792	0.762154	0.891546
1124.4	480.467	1607.88	1127.41	563.436	1304.77	741.333	1556.55	1548.44	1420.07	1550.53	1484.62	1317.99	1202.59	1459.36			1119.98	1111.87	983.501	1113.96	1048.06	754.55	639.154	895.925			0.993408	0.986214	0.872353	0.988072	0.929612	1.01783	0.862169	1.20853			0.471781	0.521006	0.685085	0.737591	0.686524	0.562389	0.821135	0.937295			0.651253	0.859209	0.899124
1129.39	486.532	1604.52	1117.99	570.414	1307.88	737.471	1549.99	1576.46	1412.78	1549.76	1484.8	1322.38	1200.4	1472.58			1113.42	1139.89	976.206	1113.19	1048.23	751.964	629.986	902.169			0.995914	1.01959	0.873183	0.995708	0.937603	1.01965	0.854252	1.22333			0.474288	0.554386	0.685914	0.745228	0.694515	0.564213	0.813219	0.952091			0.654713	0.914257	0.900213
1134.39	492.358	1605.15	1112.8	573.331	1304.98	731.645	1549.94	1588.23	1414.59	1548.69	1483.56	1319.96	1196.66	1474.24			1113.37	1151.67	978.02	1112.12	1046.99	746.63	623.329	900.912			1.00052	1.03493	0.878886	0.999397	0.940869	1.02048	0.851956	1.23135			0.478891	0.569722	0.691618	0.748917	0.697781	0.565042	0.810922	0.960114			0.661067	0.939548	0.907698
1139.39	492.31	1604.22	1111.91	569.425	1308.61	739.182	1548.89	1585.92	1413.13	1536.48	1481.16	1323.96	1202.82	1514.47			1112.32	1149.35	976.558	1099.91	1044.59	754.536	633.395	945.047			1.00038	1.03367	0.878274	0.989209	0.939455	1.02077	0.856886	1.2785			0.478749	0.568464	0.691005	0.738729	0.696367	0.565332	0.815853	1.00727			0.660871	0.937474	0.906894
1144.39	495.167	1603.3	1108.13	571.458	1307.56	736.106	1558.25	1593.45	1417.29	1516.91	1473.53	1325.64	1195.01	1490.55			1121.68	1156.88	980.718	1080.34	1036.96	754.178	623.552	919.091			1.01223	1.04399	0.88502	0.974922	0.935777	1.02455	0.847095	1.24859			0.490602	0.578782	0.697752	0.724442	0.692689	0.569112	0.806062	0.977348			0.677233	0.954488	0.915748
1149.38	489.78	1599.86	1110.07	567.333	1309.79	742.454	1556.39	1586.5	1416.94	1502.66	1462.78	1326.04	1198.71	1477.3			1119.82	1149.93	980.366	1066.09	1026.21	758.703	631.377	909.966			1.00878	1.0359	0.883153	0.960381	0.924454	1.02189	0.850392	1.22562			0.487154	0.570695	0.695885	0.7099	0.681366	0.566446	0.809359	0.954382			0.672474	0.941153	0.913298
1154.38	489.041	1606.35	1117.31	569.369	1308.66	739.296	1554.68	1590.67	1418.14	1496.66	1459.69	1324.95	1201.48	1483.92			1118.11	1154.1	981.571	1060.09	1023.12	755.578	632.111	914.555			1.00072	1.03293	0.878514	0.948786	0.915703	1.02202	0.855017	1.23706			0.479089	0.567724	0.691245	0.698305	0.672614	0.566584	0.813984	0.965825			0.661341	0.936253	0.90721
1159.38	487.897	1608.35	1120.46	568.653	1308.01	739.358	1557.73	1593.67	1420.58	1512.05	1463.92	1323.4	1203.79	1475.33			1121.16	1157.1	984.013	1075.48	1027.36	754.744	635.137	906.673			1.00063	1.03271	0.878225	0.959856	0.916908	1.02081	0.859039	1.2263			0.479004	0.5675	0.690957	0.709376	0.673819	0.565371	0.818005	0.95506			0.661223	0.935883	0.906831
1164.38	489.769	1600.8	1111.04	568.369	1308.3	739.929	1569.32	1596.05	1424.08	1513.48	1465.67	1325.29	1208.58	1478.34			1132.75	1159.48	987.513	1076.91	1029.1	756.92	640.211	909.971			1.01955	1.0436	0.888822	0.969286	0.926251	1.02296	0.865233	1.22981			0.49792	0.578391	0.701554	0.718806	0.683162	0.567524	0.8242	0.958571			0.687335	0.953844	0.920739
1169.37	487.192	1599.49	1112.3	569.781	1314.29	744.508	1572.54	1596.1	1425.19	1504.34	1460.5	1332.46	1206.88	1491.65			1135.97	1159.53	988.622	1067.77	1023.93	762.68	637.099	921.865			1.02128	1.04246	0.88881	0.959971	0.920556	1.02441	0.855732	1.23822			0.499657	0.577254	0.701542	0.709491	0.677468	0.568969	0.814698	0.966983			0.689732	0.95197	0.920723
1174.37	488.792	1605.48	1116.69	571.147	1316.62	745.475	1580.22	1597.22	1429.04	1489.74	1448.3	1331.66	1223.97	1482.56			1143.65	1160.65	992.468	1053.17	1011.73	760.509	652.823	911.409			1.02415	1.03937	0.888762	0.943123	0.906012	1.02017	0.875714	1.22259			0.50252	0.574162	0.701494	0.692643	0.662923	0.564728	0.834681	0.951351			0.693685	0.94687	0.92066
1179.37	491.922	1602.86	1110.93	571.383	1304.92	733.542	1579.72	1595.58	1431.27	1493.93	1448.87	1328.27	1208.93	1489.45			1143.16	1159.01	994.699	1057.36	1012.3	756.884	637.547	918.068			1.029	1.04328	0.895372	0.951777	0.911218	1.03182	0.869135	1.25155			0.507378	0.578071	0.708104	0.701297	0.668129	0.576382	0.828102	0.980317			0.700391	0.953316	0.929335
1184.36	491.573	1598.49	1106.92	573.683	1358.74	785.053	1581.56	1591.48	1432.26	1493.22	1455.9	1328.95	1211.4	1475.11			1144.99	1154.92	995.686	1056.65	1019.33	755.264	637.717	901.428			1.0344	1.04336	0.899513	0.95459	0.920876	0.962055	0.812323	1.14824			0.51277	0.578153	0.712244	0.70411	0.677787	0.506616	0.77129	0.877001			0.707834	0.953452	0.934769
1189.36	489.956	1603.75	1113.8	575.219	1372.1	796.883	1577.78	1597.75	1431.95	1492.87	1453.88	1331.79	1218.71	1475.88			1141.21	1161.18	995.379	1056.3	1017.31	756.575	643.491	900.663			1.02462	1.04254	0.893681	0.948376	0.913372	0.949418	0.80751	1.13023			0.502989	0.577333	0.706412	0.697896	0.670284	0.493979	0.766477	0.858995			0.694332	0.9521	0.927115
1194.36	493.278	1600.03	1106.75	577.75	1377.4	799.654	1578.71	1597.48	1431.1	1489.25	1450.96	1333.44	1214.58	1478.26			1142.14	1160.91	994.526	1052.68	1014.39	755.686	636.83	900.514			1.03198	1.04893	0.898602	0.951149	0.916553	0.945016	0.796382	1.12613			0.510355	0.583727	0.711333	0.700669	0.673465	0.489577	0.755349	0.854892			0.7045	0.962643	0.933573
1199.36	491.808	1600.47	1108.66	576.678	1378.94	802.258	1576.01	1600.23	1431.03	1487.61	1448.68	1334.61	1218.74	1491.35			1139.44	1163.66	994.456	1051.04	1012.11	757.933	642.062	914.676			1.02776	1.0496	0.896987	0.948026	0.912913	0.94475	0.800319	1.14013			0.506132	0.584396	0.709718	0.697546	0.669825	0.48931	0.759285	0.868889			0.698671	0.963747	0.931454
1204.35	489.859	1607.63	1117.77	580.95	1376.57	795.619	1580.06	1600.55	1430.84	1490.69	1448.53	1333.05	1215.81	1484.52			1143.49	1163.98	994.27	1054.12	1011.96	752.1	634.86	903.571			1.02301	1.04135	0.889514	0.943057	0.905341	0.945302	0.797945	1.13568			0.501385	0.576138	0.702245	0.692577	0.662253	0.489862	0.756911	0.864446			0.692118	0.950128	0.921646
	436.57	1506.87
	436.57	1506.87																									0.521626	0.465208	0.187269	0.25048	0.243088	0.455439	0.0410333	0.271238			0.724421	0.606379	0.761947	1.30323	1.12841	0.834089	1.0846	1.40472
[truncated: 7 more columns]

## Sheet: t18hr
				FRAP										FRAP-background										FRAP/(unbleached-backgorund)										x-min										x/max
time	background	unbleached	unbleached-background	1	2	3	4	5	6	7	8	9	10	1	2	3	4	5	6	7	8	9	10	1	2	3	4	5	6	7	8	9	10	1	2	3	4	5	6	7	8	9	10	1	2	3	4	5	6
0	498.323	2288.77	1790.45	2197.93	2369.47	2062.09	2062.09	1723.34	1934.2	1845.61	1893.89			1741.45	1912.99	1605.61	1605.61	1266.86	1477.73	1389.14	1437.42			0.972638	1.06845	0.896767	0.896767	0.707569	0.825342	0.77586	0.802827			0.535128	0.533977	0.3784	0.3784	0.383089	0.405469	0.402655	0.394804			1	1	1	1	1	1
5.002	468.355	2272.61	1804.25	1249	1422.18	1391.74	1391.74	1041.92	1215.77	1134.37	1197.52			792.529	965.705	935.265	935.265	585.445	759.296	677.896	741.051			0.439256	0.535238	0.518367	0.518367	0.324481	0.420837	0.375721	0.410725			0.00174668	0.000769399	0	0	0	0.000963357	0.00251564	0.00270072			0.00326403	0.00144088	0	0	0	0.00237591
10.003	467.26	2266.91	1799.65	1243.84	1420.24	1392.42	1392.42	1042.55	1213.06	1132.25	1191.88			787.363	963.768	935.95	935.95	586.08	756.584	675.773	735.409			0.437509	0.535531	0.520074	0.520074	0.325664	0.420407	0.375503	0.40864			0	0.00106254	0.00170693	0.00170693	0.00118307	0.000533154	0.00229729	0.000616543			0	0.00198987	0.00451091	0.00451091	0.00308823	0.00131491
15.005	466.344	2262.35	1796.01	1243.53	1418.57	1390.35	1390.35	1044.27	1212.86	1129.73	1190.87			787.053	962.101	933.873	933.873	587.793	756.382	673.253	734.393			0.438223	0.535688	0.519971	0.519971	0.327277	0.421146	0.37486	0.408902			0.000713639	0.00121918	0.00160397	0.00160397	0.00279653	0.00127228	0.00165482	0.00087861			0.00133358	0.0022832	0.00423881	0.00423881	0.00729996	0.00313781
20.006	467.06	2266.87	1799.81	1248.1	1419.92	1392.3	1392.3	1049.68	1212.17	1130.99	1195.73			791.623	963.451	935.826	935.826	593.212	755.694	674.513	739.255			0.439836	0.535306	0.519957	0.519957	0.329596	0.419873	0.374768	0.41074			0.00232668	0.00083717	0.00159021	0.00159021	0.00511575	0	0.00156269	0.00271586			0.00434789	0.0015678	0.00420246	0.00420246	0.013354	0
25.008	467.562	2263.97	1796.41	1245.58	1420.15	1390.38	1390.38	1048.3	1215.07	1128.73	1195			789.108	963.676	933.905	933.905	591.824	758.593	672.257	738.529			0.43927	0.536446	0.519873	0.519873	0.329448	0.422283	0.374223	0.411114			0.00176018	0.00197686	0.0015062	0.0015062	0.0049677	0.00240946	0.00101706	0.00309009			0.00328927	0.00370214	0.00398045	0.00398045	0.0129675	0.00594241
30.009	466.884	2263.6	1796.72	1246.02	1419.18	1392.19	1392.19	1050.29	1214.18	1130.42	1194.39			789.548	962.712	935.719	935.719	593.815	757.712	673.944	737.918			0.439439	0.535816	0.520793	0.520793	0.330499	0.42172	0.375097	0.410703			0.00192918	0.00134765	0.00242601	0.00242601	0.00601892	0.00184617	0.00189134	0.002679			0.00360509	0.00252379	0.00641122	0.00641122	0.0157116	0.00455317
35.011	466.652	2263.03	1796.38	1246.53	1417.47	1392.46	1392.46	1050.2	1215.81	1129.2	1190.03			790.061	961.002	935.985	935.985	593.723	759.334	672.726	733.559			0.439807	0.534966	0.521039	0.521039	0.330511	0.422702	0.37449	0.408354			0.00229783	0.000497027	0.00267254	0.00267254	0.00603019	0.00282882	0.00128422	0.000330099			0.00429398	0.000930802	0.00706273	0.00706273	0.015741	0.00697667
40.012	467.19	2260.27	1793.08	1247.64	1418.29	1392.19	1392.19	1052.13	1215.93	1133.21	1190.99			791.168	961.814	935.717	935.717	595.657	759.454	676.736	734.522			0.441233	0.536402	0.521848	0.521848	0.332197	0.423546	0.377415	0.409642			0.00372379	0.00193342	0.00348101	0.00348101	0.00771642	0.00367288	0.0042091	0.00161792			0.00695869	0.00362079	0.00919928	0.00919928	0.0201427	0.00905837
45.014	462.938	2260.31	1797.37	1249.54	1417.48	1392.53	1392.53	1052.28	1213.94	1131.02	1196			793.069	961.008	936.052	936.052	595.807	757.471	674.548	739.526			0.441238	0.534674	0.520789	0.520789	0.331488	0.421433	0.375297	0.411449			0.00372875	0.000205228	0.00242236	0.00242236	0.00700731	0.0015591	0.00209132	0.00342466			0.00696795	0.000384338	0.00640158	0.00640158	0.0182916	0.00384519
50.016	463.165	2259.21	1796.04	1248.34	1417.02	1393.97	1393.97	1054.78	1215.73	1130.76	1191.55			791.866	960.545	937.493	937.493	598.306	759.262	674.288	735.072			0.440895	0.534812	0.521977	0.521977	0.333125	0.422742	0.37543	0.409273			0.00338561	0.000343284	0.00361025	0.00361025	0.00864412	0.0028683	0.00222441	0.00124938			0.00632673	0.000642882	0.00954081	0.00954081	0.0225643	0.00707405
55.017	463.825	2260.74	1796.92	1249.57	1416.87	1395.63	1395.63	1055.84	1219.82	1129.88	1191.3			793.101	960.396	939.159	939.159	599.368	763.342	673.402	734.822			0.441368	0.534469	0.52265	0.52265	0.333554	0.424806	0.374754	0.408935			0.00385826	0	0.00428327	0.00428327	0.00907296	0.00493305	0.00154857	0.000911003			0.00720997	0	0.0113194	0.0113194	0.0236837	0.0121663
60.019	464.611	2260.23	1795.62	1254.48	1419.13	1395.62	1395.62	1057.23	1219.28	1126.61	1193.99			798.012	962.653	939.15	939.15	600.754	762.809	670.135	737.515			0.444422	0.536112	0.523023	0.523023	0.334566	0.424817	0.373206	0.41073			0.00691225	0.00164324	0.00465601	0.00465601	0.0100859	0.00494325	0	0.00270633			0.012917	0.00307736	0.0123045	0.0123045	0.0263279	0.0121915
65.02	463.956	2259.09	1795.14	1253.21	1419.86	1397.05	1397.05	1060.5	1221.6	1128.11	1195.45			796.735	963.383	940.577	940.577	604.028	765.124	671.634	738.978			0.44383	0.536663	0.523959	0.523959	0.33648	0.426221	0.374141	0.411656			0.00632056	0.00219426	0.00559178	0.00559178	0.0119998	0.00634725	0.000935532	0.00363191			0.0118113	0.00410928	0.0147774	0.0147774	0.0313239	0.0156541
70.022	466.431	2258.09	1791.66	1255.41	1420.08	1397.55	1397.55	1061.19	1219.41	1129.13	1193.99			798.937	963.609	941.074	941.074	604.72	762.937	672.659	737.517			0.445921	0.537832	0.525254	0.525254	0.33752	0.425828	0.37544	0.41164			0.00841178	0.00336293	0.00688703	0.00688703	0.0130397	0.00595457	0.00223444	0.00361615			0.0157192	0.0062979	0.0182004	0.0182004	0.0340384	0.0146857
75.023	461.864	2258.86	1796.99	1254.68	1420.07	1398.29	1398.29	1059.34	1220.54	1132.95	1194.75			798.21	963.601	941.815	941.815	602.862	764.071	676.48	738.278			0.444192	0.53623	0.524106	0.524106	0.335484	0.425194	0.376451	0.410841			0.00668282	0.00176111	0.00573937	0.00573937	0.0110033	0.00532091	0.00324571	0.00281706			0.0124883	0.0032981	0.0151675	0.0151675	0.0287227	0.0131229
80.025	462.773	2257.15	1794.38	1256.81	1419.51	1398.22	1398.22	1061.35	1223.94	1131.66	1191.29			800.34	963.036	941.748	941.748	604.877	767.472	675.189	734.818			0.446026	0.536696	0.524832	0.524832	0.337095	0.427709	0.37628	0.409511			0.00851648	0.00222683	0.00646498	0.00646498	0.0126146	0.00783523	0.00307424	0.00148688			0.0159148	0.00417028	0.017085	0.017085	0.0329288	0.0193239
85.026	461.223	2257.58	1796.35	1248.87	1420.48	1399.47	1399.47	1062.23	1224.85	1134.56	1189.43			792.392	964.007	942.993	942.993	605.755	768.376	678.087	732.955			0.441111	0.536647	0.524949	0.524949	0.337214	0.427742	0.37748	0.408024			0.00360207	0.0021779	0.00658161	0.00658161	0.0127332	0.0078687	0.00427423	0			0.00673123	0.00407864	0.0173932	0.0173932	0.0332382	0.0194064
90.028	462.861	2257.32	1794.46	1256.77	1422.23	1399.59	1399.59	1066.53	1223.65	1135.71	1193.83			800.297	965.756	943.115	943.115	610.052	767.177	679.237	737.357			0.445981	0.538186	0.525569	0.525569	0.339963	0.427524	0.378518	0.410907			0.00847181	0.00371769	0.0072024	0.0072024	0.0154829	0.00765098	0.00531261	0.00288278			0.0158314	0.00696227	0.0190338	0.0190338	0.0404159	0.0188695
95.03	464.488	2255.58	1791.09	1256.54	1419.57	1399.39	1399.39	1064.72	1221.13	1135.47	1189.93			800.066	963.098	942.913	942.913	608.25	764.654	679	733.462			0.446692	0.537716	0.526447	0.526447	0.339598	0.426921	0.379099	0.409506			0.00918299	0.00324753	0.0080797	0.0080797	0.0151172	0.00704772	0.00589335	0.0014822			0.0171603	0.00608178	0.0213523	0.0213523	0.0394614	0.0173817
100.031	464.181	2257.61	1793.43	1253.77	1421.83	1398.53	1398.53	1070.05	1225.85	1137.92	1195.23			797.297	965.36	942.052	942.052	613.579	769.376	681.447	738.754			0.444566	0.538276	0.52528	0.52528	0.342126	0.428997	0.379969	0.411923			0.00705661	0.00380772	0.00691323	0.00691323	0.0176458	0.00912404	0.0067635	0.00389906			0.0131868	0.00713087	0.0182696	0.0182696	0.046062	0.0225025
105.033	464.036	2253.41	1789.38	1257.71	1421.19	1399.7	1399.7	1070.92	1224.62	1139.01	1194.24			801.233	964.721	943.225	943.225	614.451	768.148	682.54	737.768			0.447772	0.539138	0.527124	0.527124	0.343388	0.429282	0.38144	0.412304			0.0102624	0.0046688	0.00875754	0.00875754	0.0189074	0.00940865	0.00823424	0.00428026			0.0191774	0.00874345	0.0231436	0.0231436	0.0493553	0.0232044
110.034	461.71	2253.37	1791.66	1257.8	1422.44	1401.96	1401.96	1073.93	1227.09	1138.45	1195.86			801.329	965.971	945.485	945.485	617.462	770.614	681.978	739.382			0.447254	0.539148	0.527714	0.527714	0.344631	0.430111	0.38064	0.412679			0.00974511	0.00467916	0.00934693	0.00934693	0.0201502	0.0102378	0.00743429	0.00465548			0.0182108	0.00876285	0.0247012	0.0247012	0.0525994	0.0252492
115.036	461.221	2253.64	1792.42	1259.43	1422.3	1402.53	1402.53	1076.8	1227.19	1139.77	1195.39			802.957	965.83	946.055	946.055	620.325	770.717	683.3	738.916			0.447973	0.538841	0.527808	0.527808	0.346082	0.429986	0.381216	0.412244			0.0104638	0.00437198	0.00944127	0.00944127	0.0216014	0.0101129	0.00801051	0.00422058			0.0195538	0.00818759	0.0249505	0.0249505	0.0563876	0.0249413
120.037	461.866	2254.15	1792.28	1262.85	1423.14	1405.65	1405.65	1078.75	1228.5	1138.65	1194.09			806.375	966.665	949.175	949.175	622.274	772.026	682.177	737.616			0.449915	0.539348	0.52959	0.52959	0.347196	0.43075	0.380619	0.411551			0.0124055	0.00487951	0.0112229	0.0112229	0.0227156	0.0108765	0.00741339	0.00352711			0.0231823	0.00913805	0.0296587	0.0296587	0.059296	0.0268245
125.039	463.076	2253.23	1790.15	1262.79	1423.01	1405.68	1405.68	1079.04	1225.33	1142.25	1192.59			806.315	966.539	949.204	949.204	622.564	768.855	685.775	736.113			0.450417	0.53992	0.530237	0.530237	0.347772	0.429492	0.383082	0.411202			0.0129078	0.0054515	0.0118698	0.0118698	0.0232911	0.00961817	0.0098766	0.00317768			0.024121	0.0102092	0.0313684	0.0313684	0.0607983	0.0237211
130.04	460.844	2254.29	1793.45	1262.15	1424.89	1404.68	1404.68	1078.65	1226.05	1142.35	1191.11			805.681	968.414	948.209	948.209	622.181	769.577	685.876	734.633			0.449235	0.539973	0.528707	0.528707	0.346918	0.429104	0.382434	0.40962			0.0117258	0.00550386	0.0103397	0.0103397	0.0224379	0.00923076	0.00922829	0.0015961			0.0219122	0.0103073	0.0273248	0.0273248	0.0585711	0.0227657
135.042	462.026	2253.32	1791.3	1265.75	1424.48	1406.87	1406.87	1082.27	1228.39	1144.83	1194.8			809.273	968.004	950.401	950.401	625.799	771.918	688.356	738.329			0.45178	0.540392	0.530565	0.530565	0.349355	0.430926	0.384277	0.412175			0.0142705	0.00592332	0.0121982	0.0121982	0.0248742	0.0110529	0.0110719	0.00415124			0.0266674	0.0110928	0.0322363	0.0322363	0.0649307	0.0272595
140.043	464.036	2251.4	1787.36	1268.11	1424.92	1406.79	1406.79	1081.92	1230.51	1144.89	1192.89			811.635	968.446	950.315	950.315	625.452	774.038	688.416	736.417			0.454097	0.54183	0.531686	0.531686	0.349931	0.433062	0.385158	0.412014			0.0165877	0.00736159	0.0133194	0.0133194	0.02545	0.0131887	0.0119524	0.00398991			0.0309976	0.0137863	0.0351993	0.0351993	0.0664338	0.032527
145.045	464.246	2253.16	1788.91	1265.11	1427.68	1407.24	1407.24	1084.69	1231.79	1142.55	1199.99			808.632	971.212	950.768	950.768	628.221	775.316	686.081	743.516			0.452024	0.542906	0.531477	0.531477	0.351174	0.4334	0.383518	0.415624			0.0145143	0.00843686	0.0131106	0.0131106	0.0266938	0.0135267	0.0103124	0.00760014			0.0271231	0.0158	0.0346473	0.0346473	0.0696804	0.0333607
150.047	461.899	2252.34	1790.44	1265.95	1426.62	1407.47	1407.47	1083.29	1230.79	1143.15	1193.87			809.48	970.143	950.994	950.994	626.815	774.316	686.679	737.397			0.452113	0.541847	0.531152	0.531152	0.35009	0.432473	0.383526	0.411853			0.0146036	0.00737811	0.0127848	0.0127848	0.0256098	0.0125996	0.0103203	0.00382909			0.0272898	0.0138173	0.0337865	0.0337865	0.0668509	0.0310742
155.048	460.215	2253.69	1793.48	1264.68	1428.21	1409.2	1409.2	1088.24	1234.38	1145.32	1198.93			808.212	971.734	952.727	952.727	631.768	777.904	688.851	742.454			0.450639	0.541815	0.531217	0.531217	0.352258	0.43374	0.384087	0.413974			0.0131299	0.00734643	0.0128504	0.0128504	0.0277779	0.0138669	0.010881	0.00595039			0.024536	0.013758	0.0339599	0.0339599	0.0725103	0.0341996
160.05	463.477	2249.6	1786.12	1264.05	1426.38	1406.5	1406.5	1086.03	1232.01	1143.84	1196.2			807.58	969.903	950.027	950.027	629.555	775.536	687.371	739.727			0.452141	0.543021	0.531893	0.531893	0.35247	0.434201	0.38484	0.414152			0.0146318	0.00855242	0.0135263	0.0135263	0.0279894	0.0143272	0.011634	0.00612831			0.0273425	0.0160165	0.0357459	0.0357459	0.0730626	0.0353349
165.051	461.425	2253.62	1792.2	1267.93	1429.1	1411.41	1411.41	1087.7	1232.47	1145.08	1199.08			811.461	972.631	954.941	954.941	631.231	775.996	688.605	742.609			0.452775	0.542703	0.532833	0.532833	0.352211	0.432986	0.384224	0.414357			0.0152653	0.00823472	0.014466	0.014466	0.0277304	0.0131127	0.0110186	0.00633317			0.0285265	0.0154215	0.0382293	0.0382293	0.0723863	0.0323396
170.053	461.31	2251.68	1790.37	1268.68	1430.74	1409.01	1409.01	1090.41	1231.57	1147.26	1196.35			812.203	974.264	952.541	952.541	633.937	775.094	690.782	739.873			0.453652	0.54417	0.532037	0.532037	0.354082	0.432925	0.385833	0.413252			0.0161422	0.00970114	0.0136697	0.0136697	0.0296015	0.0130511	0.012627	0.00522822			0.0301652	0.0181677	0.036125	0.036125	0.0772707	0.0321878
175.054	460.76	2251.51	1790.75	1269.91	1431.89	1410.18	1410.18	1088.95	1234.44	1150.83	1192.43			813.441	975.413	953.709	953.709	632.477	777.966	694.352	735.957			0.454245	0.544694	0.532574	0.532574	0.353191	0.434435	0.387743	0.410976			0.0167359	0.0102256	0.0142074	0.0142074	0.02871	0.0145617	0.0145376	0.00295247			0.0312746	0.0191499	0.037546	0.037546	0.0749435	0.0359134
180.056	461.244	2249.4	1788.16	1271.06	1431.04	1411.68	1411.68	1092.01	1232.48	1146.88	1197.17			814.586	974.569	955.21	955.21	635.532	776.007	690.411	740.701			0.455545	0.545013	0.534186	0.534186	0.355411	0.43397	0.386102	0.414226			0.0180352	0.0105438	0.0158195	0.0158195	0.0309308	0.0140964	0.0128961	0.00620168			0.0337026	0.0197458	0.0418061	0.0418061	0.0807407	0.0347658
185.057	460.494	2249.1	1788.61	1270.72	1431.3	1410.31	1410.31	1094.2	1235.28	1147.62	1196.48			814.247	974.83	953.832	953.832	637.725	778.808	691.148	740.003			0.455241	0.545022	0.533282	0.533282	0.356548	0.435427	0.386417	0.413731			0.0177314	0.0105531	0.014915	0.014915	0.0320678	0.0155536	0.0132113	0.00570754			0.0331349	0.0197631	0.0394161	0.0394161	0.0837086	0.0383596
190.059	460.333	2247.24	1786.91	1271.31	1431.92	1411.6	1411.6	1093.69	1235.71	1147.54	1199.68			814.839	975.45	955.131	955.131	637.215	779.242	691.07	743.206			0.456005	0.545888	0.534517	0.534517	0.356602	0.436084	0.386741	0.415918			0.0184961	0.0114189	0.0161497	0.0161497	0.0321218	0.016211	0.0135356	0.00789391			0.0345639	0.0213846	0.0426789	0.0426789	0.0838496	0.039981
195.061	460.249	2247.44	1787.2	1273.38	1433.67	1412.49	1412.49	1094.9	1236.82	1146.43	1198.61			816.908	977.202	956.02	956.02	638.429	780.344	689.96	742.134			0.457089	0.54678	0.534928	0.534928	0.357224	0.436631	0.386057	0.415251			0.0195801	0.0123109	0.0165607	0.0165607	0.0327434	0.0167571	0.0128519	0.00722683			0.0365895	0.0230552	0.043765	0.043765	0.0854723	0.0413278
200.062	461.377	2249.34	1787.96	1277.62	1435.04	1414.27	1414.27	1096.7	1237.04	1153.36	1203.01			821.146	978.563	957.793	957.793	640.224	780.569	696.89	746.537			0.459264	0.547306	0.53569	0.53569	0.358075	0.436569	0.389768	0.417535			0.0217544	0.0128377	0.017323	0.017323	0.0335942	0.0166958	0.0165623	0.00951137			0.0406526	0.0240417	0.0457795	0.0457795	0.0876931	0.0411765
205.064	457.984	2248.28	1790.3	1271.39	1433.28	1413.55	1413.55	1096.49	1234.49	1151.47	1197.32			814.919	976.805	957.074	957.074	640.013	778.016	694.998	740.848			0.455185	0.545609	0.534588	0.534588	0.357489	0.434573	0.388202	0.413812			0.0176761	0.0111406	0.0162214	0.0162214	0.0330085	0.0146993	0.0149963	0.00578815			0.0330316	0.0208635	0.0428685	0.0428685	0.0861642	0.0362527
210.065	459.81	2248.64	1788.83	1276.49	1435.54	1416	1416	1097.98	1236.41	1153.99	1198.38			820.022	979.062	959.531	959.531	641.504	779.941	697.515	741.909			0.458413	0.547321	0.536402	0.536402	0.358617	0.436007	0.389929	0.414746			0.0209038	0.0128518	0.0180353	0.0180353	0.0341365	0.0161334	0.0167231	0.00672216			0.0390632	0.0240681	0.0476621	0.0476621	0.0891087	0.0397896
215.067	458.968	2248.99	1790.02	1280.18	1437.31	1417.9	1417.9	1098.09	1238.68	1154.71	1202.31			823.704	980.841	961.425	961.425	641.614	782.21	698.239	745.833			0.460165	0.54795	0.537103	0.537103	0.35844	0.436984	0.390074	0.416662			0.0226557	0.0134815	0.0187365	0.0187365	0.0339593	0.0171109	0.0168681	0.00863834			0.042337	0.0252473	0.049515	0.049515	0.0886462	0.0422003
220.068	459.066	2247.96	1788.89	1278.59	1437.4	1419.21	1419.21	1100.46	1240.73	1152.15	1204.36			822.117	980.926	962.74	962.74	643.989	784.26	695.681	747.887			0.459568	0.548343	0.538177	0.538177	0.359994	0.438406	0.38889	0.418073			0.0220588	0.0138746	0.0198104	0.0198104	0.035513	0.0185325	0.0156842	0.0100493			0.0412216	0.0259835	0.0523529	0.0523529	0.0927019	0.0457063
225.07	459.077	2249.99	1790.91	1282.1	1436.33	1418.21	1418.21	1101.07	1239.11	1153.92	1203.78			825.629	979.859	961.742	961.742	644.592	782.635	697.45	747.302			0.46101	0.547128	0.537012	0.537012	0.359923	0.437003	0.389438	0.417274			0.0235004	0.012659	0.0186448	0.0186448	0.0354429	0.0171296	0.0162324	0.00925016			0.0439155	0.0237071	0.0492728	0.0492728	0.0925187	0.0422465
230.071	457.958	2245.61	1787.65	1277.67	1436.94	1418.87	1418.87	1099.41	1240.47	1154.64	1205.19			821.193	980.47	962.396	962.396	642.942	784.002	698.168	748.717			0.45937	0.548468	0.538358	0.538358	0.359657	0.438565	0.39055	0.418827			0.0218605	0.0139996	0.0199909	0.0199909	0.0351769	0.018692	0.017345	0.0108034			0.0408509	0.0262175	0.0528301	0.0528301	0.0918244	0.0460998
235.073	458.662	2248.53	1789.86	1279.15	1440.73	1422.61	1422.61	1105.32	1242.41	1161.69	1206.66			822.677	984.259	966.136	966.136	648.843	785.933	705.214	750.189			0.459631	0.549907	0.539782	0.539782	0.36251	0.439102	0.394004	0.419132			0.0221216	0.0154384	0.0214149	0.0214149	0.0380291	0.0192286	0.0207987	0.011108			0.0413389	0.028912	0.0565931	0.0565931	0.0992697	0.0474232
240.075	459.937	2241.91	1781.98	1279.28	1437	1419.56	1419.56	1104.65	1239.99	1161.45	1206.67			822.805	980.525	963.087	963.087	648.178	783.52	704.979	750.194			0.461737	0.550246	0.54046	0.54046	0.363741	0.439691	0.395616	0.42099			0.0242278	0.0157768	0.0220929	0.0220929	0.0392604	0.019818	0.0224107	0.0129658			0.0452747	0.0295459	0.058385	0.058385	0.102484	0.0488767
245.076	458.101	2245.01	1786.91	1281.22	1438.63	1420.3	1420.3	1106.97	1241.51	1161.92	1205.82			824.749	982.154	963.829	963.829	650.498	785.032	705.449	749.349			0.461551	0.549639	0.539384	0.539384	0.364036	0.439325	0.394788	0.419356			0.0240421	0.0151707	0.0210174	0.0210174	0.0395554	0.0194513	0.0215825	0.0113317			0.0449277	0.0284108	0.0555428	0.0555428	0.103254	0.0479725
250.078	457.458	2248.3	1790.84	1285.54	1439.9	1420.41	1420.41	1111.94	1240.57	1165.15	1210.61			829.068	983.423	963.94	963.94	655.464	784.098	708.681	754.14			0.462949	0.54914	0.538261	0.538261	0.366009	0.437838	0.395725	0.421109			0.0254396	0.0146715	0.0198941	0.0198941	0.0415285	0.0179644	0.0225197	0.0130855			0.0475392	0.027476	0.0525743	0.0525743	0.108404	0.0443053
255.079	457.432	2246.68	1789.25	1280.35	1439.85	1423.1	1423.1	1106.44	1242.26	1165.97	1210.05			823.88	983.372	966.625	966.625	649.968	785.791	709.502	753.579			0.460461	0.5496	0.54024	0.54024	0.363263	0.439173	0.396536	0.42117			0.0229514	0.015131	0.0218731	0.0218731	0.038782	0.0192997	0.0233302	0.0131462			0.0428895	0.0283364	0.057804	0.057804	0.101235	0.0475984
260.081	459.169	2246.18	1787.02	1281.59	1441.35	1423.85	1423.85	1107.55	1243.14	1168.29	1211.2			825.117	984.874	967.372	967.372	651.072	786.672	711.816	754.725			0.461729	0.551128	0.541334	0.541334	0.364335	0.440215	0.398327	0.422338			0.0242196	0.016659	0.0229669	0.0229669	0.0398542	0.0203421	0.0251211	0.0143143			0.0452595	0.031198	0.0606947	0.0606947	0.104034	0.0501693
265.082	459.732	2244.78	1785.05	1284.41	1440.45	1423.13	1423.13	1109.75	1243.63	1165.85	1210.4			827.933	983.981	966.658	966.658	653.279	787.159	709.381	753.932			0.463816	0.551236	0.541531	0.541531	0.365973	0.440974	0.397402	0.42236			0.0263066	0.0167668	0.0231642	0.0231642	0.0414926	0.0211006	0.0241965	0.0143361			0.0491595	0.0313999	0.0612161	0.0612161	0.108311	0.05204
270.084	458.501	2246.59	1788.09	1286.67	1442.31	1425.6	1425.6	1112.84	1246.17	1167.23	1209.72			830.194	985.835	969.122	969.122	656.37	789.7	710.761	753.244			0.46429	0.551333	0.541986	0.541986	0.367078	0.441643	0.397496	0.421255			0.0267804	0.016864	0.023619	0.023619	0.0425974	0.0217699	0.0242908	0.0132313			0.0500449	0.0315819	0.0624181	0.0624181	0.111195	0.0536908
275.085	457.887	2244.75	1786.87	1280.87	1444.16	1426.21	1426.21	1112.01	1242.86	1165.57	1209.85			824.393	987.683	969.74	969.74	655.54	786.386	709.093	753.375			0.461363	0.552746	0.542705	0.542705	0.366866	0.440092	0.396836	0.421618			0.0238533	0.0182774	0.0243376	0.0243376	0.0423853	0.020219	0.0236307	0.0135943			0.0445749	0.0342288	0.0643171	0.0643171	0.110641	0.0498658
280.087	458.619	2240.09	1781.47	1283.48	1443.88	1427.02	1427.02	1113.05	1244.43	1166.3	1209.93			827.004	987.408	970.545	970.545	656.58	787.96	709.822	753.46			0.464226	0.554266	0.544801	0.544801	0.368561	0.442309	0.398448	0.422943			0.0267167	0.0197976	0.0264337	0.0264337	0.0440806	0.0224359	0.0252422	0.0149194			0.0499257	0.0370758	0.0698564	0.0698564	0.115066	0.0553332
285.089	459.623	2244.82	1785.2	1282.59	1445.83	1427.65	1427.65	1117.31	1246.22	1168.3	1212.28			826.119	989.358	971.179	971.179	660.838	789.744	711.822	755.808			0.46276	0.5542	0.544017	0.544017	0.370176	0.442384	0.398735	0.423375			0.0252507	0.0197315	0.0256502	0.0256502	0.0456955	0.0225108	0.0255298	0.0153507			0.0471863	0.0369521	0.0677859	0.0677859	0.119282	0.055518
290.09	458.585	2243.52	1784.93	1287.7	1446.37	1427.53	1427.53	1117.16	1248.02	1164.32	1212.7			831.224	989.9	971.061	971.061	660.684	791.543	707.85	756.232			0.465689	0.554586	0.544032	0.544032	0.370145	0.443458	0.396569	0.423675			0.0281793	0.0201173	0.0256647	0.0256647	0.045664	0.0235842	0.0233636	0.015651			0.052659	0.0376745	0.0678243	0.0678243	0.1192	0.0581654
295.092	458.159	2242.71	1784.55	1288.02	1445.72	1428.01	1428.01	1117.21	1250.24	1161.92	1214.01			831.547	989.244	971.537	971.537	660.733	793.769	705.446	757.537			0.46597	0.554338	0.544416	0.544416	0.370252	0.444801	0.395308	0.424498			0.0284609	0.0198695	0.0260489	0.0260489	0.0457714	0.0249273	0.0221021	0.0164738			0.0531852	0.0372103	0.0688396	0.0688396	0.11948	0.0614779
300.093	459.547	2242.22	1782.67	1289.64	1445.88	1430.64	1430.64	1115.9	1249.5	1164.31	1211.11			833.163	989.406	974.17	974.17	659.43	793.029	707.839	754.632			0.467367	0.555012	0.546466	0.546466	0.369911	0.444854	0.397066	0.423315			0.0298577	0.0205436	0.0280987	0.0280987	0.0454301	0.0249802	0.0238604	0.0152908			0.0557953	0.0384728	0.0742566	0.0742566	0.118589	0.0616083
305.095	460.276	2239.68	1779.41	1286.52	1446.19	1428.48	1428.48	1118.22	1249.04	1161.6	1211.99			830.051	989.715	972.01	972.01	661.748	792.57	705.127	755.516			0.466477	0.556205	0.546256	0.546256	0.371893	0.445413	0.396271	0.424589			0.0289672	0.0217367	0.0278886	0.0278886	0.0474122	0.0255394	0.0230656	0.0165652			0.0541314	0.0407072	0.0737013	0.0737013	0.123763	0.0629874
310.096	457.77	2237.71	1779.94	1287.5	1445.31	1430.83	1430.83	1119.85	1250.52	1160.73	1211.34			831.023	988.839	974.359	974.359	663.377	794.044	704.257	754.865			0.466883	0.555547	0.547412	0.547412	0.372697	0.446108	0.395664	0.424096			0.0293736	0.0210779	0.0290447	0.0290447	0.048216	0.0262341	0.0224581	0.0160722			0.0548907	0.0394735	0.0767565	0.0767565	0.125861	0.0647007
315.098	458.72	2237.82	1779.1	1285.82	1448.65	1431.28	1431.28	1118.65	1250.88	1162.37	1215.96			829.343	992.175	974.808	974.808	662.182	794.405	705.901	759.49			0.466158	0.557682	0.547921	0.547921	0.3722	0.44652	0.396773	0.426895			0.0286483	0.0232136	0.0295538	0.0295538	0.0477191	0.0266463	0.0235678	0.0188708			0.0535354	0.0434731	0.078102	0.078102	0.124564	0.0657172
320.099	459.21	2243.89	1784.68	1288.43	1448.87	1433.07	1433.07	1126.03	1254.5	1167.17	1220.18			831.959	992.392	976.6	976.6	669.552	798.024	710.698	763.704			0.466166	0.55606	0.547212	0.547212	0.375166	0.447151	0.398221	0.427921			0.0286567	0.0215916	0.0288449	0.0288449	0.0506851	0.027278	0.0250152	0.0198973			0.053551	0.0404355	0.0762285	0.0762285	0.132306	0.0672754
325.101	458.044	2237.93	1779.89	1286.87	1448.22	1433.45	1433.45	1121.64	1253.37	1167.29	1214.1			830.4	991.747	976.975	976.975	665.165	796.896	710.817	757.626			0.466547	0.557197	0.548898	0.548898	0.373712	0.447723	0.399361	0.42566			0.0290374	0.0227283	0.0305307	0.0305307	0.0492316	0.0278497	0.0261555	0.0176361			0.0542626	0.0425641	0.0806836	0.0806836	0.128512	0.0686852
330.103	460.361	2239.73	1779.37	1287.56	1450.97	1433.22	1433.22	1123.46	1254.72	1169.36	1217.76			831.087	994.494	976.743	976.743	666.985	798.243	712.887	761.286			0.467068	0.558902	0.548926	0.548926	0.374843	0.44861	0.40064	0.42784			0.0295589	0.0244337	0.0305595	0.0305595	0.0503629	0.0287366	0.0274347	0.0198164			0.0552369	0.0457579	0.0807598	0.0807598	0.131465	0.0708725
335.104	460.676	2237.63	1776.95	1289.99	1450.81	1433.06	1433.06	1122.93	1255.79	1166.07	1218.27			833.513	994.334	976.588	976.588	666.461	799.314	709.601	761.794			0.469069	0.559572	0.549586	0.549586	0.375058	0.449823	0.399336	0.428708			0.0315592	0.0251036	0.0312187	0.0312187	0.0505777	0.0299493	0.0261302	0.0206841			0.058975	0.0470125	0.0825018	0.0825018	0.132026	0.0738634
340.106	458.114	2237.89	1779.78	1290.36	1451.55	1435.93	1435.93	1123.98	1255.85	1170.1	1220.86			833.888	995.079	979.457	979.457	667.512	799.38	713.624	764.383			0.468535	0.559103	0.550325	0.550325	0.375053	0.449146	0.400962	0.429482			0.0310253	0.0246339	0.0319582	0.0319582	0.0505728	0.0292723	0.0277567	0.0214582			0.0579772	0.0461328	0.0844561	0.0844561	0.132013	0.0721937
345.107	458.963	2237.76	1778.79	1291.72	1452.56	1435.07	1435.07	1124.75	1255.35	1170.63	1220.01			835.246	996.089	978.593	978.593	668.277	798.879	714.161	763.534			0.469558	0.559981	0.550145	0.550145	0.375692	0.449113	0.401487	0.429243			0.0320486	0.0255119	0.0317778	0.0317778	0.0512109	0.0292398	0.028281	0.0212192			0.0598896	0.0477771	0.0839794	0.0839794	0.133679	0.0721136
350.109	458.48	2238.09	1779.61	1291.25	1454.29	1435.78	1435.78	1125.64	1256.56	1169.7	1221.8			834.775	997.819	979.302	979.302	669.168	800.091	713.229	765.33			0.469077	0.560695	0.55029	0.55029	0.376019	0.449588	0.400778	0.430055			0.0315679	0.0262263	0.031923	0.031923	0.0515387	0.0297142	0.0275725	0.0220308			0.0589912	0.049115	0.0843632	0.0843632	0.134535	0.0732835
355.11	458.792	2237.22	1778.43	1298.33	1454.06	1436.38	1436.38	1126.31	1255.64	1170.08	1221.45			841.858	997.585	979.902	979.902	669.837	799.17	713.606	764.973			0.473371	0.560935	0.550992	0.550992	0.376645	0.449368	0.401256	0.430139			0.0358613	0.0264661	0.0326249	0.0326249	0.052164	0.0294941	0.02805	0.0221149			0.0670144	0.0495641	0.086218	0.086218	0.136167	0.0727408
360.112	458.806	2236.76	1777.95	1292.74	1455.26	1437.13	1437.13	1129.49	1258.28	1173.26	1222			836.264	998.789	980.656	980.656	673.013	801.809	716.791	765.529			0.470352	0.561763	0.551564	0.551564	0.378532	0.450973	0.403155	0.430567			0.0328426	0.0272944	0.0331975	0.0331975	0.0540518	0.0310995	0.0299495	0.0225436			0.0613732	0.0511154	0.0877311	0.0877311	0.141095	0.0767001
365.113	459.176	2240.34	1781.16	1294.53	1457.48	1441.09	1441.09	1130.6	1260.94	1178.83	1223.25			838.052	1001.01	984.612	984.612	674.131	804.466	722.352	766.777			0.470509	0.561998	0.552793	0.552793	0.378479	0.451653	0.405551	0.430493			0.0329998	0.0275296	0.0344257	0.0344257	0.0539981	0.0317794	0.0323459	0.0224692			0.061667	0.0515558	0.0909769	0.0909769	0.140955	0.0783771
370.115	457.888	2234.81	1776.92	1291.31	1455.53	1438.83	1438.83	1133.47	1259.68	1174.55	1221.78			834.834	999.061	982.354	982.354	677.001	803.209	718.081	765.306			0.46982	0.562242	0.55284	0.55284	0.380996	0.452022	0.404115	0.430692			0.0323107	0.0277734	0.0344731	0.0344731	0.0565157	0.032149	0.0309094	0.0226679			0.0603793	0.0520124	0.0911021	0.0911021	0.147527	0.0792885
375.116	457.696	2233.12	1775.42	1295.88	1456.31	1435.79	1435.79	1130.57	1258.03	1172.85	1221.44			839.404	999.839	979.316	979.316	674.092	801.555	716.377	764.965			0.472791	0.563155	0.551596	0.551596	0.37968	0.451473	0.403497	0.430864			0.0352816	0.0286866	0.033229	0.033229	0.0551991	0.0315993	0.030291	0.0228397			0.0659311	0.0537226	0.0878143	0.0878143	0.14409	0.0779327
380.118	456.499	2233.54	1777.04	1295.44	1457.5	1441.02	1441.02	1131.34	1259.93	1175.76	1225.2			838.965	1001.02	984.547	984.547	674.87	803.46	719.282	768.731			0.472114	0.56331	0.554038	0.554038	0.379772	0.452134	0.404764	0.432591			0.0346043	0.028841	0.0356707	0.0356707	0.0552914	0.0322604	0.0315586	0.0245668			0.0646655	0.0540117	0.094267	0.094267	0.144331	0.0795633
385.12	457.373	2234.47	1777.1	1301.8	1455.4	1438.61	1438.61	1132.67	1259.02	1172.72	1220.66			845.324	998.927	982.134	982.134	676.195	802.548	716.249	764.185			0.475676	0.562111	0.552661	0.552661	0.380505	0.451605	0.403044	0.430018			0.0381666	0.0276419	0.0342941	0.0342941	0.0560241	0.0317319	0.0298381	0.0219941			0.0713224	0.0517661	0.0906291	0.0906291	0.146243	0.0782599
390.121	459.577	2234.78	1775.2	1298.12	1457.61	1440.16	1440.16	1135.39	1263.3	1173.61	1226.74			841.652	1001.14	983.685	983.685	678.913	806.825	717.139	770.264			0.474117	0.563957	0.554127	0.554127	0.382443	0.454499	0.403977	0.433903			0.0366078	0.0294885	0.0357599	0.0357599	0.0579629	0.0346251	0.0307713	0.0258792			0.0684094	0.0552243	0.0945029	0.0945029	0.151304	0.0853952
395.123	460.348	2232.46	1772.11	1301.19	1457.02	1439.83	1439.83	1137.1	1262.61	1173.17	1226.87			844.715	1000.54	983.355	983.355	680.63	806.139	716.698	770.401			0.476672	0.564606	0.554906	0.554906	0.384079	0.454904	0.404432	0.434737			0.0391626	0.0301368	0.0365395	0.0365395	0.0595984	0.0350301	0.0312266	0.0267128			0.0731835	0.0564384	0.096563	0.096563	0.155573	0.0863942
400.124	458.319	2232.59	1774.27	1301.02	1459.12	1443.06	1443.06	1136.37	1265.71	1175.7	1230			844.546	1002.65	986.59	986.59	679.9	809.235	719.225	773.525			0.475997	0.565105	0.556055	0.556055	0.3832	0.456095	0.405364	0.435968			0.0384874	0.0306363	0.0376877	0.0376877	0.0587197	0.0362216	0.0321588	0.0279446			0.0719219	0.0573739	0.0995974	0.0995974	0.15328	0.0893328
405.126	460.219	2236.44	1776.22	1304.51	1459.14	1443.56	1443.56	1135.78	1268.54	1177.31	1230.63			848.038	1002.67	987.091	987.091	679.309	812.069	720.837	774.158			0.477439	0.564493	0.555725	0.555725	0.382446	0.457189	0.405826	0.435845			0.0399295	0.0300245	0.0373577	0.0373577	0.0579652	0.0373152	0.0326202	0.0278211			0.0746167	0.0562281	0.0987254	0.0987254	0.15131	0.0920297
410.127	458.433	2233.12	1774.69	1300.38	1460.25	1444.97	1444.97	1137.3	1266.94	1177.29	1226.75			843.907	1003.77	988.497	988.497	680.828	810.463	720.819	770.279			0.475523	0.565606	0.556997	0.556997	0.383632	0.456678	0.406166	0.434036			0.038014	0.0311367	0.0386298	0.0386298	0.0591513	0.0368049	0.0329604	0.0260117			0.0710371	0.058311	0.102087	0.102087	0.154406	0.0907714
415.129	458.128	2233.54	1775.41	1301.68	1462.11	1445.67	1445.67	1141.79	1268.34	1177.32	1227.08			845.21	1005.63	989.195	989.195	685.315	811.869	720.844	770.603			0.476064	0.566423	0.557164	0.557164	0.386003	0.457285	0.406015	0.434042			0.0385549	0.0319543	0.0387968	0.0387968	0.0615229	0.0374115	0.0328096	0.026018			0.0720479	0.059842	0.102529	0.102529	0.160597	0.0922674
420.13	457.692	2235.31	1777.62	1305.26	1463.67	1447.95	1447.95	1140.53	1270.02	1177.19	1228.41			848.789	1007.2	991.482	991.482	684.06	813.551	720.719	771.942			0.477487	0.5666	0.557759	0.557759	0.384819	0.457664	0.405441	0.434257			0.0399776	0.0321314	0.0393922	0.0393922	0.060338	0.0377904	0.0322356	0.0262328			0.0747066	0.0601737	0.104102	0.104102	0.157504	0.0932018
425.132	457.212	2230.05	1772.84	1300.36	1461.73	1443.81	1443.81	1141.88	1267.47	1180.35	1227.03			843.884	1005.25	987.333	987.333	685.407	810.999	723.876	770.553			0.476007	0.567031	0.556922	0.556922	0.386615	0.457457	0.408314	0.434643			0.0384975	0.0325621	0.0385547	0.0385547	0.0621347	0.0375841	0.0351088	0.0266194			0.0719406	0.0609803	0.101889	0.101889	0.162194	0.0926929
430.134	456.799	2231.03	1774.23	1303.97	1463.86	1445.65	1445.65	1143.44	1268.09	1181.85	1229.33			847.5	1007.38	989.177	989.177	686.967	811.621	725.372	772.856			0.477673	0.567788	0.557526	0.557526	0.387192	0.457451	0.408838	0.435602			0.0401635	0.0333189	0.0391588	0.0391588	0.0627118	0.0375772	0.0356329	0.0275778			0.075054	0.0623977	0.103485	0.103485	0.163701	0.0926759
435.135	459.224	2232.92	1773.69	1308.84	1462.96	1447.27	1447.27	1139.81	1271.42	1180.18	1232.13			852.369	1006.49	990.794	990.794	683.338	814.944	723.712	775.654			0.480561	0.567454	0.558605	0.558605	0.385263	0.459461	0.408025	0.43731			0.0430521	0.0329848	0.0402379	0.0402379	0.060782	0.039588	0.0348197	0.0292861			0.0804519	0.0617719	0.106337	0.106337	0.158663	0.0976351
440.137	460.965	2231.83	1770.86	1312.72	1466.23	1448.94	1448.94	1142.31	1271	1181.27	1230.44			856.252	1009.76	992.463	992.463	685.84	814.526	724.8	773.97			0.483522	0.570207	0.56044	0.56044	0.387291	0.459959	0.409292	0.437058			0.0460126	0.0357386	0.0420729	0.0420729	0.0628105	0.040086	0.0360861	0.0290338			0.0859842	0.066929	0.111186	0.111186	0.163958	0.0988635
445.138	457.951	2230.09	1772.14	1311.34	1466.36	1450.4	1450.4	1141.64	1268.55	1179.86	1232.73			854.87	1009.89	993.929	993.929	685.172	812.081	723.388	776.257			0.482395	0.569871	0.560865	0.560865	0.386636	0.45825	0.408201	0.438035			0.044886	0.0354025	0.0424982	0.0424982	0.0621558	0.0383765	0.0349958	0.030011			0.083879	0.0662996	0.11231	0.11231	0.162249	0.0946474
450.14	458.323	2231.93	1773.61	1308.73	1465.78	1449.05	1449.05	1146.02	1271.15	1180.03	1231.32			852.254	1009.31	992.577	992.577	689.543	814.681	723.56	774.845			0.480519	0.569068	0.559636	0.559636	0.388779	0.459334	0.407959	0.436874			0.0430096	0.0345994	0.0412691	0.0412691	0.0642984	0.039461	0.034753	0.0288502			0.0803724	0.0647957	0.109062	0.109062	0.167842	0.0973221
455.141	457.465	2227.26	1769.8	1314.49	1465.42	1450.09	1450.09	1141.85	1273.89	1181.21	1231.87			858.022	1008.95	993.618	993.618	685.377	817.418	724.739	775.396			0.484814	0.570092	0.561431	0.561431	0.387263	0.461871	0.409504	0.438127			0.0473046	0.0356229	0.0430638	0.0430638	0.0627827	0.0419978	0.0362987	0.0301034			0.0883987	0.0667124	0.113805	0.113805	0.163886	0.103579
460.143	457.144	2229.32	1772.18	1305.21	1467.99	1451.56	1451.56	1146.93	1274.69	1184.98	1234.98			848.737	1011.52	995.084	995.084	690.455	818.215	728.511	778.504			0.478924	0.570777	0.561504	0.561504	0.389609	0.461701	0.411083	0.439293			0.0414145	0.0363083	0.0431374	0.0431374	0.0651282	0.0418275	0.0378774	0.031269			0.0773917	0.067996	0.113999	0.113999	0.170008	0.103158
465.144	457.903	2230.92	1773.01	1312.29	1469.89	1453.73	1453.73	1146.1	1276.88	1185.49	1237.53			855.813	1013.41	997.253	997.253	689.624	820.409	729.022	781.06			0.482688	0.571577	0.562462	0.562462	0.388956	0.46272	0.411177	0.440527			0.0451788	0.0371082	0.044095	0.044095	0.0644751	0.0428465	0.0379711	0.0325028			0.0844261	0.0694939	0.11653	0.11653	0.168304	0.105672
470.146	458.048	2228.73	1770.68	1307.68	1468.46	1450.12	1450.12	1145.48	1273.67	1188.56	1236.52			851.205	1011.98	993.646	993.646	689.006	817.197	732.087	780.047			0.480721	0.571522	0.561165	0.561165	0.389119	0.461515	0.413449	0.440535			0.043212	0.0370537	0.0427986	0.0427986	0.0646383	0.0416418	0.0402435	0.0325107			0.0807507	0.069392	0.113104	0.113104	0.168729	0.1027
475.148	457.985	2227.74	1769.76	1313.4	1469.8	1452.91	1452.91	1148.38	1276.81	1184.89	1239.29			856.932	1013.32	996.435	996.435	691.903	820.34	728.422	782.82			0.484208	0.572576	0.563034	0.563034	0.390959	0.463532	0.411594	0.442331			0.046699	0.0381076	0.0446674	0.0446674	0.0664784	0.0436587	0.0383884	0.0343076			0.0872669	0.0713656	0.118043	0.118043	0.173533	0.107675
480.149	457.979	2229.71	1771.73	1316.68	1470.27	1454.23	1454.23	1146.62	1277.31	1185.28	1234.12			860.212	1013.79	997.754	997.754	690.145	820.839	728.804	777.652			0.485521	0.572205	0.563152	0.563152	0.389532	0.463298	0.411352	0.438922			0.0480116	0.0377358	0.0447855	0.0447855	0.0650511	0.0434246	0.0381461	0.0308986			0.0897197	0.0706694	0.118355	0.118355	0.169807	0.107097
485.151	457.886	2230.74	1772.86	1316.68	1471.3	1456.09	1456.09	1146.98	1279.84	1185.4	1241.67			860.211	1014.83	999.613	999.613	690.509	823.371	728.927	785.199			0.485212	0.572424	0.563843	0.563843	0.389489	0.464432	0.411159	0.4429			0.0477022	0.0379551	0.0454759	0.0454759	0.0650087	0.0445581	0.0379538	0.0348764			0.0891416	0.07108	0.120179	0.120179	0.169696	0.109893
490.152	457.035	2229.02	1771.99	1313.94	1471.35	1457.69	1457.69	1146.95	1280.91	1182.36	1240.72			857.47	1014.88	1001.22	1001.22	690.474	824.435	725.885	784.245			0.483903	0.572734	0.565026	0.565026	0.38966	0.46526	0.409644	0.442579			0.0463932	0.0382657	0.0466587	0.0466587	0.0651799	0.0453863	0.0364387	0.0345551			0.0866955	0.0716617	0.123305	0.123305	0.170143	0.111935
495.154	458.385	2228.6	1770.21	1314.72	1472.3	1457.08	1457.08	1147.85	1283.16	1186.21	1240.19			858.243	1015.83	1000.61	1000.61	691.374	826.688	729.735	783.713			0.484825	0.573847	0.565249	0.565249	0.39056	0.466999	0.41223	0.442723			0.0473155	0.0393782	0.0468817	0.0468817	0.0660794	0.0471259	0.0390247	0.0346987			0.088419	0.0737452	0.123894	0.123894	0.172491	0.116226
500.155	457.164	2228.13	1770.96	1316.05	1473.83	1460	1460	1148.01	1282.89	1186.36	1240.6			859.577	1017.36	1003.52	1003.52	691.533	826.422	729.89	784.122			0.485373	0.574466	0.566655	0.566655	0.390484	0.466652	0.412143	0.442766			0.0478636	0.0399976	0.0482879	0.0482879	0.0660039	0.0467781	0.0389378	0.0347423			0.0894432	0.0749051	0.127611	0.127611	0.172294	0.115368
505.157	457.143	2229	1771.86	1315.18	1473.13	1458.27	1458.27	1146.42	1281.76	1186.74	1240.94			858.71	1016.65	1001.79	1001.79	689.947	825.291	730.268	784.471			0.484638	0.573778	0.565391	0.565391	0.389392	0.465777	0.412148	0.442739			0.0471286	0.0393089	0.0470241	0.0470241	0.0649111	0.0459035	0.0389424	0.0347151			0.0880697	0.0736154	0.124271	0.124271	0.169441	0.113211
510.158	458.296	2225.29	1766.99	1320.08	1473.27	1458.11	1458.11	1151.8	1282.55	1188.82	1239.72			863.61	1016.8	1001.63	1001.63	695.329	826.074	732.348	783.246			0.488746	0.575442	0.566859	0.566859	0.39351	0.467503	0.414461	0.443266			0.051237	0.0409737	0.0484926	0.0484926	0.0690299	0.0476301	0.0412552	0.0352418			0.0957472	0.076733	0.128151	0.128151	0.180193	0.117469
515.16	457.094	2227.74	1770.64	1314.8	1474.88	1460.06	1460.06	1153.65	1281.39	1187.4	1240.55			858.327	1018.41	1003.58	1003.58	697.181	824.918	730.93	784.08			0.484755	0.575163	0.56679	0.56679	0.393745	0.465886	0.412805	0.442822			0.0472453	0.0406937	0.0484229	0.0484229	0.0692641	0.0460129	0.0395995	0.0347985			0.0882877	0.0762088	0.127967	0.127967	0.180805	0.113481
520.161	457.798	2226.39	1768.59	1321.31	1475.11	1460.38	1460.38	1154.08	1284.34	1191.71	1240.69			864.839	1018.64	1003.91	1003.91	697.602	827.867	735.237	784.216			0.488999	0.575959	0.567632	0.567632	0.394439	0.468094	0.415719	0.443413			0.0514891	0.0414904	0.0492648	0.0492648	0.0699586	0.0482203	0.0425132	0.0353887			0.0962183	0.0777008	0.130192	0.130192	0.182617	0.118925
525.163	456.013	2225.31	1769.3	1325.49	1475.47	1461.04	1461.04	1153.37	1285.78	1192.39	1243.83			869.021	1019	1004.57	1004.57	696.896	829.307	735.915	787.353			0.491167	0.575933	0.567776	0.567776	0.393883	0.468721	0.415936	0.445008			0.0536575	0.0414639	0.0494094	0.0494094	0.069402	0.0488473	0.0427304	0.0369846			0.10027	0.0776511	0.130574	0.130574	0.181164	0.120471
530.165	459.355	2227.91	1768.56	1325.15	1478.19	1464.95	1464.95	1155.18	1287.47	1194.22	1243.73			868.682	1021.71	1008.48	1008.48	698.712	830.996	737.752	787.26			0.49118	0.57771	0.570227	0.570227	0.395074	0.469872	0.417148	0.445142			0.053671	0.0432408	0.0518597	0.0518597	0.0705934	0.0499981	0.0439429	0.037118			0.100296	0.0809788	0.13705	0.13705	0.184274	0.12331
535.166	457.652	2225.6	1767.95	1319.14	1476.73	1464.41	1464.41	1156.53	1284.02	1195.63	1246.14			862.665	1020.26	1007.94	1007.94	700.059	827.549	739.158	789.663			0.487947	0.577087	0.57012	0.57012	0.395973	0.468085	0.418088	0.446655			0.0504379	0.042618	0.051753	0.051753	0.0714922	0.0482112	0.0448827	0.0386314			0.0942538	0.0798125	0.136768	0.136768	0.186621	0.118902
540.168	458.58	2227.94	1769.36	1325.71	1480.21	1462.45	1462.45	1156.93	1287.37	1196.99	1244.93			869.234	1023.73	1005.98	1005.98	700.454	830.901	740.513	788.462			0.491271	0.578591	0.568556	0.568556	0.395881	0.469606	0.418521	0.445621			0.0537619	0.0441219	0.050189	0.050189	0.0714001	0.0497329	0.0453156	0.0375969			0.100465	0.0826288	0.132635	0.132635	0.18638	0.122655
545.169	456.241	2222.74	1766.5	1319.08	1479.09	1461.76	1461.76	1155.94	1287.82	1195.78	1244.81			862.602	1022.61	1005.29	1005.29	699.468	831.342	739.306	788.341			0.48831	0.578892	0.569083	0.569083	0.395962	0.470614	0.418514	0.446272			0.0508008	0.0444232	0.0507158	0.0507158	0.0714812	0.0507408	0.0453081	0.038248			0.0949321	0.0831931	0.134027	0.134027	0.186592	0.125141
550.171	458.739	2223.28	1764.54	1323.45	1479.72	1463.03	1463.03	1154.85	1289.03	1199.36	1244.72			866.974	1023.25	1006.56	1006.56	698.379	832.559	742.889	788.252			0.491331	0.579894	0.570437	0.570437	0.395785	0.471827	0.421009	0.446718			0.0538214	0.0454255	0.0520699	0.0520699	0.0713042	0.0519537	0.0478039	0.0386937			0.100577	0.0850701	0.137605	0.137605	0.18613	0.128133
555.172	458.603	2224.19	1765.59	1324.93	1479.98	1464.49	1464.49	1154.33	1288.16	1196.11	1243.57			868.456	1023.51	1008.02	1008.02	697.855	831.692	739.636	787.1			0.491879	0.5797	0.570924	0.570924	0.395254	0.471057	0.418918	0.445801			0.05437	0.0452313	0.052557	0.052557	0.0707732	0.0511834	0.0457123	0.0377768			0.101602	0.0847065	0.138893	0.138893	0.184744	0.126233
560.174	457.614	2220.28	1762.67	1320.07	1478.88	1464.88	1464.88	1158.49	1291.78	1201.2	1246.57			863.601	1022.4	1008.4	1008.4	702.021	835.311	744.729	790.094			0.489939	0.58003	0.572089	0.572089	0.398271	0.473889	0.4225	0.448237			0.0524295	0.0455613	0.0537218	0.0537218	0.0737906	0.054016	0.0492948	0.040213			0.0979756	0.0853244	0.141971	0.141971	0.19262	0.133219
565.175	457.714	2224.91	1767.2	1327.25	1481.1	1466.16	1466.16	1157.49	1293.76	1199.36	1247.13			870.773	1024.63	1009.68	1009.68	701.016	837.288	742.884	790.659			0.492742	0.579804	0.571348	0.571348	0.396682	0.473794	0.420374	0.447408			0.0552324	0.0453351	0.0529806	0.0529806	0.0722013	0.0539203	0.0471681	0.0393841			0.103213	0.0849008	0.140012	0.140012	0.188472	0.132983
570.177	456.468	2226.44	1769.97	1327.8	1483.49	1469.68	1469.68	1162.97	1294.15	1202.2	1248.98			871.324	1027.01	1013.2	1013.2	706.498	837.679	745.728	792.507			0.492281	0.580242	0.57244	0.57244	0.399157	0.473272	0.421321	0.447751			0.0547712	0.0457735	0.054073	0.054073	0.0746766	0.0533984	0.0481158	0.0397267			0.102352	0.0857219	0.142899	0.142899	0.194933	0.131696
575.179	456.33	2221.14	1764.81	1325.67	1480.65	1467.37	1467.37	1160.23	1296.15	1199.15	1249.67			869.201	1024.18	1010.9	1010.9	703.76	839.682	742.678	793.195			0.492517	0.580331	0.572809	0.572809	0.398773	0.475791	0.420825	0.44945			0.0550079	0.0458623	0.0544421	0.0544421	0.0742925	0.0559174	0.0476197	0.0414259			0.102794	0.0858881	0.143874	0.143874	0.19393	0.137908
580.18	455.872	2221.49	1765.62	1329.85	1482.94	1468.33	1468.33	1159.84	1294.35	1201.2	1250.91			873.378	1026.47	1011.85	1011.85	703.364	837.878	744.73	794.433			0.494659	0.581367	0.573088	0.573088	0.398367	0.474553	0.421796	0.449947			0.0571496	0.0468982	0.0547213	0.0547213	0.0738868	0.0546792	0.0485905	0.0419227			0.106796	0.0878281	0.144612	0.144612	0.192871	0.134854
585.182	455.182	2221.54	1766.36	1326.9	1483.84	1469.16	1469.16	1166.28	1294.48	1201.85	1251.45			870.427	1027.36	1012.68	1012.68	709.808	838.012	745.379	794.974			0.492781	0.581629	0.573318	0.573318	0.401848	0.474429	0.421986	0.450064			0.0552714	0.0471604	0.0549513	0.0549513	0.0773678	0.054556	0.0487809	0.0420402			0.103286	0.0883191	0.14522	0.14522	0.201958	0.13455
590.183	457.505	2220.78	1763.27	1335.58	1485.1	1467.17	1467.17	1158.22	1294.96	1202.52	1251.32			879.108	1028.63	1010.7	1010.7	701.747	838.491	746.043	794.844			0.498567	0.583365	0.573194	0.573194	0.39798	0.475532	0.423102	0.450778			0.0610572	0.0488965	0.0548269	0.0548269	0.0734997	0.0556581	0.0498962	0.0427543			0.114098	0.0915704	0.144891	0.144891	0.191861	0.137269
595.185	456.656	2217.95	1761.3	1331.73	1484.54	1469.75	1469.75	1162.3	1298.59	1200.67	1252.16			875.261	1028.07	1013.28	1013.28	705.829	842.115	744.194	795.691			0.496942	0.583699	0.575304	0.575304	0.400744	0.478122	0.422526	0.451765			0.0594321	0.0492305	0.0569374	0.0569374	0.0762636	0.058249	0.0493209	0.0437407			0.111061	0.0921959	0.150469	0.150469	0.199076	0.143658
600.186	458.22	2221.08	1762.86	1340.7	1485.93	1470.93	1470.93	1161.42	1297.2	1204.44	1253.49			884.226	1029.46	1014.46	1014.46	704.947	840.73	747.972	797.014			0.501586	0.58397	0.575461	0.575461	0.399888	0.476912	0.424294	0.452114			0.0640764	0.0495012	0.0570942	0.0570942	0.0754074	0.0570388	0.0510888	0.04409			0.11974	0.092703	0.150883	0.150883	0.196841	0.140674
605.188	454.777	2218.73	1763.96	1332.72	1485.64	1468.43	1468.43	1165.34	1296.83	1199.01	1251.81			876.248	1029.17	1011.96	1011.96	708.864	840.36	742.532	795.333			0.496751	0.583444	0.573686	0.573686	0.40186	0.476406	0.420947	0.45088			0.059242	0.0489753	0.0553189	0.0553189	0.0773796	0.0565328	0.0477413	0.0428563			0.110706	0.0917179	0.146192	0.146192	0.201989	0.139426
610.189	457.481	2220.64	1763.15	1330.73	1486.99	1469.62	1469.62	1165.17	1297.7	1201.65	1253.88			874.261	1030.52	1013.15	1013.15	708.699	841.225	745.175	797.402			0.49585	0.584476	0.574623	0.574623	0.401949	0.477114	0.422637	0.452259			0.058341	0.0500069	0.0562565	0.0562565	0.0774689	0.0572401	0.0494318	0.0442348			0.109023	0.0936499	0.148669	0.148669	0.202222	0.14117
615.191	456.792	2219.51	1762.72	1335.37	1486.94	1470.85	1470.85	1164.33	1295.92	1205.97	1252.67			878.895	1030.46	1014.38	1014.38	707.859	839.447	749.498	796.201			0.498602	0.584588	0.575463	0.575463	0.401573	0.476223	0.425195	0.45169			0.0610931	0.0501192	0.0570965	0.0570965	0.0770921	0.0563499	0.0519892	0.0436658			0.114165	0.0938602	0.150889	0.150889	0.201238	0.138975
620.193	455.784	2219.39	1763.61	1331.37	1488.12	1472.4	1472.4	1165.21	1297.63	1203.43	1253.92			874.9	1031.65	1015.93	1015.93	708.738	841.156	746.956	797.445			0.496085	0.584965	0.576053	0.576053	0.401868	0.476952	0.423539	0.452167			0.0585761	0.0504959	0.0576864	0.0576864	0.0773878	0.0570785	0.0503332	0.0441431			0.109462	0.0945656	0.152448	0.152448	0.20201	0.140772
625.194	456.614	2217.96	1761.35	1336.3	1489.26	1473.19	1473.19	1164.41	1297.88	1207.97	1254.39			879.826	1032.79	1016.72	1016.72	707.936	841.404	751.498	797.918			0.499519	0.586362	0.577238	0.577238	0.401929	0.477705	0.426661	0.453016			0.0620095	0.0518928	0.0588709	0.0588709	0.0774482	0.0578315	0.0534555	0.044992			0.115878	0.0971817	0.155578	0.155578	0.202168	0.142629
630.196	456.216	2215.55	1759.34	1329.28	1488.98	1472.59	1472.59	1166.31	1297.9	1207.22	1251.72			872.811	1032.51	1016.11	1016.11	709.839	841.428	750.747	795.245			0.496102	0.586875	0.577556	0.577556	0.40347	0.478264	0.426722	0.452014			0.0585931	0.0524066	0.059189	0.059189	0.0789892	0.0583911	0.0535162	0.0439904			0.109494	0.0981439	0.156419	0.156419	0.206191	0.144009
635.197	456.592	2219.98	1763.38	1330.57	1491.79	1475.65	1475.65	1171.61	1300.77	1211.19	1254.42			874.1	1035.32	1019.18	1019.18	715.138	844.298	754.721	797.944			0.495694	0.58712	0.577967	0.577967	0.405548	0.478794	0.427996	0.452507			0.058185	0.0526509	0.0595999	0.0595999	0.0810679	0.0589205	0.0547901	0.0444831			0.108731	0.0986014	0.157505	0.157505	0.211617	0.145315
640.199	456.139	2218.64	1762.5	1332.04	1492.79	1475.36	1475.36	1164.92	1302.01	1211.85	1254.39			875.562	1036.32	1018.89	1018.89	708.443	845.532	755.381	797.918			0.496774	0.587982	0.578094	0.578094	0.401954	0.479735	0.428586	0.45272			0.0592644	0.0535137	0.0597268	0.0597268	0.0774737	0.059862	0.0553803	0.0446965			0.110748	0.100217	0.15784	0.15784	0.202235	0.147637
645.2	455.971	2217.85	1761.88	1335.94	1491.95	1475.24	1475.24	1166.04	1301.78	1212.77	1255.38			879.47	1035.48	1018.77	1018.77	709.569	845.302	756.293	798.904			0.499166	0.587715	0.57823	0.57823	0.402734	0.479773	0.429254	0.453439			0.0616567	0.053246	0.0598631	0.0598631	0.0782538	0.0598997	0.0560483	0.0454149			0.115219	0.0997159	0.1582	0.1582	0.204271	0.14773
650.202	456.607	2216.41	1759.81	1329.84	1491.11	1475.29	1475.29	1168.43	1304.44	1211.15	1255.15			873.37	1034.64	1018.82	1018.82	711.959	847.969	754.675	798.675			0.496287	0.587926	0.578937	0.578937	0.404566	0.481853	0.428839	0.453842			0.0587778	0.0534574	0.0605697	0.0605697	0.0800858	0.0619798	0.055634	0.0458184			0.109839	0.100112	0.160068	0.160068	0.209053	0.15286
655.203	454.293	2217.11	1762.82	1333.53	1494.1	1476.29	1476.29	1174.52	1305.24	1215.44	1255.16			877.061	1037.62	1019.81	1019.81	718.05	848.767	758.968	798.687			0.497533	0.588617	0.578513	0.578513	0.407331	0.481483	0.430542	0.453074			0.060024	0.0541483	0.0601465	0.0601465	0.0828501	0.0616095	0.0573368	0.04505			0.112168	0.101406	0.158949	0.158949	0.216269	0.151946
660.205	456.02	2213.42	1757.4	1332.99	1492.18	1476.35	1476.35	1168.7	1305.95	1210.3	1252.72			876.518	1035.71	1019.87	1019.87	712.224	849.478	753.829	796.248			0.498758	0.589341	0.58033	0.58033	0.405271	0.483371	0.428945	0.453082			0.0612483	0.0548726	0.0619634	0.0619634	0.0807903	0.0634979	0.0557394	0.0450584			0.114455	0.102762	0.163751	0.163751	0.210892	0.156604
665.207	454.969	2213.02	1758.05	1335.95	1492.53	1475.85	1475.85	1173.33	1305.48	1213.89	1254.55			879.482	1036.06	1019.37	1019.37	716.855	849.003	757.413	798.079			0.50026	0.589323	0.579831	0.579831	0.407756	0.482923	0.430826	0.453957			0.0627507	0.0548542	0.0614643	0.0614643	0.0832753	0.0630498	0.0576202	0.0459332			0.117263	0.102728	0.162432	0.162432	0.217379	0.155499
670.208	455.92	2217.15	1761.23	1336.27	1495.54	1478.38	1478.38	1174.3	1306.18	1212.77	1254.24			879.796	1039.07	1021.91	1021.91	717.823	849.703	756.293	797.764			0.499536	0.589967	0.580226	0.580226	0.40757	0.48245	0.429413	0.452959			0.0620266	0.0554985	0.0618594	0.0618594	0.0830894	0.0625761	0.0562071	0.0449355			0.11591	0.103934	0.163476	0.163476	0.216893	0.15433
675.21	456.459	2216.7	1760.24	1339.71	1496.28	1478.18	1478.18	1175.24	1306.65	1212.92	1253.63			883.241	1039.8	1021.71	1021.71	718.769	850.173	756.445	797.159			0.501772	0.590716	0.580436	0.580436	0.408335	0.482986	0.429739	0.452868			0.0642624	0.0562475	0.0620689	0.0620689	0.0838542	0.0631123	0.0565331	0.0448445			0.120088	0.105337	0.16403	0.16403	0.21889	0.155653
680.211	455.742	2213.11	1757.37	1334.49	1496.24	1477	1477	1170.47	1308.52	1214.36	1255.4			878.02	1039.77	1020.53	1020.53	713.997	852.046	757.882	798.927			0.499621	0.59166	0.580711	0.580711	0.406287	0.484841	0.431259	0.454615			0.0621117	0.0571914	0.0623445	0.0623445	0.0818062	0.0649676	0.0580532	0.0465908			0.116069	0.107105	0.164758	0.164758	0.213544	0.160228
685.213	457.124	2210.52	1753.4	1335.52	1496.9	1478.34	1478.34	1172.39	1308.29	1213.89	1256.22			879.046	1040.43	1021.86	1021.86	715.913	851.815	757.422	799.748			0.501339	0.593379	0.582791	0.582791	0.408301	0.485809	0.431974	0.456114			0.0638299	0.0589102	0.0644246	0.0644246	0.0838203	0.0659354	0.0587689	0.04809			0.11928	0.110323	0.170255	0.170255	0.218801	0.162615
690.214	455.237	2214.51	1759.28	1342.58	1498.77	1481.1	1481.1	1177.71	1311.65	1220.08	1260.04			886.105	1042.3	1024.62	1024.62	721.238	855.175	763.602	803.568			0.503676	0.592459	0.582411	0.582411	0.409963	0.486095	0.434043	0.45676			0.0661663	0.0579905	0.0640445	0.0640445	0.0854821	0.0662211	0.0608375	0.0487365			0.123646	0.108601	0.169251	0.169251	0.223139	0.16332
695.216	455.317	2213.72	1758.41	1336.49	1498.2	1481.56	1481.56	1175.38	1310.67	1217.55	1260.79			880.02	1041.73	1025.08	1025.08	718.904	854.195	761.073	804.319			0.500465	0.592428	0.582962	0.582962	0.408838	0.485778	0.43282	0.457414			0.0629553	0.0579593	0.0645952	0.0645952	0.0843579	0.0659046	0.0596143	0.0493898			0.117645	0.108543	0.170706	0.170706	0.220205	0.162539
700.217	456.027	2211.6	1755.57	1341.01	1498.74	1481.39	1481.39	1176.97	1309.26	1217.27	1260.43			884.535	1042.27	1024.92	1024.92	720.495	852.786	760.794	803.953			0.503844	0.593692	0.583808	0.583808	0.410405	0.48576	0.43336	0.457944			0.066335	0.0592227	0.0654412	0.0654412	0.0859242	0.0658863	0.0601542	0.0499198			0.123961	0.110909	0.172942	0.172942	0.224293	0.162494
705.219	455.562	2212.65	1757.09	1342.54	1499.38	1482.83	1482.83	1178.24	1310.84	1218.51	1259.91			886.069	1042.91	1026.35	1026.35	721.771	854.367	762.035	803.433			0.504282	0.593542	0.584121	0.584121	0.410776	0.48624	0.433692	0.457252			0.0667729	0.059073	0.0657536	0.0657536	0.0862959	0.0663665	0.0604861	0.0492283			0.124779	0.110628	0.173767	0.173767	0.225264	0.163678
710.221	455.468	2211.34	1755.87	1341.88	1500.34	1481.85	1481.85	1175.36	1310.35	1220.57	1260.59			885.409	1043.87	1025.37	1025.37	718.883	853.874	764.093	804.116			0.504256	0.594503	0.583968	0.583968	0.409417	0.486296	0.435165	0.457958			0.0667468	0.0600338	0.0656013	0.0656013	0.0849361	0.066423	0.061959	0.0499345			0.12473	0.112428	0.173365	0.173365	0.221714	0.163818
715.222	455.772	2213.96	1758.19	1342.68	1501.61	1483.99	1483.99	1180.31	1311.25	1221.65	1263.17			886.207	1045.14	1027.52	1027.52	723.836	854.778	765.177	806.695			0.504045	0.594441	0.584419	0.584419	0.411694	0.48617	0.435208	0.458822			0.066536	0.0599725	0.0660521	0.0660521	0.0872136	0.0662962	0.062002	0.0507977			0.124337	0.112313	0.174556	0.174556	0.227659	0.163505
720.224	455.543	2212.18	1756.63	1343.3	1502.05	1483.35	1483.35	1179.99	1310.81	1223.97	1264.89			886.827	1045.57	1026.87	1026.87	723.518	854.332	767.502	808.421			0.504845	0.595214	0.584568	0.584568	0.411878	0.486346	0.436916	0.46021			0.0673353	0.0607454	0.0662013	0.0662013	0.0873971	0.0664728	0.0637109	0.0521866			0.12583	0.11376	0.17495	0.17495	0.228138	0.163941
725.225	454.572	2209.45	1754.88	1342.36	1501.23	1483.12	1483.12	1173.58	1310.83	1223.27	1263.42			885.888	1044.75	1026.64	1026.64	717.106	854.354	766.801	806.943			0.504813	0.595341	0.585022	0.585022	0.408635	0.486844	0.436953	0.459827			0.0673038	0.0608724	0.0666551	0.0666551	0.0841541	0.0669705	0.0637473	0.0518034			0.125771	0.113998	0.17615	0.17615	0.219673	0.165168
730.227	454.597	2212.97	1758.37	1339.57	1503.89	1484.88	1484.88	1177.87	1312.03	1224.64	1263.69			883.1	1047.42	1028.41	1028.41	721.4	855.555	768.164	807.22			0.502226	0.595675	0.584865	0.584865	0.410266	0.486561	0.436861	0.459073			0.0647169	0.0612065	0.0664984	0.0664984	0.0857856	0.0666878	0.0636557	0.0510488			0.120937	0.114624	0.175735	0.175735	0.223931	0.164471
735.228	453.901	2210.66	1756.76	1342.19	1503.8	1484.54	1484.54	1178.28	1312.67	1222.68	1264.27			885.715	1047.32	1028.07	1028.07	721.803	856.195	766.208	807.799			0.504176	0.596169	0.585207	0.585207	0.410872	0.487372	0.436149	0.459824			0.0666667	0.0617001	0.0668402	0.0668402	0.0863918	0.0674989	0.0629435	0.0518			0.124581	0.115548	0.176639	0.176639	0.225514	0.166471
740.23	453.938	2210.97	1757.03	1344.03	1503.91	1486.62	1486.62	1179.42	1314.14	1225.14	1265.12			887.558	1047.44	1030.14	1030.14	722.944	857.671	768.67	808.646			0.505145	0.596142	0.586298	0.586298	0.411457	0.488136	0.437481	0.460233			0.0676361	0.0616732	0.0679306	0.0679306	0.0869764	0.0682621	0.0642759	0.0522096			0.126392	0.115498	0.179521	0.179521	0.22704	0.168354
745.231	455.262	2208.41	1753.15	1345.29	1504.35	1484.96	1484.96	1182.23	1312.07	1225.66	1263.93			888.82	1047.88	1028.49	1028.49	725.759	855.592	769.184	807.454			0.506984	0.597712	0.586652	0.586652	0.413974	0.488031	0.438744	0.460573			0.0694748	0.0632434	0.0682846	0.0682846	0.0894934	0.0681574	0.0655381	0.052549			0.129828	0.118438	0.180456	0.180456	0.23361	0.168095
750.233	453.723	2209.45	1755.73	1354.61	1507.22	1487.55	1487.55	1183.05	1314.13	1225.11	1263.6			898.137	1050.75	1031.08	1031.08	726.578	857.653	768.635	807.123			0.511546	0.598469	0.587266	0.587266	0.413833	0.488488	0.437787	0.459708			0.074037	0.0640005	0.068899	0.068899	0.089352	0.0686147	0.0645812	0.0516843			0.138354	0.119856	0.18208	0.18208	0.233241	0.169223
755.234	454.205	2209.64	1755.44	1349.53	1507.69	1487.22	1487.22	1181.49	1311.61	1225.3	1265.27			893.058	1051.22	1030.75	1030.75	725.014	855.132	768.823	808.797			0.508738	0.598837	0.587176	0.587176	0.413011	0.487134	0.437967	0.460738			0.0712291	0.0643681	0.068809	0.068809	0.0885301	0.0672601	0.0647614	0.0527146			0.133107	0.120545	0.181842	0.181842	0.231096	0.165882
760.236	455.355	2209.12	1753.76	1357.41	1506.32	1485.47	1485.47	1181.32	1313.23	1225.65	1263.6			900.941	1049.85	1028.99	1028.99	724.85	856.753	769.177	807.122			0.513719	0.598626	0.586736	0.586736	0.413312	0.488523	0.438587	0.460224			0.07621	0.0641567	0.0683687	0.0683687	0.0888312	0.0686498	0.0653816	0.0521997			0.142414	0.120149	0.180678	0.180678	0.231882	0.16931
765.238	455.905	2207.11	1751.21	1354.59	1508.48	1488.94	1488.94	1179.69	1314.79	1223.6	1265.35			898.114	1052.01	1032.47	1032.47	723.216	858.318	767.13	808.875			0.512854	0.600732	0.589576	0.589576	0.412981	0.490129	0.438057	0.461895			0.0753443	0.0662631	0.0712092	0.0712092	0.0885004	0.0702554	0.0648519	0.0538714			0.140797	0.124094	0.188185	0.188185	0.231018	0.17327
770.239	454.328	2206.55	1752.22	1356.76	1507.8	1487.25	1487.25	1174.67	1313.83	1230.43	1266.85			900.283	1051.33	1030.78	1030.78	718.201	857.352	773.954	810.38			0.513797	0.599999	0.58827	0.58827	0.409881	0.489296	0.4417	0.462488			0.0762873	0.0655301	0.0699028	0.0699028	0.0854008	0.0694222	0.0684944	0.0544646			0.142559	0.122721	0.184732	0.184732	0.222927	0.171215
775.241	455.141	2208.32	1753.18	1350.77	1509.5	1488.69	1488.69	1182.15	1313.06	1230.56	1266.16			894.293	1053.03	1032.22	1032.22	725.678	856.587	774.09	809.685			0.510097	0.600637	0.588767	0.588767	0.41392	0.48859	0.441534	0.461837			0.0725874	0.0661679	0.0704005	0.0704005	0.0894397	0.0687161	0.0683285	0.0538132			0.135645	0.123915	0.186048	0.186048	0.23347	0.169473
780.242	454.578	2208.48	1753.9	1354.67	1509.86	1487.99	1487.99	1178.16	1315.12	1230.47	1268.11			898.201	1053.38	1031.51	1031.51	721.684	858.643	773.997	811.633			0.512117	0.600595	0.588126	0.588126	0.411474	0.489562	0.441301	0.462759			0.0746073	0.0661262	0.0697593	0.0697593	0.0869935	0.0696889	0.0680952	0.0547354			0.139419	0.123837	0.184353	0.184353	0.227085	0.171873
785.244	454.177	2207.46	1753.28	1355.14	1510.82	1489.2	1489.2	1179.81	1314.64	1232.51	1267.14			898.665	1054.35	1032.73	1032.73	723.332	858.167	776.039	810.672			0.512563	0.601359	0.589028	0.589028	0.41256	0.489464	0.442622	0.462375			0.0750532	0.0668903	0.0706609	0.0706609	0.0880791	0.0695907	0.0694161	0.054351			0.140253	0.125268	0.186736	0.186736	0.229918	0.17163
790.245	453.682	2208.97	1755.28	1350.52	1511.97	1491.16	1491.16	1180.3	1315.86	1233.79	1270.36			894.05	1055.49	1034.68	1034.68	723.822	859.385	777.313	813.882			0.509348	0.601323	0.589469	0.589469	0.412368	0.489599	0.442842	0.463675			0.0718385	0.0668546	0.0711019	0.0711019	0.087887	0.0697255	0.0696363	0.0556516			0.134245	0.125201	0.187901	0.187901	0.229417	0.171963
795.247	453.662	2208.07	1754.41	1348.07	1511.43	1491.2	1491.2	1179.06	1316.77	1232.05	1270.29			891.595	1054.96	1034.73	1034.73	722.588	860.299	775.579	813.819			0.508203	0.601318	0.589789	0.589789	0.41187	0.490365	0.442075	0.463871			0.0706937	0.0668489	0.0714221	0.0714221	0.0873896	0.0704911	0.0688692	0.0558474			0.132106	0.125191	0.188747	0.188747	0.228119	0.173851
800.248	453.119	2207.26	1754.14	1351.36	1511.64	1490.12	1490.12	1182.42	1314.2	1232.61	1269.76			894.882	1055.17	1033.64	1033.64	725.95	857.725	776.136	813.291			0.510156	0.601533	0.589262	0.589262	0.413851	0.488973	0.442461	0.463642			0.0726461	0.0670639	0.0708948	0.0708948	0.08937	0.0690996	0.0692551	0.0556182			0.135755	0.125593	0.187354	0.187354	0.233288	0.170419
805.25	451.398	2206.1	1754.7	1352.57	1511.38	1489.42	1489.42	1185	1313.38	1230.21	1268.86			896.097	1054.91	1032.95	1032.95	728.527	856.909	773.738	812.39			0.510683	0.60119	0.588676	0.588676	0.415185	0.48835	0.440951	0.462979			0.0731735	0.0667212	0.0703087	0.0703087	0.0907047	0.0684764	0.0677454	0.0549547			0.13674	0.124951	0.185805	0.185805	0.236772	0.168882
810.252	452.231	2205.57	1753.34	1349.62	1513.6	1490.76	1490.76	1181.73	1313.6	1233.48	1268.87			893.146	1057.13	1034.29	1034.29	725.257	857.122	777.012	812.397			0.509396	0.602922	0.589896	0.589896	0.413642	0.48885	0.44316	0.463341			0.0718863	0.0684528	0.0715292	0.0715292	0.0891615	0.0689764	0.0699544	0.0553175			0.134335	0.128194	0.189031	0.189031	0.232744	0.170115
815.253	450.563	2205.41	1754.84	1352.64	1513.01	1492.38	1492.38	1185.76	1312.29	1233.82	1269.77			896.164	1056.54	1035.91	1035.91	729.284	855.812	777.35	813.294			0.510681	0.60207	0.590315	0.590315	0.415584	0.487686	0.442974	0.463457			0.0731714	0.0676014	0.0719478	0.0719478	0.0911033	0.0678127	0.0697689	0.0554333			0.136736	0.1266	0.190137	0.190137	0.237813	0.167245
820.255	453.83	2206.05	1752.22	1361.38	1514.48	1493.5	1493.5	1185.72	1315.09	1239.37	1271.2			904.906	1058.01	1037.02	1037.02	729.251	858.615	782.897	814.727			0.516433	0.603809	0.591833	0.591833	0.416186	0.490015	0.446802	0.464968			0.0789238	0.0693403	0.0734665	0.0734665	0.0917056	0.0701413	0.0735967	0.0569438			0.147486	0.129856	0.19415	0.19415	0.239385	0.172988
825.256	452.237	2206.92	1754.69	1356.17	1515.15	1493.53	1493.53	1183.05	1314.93	1240.31	1271.88			899.693	1058.68	1037.05	1037.05	726.572	858.453	783.833	815.409			0.512738	0.603342	0.591019	0.591019	0.414075	0.489235	0.446709	0.464704			0.0752282	0.0688737	0.072652	0.072652	0.0895949	0.0693614	0.0735031	0.05668			0.14058	0.128983	0.191998	0.191998	0.233875	0.171065
830.258	452.96	2206.02	1753.06	1360.12	1516.48	1496.49	1496.49	1181.85	1315.5	1242.51	1273.11			903.642	1060.01	1040.02	1040.02	725.378	859.023	786.038	816.632			0.515465	0.60466	0.593257	0.593257	0.413778	0.490013	0.44838	0.465832			0.0779558	0.0701912	0.0748902	0.0748902	0.0892973	0.0701397	0.0751747	0.0578081			0.145677	0.13145	0.197913	0.197913	0.233098	0.172984
835.259	453.374	2204.41	1751.04	1362.9	1515.62	1493.46	1493.46	1188.24	1316.05	1239.25	1271.59			906.425	1059.15	1036.99	1036.99	731.77	859.574	782.774	815.121			0.517651	0.604869	0.592215	0.592215	0.417907	0.490895	0.447035	0.465508			0.0801413	0.0704	0.0738476	0.0738476	0.0934263	0.0710211	0.0738292	0.057484			0.149761	0.131841	0.195157	0.195157	0.243877	0.175158
840.261	453.405	2205.32	1751.91	1360.29	1516.56	1496.97	1496.97	1188.2	1314.05	1240.92	1276.77			903.813	1060.09	1040.5	1040.5	731.723	857.577	784.444	820.301			0.515901	0.605102	0.593923	0.593923	0.417671	0.489509	0.447765	0.468232			0.0783916	0.0706336	0.0755556	0.0755556	0.0931906	0.0696358	0.074559	0.060208			0.146491	0.132278	0.199671	0.199671	0.243261	0.171741
845.262	453.948	2203.93	1749.98	1359.5	1514.37	1495.03	1495.03	1185.06	1316.05	1239.84	1273.99			903.028	1057.89	1038.55	1038.55	728.584	859.579	783.368	817.521			0.516022	0.604517	0.593466	0.593466	0.416339	0.491194	0.447644	0.46716			0.0785127	0.0700481	0.075099	0.075099	0.0918581	0.0713204	0.0744386	0.0591365			0.146718	0.131182	0.198464	0.198464	0.239783	0.175896
850.264	453.007	2202.58	1749.57	1359.21	1514.44	1496.08	1496.08	1183.15	1315.19	1240.22	1272.65			902.74	1057.97	1039.61	1039.61	726.673	858.721	783.744	816.18			0.515978	0.604704	0.594208	0.594208	0.415343	0.490818	0.447963	0.466503			0.0784685	0.0702348	0.0758415	0.0758415	0.0908629	0.0709445	0.074758	0.058479			0.146635	0.131532	0.200427	0.200427	0.237185	0.174969
855.266	451.76	2198.88	1747.12	1358.92	1514.61	1494.3	1494.3	1183.84	1310.69	1241.49	1272.27			902.448	1058.13	1037.82	1037.82	727.37	854.215	785.018	815.798			0.516534	0.605645	0.594019	0.594019	0.416325	0.488927	0.449321	0.466938			0.0790249	0.0711761	0.0756525	0.0756525	0.0918443	0.0690537	0.0761153	0.0589145			0.147675	0.133294	0.199927	0.199927	0.239747	0.170306
860.267	450.502	2200.74	1750.24	1363.48	1515.9	1495.23	1495.23	1187.51	1316.88	1241.37	1273.35			907.003	1059.42	1038.76	1038.76	731.035	860.408	784.9	816.873			0.518217	0.605303	0.593495	0.593495	0.417678	0.491595	0.448454	0.466721			0.080708	0.0708339	0.0751282	0.0751282	0.0931972	0.0717218	0.0752481	0.0586976			0.15082	0.132654	0.198542	0.198542	0.243279	0.176886
865.269	453.711	2202.56	1748.85	1365.63	1517.13	1497.92	1497.92	1185.52	1317.92	1241.91	1273.01			909.161	1060.66	1041.45	1041.45	729.047	861.452	785.44	816.536			0.519862	0.606489	0.595505	0.595505	0.416872	0.492582	0.449118	0.466899			0.0823531	0.0720198	0.0771384	0.0771384	0.0923919	0.0727088	0.0759127	0.0588752			0.153894	0.134874	0.203854	0.203854	0.241176	0.17932
870.27	451.574	2201.19	1749.62	1357.71	1517.92	1497.02	1497.02	1193.23	1316.33	1242.62	1273.9			901.238	1061.44	1040.55	1040.55	736.759	859.858	786.152	817.432			0.515105	0.606671	0.594729	0.594729	0.421097	0.491454	0.449327	0.467205			0.0775956	0.0722024	0.0763616	0.0763616	0.096616	0.0715807	0.0761217	0.0591816			0.145004	0.135216	0.201801	0.201801	0.252203	0.176538
875.272	452.545	2200.65	1748.11	1360.43	1517.06	1499.23	1499.23	1188.54	1317.06	1249.62	1273.95			903.959	1060.58	1042.76	1042.76	732.069	860.587	793.145	817.479			0.517107	0.606703	0.596508	0.596508	0.418778	0.492296	0.453716	0.467636			0.0795975	0.0722338	0.0781412	0.0781412	0.0942972	0.0724226	0.0805106	0.0596124			0.148745	0.135275	0.206504	0.206504	0.24615	0.178615
880.273	451.841	2198.61	1746.77	1357.83	1517.4	1498.38	1498.38	1190.08	1315.83	1247.21	1276.04			901.358	1060.93	1041.9	1041.9	733.608	859.355	790.742	819.564			0.516015	0.607366	0.596475	0.596475	0.41998	0.491969	0.452689	0.469189			0.0785053	0.0728975	0.0781084	0.0781084	0.0954996	0.0720951	0.0794831	0.0611649			0.146704	0.136518	0.206417	0.206417	0.249289	0.177807
885.275	452.136	2199.03	1746.9	1364.92	1517.35	1497.63	1497.63	1188.88	1316.95	1249.49	1276.22			908.443	1060.88	1041.16	1041.16	732.411	860.475	793.02	819.748			0.520032	0.607291	0.596004	0.596004	0.419264	0.492573	0.453959	0.469259			0.0825228	0.0728227	0.0776371	0.0776371	0.0947833	0.0726998	0.0807535	0.0612355			0.154211	0.136378	0.205172	0.205172	0.247419	0.179298
890.276	452.147	2196.84	1744.7	1360	1518.47	1498.15	1498.15	1185.67	1320.14	1248.61	1273.97			903.531	1061.99	1041.68	1041.68	729.196	863.67	792.136	817.498			0.517873	0.608698	0.597054	0.597054	0.41795	0.495026	0.454025	0.468562			0.0803638	0.0742295	0.0786869	0.0786869	0.0934698	0.0751528	0.0808199	0.0605382			0.150177	0.139013	0.207946	0.207946	0.24399	0.185348
895.278	453.278	2194.19	1740.91	1363.07	1518.62	1496.97	1496.97	1185.24	1319.95	1248.69	1272.74			906.6	1062.15	1040.5	1040.5	728.763	863.48	792.221	816.265			0.520761	0.610109	0.597676	0.597676	0.41861	0.495993	0.455061	0.468872			0.0832518	0.0756398	0.0793091	0.0793091	0.094129	0.0761191	0.0818551	0.0608479			0.155574	0.141654	0.20959	0.20959	0.245711	0.187731
900.28	452.692	2196.59	1743.89	1357.25	1518.79	1499.07	1499.07	1190.64	1322.01	1247.27	1276.68			900.776	1062.32	1042.59	1042.59	734.171	865.532	790.8	820.212			0.516531	0.609166	0.597855	0.597855	0.420995	0.496321	0.453468	0.470334			0.079022	0.0746973	0.0794877	0.0794877	0.0965146	0.076448	0.0802624	0.0623098			0.147669	0.139889	0.210062	0.210062	0.251938	0.188542
905.281	450.9	2195.08	1744.18	1360.33	1520.41	1498.68	1498.68	1194.55	1323.04	1244.15	1278.94			903.861	1063.94	1042.21	1042.21	738.08	866.569	787.681	822.464			0.518216	0.609995	0.597536	0.597536	0.423168	0.496835	0.451606	0.471548			0.0807064	0.0755265	0.0791692	0.0791692	0.098687	0.0769615	0.0784001	0.0635241			0.150817	0.141442	0.209221	0.209221	0.257609	0.189809
910.283	452.04	2193.14	1741.1	1361.54	1520.04	1498.21	1498.21	1186.2	1321.66	1247.95	1277.6			905.067	1063.57	1041.74	1041.74	729.732	865.185	791.48	821.124			0.519823	0.610857	0.598321	0.598321	0.41912	0.496917	0.454585	0.471611			0.082314	0.0763882	0.0799544	0.0799544	0.0946395	0.0770438	0.0813794	0.0635871			0.153821	0.143055	0.211296	0.211296	0.247044	0.190012
915.284	453.097	2194.99	1741.89	1369.48	1521.37	1500.37	1500.37	1190.59	1319.53	1249.79	1277.1			913.005	1064.9	1043.9	1043.9	734.119	863.061	793.32	820.627			0.524147	0.611346	0.599293	0.599293	0.42145	0.495474	0.455437	0.471113			0.0866372	0.0768774	0.0809257	0.0809257	0.0969694	0.0756008	0.0822311	0.0630895			0.1619	0.143971	0.213863	0.213863	0.253125	0.186453
920.286	451.18	2196.42	1745.24	1369.54	1521.31	1500.38	1500.38	1187.76	1320.35	1250.25	1278.61			913.071	1064.84	1043.91	1043.91	731.288	863.879	793.773	822.133			0.523178	0.610139	0.598145	0.598145	0.419018	0.494991	0.454822	0.471071			0.0856684	0.0756701	0.0797782	0.0797782	0.0945379	0.0751179	0.081616	0.0630476			0.160089	0.14171	0.21083	0.21083	0.246778	0.185262
925.287	452.657	2195.09	1742.44	1366.87	1521.76	1502.56	1502.56	1190.29	1320.83	1251.24	1275.86			910.397	1065.29	1046.08	1046.08	733.817	864.36	794.772	819.389			0.522485	0.611377	0.600356	0.600356	0.421144	0.496064	0.456126	0.470254			0.0849752	0.0769079	0.081989	0.081989	0.0966632	0.0761901	0.0829208	0.0622304			0.158794	0.144028	0.216673	0.216673	0.252326	0.187906
930.289	451.72	2197.99	1746.27	1363.85	1523.82	1503.41	1503.41	1191.9	1321.95	1250.17	1277.66			907.375	1067.34	1046.94	1046.94	735.429	865.481	793.695	821.186			0.519607	0.611212	0.599526	0.599526	0.421142	0.495616	0.454508	0.470251			0.0820972	0.0767432	0.0811596	0.0811596	0.0966615	0.0757426	0.0813024	0.0622268			0.153416	0.14372	0.214481	0.214481	0.252321	0.186803
935.29	454.303	2197.68	1743.38	1370.01	1526.13	1503.7	1503.7	1195.28	1323.34	1251.95	1279.55			913.539	1069.65	1047.23	1047.23	738.81	866.866	795.477	823.081			0.524005	0.613552	0.600691	0.600691	0.423781	0.497233	0.456285	0.472118			0.0864956	0.0790836	0.0823242	0.0823242	0.0993	0.0773599	0.0830792	0.0640945			0.161635	0.148103	0.217558	0.217558	0.259209	0.190791
940.292	454.515	2194.17	1739.66	1371.91	1524.88	1503.04	1503.04	1191.19	1323.2	1253.87	1279.36			915.434	1068.41	1046.57	1046.57	734.72	866.725	797.392	822.887			0.526215	0.614149	0.601594	0.601594	0.422336	0.498216	0.458361	0.473017			0.0887057	0.0796803	0.0832268	0.0832268	0.0978554	0.0783424	0.0851559	0.0649928			0.165765	0.14922	0.219944	0.219944	0.255438	0.193215
945.294	452.456	2196.46	1744.01	1377.15	1526.68	1504.77	1504.77	1192.21	1324.31	1253.39	1281.09			920.676	1070.2	1048.3	1048.3	735.739	867.836	796.918	824.613			0.527908	0.613646	0.601087	0.601087	0.421867	0.49761	0.456946	0.472826			0.0903987	0.0791774	0.0827203	0.0827203	0.0973861	0.0777366	0.0837407	0.0648024			0.168929	0.148279	0.218605	0.218605	0.254213	0.19172
950.295	454.186	2192.2	1738.01	1374.37	1524.15	1503.1	1503.1	1186.47	1321.96	1252.31	1278.8			917.901	1067.68	1046.62	1046.62	730.002	865.491	795.832	822.322			0.528133	0.614311	0.602195	0.602195	0.420021	0.497978	0.457898	0.47314			0.0906236	0.0798426	0.0838283	0.0838283	0.0955409	0.0781044	0.0846926	0.0651158			0.169349	0.149524	0.221533	0.221533	0.249396	0.192627
955.297	452.834	2194.47	1741.63	1360.25	1526.65	1505.03	1505.03	1191.68	1324	1255.33	1281.17			903.778	1070.17	1048.56	1048.56	735.205	867.524	798.854	824.694			0.518925	0.614465	0.602055	0.602055	0.422135	0.498109	0.458681	0.473517			0.0814157	0.0799964	0.0836881	0.0836881	0.0976544	0.0782356	0.085475	0.0654933			0.152142	0.149812	0.221163	0.221163	0.254913	0.192951
960.298	451.575	2194.5	1742.92	1364.28	1528.04	1507.05	1507.05	1189.57	1323.26	1255.04	1279.09			907.803	1071.57	1050.58	1050.58	733.095	866.789	798.565	822.619			0.520851	0.614812	0.602768	0.602768	0.420613	0.497319	0.458176	0.471977			0.0833418	0.0803436	0.0844007	0.0844007	0.0961321	0.077446	0.0849705	0.0639531			0.155742	0.150463	0.223046	0.223046	0.25094	0.191004
965.3	451.567	2191.49	1739.93	1375.75	1526.35	1505.87	1505.87	1192.21	1322.51	1255.33	1280.63			919.28	1069.87	1049.39	1049.39	735.738	866.034	798.855	824.157			0.528344	0.614895	0.603126	0.603126	0.422856	0.497742	0.459132	0.473674			0.0908349	0.0804264	0.0847587	0.0847587	0.0983753	0.0778684	0.0859261	0.0656497			0.169744	0.150618	0.223992	0.223992	0.256795	0.192046
970.301	452.268	2193.89	1741.62	1373.28	1528.7	1505.3	1505.3	1189.94	1325.29	1255.98	1281.32			916.81	1072.23	1048.83	1048.83	733.47	868.816	799.507	824.85			0.526413	0.615649	0.602215	0.602215	0.421143	0.498856	0.45906	0.473611			0.0889035	0.0811807	0.0838485	0.0838485	0.0966624	0.0789823	0.0858544	0.0655875			0.166135	0.15203	0.221587	0.221587	0.252324	0.194793
975.303	450.648	2193.85	1743.2	1374.12	1529.52	1506	1506	1188.93	1326.42	1256.08	1281.9			917.649	1073.04	1049.53	1049.53	732.46	869.946	799.607	825.432			0.526416	0.61556	0.60207	0.60207	0.420181	0.499051	0.4587	0.473515			0.0889068	0.0810915	0.0837032	0.0837032	0.0957005	0.0791775	0.085495	0.0654913			0.166141	0.151863	0.221203	0.221203	0.249813	0.195274
980.304	451.615	2188.18	1736.57	1374.27	1528.66	1503.72	1503.72	1194.47	1325.32	1255.98	1281.57			917.801	1072.19	1047.24	1047.24	738.002	868.846	799.505	825.092			0.528514	0.617418	0.603054	0.603054	0.424977	0.500324	0.460394	0.475128			0.091005	0.0829497	0.084687	0.084687	0.100497	0.0804503	0.0871883	0.0671042			0.170062	0.155343	0.223803	0.223803	0.262333	0.198413
985.306	450.759	2188.39	1737.63	1371.42	1528.68	1506.07	1506.07	1194.06	1326.53	1257.63	1278.82			914.947	1072.2	1049.6	1049.6	737.587	870.054	801.154	822.351			0.526549	0.61705	0.60404	0.60404	0.424479	0.500713	0.461062	0.473261			0.0890399	0.0825814	0.085673	0.085673	0.0999985	0.08084	0.0878562	0.0652367			0.16639	0.154654	0.226408	0.226408	0.261032	0.199374
990.307	452.342	2190.89	1738.55	1371.33	1530.21	1507.69	1507.69	1196.25	1326.13	1261.13	1281.31			914.857	1073.74	1051.22	1051.22	739.779	869.659	804.66	824.837			0.526219	0.617608	0.604654	0.604654	0.425516	0.500222	0.462835	0.47444			0.0887099	0.0831395	0.0862869	0.0862869	0.101035	0.0803483	0.0896292	0.0664166			0.165773	0.155699	0.228031	0.228031	0.263738	0.198162
995.309	452.89	2189.34	1736.45	1372.27	1531.35	1506.83	1506.83	1193.64	1329.05	1262.14	1282.37			915.794	1074.88	1050.35	1050.35	737.163	872.575	805.669	825.901			0.527394	0.619007	0.604884	0.604884	0.424522	0.502504	0.463974	0.475625			0.0898842	0.0845381	0.0865169	0.0865169	0.100042	0.0826309	0.0907686	0.0676016			0.167968	0.158318	0.228638	0.228638	0.261145	0.203791
1000.31	452.221	2191.05	1738.83	1373.78	1530.77	1509.94	1509.94	1194.71	1329.93	1263.31	1282.09			917.311	1074.29	1053.47	1053.47	738.234	873.456	806.835	825.614			0.527545	0.617826	0.605849	0.605849	0.424558	0.502324	0.464011	0.47481			0.0900359	0.0833574	0.0874816	0.0874816	0.100078	0.0824508	0.090805	0.0667865			0.168251	0.156107	0.231188	0.231188	0.261239	0.203347
1005.31	452.492	2191.51	1739.02	1378.96	1532.87	1508.94	1508.94	1193.85	1331.48	1259.82	1283.77			922.484	1076.4	1052.47	1052.47	737.376	875.011	803.343	827.297			0.530463	0.618969	0.605209	0.605209	0.424019	0.503164	0.461952	0.475727			0.0929532	0.0845007	0.0868419	0.0868419	0.099538	0.0832904	0.0887466	0.0677027			0.173703	0.158248	0.229497	0.229497	0.25983	0.205418
1010.31	450.378	2187.66	1737.29	1379.52	1533.16	1508.14	1508.14	1195.45	1330.42	1263.51	1281.67			923.05	1076.69	1051.67	1051.67	738.98	873.948	807.035	825.194			0.531317	0.619752	0.605353	0.605353	0.425364	0.503053	0.464537	0.47499			0.0938075	0.0852837	0.0869861	0.0869861	0.100884	0.0831798	0.0913319	0.0669661			0.175299	0.159714	0.229878	0.229878	0.263343	0.205145
1015.32	450.231	2187.74	1737.5	1372.88	1532.01	1508.63	1508.63	1193.52	1330.7	1263.09	1283.01			916.41	1075.54	1052.16	1052.16	737.042	874.228	806.617	826.532			0.527429	0.619015	0.605558	0.605558	0.424196	0.503152	0.464239	0.475701			0.0899195	0.0845461	0.0871907	0.0871907	0.0997152	0.0832781	0.0910333	0.0676768			0.168034	0.158333	0.230419	0.230419	0.260293	0.205387
1020.32	451.298	2186.64	1735.34	1378.9	1533.83	1508.17	1508.17	1196.21	1328.74	1260.1	1284.11			922.432	1077.35	1051.7	1051.7	739.733	872.268	803.623	827.636			0.531556	0.62083	0.606046	0.606046	0.426274	0.502648	0.463091	0.476929			0.0940462	0.0863614	0.0876794	0.0876794	0.101794	0.0827749	0.0898859	0.0689051			0.175745	0.161732	0.231711	0.231711	0.265719	0.204146
1025.32	451.057	2187.03	1735.97	1374.38	1534.32	1509.05	1509.05	1193.03	1333.86	1262.16	1283.76			917.908	1077.84	1052.58	1052.58	736.558	877.382	805.686	827.287			0.528758	0.620889	0.606334	0.606334	0.424292	0.505413	0.464113	0.476556			0.0912489	0.0864201	0.0879676	0.0879676	0.0998115	0.0855399	0.0909076	0.0685324			0.170518	0.161842	0.232472	0.232472	0.260544	0.210966
1030.32	452.317	2189.88	1737.56	1376.63	1536.7	1508.98	1508.98	1197.16	1334.55	1263.65	1284.73			920.162	1080.23	1052.51	1052.51	740.685	878.079	807.181	828.254			0.52957	0.621691	0.605738	0.605738	0.426278	0.50535	0.464547	0.476675			0.0920606	0.0872227	0.0873712	0.0873712	0.101797	0.085477	0.0913418	0.0686514			0.172035	0.163345	0.230896	0.230896	0.265727	0.21081
1035.32	450.486	2188.75	1738.26	1377.14	1537.1	1509.57	1509.57	1199.81	1337.54	1266.22	1286.69			920.666	1080.62	1053.09	1053.09	743.332	881.066	809.745	830.214			0.529647	0.621669	0.60583	0.60583	0.427629	0.506866	0.465836	0.477611			0.092138	0.0871998	0.0874634	0.0874634	0.103149	0.0869926	0.0926304	0.0695876			0.172179	0.163303	0.23114	0.23114	0.269256	0.214548
1040.32	453.209	2189.66	1736.45	1383.1	1537.62	1510.88	1510.88	1195.44	1337.41	1268	1287.42			926.628	1081.14	1054.41	1054.41	738.967	880.933	811.531	830.944			0.533634	0.622618	0.607221	0.607221	0.425562	0.507318	0.467351	0.47853			0.0961242	0.0881493	0.0888542	0.0888542	0.101081	0.087445	0.0941451	0.0705065			0.179628	0.165081	0.234815	0.234815	0.263859	0.215664
1045.33	451.52	2188.66	1737.14	1381.13	1538.07	1511.17	1511.17	1200.11	1336.19	1262.73	1287.91			924.655	1081.6	1054.7	1054.7	743.632	879.716	806.257	831.437			0.532287	0.622634	0.607149	0.607149	0.428079	0.506417	0.46413	0.478625			0.0947775	0.0881651	0.0887817	0.0887817	0.103599	0.0865439	0.0909244	0.0706011			0.177112	0.16511	0.234624	0.234624	0.27043	0.213442
1050.33	451.573	2184.54	1732.97	1382.7	1536.58	1511.31	1511.31	1194.48	1333.94	1263.44	1288.5			926.23	1080.1	1054.84	1054.84	738.011	877.47	806.965	832.031			0.534477	0.623269	0.608689	0.608689	0.425866	0.50634	0.465655	0.48012			0.0969673	0.0888001	0.0903224	0.0903224	0.101385	0.0864665	0.0924498	0.0720957			0.181204	0.1663	0.238695	0.238695	0.264652	0.213251
1055.33	451.747	2185.78	1734.04	1380.54	1536.93	1511.49	1511.49	1197.9	1333.46	1263.07	1289.11			924.064	1080.46	1055.02	1055.02	741.427	876.991	806.596	832.641			0.532897	0.623088	0.608419	0.608419	0.427572	0.505751	0.465155	0.480174			0.0953877	0.0886189	0.0900521	0.0900521	0.103092	0.0858772	0.0919491	0.0721506			0.178252	0.16596	0.237981	0.237981	0.269107	0.211797
1060.33	452.046	2186.86	1734.82	1374.88	1539.03	1513.34	1513.34	1202.09	1335.62	1265.06	1289.01			918.406	1082.56	1056.87	1056.87	745.619	879.145	808.591	832.538			0.529396	0.62402	0.60921	0.60921	0.429797	0.506765	0.466096	0.4799			0.0918871	0.0895509	0.0908432	0.0908432	0.105316	0.0868918	0.0928903	0.0718758			0.17171	0.167706	0.240072	0.240072	0.274914	0.2143
1065.33	452.859	2185.82	1732.96	1374.27	1538.92	1512.34	1512.34	1197.78	1333.65	1266.05	1288.73			917.793	1082.45	1055.87	1055.87	741.306	877.179	809.574	832.255			0.529609	0.624622	0.609286	0.609286	0.427768	0.506173	0.467161	0.480249			0.0920995	0.090153	0.0909187	0.0909187	0.103287	0.0862993	0.093956	0.0722256			0.172107	0.168833	0.240271	0.240271	0.269617	0.212838
1070.33	449.855	2183.44	1733.58	1375.16	1537.47	1513.34	1513.34	1200.02	1335.46	1264.75	1288.92			918.687	1081	1056.87	1056.87	743.547	878.986	808.277	832.45			0.529936	0.623563	0.609643	0.609643	0.428908	0.507035	0.466247	0.480191			0.0924265	0.0890947	0.0912762	0.0912762	0.104427	0.0871613	0.0930414	0.072167			0.172718	0.166851	0.241216	0.241216	0.272594	0.214964
1075.33	448.861	2185.85	1736.99	1378.79	1537.87	1514.62	1514.62	1199.62	1336.26	1267.32	1290.62			922.316	1081.39	1058.14	1058.14	743.148	879.79	810.846	834.148			0.530986	0.622569	0.609184	0.609184	0.427838	0.506504	0.466812	0.480227			0.093477	0.0881004	0.090817	0.090817	0.103357	0.0866303	0.0936065	0.0722033			0.174681	0.164989	0.240002	0.240002	0.269799	0.213655
1080.34	451.973	2183.74	1731.77	1379.38	1537.84	1511.86	1511.86	1197.62	1335.01	1264.9	1291.01			922.903	1081.37	1055.38	1055.38	741.146	878.533	808.424	834.536			0.532926	0.624433	0.609427	0.609427	0.427971	0.507305	0.466821	0.481899			0.0954168	0.089964	0.0910604	0.0910604	0.103491	0.0874315	0.0936152	0.0738752			0.178306	0.168479	0.240646	0.240646	0.270149	0.215631
1085.34	450.247	2185.45	1735.21	1383.27	1540.37	1514.41	1514.41	1196.75	1335.73	1269.48	1292.7			926.8	1083.9	1057.94	1057.94	740.279	879.259	813.006	836.226			0.534115	0.624649	0.609689	0.609689	0.426623	0.506717	0.468535	0.481917			0.0966051	0.0901801	0.0913224	0.0913224	0.102142	0.0868432	0.0953296	0.0738929			0.180527	0.168884	0.241338	0.241338	0.266628	0.21418
1090.34	449.979	2182.7	1732.72	1385.56	1538.57	1512.74	1512.74	1197.53	1335.79	1265.67	1290.48			929.089	1082.1	1056.27	1056.27	741.061	879.316	809.194	834.011			0.536203	0.624508	0.609604	0.609604	0.427687	0.507478	0.467008	0.481331			0.0986936	0.0900393	0.0912368	0.0912368	0.103206	0.0876041	0.0938027	0.0733069			0.18443	0.16862	0.241112	0.241112	0.269406	0.216057
1095.34	450.913	2183.51	1732.6	1381.37	1538.47	1513.56	1513.56	1199.83	1333.47	1264.14	1291.76			924.899	1082	1057.09	1057.09	743.355	876.998	807.666	835.282			0.533822	0.624497	0.610117	0.610117	0.429041	0.506175	0.466159	0.482098			0.096313	0.0900279	0.0917502	0.0917502	0.10456	0.086302	0.0929537	0.0740744			0.179981	0.168599	0.242469	0.242469	0.272941	0.212845
1100.34	449.468	2181.33	1731.86	1373.03	1541.14	1512.84	1512.84	1196.76	1335.72	1269.04	1291.03			916.555	1084.67	1056.37	1056.37	740.285	879.248	812.569	834.556			0.529232	0.626304	0.609963	0.609963	0.427451	0.50769	0.469189	0.481884			0.0917224	0.091835	0.0915966	0.0915966	0.10297	0.0878167	0.0959833	0.0738605			0.171403	0.171983	0.242063	0.242063	0.26879	0.216581
1105.34	451.327	2184.31	1732.98	1384.8	1543.52	1514.88	1514.88	1198.13	1338.59	1271.14	1294.05			928.328	1087.05	1058.41	1058.41	741.662	882.117	814.67	837.575			0.535682	0.62727	0.610742	0.610742	0.427968	0.509016	0.470096	0.483314			0.0981722	0.0928011	0.0923748	0.0923748	0.103487	0.0891426	0.096891	0.0752897			0.183455	0.173792	0.244119	0.244119	0.27014	0.219851
1110.35	451.805	2181.54	1729.74	1387.06	1543.9	1514.32	1514.32	1194.29	1341.17	1270.05	1293.56			930.584	1087.43	1057.85	1057.85	737.82	884.693	813.573	837.087			0.537992	0.628666	0.611568	0.611568	0.42655	0.511461	0.470345	0.483939			0.100482	0.0941968	0.0932007	0.0932007	0.10207	0.0915876	0.0971394	0.0759151			0.187772	0.176406	0.246302	0.246302	0.266439	0.225881
1115.35	451.079	2181.22	1730.14	1387.37	1543.71	1515.36	1515.36	1199.22	1340.05	1271.44	1292.39			930.897	1087.23	1058.89	1058.89	742.744	883.579	814.97	835.918			0.538047	0.628408	0.612024	0.612024	0.429297	0.510698	0.471043	0.48315			0.100538	0.0939393	0.093657	0.093657	0.104816	0.0908245	0.0978373	0.0751266			0.187876	0.175924	0.247508	0.247508	0.273609	0.223999
1120.35	449.569	2181.33	1731.76	1386.93	1545.06	1516.76	1516.76	1201.1	1341.53	1272.54	1291.94			930.453	1088.59	1060.29	1060.29	744.623	885.052	816.063	835.465			0.537288	0.628602	0.612263	0.612263	0.429981	0.511071	0.471234	0.482437			0.0997787	0.0941334	0.0938958	0.0938958	0.1055	0.0911979	0.0980283	0.0744136			0.186457	0.176287	0.248139	0.248139	0.275394	0.22492
1125.35	450.844	2180.36	1729.51	1386.22	1542.32	1514.79	1514.79	1200.96	1338.79	1272	1291.53			929.75	1085.84	1058.31	1058.31	744.486	882.313	815.528	835.057			0.537579	0.627832	0.611915	0.611915	0.43046	0.510152	0.471537	0.482828			0.10007	0.0933628	0.093548	0.093548	0.10598	0.0902781	0.098331	0.0748043			0.187002	0.174844	0.24722	0.24722	0.276645	0.222651
1130.35	451.633	2180.74	1729.11	1387.11	1544.76	1516.25	1516.25	1201.22	1340.03	1274.86	1293.8			930.639	1088.29	1059.78	1059.78	744.749	883.555	818.388	837.328			0.538218	0.62939	0.612902	0.612902	0.430712	0.510988	0.4733	0.484253			0.100709	0.0949214	0.094535	0.094535	0.106231	0.0911143	0.100094	0.0762293			0.188195	0.177763	0.249828	0.249828	0.277302	0.224714
1135.35	449.341	2179.41	1730.07	1393.49	1545.73	1516.93	1516.93	1201.55	1340.41	1274.17	1292.45			937.014	1089.26	1060.46	1060.46	745.072	883.933	817.696	835.975			0.541604	0.629602	0.612958	0.612958	0.430659	0.510922	0.472637	0.483202			0.104094	0.095133	0.094591	0.094591	0.106179	0.0910489	0.0994312	0.0751783			0.194522	0.178159	0.249976	0.249976	0.277165	0.224552
1140.35	447.978	2179.59	1731.62	1394.73	1545.64	1517.87	1517.87	1202.15	1341.59	1278.23	1293.65			938.259	1089.17	1061.39	1061.39	745.676	885.114	821.755	837.177			0.54184	0.628991	0.61295	0.61295	0.430625	0.511149	0.47456	0.483466			0.104331	0.094522	0.0945828	0.0945828	0.106144	0.0912759	0.101354	0.0754421			0.194964	0.177015	0.249954	0.249954	0.277074	0.225112
1145.36	450.369	2180.23	1729.86	1390.76	1545.99	1517.15	1517.15	1201.38	1344.02	1280.13	1295.27			934.288	1089.52	1060.68	1060.68	744.909	887.543	823.655	838.794			0.540093	0.629831	0.613158	0.613158	0.430617	0.513071	0.476138	0.48489			0.102584	0.095362	0.0947909	0.0947909	0.106136	0.0931973	0.102933	0.0768661			0.191699	0.178588	0.250504	0.250504	0.277054	0.229851
1150.36	450.373	2178.79	1728.41	1392.16	1546.48	1517.45	1517.45	1197.76	1337.17	1280.25	1294.92			935.691	1090.01	1060.98	1060.98	741.286	880.699	823.776	838.449			0.541358	0.63064	0.613847	0.613847	0.428882	0.509542	0.476608	0.485097			0.103849	0.0961713	0.0954798	0.0954798	0.104402	0.0896684	0.103403	0.0770735			0.194063	0.180104	0.252325	0.252325	0.272526	0.221147
1155.36	451.235	2177.79	1726.56	1394.95	1545.63	1516.51	1516.51	1197.11	1341.27	1277.03	1296.41			938.48	1089.16	1060.03	1060.03	740.632	884.8	820.557	839.942			0.543556	0.630826	0.613959	0.613959	0.428965	0.512465	0.475257	0.486484			0.106047	0.0963577	0.0955918	0.0955918	0.104484	0.0925919	0.102051	0.0784603			0.198171	0.180453	0.252621	0.252621	0.272742	0.228358
1160.36	449.695	2178.5	1728.81	1399.96	1548.23	1518.62	1518.62	1196.63	1341.99	1279.65	1297.39			943.49	1091.75	1062.15	1062.15	740.161	885.516	823.175	840.92			0.545747	0.631507	0.614383	0.614383	0.428134	0.512212	0.476152	0.486417			0.108237	0.0970382	0.096016	0.096016	0.103654	0.092339	0.102947	0.0783928			0.202264	0.181727	0.253742	0.253742	0.270574	0.227734
1165.36	449.622	2177.46	1727.84	1402.26	1548.7	1519.2	1519.2	1198.84	1341.23	1281.86	1296.84			945.788	1092.23	1062.72	1062.72	742.365	884.761	825.389	840.366			0.547383	0.632139	0.615061	0.615061	0.42965	0.512063	0.477701	0.486369			0.109874	0.0976702	0.0966946	0.0966946	0.10517	0.0921898	0.104496	0.0783454			0.205322	0.182911	0.255535	0.255535	0.274531	0.227366
1170.36	451.175	2177.03	1725.86	1396.95	1547.74	1517.02	1517.02	1203.44	1343.82	1281.87	1294.14			940.479	1091.27	1060.55	1060.55	746.972	887.346	825.398	837.672			0.544934	0.632306	0.614503	0.614503	0.432812	0.514147	0.478253	0.485365			0.107424	0.0978372	0.0961364	0.0961364	0.108331	0.094274	0.105048	0.0773414			0.200745	0.183224	0.25406	0.25406	0.282784	0.232506
1175.37	449.161	2173.94	1724.78	1402.86	1546.25	1517.94	1517.94	1199.68	1342.61	1284.47	1296.8			946.382	1089.78	1061.47	1061.47	743.211	886.141	828.002	840.329			0.548697	0.631836	0.615423	0.615423	0.430902	0.51377	0.480062	0.487209			0.111188	0.0973675	0.0970563	0.0970563	0.106421	0.0938968	0.106857	0.0791854			0.207778	0.182344	0.256491	0.256491	0.277798	0.231576
1180.37	448.597	2175.41	1726.82	1404.49	1549.76	1519.49	1519.49	1200.34	1343.86	1284.13	1296.17			948.013	1093.29	1063.02	1063.02	743.87	887.39	827.659	839.702			0.548995	0.633124	0.615593	0.615593	0.430775	0.513888	0.479298	0.486272			0.111485	0.0986557	0.0972265	0.0972265	0.106295	0.0940143	0.106092	0.0782478			0.208334	0.184757	0.256941	0.256941	0.277468	0.231866
1185.37	447.135	2175.9	1728.76	1407.2	1549.56	1518.6	1518.6	1198.12	1342.74	1286.05	1299.39			950.725	1093.08	1062.13	1062.13	741.652	886.271	829.58	842.915			0.549945	0.632291	0.614385	0.614385	0.429007	0.512662	0.479869	0.487583			0.112436	0.0978225	0.0960185	0.0960185	0.104527	0.0927884	0.106664	0.0795588			0.21011	0.183196	0.253749	0.253749	0.272853	0.228842
1190.37	448.364	2172.27	1723.91	1406.84	1550.23	1517.88	1517.88	1201.3	1341.04	1285.88	1298.53			950.365	1093.75	1061.4	1061.4	744.824	884.569	829.41	842.052			0.551284	0.63446	0.615696	0.615696	0.432055	0.513118	0.481121	0.488455			0.113775	0.0999917	0.0973287	0.0973287	0.107574	0.0932443	0.107916	0.0804308			0.212613	0.187258	0.257211	0.257211	0.280808	0.229967
1195.37	446.759	2173.35	1726.59	1395.46	1549.98	1520.43	1520.43	1192.92	1342.23	1282.59	1296.09			938.984	1093.51	1063.96	1063.96	736.452	885.758	826.119	839.62			0.543836	0.633333	0.616218	0.616218	0.426535	0.513009	0.478467	0.486287			0.106327	0.0988643	0.097851	0.097851	0.102054	0.0931354	0.105262	0.078263			0.198694	0.185147	0.258591	0.258591	0.266398	0.229698
1200.37	448.87	2173.13	1724.26	1412.67	1551.14	1520.89	1520.89	1199.2	1345.81	1285.53	1298.2			956.195	1094.66	1064.42	1064.42	742.73	889.334	829.056	841.731			0.554555	0.634861	0.617321	0.617321	0.430754	0.515778	0.480819	0.48817			0.117045	0.100392	0.098954	0.098954	0.106273	0.0959046	0.107614	0.0801464			0.218724	0.188009	0.261506	0.261506	0.277411	0.236528
1205.37	449.382	2171.61	1722.23	1421.17	1551.03	1521.07	1521.07	1193.25	1345.29	1280.57	1298.97			964.696	1094.55	1064.59	1064.59	736.775	888.813	824.094	842.501			0.560144	0.635546	0.61815	0.61815	0.427804	0.516083	0.478505	0.489193			0.122635	0.101077	0.0997832	0.0997832	0.103323	0.09621	0.105299	0.0811689			0.229169	0.189291	0.263698	0.263698	0.269711	0.237281
	456.473
	456.473																							0.437509	0.534469	0.518367	0.518367	0.324481	0.419873	0.373206	0.408024			0.535128	0.533977	0.3784	0.3784	0.383089	0.405469	0.402655	0.394804
																																					0
																																					5.002
																																					10.003
																																					15.005
																																					20.006
																																					25.008
																																					30.009
																																					35.011
																																					40.012
																																					45.014
																																					50.016
																																					55.017
																																					60.019
																																					65.02
																																					70.022
																																					75.023
																																					80.025
																																					85.026
																																					90.028
																																					95.03
																																					100.031
																																					105.033
																																					110.034
																																					115.036
																																					120.037
																																					125.039
																																					130.04
																																					135.042
																																					140.043
																																					145.045
																																					150.047
																																					155.048
																																					160.05
																																					165.051
																																					170.053
																																					175.054
																																					180.056
																																					185.057
																																					190.059
																																					195.061
																																					200.062
																																					205.064
																																					210.065
																																					215.067
																																					220.068
																																					225.07
																																					230.071
																																					235.073
																																					240.075
																																					245.076
																																					250.078
																																					255.079
																																					260.081
																																					265.082
																																					270.084
																																					275.085
																																					280.087
																																					285.089
																																					290.09
																																					295.092
																																					300.093
																																					305.095
																																					310.096
																																					315.098
																																					320.099
																																					325.101
																																					330.103
																																					335.104
																																					340.106
																																					345.107
																																					350.109
																																					355.11
																																					360.112
																																					365.113
																																					370.115
																																					375.116
																																					380.118
																																					385.12
																																					390.121
																																					395.123
																																					400.124
																																					405.126
																																					410.127
																																					415.129
																																					420.13
																																					425.132
																																					430.134
																																					435.135
																																					440.137
																																					445.138
																																					450.14
																																					455.141
																																					460.143
																																					465.144
																																					470.146
																																					475.148
																																					480.149
																																					485.151
																																					490.152
																																					495.154
																																					500.155
																																					505.157
																																					510.158
																																					515.16
																																					520.161
																																					525.163
																																					530.165
																																					535.166
																																					540.168
																																					545.169
																																					550.171
																																					555.172
																																					560.174
																																					565.175
																																					570.177
																																					575.179
																																					580.18
																																					585.182
																																					590.183
																																					595.185
																																					600.186
																																					605.188
																																					610.189
																																					615.191
																																					620.193
																																					625.194
																																					630.196
																																					635.197
																																					640.199
																																					645.2
																																					650.202
																																					655.203
																																					660.205
																																					665.207
																																					670.208
																																					675.21
																																					680.211
																																					685.213
																																					690.214
																																					695.216
																																					700.217
																																					705.219
																																					710.221
																																					715.222
																																					720.224
																																					725.225
																																					730.227
																																					735.228
																																					740.23
																																					745.231
																																					750.233
																																					755.234
																																					760.236
																																					765.238
																																					770.239
																																					775.241
																																					780.242
																																					785.244
																																					790.245
																																					795.247
																																					800.248
																																					805.25
																																					810.252
																																					815.253
																																					820.255
																																					825.256
																																					830.258
																																					835.259
																																					840.261
																																					845.262
																																					850.264
																																					855.266
																																					860.267
																																					865.269
																																					870.27
																																					875.272
																																					880.273
																																					885.275
																																					890.276
																																					895.278
																																					900.28
																																					905.281
																																					910.283
																																					915.284
																																					920.286
																																					925.287
																																					930.289
																																					935.29
																																					940.292
																																					945.294
																																					950.295
																																					955.297
																																					960.298
																																					965.3
																																					970.301
																																					975.303
																																					980.304
																																					985.306
																																					990.307
																																					995.309
																																					1000.31
																																					1005.31
																																					1010.31
																																					1015.32
																																					1020.32
																																					1025.32
																																					1030.32
																																					1035.32
																																					1040.32
																																					1045.33
																																					1050.33
																																					1055.33
																																					1060.33
																																					1065.33
																																					1070.33
																																					1075.33
																																					1080.34
																																					1085.34
																																					1090.34
																																					1095.34
																																					1100.34
																																					1105.34
																																					1110.35
																																					1115.35
																																					1120.35
																																					1125.35
																																					1130.35
																																					1135.35
																																					1140.35
																																					1145.36
																																					1150.36
																																					1155.36
																																					1160.36
																																					1165.36
																																					1170.36
																																					1175.37
																																					1180.37
																																					1185.37
																																					1190.37
																																					1195.37
																																					1200.37
																																					1205.37
[truncated: 4 more columns]
