# Supplementary material for: Dissecting the phase separation and oligomerization activities of the carboxysome positioning protein McdB
Source: eLife. 2023 Sep 5;12:e81362. doi: 10.7554/eLife.81362 (PMC10554743; doi:10.7554/eLife.81362)
Supplement: Figure 3—source data 2. [file elife-81362-fig3-data2.xlsx]

## Sheet: pre-centrifuge
HD (nm)	pH_7.2			pH_8.2			pH_10.2
0.0148913	0	0	0	0	0		0	0
0.0160922	0	0	0	0	0		0	0
0.01739	0	0	0	0	0		0	0
0.0187923	0	0	0	0	0		0	0
0.0203078	0	0	0	0	0		0	0
0.0219455	0	0	0	0	0		0	0
0.0237152	0	0	0	0	0		0	0
0.0256277	0	0	0	0	0		0	0
0.0276944	0	0	0	0	0		0	0
0.0299278	0	0	0	0	0		0	0
0.0323412	0	0	0	0	0		0	0
0.0349493	0	0	0	0	0		0	0
0.0377677	0	0	0	0	0		0	0
0.0408135	0	0	0	0	0		0	0
0.0441048	0	0	0	0	0		0	0
0.0476615	0	0	0	0	0		0	0
0.0515051	0	0	0	0	0		0	0
0.0556586	0	0	0	0	0		0	0
0.0601471	0	0	0	0	0		0	0
0.0649975	0	0	0	0	0		0	0
0.0702391	0	0	0	0	0		0	0
0.0759034	0	0	0	0	0		0	0
0.0820245	0	0	0	0	0		0	0
0.0886392	0	0	0	0	0		0	0
0.0957874	0	0	0	0	0		0	0
0.103512	0	0	0	0	0		0	0
0.111859	0	0	0	0	0		0	0
0.12088	0	0	0	0	0		0	0
0.130628	0	0	0	0	0		0	0
0.141163	0	0	0	0	0		0	0
0.152546	0	0	0	0	0		0	0
0.164848	0	0	0	0	0		0	0
0.178142	0	0	0	0	0		0	0
0.192508	0	0	0	0	0		0	0
0.208032	0	0	0	0	0		0	0
0.224809	0	0	0	0	0		0	0
0.242938	0	0	0	0	0		0	0
0.262529	0	0	0	0	0		0	0
0.2837	0	0	0	0	0		0	0
0.306579	0	0	0	0	0		0	0
0.331302	0	0	0	0	0		0	0
0.35802	0	0	0	0	0		0	0
0.386891	0	0	0	0	0		0	0
0.418091	0	0	0	0	0		0	0
0.451808	0	0	0	0	0		0	0
0.488243	0	0	0	0	0		0	0
0.527616	0	0	0	0	0		0	0
0.570165	0	0	0	0	0		0	0
0.616145	0	0	0	0	0		0	0
0.665832	0	0	0	0	0		0	0
0.719527	0	0	0	0	0		0	0
0.777552	0	0	0	0	0		0	0
0.840256	0	0	0	0	0		0	0
0.908017	0	0	0	0	0		0	0
0.981242	0	0	0	0	0		0	0
1.06037	0	0	0	0	0		0	0
1.14588	0	0	0	0	0		0	0
1.23829	0	0	0	0	0		0	0
1.33815	0	0	0	0	0		0	0
1.44606	0	0	0	0	0		0	0
1.56268	0	0	0	0	0		0	0
1.6887	0	0	0	0	0		0	0
1.82488	0	0	0	0	0		0	0
1.97204	0	0	0	0	0		0	0.000416
2.13108	0	0	0	0	0		0	0
2.30293	0	0	0	0	0		0	0
2.48865	0	0	0	0	0		0	0
2.68934	0	0	0	0	0		0	0
2.90622	0	0	0	0	0		0	0
3.14058	0	0	0	0	0		0	0
3.39385	0	0	0	0	0		0	0
3.66754	0	0	0	0	0		0	0
3.9633	0	0	0	0	0		0	0
4.28291	0	0	0	0	0		0	0
4.6283	0	0	0	0	0		0	0
5.00154	0	0	0	0	0		0	0
5.40488	0	0	0	0	0		0	0
5.84075	0	0	0	0	0		0	0
6.31176	0	0	0	0	0		0	0
6.82076	0	0	0	0	0		0	0
7.37081	0	0	0	0	0		0	0
7.96521	0	0	0	0	0		0	0
8.60755	0	0	0	0	0		0	0
9.30169	0	0	0	0	0		0	0
10.0518	0	0	0	0	0		0.010245	0
10.8624	0	0	0	0	0		0.028558	0
11.7384	0	0	0	0	0		0.049025	0
12.685	0	0	0	0	0		0.068289	0
13.708	0	0	0	0	0		0.084588	0
14.8134	0	0	0	0	0		0.096922	0
16.008	0	0	0	0	0		0.104656	0
17.299	0	0	0	0.000483	0		0.107365	0.003547
18.694	4.62e-05	0	0	0.003661	0		0.104775	0.010829
20.2015	0.000536	0	0	0.007972	0		0.096759	0.0199
21.8307	0.001213	0	0	0.012445	0		0.083385	0.029578
23.5911	0.001917	0	0	0.01663	0		0.065062	0.039197
25.4936	0.002572	0	0	0.020327	0		0.04293	0.048317
27.5495	0.003147	0	0	0.023444	0		0.019785	0.056596
29.7712	0.003627	0	0	0.025945	0.034789		0.001944	0.063731
32.172	0.004009	0	0	0.027819	0.088105		0	0.069436
34.7665	0.004296	0	0	0.029075	0.13232		0	0.073441
37.5701	0.004493	0	0	0.029734	0.154283		0	0.075481
40.5999	0.004608	0	0	0.029832	0.149745		0	0.075306
43.874	0.004654	0	0.005757	0.029415	0.119826		0	0.07268
47.4121	0.004645	0	0.013338	0.028538	0.071364		0	0.067397
51.2356	0.004597	0	0.020104	0.027265	0.021125		0	0.059307
55.3674	0.004526	0	0.02505	0.025666	0		0	0.048394
59.8324	0.004451	0	0.027985	0.023815	0		0	0.034966
64.6574	0.004389	0	0.02906	0.021789	0		0	0.020099
69.8716	0.004357	0	0.028564	0.019663	0		0	0.006602
75.5063	0.004371	0	0.026831	0.017511	0		0	0
81.5953	0.004444	0	0.024198	0.015402	0		0	0
88.1754	0.004586	0	0.020982	0.013397	0		0	0
95.2862	0.004805	0	0.01747	0.011551	0		0	0
102.97	0.005104	0	0.013912	0.009908	0		0	0
111.274	0.00548	0	0.010513	0.008502	0		0	0
120.248	0.00593	0	0.007439	0.007356	0		0	0
129.945	0.006444	0	0.00481	0.00648	0		0	0
140.424	0.007007	0	0.002712	0.005876	0		0	0
151.748	0.007604	0	0.001196	0.005535	0		0	0
163.986	0.008215	0	0.000293	0.005436	0		0	0
177.21	0.008819	0	0	0.005553	0		0	0
191.501	0.009394	0	0	0.005853	0		0	0
206.944	0.009917	0	0.000457	0.006294	0		0	0
223.632	0.01037	0	0.001345	0.006833	0		0	0
241.667	0.010733	0.000298	0.002563	0.007424	0		0	0
261.156	0.010993	0.010218	0.004018	0.008019	0		0	0
282.216	0.011139	0.023871	0.005623	0.00857	0		0	0
304.975	0.011165	0.037427	0.007301	0.009029	0		0	0
329.569	0.011071	0.048981	0.008978	0.009354	0		0	0
356.146	0.010863	0.057589	0.010591	0.009503	0		0	0
384.867	0.010551	0.062778	0.012082	0.009438	0		0	0
415.904	0.010151	0.06433	0.013404	0.009128	0		0	0
449.444	0.009682	0.062212	0.014516	0.008546	0		0	0
485.688	0.009166	0.056547	0.015388	0.007675	0		0	0
524.855	0.008629	0.047633	0.015997	0.006509	0		0	0
567.181	0.008097	0.036015	0.016328	0.005065	0		0	0
612.921	0.007595	0.022674	0.016376	0.003405	0		0	0
662.348	0.007148	0.009484	0.016143	0.0017	0		0	0
715.762	0.006777	9.77e-05	0.01564	0.000341	0		0	0
773.483	0.0065	0	0.014885	0	0		0	0
835.859	0.006333	0	0.013904	0	0		0	0
903.266	0.006285	0	0.012731	0	0		0	0
976.108	0.006361	0	0.011403	0	0		0	0
1054.82	0.006563	0	0.009967	0	0		0	0
1139.89	0.006886	0	0.008468	0	0		0	0
1231.81	0.007323	0	0.006957	0	0		0	0
1331.15	0.007862	0	0.005483	0	0		0	0
1438.5	0.008492	0	0.004095	0	0		0	0
1554.5	0.009197	0	0.002839	0	0		0	0
1679.86	0.00996	0	0.001757	0	0		0	0
1815.33	0.010767	0	0.000892	0	0		0	0
1961.73	0.0116	0	0.000289	0	0		0	0
2119.92	0.012447	0	0	0	0		0	0
2290.88	0.013292	0	0	0	0		0	0
2475.63	0.014126	0	0	0	0		0	0
2675.27	0.01494	0	0.000111	0	0		0	0
2891.01	0.015725	0	0.000525	0	0		0	0
3124.15	0.016477	0	0.001178	0	0		0	0
3376.09	0.017194	0	0.002002	0	0		0	0
3648.35	0.017873	0.003576	0.002946	0	0		0	0
3942.56	0.018513	0.011942	0.003962	0	0		0	0
4260.5	0.019116	0.02122	0.005005	0	0		0	0
4604.08	0.019681	0.029189	0.006031	0	0		0	0
4975.37	0.020209	0.03482	0.007001	0	0		0	0
5376.6	0.020698	0.037696	0.007879	0	0		0	0
5810.18	0.021146	0.037718	0.008633	0	0		0	0
6278.73	0.021548	0.035001	0.009241	0	0		0	0
6785.07	0.021897	0.029827	0.009685	0	0		0	0
7332.24	0.022182	0.022664	0.009957	0	0		0	0
7923.53	0.022389	0.014268	0.010057	0	0		0	0
8562.51	0.022501	0.00594	0.009995	0	0		0	0
9253.02	0.022497	4.82e-05	0.009786	0	0		0	0
9999.21	0.022352	0	0.009454	0	0		0	0
10805.6	0.022038	0	0.009028	0	0		0	0
11677	0.021525	0	0.008543	0	0		0	0
12618.6	0.020778	0	0.008034	0	0		0	0
13636.2	0.019764	0	0.007537	0	0		0	0
14735.9	0.018445	0	0.007087	0	0		0	0
15924.3	0.01679	0	0.006715	0	0		0	0
17208.4	0.014767	0	0.006445	0	0		0	0
18596.2	0.012361	0	0.006294	0	0		0	0
20095.8	0	0	0	0	0		0	0
21716.4	0	0	0	0	0		0	0
23467.7	0	0	0	0	0		0	0
25360.2	0	0	0	0	0		0	0
27405.3	0	0	0	0	0		0	0
29615.4	0	0	0	0	0		0	0
32003.7	0	0	0	0	0		0	0
34584.5	0	0	0	0	0		0	0
37373.5	0	0	0	0	0		0	0
40387.5	0	0	0	0	0		0	0
43644.4	0	0	0	0	0		0	0
47164	0	0	0	0	0		0	0
50967.5	0	0	0	0	0		0	0
55077.7	0	0	0	0	0		0	0
59519.3	0	0	0	0	0		0	0
64319.1	0	0	0	0	0		0	0
69506	0	0	0	0	0		0	0
75111.2	0	0	0	0	0		0	0
81168.4	0	0	0	0	0		0	0
87714.1	0	0	0	0	0		0	0
94787.6	0	0	0	0	0		0	0
102432	0	0	0	0	0		0	0
110692	0	0	0	0	0		0	0
119618	0	0	0	0	0		0	0
129265	0	0	0	0	0		0	0
139689	0	0	0	0	0		0	0
150954	0	0	0	0	0		0	0
163128	0	0	0	0	0		0	0
176283	0	0	0	0	0		0	0
190499	0	0	0	0	0		0	0
205861	0	0	0	0	0		0	0
222462	0	0	0	0	0		0	0
240402	0	0	0	0	0		0	0
259789	0	0	0	0	0		0	0
280739	0	0	0	0	0		0	0
303379	0	0	0	0	0		0	0
327844	0	0	0	0	0		0	0
354283	0	0	0	0	0		0	0
382853	0	0	0	0	0		0	0
413728	0	0	0	0	0		0	0
447092	0	0	0	0	0		0	0
483147	0	0	0	0	0		0	0
522109	0	0	0	0	0		0	0
564214	0	0	0	0	0		0	0
609714	0	0	0	0	0		0	0
658883	0	0	0	0	0		0	0
712017	0	0	0	0	0		0	0
769436	0	0	0	0	0		0	0
831486	0	0	0	0	0		0	0
898539	0	0	0	0	0		0	0
971000	0	0	0	0	0		0	0
1.0493e+06	0	0	0	0	0		0	0
1.13392e+06	0	0	0	0	0		0	0
1225367	0	0	0	0	0		0	0
1.32418e+06	0	0	0	0	0		0	0
1.43097e+06	0	0	0	0	0		0	0
1.54637e+06	0	0	0	0	0		0	0
1.67107e+06	0	0	0	0	0		0	0
1.80583e+06	0	0	0	0	0		0	0
1.95146e+06	0	0	0	0	0		0	0
2.10883e+06	0	0	0	0	0		0	0
2278895	0	0	0	0	0		0	0
2462672	0	0	0	0	0		0	0
2.66127e+06	0	0	0	0	0		0	0
2.87588e+06	0	0	0	0	0		0	0
3.1078e+06	0	0	0	0	0		0	0
3.35842e+06	0	0	0	0	0		0	0
3.62926e+06	0	0	0	0	0		0	0
3921933	0	0	0	0	0		0	0
4.23821e+06	0	0	0	0	0		0	0
4579992	0	0	0	0	0		0	0
4.94934e+06	0	0	0	0	0		0	0
5348466	0	0	0	0	0		0	0
5.77978e+06	0	0	0	0	0		0	0
							0	0
							0	0

## Sheet: post-centrifuge
HD (nm)	pH_7.2			pH_8.2			pH_10.2
0.0148913	0	0	0	0	0		0	0
0.0160922	0	0	0	0	0		0	0
0.01739	0	0	0	0	0		0	0
0.0187923	0	0	0	0	0		0	0
0.0203078	0	0	0	0	0		0	0
0.0219455	0	0	0	0	0		0	0
0.0237152	0	0	0	0	0		0	0
0.0256277	0	0	0	0	0		0	0
0.0276944	0	0	0	0	0		0	0
0.0299278	0	0	0	0	0		0	0
0.0323412	0	0	0	0	0		0	0
0.0349493	0	0	0	0	0		0	0
0.0377677	0	0	0	0	0		0	0
0.0408135	0	0	0	0	0		0	0
0.0441048	0	0	0	0	0		0	0
0.0476615	0	0	0	0	0		0	0
0.0515051	0	0	0	0	0		0	0
0.0556586	0	0	0	0	0		0	0
0.0601471	0	0	0	0	0		0	0
0.0649975	0	0	0	0	0		0	0
0.0702391	0	0	0	0	0		0	0
0.0759034	0	0	0	0	0		0	0
0.0820245	0	0	0	0	0		0	0
0.0886392	0	0	0	0	0		0	0
0.0957874	0	0	0	0	0		0	0
0.103512	0	0	0	0	0		0	0
0.111859	0	0	0	0	0		0	0
0.12088	0	0	0	0	0		0	0
0.130628	0	0	0	0	0		0	0
0.141163	0	0	0	0	0		0	0
0.152546	0	0	0	0	0		0	0
0.164848	0	0	0	0	0		0	0
0.178142	0	0	0	0	0		0	0
0.192508	0	0	0	0	0		0	0
0.208032	0	0	0	0	0		0	0
0.224809	0	0	0	0	0		0	0
0.242938	0	0	0	0	0		0	0
0.262529	0	0	0	0	0		0	0
0.2837	0	0	0	0	0		0	0
0.306579	0	0	0	0	0		0	0
0.331302	0	0	0	0	0		0	0
0.35802	0	0	0	0	0		0	0
0.386891	0	0	0	0	0		0	0
0.418091	0	0	0	0	0		0	0
0.451808	0	0	0	0	0		0	0
0.488243	0	0	0	0	0		0	0
0.527616	0	0	0	0	0		0	0
0.570165	0	0	0	0	0		0	0
0.616145	0	0	0	0	0		0	0
0.665832	0	0	0	0	0		0	0
0.719527	0	0	0	0	0		0	0
0.777552	0	0	0	0	0		0	0
0.840256	0	0	0	0	0		0	0
0.908017	0	0	0	0	0		0	0
0.981242	0	0	0	0	0		0	0
1.06037	0	0	0	0.000992	0		0	0
1.14588	0	0	0	0.001017	0		0	0
1.23829	0	0	0	0.001046	0		0	0
1.33815	0	0	0	0.001081	0		0	0
1.44606	0	0	0	0.001123	0		0	0
1.56268	0	0	0	0.001173	0		0	0
1.6887	0	0	0	0.001231	0		0	0
1.82488	0	0	0	0.001299	0		0	0
1.97204	0	0	0	0.001377	0		0	0
2.13108	0	0	0	0.001467	0		0	0
2.30293	0	0	0	0.001569	0		0	0
2.48865	0	0	0	0.001685	0		0	0
2.68934	0	0	0	0.001814	0		0	0
2.90622	0	0	0	0.001958	0		0	0
3.14058	0	0	0	0.002118	0		0	0
3.39385	0	0	0	0.002293	0		0	0
3.66754	0	0	0	0.002485	0		0	0
3.9633	0	0	0	0.002694	0		0	0
4.28291	0	0	0	0.00292	0		0	0
4.6283	0	0	0	0.003163	0		0	0
5.00154	0	0	0	0.003422	0		0	0
5.40488	0	0	0	0.003699	0		0	0
5.84075	0	0	0	0.003992	0		0	0
6.31176	0	0	0	0.004301	0		0	0
6.82076	0	0	0	0.004626	0		0	0.001564
7.37081	0	0	0	0.004965	0		0	0.008969
7.96521	0	0	0	0.005317	0		0	0.019185
8.60755	0	0	0	0.005682	0		0	0.030232
9.30169	0	0	0	0.006059	0		0	0.041083
10.0518	0	0	0	0.006444	0		0.031531	0.051166
10.8624	0	0	0	0.006838	0		0.074976	0.060109
11.7384	0	0	0	0.007239	0		0.114524	0.067634
12.685	0	0	0	0.007644	0		0.142562	0.07352
13.708	0	0	0	0.008052	0.001743		0.155817	0.077583
14.8134	0	0	0	0.008461	0.006075		0.153135	0.079675
16.008	0	0	0	0.00887	0.011368		0.1347	0.079682
17.299	0	0	0	0.009275	0.016706		0.10223	0.077527
18.694	0	0	0	0.009675	0.021685		0.060318	0.073167
20.2015	0	0	0	0.010069	0.026139		0.019609	0.066598
21.8307	0	0	0	0.010454	0.030006		0	0.057869
23.5911	0	0	0	0.010828	0.033268		0	0.047115
25.4936	0	0.000405	0	0.011189	0.035931		0	0.034651
27.5495	0	0.001896	0	0.011536	0.038011		0	0.021209
29.7712	0	0.003912	0	0.011867	0.039531		0	0.008473
32.172	0	0.006107	0	0.012181	0.040522		0	0
34.7665	0	0.008318	0	0.012475	0.041014		0	0
37.5701	0.000138	0.010465	0	0.012749	0.041046		0	0
40.5999	0.006054	0.012508	0	0.013002	0.040656		0	0
43.874	0.014363	0.014422	0	0.013232	0.039884		0	0
47.4121	0.022917	0.016189	0.003555	0.013438	0.038771		0	0
51.2356	0.030711	0.017798	0.013856	0.013619	0.037359		0	0
55.3674	0.037305	0.019239	0.026297	0.013776	0.03569		0	0
59.8324	0.042508	0.020506	0.038273	0.013907	0.033804		0	0
64.6574	0.046258	0.021596	0.048665	0.014012	0.031743		0	0
69.8716	0.048561	0.022509	0.057046	0.014091	0.029543		0	0
75.5063	0.049471	0.023244	0.063293	0.014143	0.027241		0	0
81.5953	0.04908	0.023807	0.067413	0.01417	0.024872		0	0
88.1754	0.047512	0.024201	0.069478	0.014172	0.022466		0	0
95.2862	0.044915	0.024435	0.069593	0.014148	0.020053		0	0
102.97	0.041461	0.024515	0.067882	0.0141	0.017659		0	0
111.274	0.037338	0.024452	0.064482	0.014028	0.015305		0	0
120.248	0.032745	0.024256	0.059539	0.013934	0.013012		0	0
129.945	0.027888	0.023938	0.053208	0.013817	0.010798		0	0
140.424	0.02297	0.023509	0.045654	0.01368	0.008678		0	0
151.748	0.018189	0.022982	0.03707	0.013523	0.006667		0	0
163.986	0.013731	0.022367	0.027718	0.013347	0.004784		0	0
177.21	0.009763	0.021676	0.018023	0.013154	0.003062		0	0
191.501	0.006425	0.020921	0.008828	0.012945	0.00157		0	0
206.944	0.00383	0.020112	0.001869	0.012722	0.00046		0	0
223.632	0.002054	0.019259	0	0.012484	0		0	0
241.667	0.001136	0.018373	0	0.012235	0		0	0
261.156	0.001067	0.017462	0	0.011974	0		0	0
282.216	0.001796	0.016535	0	0.011703	0		0	0
304.975	0.00322	0.015599	0	0.011424	0		0	0
329.569	0.005187	0.01466	0	0.011136	0		0	0
356.146	0.007494	0.013725	0	0.010842	0		0	0
384.867	0.009891	0.0128	0	0.010541	0		0	0
415.904	0.01208	0.011889	0	0.010236	0		0	0
449.444	0.013727	0.010997	0	0.009927	0		0	0
485.688	0.014473	0.010126	0	0.009614	0		0	0
524.855	0.013965	0.00928	0	0.0093	0		0	0
567.181	0.011927	0.008462	0	0.008983	0		0	0
612.921	0.008324	0.007674	0	0.008666	0		0	0
662.348	0.00373	0.006917	0	0.008349	0		0	0
715.762	0	0.006194	0	0.008033	0		0	0
773.483	0	0.005504	0	0.007718	0		0	0
835.859	0	0.00485	0	0.007405	0		0	0
903.266	0	0.004231	0	0.007095	0		0	0
976.108	0	0.003648	0	0.006788	0		0	0
1054.82	0	0.003102	0	0.006485	0		0	0
1139.89	0	0.002591	0	0.006187	0		0	0
1231.81	0	0.002118	0	0.005893	0		0	0
1331.15	0	0.00168	0	0.005605	0		0	0
1438.5	0	0.001279	0	0.005323	0		0	0
1554.5	0	0.000915	0	0.005048	0		0	0
1679.86	0	0.000591	0	0.004779	0		0	0
1815.33	0	0.000315	0	0.004518	0		0	0
1961.73	0	0.000106	0	0.004265	0		0	0
2119.92	0	0	0	0.004019	0		0	0
2290.88	0	0	0	0.003782	0		0	0
2475.63	0	0	0	0.003554	0		0	0
2675.27	0	0	0	0.003335	0		0	0
2891.01	0	0	0	0.003125	0		0	0
3124.15	0	0	0	0.002925	0		0	0
3376.09	0	0	0	0.002734	0		0	0
3648.35	0	0	0	0.002554	0		0	0
3942.56	0	0	0	0.002383	0		0	0
4260.5	0	0	0	0.002223	0		0	0
4604.08	0	0	0	0.002073	0		0	0
4975.37	0	0	0	0.001934	0		0	0
5376.6	0	0	0	0.001805	0		0	0
5810.18	0	0	0	0.001686	0		0	0
6278.73	0	0	0	0.001578	0		0	0
6785.07	0	0	0	0.00148	0		0	0
7332.24	0	0	0	0.001392	0		0	0
7923.53	0	0	0	0.001315	0		0	0
8562.51	0	0	0	0	0		0	0
9253.02	0	0	0	0	0		0	0
9999.21	0	0	0	0	0		0	0
10805.6	0	0	0	0	0		0	0
11677	0	0	0	0	0		0	0
12618.6	0	0	0	0	0		0	0
13636.2	0	0	0	0	0		0	0
14735.9	0	0	0	0	0		0	0
15924.3	0	0	0	0	0		0	0
17208.4	0	0	0	0	0		0	0
18596.2	0	0	0	0	0		0	0
20095.8	0	0	0	0	0		0	0
21716.4	0	0	0	0	0		0	0
23467.7	0	0	0	0	0		0	0
25360.2	0	0	0	0	0		0	0
27405.3	0	0	0	0	0		0	0
29615.4	0	0	0	0	0		0	0
32003.7	0	0	0	0	0		0	0
34584.5	0	0	0	0	0		0	0
37373.5	0	0	0	0	0		0	0
40387.5	0	0	0	0	0		0	0
43644.4	0	0	0	0	0		0	0
47164	0	0	0	0	0		0	0
50967.5	0	0	0	0	0		0	0
55077.7	0	0	0	0	0		0	0
59519.3	0	0	0	0	0		0	0
64319.1	0	0	0	0	0		0	0
69506	0	0	0	0	0		0	0
75111.2	0	0	0	0	0		0	0
81168.4	0	0	0	0	0		0	0
87714.1	0	0	0	0	0		0	0
94787.6	0	0	0	0	0		0	0
102432	0	0	0	0	0		0	0
110692	0	0	0	0	0		0	0
119618	0	0	0	0	0		0	0
129265	0	0	0	0	0		0	0
139689	0	0	0	0	0		0	0
150954	0	0	0	0	0		0	0
163128	0	0	0	0	0		0	0
176283	0	0	0	0	0		0	0
190499	0	0	0	0	0		0	0
205861	0	0	0	0	0		0	0
222462	0	0	0	0	0		0	0
240402	0	0	0	0	0		0	0
259789	0	0	0	0	0		0	0
280739	0	0	0	0	0		0	0
303379	0	0	0	0	0		0	0
327844	0	0	0	0	0		0	0
354283	0	0	0	0	0		0	0
382853	0	0	0	0	0		0	0
413728	0	0	0	0	0		0	0
447092	0	0	0	0	0		0	0
483147	0	0	0	0	0		0	0
522109	0	0	0	0	0		0	0
564214	0	0	0	0	0		0	0
609714	0	0	0	0	0		0	0
658883	0	0	0	0	0		0	0
712017	0	0	0	0	0		0	0
769436	0	0	0	0	0		0	0
831486	0	0	0	0	0		0	0
898539	0	0	0	0	0		0	0
971000	0	0	0	0	0		0	0
1.0493e+06	0	0	0	0	0		0	0
1.13392e+06	0	0	0	0	0		0	0
1225367	0	0	0	0	0		0	0
1.32418e+06	0	0	0	0	0		0	0
1.43097e+06	0	0	0	0	0		0	0
1.54637e+06	0	0	0	0	0		0	0
1.67107e+06	0	0	0	0	0		0	0
1.80583e+06	0	0	0	0	0		0	0
1.95146e+06	0	0	0	0	0		0	0
2.10883e+06	0	0	0	0	0		0	0
2278895	0	0	0	0	0		0	0
2462672	0	0	0	0	0		0	0
2.66127e+06	0	0	0	0	0		0	0
2.87588e+06	0	0	0	0	0		0	0
3.1078e+06	0	0	0	0	0		0	0
3.35842e+06	0	0	0	0	0		0	0
3.62926e+06	0	0	0	0	0		0	0
3921933	0	0	0	0	0		0	0
4.23821e+06	0	0	0	0	0		0	0
4579992	0	0	0	0	0		0	0
4.94934e+06	0	0	0	0	0		0	0
5348466	0	0	0	0	0		0	0
5.77978e+06	0	0	0	0	0		0	0
