# Supplementary material for: Dissecting the phase separation and oligomerization activities of the carboxysome positioning protein McdB
Source: eLife. 2023 Sep 5;12:e81362. doi: 10.7554/eLife.81362 (PMC10554743; doi:10.7554/eLife.81362)
Supplement: Figure 4—source data 2. [file elife-81362-fig4-data2.xlsx]

## Sheet: raw
	200uM truncs t18hr 10peg
1			raw	sub.bak			p	s	sum	pr	sr
	P1	1	59098.5	45578.9		wt	45578.9	3352.04	48930.9	0.931495	0.0685055	1
	S1	2	16871.7	3352.04		ntd	1168.95	4457.28	5626.23	0.207768	0.792232	1
	P2	3	17158.7	1168.95		ntd.cc	34582.4	36822.5	71404.9	0.484314	0.515686	1
	S2	4	20447	4457.28		cc	11245	46596	57840.9	0.194412	0.805588	1
	P3	5	47910.3	34582.4		cc.ctd	34675.4	41754	76429.4	0.453692	0.546308	1
	S3	6	50150.4	36822.5		ctd	5327.26	13357.2	18684.4	0.285118	0.714882	1
	P4	7	26262.4	11245
	S4	8	61613.4	46596
	P5	9	49716.4	34675.4
	S5	10	56794.9	41754
	P6	11	19992.8	5327.26
	S6	12	28022.8	13357.2
	B1	13	13519.6
	B2	14	15989.7
	B3	15	13327.9
	B4	16	15017.4
	B5	17	15040.9
	B6	18	14665.6
2			raw	sub.bak			p	s	sum	pr	sr
	P1	1	52779.9	35804.5		wt	35804.5	1402.72	37207.2	0.9623	0.0377001	1
	S1	2	18378.1	1402.72		ntd	1460.8	3408.4	4869.19	0.300008	0.699992	1
	P2	3	20370.1	1460.8		ntd.cc	27813.3	27136.7	54950.1	0.506156	0.493844	1
	S2	4	22317.7	3408.4		cc	13888.6	43153.7	57042.2	0.243479	0.756521	1
	P3	5	45559.2	27813.3		cc.ctd	36341.7	37438.2	73779.9	0.49257	0.50743	1
	S3	6	44882.6	27136.7		ctd	5252.51	10935.5	16188	0.32447	0.67553	1
	P4	7	29705.8	13888.6
	S4	8	58970.9	43153.7
	P5	9	53787.3	36341.7
	S5	10	54883.7	37438.2
	P6	11	22050.8	5252.51
	S6	12	27733.7	10935.5
	B1	13	16975.4
	B2	14	18909.3
	B3	15	17745.9
	B4	16	15817.2
	B5	17	17445.5
	B6	18	16798.3
3			raw	sub.bak			p	s	sum	pr	sr
	P1	1	50122.2	33601.3		wt	33601.3	1817.24	35418.6	0.948692	0.0513077	1
	S1	2	18338.1	1817.24		ntd	1413.41	2791.22	4204.63	0.336155	0.663845	1
	P2	3	19016.9	1413.41		ntd.cc	27183.8	25161.8	52345.5	0.519314	0.480686	1
	S2	4	20394.8	2791.22		cc	9745.56	33756.5	43502.1	0.224025	0.775975	1
	P3	5	43498.2	27183.8		cc.ctd	28208.2	30105.9	58314.1	0.483728	0.516272	1
	S3	6	41476.1	25161.8		ctd	5184.07	11757.8	16941.9	0.305991	0.694009	1
	P4	7	25366.1	9745.56
	S4	8	49377.1	33756.5
	P5	9	44493.6	28208.2
	S5	10	46391.3	30105.9
	P6	11	21129.7	5184.07
	S6	12	27703.5	11757.8
	B1	13	16520.9
	B2	14	17603.5
	B3	15	16314.4
	B4	16	15620.6
	B5	17	16285.4
	B6	18	15945.6

## Sheet: to graph
	Pellet			Supernatant
	1	2	3	1	2	3
WT	0.931495	0.9623	0.948692	0.068505	0.0377	0.051308
NTD	0.207768	0.300008	0.336155	0.792232	0.699992	0.663845
CC.NTD	0.484314	0.506156	0.519314	0.515686	0.493844	0.480686
CC	0.194412	0.243479	0.224025	0.805588	0.756521	0.775975
CC.CTD	0.453692	0.49257	0.483728	0.546308	0.50743	0.516272
CTD	0.285118	0.32447	0.305991	0.714882	0.67553	0.694009
