# Supplementary material for: Dissecting the phase separation and oligomerization activities of the carboxysome positioning protein McdB
Source: eLife. 2023 Sep 5;12:e81362. doi: 10.7554/eLife.81362 (PMC10554743; doi:10.7554/eLife.81362)
Supplement: Figure 4—source data 3. [file elife-81362-fig4-data3.xlsx]

## Sheet: full-length
				FRAP										FRAP-back										FRAP/(un-b)										x-min										x/max
time	back	unbleach	un-back	1	2	3	4	5	6	7	8	9	10	1	2	3	4	5	6	7	8	9	10	1	2	3	4	5	6	7	8	9	10	1	2	3	4	5	6	7	8	9	10	1	2	3	4	5	6
0	356.799	825.968	477.271	2588.4	1196.5	932.643	624.174	1761.34	1829.04	1418.99	974.504	1044.26	1032.6	2239.7	847.801	583.946	275.477	1412.64	1480.34	1070.3	625.807	695.563	683.901	4.43767	1.6798	1.15701	0.545821	2.79896	2.93309	2.12065	1.23995	1.37817	1.35506	2.91724	0.931669	0.951843	0.417751	1.85063	2.02585	1.00003	0.979441	0.814792	1.02993	1	1	1	1	1	1
5.008	348.079	821.28	472.583	1119.36	726.283	453.808	414.386	827.979	806.587	914.277	480.336	635.855	514.623	770.66	377.586	105.111	65.6889	479.282	457.89	565.58	131.639	287.158	165.926	1.52696	0.748136	0.208263	0.130154	0.949633	0.907248	1.12062	0.260825	0.568965	0.32876	0.00652861	0	0.0030949	0.0020844	0.00130374	0	-4.66294e-15	0.000313056	0.00559142	0.00363581	0.00223794	0	0.00325148	0.00498957	0.000704485	0
10.015	349.125	823.471	474.774	1124.94	727.664	456.658	416.484	832.012	811.022	918.919	481.231	637.762	515.754	776.244	378.967	107.961	67.7869	483.315	462.325	570.222	132.534	289.065	167.057	1.53802	0.750873	0.21391	0.134311	0.957624	0.916035	1.12982	0.262598	0.572744	0.331001	0.0175926	0.00273627	0.00874179	0.00624131	0.00929459	0.00878736	0.00919751	0.00208638	0.00936989	0.00587674	0.00603055	0.00293695	0.00918407	0.0149402	0.0050224	0.00433763
15.023	348.88	823.788	475.091	1128.19	729.012	456.158	416.675	830.566	811.816	921.812	482.456	637.453	517.068	779.492	380.315	107.461	67.9779	481.869	463.119	573.115	133.759	288.756	168.371	1.54446	0.753543	0.212919	0.134689	0.954759	0.917609	1.13555	0.265025	0.572131	0.333605	0.024028	0.00540715	0.00775111	0.00661975	0.00642954	0.0103606	0.0149296	0.00451355	0.00875764	0.00848025	0.00823657	0.00580373	0.00814326	0.0158461	0.00347425	0.0051142
20.031	349.22	824.209	475.512	1127.8	730.13	456.403	416.933	832.907	813.206	919.933	482.053	637.38	516.009	779.099	381.433	107.706	68.2359	484.21	464.509	571.236	133.356	288.683	167.312	1.54368	0.755759	0.213405	0.1352	0.959398	0.920363	1.13183	0.264227	0.571987	0.331506	0.0232494	0.00762232	0.00823654	0.00713094	0.0110679	0.0131147	0.0112066	0.00371506	0.008613	0.00638198	0.00796964	0.00818136	0.00865326	0.0170698	0.00598063	0.00647368
25.038	350.704	826.054	477.356	1129.52	731.493	456.962	418.138	833.225	814.13	920.226	483.379	637.189	517.521	780.822	382.796	108.265	69.4409	484.528	465.433	571.529	134.682	288.492	168.824	1.54709	0.758459	0.214512	0.137588	0.960028	0.922193	1.13241	0.266854	0.571608	0.334502	0.0266633	0.0103229	0.00934413	0.00951849	0.011698	0.0149455	0.0117872	0.00634236	0.00823456	0.00937781	0.00913989	0.01108	0.00981688	0.0227851	0.0063211	0.00737739
30.046	348.934	822.709	474.012	1125.02	730.198	456.761	416.824	831.795	813.323	919.891	481.062	636.164	515.759	776.321	381.501	108.064	68.1269	483.098	464.626	571.194	132.365	287.467	167.062	1.53818	0.755893	0.214114	0.134984	0.957194	0.920594	1.13174	0.262263	0.569577	0.331011	0.0177451	0.00775705	0.00894587	0.00691497	0.00886464	0.0133465	0.0111234	0.00175153	0.00620366	0.00588664	0.00608285	0.00832598	0.00939848	0.0165528	0.00479007	0.00658811
35.054	348.918	823.771	475.074	1127.5	728.455	455.587	416.715	829.904	814.192	918.988	481.725	635.198	515.044	778.804	379.758	106.89	68.0179	481.207	465.495	570.291	133.028	286.501	166.347	1.5431	0.75244	0.211788	0.134768	0.953448	0.922316	1.12996	0.263577	0.567663	0.329594	0.0226649	0.00430353	0.00661975	0.006699	0.00511787	0.0150683	0.00933422	0.00306518	0.00428966	0.00446996	0.00776928	0.00461916	0.00695466	0.0160359	0.00276548	0.00743803
40.061	348.659	823.46	474.763	1123.63	729.995	455.919	416.97	831.304	812.868	919.541	481.951	635.646	514.695	774.933	381.298	107.222	68.2729	482.607	464.171	570.844	133.254	286.949	165.998	1.53543	0.755491	0.212446	0.135274	0.956221	0.919693	1.13105	0.264025	0.568551	0.328903	0.014995	0.00735484	0.00727756	0.00720425	0.00789179	0.012445	0.0104299	0.00351296	0.00517731	0.00377847	0.00514013	0.00789426	0.00764576	0.0172453	0.00426439	0.0061431
45.069	349.278	822.319	473.622	1123.69	729.216	455.357	415.95	830.279	812.094	918.158	482.277	635.175	515.17	774.989	380.519	106.66	67.2529	481.582	463.397	569.461	133.58	286.478	166.473	1.53554	0.753948	0.211332	0.133253	0.954191	0.918159	1.12831	0.264671	0.567618	0.329844	0.0151059	0.00581135	0.00616403	0.00518326	0.00586088	0.0109114	0.00768969	0.00415889	0.00424409	0.00471962	0.00517816	0.00623757	0.00647589	0.0124075	0.00316697	0.00538609
50.077	347.318	823.654	474.957	1123.19	730.737	455.114	416.057	830.423	811.864	917.038	481.827	635.717	515.604	774.489	382.04	106.417	67.3599	481.726	463.167	568.341	133.13	287.02	166.907	1.53455	0.756961	0.210851	0.133465	0.954476	0.917704	1.12609	0.263779	0.568692	0.330704	0.0141153	0.00882501	0.00568256	0.00539526	0.0061462	0.0104557	0.00547056	0.00326727	0.00531799	0.00557953	0.00483857	0.00947226	0.00597006	0.012915	0.00332115	0.00516114
55.084	348.156	824.579	475.882	1125.07	730.299	455.414	415.728	830.354	812.565	918.305	481.284	636.575	514.821	776.37	381.602	106.717	67.0309	481.657	463.868	569.608	132.587	287.878	166.124	1.53827	0.756093	0.211445	0.132813	0.954339	0.919093	1.1286	0.262703	0.570392	0.329152	0.0178422	0.00795717	0.00627697	0.00474339	0.00600949	0.0118446	0.00798095	0.00219139	0.007018	0.00402812	0.00611613	0.00854077	0.00659455	0.0113546	0.00324727	0.00584675
60.092	347.973	824.467	475.77	1123.99	730.875	455.744	415.959	828.87	813.021	916.796	481.047	635.225	514.714	775.29	382.178	107.047	67.2619	480.173	464.324	568.099	132.35	286.528	166.017	1.53613	0.757235	0.212099	0.13327	0.951399	0.919996	1.12561	0.262234	0.567717	0.32894	0.0157023	0.00909844	0.00693082	0.00520109	0.00306914	0.0127481	0.00499106	0.00172181	0.00434316	0.00381611	0.0053826	0.00976575	0.00728148	0.0124502	0.00165843	0.00629274
65.1	346.998	823.575	474.878	1123.97	729.262	454.243	415.804	827.391	812.038	916.155	481.734	634.611	514.753	775.276	380.565	105.546	67.1069	478.694	463.341	567.458	133.037	285.914	166.056	1.53611	0.754039	0.209125	0.132963	0.948468	0.918048	1.12434	0.263595	0.5665	0.329018	0.0156746	0.00590249	0.00395679	0.00489398	0.000138696	0.0108004	0.00372101	0.00308301	0.0031266	0.00389339	0.00537309	0.0063354	0.00415698	0.011715	7.49453e-05	0.00533132
70.107	348.123	824.204	475.507	1123.58	731.701	455.252	415.976	830.259	810.61	917.109	480.562	633.033	512.788	774.886	383.004	106.555	67.2789	481.562	461.913	568.412	131.865	284.336	164.091	1.53533	0.758871	0.211124	0.133304	0.954151	0.915219	1.12623	0.261273	0.563374	0.325124	0.0149019	0.010735	0.00595599	0.00523477	0.00582126	0.00797104	0.00561123	0.000760845	0	4.44089e-16	0.00510821	0.0115224	0.00625732	0.0125308	0.00314556	0.00393467
75.115	347.572	824.677	475.979	1122.25	729.736	454.875	415.78	827.321	811.663	916.436	481.17	633.448	513.96	773.549	381.039	106.178	67.0829	478.624	462.966	567.739	132.473	284.751	165.263	1.53268	0.754978	0.210377	0.132916	0.94833	0.917305	1.1249	0.262477	0.564196	0.327446	0.0122528	0.00684166	0.00520901	0.00484642	0	0.0100574	0.00427777	0.00196552	0.000822267	0.00232216	0.00420013	0.00734345	0.00547256	0.0116012	0	0.00496456
80.123	346.68	825.019	476.322	1124.52	729.917	455.107	416.409	829.697	811.198	915.962	480.303	633.904	514.189	775.827	381.22	106.41	67.7119	481	462.501	567.265	131.606	285.207	165.492	1.5372	0.755337	0.210837	0.134162	0.953037	0.916384	1.12396	0.26076	0.5651	0.3279	0.0167663	0.00720029	0.00566869	0.0060927	0.00470773	0.00913608	0.0033386	0.000247671	0.00172577	0.0027759	0.00574733	0.00772838	0.00595549	0.0145845	0.00254386	0.00450976
85.131	347.8	824.871	476.174	1123.82	731.55	454.561	416.388	829.96	812.891	917.657	480.979	634.068	514.892	775.118	382.853	105.864	67.6909	481.263	464.194	568.96	132.282	285.371	166.195	1.53579	0.758572	0.209755	0.13412	0.953559	0.919739	1.12732	0.262099	0.565424	0.329293	0.0153615	0.0104359	0.00458687	0.0060511	0.00522883	0.0124905	0.00669702	0.00158708	0.00205072	0.0041688	0.00526578	0.0112013	0.00481893	0.0144849	0.00282544	0.00616559
90.138	347.511	824.47	475.773	1122.88	730.914	453.551	415.376	828.986	812.566	916.978	480.833	634.62	514.379	774.185	382.217	104.854	66.6789	480.289	463.869	568.281	132.136	285.923	165.682	1.53394	0.757312	0.207754	0.132115	0.951629	0.919095	1.12597	0.26181	0.566518	0.328277	0.0135129	0.00917571	0.00258568	0.00404595	0.00329898	0.0118466	0.00535167	0.0012978	0.00314443	0.00315236	0.00463209	0.00984869	0.0027165	0.00968507	0.00178263	0.00584773
95.146	347.514	825.876	477.179	1122.45	729.959	454.328	416.072	830.035	814.514	919.333	481.497	634.062	516.467	773.753	381.262	105.631	67.3749	481.338	465.817	570.636	132.8	285.365	167.77	1.53309	0.75542	0.209294	0.133494	0.953707	0.922954	1.13064	0.263125	0.565413	0.332414	0.012657	0.00728351	0.00412521	0.00542498	0.00537743	0.0157063	0.0100178	0.00261342	0.00203883	0.00728945	0.00433868	0.0078177	0.00433392	0.0129862	0.00290573	0.00775296
100.154	347.805	824.894	476.197	1122.15	730.345	453.656	415.196	829.416	812.795	915.751	480.178	633.157	514.944	773.454	381.648	104.959	66.4989	480.719	464.098	567.054	131.481	284.46	166.247	1.5325	0.756185	0.207962	0.131759	0.952481	0.919548	1.12354	0.260512	0.563619	0.329396	0.0120645	0.00804831	0.00279373	0.00368931	0.00415096	0.0123003	0.00292054	0	0.00024569	0.00427183	0.0041356	0.0086386	0.00293507	0.00883134	0.002243	0.0060717
105.161	348.311	826.502	477.805	1123.25	731.746	453.427	416.279	831.427	813.604	917.805	481.467	634.788	515.521	774.556	383.049	104.73	67.5819	482.73	464.907	569.108	132.77	286.091	166.824	1.53468	0.75896	0.207508	0.133904	0.956465	0.921151	1.12761	0.263066	0.566851	0.330539	0.014248	0.0108242	0.00233999	0.00583513	0.00813549	0.0139033	0.00699026	0.00255398	0.0034773	0.00541508	0.00488407	0.0116181	0.00245838	0.0139679	0.00439608	0.00686294
110.169	347.635	825.766	477.069	1122.16	730.45	452.246	415.314	829.749	813.815	915.463	480.447	633.136	514.58	773.467	381.753	103.549	66.6169	481.052	465.118	566.766	131.75	284.439	165.883	1.53252	0.756393	0.205168	0.131992	0.95314	0.921569	1.12297	0.261045	0.563578	0.328675	0.0120903	0.00825636	0	0.00392311	0.00481076	0.0143213	0.0023499	0.000532988	0.000204081	0.00355061	0.00414443	0.0088619	0	0.00939101	0.00259953	0.00706931
115.177	347.288	825.064	476.367	1121.43	731.634	452.649	413.334	830.881	814.426	916.848	480.663	634.376	515.277	772.729	382.937	103.952	64.6369	482.184	465.729	568.151	131.966	285.679	166.58	1.53106	0.758739	0.205967	0.128069	0.955383	0.92278	1.12572	0.261473	0.566035	0.330056	0.0106281	0.0106023	0.000798491	3.60822e-16	0.00705367	0.0155319	0.0050941	0.000960963	0.00266098	0.00493162	0.00364319	0.0113799	0.00083889	8.63725e-16	0.0038115	0.00766689
120.184	347.666	829.384	480.687	1123.74	732.159	453.66	414.953	831.835	815.686	921.49	482.035	633.669	514.864	775.047	383.462	104.963	66.2559	483.138	466.989	572.793	133.338	284.972	166.167	1.53565	0.759779	0.20797	0.131277	0.957274	0.925276	1.13491	0.264191	0.564634	0.329238	0.0152209	0.0116425	0.00280165	0.00320783	0.00894389	0.0180285	0.0142916	0.0036794	0.00126015	0.00411332	0.00521756	0.0124964	0.0029434	0.00767881	0.0048329	0.00889923
125.192	347.16	828.201	479.504	1123.75	732.664	453.042	415.878	831.561	813.942	916.976	480.754	635.164	515.099	775.056	383.967	104.345	67.1809	482.864	465.245	568.279	132.057	286.467	166.402	1.53567	0.760779	0.206745	0.13311	0.956731	0.921821	1.12597	0.261653	0.567596	0.329703	0.0152387	0.0126431	0.00157717	0.0050406	0.008401	0.014573	0.00534771	0.00114127	0.00422229	0.00457894	0.00522367	0.0135704	0.00165696	0.012066	0.00453954	0.00719352
130.2	347.285	826.321	477.624	1124.06	732.12	453.294	415.443	831.216	815.501	919.929	481.793	634.682	517.161	775.359	383.423	104.597	66.7459	482.519	466.804	571.232	133.096	285.985	168.464	1.53627	0.759702	0.207245	0.132248	0.956047	0.92491	1.13182	0.263712	0.566641	0.333789	0.0158391	0.0115652	0.00207647	0.0041787	0.00771743	0.0176619	0.0111987	0.00319991	0.00326727	0.00866452	0.00542946	0.0124135	0.00218153	0.0100028	0.00417017	0.00871829
135.207	346.756	827.071	478.374	1122.97	733.407	453.901	415.308	830.254	814.129	917.76	481.374	634.923	516.573	774.273	384.71	105.204	66.6109	481.557	465.432	569.063	132.677	286.226	167.876	1.53412	0.762252	0.208447	0.131981	0.954141	0.922191	1.12752	0.262882	0.567119	0.332624	0.0136873	0.0141153	0.00327916	0.00391122	0.00581135	0.0149435	0.0069011	0.00236972	0.00374478	0.00749948	0.00469186	0.0151505	0.00344507	0.00936255	0.00314021	0.00737641
140.215	347.015	826.651	477.954	1123.32	732.411	452.793	415.578	830.324	816.413	917.442	480.626	636.146	517.102	774.618	383.714	104.096	66.8809	481.627	467.716	568.745	131.929	287.449	168.405	1.5348	0.760278	0.206252	0.132516	0.95428	0.926717	1.12689	0.2614	0.569542	0.333672	0.0143709	0.0121418	0.00108381	0.00444619	0.00595005	0.0194689	0.00627103	0.000887653	0.006168	0.00854762	0.00492618	0.0130323	0.00113864	0.0106431	0.00321515	0.00961027
145.223	348.029	827.416	478.718	1123.72	733.314	453.654	415.904	831.573	816.572	919.812	480.666	637.467	517.24	775.019	384.617	104.957	67.2069	482.876	467.875	571.115	131.969	288.77	168.543	1.5356	0.762067	0.207958	0.133161	0.956754	0.927032	1.13159	0.261479	0.572159	0.333945	0.0151654	0.013931	0.00278977	0.00509211	0.00842477	0.019784	0.0109669	0.000966907	0.00878538	0.00882105	0.00519854	0.0149527	0.00293091	0.0121893	0.00455239	0.00976578
150.23	347.63	825.508	476.811	1119.72	731.54	453.185	415.99	829.48	816.174	918.049	480.928	635.038	517.463	771.026	382.843	104.488	67.2929	480.783	467.477	569.352	132.231	286.341	168.766	1.52769	0.758552	0.207029	0.133332	0.952607	0.926243	1.1281	0.261998	0.567346	0.334387	0.00725379	0.010416	0.0018605	0.00526251	0.00427777	0.0189954	0.00747372	0.00148603	0.00397264	0.00926289	0.00248652	0.01118	0.00195463	0.0125972	0.00231153	0.00937652
155.238	347.13	826.485	477.788	1121.85	733.766	453.483	415.273	832.326	815.969	917.567	481.533	634.275	517.007	773.157	385.069	104.786	66.5759	483.629	467.272	568.87	132.836	285.578	168.31	1.53191	0.762963	0.207619	0.131911	0.958246	0.925837	1.12714	0.263197	0.565835	0.333484	0.0114761	0.0148266	0.00245095	0.00384187	0.00991674	0.0185892	0.0065187	0.00268475	0.00246086	0.00835939	0.00393388	0.015914	0.00257495	0.00919655	0.00535859	0.00917602
160.246	347.135	827.383	478.686	1119.02	731.763	453.597	415.382	832.351	815.347	918.717	480.414	634.473	514.927	770.321	383.066	104.9	66.6849	483.654	466.65	570.02	131.717	285.776	166.23	1.52629	0.758994	0.207845	0.132127	0.958296	0.924605	1.12942	0.260979	0.566227	0.329362	0.00585692	0.0108579	0.00267683	0.00405784	0.00996628	0.0173568	0.00879727	0.000467603	0.00285317	0.00423814	0.00200769	0.0116542	0.00281226	0.00971353	0.00538535	0.00856767
165.253	347.077	827.966	479.269	1123.07	734.402	453.793	415.228	833.383	816.339	919.092	481.194	635.907	517.149	774.377	385.705	105.096	66.5309	484.686	467.642	570.395	132.497	287.21	168.452	1.53433	0.764223	0.208233	0.131822	0.960341	0.92657	1.13016	0.262525	0.569068	0.333765	0.0138933	0.0160867	0.00306518	0.00375271	0.012011	0.0193223	0.00954028	0.00201307	0.00569445	0.00864074	0.0047625	0.0172666	0.00322025	0.00898312	0.00649026	0.00953789
170.261	347.511	828.496	479.799	1121.74	732.672	453.452	415.834	831.385	816.849	919.623	481.114	633.916	517.099	773.043	383.975	104.755	67.1369	482.688	468.152	570.926	132.417	285.219	168.402	1.53168	0.760795	0.207558	0.133023	0.956382	0.927581	1.13121	0.262366	0.565123	0.333666	0.0112502	0.012659	0.00238953	0.00495342	0.00805228	0.0203328	0.0105924	0.00185456	0.00174955	0.00854167	0.00385645	0.0135874	0.00251042	0.0118573	0.00435111	0.0100367
175.269	347.442	828.561	479.863	1120.56	732.836	453.413	415.434	831.636	816.083	920.425	480.79	635.382	517.491	771.861	384.139	104.716	66.7369	482.939	467.386	571.728	132.093	286.685	168.794	1.52934	0.76112	0.207481	0.13223	0.956879	0.926063	1.1328	0.261724	0.568028	0.334443	0.00890823	0.0129839	0.00231226	0.00416087	0.0085496	0.0188151	0.0121814	0.0012126	0.00465423	0.00931837	0.00305365	0.0139362	0.00242924	0.00996016	0.00461984	0.00928751
180.276	347.034	829.485	480.788	1121.64	734.503	454.924	416.663	832.299	817.505	919.828	480.669	636.627	517.845	772.948	385.806	106.227	67.9659	483.602	468.808	571.131	131.972	287.93	169.148	1.53149	0.764423	0.210474	0.134665	0.958193	0.928881	1.13162	0.261485	0.570495	0.335144	0.011062	0.0162868	0.0053061	0.00659597	0.00986325	0.0216326	0.0109986	0.000972851	0.00712103	0.0100198	0.00379193	0.0174814	0.00557456	0.0157892	0.00532968	0.0106783
185.284	347.784	830.031	481.334	1122.57	735.079	454.242	416.669	832.767	818.495	922.022	480.509	636.726	517.142	773.877	386.382	105.545	67.9719	484.07	469.798	573.325	131.812	288.029	168.445	1.53333	0.765564	0.209123	0.134677	0.95912	0.930842	1.13597	0.261168	0.570691	0.333751	0.0129027	0.0174281	0.00395481	0.00660786	0.0107905	0.0235941	0.0153457	0.000655833	0.00731719	0.00862687	0.0044229	0.0187063	0.0041549	0.0158177	0.00583074	0.0116466
190.292	348.359	829.996	481.299	1123.79	735.682	455.186	416.677	833.521	818.836	922.327	482.626	638.37	519.265	775.096	386.985	106.489	67.9799	484.824	470.139	573.63	133.929	289.673	170.568	1.53575	0.766759	0.210994	0.134693	0.960614	0.931518	1.13657	0.265362	0.573948	0.337958	0.015318	0.0186229	0.00582522	0.00662371	0.0122845	0.0242698	0.01595	0.00485039	0.0105746	0.0128333	0.00525084	0.0199887	0.00611994	0.0158556	0.00663801	0.0119801
195.299	347.61	827.922	479.224	1121.88	734.582	454.207	415.975	832.475	816.733	920.195	481.688	637.278	519.089	773.188	385.885	105.51	67.2779	483.778	468.036	571.498	132.991	288.581	170.392	1.53197	0.76458	0.209054	0.133302	0.958542	0.927351	1.13235	0.263504	0.571785	0.337609	0.0115375	0.0164434	0.00388546	0.00523279	0.010212	0.020103	0.0117257	0.00299186	0.0084109	0.0124846	0.00395494	0.0176494	0.00408204	0.0125261	0.00551811	0.00992324
200.307	347.401	829.704	481.007	1125.12	735.238	454.495	417.104	834.524	818.556	921.25	481.453	637.346	518.407	776.418	386.541	105.798	68.4069	485.827	469.859	572.553	132.756	288.649	169.71	1.53837	0.765879	0.209624	0.135539	0.962601	0.930963	1.13444	0.263038	0.571919	0.336258	0.0179373	0.0177431	0.0044561	0.00746975	0.0142718	0.023715	0.0138161	0.00252624	0.00854564	0.0111333	0.00614873	0.0190445	0.00468154	0.0178809	0.00771187	0.0117062
205.315	347.589	828.346	479.649	1122.62	734.398	453.638	417.115	834.078	818.764	920.639	480.263	636.241	517.209	773.926	385.701	104.941	68.4179	485.381	470.067	571.942	131.566	287.544	168.512	1.53343	0.764215	0.207926	0.135561	0.961718	0.931375	1.13323	0.26068	0.56973	0.333884	0.0129998	0.0160788	0.00275806	0.00749155	0.0133881	0.0241271	0.0126055	0.000168416	0.00635623	0.00875963	0.00445618	0.0172581	0.0028976	0.017933	0.00723436	0.0119097
210.322	346.949	829.18	480.482	1123.81	735.723	455.273	417.037	832.506	819.624	922.874	482.657	636.095	520.124	775.111	387.026	106.576	68.3399	483.809	470.927	574.177	133.96	287.398	171.427	1.53578	0.76684	0.211166	0.135406	0.958603	0.933079	1.13766	0.265424	0.569441	0.33966	0.0153477	0.0187041	0.0059976	0.007337	0.0102734	0.0258311	0.0170338	0.00491181	0.00606695	0.0145353	0.00526102	0.0200759	0.00630104	0.0175631	0.0055513	0.0127508
215.33	347.668	830.586	481.889	1124.08	735.854	454.721	417.927	836.071	820.707	922.701	482.791	635.893	521.37	775.384	387.157	106.024	69.2299	487.374	472.01	574.004	134.094	287.196	172.673	1.53632	0.7671	0.210072	0.13717	0.965667	0.935225	1.13731	0.265689	0.56904	0.342128	0.0158886	0.0189637	0.00490388	0.00910042	0.017337	0.0279769	0.016691	0.00517731	0.00566671	0.0170041	0.00544644	0.0203545	0.00515199	0.0217843	0.00936816	0.01381
220.338	347.995	830.29	481.593	1121.29	735.604	454.127	417.85	835.404	820.37	922.902	481.654	635.769	519.373	772.591	386.907	105.43	69.1529	486.707	471.673	574.205	132.957	287.072	170.676	1.53079	0.766605	0.208895	0.137017	0.964345	0.934557	1.13771	0.263436	0.568795	0.338172	0.0103546	0.0184683	0.00372695	0.00894785	0.0160154	0.0273092	0.0170893	0.0029245	0.00542102	0.0130473	0.00354946	0.0198228	0.00391551	0.0214191	0.00865404	0.0134804
225.346	346.928	829.05	480.352	1119.85	734.614	454.604	417.904	836.055	818.304	922.42	481.189	636.037	519.448	771.148	385.917	105.907	69.2069	487.358	469.607	573.723	132.492	287.34	170.751	1.52793	0.764643	0.20984	0.137124	0.965635	0.930464	1.13676	0.262515	0.569326	0.33832	0.00749551	0.0165068	0.00467206	0.00905485	0.0173053	0.0232157	0.0161343	0.00200316	0.00595203	0.0131959	0.00256938	0.0177174	0.00490844	0.0216752	0.00935103	0.0114598
230.353	347.074	828.241	479.544	1122.13	735.809	454.319	417.566	834.926	819.868	922.104	482.189	635.561	520.7	773.436	387.112	105.622	68.8689	486.229	471.171	573.407	133.492	286.864	172.003	1.53246	0.767011	0.209276	0.136454	0.963398	0.933563	1.13613	0.264496	0.568383	0.340801	0.0120289	0.0188745	0.00410737	0.00838515	0.0150683	0.0263145	0.0155082	0.00398453	0.0050089	0.0156766	0.00412338	0.0202588	0.00431518	0.0200721	0.00814227	0.0129894
235.361	347.524	827.39	478.693	1119.62	735.486	455.136	418.027	837.664	819.431	922.243	481.673	635.237	521.676	770.92	386.789	106.439	69.3299	488.967	470.734	573.546	132.976	286.54	172.979	1.52748	0.766371	0.210894	0.137368	0.968823	0.932697	1.13641	0.263474	0.567741	0.342735	0.00704376	0.0182345	0.00572615	0.00929856	0.0204933	0.0254487	0.0157836	0.00296214	0.00436693	0.0176104	0.00241453	0.0195719	0.00601586	0.0222586	0.0110737	0.012562
240.369	347.367	826.285	477.588	1118.01	734.701	454.207	417.883	834.708	820.231	920.635	481.567	636.152	519.07	769.313	386.004	105.51	69.1859	486.011	471.534	571.938	132.87	287.455	170.373	1.52429	0.764815	0.209054	0.137083	0.962966	0.934282	1.13322	0.263264	0.569554	0.337571	0.0038597	0.0166792	0.00388546	0.00901324	0.0146364	0.0270338	0.0125975	0.00275212	0.00617988	0.0124469	0.00132307	0.0179024	0.00408204	0.0215756	0.00790887	0.0133444
245.376	348.129	829.082	480.385	1121.43	736.046	455.772	419.567	838.025	821.057	921.627	482.37	638.007	520.339	772.729	387.349	107.075	70.8699	489.328	472.36	572.93	133.673	289.31	171.642	1.53106	0.76748	0.212155	0.140419	0.969538	0.935918	1.13518	0.264855	0.573229	0.340086	0.0106281	0.0193441	0.0069863	0.0123499	0.0212086	0.0286704	0.0145631	0.00434316	0.00985532	0.0149613	0.00364319	0.0207628	0.00733976	0.0295627	0.0114602	0.0141523
250.384	348.207	830.186	481.488	1120.31	737.497	456.323	419.658	836.11	821.512	922.501	483.751	636.388	520.422	771.612	388.8	107.626	70.9609	487.413	472.815	573.804	135.054	287.691	171.725	1.52885	0.770355	0.213246	0.1406	0.965744	0.93682	1.13692	0.267591	0.570021	0.34025	0.00841487	0.0222191	0.00807803	0.0125302	0.0174142	0.0295719	0.0162948	0.00707943	0.00664749	0.0151258	0.00288453	0.0238487	0.00848673	0.0299943	0.00940991	0.0145973
255.392	348.363	831.384	482.687	1118.48	736.181	457.402	420.266	837.792	823.011	924.32	483.541	638.062	521.521	769.779	387.484	108.705	71.5689	489.095	474.314	575.623	134.844	289.365	172.824	1.52521	0.767748	0.215384	0.141804	0.969077	0.93979	1.14052	0.267175	0.573338	0.342428	0.00478302	0.0196116	0.0102159	0.0137348	0.0207469	0.032542	0.0198989	0.00666334	0.0099643	0.0173033	0.00163957	0.0210499	0.0107328	0.032878	0.0112107	0.0160634
260.399	347.501	829.933	481.235	1117.67	736.777	456.948	419.304	837.944	821.268	922.087	481.757	635.948	520.243	768.973	388.08	108.251	70.6069	489.247	472.571	573.39	133.06	287.251	171.546	1.52362	0.768929	0.214485	0.139898	0.969378	0.936336	1.1361	0.26364	0.569149	0.339895	0.00318604	0.0207925	0.00931639	0.0118288	0.0210481	0.0290885	0.0154745	0.00312858	0.00577569	0.0147711	0.00109214	0.0223175	0.00978774	0.0283153	0.0113735	0.0143587
265.407	348.873	832.179	483.481	1119.5	736.756	456.785	420.313	836.28	822.476	924.885	481.93	638.701	519.994	770.803	388.059	108.088	71.6159	487.583	473.779	576.188	133.233	290.004	171.297	1.52724	0.768887	0.214162	0.141897	0.966081	0.93873	1.14164	0.263983	0.574604	0.339402	0.00681194	0.0207509	0.00899343	0.013828	0.0177511	0.0314819	0.0210183	0.00347136	0.0112304	0.0142777	0.00233506	0.0222728	0.00944844	0.0331009	0.00959192	0.0155402
270.415	348.11	831.712	483.015	1120.61	736.35	457.782	420.167	837.99	822.921	923.882	482.854	638.507	520.796	771.915	387.653	109.085	71.4699	489.293	474.224	575.185	134.157	289.81	172.099	1.52945	0.768083	0.216137	0.141608	0.969469	0.939612	1.13965	0.265814	0.57422	0.340991	0.00901522	0.0199464	0.0109688	0.0135387	0.0211392	0.0323637	0.019031	0.00530214	0.010846	0.0158668	0.00309033	0.0214094	0.0115238	0.0324085	0.0114227	0.0159754
275.422	348.342	832.893	484.196	1119.49	737.929	456.976	420.505	839.16	824.308	922.51	483.015	638.141	521.797	770.793	389.232	108.279	71.8079	490.463	475.611	573.813	134.318	289.444	173.1	1.52722	0.771211	0.21454	0.142278	0.971787	0.94236	1.13693	0.266133	0.573495	0.342974	0.00679213	0.023075	0.00937187	0.0142084	0.0234574	0.0351118	0.0163126	0.00562114	0.0101208	0.0178501	0.00232827	0.0247674	0.00984602	0.0340116	0.0126754	0.0173319
280.43	348.768	834.203	485.506	1119.98	737.376	457.129	422.14	840.065	826.912	924.084	481.839	637.501	521.521	771.281	388.679	108.432	73.4429	491.368	478.215	575.387	133.142	288.804	172.824	1.52819	0.770116	0.214843	0.145517	0.97358	0.947519	1.14005	0.263803	0.572227	0.342428	0.00775903	0.0219793	0.00967502	0.0174479	0.0252505	0.0402713	0.0194313	0.00329105	0.00885275	0.0173033	0.00265972	0.0235913	0.0101645	0.0417663	0.0136443	0.0198788
285.438	348.504	833.607	484.91	1120.43	738.321	459.447	421.284	839.868	824.484	924.098	484.084	638.26	522.186	771.732	389.624	110.75	72.5869	491.171	475.787	575.401	135.387	289.563	173.489	1.52908	0.771988	0.219436	0.143821	0.97319	0.942709	1.14008	0.268251	0.57373	0.343745	0.00865263	0.0238517	0.0142678	0.0157519	0.0248602	0.0354605	0.019459	0.00773922	0.0103566	0.0186209	0.00296603	0.0256011	0.0149897	0.0377063	0.0134334	0.0175041
290.445	348.556	834.568	485.871	1119.26	739.496	458.375	421.479	839.257	823.344	924.105	484.428	638.456	524.334	770.559	390.799	109.678	72.7819	490.56	474.647	575.408	135.731	289.759	175.637	1.52676	0.774316	0.217312	0.144208	0.971979	0.94045	1.14009	0.268933	0.574119	0.348001	0.00632849	0.0261798	0.0121438	0.0161382	0.0236496	0.0332018	0.0194729	0.00842081	0.010745	0.0228769	0.00216934	0.0280999	0.0127582	0.0386312	0.0127792	0.0163891
295.453	348.785	834.683	485.985	1120.69	737.927	458.551	421.445	838.375	824.06	924.74	483.889	637.91	522.88	771.991	389.23	109.854	72.7479	489.678	475.363	576.043	135.192	289.213	174.183	1.5296	0.771207	0.217661	0.14414	0.970232	0.941868	1.14135	0.267865	0.573037	0.34512	0.00916581	0.023071	0.0124925	0.0160709	0.021902	0.0346204	0.020731	0.00735285	0.00966313	0.019996	0.00314194	0.0247631	0.0131246	0.0384699	0.0118349	0.0170894
300.461	348.949	835.749	487.052	1120.21	740.015	458.878	421.69	843.782	826.684	926.55	484.359	639.679	524.293	771.509	391.318	110.181	72.9929	495.085	477.987	577.853	135.662	290.982	175.596	1.52864	0.775344	0.218309	0.144626	0.980945	0.947068	1.14494	0.268796	0.576542	0.34792	0.00821079	0.0272081	0.0131404	0.0165563	0.0326153	0.0398195	0.0243173	0.0082841	0.0131682	0.0227956	0.00281457	0.0292037	0.0138052	0.0396319	0.0176239	0.0196558
305.468	349.459	836.37	487.673	1121.52	739.414	460.027	422.484	840.847	826.651	926.827	484.466	639.012	524.747	772.825	390.717	111.33	73.7869	492.15	477.954	578.13	135.769	290.315	176.05	1.53125	0.774154	0.220585	0.146199	0.97513	0.947002	1.14549	0.269008	0.57522	0.348819	0.0108183	0.0260173	0.015417	0.0181295	0.0268	0.0397542	0.0248662	0.0084961	0.0118466	0.0236952	0.00370839	0.0279255	0.016197	0.0433978	0.0144816	0.0196235
310.476	349.326	835.35	486.653	1120.62	739.617	459.237	421.761	841.452	826.8	926.124	483.778	639.726	524.089	771.923	390.92	110.54	73.0639	492.755	478.103	577.427	135.081	291.029	175.392	1.52946	0.774556	0.21902	0.144766	0.976328	0.947297	1.14409	0.267645	0.576635	0.347516	0.00903107	0.0264196	0.0138517	0.016697	0.0279987	0.0400494	0.0234733	0.00713292	0.0132613	0.0223914	0.00309576	0.0283572	0.0145525	0.0399687	0.0151293	0.0197692
315.484	349.79	835.946	487.249	1120.69	739.794	459.694	422.301	840.439	827.294	927.25	483.66	640.222	523.459	771.998	391.097	110.997	73.6039	491.742	478.597	578.553	134.963	291.525	174.762	1.52961	0.774907	0.219926	0.145836	0.974321	0.948276	1.14633	0.267411	0.577618	0.346267	0.00917967	0.0267703	0.0147572	0.0177669	0.0259916	0.0410282	0.0257043	0.00689912	0.014244	0.0211432	0.0031467	0.0287337	0.0155038	0.0425299	0.0140447	0.0202524
320.491	349.615	838.099	489.402	1120.28	740.401	460.191	423.959	842.744	828.39	926.197	484.25	640.309	524.68	771.581	391.704	111.494	75.2619	494.047	479.693	577.5	135.553	291.612	175.983	1.52879	0.776109	0.22091	0.149121	0.978888	0.950448	1.14424	0.26858	0.57779	0.348687	0.00835344	0.0279729	0.015742	0.021052	0.0305586	0.0431998	0.0236179	0.00806813	0.0144164	0.0235624	0.00286347	0.0300246	0.0165384	0.0503937	0.0165126	0.0213243
325.499	349.324	837.646	488.949	1121.08	740.654	460.429	423.202	842.315	827.573	928.243	482.633	641.111	523.297	772.387	391.957	111.732	74.5049	493.618	478.876	579.546	133.936	292.414	174.6	1.53038	0.776611	0.221382	0.147621	0.978038	0.948829	1.14829	0.265376	0.579379	0.345946	0.00995043	0.0284742	0.0162135	0.0195521	0.0297086	0.041581	0.0276718	0.00486426	0.0160055	0.0208222	0.0034109	0.0305626	0.0170338	0.0468033	0.0160533	0.0205252
330.507	349.767	838.788	490.091	1118.37	741.092	459.979	423.628	843.36	827.598	925.712	483.645	639.513	522.945	769.674	392.395	111.282	74.9309	494.663	478.901	577.015	134.948	290.816	174.248	1.52501	0.777478	0.22049	0.148466	0.980109	0.948879	1.14328	0.267381	0.576213	0.345249	0.00457498	0.0293421	0.0153219	0.0203962	0.0317792	0.0416305	0.0226569	0.0068694	0.0128393	0.0201247	0.00156826	0.0314941	0.0160971	0.0488238	0.0171721	0.0205497
335.514	349.832	839.203	490.506	1122.81	740.921	459.998	424.471	844.031	830.516	929.487	483.006	642.142	524.993	774.117	392.224	111.301	75.7739	495.334	481.819	580.79	134.309	293.445	176.296	1.53381	0.77714	0.220528	0.150136	0.981438	0.95466	1.15076	0.266115	0.581422	0.349307	0.0133782	0.0290033	0.0153596	0.0220665	0.0331086	0.0474121	0.0301366	0.00560331	0.0180483	0.0241826	0.00458591	0.0311304	0.0161367	0.052822	0.0178905	0.0234036
340.522	349.596	839.433	490.735	1118.97	740.61	460.607	424.372	843.422	828.403	927.469	484.225	641.53	524.864	770.269	391.913	111.91	75.6749	494.725	479.706	578.772	135.528	292.833	176.167	1.52619	0.776523	0.221735	0.14994	0.980232	0.950474	1.14676	0.26853	0.580209	0.349051	0.00575389	0.0283871	0.0165662	0.0218703	0.031902	0.0432255	0.0261382	0.00801859	0.0168357	0.023927	0.00197237	0.030469	0.0174044	0.0523525	0.0172385	0.021337
345.53	350.378	838.011	489.314	1116.06	741.22	460.053	424.35	843.914	827.721	928.737	483.435	642.228	525.086	767.365	392.523	111.356	75.6529	495.217	479.024	580.04	134.738	293.531	176.389	1.52043	0.777732	0.220637	0.149896	0.981207	0.949122	1.14927	0.266965	0.581592	0.349491	-4.21885e-15	0.0295957	0.0154685	0.0218267	0.0328768	0.0418742	0.0286506	0.00645331	0.0182187	0.0243669	-1.44618e-15	0.0317663	0.0162511	0.0522482	0.0177652	0.02067
350.538	350.871	838.888	490.191	1118.7	742.335	461.089	424.918	845.598	831.273	929.638	484.84	642.639	525.957	770	393.638	112.392	76.2209	496.901	482.576	580.941	136.143	293.942	177.26	1.52565	0.779941	0.22269	0.151022	0.984543	0.95616	1.15106	0.269749	0.582407	0.351217	0.0052209	0.0318049	0.0175212	0.0229522	0.0362135	0.048912	0.0304358	0.00923713	0.019033	0.0260926	0.00178967	0.0341376	0.0184077	0.0549421	0.0195682	0.024144
355.545	350.462	839.589	490.892	1122.64	742.78	461.901	425.986	846.413	832.256	932.186	485.928	643.663	527.618	773.941	394.083	113.204	77.2889	497.716	483.559	583.489	137.231	294.966	178.921	1.53346	0.780823	0.224298	0.153138	0.986158	0.958108	1.15611	0.271905	0.584436	0.354508	0.0130295	0.0326866	0.0191301	0.0250683	0.0378283	0.0508597	0.0354843	0.0113929	0.0210619	0.0293837	0.00446637	0.035084	0.020098	0.0600076	0.0204408	0.0251054
360.553	350.33	839.522	490.825	1120.56	742.939	461.171	425.301	845.938	831.125	929.392	485.747	642.342	528.064	771.862	394.242	112.474	76.6039	497.241	482.428	580.695	137.05	293.645	179.367	1.52934	0.781138	0.222852	0.15178	0.985217	0.955867	1.15057	0.271546	0.581818	0.355392	0.00891021	0.0330017	0.0176837	0.023711	0.0368871	0.0486188	0.0299484	0.0110342	0.0184445	0.0302674	0.00305433	0.0354221	0.0185784	0.0567587	0.0199322	0.0239993
365.561	350.746	840.549	491.851	1120.24	742.48	460.643	426.798	843.108	830.577	928.714	485.331	642.509	526.868	771.547	393.783	111.946	78.1009	494.411	481.88	580.017	136.634	293.812	178.171	1.52872	0.780228	0.221806	0.154746	0.97961	0.954781	1.14923	0.270722	0.582149	0.353022	0.00828608	0.0320922	0.0166375	0.0266771	0.0312798	0.047533	0.028605	0.01021	0.0187754	0.0278977	0.00284038	0.0344459	0.0174793	0.0638589	0.0169023	0.0234633
370.568	350.763	839.46	490.763	1120.37	743.171	462.29	426.981	846.088	834.145	929.904	485.391	642.209	527.203	771.67	394.474	113.593	78.2839	497.391	485.448	581.207	136.694	293.512	178.506	1.52896	0.781598	0.225069	0.155109	0.985514	0.961851	1.15158	0.270841	0.581555	0.353686	0.00852979	0.0334613	0.0199009	0.0270397	0.0371843	0.0546025	0.0309628	0.0103289	0.018181	0.0285614	0.00292392	0.0359155	0.0209077	0.0647268	0.0200928	0.026953
375.576	349.89	838.599	489.902	1121.07	743.733	461.766	426.921	845.534	830.768	931.692	485.59	641.358	526.663	772.371	395.036	113.069	78.2239	496.837	482.071	582.995	136.893	292.661	177.966	1.53035	0.782711	0.224031	0.15499	0.984416	0.955159	1.15513	0.271235	0.579869	0.352616	0.00991873	0.0345749	0.0188626	0.0269208	0.0360866	0.0479114	0.0345055	0.0107232	0.0164949	0.0274915	0.00340004	0.0371107	0.0198169	0.0644422	0.0194997	0.0236501
380.584	350.975	840.242	491.545	1121.42	743.293	461.748	428.821	846.263	832.164	930.411	485.785	642.425	527.704	772.72	394.596	113.051	80.1239	497.566	483.467	581.714	137.088	293.728	179.007	1.53104	0.781839	0.223995	0.158755	0.985861	0.957925	1.15259	0.271621	0.581983	0.354678	0.0106102	0.0337031	0.018827	0.0306854	0.0375311	0.0506774	0.0319674	0.0111095	0.018609	0.0295541	0.00363707	0.0361749	0.0197795	0.0734538	0.0202802	0.0250155
385.591	350.57	840.809	492.112	1121.87	743.608	462.365	426.551	846.367	830.692	931.815	485.021	642.762	527.568	773.17	394.911	113.668	77.8539	497.67	481.995	583.118	136.324	294.065	178.871	1.53193	0.782463	0.225218	0.154257	0.986067	0.955009	1.15537	0.270108	0.58265	0.354409	0.0115018	0.0343272	0.0200495	0.0261877	0.0377371	0.0477609	0.0347492	0.00959576	0.0192767	0.0292846	0.00394271	0.0368448	0.0210638	0.0626873	0.0203915	0.0235758
390.599	351.46	841.018	492.321	1122.38	744.251	462.54	427.432	847.541	833.486	928.775	485.617	641.68	527.513	773.682	395.554	113.843	78.7349	498.844	484.789	580.078	136.92	292.983	178.816	1.53295	0.783737	0.225565	0.156003	0.988393	0.960545	1.14935	0.271289	0.580507	0.3543	0.0125163	0.0356012	0.0203962	0.0279333	0.0400632	0.0532968	0.0287259	0.0107767	0.0171329	0.0291756	0.00429046	0.0382123	0.0214281	0.0668659	0.0216485	0.0263084
395.607	350.55	840.968	492.271	1121.15	744.445	463.314	427.706	847.262	833.828	930.908	485.873	643.413	529.376	772.449	395.748	114.617	79.0089	498.565	485.131	582.211	137.176	294.716	180.679	1.5305	0.784122	0.227098	0.156546	0.98784	0.961222	1.15357	0.271796	0.58394	0.357991	0.0100733	0.0359856	0.0219298	0.0284762	0.0395104	0.0539744	0.0329521	0.0112839	0.0205666	0.0328669	0.00345301	0.0386249	0.0230393	0.0681654	0.0213498	0.0266429
400.614	351.473	842.403	493.706	1120.58	744.561	463.836	428.357	848.063	834.588	930.877	486.833	644.149	530.59	771.887	395.864	115.139	79.6599	499.366	485.891	582.18	138.136	295.452	181.893	1.52939	0.784352	0.228132	0.157835	0.989427	0.962728	1.15351	0.273698	0.585399	0.360397	0.00895974	0.0362154	0.022964	0.0297661	0.0410975	0.0554803	0.0328907	0.013186	0.0220249	0.0352723	0.00307131	0.0388716	0.0241259	0.0712531	0.0222074	0.0273862
405.622	351.599	843.145	494.448	1120.44	745.395	464.51	428.501	846.919	835.145	932.089	486.553	644.432	529.975	771.748	396.698	115.813	79.8039	498.222	486.448	583.392	137.856	295.735	181.278	1.52912	0.786004	0.229468	0.158121	0.987161	0.963832	1.15591	0.273143	0.585959	0.359178	0.00868433	0.0378679	0.0242995	0.0300514	0.0388308	0.0565839	0.0352921	0.0126312	0.0225856	0.0340538	0.0029769	0.0406452	0.0255289	0.0719361	0.0209825	0.027931
410.63	351.145	843.245	494.548	1119.32	746.553	463.065	428.071	847.979	835.32	931.837	486.065	644.676	529.3	770.623	397.856	114.368	79.3739	499.282	486.623	583.14	137.368	295.979	180.603	1.52689	0.788299	0.226605	0.157269	0.989261	0.964179	1.15541	0.272176	0.586443	0.357841	0.00645529	0.0401623	0.0214364	0.0291994	0.0409311	0.0569306	0.0347928	0.0116643	0.0230691	0.0327163	0.00221281	0.0431079	0.022521	0.0698966	0.0221174	0.0281022
415.637	350.452	842.371	493.674	1121.66	745.279	464.478	427.706	847.769	834.654	932.552	486.334	643.438	529.849	772.961	396.582	115.781	79.0089	499.072	485.957	583.855	137.637	294.741	181.152	1.53152	0.785774	0.229404	0.156546	0.988845	0.962859	1.15683	0.272709	0.58399	0.358928	0.0110877	0.0376381	0.0242361	0.0284762	0.040515	0.055611	0.0362095	0.0121973	0.0206161	0.0338041	0.00380076	0.0403985	0.0254623	0.0681654	0.0218926	0.0274508
420.645	350.671	845.17	496.472	1121.23	746.471	465.969	428.63	850.071	835.697	930.565	486.093	644.306	528.703	772.531	397.774	117.272	79.9329	501.374	487	581.868	137.396	295.609	180.006	1.53067	0.788136	0.232359	0.158376	0.993406	0.964926	1.15289	0.272232	0.58571	0.356658	0.0102357	0.0399998	0.0271903	0.030307	0.0450761	0.0576776	0.0322725	0.0117198	0.022336	0.0315335	0.00350871	0.0429336	0.028566	0.0725479	0.0243572	0.0284709
425.653	351.917	845.273	496.576	1122.73	746.671	465.855	428.041	849.655	836.489	930.546	486.886	644.53	530.473	774.029	397.974	117.158	79.3439	500.958	487.792	581.849	138.189	295.833	181.776	1.53364	0.788532	0.232133	0.157209	0.992582	0.966495	1.15286	0.273803	0.586154	0.360165	0.0132038	0.0403961	0.0269644	0.02914	0.0442519	0.0592468	0.0322349	0.013291	0.0227798	0.0350405	0.00452614	0.0433589	0.0283287	0.0697543	0.0239118	0.0292455
430.66	351.293	845.027	496.33	1122.13	748.344	465.83	428.154	850.11	839.675	933.191	487.561	646.447	531.805	773.432	399.647	117.133	79.4569	501.413	490.978	584.494	138.864	297.75	183.108	1.53245	0.791847	0.232083	0.157433	0.993483	0.972807	1.1581	0.27514	0.589952	0.362804	0.012021	0.0437109	0.0269149	0.0293639	0.0451534	0.0655595	0.0374756	0.0146284	0.0265781	0.0376797	0.00412066	0.0469168	0.0282766	0.0702903	0.024399	0.0323615
435.668	351.223	845.082	496.385	1120.32	746.119	464.71	428.993	849.767	837.454	930.584	487.814	644.417	532.084	771.624	397.422	116.013	80.2959	501.07	488.757	581.887	139.117	295.72	183.387	1.52887	0.787439	0.229864	0.159096	0.992803	0.968407	1.15293	0.275642	0.58593	0.363357	0.00843864	0.0393024	0.0246958	0.0310262	0.0444738	0.0611589	0.0323102	0.0151297	0.0225559	0.0382325	0.00289268	0.042185	0.0259452	0.0742696	0.0240317	0.0301893
440.676	351.314	846.096	497.399	1122.68	747.904	465.367	428.354	847.644	837.473	932.469	487.299	645.541	532.49	773.986	399.207	116.67	79.6569	498.947	488.776	583.772	138.602	296.844	183.793	1.53355	0.790975	0.231166	0.157829	0.988597	0.968445	1.15667	0.274621	0.588157	0.364161	0.0131186	0.0428391	0.0259975	0.0297601	0.0402673	0.0611965	0.036045	0.0141093	0.0247829	0.0390369	0.00449693	0.0459811	0.0273128	0.0712389	0.0217588	0.0302079
445.683	351.912	846.358	497.661	1125.55	748.885	466.583	430.024	852.065	837.851	934.055	487.515	647.154	532.51	776.85	400.188	117.886	81.3269	503.368	489.154	585.358	138.818	298.457	183.813	1.53922	0.792919	0.233575	0.161138	0.997357	0.969193	1.15981	0.275049	0.591353	0.364201	0.0187933	0.0447829	0.0284069	0.033069	0.049027	0.0619455	0.0391875	0.0145373	0.0279789	0.0390765	0.00644214	0.0480674	0.0298441	0.0791596	0.0264921	0.0305776
450.691	352.133	845.682	496.984	1122.86	747.777	466.664	429.623	851.624	837.888	933.777	487.053	647.166	531.744	774.158	399.08	117.967	80.9259	502.927	489.191	585.08	138.356	298.469	183.047	1.53389	0.790724	0.233736	0.160344	0.996483	0.969267	1.15926	0.274134	0.591376	0.362683	0.0134594	0.0425875	0.0285674	0.0322745	0.0481532	0.0620188	0.0386367	0.0136219	0.0280027	0.0375588	0.00461375	0.045711	0.0300127	0.0772576	0.0260199	0.0306138
455.699	351.426	844.037	495.34	1123.49	748.344	466.887	429.648	850.33	839.877	932.87	487.51	647.432	530.876	774.794	399.647	118.19	80.9509	501.633	491.18	584.173	138.813	298.735	182.179	1.53515	0.791847	0.234178	0.160393	0.993919	0.973208	1.15746	0.275039	0.591903	0.360963	0.0147196	0.0437109	0.0290092	0.032324	0.0455893	0.0659597	0.0368396	0.0145274	0.0285297	0.035839	0.00504572	0.0469168	0.0304769	0.0773762	0.0246345	0.0325591
460.706	351.971	846.86	498.163	1124.19	748.356	466.777	428.986	851.984	839.845	933.651	486.988	646.62	531.83	775.492	399.659	118.08	80.2889	503.287	491.148	584.954	138.291	297.923	183.133	1.53653	0.791871	0.23396	0.159082	0.997196	0.973144	1.15901	0.274005	0.590295	0.362853	0.0161026	0.0437347	0.0287912	0.0310124	0.0488665	0.0658963	0.038387	0.0134931	0.0269208	0.0377292	0.0055198	0.0469424	0.0302479	0.0742364	0.0264054	0.0325278
465.714	351.556	848.856	500.159	1124.9	749.734	468.187	429.474	854.006	841.965	934.031	487.919	646.796	532.536	776.204	401.037	119.49	80.7769	505.309	493.268	585.334	139.222	298.099	183.839	1.53794	0.794601	0.236753	0.160049	1.0012	0.977345	1.15976	0.27585	0.590643	0.364252	0.0175133	0.046465	0.031585	0.0319793	0.0528728	0.0700968	0.0391399	0.0153378	0.0272696	0.039128	0.00600338	0.0498729	0.033183	0.0765509	0.0285702	0.0346013
470.722	352.345	849.085	500.388	1123.28	750.742	468.912	429.55	852.656	841.969	936.927	488.686	648.192	533.823	774.587	402.045	120.215	80.8529	503.959	493.272	588.23	139.989	299.495	185.126	1.53474	0.796599	0.23819	0.160199	0.998528	0.977353	1.1655	0.277369	0.593409	0.366802	0.0143094	0.0484623	0.0330215	0.0321299	0.0501979	0.0701047	0.044878	0.0168575	0.0300355	0.0416781	0.00490513	0.0520166	0.0346921	0.0769114	0.0271248	0.0346052
475.729	351.799	848.437	499.739	1126.57	749.711	469.176	429.251	855.156	843.598	935.41	489.056	647.509	534.391	777.873	401.014	120.479	80.5539	506.459	494.901	586.713	140.359	298.812	185.694	1.54125	0.794556	0.238713	0.159607	1.00348	0.98058	1.16249	0.278102	0.592056	0.367928	0.0208202	0.0464195	0.0335445	0.0315374	0.0551514	0.0733324	0.0418722	0.0175906	0.0286823	0.0428035	0.00713695	0.049824	0.0352417	0.0754933	0.0298014	0.0361984
480.737	352.721	848.114	499.417	1125.28	750.277	469.314	430.197	854.68	842.282	934.589	488.874	647.855	535.463	776.581	401.58	120.617	81.4999	505.983	493.585	585.892	140.177	299.158	186.766	1.53869	0.795677	0.238986	0.161481	1.00254	0.977973	1.16087	0.277742	0.592742	0.370052	0.0182603	0.0475409	0.033818	0.0334118	0.0542082	0.0707249	0.0402455	0.01723	0.0293678	0.0449275	0.00625944	0.0510277	0.0355289	0.0799801	0.0292918	0.0349113
485.745	351.883	848.994	500.297	1124.71	750.006	469.876	430.133	856.309	842.803	939.376	488.462	649.018	535.136	776.009	401.309	121.179	81.4359	507.612	494.106	590.679	139.765	300.321	186.439	1.53756	0.79514	0.2401	0.161354	1.00577	0.979005	1.17035	0.276926	0.595046	0.369404	0.0171269	0.047004	0.0349315	0.033285	0.0574359	0.0717572	0.0497303	0.0164136	0.0316722	0.0442796	0.00587094	0.0504514	0.0366988	0.0796765	0.0310359	0.0354209
490.753	352.124	850.118	501.421	1126.53	752.13	471.15	430.416	858.929	844.104	939.158	489.463	650.93	535.219	777.834	403.433	122.453	81.7189	510.232	495.407	590.461	140.766	302.233	186.522	1.54117	0.799349	0.242624	0.161915	1.01096	0.981583	1.16992	0.278909	0.598834	0.369568	0.0207429	0.0512124	0.0374558	0.0338457	0.0626271	0.074335	0.0492984	0.018397	0.0354605	0.0444441	0.00711046	0.0549685	0.0393508	0.0810188	0.033841	0.0366933
495.76	352.534	848.66	499.963	1126.95	749.851	469.316	430.022	856.676	842.592	935.03	489.379	649.396	534.176	778.253	401.154	120.619	81.3249	507.979	493.895	586.333	140.682	300.699	185.479	1.542	0.794833	0.23899	0.161134	1.00649	0.978587	1.16174	0.278742	0.595795	0.367502	0.0215731	0.0466969	0.0338219	0.0330651	0.058163	0.0713391	0.0411193	0.0182306	0.0324211	0.0423775	0.00739505	0.0501218	0.0355331	0.0791501	0.0314288	0.0352145
500.768	352.584	849.547	500.849	1126.14	752.007	469.799	429.906	856.622	845.449	937.109	488.885	649.67	535.379	777.442	403.31	121.102	81.2089	507.925	496.752	588.412	140.188	300.973	186.682	1.5404	0.799105	0.239947	0.160905	1.00639	0.984248	1.16586	0.277764	0.596338	0.369885	0.0199662	0.0509687	0.0347789	0.0328352	0.058056	0.0769999	0.0452386	0.0172518	0.032964	0.0447611	0.00684422	0.0547069	0.0365385	0.0785999	0.031371	0.0380088
505.776	352.86	850.443	501.746	1127.5	751.404	469.835	430.171	856.687	843.922	936.53	488.701	648.101	535.22	778.802	402.707	121.138	81.4739	507.99	495.225	587.833	140.004	299.404	186.523	1.54309	0.79791	0.240019	0.16143	1.00651	0.981222	1.16471	0.277399	0.593229	0.36957	0.0226609	0.0497739	0.0348503	0.0333603	0.0581848	0.0739744	0.0440914	0.0168872	0.0298552	0.044446	0.00776792	0.0534245	0.0366135	0.0798568	0.0314406	0.0365153
510.783	352.39	849.888	501.191	1129.65	750.705	470.706	430.551	855.975	843.983	937.317	489.293	650.814	536.259	780.952	402.008	122.009	81.8539	507.278	495.286	588.62	140.596	302.117	187.562	1.54735	0.796525	0.241744	0.162183	1.0051	0.981343	1.16627	0.278572	0.598604	0.371629	0.0269208	0.048389	0.036576	0.0341132	0.0567741	0.0740952	0.0456507	0.0180602	0.0352307	0.0465047	0.00922819	0.0519379	0.0384266	0.0816591	0.0306783	0.036575
515.791	352.452	851.679	502.981	1129.06	752.703	470.743	430.065	858.769	845.03	938.666	489.962	650.987	536.686	780.364	404.006	122.046	81.3679	510.072	496.333	589.969	141.265	302.29	187.989	1.54619	0.800484	0.241818	0.16122	1.01064	0.983418	1.16895	0.279898	0.598947	0.372475	0.0257558	0.0523477	0.0366494	0.0331503	0.06231	0.0761697	0.0483236	0.0193857	0.0355735	0.0473507	0.00882882	0.0561871	0.0385036	0.079354	0.0336697	0.037599
520.799	352.084	851.536	502.839	1126.27	752.345	471.017	430.266	856.089	844.916	937.791	490.564	650.459	536.235	777.571	403.648	122.32	81.5689	507.392	496.219	589.094	141.867	301.762	187.538	1.54065	0.799775	0.242361	0.161618	1.00533	0.983192	1.16721	0.28109	0.597901	0.371581	0.0202218	0.0516384	0.0371922	0.0335485	0.057	0.0759438	0.0465899	0.0205785	0.0345273	0.0464571	0.00693184	0.0554257	0.0390739	0.0803073	0.0308004	0.0374875
525.806	352.623	853.084	504.387	1129.08	752.588	472.655	431.65	858.443	845.68	939.148	490.314	651.578	537.47	780.378	403.891	123.958	82.9529	509.746	496.983	590.451	141.617	302.881	188.773	1.54622	0.800256	0.245606	0.16436	1.00999	0.984706	1.1699	0.280595	0.600118	0.374028	0.0257835	0.0521199	0.0404377	0.0362907	0.0616641	0.0774576	0.0492786	0.0200831	0.0367445	0.0489041	0.00883833	0.0559425	0.0424836	0.0868716	0.0333207	0.0382347
530.814	353.681	854.084	505.387	1129.81	752.747	472.747	431.494	858.654	847.665	937.564	490.283	652.933	538.293	781.109	404.05	124.05	82.7969	509.957	498.968	588.867	141.586	304.236	189.596	1.54766	0.800571	0.245788	0.164051	1.01041	0.988639	1.16676	0.280534	0.602803	0.375659	0.0272319	0.0524349	0.04062	0.0359816	0.0620822	0.0813906	0.0461401	0.0200217	0.0394292	0.0505348	0.00933482	0.0562806	0.0426751	0.0861317	0.0335466	0.0401761
535.822	353.413	853.717	505.02	1129.98	754.849	473.87	430.383	858.614	848.526	939.633	490.839	652.433	539.077	781.287	406.152	125.173	81.6859	509.917	499.829	590.936	142.142	303.736	190.38	1.54802	0.804736	0.248013	0.16185	1.01033	0.990345	1.17086	0.281635	0.601812	0.377212	0.0275846	0.0565997	0.0428451	0.0337803	0.0620029	0.0830966	0.0502396	0.0211234	0.0384385	0.0520882	0.00945572	0.0607509	0.0450128	0.0808623	0.0335037	0.0410182
540.829	353.078	854.559	505.862	1129.9	755.68	474.042	430.502	859.756	849.11	940.016	489.935	654.049	536.938	781.207	406.983	125.345	81.8049	511.059	500.413	591.319	141.238	305.352	188.241	1.54786	0.806383	0.248354	0.162085	1.0126	0.991502	1.17162	0.279844	0.605014	0.372974	0.0274261	0.0582463	0.0431859	0.0340161	0.0642657	0.0842537	0.0509984	0.0193322	0.0416404	0.04785	0.00940138	0.0625182	0.0453708	0.0814267	0.0347264	0.0415894
545.837	352.186	852.1	503.403	1129.5	753.866	475.089	431.593	859.828	847.318	940.568	489.925	653.97	536.893	780.806	405.169	126.392	82.8959	511.131	498.621	591.871	141.228	305.273	188.196	1.54706	0.802788	0.250429	0.164247	1.01274	0.987951	1.17271	0.279824	0.604858	0.372885	0.0266316	0.0546521	0.0452604	0.0361778	0.0644083	0.0807031	0.0520921	0.0193124	0.0414839	0.0477609	0.00912902	0.0586604	0.0475503	0.0866012	0.0348035	0.0398367
550.845	352.965	853.234	504.537	1128.56	753.948	475.041	431.172	860.794	848.236	940.203	491.905	652.643	538.701	779.864	405.251	126.344	82.4749	512.097	499.539	591.506	143.208	303.946	190.004	1.5452	0.802951	0.250334	0.163413	1.01465	0.98977	1.17199	0.283747	0.602228	0.376467	0.0247651	0.0548145	0.0451653	0.0353436	0.0663223	0.082522	0.0513689	0.0232355	0.0388546	0.0513432	0.00848922	0.0588348	0.0474503	0.0846044	0.0358378	0.0407346
555.852	353.163	855.599	506.902	1131.78	755.584	476.398	432.622	860.685	849.014	941.648	492.435	654.118	540.833	783.081	406.887	127.701	83.9249	511.988	500.317	592.951	143.738	305.421	192.136	1.55157	0.806192	0.253022	0.166286	1.01444	0.991311	1.17485	0.284797	0.605151	0.380692	0.0311392	0.058056	0.047854	0.0382166	0.0661063	0.0840635	0.054232	0.0242856	0.0417771	0.0555674	0.0106742	0.062314	0.0502751	0.0914817	0.0357211	0.0414955
560.86	352.746	857.184	508.487	1131.32	755.654	476.077	433.066	863.504	849.489	940.484	491.833	653.422	540.573	782.618	406.957	127.38	84.3689	514.807	500.792	591.787	143.136	304.725	191.876	1.55065	0.806331	0.252386	0.167166	1.02002	0.992253	1.17255	0.283605	0.603772	0.380177	0.0302218	0.0581947	0.047218	0.0390963	0.0716918	0.0850046	0.0519257	0.0230928	0.0403981	0.0550523	0.0103597	0.0624629	0.0496069	0.0935876	0.0387392	0.0419601
565.868	352.668	853.835	505.138	1131.08	755.194	475.669	432.783	861.289	848.452	941.033	490.979	654.13	540.297	782.386	406.497	126.972	84.0859	512.592	499.755	592.336	142.282	305.433	191.6	1.55019	0.80542	0.251578	0.166605	1.01563	0.990198	1.17363	0.281913	0.605175	0.37963	0.0297621	0.0572833	0.0464096	0.0385356	0.0673031	0.0829499	0.0530135	0.0214007	0.0418009	0.0545054	0.0102021	0.0614846	0.0487576	0.0922453	0.0363677	0.0409458
570.875	353.349	853.303	504.605	1129.69	756.34	475.851	432.413	862	850.614	942.963	491.253	654.978	540.947	780.992	407.643	127.154	83.7159	513.303	501.917	594.266	142.556	306.281	192.25	1.54743	0.80769	0.251938	0.165872	1.01704	0.994482	1.17746	0.282456	0.606855	0.380918	0.0270001	0.059554	0.0467702	0.0378025	0.0687118	0.0872337	0.0568375	0.0219436	0.0434811	0.0557933	0.00925535	0.0639218	0.0491364	0.0904904	0.037129	0.0430604
575.883	352.789	854.579	505.882	1128.52	755.727	475.515	431.594	861.757	850.945	942.636	492.05	653.917	541.503	779.824	407.03	126.818	82.8969	513.06	502.248	593.939	143.353	305.22	192.806	1.54512	0.806476	0.251273	0.164249	1.01656	0.995138	1.17681	0.284035	0.604753	0.382019	0.0246859	0.0583394	0.0461044	0.0361798	0.0682304	0.0878895	0.0561896	0.0235228	0.0413789	0.056895	0.00846206	0.0626182	0.048437	0.086606	0.0368688	0.0433841
580.891	353.566	856.989	508.292	1130.71	756.35	476.108	432.96	862.795	853.084	940.808	492.46	655.932	540.601	782.009	407.653	127.411	84.2629	514.098	504.387	592.111	143.763	307.235	191.904	1.54945	0.80771	0.252448	0.166956	1.01862	0.999376	1.17319	0.284847	0.608745	0.380232	0.0290151	0.0595738	0.0472794	0.0388863	0.070287	0.0921276	0.0525677	0.0243352	0.0453713	0.0551078	0.00994609	0.0639431	0.0496714	0.0930848	0.0379801	0.0454762
585.898	353	854.037	505.34	1131.65	755.644	474.767	433.1	862.35	853.251	941.635	492.118	654.636	541.645	782.955	406.947	126.07	84.4029	513.653	504.554	592.938	143.421	305.939	192.948	1.55132	0.806311	0.249791	0.167233	1.01773	0.999707	1.17483	0.284169	0.606177	0.382301	0.0308895	0.0581749	0.0446224	0.0391637	0.0694053	0.0924585	0.0542062	0.0236575	0.0428035	0.0571763	0.0105886	0.0624416	0.04688	0.0937488	0.0375037	0.0456395
590.906	352.601	856.934	508.237	1130.14	756.385	474.449	432.656	864.445	852.243	941.698	492.148	655.015	540.57	781.446	407.688	125.752	83.9589	515.748	503.546	593.001	143.451	306.318	191.873	1.54833	0.807779	0.249161	0.166353	1.02189	0.997709	1.17495	0.284229	0.606928	0.380171	0.0278996	0.0596431	0.0439923	0.038284	0.0735563	0.0904613	0.0543311	0.023717	0.0435544	0.0550463	0.00956371	0.0640175	0.046218	0.091643	0.0397467	0.0446536
595.914	353.304	857.694	508.997	1132.28	756.785	473.67	433.516	865.092	853.005	945.189	493.146	655.913	541.988	783.584	408.088	124.973	84.8189	516.395	504.308	596.492	144.449	307.216	193.291	1.55257	0.808572	0.247617	0.168057	1.02317	0.999219	1.18187	0.286206	0.608707	0.38298	0.0321358	0.0604357	0.0424488	0.039988	0.0748382	0.0919711	0.061248	0.0256944	0.0453337	0.0578559	0.0110158	0.0648682	0.0445964	0.0957219	0.0404394	0.0453989
600.921	352.918	855.818	507.121	1131.5	755.452	473.283	432.323	863.042	852.065	943.22	493.098	654.682	541.944	782.804	406.755	124.586	83.6259	514.345	503.368	594.523	144.401	305.985	193.247	1.55102	0.805931	0.24685	0.165694	1.01911	0.997357	1.17797	0.286111	0.606268	0.382893	0.0305903	0.0577945	0.041682	0.0376242	0.0707764	0.0901086	0.0573467	0.0255993	0.0428946	0.0577687	0.0104861	0.0620333	0.0437909	0.0900636	0.0382446	0.0444795
605.929	353.421	854.771	506.074	1132.75	757.835	474.181	433.141	863.236	855.031	945.024	493.521	656.389	542.467	784.057	409.138	125.484	84.4439	514.539	506.334	596.327	144.824	307.692	193.77	1.5535	0.810652	0.24863	0.167314	1.01949	1.00323	1.18154	0.286949	0.609651	0.383929	0.033073	0.0625161	0.0434613	0.0392449	0.0711608	0.0959854	0.0609211	0.0264374	0.0462768	0.058805	0.0113371	0.0671012	0.0456602	0.0939433	0.0384523	0.0473804
610.937	352.517	856.546	507.849	1130.67	755.667	472.659	432.315	862.97	855.821	941.093	492.433	655.395	541.935	781.973	406.97	123.962	83.6179	514.273	507.124	592.396	143.736	306.698	193.238	1.54938	0.806357	0.245614	0.165678	1.01896	1.0048	1.17375	0.284794	0.607681	0.382875	0.0289438	0.0582205	0.0404457	0.0376083	0.0706338	0.0975506	0.0531323	0.0242817	0.0443073	0.0577509	0.00992164	0.0624906	0.0424919	0.0900256	0.0381675	0.0481531
615.944	351.85	857.812	509.115	1132.52	755.466	472.153	432.421	864.602	853.882	943.818	491.885	654.506	541.109	783.827	406.769	123.456	83.7239	515.905	505.185	595.121	143.188	305.809	192.412	1.55305	0.805959	0.244611	0.165888	1.0222	1.00096	1.17915	0.283708	0.60592	0.381239	0.0326173	0.0578222	0.0394431	0.0378184	0.0738674	0.0937088	0.0585316	0.0231959	0.0425459	0.0561143	0.0111809	0.0620631	0.0414386	0.0905284	0.0399148	0.0462566
620.952	352.354	854.718	506.021	1131.51	755.898	472.242	431.696	863.888	853.493	942.978	492.728	655.685	543.256	782.809	407.201	123.545	82.9989	515.191	504.796	594.281	144.031	306.988	194.559	1.55103	0.806814	0.244788	0.164451	1.02078	1.00019	1.17749	0.285378	0.608256	0.385493	0.0306002	0.0586782	0.0396194	0.0363819	0.0724527	0.092938	0.0568672	0.0248662	0.0448819	0.0603683	0.0104894	0.0629818	0.0416239	0.0870897	0.0391503	0.0458762
625.96	352.684	857.579	508.882	1133.06	758.494	473.909	432.634	865.133	855.302	944.893	493.57	656.981	544.136	784.361	409.797	125.212	83.9369	516.436	506.605	596.196	144.873	308.284	195.439	1.55411	0.811958	0.248091	0.16631	1.02325	1.00377	1.18128	0.287046	0.610824	0.387236	0.0336753	0.0638218	0.0429224	0.0382404	0.0749195	0.0965223	0.0606615	0.0265345	0.0474498	0.0621119	0.0115436	0.0685027	0.045094	0.0915386	0.0404833	0.0476455
630.967	353.344	859.051	510.353	1133.18	759.292	473.699	432.504	865.475	857.717	946.064	495.465	658.024	545.04	784.479	410.595	125.002	83.8069	516.778	509.02	597.367	146.768	309.327	196.343	1.55434	0.813539	0.247675	0.166052	1.02393	1.00856	1.1836	0.290801	0.61289	0.389027	0.0339091	0.065403	0.0425063	0.0379828	0.0755971	0.101307	0.0629817	0.0302892	0.0495164	0.0639031	0.0116237	0.0701998	0.0446568	0.090922	0.0408495	0.0500074
635.975	352.383	855.012	506.315	1130.76	757.123	473.305	430.974	864.196	855.666	944.192	492.775	656.435	543.016	782.065	408.426	124.608	82.2769	515.499	506.969	595.495	144.078	307.738	194.319	1.54956	0.809242	0.246894	0.163021	1.02139	1.00449	1.17989	0.285471	0.609742	0.385017	0.0291261	0.0611054	0.0417256	0.0349513	0.0730629	0.0972435	0.0592726	0.0249593	0.046368	0.0598928	0.00998413	0.065587	0.0438367	0.0836653	0.0394801	0.0480015
640.983	352.109	855.926	507.228	1130.46	755.948	472.654	431.367	866.753	854.686	945.312	493.056	658.484	543.38	781.762	407.251	123.957	82.6699	518.056	505.989	596.615	144.359	309.787	194.683	1.54896	0.806914	0.245604	0.163799	1.02646	1.00255	1.18211	0.286028	0.613802	0.385738	0.0285257	0.0587773	0.0404357	0.03573	0.0781293	0.0953018	0.0614917	0.025516	0.0504278	0.060614	0.00977833	0.0630882	0.0424815	0.0855293	0.0422177	0.047043
645.991	351.823	856.944	508.247	1131.01	757.691	473.453	431.706	864.71	856.952	946.297	493.442	658.929	543.957	782.309	408.994	124.756	83.0089	516.013	508.255	597.6	144.745	310.232	195.26	1.55004	0.810367	0.247187	0.164471	1.02241	1.00704	1.18406	0.286793	0.614683	0.386881	0.0296096	0.0622308	0.0420189	0.0364017	0.0740813	0.0997916	0.0634434	0.0262809	0.0513095	0.0617572	0.0101499	0.066795	0.0441447	0.0871372	0.0400304	0.0492592
650.998	351.414	856.305	507.607	1131.55	757.423	473.107	431.017	866.583	855.667	946.667	494.657	656.976	545.388	782.849	408.726	124.41	82.3199	517.886	506.97	597.97	145.96	308.279	196.691	1.55111	0.809836	0.246502	0.163106	1.02612	1.00449	1.1848	0.2892	0.610814	0.389717	0.0306795	0.0616998	0.0413333	0.0350365	0.0777924	0.0972455	0.0641765	0.0286882	0.0474399	0.0645926	0.0105166	0.066225	0.0434245	0.0838693	0.0420357	0.0480024
656.006	352.202	856.771	508.074	1133.02	756.969	472.983	431.413	867.138	856.532	946.578	495.109	658.286	546.383	784.322	408.272	124.286	82.7159	518.441	507.835	597.881	146.412	309.589	197.686	1.55403	0.808937	0.246256	0.16389	1.02722	1.00621	1.18462	0.290096	0.613409	0.391688	0.033598	0.0608002	0.0410876	0.0358211	0.0788921	0.0989594	0.0640001	0.0295838	0.0500355	0.066564	0.0115171	0.0652595	0.0431664	0.0857475	0.0426299	0.0488484
661.014	350.819	858.219	509.522	1131.88	757.398	472.914	430.971	868.52	856.935	947.169	496.254	658.975	549.189	783.18	408.701	124.217	82.2739	519.823	508.238	598.472	147.557	310.278	200.492	1.55177	0.809787	0.246119	0.163015	1.02996	1.00701	1.18579	0.292364	0.614774	0.397248	0.0313353	0.0616502	0.0409509	0.0349454	0.0816304	0.0997579	0.0651711	0.0318525	0.0514006	0.0721238	0.0107414	0.0661719	0.0430227	0.0836511	0.0441096	0.0492426
666.021	351.877	856.601	507.904	1134.01	759.419	473.356	430.612	868.532	856.088	947.762	495.262	659.068	545.87	785.316	410.722	124.659	81.9149	519.835	507.391	599.065	146.565	310.371	197.173	1.556	0.813791	0.246995	0.162303	1.02998	1.00533	1.18697	0.290399	0.614959	0.390672	0.0355675	0.0656546	0.0418267	0.0342341	0.0816541	0.0980797	0.0663461	0.0298869	0.0515849	0.0655476	0.0121922	0.0704699	0.0439428	0.0819484	0.0441224	0.0484142
671.029	351.182	856.226	507.529	1131.55	758.912	472.225	430.978	866.935	857.617	943.891	495.201	657.93	546.229	782.85	410.215	123.528	82.2809	518.238	508.92	595.194	146.504	309.233	197.532	1.55111	0.812786	0.244754	0.163029	1.02682	1.00836	1.1793	0.290278	0.612704	0.391383	0.0306815	0.06465	0.0395857	0.0349592	0.0784899	0.101109	0.0586762	0.0297661	0.0493301	0.0662589	0.0105173	0.0693917	0.0415885	0.0836843	0.0424126	0.0499096
676.037	350.44	858.087	509.39	1133.03	757.937	472.413	430.942	867.551	858.074	944.457	494.568	659.401	546.746	784.337	409.24	123.716	82.2449	518.854	509.377	595.76	145.871	310.704	198.049	1.55406	0.810854	0.245127	0.162957	1.02804	1.00926	1.18042	0.289024	0.615618	0.392408	0.0336278	0.0627182	0.0399582	0.0348879	0.0797104	0.102015	0.0597977	0.0285119	0.0522447	0.0672833	0.0115273	0.0673181	0.0419799	0.0835136	0.0430721	0.0503566
681.044	351.594	857.469	508.772	1133.35	759.964	472.968	430.976	870.741	861.172	947.704	496.836	660.126	547.118	784.655	411.267	124.271	82.2789	522.044	512.475	599.007	148.139	311.429	198.421	1.55469	0.814871	0.246226	0.163025	1.03436	1.0154	1.18685	0.293517	0.617055	0.393145	0.0342578	0.0667344	0.0410579	0.0349553	0.086031	0.108153	0.0662312	0.0330056	0.0536812	0.0680203	0.0117432	0.0716289	0.0431352	0.0836748	0.0464875	0.0533866
686.052	350.725	857.823	509.126	1135.11	758.357	472.556	432.072	868.321	861.236	948.021	496.297	659.935	547.043	786.417	409.66	123.859	83.3749	519.624	512.539	599.324	147.6	311.238	198.346	1.55818	0.811687	0.24541	0.165196	1.02957	1.01553	1.18748	0.29245	0.616677	0.392996	0.037749	0.0635504	0.0402416	0.0371269	0.0812361	0.10828	0.0668593	0.0319377	0.0533027	0.0678717	0.01294	0.0682114	0.0422775	0.0888731	0.0438965	0.0534492
691.06	350.576	856.984	508.287	1132.42	758.738	472.824	431.325	870.077	860.882	947.055	494.648	660.053	547.611	783.719	410.041	124.127	82.6279	521.38	512.185	598.358	145.951	311.356	198.914	1.55283	0.812442	0.245941	0.163716	1.03305	1.01483	1.18557	0.289182	0.61691	0.394121	0.0324033	0.0643053	0.0407726	0.0356468	0.0847153	0.107578	0.0649453	0.0286704	0.0535365	0.0689972	0.0111075	0.0690216	0.0428354	0.0853301	0.0457766	0.0531029
696.067	351.651	858.808	510.11	1134.12	759.273	472.538	431.197	869.964	861.192	946.047	497.065	660.922	548.343	785.427	410.576	123.841	82.4999	521.267	512.495	597.35	148.368	312.225	199.646	1.55622	0.813502	0.245374	0.163463	1.03282	1.01544	1.18357	0.293971	0.618632	0.395572	0.0357875	0.0653653	0.0402059	0.0353932	0.0844914	0.108193	0.062948	0.0334594	0.0552584	0.0704475	0.0122676	0.0701594	0.0422401	0.084723	0.0456556	0.0534061
701.075	351.213	859.12	510.423	1133.95	758.916	473.199	432.635	870.646	861.872	947.478	496.723	660.191	549.254	785.254	410.219	124.502	83.9379	521.949	513.175	598.781	148.026	311.494	200.557	1.55588	0.812794	0.246684	0.166312	1.03417	1.01679	1.1864	0.293294	0.617184	0.397377	0.0354447	0.064658	0.0415156	0.0382424	0.0858427	0.10954	0.0657834	0.0327817	0.05381	0.0722525	0.0121501	0.0694002	0.043616	0.0915434	0.0463858	0.0540712
706.083	351.691	861.958	513.261	1136.26	759.15	473.491	432.677	873.356	864.596	949.408	497.222	660.617	549.823	787.565	410.453	124.794	83.9799	524.659	515.899	600.711	148.525	311.92	201.126	1.56046	0.813258	0.247262	0.166395	1.03954	1.02219	1.19023	0.294282	0.618028	0.398504	0.0400236	0.0651216	0.0420941	0.0383256	0.0912122	0.114937	0.0696074	0.0337704	0.054654	0.0733799	0.0137197	0.0698978	0.0442238	0.0917426	0.0492872	0.0567354
711.09	351.646	861.192	512.495	1136.18	758.886	473.345	430.498	870.403	864.262	948.216	497.392	661.133	550.033	787.482	410.189	124.648	81.8009	521.706	515.565	599.519	148.695	312.436	201.336	1.56029	0.812735	0.246973	0.162078	1.03369	1.02152	1.18787	0.294619	0.61905	0.39892	0.0398592	0.0645985	0.0418049	0.0340082	0.0853613	0.114275	0.0672456	0.0341073	0.0556764	0.073796	0.0136633	0.0693364	0.0439199	0.0814077	0.0461256	0.0564087
716.098	351.225	860.879	512.182	1135.36	758.176	472.581	430.495	871.027	863.149	948.969	497.114	660.108	550.55	786.667	409.479	123.884	81.7979	522.33	514.452	600.272	148.417	311.411	201.853	1.55868	0.811328	0.245459	0.162072	1.03493	1.01932	1.18936	0.294068	0.617019	0.399945	0.0382444	0.0631917	0.0402911	0.0340022	0.0865976	0.11207	0.0687376	0.0335564	0.0536455	0.0748204	0.0131098	0.0678264	0.0423296	0.0813935	0.0467937	0.0553202
721.106	351.943	862.965	514.268	1135.14	759.68	472.969	432.071	871.211	864.107	949.456	497.516	662.274	549.883	786.442	410.983	124.272	83.3739	522.514	515.41	600.759	148.819	313.577	201.186	1.55823	0.814308	0.246228	0.165194	1.03529	1.02122	1.19032	0.294865	0.621311	0.398623	0.0377985	0.0661717	0.0410599	0.0371249	0.0869622	0.113968	0.0697025	0.0343529	0.0579372	0.0734988	0.012957	0.071025	0.0431372	0.0888683	0.0469907	0.0562571
726.113	350.334	861.558	512.86	1135.27	759.437	472.763	429.767	871.795	864.234	950.504	498.05	660.638	550.362	786.577	410.74	124.066	81.0699	523.098	515.537	601.807	149.353	311.941	201.665	1.5585	0.813827	0.24582	0.160629	1.03645	1.02147	1.1924	0.295923	0.618069	0.399572	0.038066	0.0656903	0.0406517	0.0325598	0.0881193	0.11422	0.071779	0.035411	0.0546956	0.0744479	0.0130486	0.0705082	0.0427084	0.0779406	0.0476159	0.0563814
731.121	351.169	863.419	514.721	1136.58	759.985	474.163	431.62	874.112	865.226	950.617	497.115	661.888	549.317	787.878	411.288	125.466	82.9229	525.415	516.529	601.92	148.418	313.191	200.62	1.56108	0.814912	0.248594	0.164301	1.04104	1.02343	1.19262	0.29407	0.620546	0.397502	0.0406438	0.066776	0.0434256	0.0362313	0.0927102	0.116185	0.0720029	0.0335584	0.0571724	0.0723774	0.0139323	0.0716736	0.0456227	0.0867293	0.0500966	0.0573516
736.129	350.458	864.356	515.659	1135.11	759.937	473.849	431.814	874.971	865.293	952.99	497.766	663.948	550.886	786.41	411.24	125.152	83.1169	526.274	516.596	604.293	149.069	315.251	202.189	1.55817	0.814817	0.247972	0.164685	1.04274	1.02357	1.19733	0.29536	0.624628	0.40061	0.0377351	0.0666809	0.0428035	0.0366157	0.0944122	0.116318	0.0767047	0.0348483	0.061254	0.0754861	0.0129352	0.0715715	0.0449691	0.0876494	0.0510163	0.0574171
741.136	351.019	864.284	515.587	1134.87	760.275	473.154	431.342	875.402	866.52	952.698	497.896	663.797	550.831	786.168	411.578	124.457	82.6449	526.705	517.823	604.001	149.199	315.1	202.134	1.55769	0.815487	0.246595	0.16375	1.0436	1.026	1.19675	0.295618	0.624329	0.400501	0.0372557	0.0673506	0.0414264	0.0356805	0.0952661	0.118749	0.0761261	0.0351059	0.0609548	0.0753772	0.0127709	0.0722903	0.0435223	0.0854107	0.0514778	0.0586172
746.144	350.825	862.886	514.189	1133.93	759.007	473.625	432.004	875.371	865.68	950.453	498.022	661.55	550.401	785.236	410.31	124.928	83.3069	526.674	516.983	601.756	149.325	312.853	201.704	1.55584	0.812975	0.247528	0.165061	1.04353	1.02433	1.1923	0.295867	0.619876	0.399649	0.035409	0.0648383	0.0423597	0.0369921	0.0952047	0.117085	0.0716779	0.0353555	0.0565027	0.0745252	0.0121378	0.0695937	0.0445028	0.0885506	0.0514446	0.0577956
751.152	351.566	863.405	514.708	1134.32	758.819	474.54	431.767	875.711	866.435	953.336	499.278	663.491	553.275	785.62	410.122	125.843	83.0699	527.014	517.738	604.639	150.581	314.794	204.578	1.5566	0.812602	0.249341	0.164592	1.04421	1.02583	1.19801	0.298356	0.623722	0.405344	0.0361699	0.0644658	0.0441726	0.0365225	0.0958784	0.118581	0.0773902	0.0378441	0.0603485	0.0802196	0.0123987	0.0691939	0.0464075	0.0874265	0.0518086	0.058534
756.159	352.029	863.363	514.666	1137.9	760.878	472.952	431.658	874.259	868.829	953.294	498.399	665.938	553.738	789.205	412.181	124.255	82.9609	525.562	520.132	604.597	149.702	317.241	205.041	1.5637	0.816682	0.246195	0.164376	1.04133	1.03057	1.19793	0.296614	0.628571	0.406261	0.0432731	0.0685454	0.0410262	0.0363066	0.0930014	0.123324	0.077307	0.0361025	0.0651969	0.081137	0.0148336	0.0735727	0.0431019	0.0869095	0.050254	0.0608755
761.167	351.324	864.255	515.558	1135.63	760.356	473.412	430.862	874.969	867.95	952.746	498.521	664.152	552.611	786.933	411.659	124.715	82.1649	526.272	519.253	604.049	149.824	315.455	203.914	1.5592	0.815647	0.247106	0.162799	1.04274	1.02883	1.19684	0.296856	0.625032	0.404028	0.0387714	0.0675111	0.0419376	0.0347294	0.0944082	0.121583	0.0762212	0.0363442	0.0616582	0.078904	0.0132904	0.0724626	0.0440594	0.0831341	0.0510142	0.0600158
766.175	350.71	860.358	511.661	1132.81	760.543	473.337	429.86	874.749	867.686	953.303	497.145	663.824	550.722	784.109	411.846	124.64	81.1629	526.052	518.989	604.606	148.448	315.127	202.025	1.55361	0.816018	0.246957	0.160813	1.0423	1.02831	1.19795	0.29413	0.624382	0.400285	0.033176	0.0678816	0.041789	0.0327441	0.0939723	0.12106	0.0773248	0.0336179	0.0610083	0.0751612	0.0113724	0.0728603	0.0439033	0.0783817	0.0507786	0.0597576
771.182	351.768	863.811	515.113	1134.08	762.978	474.069	431.464	875.774	870.04	953.266	498.215	664.392	551.29	785.387	414.281	125.372	82.7669	527.077	521.343	604.569	149.518	315.695	202.593	1.55614	0.820843	0.248408	0.163992	1.04433	1.03297	1.19787	0.29625	0.625507	0.401411	0.0357082	0.0727063	0.0432394	0.0359222	0.0960032	0.125724	0.0772515	0.0357379	0.0621337	0.0762866	0.0122404	0.0780388	0.045427	0.0859894	0.051876	0.0620599
776.19	351.465	862.637	513.94	1134.8	760.841	473.501	430.46	874.954	870.484	953.033	498.812	662.553	552.738	786.105	412.144	124.804	81.7629	526.257	521.787	604.336	150.115	313.856	204.041	1.55756	0.816608	0.247282	0.162002	1.04271	1.03385	1.19741	0.297433	0.621864	0.40428	0.0371308	0.0684721	0.042114	0.0339329	0.0943785	0.126603	0.0767899	0.0369208	0.05849	0.0791556	0.0127281	0.073494	0.0442447	0.0812275	0.0509981	0.0624941
781.198	351.145	863.077	514.38	1134.83	761.841	474.333	432.061	877.434	871.182	954.692	499.512	665.041	554.223	786.134	413.144	125.636	83.3639	528.737	522.485	605.995	150.815	316.344	205.526	1.55762	0.81859	0.248931	0.165174	1.04762	1.03523	1.2007	0.29882	0.626793	0.407222	0.0371883	0.0704535	0.0437625	0.0371051	0.0992923	0.127986	0.080077	0.0383078	0.0634196	0.082098	0.0127478	0.0756207	0.0459766	0.0888209	0.0536533	0.0631768
786.206	351.594	864.347	515.65	1135.4	760.371	474.696	432.727	878.766	871.545	954.777	499.657	665.118	554.76	786.701	411.674	125.999	84.0299	530.069	522.848	606.08	150.96	316.421	206.063	1.55874	0.815677	0.24965	0.166494	1.05026	1.03595	1.20087	0.299107	0.626946	0.408286	0.0383117	0.0675409	0.0444817	0.0384247	0.101931	0.128706	0.0802454	0.0385951	0.0635722	0.083162	0.0131329	0.0724945	0.0467322	0.0919797	0.0550794	0.0635318
791.213	350.7	864.04	515.343	1134.29	762.203	474.565	431.829	882.088	872.029	954.151	498.712	665.093	554.851	785.59	413.506	125.868	83.1319	533.391	523.332	605.454	150.015	316.396	206.154	1.55654	0.819307	0.24939	0.164715	1.05684	1.03691	1.19963	0.297235	0.626896	0.408467	0.0361104	0.0711707	0.0442221	0.0366454	0.108514	0.129665	0.079005	0.0367227	0.0635226	0.0833423	0.0123783	0.0763906	0.0464595	0.0877205	0.0586361	0.0640052
796.221	350.534	862.798	514.1	1134.29	760.929	475.136	431.429	877.404	870.736	953.306	499.034	664.651	552.716	785.591	412.232	126.439	82.7319	528.707	522.039	604.609	150.337	315.954	204.019	1.55654	0.816783	0.250522	0.163922	1.04756	1.03435	1.19795	0.297873	0.626021	0.404236	0.0361124	0.0686465	0.0453535	0.0358528	0.0992328	0.127103	0.0773308	0.0373607	0.0626469	0.079112	0.012379	0.0736812	0.0476481	0.0858234	0.0536212	0.0627406
801.229	351.079	863.852	515.155	1133.63	762.671	475.262	432.727	879.419	871.959	956.07	499.722	665.725	554.22	784.933	413.974	126.565	84.0299	530.722	523.262	607.373	151.025	317.028	205.523	1.55524	0.820234	0.250771	0.166494	1.05155	1.03677	1.20343	0.299236	0.628149	0.407216	0.0348087	0.072098	0.0456032	0.0384247	0.103225	0.129526	0.0828073	0.0387238	0.0647749	0.082092	0.0119321	0.0773859	0.0479104	0.0919797	0.0557785	0.0639367
806.236	351.321	864.049	515.351	1135.53	762.462	474.679	432.777	879.401	870.409	955.624	499.062	666.945	554.651	786.828	413.765	125.982	84.0799	530.704	521.712	606.927	150.365	318.248	205.954	1.559	0.81982	0.249616	0.166593	1.05152	1.0337	1.20255	0.297928	0.630566	0.40807	0.0385634	0.0716839	0.044448	0.0385237	0.10319	0.126455	0.0819236	0.0374161	0.0671921	0.082946	0.0132191	0.0769414	0.0466968	0.0922168	0.0557593	0.0624208
811.244	351.192	864.942	516.245	1136.88	760.934	475.511	432.406	881.732	871.921	955.688	498.198	667.427	553.605	788.186	412.237	126.814	83.7089	533.035	523.224	606.991	149.501	318.73	204.908	1.56169	0.816793	0.251265	0.165858	1.05614	1.0367	1.20267	0.296216	0.631521	0.405998	0.041254	0.0686564	0.0460965	0.0377886	0.107808	0.129451	0.0820504	0.0357042	0.0681471	0.0808735	0.0141415	0.0736918	0.0484287	0.0904572	0.058255	0.0638996
816.252	351.195	864.038	515.341	1135.4	761.607	475.042	432.963	879.861	870.988	955.105	499.349	664.315	554.444	786.707	412.91	126.345	84.2659	531.164	522.291	606.408	150.652	315.618	205.747	1.55876	0.818126	0.250336	0.166962	1.05243	1.03485	1.20152	0.298497	0.625355	0.40766	0.0383236	0.0699898	0.0451673	0.0388923	0.104101	0.127602	0.0808953	0.0379848	0.0619811	0.0825358	0.0131369	0.0751231	0.0474524	0.093099	0.0562518	0.0629871
821.259	352.16	865.082	516.385	1137.66	763.622	475.056	433.103	879.536	873.792	956.781	500.087	666.325	555.349	788.966	414.925	126.359	84.4059	530.839	525.095	608.084	151.39	317.628	206.652	1.56323	0.822119	0.250363	0.167239	1.05179	1.04041	1.20484	0.299959	0.629337	0.409453	0.0427995	0.0739823	0.045195	0.0391697	0.103457	0.133158	0.084216	0.039447	0.0659637	0.084329	0.0146712	0.0794084	0.0474816	0.093763	0.0559038	0.0657295
826.267	350.95	865.296	516.599	1137.11	762.506	473.932	433.617	881.811	875.994	957.525	501.225	666.679	558.62	788.415	413.809	125.235	84.9199	533.114	527.297	608.828	152.528	317.982	209.923	1.56214	0.819907	0.248136	0.168257	1.05629	1.04477	1.20631	0.302214	0.630039	0.415934	0.0417078	0.0717711	0.0429679	0.0401881	0.107965	0.137521	0.0856902	0.0417018	0.0666651	0.09081	0.014297	0.077035	0.0451418	0.0962009	0.0583395	0.0678832
831.275	351.561	865.497	516.8	1136.27	763.158	475.809	433.206	883.71	874.927	957.975	500.818	668.021	557.467	787.577	414.461	127.112	84.5089	535.013	526.23	609.278	152.121	319.324	208.77	1.56048	0.821199	0.251855	0.167443	1.06006	1.04265	1.2072	0.301407	0.632698	0.41365	0.0400474	0.0730629	0.046687	0.0393737	0.111727	0.135407	0.0865818	0.0408954	0.0693241	0.0885255	0.0137278	0.0784216	0.049049	0.0942516	0.0603727	0.0668396
836.282	351.349	864.967	516.27	1135.52	763.49	475.512	433.066	882.239	875.007	956.864	499.973	666.602	556.664	786.818	414.793	126.815	84.3689	533.542	526.31	608.167	151.276	317.905	207.967	1.55898	0.821857	0.251267	0.167166	1.05714	1.04281	1.205	0.299733	0.629886	0.412059	0.0385435	0.0737207	0.0460985	0.0390963	0.108813	0.135565	0.0843805	0.0392212	0.0665125	0.0869345	0.0132123	0.0791276	0.0484308	0.0935876	0.0587978	0.0669178
841.29	350.127	864.046	515.349	1135.06	762.273	474.756	433.361	881.546	873.705	955.898	500.546	666.945	557.577	786.367	413.576	126.059	84.6639	532.849	525.008	607.201	151.849	318.248	208.88	1.55808	0.819446	0.249769	0.16775	1.05577	1.04023	1.20309	0.300868	0.630566	0.413868	0.0376499	0.0713094	0.0446006	0.0396808	0.10744	0.132985	0.0824665	0.0403565	0.0671921	0.0887435	0.012906	0.0765395	0.0468571	0.0949867	0.0580558	0.0656444
846.298	350.731	865.245	516.548	1137.27	762.98	474.952	434.184	884.752	875.01	956.917	500.05	666.808	558.046	788.577	414.283	126.255	85.4869	536.055	526.313	608.22	151.353	318.111	209.349	1.56246	0.820847	0.250157	0.169381	1.06212	1.04282	1.20511	0.299886	0.630294	0.414797	0.0420288	0.0727102	0.0449889	0.0413115	0.113792	0.135571	0.0844855	0.0393737	0.0669207	0.0896727	0.014407	0.078043	0.0472651	0.0988902	0.0614883	0.0669208
851.305	350.409	865.561	516.863	1136.31	763.645	475.569	433.241	884.829	874.501	956.845	500.544	666.769	557.501	787.615	414.948	126.872	84.5439	536.132	525.804	608.148	151.847	318.072	208.804	1.56055	0.822164	0.25138	0.167512	1.06227	1.04181	1.20496	0.300864	0.630217	0.413717	0.0401227	0.0740278	0.0462114	0.0394431	0.113944	0.134563	0.0843428	0.0403525	0.0668434	0.0885929	0.0137536	0.0794573	0.0485494	0.0944176	0.0615707	0.0664229
856.313	351.752	866.066	517.368	1135.58	762.542	474.935	433.797	883.696	874.176	957.898	500.896	668.984	557.204	786.883	413.845	126.238	85.0999	534.999	525.479	609.201	152.199	320.287	208.507	1.5591	0.819979	0.250124	0.168614	1.06003	1.04117	1.20705	0.301562	0.634606	0.413129	0.0386723	0.0718424	0.0449552	0.0405447	0.1117	0.133919	0.0864292	0.04105	0.0712321	0.0880044	0.0132565	0.0771115	0.0472297	0.0970546	0.0603577	0.0661051
861.321	352.046	865.11	516.413	1137.53	763.475	475.135	433.903	884.955	875.633	957.596	501.201	670.01	558.288	788.834	414.778	126.438	85.2059	536.258	526.936	608.899	152.504	321.313	209.591	1.56297	0.821827	0.25052	0.168824	1.06252	1.04405	1.20645	0.302166	0.636639	0.415276	0.042538	0.073691	0.0453515	0.0407547	0.114194	0.136805	0.0858309	0.0416543	0.073265	0.0901522	0.0145816	0.0790957	0.047646	0.0975574	0.0617056	0.0675301
866.328	351.269	865.801	517.103	1138.84	763.619	476.449	434.69	884.682	874.175	959.297	500.524	668.716	557.846	790.142	414.922	127.752	85.9929	535.985	525.478	610.6	151.827	320.019	209.149	1.56556	0.822113	0.253123	0.170383	1.06198	1.04116	1.20982	0.300825	0.634075	0.414401	0.0451296	0.0739763	0.047955	0.0423141	0.113653	0.133917	0.0892012	0.0403129	0.0707011	0.0892765	0.01547	0.079402	0.0503812	0.10129	0.0614134	0.0661041
871.336	350.53	866.647	517.95	1139.21	764.411	476.132	434.427	883.87	876.403	959.58	502.263	668.772	559.133	790.513	415.714	127.435	85.7299	535.173	527.706	610.883	153.566	320.075	210.436	1.5663	0.823682	0.252495	0.169862	1.06037	1.04558	1.21038	0.30427	0.634186	0.416951	0.0458647	0.0755456	0.0473269	0.041793	0.112044	0.138331	0.0897619	0.0437585	0.0708121	0.0918265	0.0157219	0.0810863	0.0497214	0.100043	0.060544	0.0682832
876.344	351.103	866.664	517.967	1138.87	764.225	475.133	433.463	883.971	876.471	960.342	501.528	668.45	559.12	790.17	415.528	126.436	84.7659	535.274	527.774	611.645	152.831	319.753	210.423	1.56562	0.823313	0.250516	0.167952	1.06057	1.04571	1.21189	0.302814	0.633548	0.416925	0.0451851	0.075177	0.0453476	0.0398829	0.112244	0.138466	0.0912717	0.0423022	0.0701741	0.0918007	0.015489	0.0806907	0.0476418	0.0954705	0.0606521	0.0683497
881.351	350.829	866.499	517.802	1136.83	764.821	475.808	434.981	885.182	878.516	958.827	501.197	669.732	559.121	788.128	416.124	127.111	86.2839	536.485	529.819	610.13	152.5	321.035	210.424	1.56157	0.824494	0.251853	0.17096	1.06297	1.04977	1.20889	0.302158	0.636088	0.416927	0.0411391	0.0763579	0.046685	0.0428907	0.114644	0.142518	0.0882699	0.0416464	0.0727142	0.0918027	0.0141021	0.0819583	0.0490469	0.10267	0.0619487	0.0703498
886.359	351.502	866.798	518.1	1141.24	764.935	476.18	434.495	887.449	878.774	960.263	502.175	670.037	558.651	792.546	416.238	127.483	85.7979	538.752	530.077	611.566	153.478	321.34	209.954	1.57032	0.82472	0.25259	0.169997	1.06747	1.05028	1.21174	0.304096	0.636692	0.415996	0.0498928	0.0765838	0.047422	0.0419277	0.119136	0.143029	0.0911152	0.0435841	0.0733185	0.0908715	0.0171027	0.0822007	0.0498213	0.100365	0.0643758	0.0706021
891.367	350.903	866.645	517.948	1137.26	764.594	475.471	433.814	885.371	878.507	958.059	501.51	667.698	559.433	788.562	415.897	126.774	85.1169	536.674	529.81	609.362	152.813	319.001	210.736	1.56243	0.824044	0.251186	0.168648	1.06335	1.04975	1.20737	0.302778	0.632058	0.417545	0.041999	0.0759082	0.0460173	0.0405784	0.115018	0.1425	0.0867482	0.0422665	0.0686841	0.0924209	0.0143968	0.0814755	0.0483454	0.0971353	0.062151	0.070341
896.374	350.877	866.798	518.1	1137.77	764.328	476.212	434.218	885.739	878.855	959.283	502.692	669.027	561.077	789.075	415.631	127.515	85.5209	537.042	530.158	610.586	153.995	320.33	212.38	1.56345	0.823517	0.252654	0.169448	1.06408	1.05044	1.20979	0.30512	0.634691	0.420803	0.0430155	0.0753811	0.0474855	0.0413789	0.115748	0.143189	0.0891734	0.0446085	0.0713173	0.0956782	0.0147453	0.0809098	0.0498879	0.0990514	0.062545	0.0706813
901.382	351.498	868.196	519.499	1139.34	765.266	476.591	434.598	887.066	878.909	959.283	501.717	670.944	560.769	790.643	416.569	127.894	85.9009	538.369	530.212	610.586	153.02	322.247	212.072	1.56655	0.825376	0.253405	0.170201	1.06671	1.05054	1.20979	0.303189	0.638489	0.420192	0.0461223	0.0772396	0.0482364	0.0421318	0.118377	0.143296	0.0891734	0.0426767	0.0751156	0.095068	0.0158102	0.0829046	0.0506768	0.100854	0.0639658	0.0707342
906.39	350.024	865.55	516.852	1136.11	764.329	474.953	433.913	886.351	878.171	958.299	500.722	670.607	558.376	787.41	415.632	126.256	85.2159	537.654	529.474	609.602	152.025	321.91	209.679	1.56015	0.823519	0.250159	0.168844	1.06529	1.04908	1.20785	0.301217	0.637822	0.415451	0.0397165	0.0753831	0.0449909	0.0407746	0.11696	0.141834	0.0872238	0.0407052	0.0744479	0.0903266	0.0136144	0.0809119	0.0472672	0.0976048	0.0632003	0.0700124
911.397	350.045	866.456	517.759	1139.09	765.017	476.206	434.365	887.787	879.984	964.537	502.417	672.941	561.42	790.39	416.32	127.509	85.6679	539.09	531.287	615.84	153.72	324.244	212.723	1.56605	0.824883	0.252642	0.169739	1.06814	1.05267	1.2202	0.304575	0.642446	0.421482	0.045621	0.0767463	0.0474736	0.0416701	0.119805	0.145426	0.0995835	0.0440636	0.0790724	0.0963579	0.0156384	0.0823751	0.0498754	0.0997486	0.0647377	0.0717856
916.405	350.998	866.956	518.259	1137.64	764.87	474.896	434.263	887.583	880.418	963.383	502.55	673.062	562.176	788.945	416.173	126.199	85.5659	538.886	531.721	614.686	153.853	324.365	213.479	1.56319	0.824591	0.250046	0.169537	1.06773	1.05353	1.21792	0.304839	0.642686	0.42298	0.0427579	0.076455	0.044878	0.041468	0.119401	0.146286	0.097297	0.0443272	0.0793122	0.0978558	0.014657	0.0820625	0.0471485	0.0992648	0.0645193	0.07221
921.413	350.603	866.856	518.159	1136.91	764.981	476.555	434.253	889.625	881.354	961.667	503.562	670.709	561.426	788.214	416.284	127.858	85.5559	540.928	532.657	612.97	154.865	322.012	212.729	1.56174	0.824811	0.253333	0.169518	1.07178	1.05539	1.21452	0.306844	0.638024	0.421494	0.0413095	0.076675	0.0481651	0.0414482	0.123447	0.148141	0.093897	0.0463323	0.07465	0.0963697	0.0141605	0.0822985	0.0506019	0.0992174	0.0667056	0.0731255
926.421	350.354	865.559	516.862	1137.29	764.859	476.468	434.868	888.799	881.138	961.843	503.626	672.071	561.762	788.59	416.162	127.771	86.1709	540.102	532.441	613.146	154.929	323.374	213.065	1.56249	0.82457	0.253161	0.170736	1.07014	1.05496	1.21487	0.306971	0.640722	0.42216	0.0420545	0.0764332	0.0479927	0.0426668	0.121811	0.147713	0.0942457	0.0464591	0.0773486	0.0970355	0.0144159	0.0820391	0.0504208	0.102134	0.0658212	0.0729142
931.428	350.377	868.692	519.994	1138.44	765.36	476.854	434.909	889.891	883.547	961.861	503.568	671.071	563.902	789.739	416.663	128.157	86.2119	541.194	534.85	613.164	154.871	322.374	215.205	1.56476	0.825562	0.253926	0.170817	1.0723	1.05973	1.2149	0.306856	0.638741	0.4264	0.0443311	0.0774259	0.0487575	0.042748	0.123974	0.152486	0.0942814	0.0463442	0.0753673	0.101276	0.0151962	0.0831045	0.0512243	0.102329	0.0669904	0.0752703
936.436	350.416	868.328	519.631	1138.25	764.128	476.958	433.416	889.778	880.646	962.723	503.516	671.546	563.488	789.553	415.431	128.261	84.7189	541.081	531.949	614.026	154.819	322.849	214.791	1.56439	0.823121	0.254132	0.167859	1.07208	1.05399	1.21661	0.306753	0.639682	0.42558	0.0439626	0.0749848	0.0489636	0.0397898	0.12375	0.146738	0.0959893	0.0462412	0.0763084	0.100455	0.0150699	0.0804845	0.0514408	0.0952476	0.0668694	0.072433
941.444	351.514	867.868	519.171	1138.24	766.708	475.893	434.488	889.824	883.927	964.842	503.618	671.676	563.614	789.543	418.011	127.196	85.7909	541.127	535.23	616.145	154.921	322.979	214.917	1.56437	0.828233	0.252022	0.169983	1.07217	1.06049	1.22081	0.306955	0.63994	0.425829	0.0439428	0.0800968	0.0468534	0.0419138	0.123841	0.153239	0.100188	0.0464433	0.076566	0.100705	0.0150631	0.0859713	0.0492239	0.100332	0.0669186	0.075642
946.451	350.342	868.221	519.524	1140.5	767.354	477.654	434.431	889.943	885.019	965.333	503.533	672.172	564.611	791.799	418.657	128.957	85.7339	541.246	536.322	616.636	154.836	323.475	215.914	1.56884	0.829513	0.255511	0.16987	1.07241	1.06265	1.22178	0.306787	0.640923	0.427805	0.0484127	0.0813767	0.0503426	0.0418009	0.124077	0.155403	0.101161	0.0462748	0.0775487	0.10268	0.0165954	0.0873452	0.0528896	0.100062	0.067046	0.07671
951.459	351.462	868.391	519.694	1139.83	765.469	477.517	435.186	891.124	884.051	965.979	504.138	671.981	564.541	791.136	416.772	128.82	86.4889	542.427	535.354	617.282	155.441	323.284	215.844	1.56753	0.825778	0.255239	0.171366	1.07475	1.06073	1.22306	0.307985	0.640544	0.427666	0.0470991	0.0776419	0.0500711	0.0432968	0.126417	0.153485	0.102441	0.0474736	0.0771703	0.102542	0.0161451	0.0833363	0.0526044	0.103643	0.0683105	0.0757633
956.467	350.192	868.034	519.337	1137.73	766.747	476.682	435.144	889.324	883.015	963.395	504.074	673.294	565.676	789.034	418.05	127.985	86.4469	540.627	534.318	614.698	155.377	324.597	216.979	1.56337	0.82831	0.253585	0.171283	1.07118	1.05868	1.21794	0.307859	0.643146	0.429915	0.0429342	0.080174	0.0484167	0.0432136	0.122851	0.151432	0.0973208	0.0473468	0.0797718	0.104791	0.0147174	0.0860543	0.0508663	0.103443	0.0663833	0.07475
961.474	350.326	868.442	519.744	1138.48	765.464	475.903	434.289	891.984	882.847	961.074	502.951	672.149	563.951	789.788	416.767	127.206	85.5919	543.287	534.15	612.377	154.254	323.452	215.254	1.56486	0.825768	0.252042	0.169589	1.07645	1.05835	1.21334	0.305634	0.640877	0.426497	0.0444282	0.077632	0.0468732	0.0415196	0.128121	0.151099	0.092722	0.0451217	0.0775032	0.101373	0.0152295	0.0833257	0.0492447	0.0993882	0.0692312	0.0745857
966.482	351.094	869.358	520.661	1138.31	767.582	477.417	434.942	893.526	885.138	965.3	503.79	673.509	565.553	789.612	418.885	128.72	86.2449	544.829	536.441	616.603	155.093	324.812	216.856	1.56451	0.829965	0.255041	0.170883	1.07951	1.06289	1.22172	0.307296	0.643572	0.429671	0.0440795	0.0818285	0.049873	0.0428134	0.131176	0.155638	0.101095	0.046784	0.0801978	0.104547	0.01511	0.08783	0.0523962	0.102485	0.0708822	0.0768264
971.49	350.826	868.832	520.135	1136.52	765.73	476.283	435.311	891.295	884.808	962.528	504.68	672.967	565.423	787.819	417.033	127.586	86.6139	542.598	536.111	613.831	155.983	324.27	216.726	1.56096	0.826295	0.252794	0.171614	1.07509	1.06223	1.21622	0.309059	0.642498	0.429414	0.0405269	0.078159	0.0476261	0.0435445	0.126756	0.154985	0.095603	0.0485475	0.0791239	0.104289	0.0138922	0.0838914	0.0500357	0.104235	0.0684935	0.0765036
976.497	351.153	869.184	520.487	1136.91	767.155	476.892	435.488	891.025	883.558	964.923	504.133	673.99	565.778	788.21	418.458	128.195	86.7909	542.328	534.861	616.226	155.436	325.293	217.081	1.56173	0.829119	0.254001	0.171965	1.07455	1.05976	1.22097	0.307976	0.644525	0.430117	0.0413016	0.0809824	0.0488328	0.0438952	0.126221	0.152508	0.100348	0.0474637	0.0811509	0.104993	0.0141578	0.0869219	0.0513034	0.105075	0.0682045	0.0752811
981.505	350.927	871.902	523.205	1139.87	768.442	477.907	437.103	894.004	886.67	968.96	505.737	674.951	567.716	791.174	419.745	129.21	88.4059	545.307	537.973	620.263	157.04	326.254	219.019	1.56761	0.831669	0.256012	0.175164	1.08045	1.06592	1.22897	0.311154	0.646429	0.433957	0.0471744	0.0835325	0.0508439	0.0470951	0.132124	0.158674	0.108347	0.0506418	0.083055	0.108833	0.0161709	0.089659	0.0534162	0.112735	0.0713939	0.0783248
986.513	350.046	872.89	524.193	1140.44	769.249	477.713	436.104	895.197	886.717	967.138	505.191	675.031	567.244	791.739	420.552	129.016	87.4069	546.5	538.02	618.441	156.494	326.334	218.547	1.56873	0.833268	0.255628	0.173185	1.08282	1.06601	1.22536	0.310072	0.646587	0.433022	0.0482938	0.0851314	0.0504595	0.0451157	0.134487	0.158767	0.104737	0.0495599	0.0832135	0.107897	0.0165546	0.0913752	0.0530124	0.107997	0.0726712	0.0783707
991.52	350.586	871.944	523.247	1138.91	769.72	477.931	435.419	893.545	887.297	965.578	503.959	674.228	565.993	790.217	421.023	129.234	86.7219	544.848	538.6	616.881	155.262	325.531	217.296	1.56571	0.834201	0.25606	0.171828	1.07954	1.06716	1.22227	0.307631	0.644996	0.430543	0.0452782	0.0860647	0.0508914	0.0437585	0.131214	0.159916	0.101646	0.0471189	0.0816224	0.105419	0.0155209	0.0923769	0.0534662	0.104748	0.0709025	0.078938
996.528	350.775	871.695	522.998	1137.42	768.813	477.784	436.393	894.722	885.042	964.732	505.417	672.422	567.922	788.723	420.116	129.087	87.6959	546.025	536.345	616.035	156.72	323.725	219.225	1.56275	0.832404	0.255768	0.173758	1.08188	1.0627	1.22059	0.31052	0.641418	0.434365	0.042318	0.0842676	0.0506002	0.0456883	0.133546	0.155448	0.0999699	0.0500077	0.0780441	0.109241	0.0145062	0.090448	0.0531602	0.109367	0.0721627	0.0767325
1001.54	350.799	871.434	522.737	1139.21	769.813	477.019	435.542	894.282	887.341	964.462	505.609	673.843	568.374	790.513	421.116	128.322	86.8449	545.585	538.644	615.765	156.912	325.146	219.677	1.5663	0.834385	0.254253	0.172072	1.081	1.06725	1.22006	0.3109	0.644233	0.435261	0.0458647	0.0862489	0.0490844	0.0440022	0.132674	0.160003	0.0994349	0.0503882	0.0808596	0.110136	0.0157219	0.0925747	0.0515678	0.105331	0.0716916	0.078981
1006.54	350.056	871.027	522.33	1140.03	769.658	478.366	436.5	894.63	887.197	966.33	505.216	674.78	567.589	791.333	420.961	129.669	87.8029	545.933	538.5	617.633	156.519	326.083	218.892	1.56792	0.834078	0.256922	0.17397	1.08169	1.06697	1.22376	0.310121	0.64609	0.433705	0.0474894	0.0859418	0.0517533	0.0459004	0.133364	0.159718	0.103136	0.0496095	0.0827161	0.108581	0.0162789	0.092245	0.0543717	0.109875	0.0720642	0.0788402
1011.55	351.248	870.885	522.188	1138.95	769.047	477.797	436.186	894.986	887.416	966.42	505.584	674.93	568.231	790.254	420.35	129.1	87.4889	546.289	538.719	617.723	156.887	326.233	219.534	1.56578	0.832867	0.255794	0.173348	1.0824	1.0674	1.22394	0.31085	0.646387	0.434977	0.0453515	0.0847312	0.0506259	0.0452782	0.134069	0.160152	0.103314	0.0503386	0.0830133	0.109853	0.015546	0.0909456	0.0531873	0.108386	0.0724453	0.0790544
1016.56	350.413	871.759	523.062	1140.73	770.134	479.001	436.187	895.672	889.478	966.223	506.96	675.657	570.828	792.031	421.437	130.304	87.4899	546.975	540.781	617.526	158.263	326.96	222.131	1.5693	0.835021	0.25818	0.17335	1.08376	1.07149	1.22355	0.313577	0.647828	0.440123	0.0488724	0.0868849	0.0530115	0.0452802	0.135428	0.164238	0.102924	0.053065	0.0844538	0.114999	0.016753	0.0932573	0.0556935	0.10839	0.0731798	0.0810711
1021.57	351.093	872.382	523.685	1138.64	769.368	478.371	436.203	896.107	887.764	965.207	506.673	675.979	570.294	789.942	420.671	129.674	87.5059	547.41	539.067	616.51	157.976	327.282	221.597	1.56517	0.833503	0.256932	0.173381	1.08462	1.06809	1.22153	0.313008	0.648466	0.439065	0.0447333	0.0853672	0.0517632	0.0453119	0.13629	0.160841	0.100911	0.0524963	0.0850918	0.113941	0.0153341	0.0916283	0.0543821	0.108466	0.0736455	0.0793947
1026.57	350.715	873.795	525.097	1139.36	770.505	478.167	435.888	894.366	890.837	967.198	505.373	674.049	570.922	790.661	421.808	129.47	87.1909	545.669	542.14	618.501	156.676	325.352	222.225	1.56659	0.835756	0.256527	0.172757	1.08117	1.07418	1.22548	0.310432	0.644642	0.440309	0.0461579	0.08762	0.051359	0.0446878	0.132841	0.16693	0.104856	0.0499206	0.0812678	0.115185	0.0158225	0.0940463	0.0539575	0.106972	0.0717815	0.0824003
1031.58	350.897	875.287	526.59	1141.75	771.418	477.803	436.734	899.114	892.409	967.038	507.583	677.059	572.657	793.049	422.721	129.106	88.0369	550.417	543.712	618.341	158.886	328.362	223.96	1.57132	0.837565	0.255806	0.174433	1.09058	1.07729	1.22516	0.314811	0.650605	0.443747	0.0508894	0.089429	0.0506378	0.046364	0.142248	0.170045	0.104539	0.0542994	0.0872317	0.118622	0.0174444	0.095988	0.0531997	0.110985	0.0768649	0.0839378
1036.59	350.268	872.901	524.204	1141.43	770.019	477.565	434.659	898.958	890.283	967.055	505.676	676.49	569.556	792.735	421.322	128.868	85.9619	550.261	541.586	618.358	156.979	327.793	220.859	1.5707	0.834793	0.255335	0.170322	1.09027	1.07308	1.22519	0.311033	0.649478	0.437603	0.0502673	0.0866571	0.0501662	0.0422527	0.141939	0.165833	0.104573	0.0505209	0.0861043	0.112478	0.0172311	0.0930128	0.0527043	0.101143	0.0766979	0.0818584
1041.6	351.074	872.461	523.764	1140.73	771.133	479.103	436.378	900.402	893.368	967.583	505.675	676.041	569.941	792.029	422.436	130.406	87.6809	551.705	544.671	618.886	156.978	327.344	221.244	1.5693	0.837001	0.258382	0.173728	1.09313	1.07919	1.22624	0.311031	0.648588	0.438365	0.0488684	0.0888643	0.0532136	0.0456586	0.1448	0.171945	0.105619	0.0505189	0.0852146	0.113241	0.0167516	0.0953819	0.0559058	0.109296	0.0782439	0.0848757
1046.61	351.417	873.227	524.53	1140.44	769.813	478.641	435.841	899.527	889.486	968.7	505.408	676.503	570.064	791.744	421.116	129.944	87.1439	550.83	540.789	620.003	156.711	327.806	221.367	1.56874	0.834385	0.257467	0.172664	1.0914	1.0715	1.22845	0.310502	0.649504	0.438609	0.0483038	0.0862489	0.0522982	0.0445946	0.143067	0.164253	0.107832	0.0499899	0.08613	0.113485	0.016558	0.0925747	0.0549441	0.106749	0.0773071	0.0810789
1051.61	351.275	874.111	525.414	1141.87	770.211	478.002	436.536	900.897	890.598	969.149	506.142	679.013	570.176	793.168	421.514	129.305	87.8389	552.2	541.901	620.452	157.445	330.316	221.479	1.57156	0.835174	0.2562	0.174041	1.09411	1.0737	1.22934	0.311956	0.654477	0.438831	0.0511252	0.0870375	0.0510321	0.0459717	0.145781	0.166457	0.108722	0.0514442	0.0911033	0.113707	0.0175252	0.0934211	0.053614	0.110046	0.0787739	0.0821665
1056.62	350.514	875.472	526.775	1139.44	770.573	477.797	436.994	899.88	894.288	969.54	506.007	677.346	569.185	790.744	421.876	129.1	88.2969	551.183	545.591	620.843	157.31	328.649	220.488	1.56675	0.835891	0.255794	0.174949	1.0921	1.08102	1.23012	0.311689	0.651174	0.436867	0.0463224	0.0877548	0.0506259	0.0468792	0.143766	0.173768	0.109496	0.0511767	0.0878003	0.111743	0.0158788	0.094191	0.0531873	0.112218	0.077685	0.0857755
1061.63	350.617	874.707	526.01	1141.02	770.164	478.144	437.507	902.601	894.031	968.987	508.315	677.59	573.978	792.327	421.467	129.447	88.8099	553.904	545.334	620.29	159.618	328.893	225.281	1.56989	0.835081	0.256482	0.175965	1.09749	1.08051	1.22902	0.316262	0.651658	0.446364	0.0494589	0.0869444	0.0513135	0.0478956	0.149157	0.173259	0.108401	0.0557497	0.0882838	0.12124	0.016954	0.0933211	0.0539096	0.114651	0.0805983	0.0855242
1066.63	350.831	874.426	525.728	1141.32	770.701	478.521	437.071	901.926	892.217	968.256	507.516	675.552	571.939	792.621	422.004	129.824	88.3739	553.229	543.52	619.559	158.819	326.855	223.242	1.57047	0.836145	0.257229	0.175101	1.09615	1.07691	1.22757	0.314678	0.64762	0.442324	0.0500414	0.0880084	0.0520604	0.0470317	0.14782	0.169664	0.106952	0.0541666	0.0842458	0.1172	0.0171537	0.0944632	0.0546943	0.112583	0.0798756	0.08375
1071.64	350.211	874.97	526.273	1141.59	771.685	478.097	437.466	901.985	893.082	969.087	507.862	678.874	572.543	792.895	422.988	129.4	88.7689	553.288	544.385	620.39	159.165	330.177	223.846	1.57102	0.838094	0.256389	0.175884	1.09627	1.07863	1.22922	0.315364	0.654202	0.443521	0.0505843	0.089958	0.0512203	0.0478144	0.147937	0.171378	0.108599	0.0548522	0.0908279	0.118397	0.0173398	0.0965558	0.0538117	0.114456	0.0799388	0.084596
1076.65	350.62	876.374	527.677	1140.77	772.581	478.98	437.136	902.713	894.562	971.256	508.294	678.354	572.62	792.075	423.884	130.283	88.4389	554.016	545.865	622.559	159.597	329.657	223.923	1.56939	0.83987	0.258138	0.17523	1.09771	1.08156	1.23352	0.31622	0.653171	0.443673	0.0489596	0.0917333	0.0529699	0.0471605	0.149379	0.174311	0.112896	0.0557081	0.0897976	0.118549	0.0167828	0.0984613	0.0556498	0.112891	0.0807182	0.0860435
1081.66	350.373	876.163	527.466	1141.69	771.499	479.52	437.614	903.216	894.113	968.55	508.593	677.75	573.111	792.991	422.802	130.823	88.9169	554.519	545.416	619.853	159.896	329.053	224.414	1.57121	0.837726	0.259208	0.176177	1.09871	1.08067	1.22816	0.316812	0.651975	0.444646	0.0507745	0.0895895	0.0540398	0.0481076	0.150376	0.173421	0.107535	0.0563006	0.0886008	0.119522	0.017405	0.0961603	0.0567739	0.115158	0.0812567	0.0856044
1086.67	350.304	876.522	527.825	1140.95	772.16	478.739	437.128	902.385	894.916	970.96	508.822	677.274	575.53	792.256	423.463	130.042	88.4309	553.688	546.219	622.263	160.125	328.577	226.833	1.56975	0.839035	0.257661	0.175214	1.09706	1.08226	1.23293	0.317266	0.651031	0.449439	0.0493182	0.0908992	0.0524924	0.0471447	0.148729	0.175012	0.11231	0.0567543	0.0876577	0.124315	0.0169058	0.097566	0.0551481	0.112853	0.080367	0.0863897
1091.67	350.282	875.889	527.192	1143.26	771.933	478.125	436.476	901.648	894.127	968.527	508.324	678.959	574.405	794.566	423.236	129.428	87.7789	552.951	545.43	619.83	159.627	330.262	225.708	1.57433	0.838586	0.256444	0.173922	1.0956	1.0807	1.22811	0.316279	0.65437	0.44721	0.0538952	0.0904494	0.0512758	0.0458528	0.147269	0.173449	0.107489	0.0557676	0.0909963	0.122086	0.0184747	0.0970832	0.05387	0.109761	0.079578	0.085618
1096.68	350.769	876.317	527.62	1140.38	770.484	478.882	436.145	899.873	896.478	967.948	507.79	677.342	573.175	791.688	421.787	130.185	87.4479	551.176	547.781	619.251	159.093	328.645	224.478	1.56862	0.835715	0.257944	0.173266	1.09208	1.08536	1.22696	0.315221	0.651166	0.444773	0.0481928	0.0875784	0.0527757	0.045197	0.143752	0.178107	0.106342	0.0547095	0.0877924	0.119649	0.01652	0.0940017	0.0554458	0.108191	0.0776776	0.0879174
1101.69	350.038	875.593	526.896	1141.67	771.569	479.641	436.746	901.282	895.476	970.092	508.788	678.683	574.716	792.97	422.872	130.944	88.0489	552.585	546.779	621.395	160.091	329.986	226.019	1.57116	0.837864	0.259448	0.174457	1.09487	1.08337	1.23121	0.317199	0.653823	0.447826	0.0507329	0.0897282	0.0542796	0.0463878	0.146544	0.176122	0.11059	0.0566869	0.0904494	0.122702	0.0173907	0.0963091	0.0570258	0.111042	0.0791861	0.0869374
1106.7	350.181	873.099	524.402	1140.48	771.28	479.257	436.548	902.738	895.979	969.185	507.929	678.351	574.102	791.788	422.583	130.56	87.8509	554.041	547.282	620.488	159.232	329.654	225.405	1.56882	0.837292	0.258687	0.174065	1.09776	1.08437	1.22941	0.315497	0.653165	0.44661	0.0483909	0.0891556	0.0535187	0.0459955	0.149429	0.177118	0.108793	0.0549849	0.0897916	0.121486	0.0165879	0.0956945	0.0562264	0.110102	0.080745	0.0874294
1111.7	351.722	877.236	528.539	1141.94	772.95	480.153	437.778	905.238	898	970.666	508.575	678.007	575.589	793.242	424.253	131.456	89.0809	556.541	549.303	621.969	159.878	329.31	226.892	1.5717	0.840601	0.260462	0.176502	1.10271	1.08837	1.23235	0.316777	0.652484	0.449556	0.0512718	0.0924645	0.055294	0.0484325	0.154382	0.181123	0.111727	0.0562649	0.08911	0.124432	0.0175755	0.0992461	0.0580915	0.115936	0.0834216	0.089406
1116.71	350.715	875.753	527.056	1141.44	771.081	479.104	437.491	903.578	895.939	967.679	509.843	678.309	576.901	792.748	422.384	130.407	88.7939	554.881	547.242	618.982	161.146	329.612	228.204	1.57072	0.836898	0.258384	0.175933	1.09942	1.08429	1.22643	0.319289	0.653082	0.452156	0.050293	0.0887613	0.0532156	0.0478639	0.151093	0.177039	0.105809	0.0587773	0.0897084	0.127031	0.0172399	0.0952713	0.0559079	0.114575	0.0816443	0.0873903
1121.72	350.761	875.776	527.079	1141.55	773.166	478.814	437.778	903.536	895.289	967.777	510.47	679.507	577.926	792.853	424.469	130.117	89.0809	554.839	546.592	619.08	161.773	330.81	229.229	1.57093	0.841029	0.257809	0.176502	1.09934	1.083	1.22662	0.320531	0.655456	0.454187	0.0505011	0.0928924	0.052641	0.0484325	0.15101	0.175751	0.106003	0.0600196	0.0920821	0.129062	0.0173113	0.0997055	0.0553043	0.115936	0.0815993	0.0867545
1126.73	351.112	877.534	528.837	1144.06	772.705	479.345	437.895	905.868	897.561	968.966	510.454	678.021	577.157	795.362	424.008	130.648	89.1979	557.171	548.864	620.269	161.757	329.324	228.46	1.5759	0.840115	0.258861	0.176734	1.10396	1.0875	1.22898	0.3205	0.652512	0.452663	0.0554723	0.091979	0.0536931	0.0486644	0.15563	0.180253	0.108359	0.0599879	0.0891378	0.127539	0.0190153	0.0987251	0.0564096	0.116491	0.0840961	0.0889767
1131.73	351.474	876.586	527.889	1144.87	772.568	479.069	437.099	904.586	897.403	968.393	511.031	677.331	578.099	796.177	423.871	130.372	88.4019	555.889	548.706	619.696	162.334	328.634	229.402	1.57752	0.839844	0.258315	0.175157	1.10142	1.08719	1.22785	0.321643	0.651144	0.454529	0.0570872	0.0917076	0.0531462	0.0470872	0.15309	0.17994	0.107224	0.0611311	0.0877706	0.129405	0.0195689	0.0984337	0.0558351	0.112716	0.0827235	0.0888221
1136.74	350.094	876.614	527.917	1140.71	772.723	479.098	437.623	903.213	896.439	969.663	509.871	675.808	576.753	792.016	424.026	130.401	88.9259	554.516	547.742	620.966	161.174	327.111	228.056	1.56927	0.840151	0.258372	0.176195	1.0987	1.08528	1.23036	0.319345	0.648127	0.451862	0.0488427	0.0920147	0.0532037	0.0481254	0.15037	0.17803	0.10974	0.0588327	0.084753	0.126738	0.0167428	0.0987633	0.0558954	0.115201	0.0812535	0.0878793
1141.75	350.744	876.27	527.573	1140.59	771.828	479.108	438.319	901.902	894.841	969.713	509.185	677.814	574.42	791.893	423.131	130.411	89.6219	553.205	546.144	621.016	160.488	329.117	225.723	1.56903	0.838378	0.258392	0.177574	1.0961	1.08211	1.23046	0.317985	0.652101	0.44724	0.048599	0.0902414	0.0532235	0.0495045	0.147772	0.174864	0.109839	0.0574735	0.0887276	0.122116	0.0166592	0.0968599	0.0559163	0.118502	0.0798499	0.0863164
1146.76	350.03	876.528	527.831	1141.31	770.653	479.669	438.867	902.342	895.769	967.311	508.976	677.885	575.268	792.617	421.956	130.972	90.1699	553.645	547.072	618.614	160.279	329.188	226.571	1.57047	0.83605	0.259503	0.17866	1.09697	1.08395	1.2257	0.317571	0.652242	0.44892	0.0500335	0.0879133	0.054335	0.0505903	0.148644	0.176702	0.10508	0.0570594	0.0888683	0.123796	0.017151	0.0943611	0.057084	0.121101	0.080321	0.087224
1151.77	350.438	876.727	528.03	1142.94	772.373	480.125	438.966	903.129	894.67	969.639	510.475	677.272	576.324	794.245	423.676	131.428	90.2689	554.432	545.973	620.942	161.778	328.575	227.627	1.57369	0.839458	0.260407	0.178856	1.09853	1.08177	1.23031	0.320541	0.651027	0.451012	0.0532592	0.0913212	0.0552385	0.0507864	0.150203	0.174525	0.109692	0.0600295	0.0876537	0.125888	0.0182567	0.098019	0.0580333	0.121571	0.0811636	0.0861491
1156.77	350.169	877.437	528.739	1142.67	773.486	480.009	438.893	902.519	896.926	969.808	510.648	678.688	576.677	793.978	424.789	131.312	90.1959	553.822	548.229	621.111	161.951	329.991	227.98	1.57316	0.841663	0.260177	0.178711	1.09732	1.08624	1.23065	0.320884	0.653833	0.451712	0.0527301	0.0935265	0.0550087	0.0506418	0.148995	0.178995	0.110027	0.0603723	0.0904593	0.126588	0.0180753	0.100386	0.0577918	0.121225	0.0805105	0.0883556
1161.78	351.285	877.938	529.241	1143.78	773.006	479.833	439.605	903.938	897.078	971.852	510.754	677.602	576.605	795.084	424.309	131.136	90.9079	555.241	548.381	623.155	162.057	328.905	227.908	1.57535	0.840712	0.259828	0.180122	1.10014	1.08654	1.2347	0.321094	0.651681	0.451569	0.0549215	0.0925754	0.05466	0.0520525	0.151806	0.179296	0.114077	0.0605823	0.0883076	0.126445	0.0188265	0.0993652	0.0574254	0.124602	0.0820297	0.0885043
1166.79	351.28	877.402	528.705	1141.7	772.288	479.95	438.746	903.685	895.975	967.82	509.784	677.72	575.575	793.001	423.591	131.253	90.0489	554.988	547.278	619.123	161.087	329.023	226.878	1.57123	0.839289	0.26006	0.17842	1.09963	1.08436	1.22671	0.319172	0.651915	0.449528	0.0507943	0.0911528	0.0548918	0.0503505	0.151305	0.17711	0.106088	0.0586604	0.0885414	0.124404	0.0174118	0.0978382	0.057669	0.120527	0.0817589	0.0874255
1171.8	351.103	876.278	527.581	1140.76	771.404	480.133	439.241	904.577	895.537	969.788	510.058	676.751	576.515	792.062	422.707	131.436	90.5439	555.88	546.84	621.091	161.361	328.054	227.818	1.56937	0.837538	0.260423	0.179401	1.1014	1.08349	1.23061	0.319715	0.649995	0.451391	0.0489338	0.0894013	0.0552544	0.0513313	0.153073	0.176243	0.109988	0.0592033	0.0866214	0.126267	0.016774	0.0959582	0.0580499	0.122875	0.0827139	0.0869971
1176.8	350.163	876.802	528.104	1143.94	771.167	479.746	439.213	903.102	897.428	968.404	510.244	675.238	575.788	795.242	422.47	131.049	90.5159	554.405	548.731	619.707	161.547	326.541	227.091	1.57567	0.837068	0.259656	0.179345	1.09848	1.08724	1.22787	0.320084	0.646997	0.44995	0.0552346	0.0889317	0.0544876	0.0512758	0.15015	0.179989	0.107245	0.0595718	0.0836236	0.124826	0.0189338	0.0954542	0.0572443	0.122742	0.0811347	0.0888466
1181.81	350.29	876.22	527.523	1140.84	772.666	479.143	438.71	902.851	896.958	967.337	510.206	674.885	577.096	792.143	423.969	130.446	90.0129	554.154	548.261	618.64	161.509	326.188	228.399	1.56953	0.840038	0.258461	0.178349	1.09798	1.08631	1.22575	0.320008	0.646298	0.452542	0.0490943	0.0919018	0.0532928	0.0502792	0.149653	0.179058	0.105131	0.0594965	0.0829242	0.127418	0.016829	0.0986421	0.0559891	0.120357	0.0808659	0.0883869
1186.82	350.133	875.312	526.614	1138.3	771.202	480.031	438.034	901.515	897.191	966.303	510.12	674.481	575.763	789.603	422.505	131.334	89.3369	552.818	548.494	617.606	161.423	325.784	227.066	1.56449	0.837137	0.260221	0.177009	1.09534	1.08677	1.2237	0.319838	0.645497	0.449901	0.0440616	0.089001	0.0550523	0.0489398	0.147006	0.17952	0.103083	0.0593261	0.0821237	0.124777	0.0151039	0.0955286	0.0578376	0.11715	0.0794356	0.0886148
1191.83	349.881	872.712	524.015	1137.22	771.393	479.614	438.588	901.614	896.45	965.37	510.135	673.862	575.716	788.525	422.696	130.917	89.8909	552.917	547.753	616.673	161.438	325.165	227.019	1.56236	0.837516	0.259394	0.178107	1.09553	1.0853	1.22186	0.319868	0.644271	0.449808	0.0419257	0.0893795	0.0542261	0.0500375	0.147202	0.178052	0.101234	0.0593558	0.0808972	0.124683	0.0143717	0.0959348	0.0569695	0.119778	0.0795415	0.08789
1196.84	350.036	875.157	526.46	1138.83	770.928	479.478	439.5	901.882	896.828	966.973	510.465	674.864	575.612	790.137	422.231	130.781	90.8029	553.185	548.131	618.276	161.768	326.167	226.915	1.56555	0.836594	0.259125	0.179914	1.09606	1.08605	1.22503	0.320522	0.646256	0.449602	0.0451197	0.0884581	0.0539566	0.0518445	0.147733	0.178801	0.10441	0.0600097	0.0828826	0.124477	0.0154666	0.0949459	0.0566864	0.124104	0.0798285	0.0882597
1201.84	350.337	874.627	525.93	1140.44	772.519	480.435	439.463	901.658	899.041	968.302	509.867	673.719	574.676	791.739	423.822	131.738	90.7659	552.961	550.344	619.605	161.17	325.022	225.979	1.56873	0.839747	0.261021	0.17984	1.09562	1.09043	1.22766	0.319337	0.643988	0.447747	0.0482938	0.0916105	0.0558528	0.0517711	0.147289	0.183185	0.107043	0.0588248	0.0806139	0.122623	0.0165546	0.0983295	0.0586786	0.123928	0.0795887	0.0904242
1206.85	349.54	873.125	524.428	1138.55	771.536	480.161	439.065	902.329	899.066	966.623	508.399	674.57	574.068	789.85	422.839	131.464	90.3679	553.632	550.369	617.926	159.702	325.873	225.371	1.56498	0.837799	0.260478	0.179052	1.09695	1.09048	1.22434	0.316428	0.645674	0.446542	0.044551	0.0896628	0.0553099	0.0509826	0.148618	0.183235	0.103717	0.0559162	0.0823001	0.121418	0.0152716	0.096239	0.0581082	0.12204	0.0803071	0.0904486
1211.86	349.309	874.294	525.596	1137.47	770.236	480.053	438.537	902.339	898.47	965.107	509.7	672.351	575.259	788.773	421.539	131.356	89.8399	553.642	549.773	616.41	161.003	323.654	226.562	1.56285	0.835223	0.260264	0.178006	1.09697	1.0893	1.22133	0.319006	0.641277	0.448902	0.0424171	0.087087	0.0550959	0.0499364	0.148638	0.182054	0.100713	0.0584939	0.0779034	0.123778	0.0145401	0.0934743	0.0578834	0.119536	0.0803178	0.0898657
1216.87	349.969	873.59	524.893	1135.81	770.39	479.087	438.485	902.455	896.602	965.948	509.626	672.731	575	787.111	421.693	130.39	89.7879	553.758	547.905	617.251	160.929	324.034	226.303	1.55956	0.835528	0.25835	0.177903	1.0972	1.0856	1.223	0.318859	0.64203	0.448389	0.0391241	0.0873922	0.0531819	0.0498334	0.148868	0.178353	0.102379	0.0583473	0.0786563	0.123265	0.0134113	0.0938018	0.0558725	0.11929	0.080442	0.0880387
1221.87	349.584	872.933	524.235	1139.11	770.45	479.469	438.238	904.524	896.813	966.756	511.098	674.485	575.004	790.411	421.753	130.772	89.5409	555.827	548.116	618.059	162.401	325.788	226.307	1.56609	0.835647	0.259107	0.177413	1.1013	1.08602	1.2246	0.321776	0.645505	0.448397	0.0456626	0.0875111	0.0539388	0.049344	0.152968	0.178771	0.10398	0.0612639	0.0821316	0.123273	0.0156527	0.0939294	0.0566677	0.118118	0.0826571	0.0882451
1226.88	350.223	870.312	521.614	1134.22	770.311	480.108	438.282	902.582	896.037	963.306	509.135	673.18	573.324	785.523	421.614	131.411	89.5849	553.885	547.34	614.609	160.438	324.483	224.627	1.55641	0.835372	0.260373	0.177501	1.09745	1.08448	1.21777	0.317886	0.64292	0.445068	0.0359777	0.0872356	0.0552049	0.0494312	0.14912	0.177233	0.0971445	0.0573745	0.079546	0.119944	0.0123328	0.0936338	0.0579979	0.118327	0.0805779	0.0874861
1231.89	349.494	871.71	523.013	1138.92	772.175	481.189	439.373	904.774	897.022	965.694	509.768	673.21	574.362	790.226	423.478	132.492	90.6759	556.077	548.325	616.997	161.071	324.513	225.665	1.56573	0.839065	0.262515	0.179662	1.10179	1.08643	1.2225	0.319141	0.642979	0.447125	0.045296	0.0909289	0.0573467	0.0515928	0.153463	0.179185	0.101876	0.0586287	0.0796054	0.122001	0.015527	0.0975979	0.0602481	0.123501	0.0829248	0.0884495
1236.9	349.501	870.202	521.505	1134.9	769.215	479.378	437.938	902.123	897.779	964.062	509.058	672.534	573.396	786.201	420.518	130.681	89.2409	553.426	549.082	615.365	160.361	323.837	224.699	1.55775	0.8332	0.258927	0.176819	1.09654	1.08793	1.21926	0.317734	0.64164	0.445211	0.037321	0.0850641	0.0537585	0.0487496	0.14821	0.180685	0.0986424	0.0572219	0.078266	0.120087	0.0127933	0.0913029	0.0564783	0.116695	0.0800865	0.0891899
1241.9	349.406	870.452	521.755	1137.5	769.336	479.895	438.916	902.434	896.991	963.459	510.081	674.791	574.115	788.807	420.639	131.198	90.2189	553.737	548.294	614.762	161.384	326.094	225.418	1.56292	0.83344	0.259951	0.178757	1.09716	1.08637	1.21807	0.319761	0.646112	0.446636	0.0424845	0.0853038	0.0547828	0.0506873	0.148826	0.179124	0.0974476	0.0592488	0.0827379	0.121511	0.0145632	0.0915602	0.0575545	0.121334	0.0804195	0.0884192
1246.91	348.949	867.966	519.269	1134.55	768.129	480.947	437.734	900.79	896.77	963.84	509.802	672.046	574.438	785.849	419.432	132.25	89.0369	552.093	548.073	615.143	161.105	323.349	225.741	1.55706	0.831049	0.262036	0.176415	1.0939	1.08593	1.21882	0.319208	0.640673	0.447276	0.0366236	0.0829123	0.0568672	0.0483454	0.145569	0.178686	0.0982025	0.058696	0.0772991	0.122151	0.0125542	0.0889933	0.0597443	0.115728	0.0786593	0.088203
1251.92	348.882	868.759	520.062	1136.06	770.101	480.092	437.521	899.233	896.64	964.581	509.919	672.859	575.277	787.361	421.404	131.395	88.8239	550.536	547.943	615.884	161.222	324.162	226.58	1.56005	0.834956	0.260341	0.175993	1.09081	1.08568	1.22029	0.31944	0.642284	0.448938	0.0396194	0.0868196	0.0551732	0.0479233	0.142484	0.178428	0.0996707	0.0589278	0.0789099	0.123814	0.0135811	0.0931872	0.0579646	0.114717	0.0769923	0.0880759
1256.93	348.754	868.028	519.331	1136.39	768.319	480.687	438.159	901.628	894.986	965.036	510.649	671.499	574.825	787.691	419.622	131.99	89.4619	552.931	546.289	616.339	161.952	322.802	226.128	1.5607	0.831425	0.26152	0.177257	1.09556	1.0824	1.22119	0.320886	0.639589	0.448042	0.0402733	0.0832888	0.0563521	0.0491874	0.147229	0.175151	0.100572	0.0603742	0.0762153	0.122918	0.0138053	0.0893974	0.0592031	0.117743	0.0795565	0.0864582
1261.93	348.51	865.943	517.246	1135.81	767.797	480.01	437.28	898.264	894.459	963.231	508.155	670.831	571.286	787.117	419.1	131.313	88.5829	549.567	545.762	614.534	159.458	322.134	222.589	1.55957	0.830391	0.260179	0.175515	1.08889	1.08135	1.21762	0.315945	0.638265	0.44103	0.039136	0.0822545	0.0550107	0.0474458	0.140564	0.174107	0.0969959	0.0554327	0.0748917	0.115906	0.0134154	0.0882873	0.0577939	0.113574	0.0759549	0.0859428
1266.94	348.981	867.562	518.864	1135.14	768.97	480.767	438.199	899.32	896.431	963.607	509.232	671.864	573.462	786.442	420.273	132.07	89.5019	550.623	547.734	614.91	160.535	323.167	224.765	1.55823	0.832715	0.261679	0.177336	1.09099	1.08526	1.21836	0.318079	0.640312	0.445342	0.0377985	0.0845786	0.0565106	0.0492667	0.142656	0.178014	0.0977409	0.0575666	0.0769385	0.120217	0.012957	0.0907819	0.0593696	0.117933	0.0770855	0.0878715
1271.95	348.908	867.131	518.434	1136.65	769.065	480.289	437.295	899.278	894.236	963.438	510.996	670.352	573.386	787.949	420.368	131.592	88.5979	550.581	545.539	614.741	162.299	321.655	224.689	1.56122	0.832903	0.260732	0.175545	1.0909	1.08091	1.21803	0.321574	0.637316	0.445191	0.0407845	0.0847669	0.0555635	0.0474755	0.142573	0.173665	0.097406	0.0610618	0.0739426	0.120067	0.0139805	0.0909839	0.0583746	0.113645	0.0770405	0.0857247
1276.96	349.975	867.113	518.416	1136.43	767.861	480.228	437.758	896.82	894.923	961.024	509.24	670.584	572.731	787.729	419.164	131.531	89.0609	548.123	546.226	612.327	160.543	321.887	224.034	1.56078	0.830518	0.260611	0.176462	1.08603	1.08227	1.21324	0.318094	0.637776	0.443893	0.0403486	0.0823813	0.0554426	0.0483929	0.137703	0.175026	0.092623	0.0575825	0.0744023	0.118769	0.0138311	0.0884234	0.0582477	0.115841	0.0744089	0.0863966
1281.97	347.857	867.126	518.429	1135.18	770.274	480.428	438.526	898.604	896.113	964.432	509.763	672.214	574.858	786.483	421.577	131.731	89.8289	549.907	547.416	615.735	161.066	323.517	226.161	1.55831	0.835299	0.261007	0.177984	1.08957	1.08463	1.22	0.319131	0.641006	0.448108	0.0378798	0.0871623	0.0558389	0.0499146	0.141238	0.177384	0.0993755	0.0586188	0.077632	0.122983	0.0129848	0.0935551	0.058664	0.119484	0.0763189	0.0875604
1286.97	348.707	867.946	519.249	1135.96	770.088	480.655	438.104	896.435	895.695	962.612	510.328	670.296	574.012	787.262	421.391	131.958	89.4069	547.738	546.998	613.915	161.631	321.599	225.315	1.55985	0.83493	0.261457	0.177148	1.08527	1.0838	1.21639	0.32025	0.637205	0.446431	0.0394233	0.0867938	0.0562887	0.0490785	0.13694	0.176556	0.0957694	0.0597382	0.0738317	0.121307	0.0135139	0.0931595	0.0591365	0.117482	0.0739967	0.0871516
1291.98	348.646	869.068	520.371	1136.52	768.293	480.418	438.012	897.519	895.395	961.706	509.484	669.544	572.886	787.827	419.596	131.721	89.3149	548.822	546.698	613.009	160.787	320.847	224.189	1.56097	0.831374	0.260987	0.176966	1.08742	1.08321	1.2146	0.318578	0.635715	0.4442	0.0405427	0.0832372	0.0558191	0.0488962	0.139088	0.175961	0.0939743	0.058066	0.0723417	0.119076	0.0138976	0.0893421	0.0586432	0.117046	0.0751573	0.0868582
1296.99	348.699	865.976	517.279	1135.54	769.021	480.163	437.876	898.98	893.22	962.096	508.951	670.487	571.679	786.844	420.324	131.466	89.1789	550.283	544.523	613.399	160.254	321.79	222.982	1.55903	0.832816	0.260482	0.176696	1.09031	1.0789	1.21537	0.317522	0.637584	0.441809	0.0385951	0.0846797	0.0553138	0.0486267	0.141983	0.171652	0.094747	0.0570099	0.0742101	0.116685	0.01323	0.0908903	0.0581124	0.116401	0.0767215	0.084731
1302	348.392	867.019	518.322	1134.79	769.194	481.186	438.012	898.861	895.047	963.219	509.414	669.135	573.805	786.09	420.497	132.489	89.3149	550.164	546.35	614.522	160.717	320.438	225.108	1.55753	0.833159	0.262509	0.176966	1.09008	1.08252	1.21759	0.318439	0.634905	0.446021	0.0371011	0.0850225	0.0573408	0.0488962	0.141747	0.175272	0.0969721	0.0579273	0.0715313	0.120897	0.0127179	0.0912583	0.0602418	0.117046	0.0765941	0.0865178
1307	348.371	865.877	517.18	1135.83	768.697	480.275	437.778	898.794	895.671	963.857	509.966	669.354	574.501	787.136	420	131.578	89.0809	550.097	546.974	615.16	161.269	320.657	225.804	1.55961	0.832174	0.260704	0.176502	1.08994	1.08376	1.21886	0.319533	0.635339	0.4474	0.0391736	0.0840377	0.0555357	0.0484325	0.141614	0.176508	0.0982362	0.059021	0.0719652	0.122276	0.0134283	0.0902013	0.0583455	0.115936	0.0765223	0.0871281
1312.01	347.076	864.609	515.912	1132.01	766.968	480.479	437.659	897.774	895.628	960.104	509.32	669.325	573.821	783.31	418.271	131.782	88.9619	549.077	546.931	611.407	160.623	320.628	225.124	1.55202	0.828748	0.261108	0.176266	1.08792	1.08367	1.21142	0.318253	0.635282	0.446053	0.0315929	0.0806119	0.0559399	0.0481968	0.139593	0.176423	0.0908001	0.057741	0.0719078	0.120929	0.0108297	0.0865242	0.0587701	0.115372	0.0754303	0.0870861
1317.02	348.335	865.582	516.885	1134.5	767.888	479.685	437.225	898.2	894.891	961.626	508.941	670.664	572.464	785.8	419.191	130.988	88.5279	549.503	546.194	612.929	160.244	321.967	223.767	1.55696	0.830571	0.259535	0.175406	1.08877	1.08221	1.21444	0.317502	0.637935	0.443364	0.0365265	0.0824348	0.0543667	0.0473368	0.140437	0.174963	0.0938158	0.0569901	0.0745608	0.11824	0.0125209	0.0884808	0.0571173	0.113313	0.0758864	0.0863653
1322.03	347.715	865.135	516.438	1134	770.105	481.155	437.948	898.407	895.221	962.064	510.018	670.419	573.929	785.299	421.408	132.458	89.2509	549.71	546.524	613.367	161.321	321.722	225.232	1.55597	0.834964	0.262448	0.176839	1.08918	1.08286	1.21531	0.319636	0.637449	0.446267	0.0355338	0.0868275	0.0572793	0.0487694	0.140847	0.175617	0.0946836	0.059124	0.0740754	0.121143	0.0121806	0.0931957	0.0601773	0.116743	0.076108	0.086688
1327.04	348.464	865.853	517.156	1134.31	769.367	481.267	437.267	900.319	895.368	961.271	509.857	669.959	574.064	785.614	420.67	132.57	88.5699	551.622	546.671	612.574	161.16	321.262	225.367	1.55659	0.833502	0.26267	0.175489	1.09297	1.08316	1.21373	0.319317	0.636538	0.446535	0.036158	0.0853652	0.0575013	0.0474201	0.144636	0.175908	0.0931124	0.058805	0.073164	0.12141	0.0123946	0.0916262	0.0604105	0.113513	0.0781551	0.0868318
1332.04	347.935	864.273	515.576	1132.12	766.918	481.365	437.694	898.398	895.994	961.867	510.501	668.401	573.817	783.42	418.221	132.668	88.9969	549.701	547.297	613.17	161.804	319.704	225.12	1.55224	0.828649	0.262864	0.176335	1.08916	1.0844	1.21491	0.320593	0.633451	0.446045	0.0318109	0.0805129	0.0576954	0.0482661	0.14083	0.177148	0.0942933	0.060081	0.070077	0.120921	0.0109044	0.0864179	0.0606145	0.115538	0.0760983	0.0874441
1337.05	348.357	865.145	516.448	1132.97	769.109	481	436.901	900.007	898.499	961.905	509.478	670.216	572.908	784.275	420.412	132.303	88.2039	551.31	549.802	613.208	160.781	321.519	224.211	1.55394	0.83299	0.262141	0.174764	1.09235	1.08936	1.21499	0.318566	0.637047	0.444244	0.0335049	0.084854	0.0569722	0.0466949	0.144018	0.182111	0.0943686	0.0580541	0.0736732	0.11912	0.0114851	0.0910775	0.0598547	0.111777	0.077821	0.0898941
1342.06	347.784	864.091	515.394	1133.94	768.596	480.723	437.63	897.978	899.164	961.99	509.788	669.463	573.29	785.241	419.899	132.026	88.9329	549.281	550.467	613.293	161.091	320.766	224.593	1.55585	0.831974	0.261592	0.176209	1.08833	1.09068	1.21516	0.31918	0.635555	0.445001	0.0354189	0.0838376	0.0564234	0.0481393	0.139997	0.183429	0.094537	0.0586683	0.0721812	0.119877	0.0121412	0.0899865	0.0592781	0.115234	0.0756487	0.0905445
1347.07	348.505	863.314	514.617	1132.98	767.333	480.702	437.695	900.118	898.364	962.763	509.141	668.41	572.109	784.282	418.636	132.005	88.9979	551.421	549.667	614.066	160.444	319.713	223.412	1.55395	0.829471	0.26155	0.176337	1.09257	1.08909	1.21669	0.317898	0.633469	0.442661	0.0335188	0.0813351	0.0563818	0.0482681	0.144238	0.181844	0.0960686	0.0573863	0.0700948	0.117537	0.0114899	0.0873005	0.0592343	0.115543	0.0779399	0.089762
1352.07	348.007	864.179	515.481	1134.91	769.501	481.287	437.488	898.81	899.051	960.913	510.399	670.095	574.286	786.214	420.804	132.59	88.7909	550.113	550.354	612.216	161.702	321.398	225.589	1.55778	0.833767	0.262709	0.175927	1.08998	1.09045	1.21302	0.320391	0.636807	0.446974	0.0373468	0.0856307	0.0575409	0.0478579	0.141646	0.183205	0.092403	0.0598789	0.0734334	0.12185	0.0128021	0.0919111	0.0604521	0.114561	0.0765395	0.0904339
1357.08	348.414	861.929	513.231	1132.1	767.375	480.702	437.457	897.963	897.043	959.124	510.364	668.833	573.54	783.405	418.678	132.005	88.7599	549.266	548.346	610.427	161.667	320.136	224.843	1.55221	0.829555	0.26155	0.175866	1.0883	1.08647	1.20948	0.320321	0.634307	0.445496	0.0317811	0.0814183	0.0563818	0.0477965	0.139968	0.179227	0.0888584	0.0598096	0.070933	0.120372	0.0108942	0.0873898	0.0592343	0.114414	0.0756326	0.08847
1362.09	348.264	864.045	515.347	1133.67	768.582	480.656	438.551	901.783	900.747	961.414	510.686	668.828	574.488	784.973	419.885	131.959	89.8539	553.086	552.05	612.717	161.989	320.131	225.791	1.55532	0.831946	0.261459	0.178033	1.09587	1.09381	1.21402	0.320959	0.634297	0.447375	0.0348879	0.0838099	0.0562906	0.0499641	0.147537	0.186566	0.0933957	0.0604476	0.070923	0.12225	0.0119592	0.0899567	0.0591386	0.119603	0.0797225	0.0920927
1367.1	347.091	862.675	513.977	1133.09	767.739	481.418	438.28	900.867	899.345	959.398	510.223	669.723	573.2	784.389	419.042	132.721	89.5829	552.17	550.648	610.701	161.526	321.026	224.503	1.55416	0.830276	0.262969	0.177497	1.09405	1.09104	1.21002	0.320042	0.63607	0.444823	0.0337308	0.0821396	0.0578004	0.0494272	0.145722	0.183788	0.0894013	0.0595302	0.0726964	0.119698	0.0115626	0.0881639	0.0607248	0.118317	0.0787418	0.0907215
1372.1	348.201	861.294	512.596	1131.32	767.721	480.063	437.27	898.354	897.914	961.531	509.814	668.311	573.296	782.621	419.024	131.366	88.5729	549.657	549.217	612.834	161.117	319.614	224.599	1.55066	0.83024	0.260284	0.175495	1.08907	1.0882	1.21425	0.319232	0.633272	0.445013	0.0302277	0.0821039	0.0551157	0.047426	0.140742	0.180952	0.0936275	0.0587198	0.0698987	0.119889	0.0103618	0.0881256	0.0579042	0.113527	0.0760512	0.0893219
1377.11	346.916	862.79	514.093	1132.81	768.939	480.733	437.939	901.682	898.914	959.842	510.019	669.537	573.726	784.112	420.242	132.036	89.2419	552.985	550.217	611.145	161.322	320.84	225.029	1.55361	0.832653	0.261612	0.176821	1.09567	1.09018	1.2109	0.319638	0.635702	0.445865	0.033182	0.0845172	0.0564432	0.0487515	0.147336	0.182934	0.090281	0.059126	0.0723278	0.120741	0.0113744	0.0907159	0.0592989	0.1167	0.0796144	0.0902999
1382.12	346.807	862.036	513.339	1131.31	767.17	480.809	436.868	900.29	898.253	960.499	510.834	668.559	575.013	782.617	418.473	132.112	88.1709	551.593	549.556	611.802	162.137	319.862	226.316	1.55065	0.829148	0.261762	0.174699	1.09291	1.08887	1.2122	0.321253	0.633764	0.448415	0.0302198	0.0810122	0.0565938	0.0466295	0.144578	0.181624	0.0915828	0.0607408	0.0703901	0.123291	0.010359	0.0869538	0.0594571	0.11162	0.078124	0.0896535
1387.13	348.104	860.665	511.968	1131.93	766.058	480.014	436.096	901.656	900.233	960.744	510.087	668.472	572.575	783.238	417.361	131.317	87.3989	552.959	551.536	612.047	161.39	319.775	223.878	1.55188	0.826945	0.260187	0.173169	1.09561	1.0928	1.21269	0.319773	0.633591	0.443584	0.0314502	0.0788089	0.0550186	0.0450999	0.147285	0.185547	0.0920682	0.0592607	0.0702177	0.11846	0.0107808	0.084589	0.0578022	0.107959	0.0795865	0.09159
1392.13	347.769	861.923	513.225	1132.36	767.607	481.009	436.96	903.225	900.242	960.009	510.572	668.735	573.95	783.665	418.91	132.312	88.2629	554.528	551.545	611.312	161.875	320.038	225.253	1.55273	0.830014	0.262158	0.174881	1.09872	1.09281	1.21123	0.320734	0.634113	0.446309	0.0322963	0.081878	0.0569901	0.0468118	0.150394	0.185565	0.0906119	0.0602217	0.0707388	0.121184	0.0110708	0.0878832	0.0598734	0.112057	0.0812664	0.0915988
1397.14	347.009	861.028	512.331	1131.67	767.432	481.475	436.034	900.16	899.164	959.948	510.246	668.077	573.385	782.975	418.735	132.778	87.3369	551.463	550.467	611.251	161.549	319.38	224.688	1.55136	0.829668	0.263082	0.173046	1.09265	1.09068	1.21111	0.320088	0.632809	0.445189	0.0309291	0.0815313	0.0579134	0.044977	0.144321	0.183429	0.090491	0.0595758	0.069435	0.120065	0.0106022	0.087511	0.0608434	0.107665	0.0779848	0.0905445
1402.15	345.825	858.818	510.121	1129.46	766.572	480.87	436.428	899.476	899.641	958.967	509.879	665.988	574.019	780.765	417.875	132.173	87.7309	550.779	550.944	610.27	161.182	317.291	225.322	1.54698	0.827964	0.261883	0.173827	1.0913	1.09162	1.20917	0.31936	0.62867	0.446445	0.0265503	0.0798273	0.0567147	0.0457577	0.142966	0.184374	0.0885473	0.0588486	0.065296	0.121321	0.00910118	0.0856821	0.0595841	0.109533	0.0772525	0.091011
1407.16	346.953	860.024	511.327	1133.27	767.041	481.098	436.584	902.962	902.497	961.365	509.993	668.061	574.136	784.577	418.344	132.401	87.8869	554.265	553.8	612.668	161.296	319.364	225.439	1.55453	0.828893	0.262335	0.174136	1.0982	1.09728	1.21392	0.319586	0.632777	0.446677	0.0341033	0.0807566	0.0571664	0.0460668	0.149873	0.190033	0.0932986	0.0590745	0.0694033	0.121553	0.0116903	0.0866795	0.0600587	0.110273	0.0809848	0.0938043
1412.16	347.045	860.319	511.622	1132.93	767.21	481.526	439.132	904.37	900.635	960.751	512.058	669.513	576.05	784.229	418.513	132.829	90.4349	555.673	551.938	612.054	163.361	320.816	227.353	1.55385	0.829228	0.263183	0.179185	1.10099	1.09359	1.2127	0.323678	0.635654	0.45047	0.0334138	0.0810914	0.0580144	0.0511153	0.152662	0.186344	0.0920821	0.063166	0.0722803	0.125345	0.0114539	0.0870389	0.0609496	0.122358	0.0824923	0.0919832
1417.17	346.537	860.266	511.569	1132.99	767.124	480.733	436.857	903.202	900.403	959.679	509.812	668.26	573.151	784.293	418.427	132.036	88.1599	554.505	551.706	610.982	161.115	319.563	224.454	1.55397	0.829057	0.261612	0.174677	1.09868	1.09313	1.21058	0.319228	0.633171	0.444726	0.0335406	0.080921	0.0564432	0.0466077	0.150348	0.185884	0.089958	0.0587158	0.0697976	0.119601	0.0114974	0.086856	0.0592989	0.111568	0.0812417	0.0917563
1422.18	346.092	859.193	510.496	1128.11	766.323	479.723	436.447	900.939	897.952	958.311	510.494	666.762	573.16	779.411	417.626	131.026	87.7499	552.242	549.255	609.614	161.797	318.065	224.463	1.5443	0.82747	0.25961	0.173865	1.09419	1.08828	1.20787	0.320579	0.630203	0.444743	0.0238676	0.0793339	0.054442	0.0457953	0.145864	0.181028	0.0872475	0.0600671	0.0668295	0.119619	0.00818155	0.0851525	0.0571964	0.109623	0.0788189	0.0893591
1427.19	346.104	859.203	510.506	1128.32	765.531	480.423	436.181	900.356	898.021	960.235	511.132	667.254	573.805	779.627	416.834	131.726	87.4839	551.659	549.324	611.538	162.435	318.557	225.108	1.54473	0.825901	0.260997	0.173338	1.09304	1.08841	1.21168	0.321843	0.631178	0.446021	0.0242955	0.0777647	0.055829	0.0452683	0.144709	0.181164	0.0910597	0.0613312	0.0678044	0.120897	0.00832826	0.0834682	0.0586536	0.108362	0.0781947	0.0894266
1432.2	346.911	857.005	508.308	1128.24	765.8	480.939	437.46	900.691	898.993	961.068	511.383	665.633	574.874	779.543	417.103	132.242	88.7629	551.994	550.296	612.371	162.686	316.936	226.177	1.54456	0.826434	0.26202	0.175872	1.0937	1.09034	1.21333	0.32234	0.627966	0.448139	0.0241291	0.0782977	0.0568514	0.0478025	0.145373	0.18309	0.0927102	0.0618286	0.0645926	0.123015	0.0082712	0.0840403	0.0597277	0.114428	0.0785533	0.0903772
1437.2	345.948	855.881	507.184	1126.86	765.261	481.401	436.259	898.408	897.519	958.006	510.503	664.138	572.936	778.165	416.564	132.704	87.5619	549.711	548.822	609.309	161.806	315.441	224.239	1.54183	0.825366	0.262935	0.173492	1.08918	1.08742	1.20726	0.320597	0.625004	0.4443	0.0213988	0.0772297	0.0577668	0.0454228	0.140849	0.18017	0.0866432	0.060085	0.0616304	0.119175	0.00733528	0.082894	0.0606894	0.108732	0.0761091	0.0889356
1442.21	345.837	857.259	508.562	1130.25	766.842	481.596	438.159	902.541	902.448	962.33	511.478	665.709	575.08	781.557	418.145	132.899	89.4619	553.844	553.751	613.633	162.781	317.012	226.383	1.54855	0.828499	0.263321	0.177257	1.09737	1.09718	1.21583	0.322529	0.628117	0.448548	0.0281196	0.0803623	0.0581531	0.0491874	0.149038	0.189936	0.0952106	0.0620168	0.0647432	0.123423	0.0096391	0.0862563	0.0610953	0.117743	0.080534	0.0937564
1447.22	345.607	858.223	509.526	1129.62	766.074	481.837	439.555	903.685	904.006	963.839	512.405	666.581	576.885	780.921	417.377	133.14	90.8579	554.988	555.309	615.142	163.708	317.884	228.188	1.54729	0.826977	0.263799	0.180023	1.09963	1.10027	1.21882	0.324365	0.629845	0.452124	0.0268594	0.0788406	0.0586306	0.0519534	0.151305	0.193023	0.0982005	0.0638535	0.0664709	0.127	0.00920713	0.084623	0.061597	0.124364	0.0817589	0.0952802
1452.23	344.93	856.497	507.8	1125.86	766.096	480.762	438.377	902.985	903.072	959.793	512.099	665	575.898	777.161	417.399	132.065	89.6799	554.288	554.375	611.096	163.402	316.303	227.201	1.53984	0.82702	0.261669	0.177689	1.09825	1.09842	1.21081	0.323759	0.626712	0.450168	0.0194095	0.0788842	0.0565007	0.0496194	0.149918	0.191172	0.0901839	0.0632472	0.0633384	0.125044	0.00665337	0.0846698	0.0593592	0.118777	0.0810094	0.0943667
1457.23	346.041	857.07	508.373	1126.84	766.717	480.778	437.341	902.802	904.685	960.598	512.552	666.435	575.667	778.143	418.02	132.081	88.6439	554.105	555.988	611.901	163.855	317.738	226.97	1.54179	0.828251	0.261701	0.175636	1.09789	1.10162	1.2124	0.324657	0.629555	0.449711	0.0213552	0.0801146	0.0565324	0.0475667	0.149556	0.194368	0.0917789	0.0641448	0.0661816	0.124586	0.00732033	0.0859905	0.0593925	0.113864	0.0808135	0.0959442
1462.24	345.558	855.541	506.843	1127.81	766.102	480.875	437.262	902.618	903.604	959.797	511.584	666.466	574.902	779.112	417.405	132.178	88.5649	553.921	554.907	611.1	162.887	317.769	226.205	1.54371	0.827032	0.261893	0.17548	1.09752	1.09947	1.21081	0.322739	0.629617	0.448195	0.0232751	0.0788961	0.0567246	0.0474102	0.149191	0.192226	0.0901918	0.0622268	0.0662431	0.123071	0.00797847	0.0846825	0.0595945	0.113489	0.0806165	0.094887
1467.25	346.347	857.111	508.414	1126.78	765.808	480.596	438.34	903.156	904.311	958.97	512.346	665.396	576.459	778.087	417.111	131.899	89.6429	554.459	555.614	610.273	163.649	316.699	227.762	1.54168	0.82645	0.26134	0.177615	1.09859	1.10088	1.20917	0.324248	0.627497	0.45128	0.0212442	0.0783135	0.0561718	0.0495461	0.150257	0.193627	0.0885533	0.0637366	0.064123	0.126156	0.0072823	0.0840573	0.0590137	0.118602	0.0811925	0.0955785
1472.26	345.079	855.881	507.184	1126.93	764.898	482.181	438.388	901.51	902.875	958.646	513.189	666.581	576.484	778.236	416.201	133.484	89.6909	552.813	554.178	609.949	164.492	317.884	227.787	1.54197	0.824647	0.264481	0.177711	1.09533	1.09803	1.20853	0.325919	0.629845	0.451329	0.0215394	0.0765105	0.0593122	0.0496412	0.146996	0.190782	0.0879113	0.0654069	0.0664709	0.126205	0.0073835	0.082122	0.062313	0.118829	0.0794302	0.094174
1477.27	345.169	854.496	505.799	1126.57	764.66	481.62	437.681	902.773	901.607	957.722	512.885	665.509	574.802	777.877	415.963	132.923	88.9839	554.076	552.91	609.025	164.188	316.812	226.105	1.54126	0.824175	0.263369	0.17631	1.09783	1.09552	1.2067	0.325316	0.627721	0.447997	0.0208281	0.0760389	0.0582007	0.0482404	0.149498	0.18827	0.0860805	0.0648046	0.0643469	0.122873	0.00713967	0.0816159	0.0611453	0.115476	0.0807824	0.0929338
1482.27	344.557	854.96	506.263	1125.3	765.034	482.22	437.808	900.644	901.514	957.411	511.68	664.473	574.584	776.599	416.337	133.523	89.1109	551.947	552.817	608.714	162.983	315.776	225.887	1.53873	0.824916	0.264558	0.176561	1.09361	1.09533	1.20609	0.322929	0.625668	0.447565	0.0182959	0.07678	0.0593895	0.048492	0.14528	0.188085	0.0854643	0.062417	0.0622942	0.122441	0.00627166	0.0824112	0.0623942	0.116079	0.078503	0.0928429
1487.28	344.851	855.396	506.699	1123.73	765.516	482.165	437.498	900.975	902.202	956.951	511.817	663.065	574.456	775.032	416.819	133.468	88.8009	552.278	553.505	608.254	163.12	314.368	225.759	1.53562	0.825871	0.264449	0.175947	1.09427	1.0967	1.20517	0.3232	0.622878	0.447311	0.0151911	0.077735	0.0592805	0.0478778	0.145936	0.189448	0.0845529	0.0626885	0.0595044	0.122187	0.00520737	0.0834363	0.0622797	0.114608	0.0788574	0.0935158
1492.29	345.619	854.767	506.07	1126.51	766.096	481.878	437.944	903.721	903.097	960.194	513.55	663.859	575.462	777.816	417.399	133.181	89.2469	555.024	554.4	611.497	164.853	315.162	226.765	1.54114	0.82702	0.26388	0.176831	1.09971	1.09847	1.2116	0.326634	0.624451	0.449304	0.0207073	0.0788842	0.0587119	0.0487615	0.151376	0.191222	0.0909784	0.0661222	0.0610776	0.12418	0.00709824	0.0846698	0.0616823	0.116724	0.0817974	0.0943911
1497.3	345.674	853.734	505.037	1126.72	764.811	482.3	437.908	901.242	903.767	960.601	512.824	663.392	575.497	778.025	416.114	133.603	89.2109	552.545	555.07	611.904	164.127	314.695	226.8	1.54155	0.824474	0.264716	0.176759	1.09479	1.0998	1.21241	0.325196	0.623526	0.449374	0.0211214	0.0763381	0.059548	0.0486901	0.146465	0.192549	0.0917849	0.0646837	0.0601523	0.12425	0.00724019	0.081937	0.0625608	0.116553	0.0791433	0.0950464
1502.3	344.81	854.812	506.114	1126.65	766.932	483.654	436.974	904.903	902.793	962.077	513.073	666.612	575.599	777.952	418.235	134.957	88.2769	556.206	554.096	613.38	164.376	317.915	226.902	1.54141	0.828677	0.267399	0.174909	1.10205	1.09787	1.21533	0.325689	0.629906	0.449576	0.0209767	0.0805406	0.0622308	0.0468395	0.153718	0.190619	0.0947094	0.0651771	0.0665323	0.124452	0.00719061	0.0864477	0.0653793	0.112123	0.0830629	0.0940938
1507.31	345.577	855.402	506.705	1128.11	767.222	483.073	438.237	902.816	904.587	961.323	513.99	666.855	576.55	779.412	418.525	134.376	89.5399	554.119	555.89	612.626	165.293	318.158	227.853	1.5443	0.829251	0.266248	0.177411	1.09791	1.10142	1.21384	0.327506	0.630388	0.45146	0.0238695	0.0811152	0.0610796	0.049342	0.149583	0.194174	0.0932154	0.066994	0.0670138	0.126336	0.00818223	0.0870644	0.0641698	0.118113	0.0808285	0.0958484
1512.32	344.816	854.492	505.795	1126.19	764.841	482.2	437.871	903.618	905.367	961.031	512.41	665.493	575.744	777.489	416.144	133.503	89.1739	554.921	556.67	612.334	163.713	316.796	227.047	1.54049	0.824534	0.264518	0.176686	1.0995	1.10297	1.21326	0.324375	0.627689	0.449863	0.0200594	0.0763976	0.0593499	0.0486168	0.151172	0.195719	0.0926368	0.0638634	0.0643152	0.124739	0.00687614	0.0820008	0.0623526	0.116377	0.0816871	0.0966113
1517.33	345.392	854.215	505.518	1126.1	765.552	482.444	437.888	902.356	902.641	961.126	512.759	666.954	575.707	777.405	416.855	133.747	89.1909	553.659	553.944	612.429	164.062	318.257	227.01	1.54032	0.825943	0.265002	0.17672	1.097	1.09757	1.21345	0.325067	0.630584	0.44979	0.0198929	0.0778063	0.0598333	0.0486505	0.148672	0.190318	0.0928251	0.0645549	0.06721	0.124666	0.00681909	0.0835129	0.0628605	0.116458	0.080336	0.0939451
1522.33	344.382	852.733	504.036	1125.94	766.716	481.8	437.953	903.092	904.362	959.933	512.488	664.012	574.948	777.248	418.019	133.103	89.2559	554.395	555.665	611.236	163.791	315.315	226.251	1.54001	0.828249	0.263726	0.176849	1.09846	1.10098	1.21108	0.32453	0.624755	0.448286	0.0195819	0.0801126	0.0585573	0.0487793	0.15013	0.193728	0.0904613	0.064018	0.0613808	0.123162	0.00671246	0.0859883	0.06152	0.116766	0.081124	0.0956283
1527.34	345.665	853.823	505.126	1126.9	767.852	482.395	438.284	904.888	905.463	959.997	514.175	664.305	576.917	778.205	419.155	133.698	89.5869	556.191	556.766	611.3	165.478	315.608	228.22	1.54191	0.8305	0.264905	0.177504	1.10202	1.10316	1.21121	0.327872	0.625335	0.452187	0.021478	0.0823635	0.0597362	0.0494351	0.153689	0.19591	0.0905881	0.0673605	0.0619613	0.127063	0.00736244	0.0884042	0.0627585	0.118336	0.0830468	0.0967052
1532.35	344.222	854.384	505.687	1125.99	766.124	482.998	438.395	904.171	903.799	961.454	513.688	665.839	575.528	777.296	417.427	134.301	89.6979	555.474	555.102	612.757	164.991	317.142	226.831	1.54011	0.827076	0.266099	0.177724	1.1006	1.09986	1.2141	0.326907	0.628375	0.449435	0.019677	0.0789397	0.060931	0.049655	0.152268	0.192613	0.093475	0.0663956	0.0650007	0.124311	0.00674506	0.0847293	0.0640137	0.118863	0.0822792	0.0950777
1537.36	343.625	852.767	504.07	1125.54	765.364	482.455	438.182	902.045	903.302	961.167	514.509	663.493	577.75	776.84	416.667	133.758	89.4849	553.348	554.605	612.47	165.812	314.796	229.053	1.53921	0.82557	0.265023	0.177302	1.09639	1.09888	1.21353	0.328534	0.623726	0.453838	0.0187735	0.0774338	0.0598551	0.049233	0.148056	0.191628	0.0929063	0.0680223	0.0603524	0.128714	0.00643535	0.083113	0.0628834	0.117852	0.080003	0.0945916
1542.37	344.237	852.09	503.393	1124.76	765.99	481.844	438.789	901.766	903.849	960.602	513.527	663.331	575.799	776.063	417.293	133.147	90.0919	553.069	555.152	611.905	164.83	314.634	227.102	1.53767	0.82681	0.263813	0.178505	1.09583	1.09996	1.21241	0.326588	0.623405	0.449972	0.0172339	0.0786742	0.0586445	0.0504357	0.147503	0.192712	0.0917868	0.0660766	0.0600315	0.124848	0.00590761	0.0844443	0.0616115	0.120731	0.0797043	0.0951266
1547.37	343.505	852.961	504.264	1125.55	765.074	481.788	438.03	901.682	905.309	961.962	512.541	664.62	574.198	776.853	416.377	133.091	89.3329	552.985	556.612	613.265	163.844	315.923	225.501	1.53923	0.824996	0.263702	0.177001	1.09567	1.10285	1.2151	0.324635	0.625959	0.4468	0.0187992	0.0768592	0.0585336	0.0489318	0.147336	0.195605	0.0944815	0.064123	0.0625855	0.121676	0.00644418	0.0824963	0.061495	0.117131	0.0796144	0.0965545
1552.38	343.772	852.027	503.33	1123.91	764.877	482.442	438.221	904.993	904.103	961.062	513.794	664.703	576.476	775.21	416.18	133.745	89.5239	556.296	555.406	612.365	165.097	316.006	227.779	1.53598	0.824605	0.264998	0.17738	1.10223	1.10046	1.21332	0.327118	0.626124	0.451314	0.0155438	0.0764689	0.0598294	0.0493103	0.153897	0.193215	0.0926983	0.0666056	0.0627499	0.126189	0.00532826	0.0820773	0.0628563	0.118037	0.0831593	0.095375
1557.39	344.798	852.515	503.818	1124.92	767.047	482.172	438.522	906.347	905.359	960.509	513.692	664.648	579.036	776.226	418.35	133.475	89.8249	557.65	556.662	611.812	164.995	315.951	230.339	1.53799	0.828905	0.264463	0.177976	1.10491	1.10295	1.21222	0.326915	0.626015	0.456386	0.0175569	0.0807685	0.0592944	0.0499067	0.15658	0.195704	0.0916026	0.0664035	0.0626409	0.131262	0.00601832	0.0866923	0.0622943	0.119465	0.0846089	0.0966034
1562.4	343.767	853.33	504.633	1125.51	766.403	482.658	438.536	905.614	908.177	962.274	515.061	663.96	578.704	776.815	417.706	133.961	89.8389	556.917	559.48	613.577	166.364	315.263	230.007	1.53916	0.827629	0.265426	0.178004	1.10346	1.10854	1.21572	0.329628	0.624652	0.455728	0.0187239	0.0794925	0.0602573	0.0499344	0.155127	0.201287	0.0950997	0.069116	0.0612777	0.130604	0.00641837	0.0853227	0.063306	0.119531	0.0838241	0.0993596
1567.4	344.215	852.755	504.058	1123.48	766.679	483.432	438.522	903.37	909.803	961.146	514.907	664.466	577.812	774.781	417.982	134.735	89.8249	554.673	561.106	612.449	166.21	315.769	229.115	1.53513	0.828176	0.266959	0.177976	1.09901	1.11176	1.21349	0.329323	0.625654	0.453961	0.0146938	0.0800393	0.0617909	0.0499067	0.150681	0.204509	0.0928647	0.0688109	0.0622803	0.128836	0.00503689	0.0859096	0.0649171	0.119465	0.0814216	0.10095
1572.41	343.837	852.054	503.356	1124.84	765.14	483.187	438.428	905.279	906.067	962.837	513.377	665.945	577.18	776.145	416.443	134.49	89.7309	556.582	557.37	614.14	164.68	317.248	228.483	1.53783	0.825126	0.266474	0.17779	1.10279	1.10435	1.21684	0.326291	0.628585	0.452708	0.0173964	0.07699	0.0613055	0.0497204	0.154463	0.197106	0.0962152	0.0657794	0.0652108	0.127584	0.00596331	0.0826367	0.0644071	0.119019	0.0834655	0.0972959
1577.42	344.303	851.501	502.804	1124.56	765.471	483.185	439.67	905.108	907.685	961.404	514.544	665.753	578.109	775.865	416.774	134.488	90.9729	556.411	558.988	612.707	165.847	317.056	229.412	1.53727	0.825782	0.26647	0.180251	1.10245	1.10756	1.214	0.328604	0.628204	0.454549	0.0168416	0.0776458	0.0613015	0.0521813	0.154125	0.200312	0.0933759	0.0680917	0.0648303	0.129425	0.00577313	0.0833406	0.064403	0.12491	0.0832824	0.0988784
1582.43	343.722	853.379	504.682	1124.21	766.356	483.355	438.762	905.881	907.048	961.692	513.902	664.176	577.824	775.517	417.659	134.658	90.0649	557.184	558.351	612.995	165.205	315.479	229.127	1.53658	0.827536	0.266807	0.178452	1.10399	1.1063	1.21457	0.327332	0.62508	0.453984	0.0161521	0.0793993	0.0616384	0.0503822	0.155656	0.19905	0.0939465	0.0668196	0.0617057	0.12886	0.00553678	0.0852227	0.0647569	0.120603	0.08411	0.0982554
1587.43	343.779	853.333	504.636	1124.91	767.535	483.439	439.524	906.653	906.746	961.905	515.475	665.062	578.68	776.21	418.838	134.742	90.8269	557.956	558.049	613.208	166.778	316.365	229.983	1.53796	0.829872	0.266973	0.179961	1.10552	1.1057	1.21499	0.330448	0.626835	0.455681	0.0175252	0.0817354	0.0618048	0.051892	0.157186	0.198452	0.0943686	0.0699363	0.0634612	0.130556	0.00600746	0.0877301	0.0649317	0.124217	0.0849365	0.09796
1592.44	343.359	850.545	501.847	1122.2	765.144	482.187	437.966	906.323	907.5	961.83	513.238	662.985	576.331	773.503	416.447	133.49	89.2689	557.626	558.803	613.133	164.541	314.288	227.634	1.53259	0.825134	0.264492	0.176874	1.10486	1.10719	1.21484	0.326016	0.62272	0.451026	0.0121616	0.0769979	0.0593241	0.048805	0.156532	0.199946	0.09422	0.065504	0.0593459	0.125902	0.00416888	0.0826452	0.0623255	0.116828	0.0845832	0.0986974
1597.45	344.37	851.119	502.422	1122.67	765.659	483.952	439.344	905.86	908.828	961.133	513.54	664.073	575.407	773.972	416.962	135.255	90.6469	557.163	560.131	612.436	164.843	315.376	226.71	1.53352	0.826155	0.26799	0.179605	1.10394	1.10982	1.21346	0.326614	0.624875	0.449196	0.0130909	0.0780183	0.0628212	0.0515354	0.155615	0.202577	0.0928389	0.0661024	0.0615016	0.124071	0.00448742	0.0837404	0.0659996	0.123364	0.0840875	0.0999963
1602.46	344.664	851.306	502.608	1124.78	765.601	484.159	438.774	906.792	910.382	963.2	514.833	664.12	577.362	776.086	416.904	135.462	90.0769	558.095	561.685	614.503	166.136	315.423	228.665	1.53771	0.82604	0.2684	0.178475	1.10579	1.1129	1.21756	0.329176	0.624969	0.453069	0.0172795	0.0779034	0.0632314	0.050406	0.157461	0.205656	0.0969344	0.0686643	0.0615948	0.127945	0.00592324	0.0836171	0.0664305	0.12066	0.0850854	0.101516
1607.46	344.226	851.6	502.903	1122.48	766.804	484.404	438.558	907.634	908.898	961.09	515.2	662.108	577.543	773.788	418.107	135.707	89.8609	558.937	560.201	612.393	166.503	313.411	228.846	1.53316	0.828423	0.268885	0.178047	1.10746	1.10996	1.21338	0.329903	0.620982	0.453428	0.0127263	0.080287	0.0637168	0.049978	0.15913	0.202716	0.0927538	0.0693914	0.0576083	0.128303	0.00436245	0.0861755	0.0669405	0.119636	0.0859868	0.100065
1612.47	343.211	850.936	502.238	1122.04	767.551	484.217	438.824	909.182	907.849	962.275	515.47	663.852	579.225	773.339	418.854	135.52	90.1269	560.485	559.152	613.578	166.773	315.155	230.528	1.53227	0.829903	0.268515	0.178574	1.11053	1.10789	1.21572	0.330438	0.624438	0.45676	0.0118367	0.0817671	0.0633463	0.0505051	0.162197	0.200637	0.0951017	0.0699264	0.0610638	0.131636	0.00405749	0.0877641	0.0665512	0.120897	0.0876442	0.0990388
1617.48	343.801	851.318	502.621	1122.43	766.334	483.727	439.124	907.297	909.409	962.697	515.515	661.413	578.433	773.733	417.637	135.03	90.4269	558.6	560.712	614	166.818	312.716	229.736	1.53305	0.827492	0.267544	0.179169	1.10679	1.11098	1.21656	0.330527	0.619605	0.455191	0.0126173	0.0793557	0.0623754	0.0510995	0.158462	0.203728	0.0959378	0.0700156	0.0562312	0.130067	0.0043251	0.0851759	0.0655312	0.12232	0.085626	0.100565
1622.49	342.86	849.579	500.882	1121.72	766.51	482.867	439.125	906.855	907.267	962.025	515.536	661.766	578.456	773.02	417.813	134.17	90.4279	558.158	558.57	613.328	166.839	313.069	229.759	1.53164	0.827841	0.26584	0.179171	1.10592	1.10673	1.21523	0.330569	0.620304	0.455237	0.0112046	0.0797045	0.0606714	0.0511014	0.157586	0.199484	0.0946063	0.0700572	0.0569306	0.130112	0.00384083	0.0855502	0.063741	0.122325	0.0851528	0.0984696
1627.49	343.588	850.614	501.917	1124.33	766.194	484.277	438.113	907.246	908.681	958.395	516.052	662.908	578.738	775.628	417.497	135.58	89.4159	558.549	559.984	609.698	167.355	314.211	230.041	1.5368	0.827215	0.268633	0.177166	1.10669	1.10953	1.20804	0.331591	0.622567	0.455795	0.016372	0.0790784	0.0634652	0.0490963	0.158361	0.202286	0.087414	0.0710796	0.0591933	0.130671	0.00561217	0.0848782	0.0666761	0.117525	0.0855714	0.0998525
1632.5	343.388	850.274	501.577	1121.23	766.084	483.434	438.413	909.216	909.676	960.879	514.831	662.803	577.071	772.531	417.387	134.737	89.7159	560.519	560.979	612.182	166.134	314.106	228.374	1.53067	0.826997	0.266963	0.17776	1.11059	1.11151	1.21296	0.329172	0.622359	0.452492	0.0102357	0.0788604	0.0617949	0.0496907	0.162264	0.204257	0.0923357	0.0686603	0.0589853	0.127368	0.00350871	0.0846443	0.0649213	0.118948	0.0876806	0.100826
1637.51	343.935	850.688	501.991	1121.22	765.71	482.772	438.486	907.649	909.718	962.234	516.141	663.158	578.453	772.519	417.013	134.075	89.7889	558.952	561.021	613.537	167.444	314.461	229.756	1.53064	0.826256	0.265652	0.177905	1.10749	1.11159	1.21564	0.331768	0.623062	0.455231	0.010212	0.0781194	0.0604832	0.0498354	0.159159	0.20434	0.0950204	0.0712559	0.0596887	0.130106	0.00350056	0.0838489	0.0635433	0.119294	0.0860029	0.100867
1642.52	342.898	849.942	501.244	1122.01	766.789	484.119	437.731	906.711	907.463	959.389	514.837	663.073	576.655	773.309	418.092	135.422	89.0339	558.014	558.766	610.692	166.14	314.376	227.958	1.53221	0.828394	0.26832	0.176409	1.10563	1.10712	1.21	0.329184	0.622894	0.451668	0.0117772	0.0802573	0.0631521	0.0483394	0.157301	0.199872	0.0893834	0.0686722	0.0595203	0.126544	0.00403712	0.0861436	0.0663472	0.115713	0.0849986	0.0986613
1647.53	343.112	850.188	501.49	1122	766.988	483.927	438.868	907.175	908.609	960.013	515.158	662.939	576.821	773.304	418.291	135.23	90.1709	558.478	559.912	611.316	166.461	314.242	228.124	1.5322	0.828788	0.26794	0.178662	1.10655	1.10939	1.21124	0.32982	0.622629	0.451997	0.0117673	0.0806516	0.0627717	0.0505922	0.15822	0.202143	0.0906198	0.0693082	0.0592548	0.126873	0.00403372	0.0865668	0.0659475	0.121106	0.0854954	0.0997821
1652.53	343.273	849.059	500.362	1119.79	766.166	483.772	438.442	906.074	909.248	957.237	514.589	661.713	577.288	771.097	417.469	135.075	89.7449	557.377	560.551	608.54	165.892	313.016	228.591	1.52783	0.827159	0.267633	0.177818	1.10437	1.11066	1.20574	0.328693	0.620199	0.452922	0.00739446	0.0790229	0.0624646	0.0497482	0.156039	0.203409	0.0851195	0.0681808	0.0568256	0.127798	0.00253475	0.0848186	0.0656249	0.119086	0.0843166	0.100407
1657.54	342.888	847.08	498.383	1121.57	767.391	484.339	437.968	907.444	910.114	958.385	513.967	661.148	576.321	772.871	418.694	135.642	89.2709	558.747	561.417	609.688	165.27	312.451	227.624	1.53134	0.829586	0.268756	0.176878	1.10708	1.11237	1.20802	0.32746	0.61908	0.451006	0.0109094	0.08145	0.063588	0.048809	0.158753	0.205125	0.0873942	0.0669484	0.0557061	0.125882	0.00373963	0.0874238	0.0668052	0.116837	0.0857834	0.101254
1662.55	342.538	848.512	499.815	1122.78	767.697	483.844	439.109	906.227	908.256	960.425	515.169	662.43	577.833	774.08	419	135.147	90.4119	557.53	559.559	611.728	166.472	313.733	229.136	1.53374	0.830193	0.267776	0.179139	1.10467	1.10869	1.21206	0.329842	0.62162	0.454002	0.0133049	0.0820563	0.0626072	0.0510697	0.156342	0.201444	0.0914361	0.06933	0.0582463	0.128878	0.00456078	0.0880746	0.0657748	0.122249	0.0844804	0.0994368
1667.56	342.737	846.588	497.891	1120.67	767.216	484.355	438.711	904.051	908.717	957.827	514.828	660.531	578.351	771.975	418.519	135.658	90.0139	555.354	560.02	609.13	166.131	311.834	229.654	1.52957	0.82924	0.268788	0.178351	1.10036	1.10961	1.20691	0.329166	0.617857	0.455029	0.0091341	0.0811033	0.0636197	0.0502812	0.15203	0.202357	0.0862885	0.0686544	0.0544836	0.129904	0.00313108	0.0870517	0.0668385	0.120361	0.0821507	0.0998877
1672.57	342.127	846.843	498.146	1122	766.078	484.067	439.04	904.82	905.757	958.176	515.05	662.484	578.271	773.304	417.381	135.37	90.3429	556.123	557.06	609.479	166.353	313.787	229.574	1.5322	0.826985	0.268217	0.179002	1.10188	1.10374	1.2076	0.329606	0.621727	0.45487	0.0117673	0.0788485	0.0630491	0.050933	0.153554	0.196492	0.08698	0.0690942	0.0583533	0.129746	0.00403372	0.0846315	0.066239	0.121922	0.082974	0.0969927
1677.57	341.949	847.092	498.395	1120.38	765.783	484.475	437.89	904.406	906.658	960.115	515.229	660.67	577.484	771.683	417.086	135.778	89.1929	555.709	557.961	611.418	166.532	311.973	228.787	1.52899	0.8264	0.269026	0.176724	1.10106	1.10553	1.21144	0.329961	0.618133	0.453311	0.00855554	0.078264	0.0638575	0.0486545	0.152734	0.198277	0.0908219	0.0694489	0.054759	0.128187	0.00293275	0.0840041	0.0670883	0.116467	0.0825308	0.0978739
1682.58	342.742	847.192	498.494	1120.52	766.654	483.557	439.077	905.316	908.198	960.908	515.621	660.857	578.093	771.822	417.957	134.86	90.3799	556.619	559.501	612.211	166.924	312.16	229.396	1.52926	0.828126	0.267207	0.179076	1.10287	1.10858	1.21301	0.330737	0.618503	0.454517	0.00883095	0.0799898	0.0620386	0.0510063	0.154537	0.201329	0.0923931	0.0702256	0.0551296	0.129393	0.00302716	0.0858565	0.0651773	0.122097	0.0835051	0.0993801
1687.59	342.076	848.857	500.16	1121.85	767.072	483.87	439.216	906.437	908.651	962.013	515.657	663.325	578.638	773.152	418.375	135.173	90.5189	557.74	559.954	613.316	166.96	314.628	229.941	1.5319	0.828954	0.267827	0.179351	1.10509	1.10947	1.2152	0.330809	0.623393	0.455597	0.0114662	0.080818	0.0626588	0.0512818	0.156758	0.202226	0.0945826	0.0702969	0.0600196	0.130473	0.00393049	0.0867454	0.0658289	0.122757	0.0847053	0.0998232
1692.6	342.012	848.757	500.06	1121.66	766.912	484.416	438.591	904.789	909.708	958.778	516.799	661.683	577.833	772.961	418.215	135.719	89.8939	556.092	561.011	610.081	168.102	312.986	229.136	1.53152	0.828637	0.268909	0.178113	1.10182	1.11157	1.20879	0.333072	0.62014	0.454002	0.0110877	0.080501	0.0637406	0.0500434	0.153493	0.204321	0.0881728	0.0725597	0.0567662	0.128878	0.00380076	0.0864052	0.0669654	0.119792	0.0829409	0.100857
1697.6	343.038	848.826	500.129	1120.16	765.751	483.66	438.056	906.682	909.403	958.143	515.118	661.243	577.206	771.461	417.054	134.963	89.3589	557.985	560.706	609.446	166.421	312.546	228.509	1.52855	0.826337	0.267411	0.177053	1.10557	1.11096	1.20754	0.329741	0.619268	0.45276	0.00811568	0.0782006	0.0622427	0.0489834	0.157243	0.203716	0.0869147	0.069229	0.0558944	0.127636	0.00278197	0.0839361	0.0653917	0.117255	0.0849676	0.100559
1702.61	342.777	848.055	499.357	1120.46	766.118	484.248	439.452	907.284	909.532	958.018	515.025	661.62	577.182	771.763	417.421	135.551	90.7549	558.587	560.835	609.321	166.328	312.923	228.485	1.52915	0.827064	0.268576	0.179819	1.10677	1.11122	1.20729	0.329557	0.620015	0.452712	0.00871405	0.0789278	0.0634077	0.0517494	0.158436	0.203972	0.086667	0.0690447	0.0566413	0.127588	0.00298709	0.0847166	0.0666157	0.123876	0.0856121	0.100685
1707.62	342.866	847.975	499.278	1121.89	766.591	483.876	439.736	907.782	910.954	959.669	515.577	663.55	578.365	773.191	417.894	135.179	91.0389	559.085	562.257	610.972	166.88	314.853	229.668	1.53198	0.828001	0.267839	0.180381	1.10775	1.11404	1.21056	0.33065	0.623839	0.455056	0.0115434	0.079865	0.0626706	0.0523121	0.159423	0.206789	0.0899382	0.0701384	0.0604654	0.129932	0.00395697	0.0857225	0.0658414	0.125223	0.0861453	0.102076
1712.63	342.803	848.036	499.339	1121.99	767.025	484.329	438.396	906.715	911.288	959.303	515.944	660.661	577.386	773.294	418.328	135.632	89.6989	558.018	562.591	610.606	167.247	311.964	228.689	1.53218	0.828861	0.268737	0.177726	1.10564	1.1147	1.20983	0.331377	0.618115	0.453117	0.0117475	0.0807249	0.0635682	0.049657	0.157309	0.207451	0.089213	0.0708656	0.0547412	0.127992	0.00402693	0.0866455	0.0667843	0.118867	0.0850029	0.102402
1717.63	342.597	846.876	498.179	1122.87	766.67	484.909	437.695	907.526	910.866	961.345	516.247	661.744	578.07	774.17	417.973	136.212	88.9979	558.829	562.169	612.648	167.55	313.047	229.373	1.53391	0.828158	0.269886	0.176337	1.10725	1.11386	1.21388	0.331978	0.620261	0.454472	0.0134832	0.0800215	0.0647174	0.0482681	0.158916	0.206615	0.093259	0.0714659	0.056887	0.129348	0.0046219	0.0858905	0.0679917	0.115543	0.0858712	0.10199
1722.64	341.238	846.058	497.361	1121.96	766.413	484.846	437.099	904.208	909.679	958.553	515.775	661.63	578.013	773.262	417.716	136.149	88.4019	555.511	560.982	609.856	167.078	312.933	229.316	1.53212	0.827649	0.269761	0.175157	1.10067	1.11151	1.20835	0.331043	0.620035	0.454359	0.0116841	0.0795123	0.0645926	0.0470872	0.152341	0.204263	0.087727	0.0705307	0.0566612	0.129235	0.0040052	0.0853439	0.0678605	0.112716	0.0823188	0.100829
1727.65	342.527	846.425	497.727	1121.37	766.788	484.929	438.233	904.191	911.923	957.926	515.339	661.581	576.188	772.67	418.091	136.232	89.5359	555.494	563.226	609.229	166.642	312.884	227.491	1.53094	0.828392	0.269925	0.177403	1.10064	1.11596	1.20711	0.330179	0.619938	0.450743	0.0105112	0.0802553	0.064757	0.0493341	0.152308	0.208709	0.0864847	0.0696669	0.0565641	0.125619	0.00360312	0.0861414	0.0680333	0.118094	0.0823006	0.103023
1732.66	342.035	845.865	497.168	1123.19	766.098	485.418	439.658	906.938	912.335	958.862	516.17	662.595	576.472	774.498	417.401	136.721	90.9609	558.241	563.638	610.165	167.473	313.898	227.775	1.53456	0.827024	0.270894	0.180227	1.10608	1.11677	1.20896	0.331825	0.621947	0.451306	0.0141331	0.0788881	0.0657259	0.0521575	0.157751	0.209526	0.0883393	0.0713134	0.0585732	0.126181	0.00484468	0.084674	0.0690512	0.124853	0.0852417	0.103426
1737.66	341.955	845.593	496.896	1120.74	765.612	486.364	439.007	906.721	910.906	958.016	516.473	660.556	577.982	772.044	416.915	137.667	90.3099	558.024	562.209	609.319	167.776	311.859	229.285	1.5297	0.826061	0.272769	0.178937	1.10565	1.11394	1.20728	0.332426	0.617907	0.454298	0.00927082	0.0779252	0.0676003	0.0508676	0.157321	0.206694	0.086663	0.0719137	0.0545332	0.129173	0.00317794	0.0836405	0.0710204	0.121765	0.0850093	0.102029
1742.67	342.378	843.91	495.213	1121.37	766.294	486.248	438.938	906.638	908.97	958.012	516.061	660.447	576.408	772.673	417.597	137.551	90.2409	557.941	560.273	609.315	167.364	311.75	227.711	1.53095	0.827413	0.272539	0.1788	1.10549	1.11011	1.20728	0.331609	0.617691	0.451179	0.0105171	0.0792765	0.0673705	0.0507309	0.157156	0.202858	0.0866551	0.0710974	0.0543172	0.126055	0.00360515	0.0850909	0.070779	0.121438	0.0849205	0.100135
1747.68	342.443	844.62	495.923	1122.79	764.218	485.253	438.577	904.742	907.247	957.704	516.291	659.348	577.212	774.09	415.521	136.556	89.8799	556.045	558.55	609.007	167.594	310.651	228.515	1.53376	0.823299	0.270567	0.178085	1.10173	1.10669	1.20667	0.332065	0.615513	0.452772	0.0133247	0.0751632	0.065399	0.0500157	0.153399	0.199444	0.0860448	0.0715531	0.0521397	0.127648	0.00456757	0.0806759	0.0687078	0.119726	0.0828905	0.09845
1752.69	342.14	844.421	495.724	1122.2	766.102	485.826	439.318	905.914	909.419	957.123	515.133	658.022	575.692	773.503	417.405	137.129	90.6209	557.217	560.722	608.426	166.436	309.325	226.995	1.53259	0.827032	0.271703	0.179553	1.10405	1.111	1.20552	0.329771	0.612886	0.44976	0.0121616	0.0788961	0.0665343	0.0514838	0.155722	0.203748	0.0848937	0.0692587	0.0495124	0.124636	0.00416888	0.0846825	0.0699005	0.12324	0.0841453	0.100574
1757.69	341.318	844.236	495.539	1118.96	766.342	486.412	437.685	903.799	907.691	954.383	515.447	659.649	575.367	770.265	417.645	137.715	88.9879	555.102	558.994	605.686	166.75	310.952	226.67	1.52618	0.827508	0.272864	0.176318	1.09986	1.10757	1.20009	0.330393	0.61611	0.449116	0.00574597	0.0793716	0.0676954	0.0482483	0.151531	0.200324	0.0794647	0.0698808	0.0527361	0.123992	0.00196966	0.0851929	0.0711203	0.115495	0.0818809	0.0988842
1762.7	341.464	843.863	495.166	1121.36	765.114	485.667	438.764	902.733	907.234	954.948	516.179	658.982	576.67	772.662	416.417	136.97	90.0669	554.036	558.537	606.251	167.482	310.285	227.973	1.53093	0.825075	0.271388	0.178456	1.09775	1.10667	1.20121	0.331843	0.614788	0.451698	0.0104953	0.0769385	0.0662193	0.0503862	0.149419	0.199419	0.0805842	0.0713312	0.0514145	0.126574	0.00359768	0.0825814	0.0695695	0.120613	0.0807396	0.0984373
1767.71	342.052	843.776	495.079	1120.98	766.082	485.644	438.273	903.164	909.267	953.573	516.404	659.978	575.581	772.287	417.385	136.947	89.5759	554.467	560.57	604.876	167.707	311.281	226.884	1.53018	0.826993	0.271342	0.177483	1.0986	1.11069	1.19848	0.332289	0.616762	0.44954	0.00975229	0.0788564	0.0661737	0.0494133	0.150273	0.203447	0.0778598	0.071777	0.0533879	0.124416	0.00334298	0.08464	0.0695217	0.118284	0.0812011	0.100426
1772.72	341.651	843.287	494.59	1119.56	765.923	485.871	437.834	904.572	907.952	955.426	515.962	657.58	576.237	770.865	417.226	137.174	89.1369	555.875	559.255	606.729	167.265	308.883	227.54	1.52737	0.826678	0.271792	0.176613	1.10139	1.10809	1.20215	0.331413	0.61201	0.45084	0.00693479	0.0785414	0.0666235	0.0485435	0.153063	0.200841	0.0815313	0.0709012	0.0486366	0.125716	0.00237717	0.0843019	0.0699942	0.116202	0.0827085	0.0991395
1777.73	341.572	841.126	492.429	1119.46	766.34	485.782	438.783	903.335	906.474	954.041	515.158	657.306	574.886	770.76	417.643	137.085	90.0859	554.638	557.777	605.344	166.461	308.609	226.189	1.52716	0.827504	0.271615	0.178493	1.09894	1.10516	1.19941	0.32982	0.611468	0.448163	0.00672674	0.0793676	0.0664471	0.0504238	0.150612	0.197913	0.0787871	0.0693082	0.0480937	0.123039	0.00230586	0.0851887	0.0698089	0.120703	0.0813841	0.097694
1782.73	341.161	842.096	493.399	1120.4	764.248	486.015	438.177	903.146	907.418	956.12	515.51	655.558	574.652	771.707	415.551	137.318	89.4799	554.449	558.721	607.423	166.813	306.861	225.955	1.52903	0.823359	0.272077	0.177292	1.09857	1.10703	1.20353	0.330518	0.608004	0.4477	0.0086031	0.0752226	0.0669088	0.0492231	0.150237	0.199783	0.0829064	0.0700057	0.0446303	0.122575	0.00294905	0.0807397	0.0702939	0.117829	0.0811818	0.0986172
1787.74	341.422	841.825	493.128	1120.29	766.223	485.506	437.957	904.398	907.004	957.108	515.345	657.482	574.521	771.591	417.526	136.809	89.2599	555.701	558.307	608.411	166.648	308.785	225.824	1.5288	0.827272	0.271069	0.176857	1.10105	1.10621	1.20549	0.330191	0.611816	0.44744	0.00837326	0.0791358	0.0659003	0.0487872	0.152718	0.198963	0.0848639	0.0696787	0.0484425	0.122316	0.00287027	0.0849399	0.0692344	0.116785	0.0825222	0.0982123
1792.75	341.408	843.154	494.457	1120.79	765.442	486.893	437.861	904.921	907.973	956.746	515.726	657.466	573.222	772.094	416.745	138.196	89.1639	556.224	559.276	608.049	167.029	308.769	224.525	1.5298	0.825725	0.273817	0.176666	1.10208	1.10813	1.20477	0.330946	0.611785	0.444866	0.00936989	0.0775884	0.0686484	0.048597	0.153754	0.200883	0.0841467	0.0704336	0.0484107	0.119742	0.0032119	0.0832789	0.0721216	0.11633	0.0830822	0.0991601
1797.76	341.347	841.954	493.257	1121.08	766.918	485.896	438.646	905.494	908.798	955.47	516.352	657.268	574.97	772.384	418.221	137.199	89.9489	556.797	560.101	606.773	167.655	308.571	226.273	1.53038	0.828649	0.271841	0.178222	1.10322	1.10977	1.20224	0.332186	0.611392	0.44833	0.00994448	0.0805129	0.066673	0.0501524	0.154889	0.202518	0.0816185	0.071674	0.0480184	0.123205	0.00340887	0.0864179	0.0700462	0.120053	0.0836957	0.0999669
1802.76	341.603	843.737	495.04	1122.5	769.021	486.593	439.383	907.208	910.252	958.003	516.46	658.361	575.001	773.804	420.324	137.896	90.6859	558.511	561.555	609.306	167.763	309.664	226.304	1.53319	0.832816	0.273222	0.179682	1.10662	1.11265	1.20726	0.3324	0.613558	0.448391	0.012758	0.0846797	0.068054	0.0516126	0.158285	0.205398	0.0866373	0.071888	0.0501841	0.123267	0.00437332	0.0908903	0.0714971	0.123549	0.0855307	0.101389
1807.77	341.671	844.608	495.911	1123.36	767.359	486.906	438.537	905.823	911.068	957.392	516.324	655.996	576.25	774.66	418.662	138.209	89.8399	557.126	562.371	608.695	167.627	307.299	227.553	1.53489	0.829523	0.273843	0.178006	1.10387	1.11426	1.20605	0.33213	0.608872	0.450866	0.0144541	0.0813866	0.0686742	0.0499364	0.155541	0.207015	0.0854267	0.0716185	0.0454981	0.125742	0.00495471	0.0873558	0.0721487	0.119536	0.0840479	0.102187
	348.697		504.702																					1.52043	0.748136	0.205168	0.128069	0.94833	0.907248	1.12062	0.260512	0.563374	0.325124	2.91724	0.931669	0.951843	0.417751	1.85063	2.02585	1.00003	0.979441	0.814792	1.02993
	348.697		504.702
[truncated: 4 more columns]

## Sheet: ntd.cc
				FRAP										FRAP-back										FRAP/(un-b)										x-min										x/max
time	back	unbleach	un-back	1	2	3	4	5	6	7	8	9	10	1	2	3	4	5	6	7	8	9	10	1	2	3	4	5	6	7	8	9	10	1	2	3	4	5	6	7	8	9	10	1	2	3	4	5	6
0	546.429	1157.79	627.791	2810.14	2668.22	2012.6	2483.23	1959.34	1160.21	2175.07	1907.12	3674.61	1559.97	2280.14	2138.22	1482.61	1953.23	1429.34	630.213	1645.07	1377.12	3144.61	1029.97	3.62609	3.4004	2.35778	3.10621	2.27307	1.00222	2.61615	2.19003	5.00085	1.63796	1.86703	1.80707	1.20235	1.62775	1.27352	0.662796	1.45331	1.17337	2.72667	0.938381	1	1	1	1	1	1
5.008	528.195	1153.94	623.946	1636.12	1531.91	1256.55	1459.67	1158.53	743.434	1261.2	1169.29	1960.03	969.902	1106.12	1001.91	726.551	929.678	628.529	213.437	731.207	639.293	1430.04	439.905	1.75906	1.59333	1.15543	1.47846	0.999546	0.339428	1.16283	1.01666	2.27418	0.699578	4.88498e-15	2.88658e-15	1.9984e-15	-4.66294e-15	0	0	0	-4.66294e-15	0	0	2.61645e-15	1.59738e-15	1.66208e-15	-2.86464e-15	0	0
10.015	529.962	1158.05	628.056	1655.58	1545.63	1269.53	1478.2	1173.53	751.647	1276.31	1184.6	1981.57	979.397	1125.59	1015.64	739.531	948.205	643.534	221.65	746.31	654.6	1451.58	449.4	1.79001	1.61516	1.17607	1.50792	1.02341	0.352489	1.18685	1.04101	2.30843	0.714678	0.0309535	0.02183	0.020642	0.0294634	0.0238623	0.0130611	0.0240182	0.0243426	0.0342533	0.0150998	0.016579	0.0120803	0.0171681	0.0181006	0.0187373	0.019706
15.023	530.055	1159.54	629.539	1667.26	1561.68	1280.49	1486.47	1180.02	754.477	1287.61	1188.8	2009.22	982.994	1137.26	1031.68	750.49	956.469	650.026	224.48	757.609	658.807	1479.23	452.997	1.80858	1.64067	1.1935	1.52107	1.03373	0.356989	1.20482	1.0477	2.3524	0.720398	0.0495233	0.0473446	0.03807	0.0426055	0.0341865	0.0175616	0.0419869	0.031033	0.0782249	0.0208201	0.0265252	0.0261996	0.0316631	0.0261744	0.0268441	0.0264962
20.031	530.429	1159.66	629.661	1677.55	1569.3	1284.83	1493.47	1187.59	759.185	1295.39	1198.78	2018.31	986.616	1147.56	1039.3	754.833	963.469	657.594	229.188	765.389	668.782	1488.31	456.619	1.82495	1.65279	1.20041	1.5322	1.04577	0.364476	1.21719	1.06356	2.36685	0.726158	0.065889	0.0594627	0.0449767	0.0537376	0.0462219	0.0250487	0.0543594	0.0468962	0.0926759	0.0265802	0.0352909	0.0329055	0.0374074	0.0330133	0.0362945	0.0377925
25.038	530.042	1157.79	627.794	1686.63	1578.94	1292.11	1501.48	1199.7	762.742	1304.06	1203.74	2034.09	991.621	1156.63	1048.94	762.109	971.479	669.708	232.745	774.058	673.747	1504.09	461.624	1.83939	1.66812	1.21198	1.54494	1.06503	0.370133	1.23098	1.07146	2.39194	0.734118	0.0803273	0.0747947	0.0565476	0.0664758	0.0654867	0.0307054	0.0681457	0.054792	0.117764	0.0345396	0.0430242	0.0413899	0.047031	0.040839	0.0514217	0.046327
30.046	530.775	1160.12	630.123	1693.81	1586.61	1300.06	1506.13	1207.92	767.097	1312.28	1211.64	2050.47	997.217	1163.81	1056.61	770.065	976.136	677.921	237.1	782.286	681.644	1520.48	467.22	1.8508	1.68032	1.22463	1.55234	1.07809	0.377059	1.24406	1.08401	2.418	0.743017	0.0917377	0.0869874	0.0692	0.0738818	0.0785478	0.0376311	0.0812306	0.0673505	0.143826	0.0434389	0.0491357	0.0481372	0.0575541	0.0453888	0.0616776	0.0567763
35.054	529.749	1158.44	628.445	1701.23	1593.27	1303.09	1510.46	1213.16	769.663	1321	1217.34	2058.02	1000.87	1171.23	1063.27	773.097	980.463	683.165	239.666	791.002	687.343	1528.02	470.868	1.8626	1.69091	1.22945	1.55922	1.08643	0.381139	1.25793	1.09308	2.43	0.748818	0.103541	0.0975852	0.0740218	0.080763	0.0868873	0.0417118	0.0950916	0.0764136	0.155826	0.0492402	0.0554576	0.0540018	0.0615644	0.0496162	0.068226	0.0629331
40.061	528.35	1159.22	629.22	1707.52	1599.25	1309.47	1519.78	1215.6	770.181	1324.25	1221.5	2067.89	1003.25	1177.52	1069.25	779.471	989.782	685.6	240.184	794.257	691.501	1537.89	473.249	1.87261	1.70042	1.23959	1.57404	1.09031	0.381963	1.2631	1.09969	2.4457	0.752605	0.113547	0.107092	0.0841583	0.095583	0.0907596	0.0425356	0.100268	0.083026	0.171521	0.0530267	0.0608169	0.0592626	0.069995	0.0587208	0.0712667	0.064176
45.069	529.273	1158.57	628.574	1716.18	1607.25	1312.74	1530.16	1219.47	772.853	1332.53	1226.46	2078.15	1005.97	1186.18	1077.25	782.739	1000.16	689.472	242.856	802.536	696.46	1548.16	475.974	1.88637	1.71315	1.24478	1.59055	1.09646	0.386213	1.27627	1.10758	2.46202	0.756938	0.127314	0.119819	0.0893554	0.11209	0.0969172	0.0467848	0.113434	0.0909123	0.187842	0.0573603	0.0681908	0.0663056	0.0743174	0.0688619	0.0761018	0.0705871
50.077	528.645	1158.44	628.448	1721.07	1616.17	1318.21	1535.14	1218.8	776.268	1342.49	1231.64	2094.16	1009.96	1191.07	1086.17	788.216	1005.14	688.801	246.271	812.495	701.645	1564.16	479.965	1.89415	1.72733	1.25349	1.59847	1.0954	0.391643	1.29211	1.11582	2.48747	0.763285	0.135092	0.134004	0.0980654	0.120011	0.0958501	0.0522157	0.129272	0.099158	0.213296	0.0637071	0.0723568	0.0741555	0.0815616	0.0737283	0.0752639	0.0787809
55.084	529.89	1159.47	629.469	1731.32	1621.31	1325.17	1544.6	1229.27	779.112	1347.38	1237.78	2106.02	1013.71	1201.32	1091.32	795.174	1014.6	699.271	249.115	817.38	707.779	1576.02	483.708	1.91046	1.73551	1.26456	1.61351	1.11205	0.396166	1.29987	1.12558	2.50633	0.769238	0.151397	0.142182	0.109131	0.135054	0.112501	0.0567385	0.13704	0.108913	0.232154	0.0696596	0.0810901	0.0786806	0.0907647	0.0829696	0.0883382	0.0856047
60.092	529.36	1158.09	628.096	1743.77	1630.1	1330.7	1546.21	1233.59	780.704	1356.07	1243.38	2118.93	1017.88	1213.78	1100.11	800.702	1016.21	703.591	250.707	826.069	713.387	1588.94	487.88	1.93026	1.74949	1.27335	1.61607	1.11892	0.398698	1.31369	1.13449	2.52688	0.775872	0.171201	0.15616	0.117922	0.137613	0.119371	0.0592702	0.150858	0.117831	0.252699	0.0762943	0.0916973	0.0864162	0.0980763	0.0845415	0.0937327	0.0894245
65.1	527.56	1158.7	628.706	1747.13	1634.25	1334.03	1550.08	1238.22	783.768	1362.8	1247.18	2130.64	1018.1	1217.14	1104.25	804.032	1020.09	708.219	253.771	832.807	717.188	1600.65	488.105	1.93561	1.75608	1.27865	1.62223	1.12628	0.403571	1.32441	1.14054	2.5455	0.77623	0.176546	0.162752	0.123218	0.143774	0.12673	0.0641429	0.161574	0.123876	0.271322	0.0766521	0.0945601	0.0900639	0.102481	0.0883264	0.0995119	0.0967762
70.107	529.574	1155.07	625.074	1753.84	1639.12	1338.47	1559	1245.88	787.339	1370.04	1253.84	2146.56	1023.86	1223.84	1109.12	808.47	1029	715.878	257.342	840.038	723.842	1616.56	493.867	1.94626	1.76383	1.2857	1.63642	1.13846	0.409249	1.33591	1.15112	2.5708	0.785394	0.187201	0.170503	0.130275	0.157954	0.138911	0.0698218	0.173073	0.134458	0.296625	0.0858154	0.100267	0.0943532	0.108351	0.0970382	0.109076	0.105344
75.115	529.324	1154.36	624.368	1762.61	1648.61	1344.57	1564.67	1250.82	789.327	1377.45	1257.9	2158.9	1027.9	1232.61	1118.61	814.573	1034.67	720.819	259.33	847.45	727.899	1628.91	497.908	1.96022	1.77892	1.29541	1.64544	1.14631	0.412411	1.34769	1.15757	2.59044	0.79182	0.201158	0.185587	0.139981	0.166974	0.146768	0.0729833	0.18486	0.14091	0.316262	0.0922418	0.107742	0.1027	0.116423	0.10258	0.115246	0.110114
80.123	529.403	1154.28	624.286	1767.61	1655.61	1349.51	1570.94	1253.44	791.746	1382.31	1262.9	2169.95	1030.61	1237.61	1125.62	819.511	1040.94	723.443	261.749	852.31	732.903	1639.95	500.614	1.96816	1.79006	1.30326	1.65541	1.15049	0.416258	1.35542	1.16553	2.608	0.796123	0.209101	0.196729	0.147834	0.176946	0.150941	0.0768302	0.192589	0.148867	0.333823	0.0965451	0.111997	0.108866	0.122954	0.108705	0.118523	0.115918
85.131	529.01	1158.82	628.824	1775.91	1663.16	1354.15	1579.85	1265.65	795.02	1391.46	1268.08	2185.25	1035.23	1245.92	1133.16	824.152	1049.85	735.652	265.023	861.468	738.086	1655.26	505.234	1.98138	1.80206	1.31064	1.66958	1.1699	0.421465	1.36999	1.17377	2.63234	0.80347	0.222315	0.208734	0.155214	0.191115	0.170357	0.0820369	0.207153	0.15711	0.358166	0.103892	0.119074	0.115509	0.129093	0.11741	0.133768	0.123774
90.138	528.503	1157.71	627.715	1786.16	1669.34	1361.62	1586.57	1268.74	798.723	1396.92	1276.03	2197.44	1039.31	1256.17	1139.34	831.628	1056.57	738.74	268.726	866.923	746.029	1667.44	509.31	1.99767	1.81189	1.32253	1.68026	1.17481	0.427353	1.37866	1.18641	2.65172	0.809952	0.238612	0.218559	0.167103	0.201797	0.175268	0.0879257	0.215828	0.169742	0.377539	0.110374	0.127803	0.120946	0.138981	0.123973	0.137625	0.132659
95.146	528.624	1158.4	628.4	1796.81	1677.18	1365.62	1590.64	1275.51	801.478	1406.48	1281.9	2211.54	1042.74	1266.82	1147.18	835.624	1060.65	745.516	271.481	876.483	751.899	1681.54	512.74	2.01461	1.82436	1.32889	1.68674	1.18559	0.431735	1.39387	1.19574	2.67414	0.815407	0.255547	0.23103	0.173458	0.208279	0.186044	0.092307	0.231031	0.179077	0.399965	0.115829	0.136874	0.127847	0.144266	0.127955	0.146086	0.139269
100.154	528.496	1159.44	629.443	1799.42	1684.68	1370.04	1600.11	1279.36	804.348	1412.41	1287.48	2222.82	1046.28	1269.42	1154.68	840.045	1070.11	749.365	274.351	882.414	757.481	1692.83	516.28	2.01875	1.83628	1.33592	1.7018	1.19171	0.436299	1.4033	1.20462	2.69209	0.821037	0.25969	0.242949	0.180489	0.223334	0.192165	0.0968711	0.240463	0.187954	0.417915	0.121459	0.139093	0.134443	0.150114	0.137204	0.150892	0.146155
105.161	527.182	1158.84	628.842	1808.27	1696.47	1375.72	1607.34	1286.1	808.902	1422.07	1289.97	2236.64	1050.89	1278.28	1166.48	845.722	1077.35	756.102	278.905	892.077	759.978	1706.65	520.895	2.03284	1.85504	1.34495	1.71329	1.20242	0.443541	1.41866	1.20859	2.71407	0.828376	0.273775	0.26171	0.189517	0.234834	0.202878	0.104113	0.25583	0.191925	0.439888	0.128798	0.146637	0.144825	0.157622	0.144269	0.159305	0.157082
110.169	528.143	1160.71	630.714	1817.36	1701.48	1380.58	1614.44	1293.89	810.71	1428.82	1295.32	2250.32	1054.64	1287.37	1171.48	850.586	1084.45	763.892	280.713	898.827	765.322	1720.33	524.64	2.04729	1.863	1.35268	1.72459	1.21481	0.446416	1.4294	1.21709	2.73582	0.834332	0.288231	0.269674	0.197252	0.24613	0.215267	0.106989	0.266565	0.200423	0.461643	0.134753	0.15438	0.149232	0.164056	0.151208	0.169033	0.16142
115.177	527.35	1156.76	626.762	1821.14	1703.42	1385.09	1617.87	1297.2	811.52	1432.91	1299.81	2254.31	1057.32	1291.15	1173.43	855.091	1087.87	767.206	281.523	902.914	769.817	1724.31	527.326	2.0533	1.86609	1.35985	1.73004	1.22008	0.447704	1.4359	1.22423	2.74216	0.838603	0.294239	0.272761	0.204416	0.251575	0.220537	0.108277	0.273064	0.207571	0.467984	0.139025	0.157598	0.150941	0.170014	0.154553	0.173171	0.163364
120.184	527.806	1160.99	630.989	1829.73	1711.59	1389.46	1627.55	1304.56	815.838	1440.51	1306.4	2269.19	1060.61	1299.74	1181.59	859.466	1097.56	774.56	285.841	910.511	776.407	1739.19	530.612	2.06696	1.87907	1.3668	1.74543	1.23178	0.454571	1.44798	1.23472	2.76582	0.843829	0.307905	0.285745	0.211374	0.266974	0.232232	0.115144	0.285146	0.218051	0.491642	0.144251	0.164917	0.158126	0.175801	0.164013	0.182354	0.173724
125.192	527.846	1159.76	629.767	1836.8	1717.54	1394.88	1634.97	1308.87	818.852	1448.96	1310.13	2282.34	1064	1306.81	1187.54	864.887	1104.97	778.868	288.855	918.965	780.131	1752.34	534.006	2.0782	1.88854	1.37542	1.75722	1.23863	0.459364	1.46142	1.24064	2.78673	0.849226	0.319143	0.295208	0.219995	0.278764	0.239083	0.119937	0.29859	0.223974	0.512555	0.149648	0.170936	0.163362	0.182971	0.171257	0.187734	0.180956
130.2	528.712	1159.7	629.708	1839.72	1724.21	1401.07	1639.68	1315.79	822.471	1452.97	1313.51	2291.74	1068.12	1309.72	1194.22	871.071	1109.68	785.791	292.474	922.97	783.514	1761.74	538.122	2.08284	1.89916	1.38526	1.76472	1.24964	0.46512	1.46779	1.24602	2.80168	0.855772	0.323779	0.305826	0.229829	0.286256	0.250093	0.125692	0.304959	0.229354	0.527503	0.156194	0.173419	0.169238	0.19115	0.175859	0.196379	0.189639
135.207	527.501	1158.46	628.464	1846.85	1729.03	1400.99	1641.87	1318.34	824.107	1460.04	1318.21	2300.69	1068.39	1316.86	1199.04	870.998	1111.88	788.338	294.11	930.045	788.216	1770.69	538.39	2.09419	1.90682	1.38514	1.76821	1.25369	0.467721	1.47904	1.25349	2.81592	0.856198	0.335126	0.313488	0.229713	0.289747	0.254143	0.128294	0.316211	0.236831	0.54174	0.15662	0.179497	0.173478	0.191054	0.178004	0.199559	0.193564
140.215	527.751	1160.97	630.972	1853.62	1737.04	1406.4	1652.36	1328.38	828.633	1465.49	1325.26	2314.89	1074.94	1323.62	1207.04	876.407	1122.36	798.386	298.636	935.498	795.264	1784.89	544.941	2.10494	1.91955	1.39374	1.78489	1.26967	0.474919	1.48772	1.2647	2.8385	0.866616	0.345881	0.326223	0.238315	0.306427	0.270122	0.135491	0.324883	0.24804	0.564325	0.167038	0.185257	0.180526	0.198208	0.188252	0.212107	0.204424
145.223	528.716	1159.2	629.207	1860.49	1741.91	1413.35	1657.39	1331.42	830.147	1472.78	1329.95	2326.07	1077.48	1330.49	1211.92	883.35	1127.4	801.425	300.15	942.783	799.958	1796.07	547.479	2.11587	1.9273	1.40479	1.79289	1.2745	0.477327	1.4993	1.27217	2.85628	0.870652	0.356812	0.333973	0.249356	0.314431	0.274955	0.137899	0.336468	0.255504	0.5821	0.171074	0.191113	0.184814	0.207391	0.193169	0.215902	0.208057
150.23	526.209	1160.21	630.218	1866.95	1746.18	1419.7	1663.62	1337.95	831.386	1478.26	1335.38	2334.34	1081.26	1336.95	1216.18	889.703	1133.62	807.955	301.389	948.262	805.386	1804.35	551.258	2.12615	1.93409	1.41489	1.80279	1.28489	0.479297	1.50801	1.2808	2.86944	0.876662	0.367087	0.340757	0.25946	0.324331	0.28534	0.139869	0.345181	0.264137	0.595263	0.177084	0.196616	0.188568	0.215794	0.19925	0.224056	0.211029
155.238	528.574	1160.06	630.06	1875.4	1754.27	1425.05	1665.72	1342.3	833.987	1487.09	1340.82	2351.07	1084.32	1345.4	1224.27	895.05	1135.72	812.301	303.99	957.088	810.822	1821.07	554.325	2.13958	1.94695	1.42339	1.80613	1.2918	0.483433	1.52205	1.28944	2.89604	0.88154	0.380524	0.353622	0.267963	0.327674	0.292251	0.144006	0.359217	0.272781	0.621859	0.181961	0.203813	0.195688	0.222866	0.201304	0.229483	0.21727
160.246	527.921	1161.43	631.429	1882.5	1758.45	1429.73	1670.7	1346.83	837.004	1492.16	1344.08	2359.4	1088.02	1352.5	1228.45	899.731	1140.71	816.833	307.007	962.164	814.084	1829.4	558.021	2.15087	1.95359	1.43084	1.81406	1.299	0.488231	1.53012	1.29463	2.90928	0.887417	0.391815	0.360265	0.275407	0.335595	0.299459	0.148804	0.367289	0.277969	0.635103	0.187839	0.20986	0.199364	0.229058	0.20617	0.235142	0.224509
165.253	530.065	1163.27	633.276	1887.93	1769.21	1436.26	1678.14	1352.92	838.772	1497.78	1347.74	2371.67	1089.84	1357.93	1239.22	906.264	1148.15	822.926	308.775	967.779	817.746	1841.67	559.845	2.15951	1.97072	1.44123	1.82589	1.30869	0.491043	1.53905	1.30046	2.9288	0.890318	0.40045	0.377386	0.285796	0.347431	0.309148	0.151615	0.376219	0.283793	0.654622	0.19074	0.214485	0.208838	0.237699	0.213442	0.242751	0.228751
170.261	527.389	1159.91	629.909	1891.71	1770.39	1436.8	1679.06	1358.06	841.608	1504.78	1349.26	2381.66	1093.4	1361.72	1240.39	906.807	1149.06	828.067	311.611	974.781	819.264	1851.66	563.404	2.16553	1.97258	1.44209	1.82734	1.31687	0.495553	1.55019	1.30287	2.94469	0.895978	0.406468	0.379253	0.28666	0.348879	0.317324	0.156125	0.387354	0.286207	0.670507	0.1964	0.217708	0.209871	0.238417	0.214331	0.249171	0.235556
175.269	527.596	1158.67	628.675	1898.22	1777.67	1441.41	1685.63	1360.38	843.594	1510.77	1357.94	2389.54	1095.82	1368.22	1247.67	911.41	1155.63	830.386	313.597	980.774	827.939	1859.54	565.827	2.17587	1.98417	1.44941	1.8378	1.32056	0.498711	1.55972	1.31667	2.95722	0.899831	0.416813	0.390837	0.29398	0.359336	0.321012	0.159284	0.396885	0.300002	0.683042	0.200253	0.223249	0.216282	0.244505	0.220756	0.252066	0.240321
180.276	527.819	1159.13	629.138	1904.05	1781.79	1447.04	1688.98	1363.21	845.403	1513.67	1359.85	2401.26	1099.66	1374.05	1251.79	917.04	1158.99	833.213	315.406	983.673	829.856	1871.26	569.666	2.18515	1.99071	1.45836	1.84313	1.32505	0.501588	1.56433	1.31971	2.97586	0.905936	0.426089	0.397386	0.302933	0.364665	0.325508	0.162161	0.401495	0.303051	0.70168	0.206358	0.228218	0.219906	0.251952	0.22403	0.255597	0.244661
185.284	528.569	1159.25	629.253	1907.72	1787.66	1448.88	1694.12	1367.55	848.089	1519.16	1363.74	2412.15	1102.17	1377.73	1257.67	918.879	1164.12	837.554	318.092	989.165	833.744	1882.15	572.172	2.19099	2.00006	1.46129	1.8513	1.33196	0.50586	1.57306	1.3259	2.99317	0.909921	0.431927	0.406727	0.305858	0.372835	0.332411	0.166432	0.410229	0.309234	0.718995	0.210343	0.231345	0.225075	0.254384	0.229049	0.261017	0.251106
190.292	528.506	1163.23	633.234	1918.97	1795.35	1454.18	1703.73	1372.78	851.858	1524.65	1370.59	2422.07	1107.8	1388.98	1265.35	924.185	1173.73	842.781	321.861	994.652	840.594	1892.07	577.8	2.20888	2.01228	1.46973	1.86658	1.34027	0.511854	1.58179	1.33679	3.00894	0.918872	0.449819	0.418955	0.314296	0.388121	0.340723	0.172426	0.418955	0.320128	0.734765	0.219293	0.240928	0.231842	0.261402	0.238439	0.267544	0.260149
195.299	528.293	1160.07	630.071	1922.47	1801.25	1457.28	1708.18	1378.64	853.497	1527.92	1373.95	2427.78	1109.63	1392.48	1271.25	927.279	1178.18	848.648	323.5	997.922	843.957	1897.78	579.633	2.21445	2.02166	1.47465	1.87365	1.3496	0.51446	1.58699	1.34214	3.01803	0.921787	0.455385	0.428334	0.319216	0.395189	0.350054	0.175032	0.424155	0.325476	0.743848	0.222208	0.243909	0.237032	0.265494	0.242782	0.274871	0.264082
200.307	529.733	1160.9	630.901	1927.08	1805.39	1460.35	1714.24	1381.66	854.605	1533.56	1375.9	2435.59	1111.58	1397.09	1275.39	930.349	1184.25	851.662	324.608	1003.56	845.902	1905.6	581.586	2.22177	2.02825	1.47953	1.8833	1.35439	0.516222	1.59596	1.34523	3.03046	0.924893	0.462715	0.434917	0.324099	0.404836	0.354847	0.176794	0.433126	0.328569	0.756281	0.225314	0.247835	0.240674	0.269555	0.248708	0.278634	0.26674
205.315	528.376	1162	632.007	1936.12	1812.75	1464.33	1723.7	1388.38	859.233	1540.48	1382.32	2447.15	1113.81	1406.13	1282.76	934.333	1193.7	858.378	329.236	1010.48	852.321	1917.15	583.817	2.23615	2.03996	1.48586	1.89833	1.36507	0.523582	1.60696	1.35544	3.04883	0.92844	0.477094	0.446629	0.330434	0.419874	0.365527	0.184154	0.444126	0.338777	0.774652	0.228862	0.255537	0.247156	0.274824	0.257947	0.287021	0.277845
210.322	528.068	1161.62	631.625	1937.68	1816.88	1466.91	1723.29	1389.44	858.376	1547.2	1384.64	2454.27	1117.33	1407.69	1286.88	936.916	1193.3	859.447	328.379	1017.21	854.643	1924.27	587.33	2.23863	2.04652	1.48997	1.89769	1.36677	0.522219	1.61765	1.35913	3.06016	0.934027	0.479572	0.453186	0.334542	0.41923	0.367227	0.182791	0.454821	0.34247	0.785982	0.234449	0.256864	0.250784	0.278241	0.257551	0.288356	0.275788
215.33	528.519	1164.55	634.553	1943.98	1824.66	1472.93	1730.04	1397.35	861.616	1551.84	1390.07	2462.11	1120.83	1413.98	1294.66	942.934	1200.05	867.356	331.619	1021.84	860.073	1932.12	590.836	2.24864	2.05889	1.49954	1.90842	1.37935	0.527372	1.62502	1.36777	3.07263	0.939603	0.489584	0.465563	0.344112	0.429963	0.379805	0.187944	0.462188	0.351105	0.798456	0.240025	0.262227	0.257634	0.2862	0.264145	0.298232	0.283562
220.338	527.991	1162.51	632.508	1948.48	1828.47	1475.6	1734.38	1397.86	862.814	1556.96	1393.73	2470.51	1121.37	1418.49	1298.48	945.6	1204.39	867.865	332.817	1026.96	863.737	1940.51	591.369	2.25581	2.06496	1.50378	1.91533	1.38016	0.529277	1.63317	1.3736	3.08598	0.94045	0.496749	0.47163	0.348352	0.436868	0.380614	0.189849	0.47034	0.356932	0.8118	0.240872	0.266064	0.260991	0.289727	0.268387	0.298868	0.286437
225.346	528.717	1161.47	631.478	1956.49	1831.85	1479.76	1741.72	1402.32	866.768	1560.53	1397.81	2481.97	1124.38	1426.49	1301.85	949.763	1211.72	872.321	336.771	1030.54	867.814	1951.98	594.381	2.26854	2.07033	1.5104	1.92699	1.38725	0.535565	1.63885	1.38008	3.10421	0.94524	0.509476	0.476997	0.354973	0.448533	0.387701	0.196137	0.476019	0.363415	0.830034	0.245662	0.272881	0.263961	0.295233	0.275553	0.304432	0.295924
230.353	526.992	1162.22	632.228	1960.83	1838.06	1485.2	1743.9	1408.41	866.818	1564.1	1399.63	2486.39	1126.32	1430.84	1308.06	955.207	1213.91	878.416	336.821	1034.11	869.637	1956.4	596.32	2.27545	2.0802	1.51906	1.93047	1.39694	0.535644	1.64453	1.38298	3.11125	0.948324	0.51639	0.486868	0.36363	0.452006	0.397394	0.196217	0.481697	0.366314	0.837067	0.248746	0.276584	0.269424	0.302433	0.277687	0.312043	0.296044
235.361	528.108	1160.59	630.591	1964.39	1842.68	1488.48	1751.36	1408.92	869.467	1569.35	1400.57	2497.54	1129.61	1434.39	1312.69	958.483	1221.36	878.92	339.47	1039.35	870.576	1967.54	599.612	2.2811	2.08756	1.52427	1.94232	1.39774	0.539857	1.65287	1.38447	3.12897	0.953559	0.522039	0.49423	0.36884	0.463858	0.398195	0.200429	0.490035	0.367808	0.854791	0.253981	0.27961	0.273497	0.306766	0.284968	0.312673	0.3024
240.369	528.964	1162.16	632.165	1971.95	1849.71	1494.31	1757.54	1415.16	873.369	1574.22	1406.65	2504.8	1133.62	1441.96	1319.71	964.309	1227.54	885.159	343.372	1044.22	876.658	1974.81	603.624	2.29313	2.09873	1.53353	1.95215	1.40766	0.546062	1.66062	1.39414	3.14052	0.959939	0.534075	0.505402	0.378105	0.473689	0.408117	0.206635	0.497784	0.37748	0.866341	0.260361	0.286056	0.279679	0.314472	0.291008	0.320463	0.311762
245.376	529.33	1160.81	630.816	1973.39	1852.04	1493.57	1760.18	1414.75	872.941	1575.04	1408.3	2509.61	1134.3	1443.4	1322.04	963.572	1230.18	884.749	342.944	1045.04	878.299	1979.61	604.298	2.29542	2.10243	1.53236	1.95635	1.40701	0.545382	1.66192	1.39675	3.14816	0.961011	0.536361	0.509101	0.376933	0.477889	0.407465	0.205954	0.49909	0.38009	0.873984	0.261433	0.287281	0.281726	0.313497	0.293588	0.319951	0.310735
250.384	529.018	1164.48	634.481	1981.81	1858.68	1502.53	1769.89	1424.22	876.009	1578.3	1412.86	2520.36	1137.99	1451.81	1328.68	972.531	1239.89	894.22	346.012	1048.31	882.859	1990.37	607.997	2.3088	2.11299	1.54661	1.97179	1.42207	0.550261	1.66712	1.404	3.16527	0.966894	0.549744	0.51966	0.39118	0.493331	0.422527	0.210833	0.504282	0.387341	0.891087	0.267316	0.294449	0.28757	0.325347	0.303075	0.331778	0.318097
255.392	528.277	1163.86	633.865	1983.7	1860.45	1502.19	1773.18	1425.64	876.912	1585.91	1413.56	2526.98	1139.8	1453.7	1330.46	972.193	1243.19	895.642	346.915	1055.91	883.566	1996.99	609.802	2.31181	2.11582	1.54607	1.97703	1.42433	0.551697	1.67921	1.40513	3.17579	0.969764	0.552748	0.522488	0.390643	0.498568	0.424788	0.212269	0.516373	0.388466	0.901614	0.270186	0.296058	0.289135	0.3249	0.306292	0.333554	0.320263
260.399	529.694	1165.15	635.151	1994.96	1871.38	1507.95	1782.19	1430.16	881.288	1593.36	1421.6	2534.38	1144.62	1464.96	1341.38	977.955	1252.19	900.162	351.291	1063.36	891.606	2004.38	614.621	2.32972	2.13319	1.55524	1.99135	1.43152	0.558656	1.69106	1.41792	3.18755	0.977428	0.570656	0.539863	0.399806	0.51289	0.431976	0.219228	0.528222	0.401252	0.913372	0.27785	0.305649	0.29875	0.332521	0.315091	0.339198	0.330763
265.407	528.552	1161.19	631.194	1996.3	1872.53	1511.69	1781.88	1432.88	881.931	1594.48	1422.36	2537.77	1145.85	1466.3	1342.54	981.696	1251.89	902.878	351.934	1064.49	892.364	2007.77	615.848	2.33185	2.13503	1.56118	1.99087	1.43584	0.559679	1.69285	1.41912	3.19295	0.979379	0.572792	0.541697	0.405755	0.512405	0.436295	0.220251	0.530013	0.402457	0.91877	0.279801	0.306793	0.299765	0.337469	0.314793	0.34259	0.332306
270.415	529.242	1163.23	633.231	2003.87	1876.79	1511.69	1783.13	1433.8	883.529	1595.87	1423.25	2542.49	1146.01	1473.87	1346.79	981.697	1253.13	903.803	353.532	1065.87	893.251	2012.49	616.014	2.34389	2.14179	1.56119	1.99284	1.43731	0.56222	1.69504	1.42053	3.20045	0.979643	0.584829	0.548462	0.405757	0.514382	0.437766	0.222792	0.532209	0.403868	0.926274	0.280065	0.31324	0.303508	0.337471	0.316007	0.343745	0.33614
275.422	530.209	1163.34	633.342	2003.23	1880.69	1516.26	1789.26	1436.93	885.23	1598.94	1427.89	2552.81	1150.46	1473.24	1350.69	986.259	1259.26	906.934	355.233	1068.94	897.893	2022.82	620.468	2.34288	2.148	1.56844	2.0026	1.44229	0.564925	1.69993	1.42791	3.21687	0.986726	0.583817	0.554667	0.413012	0.524135	0.442746	0.225497	0.537093	0.41125	0.942691	0.287148	0.312699	0.306942	0.343505	0.321999	0.347655	0.340221
280.43	529.009	1162.56	632.562	2011.06	1886.64	1520.12	1796.74	1442.49	887.409	1603.4	1431.88	2560.28	1153.29	1481.06	1356.65	990.119	1266.74	912.492	357.412	1073.4	901.883	2030.28	623.295	2.35532	2.15747	1.57458	2.01449	1.45113	0.56839	1.70702	1.43426	3.22875	0.991222	0.596257	0.564139	0.41915	0.536026	0.451584	0.228962	0.544186	0.417595	0.954567	0.291644	0.319361	0.312184	0.34861	0.329304	0.354595	0.345449
285.438	528.389	1166.94	636.943	2013.24	1892.54	1524.17	1803.56	1444.36	889.514	1607.83	1434.79	2568.71	1155.67	1483.25	1362.55	994.176	1273.56	914.365	359.517	1077.83	904.793	2038.71	625.676	2.35879	2.16685	1.58103	2.02533	1.45411	0.571738	1.71407	1.43889	3.24215	0.995009	0.599735	0.573517	0.425602	0.54687	0.454563	0.23231	0.551235	0.422223	0.967972	0.29543	0.321224	0.317373	0.353976	0.335966	0.356934	0.3505
290.445	529.717	1163.59	633.598	2018.32	1895.85	1524.54	1803.36	1447.7	890.779	1611.25	1435.4	2574.06	1157.55	1488.33	1365.86	994.545	1273.36	917.701	360.782	1081.25	905.407	2044.07	627.552	2.36688	2.17211	1.58162	2.02501	1.45941	0.573749	1.7195	1.43986	3.25067	0.997992	0.607816	0.578781	0.426189	0.546554	0.459868	0.234322	0.556671	0.423199	0.976488	0.298414	0.325553	0.320286	0.354464	0.335772	0.3611	0.353535
295.453	529.628	1164.07	634.071	2021.09	1897.98	1528.02	1803.09	1448.44	891.041	1611.26	1436.71	2577.6	1159.02	1491.09	1367.99	998.02	1273.1	918.448	361.044	1081.26	906.718	2047.61	629.022	2.37127	2.1755	1.58714	2.0246	1.4606	0.574166	1.71952	1.44195	3.25629	1.00033	0.61221	0.582168	0.431715	0.546137	0.461056	0.234738	0.556688	0.425284	0.982116	0.300751	0.327906	0.322161	0.35906	0.335516	0.362033	0.354164
300.461	530.013	1165.11	635.114	2029.92	1902.65	1533.08	1807.38	1451.78	892.556	1614.25	1441.14	2584.12	1162.65	1499.92	1372.66	1003.08	1277.38	921.785	362.559	1084.25	911.141	2054.13	632.649	2.38532	2.18293	1.59519	2.03141	1.46591	0.576575	1.72428	1.44898	3.26666	1.0061	0.626257	0.589598	0.439759	0.552945	0.466363	0.237148	0.561442	0.432318	0.992486	0.306519	0.33543	0.326272	0.36575	0.339698	0.3662	0.357799
305.468	530.198	1164.96	634.966	2033.57	1907.65	1537.01	1812.63	1454.95	896.846	1618.99	1444.22	2589.91	1165.29	1503.57	1377.66	1007.01	1282.63	924.951	366.849	1089	914.225	2059.92	635.29	2.39111	2.19088	1.60144	2.03976	1.47094	0.583398	1.73182	1.45389	3.27587	1.0103	0.632054	0.597548	0.44601	0.561296	0.471398	0.24397	0.568989	0.437222	1.00169	0.310719	0.338535	0.330672	0.37095	0.344828	0.370153	0.368092
310.476	531.005	1163.98	633.981	2037.33	1913.4	1539.14	1815.67	1456.93	895.816	1620.79	1447.27	2594.79	1165.87	1507.34	1383.41	1009.14	1285.67	926.935	365.819	1090.79	917.276	2064.79	635.873	2.39711	2.20002	1.60483	2.0446	1.4741	0.58176	1.73468	1.45874	3.28362	1.01122	0.638046	0.606692	0.449404	0.566136	0.474553	0.242332	0.571842	0.442074	1.00944	0.311647	0.341744	0.335732	0.373772	0.347802	0.372631	0.365621
315.484	528.838	1161.85	631.855	2039.11	1914.83	1540.16	1819.02	1457.82	897.393	1620.78	1447.92	2601.41	1167.62	1509.11	1384.83	1010.16	1289.02	927.821	367.396	1090.78	917.92	2071.41	637.626	2.39992	2.20228	1.60645	2.04992	1.47551	0.584268	1.73466	1.45976	3.29416	1.01401	0.640864	0.608953	0.451021	0.571462	0.475962	0.24484	0.571826	0.443099	1.01998	0.314434	0.343254	0.336983	0.375117	0.351074	0.373737	0.369405
320.491	529.555	1164.71	634.718	2049.32	1921.57	1546.27	1825.17	1466.4	902.052	1628.48	1451.63	2615.47	1172.95	1519.33	1391.58	1016.27	1295.17	936.402	372.055	1098.48	921.633	2085.48	642.956	2.41617	2.21302	1.61617	2.0597	1.48915	0.591677	1.74691	1.46567	3.31652	1.02249	0.657112	0.619686	0.460738	0.581239	0.489608	0.252249	0.584077	0.449003	1.04234	0.322911	0.351956	0.342923	0.383199	0.357081	0.384452	0.380583
325.499	530.096	1163.81	633.811	2053.13	1927.02	1551.18	1830.73	1469.86	901.407	1631.75	1454.25	2617.84	1174.52	1523.13	1397.02	1021.18	1300.73	939.86	371.41	1101.75	924.253	2087.84	644.519	2.42223	2.22168	1.62398	2.06855	1.49465	0.590651	1.75211	1.46983	3.32028	1.02497	0.66317	0.628347	0.468551	0.590088	0.495108	0.251223	0.589277	0.45317	1.0461	0.325396	0.355201	0.347715	0.389697	0.362517	0.388771	0.379036
330.507	530.671	1164.69	634.691	2057.05	1931.25	1552.82	1833.7	1468.61	903.316	1632.24	1457.78	2622.97	1176.32	1527.05	1401.25	1022.82	1303.7	938.61	373.319	1102.24	927.779	2092.98	646.318	2.42846	2.2284	1.62659	2.07326	1.49267	0.593687	1.75289	1.47544	3.32845	1.02784	0.669397	0.635076	0.471158	0.594803	0.49312	0.254259	0.590058	0.458777	1.05427	0.328257	0.358536	0.351439	0.391865	0.365413	0.38721	0.383616
335.514	529.608	1162.18	632.185	2059.7	1934.4	1552.68	1832.64	1470.81	905.305	1632.82	1458.75	2624.5	1179.3	1529.7	1404.41	1022.68	1302.64	940.808	375.308	1102.82	928.753	2094.51	649.305	2.43268	2.23342	1.62637	2.07158	1.49616	0.59685	1.75381	1.47699	3.33088	1.03259	0.673616	0.640088	0.470938	0.593117	0.496615	0.257422	0.590977	0.460326	1.0567	0.333007	0.360796	0.354213	0.391682	0.364378	0.389954	0.388388
340.522	531.059	1166.88	636.879	2066.71	1941.28	1560.71	1840.02	1474.85	908.672	1640.73	1464.49	2638.59	1182.25	1536.71	1411.28	1030.72	1310.03	944.851	378.675	1110.73	934.492	2108.59	652.249	2.44382	2.24435	1.63914	2.08333	1.50259	0.602205	1.76639	1.48612	3.35328	1.03727	0.684763	0.651018	0.483712	0.604866	0.503045	0.262777	0.603556	0.469453	1.0791	0.337689	0.366766	0.360261	0.402306	0.371596	0.395003	0.396467
345.53	532.259	1167.45	637.454	2070.8	1947.26	1562.95	1845.52	1476.93	909.52	1646.74	1468.32	2640.38	1183.81	1540.8	1417.26	1032.95	1315.52	946.938	379.523	1116.74	938.318	2110.38	653.817	2.45033	2.25386	1.6427	2.09206	1.50591	0.603553	1.77594	1.4922	3.35613	1.03976	0.691267	0.660533	0.487266	0.613599	0.506364	0.264125	0.61311	0.475537	1.08195	0.340183	0.37025	0.365526	0.405262	0.37696	0.397609	0.398502
350.538	531.343	1167.64	637.647	2074.68	1944.92	1562.79	1845.32	1479.03	910.165	1647.12	1468.76	2641.15	1183.34	1544.68	1414.93	1032.79	1315.33	949.032	380.168	1117.12	938.766	2111.16	653.344	2.4565	2.25015	1.64244	2.09176	1.50924	0.604579	1.77655	1.49291	3.35736	1.03901	0.697439	0.656817	0.487015	0.613295	0.509694	0.265151	0.613713	0.47625	1.08318	0.339431	0.373556	0.36347	0.405053	0.376774	0.400224	0.400049
355.545	530.853	1163.88	633.88	2073.24	1947.2	1563.66	1849.19	1479.3	908.936	1644.76	1468.68	2644.32	1183.9	1543.24	1417.2	1033.66	1319.2	949.299	378.939	1114.77	938.688	2114.32	653.908	2.4542	2.25377	1.64383	2.09791	1.50966	0.602624	1.77281	1.49279	3.36239	1.03991	0.695141	0.660438	0.488397	0.619449	0.510118	0.263197	0.609973	0.476126	1.08821	0.340328	0.372325	0.365473	0.406202	0.380555	0.400557	0.397101
360.553	529.991	1164.78	634.785	2080.8	1953.18	1566.5	1851.86	1485.19	911.065	1647.8	1469.64	2652.65	1187.3	1550.81	1423.18	1036.51	1321.87	955.196	381.068	1117.8	939.639	2122.65	657.299	2.46624	2.26328	1.64835	2.10216	1.51904	0.60601	1.77763	1.4943	3.37564	1.0453	0.707176	0.669951	0.492919	0.623695	0.519496	0.266582	0.614793	0.477638	1.10146	0.34572	0.378771	0.370738	0.409964	0.383163	0.407921	0.402209
365.561	529.765	1164.38	634.381	2082.38	1960.95	1568.74	1855.94	1486.59	913.491	1650.58	1471.05	2658.15	1188.62	1552.38	1430.96	1038.74	1325.95	956.594	383.494	1120.58	941.057	2128.16	658.619	2.46874	2.27564	1.65191	2.10865	1.52127	0.609868	1.78205	1.49656	3.38439	1.0474	0.709678	0.682314	0.496477	0.630185	0.52172	0.27044	0.619214	0.479893	1.11022	0.347819	0.380111	0.377579	0.412923	0.38715	0.409667	0.40803
370.568	530.938	1165.58	635.585	2088.11	1961.67	1573.58	1862.33	1490.91	913.851	1652.24	1477.05	2662.39	1193.26	1558.12	1431.67	1043.58	1332.34	960.912	383.854	1122.24	947.055	2132.39	663.263	2.47786	2.27677	1.6596	2.11881	1.52813	0.610441	1.78469	1.5061	3.39113	1.05478	0.718803	0.683444	0.504172	0.640346	0.528586	0.271013	0.621857	0.489432	1.11695	0.355205	0.384998	0.378205	0.419323	0.393392	0.415059	0.408894
375.576	530.385	1166.43	636.431	2089.91	1964.94	1572.72	1862.02	1490.94	915.778	1655.09	1476.86	2668.72	1193.78	1559.92	1434.94	1042.72	1332.03	960.948	385.781	1125.09	946.865	2138.72	663.786	2.48073	2.28198	1.65823	2.11831	1.52819	0.613505	1.78922	1.50579	3.40119	1.05561	0.721667	0.688653	0.502801	0.639853	0.528644	0.274077	0.626388	0.48913	1.12701	0.356036	0.386533	0.381087	0.418183	0.393089	0.415104	0.413517
380.584	531.12	1166.84	636.838	2093.24	1969.17	1577.98	1864.88	1497.57	917.583	1658.4	1482.4	2671.45	1195.38	1563.24	1439.17	1047.98	1334.89	967.577	387.586	1128.4	952.4	2141.45	665.387	2.48601	2.2887	1.6666	2.12286	1.53873	0.616376	1.79449	1.5146	3.40554	1.05816	0.726947	0.695375	0.511168	0.6444	0.539186	0.276948	0.631658	0.497932	1.13136	0.358582	0.38936	0.384807	0.425142	0.395883	0.423382	0.417848
385.591	531.043	1166.89	636.895	2094.92	1968.35	1577.42	1863.77	1496.06	917.386	1656.68	1480.36	2673.11	1195.08	1564.92	1438.36	1047.43	1333.77	966.062	387.389	1126.68	950.367	2143.12	665.085	2.48868	2.28741	1.66572	2.12109	1.53632	0.616062	1.79176	1.51136	3.40819	1.05768	0.729623	0.694079	0.510288	0.642626	0.536776	0.276635	0.628923	0.494699	1.13401	0.358102	0.390794	0.38409	0.42441	0.394793	0.42149	0.417375
390.599	529.501	1165.81	635.815	2099.13	1974.75	1581.24	1870.13	1499.46	919.327	1661.36	1485.43	2679.07	1198.86	1569.14	1444.75	1051.24	1340.13	969.467	389.33	1131.36	955.435	2149.07	668.859	2.49539	2.29757	1.67178	2.1312	1.54174	0.619149	1.7992	1.51942	3.41766	1.06368	0.736326	0.704245	0.516351	0.652741	0.542191	0.279721	0.636367	0.502758	1.14348	0.364104	0.394384	0.389716	0.429452	0.401007	0.425742	0.422032
395.607	530.491	1164.71	634.711	2103.61	1975.93	1581.37	1872	1496.73	920.903	1662.39	1485.15	2678.98	1197.75	1573.61	1445.93	1051.38	1342	966.736	390.906	1132.39	955.153	2148.98	667.75	2.5025	2.29946	1.67199	2.13417	1.53739	0.621655	1.80084	1.51897	3.41751	1.06192	0.743443	0.70613	0.516565	0.655713	0.537848	0.282228	0.638002	0.50231	1.14333	0.36234	0.398196	0.390759	0.429631	0.402833	0.422332	0.425814
400.614	531.29	1166.24	636.246	2109.58	1979.14	1584.62	1873.81	1504.25	923.011	1664.1	1488.45	2688.09	1201.92	1579.58	1449.15	1054.62	1343.82	974.25	393.014	1134.11	958.45	2158.1	671.927	2.512	2.30457	1.67715	2.13706	1.54934	0.625008	1.80356	1.52422	3.43201	1.06856	0.752937	0.711236	0.521724	0.658602	0.549798	0.28558	0.640726	0.507553	1.15783	0.368983	0.403281	0.393585	0.433921	0.404608	0.431715	0.430872
405.622	531.614	1163.81	633.81	2114.22	1985.76	1590.1	1880.33	1506.82	923.736	1666.81	1490.31	2696.68	1204.15	1584.23	1455.76	1060.1	1350.34	976.821	393.739	1136.82	960.317	2166.68	674.156	2.51938	2.31508	1.68587	2.14743	1.55343	0.626161	1.80787	1.52719	3.44565	1.07211	0.760322	0.721753	0.530439	0.668971	0.553886	0.286733	0.645039	0.510522	1.17148	0.372528	0.407237	0.399404	0.44117	0.410978	0.434925	0.432611
410.63	529.756	1160.74	630.742	2116.32	1988.77	1592.89	1884.92	1508.92	926.446	1670.18	1494.09	2703.29	1206.72	1586.32	1458.77	1062.89	1354.93	978.919	396.449	1140.18	964.097	2173.3	676.724	2.52272	2.31988	1.69031	2.15473	1.55677	0.63047	1.81323	1.5332	3.45618	1.07619	0.763656	0.726548	0.534882	0.676272	0.557223	0.291043	0.650393	0.516534	1.182	0.376612	0.409022	0.402058	0.444865	0.415463	0.437545	0.439114
415.637	531.958	1160.07	630.072	2116.84	1992.69	1593.68	1886.36	1507.46	926.335	1673.72	1495.95	2704.85	1209	1586.84	1462.7	1063.69	1356.36	977.463	396.338	1143.72	965.952	2174.86	679.005	2.52354	2.32612	1.69157	2.15701	1.55445	0.630294	1.81886	1.53615	3.45866	1.07982	0.764481	0.732788	0.536142	0.678546	0.554907	0.290866	0.656023	0.519484	1.18448	0.380239	0.409464	0.405511	0.445913	0.41686	0.435727	0.438847
420.645	529.439	1163.1	633.101	2124.16	1993.85	1595.85	1890.11	1509.64	928.163	1677.9	1496.25	2713.2	1209.39	1594.16	1463.86	1065.85	1360.12	979.647	398.166	1147.9	966.249	2183.2	679.397	2.53518	2.32796	1.69502	2.16299	1.55793	0.633201	1.8255	1.53662	3.47193	1.08044	0.77612	0.73463	0.539586	0.684524	0.558381	0.293773	0.66267	0.519956	1.19775	0.380862	0.415698	0.40653	0.448777	0.420533	0.438454	0.443233
425.653	531.443	1163.97	633.972	2126.84	1999.92	1597.26	1892.67	1513.81	928.078	1678.7	1499.72	2712.75	1210.27	1596.84	1469.92	1067.26	1362.68	983.815	398.081	1148.7	969.726	2182.75	680.275	2.53945	2.33761	1.69725	2.16705	1.56455	0.633066	1.82677	1.54215	3.47122	1.08184	0.78039	0.744279	0.541826	0.688594	0.565009	0.293638	0.663936	0.525485	1.19704	0.382259	0.417985	0.41187	0.45064	0.423033	0.443659	0.443029
430.66	531.018	1166.2	636.207	2134.64	2009.26	1602.31	1898	1517.82	931.18	1684.96	1503.56	2722.47	1214.82	1604.64	1479.26	1072.31	1368	987.826	401.183	1154.97	973.561	2192.47	684.827	2.55185	2.35246	1.70529	2.17553	1.57093	0.637999	1.83673	1.54825	3.48668	1.08908	0.792785	0.759126	0.549863	0.697067	0.571388	0.298571	0.673901	0.531584	1.2125	0.389498	0.424624	0.420086	0.457324	0.428238	0.448668	0.450472
435.668	532.079	1166.87	636.872	2134.01	2007.66	1600.85	1896.37	1517.78	931.721	1686.31	1500.53	2718.26	1214.67	1604.01	1477.67	1070.86	1366.37	987.779	401.724	1156.32	970.537	2188.26	684.676	2.55084	2.34993	1.70297	2.17293	1.57086	0.638859	1.83888	1.54344	3.47998	1.08884	0.791785	0.756596	0.547544	0.694465	0.571313	0.299432	0.676048	0.526775	1.2058	0.389258	0.424088	0.418686	0.455396	0.42664	0.448609	0.45177
440.676	529.42	1166.49	636.489	2134.61	2007.57	1602.48	1898.07	1515.98	929.364	1683.56	1502.3	2720.54	1214.84	1604.61	1477.57	1072.48	1368.07	985.984	399.367	1153.57	972.305	2190.54	684.846	2.55181	2.34977	1.70556	2.17563	1.568	0.635111	1.83451	1.54625	3.4836	1.08911	0.792745	0.756445	0.550129	0.697169	0.568458	0.295683	0.671673	0.529587	1.20942	0.389528	0.424603	0.418602	0.457545	0.428301	0.446367	0.446115
445.683	529.749	1166.82	636.824	2139.08	2011.06	1604.75	1903.41	1516.48	929.633	1682.8	1503.55	2723.45	1215.39	1609.08	1481.06	1074.76	1373.42	986.486	399.636	1152.8	973.551	2193.45	685.397	2.55891	2.35532	1.70918	2.18413	1.5688	0.635539	1.83329	1.54823	3.48823	1.08998	0.799854	0.761991	0.553748	0.705672	0.569257	0.296111	0.670456	0.531568	1.21405	0.390404	0.42841	0.421671	0.460556	0.433525	0.446994	0.44676
450.691	530.561	1164.37	634.37	2143.91	2014.15	1606.43	1903.23	1521.75	931.446	1687.88	1506.5	2726.7	1218.78	1613.91	1484.16	1076.43	1373.23	991.752	401.449	1157.88	976.505	2196.7	688.782	2.56659	2.36024	1.71184	2.18384	1.57718	0.638422	1.84137	1.55293	3.4934	1.09537	0.807529	0.766914	0.55641	0.705378	0.577631	0.298994	0.678537	0.536266	1.21922	0.395787	0.432521	0.424396	0.46277	0.433344	0.45357	0.45111
455.699	531.52	1167.97	637.976	2148.59	2016.63	1610.73	1910.87	1525.59	934.04	1689.78	1508.99	2739.05	1221.09	1618.6	1486.63	1080.74	1380.87	995.59	404.043	1159.78	978.993	2209.05	691.088	2.57404	2.36418	1.71869	2.19599	1.58328	0.642547	1.8444	1.55689	3.51304	1.09903	0.814982	0.770853	0.563258	0.717526	0.583735	0.303119	0.681561	0.540223	1.23887	0.399455	0.436513	0.426575	0.468465	0.440807	0.458363	0.457334
460.706	529.667	1165.93	635.935	2151.27	2018.95	1611.77	1911.08	1524.39	935.05	1692.45	1511.04	2740.55	1221.74	1621.27	1488.96	1081.77	1381.08	994.395	405.053	1162.45	981.041	2210.56	691.747	2.5783	2.36788	1.72033	2.19633	1.58138	0.644153	1.84864	1.56014	3.51543	1.10008	0.819238	0.774551	0.564904	0.717866	0.581834	0.304726	0.685809	0.54348	1.24126	0.400503	0.438793	0.428621	0.469834	0.441016	0.45687	0.459758
465.714	529.154	1164.83	634.83	2151.56	2021.99	1612.99	1910.86	1525.75	935.038	1692.93	1510	2741.64	1222.14	1621.57	1491.99	1083	1380.86	995.756	405.041	1162.93	980	2211.64	692.143	2.57877	2.37271	1.72228	2.19597	1.58354	0.644134	1.8494	1.55849	3.51716	1.10071	0.819707	0.779377	0.56685	0.717513	0.583999	0.304707	0.686571	0.541824	1.24298	0.401132	0.439044	0.431292	0.471453	0.4408	0.45857	0.459729
470.722	530.078	1162.08	632.086	2154.31	2022.84	1612.32	1911.55	1528.42	936.8	1695.01	1511.67	2743.8	1221.66	1624.31	1492.84	1082.32	1381.55	998.426	406.803	1165.01	981.67	2213.8	691.662	2.58314	2.37405	1.7212	2.19707	1.58779	0.646936	1.8527	1.56114	3.52059	1.09995	0.824076	0.780724	0.565774	0.718606	0.588245	0.307509	0.689871	0.54448	1.24641	0.400367	0.441384	0.432038	0.470558	0.441471	0.461904	0.463957
475.729	528.708	1161.16	631.161	2156.15	2024.8	1616.1	1914.82	1527.98	937.577	1696.22	1512.21	2745.29	1225.18	1626.15	1494.81	1086.1	1384.83	997.981	407.58	1166.22	982.211	2215.29	695.181	2.58606	2.37718	1.72722	2.20228	1.58708	0.648172	1.85463	1.562	3.52297	1.10554	0.826997	0.783849	0.571791	0.723819	0.587537	0.308744	0.691798	0.54534	1.24879	0.405964	0.442948	0.433767	0.475563	0.444673	0.461348	0.465821
480.737	528.541	1160.57	630.572	2160.14	2027.11	1616.25	1916.91	1528.12	938.835	1698.02	1515.54	2750.27	1225.22	1630.14	1497.11	1086.25	1386.91	998.123	408.838	1168.03	985.538	2220.27	695.221	2.5924	2.38085	1.72746	2.20559	1.58731	0.650173	1.8575	1.56729	3.53088	1.10561	0.833342	0.78752	0.57203	0.727131	0.587763	0.310745	0.694669	0.550631	1.2567	0.406027	0.446347	0.435798	0.475761	0.446708	0.461526	0.468839
485.745	530.145	1161.22	631.227	2162.28	2028.48	1618.69	1921.57	1530.26	940.02	1702.86	1516.68	2755.64	1227.02	1632.28	1498.49	1088.69	1391.58	1000.26	410.023	1172.86	986.683	2225.64	697.025	2.59581	2.38303	1.73133	2.21301	1.59071	0.652057	1.86519	1.56912	3.53942	1.10847	0.836745	0.789703	0.575906	0.734553	0.59116	0.312629	0.702355	0.552452	1.26525	0.408896	0.44817	0.437006	0.478984	0.451268	0.464193	0.471683
490.753	531.195	1162.46	632.464	2167.77	2033.13	1621.43	1925.99	1535.11	942.765	1703.07	1519.83	2758.74	1230.02	1637.77	1503.13	1091.43	1395.99	1005.11	412.768	1173.07	989.832	2228.74	700.024	2.60453	2.39042	1.73569	2.22004	1.59842	0.656422	1.86553	1.57412	3.54435	1.11324	0.845475	0.797087	0.580263	0.741578	0.598879	0.316995	0.702696	0.55746	1.27017	0.413665	0.452845	0.441092	0.482608	0.455583	0.470254	0.478269
495.76	530.661	1159.01	629.013	2171.44	2038.35	1624.22	1926.44	1536.34	942.707	1708.17	1522.22	2762.8	1231.71	1641.44	1508.35	1094.22	1396.44	1006.34	412.71	1178.18	992.224	2232.8	701.718	2.61038	2.39873	1.74013	2.22075	1.60037	0.65633	1.87364	1.57793	3.5508	1.11594	0.851317	0.805396	0.5847	0.742287	0.600827	0.316902	0.71081	0.561264	1.27663	0.416359	0.455975	0.445691	0.486299	0.456019	0.471784	0.47813
500.768	530.281	1164	634.001	2173.88	2040.95	1625.54	1927.57	1538.74	944.043	1709.5	1523.28	2765.76	1233.95	1643.89	1510.96	1095.55	1397.57	1008.75	414.046	1179.51	993.284	2235.76	703.956	2.61426	2.40286	1.74224	2.22254	1.60421	0.658455	1.87576	1.57961	3.55551	1.1195	0.855201	0.809536	0.586809	0.744084	0.60466	0.319027	0.712925	0.562949	1.28133	0.419918	0.458055	0.447981	0.488052	0.457123	0.474794	0.481335
505.776	531.107	1161.02	631.019	2177.49	2044.42	1628.77	1929.66	1539.07	945.24	1710.93	1524.04	2771.32	1233.92	1647.5	1514.43	1098.77	1399.66	1009.08	415.243	1180.94	994.043	2241.32	703.921	2.62	2.40838	1.74737	2.22587	1.60473	0.660358	1.87803	1.58082	3.56436	1.11944	0.860943	0.815052	0.591942	0.747411	0.605181	0.320931	0.715199	0.564156	1.29018	0.419863	0.46113	0.451034	0.492322	0.459167	0.475203	0.484207
510.783	530.839	1159.83	629.837	2179.98	2045.49	1628.2	1932.67	1540.99	944.205	1713.21	1524.86	2776.6	1236.28	1649.98	1515.5	1098.21	1402.68	1010.99	414.208	1183.22	994.866	2246.6	706.284	2.62396	2.41008	1.74647	2.23067	1.60777	0.658712	1.88166	1.58213	3.57276	1.1232	0.864898	0.816755	0.591042	0.752205	0.608225	0.319285	0.718828	0.565465	1.29858	0.423621	0.463249	0.451977	0.491573	0.462112	0.477593	0.481724
515.791	531.056	1160.8	630.799	2182.77	2045.58	1630.01	1934.41	1542.94	945.23	1712.1	1524.77	2777.76	1236.77	1652.77	1515.58	1100.01	1404.41	1012.95	415.233	1182.1	994.776	2247.77	706.774	2.62839	2.41022	1.74934	2.23343	1.61088	0.660342	1.87989	1.58199	3.57461	1.12398	0.869331	0.816891	0.593906	0.754965	0.611339	0.320915	0.717057	0.565322	1.30043	0.4244	0.465623	0.452052	0.493955	0.463808	0.480038	0.484183
520.799	531.145	1159.38	629.381	2184.46	2051.08	1634.09	1936.7	1541.52	946.305	1714.74	1526.08	2779.87	1236.79	1654.47	1521.08	1104.1	1406.71	1011.52	416.308	1184.75	996.087	2249.87	706.791	2.63109	2.41897	1.75584	2.23708	1.60861	0.662052	1.8841	1.58407	3.57796	1.12401	0.872026	0.825639	0.600407	0.758616	0.609068	0.322624	0.721262	0.567407	1.30378	0.424427	0.467066	0.456893	0.499362	0.466051	0.478255	0.486763
525.806	530.634	1160.38	630.38	2187.09	2051.6	1635.16	1937.02	1541.31	946.125	1717.05	1527.91	2780.67	1237.44	1657.1	1521.61	1105.16	1407.02	1011.32	416.128	1187.05	997.917	2250.68	707.447	2.63527	2.4198	1.75753	2.23757	1.60829	0.661766	1.88775	1.58698	3.57923	1.12505	0.876207	0.826471	0.602099	0.759114	0.608742	0.322338	0.724921	0.570317	1.30506	0.42547	0.469306	0.457353	0.50077	0.466357	0.477999	0.486331
530.814	530.527	1164.06	634.063	2190.15	2055.28	1638.75	1938.12	1542.7	947.682	1718.88	1530.54	2784.76	1241.83	1660.15	1525.28	1108.75	1408.12	1012.71	417.685	1188.89	1000.54	2254.76	711.834	2.64012	2.42564	1.76324	2.23933	1.6105	0.664242	1.89068	1.59115	3.58573	1.13203	0.881064	0.832313	0.607812	0.760869	0.610954	0.324814	0.727847	0.574487	1.31155	0.432447	0.471907	0.460586	0.505521	0.467435	0.479736	0.490067
535.822	530.008	1163.27	633.273	2190.95	2053.41	1636.48	1937.97	1546.61	946.829	1716.11	1531.48	2785.95	1239.92	1660.95	1523.41	1106.49	1407.97	1016.61	416.832	1186.11	1001.49	2255.95	709.923	2.64139	2.42268	1.75964	2.23909	1.61671	0.662885	1.88627	1.59266	3.58763	1.12899	0.882334	0.829346	0.604211	0.760626	0.617163	0.323458	0.723435	0.575995	1.31345	0.429408	0.472588	0.458944	0.502526	0.467286	0.484611	0.48802
540.829	531.185	1166.13	636.132	2196.96	2057.54	1641.57	1943.3	1549.46	949.739	1720.75	1533.32	2792.2	1242.88	1666.96	1527.54	1111.57	1413.3	1019.46	419.742	1190.75	1003.32	2262.2	712.882	2.65096	2.42924	1.76773	2.24757	1.62124	0.667513	1.89365	1.59557	3.59756	1.13369	0.891898	0.835906	0.612298	0.769107	0.621698	0.328085	0.730813	0.578911	1.32339	0.434113	0.47771	0.462574	0.509252	0.472496	0.488173	0.495002
545.837	530.77	1165.63	635.629	2194.09	2060.8	1641.82	1943.57	1549.01	949.722	1722.35	1534.9	2791.74	1244.51	1664.1	1530.8	1111.82	1413.57	1019.01	419.725	1192.36	1004.9	2261.74	714.508	2.6464	2.43442	1.76812	2.24799	1.62053	0.667486	1.89619	1.59809	3.59683	1.13628	0.887341	0.84109	0.612687	0.769533	0.620984	0.328058	0.733361	0.581425	1.32266	0.436699	0.475269	0.465443	0.509576	0.472758	0.487612	0.494961
550.845	530.793	1167.27	637.276	2200.06	2065.38	1641.73	1946.9	1552.12	950.782	1723.96	1538.52	2796.14	1245.01	1670.06	1535.39	1111.74	1416.91	1022.12	420.785	1193.96	1008.52	2266.15	715.012	2.65589	2.44171	1.76799	2.2533	1.62547	0.669172	1.89875	1.60385	3.60384	1.13708	0.896832	0.848385	0.612557	0.774837	0.625928	0.329744	0.735918	0.587186	1.32966	0.437501	0.480352	0.46948	0.509468	0.476016	0.491494	0.497505
555.852	531.806	1167.2	637.204	2206.72	2070.49	1648.1	1950.57	1557.22	952.749	1730.42	1540.89	2807.11	1249.92	1676.72	1540.49	1118.11	1420.57	1027.22	422.752	1200.42	1010.89	2277.11	719.927	2.66648	2.44984	1.77812	2.25912	1.63359	0.6723	1.90902	1.60761	3.62127	1.1449	0.907418	0.856508	0.622686	0.780664	0.634042	0.332872	0.746185	0.590951	1.3471	0.445317	0.486023	0.473975	0.517892	0.479596	0.497865	0.502224
560.86	531.083	1167.29	637.289	2206.35	2070.41	1647.99	1949.7	1557.11	953.185	1732.18	1540.78	2809.43	1250.78	1676.35	1540.42	1118	1419.7	1027.11	423.188	1202.18	1010.78	2279.44	720.782	2.66589	2.44971	1.77794	2.25774	1.63341	0.672993	1.91182	1.60744	3.62497	1.14625	0.906828	0.856384	0.622511	0.779277	0.633862	0.333566	0.748987	0.590772	1.35079	0.446677	0.485707	0.473906	0.517746	0.478744	0.497724	0.50327
565.868	531.038	1164.32	634.326	2205.88	2066.47	1646.66	1950.65	1554.41	953.282	1727.49	1539.54	2807.85	1247.01	1675.88	1536.47	1116.67	1420.65	1024.42	423.285	1197.5	1009.54	2277.85	717.01	2.66514	2.44344	1.77583	2.25926	1.62912	0.673148	1.90437	1.60546	3.62245	1.14026	0.906077	0.850112	0.6204	0.780796	0.629576	0.33372	0.741535	0.5888	1.34827	0.440678	0.485305	0.470436	0.515991	0.479677	0.494359	0.503503
570.875	531.739	1162.83	632.834	2211.7	2072.74	1647.9	1953.16	1558.69	955.601	1731.8	1543.09	2816.49	1249.61	1681.7	1542.74	1117.91	1423.16	1028.69	425.604	1201.8	1013.09	2286.49	719.617	2.6744	2.45341	1.7778	2.26325	1.63592	0.676835	1.91121	1.61111	3.63619	1.1444	0.915338	0.860078	0.622368	0.784787	0.636376	0.337408	0.748378	0.594445	1.36202	0.444824	0.490265	0.475951	0.517627	0.482129	0.499698	0.509067
575.883	531.404	1160.57	630.577	2207.9	2069.74	1648.58	1950.21	1557.48	953.805	1731.83	1541.43	2811.27	1248.27	1677.9	1539.74	1118.58	1420.22	1027.49	423.808	1201.84	1011.43	2281.27	718.269	2.66835	2.44864	1.77887	2.25856	1.634	0.673979	1.91127	1.60847	3.62789	1.14226	0.909291	0.855309	0.623444	0.780099	0.634457	0.334552	0.748438	0.591809	1.35371	0.44268	0.487026	0.473312	0.518522	0.479249	0.498191	0.504758
580.891	531.152	1162.28	632.28	2214.72	2073.65	1654.7	1957.71	1562.36	956.49	1736.52	1542.97	2820.16	1252.72	1684.73	1543.65	1124.71	1427.72	1032.37	426.493	1206.52	1012.97	2290.16	722.728	2.67921	2.45486	1.78861	2.27049	1.64176	0.678249	1.91873	1.61092	3.64203	1.14935	0.920148	0.861527	0.633183	0.792025	0.642218	0.338821	0.755892	0.594259	1.36785	0.449771	0.492841	0.476752	0.526622	0.486575	0.504285	0.5112
585.898	532.281	1160.33	630.333	2219.87	2077.14	1656.17	1958.88	1562.07	956.714	1735.06	1545.13	2818.09	1253.46	1689.87	1547.14	1126.17	1428.88	1032.07	426.717	1205.06	1015.14	2288.1	723.464	2.68739	2.46041	1.79094	2.27234	1.6413	0.678605	1.9164	1.61436	3.63874	1.15052	0.928334	0.86708	0.635511	0.793884	0.641753	0.339178	0.753567	0.597699	1.36457	0.450942	0.497225	0.479826	0.528559	0.487717	0.50392	0.511738
590.906	531.499	1162.65	632.651	2220.82	2079.77	1655.55	1958.2	1560.94	954.098	1735.52	1547.91	2822.42	1255.33	1690.83	1549.77	1125.56	1428.21	1030.94	424.101	1205.52	1017.91	2292.43	725.333	2.68891	2.46459	1.78996	2.27127	1.6395	0.674445	1.91714	1.61878	3.64563	1.15349	0.929852	0.871263	0.634533	0.792806	0.639955	0.335018	0.754301	0.602117	1.37145	0.453914	0.498039	0.48214	0.527745	0.487055	0.502508	0.505461
595.914	530.425	1164.03	634.033	2219.54	2081.47	1658	1959.5	1562.89	955.67	1736.5	1545.27	2822.39	1254.77	1689.54	1551.48	1128	1429.5	1032.89	425.673	1206.51	1015.28	2292.4	724.775	2.68686	2.4673	1.79385	2.27333	1.6426	0.676945	1.9187	1.61459	3.64558	1.1526	0.927804	0.873973	0.63842	0.79487	0.643056	0.337517	0.755863	0.597925	1.3714	0.453027	0.496942	0.48364	0.530978	0.488323	0.504943	0.509233
600.921	531.953	1159.98	629.981	2222.62	2078.59	1658.65	1963.2	1562.9	956.312	1735.37	1547.66	2820.62	1255.08	1692.62	1548.6	1128.65	1433.21	1032.9	426.315	1205.37	1017.66	2290.62	725.078	2.69177	2.46272	1.79489	2.27922	1.64262	0.677966	1.9169	1.61838	3.64276	1.15309	0.932709	0.869394	0.639462	0.800756	0.643072	0.338538	0.754061	0.601719	1.36858	0.453509	0.499569	0.481106	0.531844	0.491939	0.504956	0.510773
605.929	532.548	1162.15	632.149	2226.2	2087.1	1661.92	1964.47	1568.29	958.788	1742.82	1552.28	2833.67	1259.02	1696.21	1557.1	1131.93	1434.48	1038.29	428.791	1212.82	1022.28	2303.67	729.023	2.69747	2.47625	1.80009	2.28124	1.65119	0.681904	1.92874	1.62573	3.66351	1.15936	0.938408	0.882923	0.644665	0.802777	0.651642	0.342476	0.765904	0.609062	1.38933	0.459782	0.502621	0.488593	0.536172	0.493181	0.511685	0.516714
610.937	530.786	1163.01	633.018	2228.21	2089.61	1663.88	1965.42	1566.85	959.64	1743.74	1551.12	2832.64	1259.85	1698.21	1559.61	1133.88	1435.43	1036.85	429.643	1213.75	1021.13	2302.64	729.85	2.70065	2.48024	1.80321	2.28275	1.6489	0.683259	1.93021	1.62389	3.66187	1.16068	0.941592	0.886913	0.647779	0.804288	0.649352	0.343831	0.767377	0.607226	1.38769	0.461098	0.504327	0.490801	0.538762	0.494109	0.509887	0.518758
615.944	531.955	1162.54	632.546	2228.52	2089.08	1663.11	1965.5	1568.91	958.96	1744.33	1551.61	2832.78	1259.3	1698.52	1559.08	1133.11	1435.51	1038.91	428.963	1214.34	1021.61	2302.78	729.306	2.70115	2.4794	1.80198	2.28288	1.65217	0.682177	1.93115	1.62467	3.6621	1.15981	0.942091	0.88607	0.646553	0.804415	0.652628	0.34275	0.768315	0.608002	1.38792	0.460232	0.504594	0.490334	0.537742	0.494187	0.512459	0.517127
620.952	531.733	1162.27	632.273	2231.89	2090.04	1666.6	1967.65	1570.79	959.903	1745.17	1553.21	2837.84	1260.29	1701.9	1560.04	1136.6	1437.66	1040.79	429.906	1215.18	1023.22	2307.84	730.296	2.70651	2.48092	1.80753	2.2863	1.65516	0.683677	1.93249	1.62722	3.67014	1.16139	0.947454	0.88759	0.652097	0.807836	0.655614	0.344249	0.769654	0.610553	1.39596	0.461807	0.507466	0.491175	0.542353	0.496288	0.514804	0.519389
625.96	530.453	1161.31	631.317	2233.3	2088.77	1664.41	1968.49	1568.62	960.522	1745.55	1552.71	2837.9	1261.36	1703.31	1558.77	1134.41	1438.5	1038.62	430.525	1215.55	1022.71	2307.9	731.361	2.70876	2.4789	1.80405	2.28763	1.65172	0.684661	1.93308	1.62641	3.67024	1.16308	0.949696	0.885574	0.648617	0.809171	0.65217	0.345234	0.770244	0.609749	1.39606	0.4635	0.508667	0.49006	0.539459	0.497109	0.5121	0.520875
630.967	530.967	1164.02	634.02	2233.97	2093.48	1670.04	1970.95	1571.17	961.906	1747.46	1556.7	2845.9	1265.45	1703.98	1563.48	1140.05	1440.95	1041.17	431.909	1217.47	1026.71	2315.9	735.456	2.70982	2.48639	1.81301	2.29154	1.65577	0.686862	1.93613	1.63276	3.68296	1.16959	0.950765	0.893063	0.657577	0.813077	0.65622	0.347435	0.773293	0.6161	1.40879	0.470013	0.50924	0.494204	0.546911	0.499509	0.51528	0.524195
635.975	531.43	1165.38	635.388	2235.95	2097.27	1671.25	1972.79	1572.74	964.514	1753.43	1558.71	2849.94	1263.96	1705.95	1567.28	1141.25	1442.79	1042.75	434.517	1223.44	1028.72	2319.94	733.964	2.71296	2.49243	1.81493	2.29446	1.65827	0.69101	1.94562	1.63596	3.68938	1.16722	0.953902	0.899098	0.659499	0.816003	0.658725	0.351582	0.782788	0.6193	1.41521	0.46764	0.51092	0.497543	0.54851	0.501306	0.517247	0.530453
640.983	530.605	1164.2	634.206	2239.46	2098.2	1671.89	1975.12	1574.83	961.995	1751.38	1557.73	2850.74	1266.04	1709.46	1568.2	1141.89	1445.12	1044.83	431.998	1221.38	1027.73	2320.75	736.043	2.71854	2.4939	1.81594	2.29817	1.66159	0.687004	1.94235	1.6344	3.69067	1.17052	0.959483	0.900575	0.660516	0.819707	0.662045	0.347576	0.779516	0.617735	1.41649	0.470946	0.513909	0.498361	0.549355	0.503582	0.519854	0.524409
645.991	530.048	1164.4	634.403	2243.44	2103.47	1673.66	1975.76	1576.91	964.006	1750.77	1559.55	2850.2	1266.44	1713.45	1573.48	1143.67	1445.76	1046.92	434.009	1220.78	1029.55	2320.2	736.446	2.72488	2.50229	1.81876	2.29919	1.66491	0.690202	1.94139	1.63729	3.6898	1.17117	0.965823	0.908959	0.663334	0.820726	0.665361	0.350774	0.778557	0.620629	1.41562	0.471587	0.517305	0.503	0.551699	0.504208	0.522458	0.529234
650.998	531.557	1162.91	632.911	2243.51	2103.11	1676.67	1976.79	1577.63	963.673	1753.82	1561.05	2853.16	1265.63	1713.52	1573.11	1146.67	1446.79	1047.63	433.676	1223.83	1031.05	2323.16	735.632	2.725	2.50171	1.82355	2.30082	1.66604	0.689672	1.94624	1.63968	3.69451	1.16987	0.965936	0.908382	0.668119	0.82236	0.666492	0.350245	0.78341	0.623015	1.42033	0.470293	0.517366	0.502681	0.555679	0.505211	0.523346	0.528435
656.006	530.842	1161.35	631.353	2244.44	2102.4	1677.65	1974.08	1579.71	965.386	1751.33	1559.07	2851.68	1266	1714.44	1572.4	1147.66	1444.09	1049.72	435.389	1221.34	1029.08	2321.68	736.004	2.72646	2.50058	1.82511	2.29652	1.66936	0.692396	1.94228	1.63653	3.69216	1.17046	0.967401	0.907248	0.669679	0.818061	0.669812	0.352969	0.779447	0.619869	1.41798	0.470884	0.51815	0.502054	0.556976	0.50257	0.525953	0.532545
661.014	529.81	1163.66	633.668	2247.49	2105.39	1678.58	1974.21	1576.64	965.265	1754.17	1564.13	2855.29	1265.81	1717.5	1575.39	1148.58	1444.22	1046.64	435.268	1224.17	1034.13	2325.29	735.809	2.73133	2.50533	1.82658	2.29673	1.66446	0.692204	1.94679	1.64457	3.6979	1.17015	0.972265	0.912001	0.671147	0.818266	0.664917	0.352776	0.783954	0.627905	1.42372	0.470574	0.520756	0.504684	0.558197	0.502696	0.52211	0.532255
666.021	531.287	1163.19	633.195	2252.91	2110.67	1681.99	1979.77	1582.84	967.014	1756.69	1564.66	2861.79	1270.37	1722.92	1580.67	1151.99	1449.77	1052.84	437.017	1226.69	1034.66	2331.79	740.371	2.73994	2.51373	1.832	2.30556	1.67433	0.694985	1.9508	1.64542	3.70824	1.17741	0.980885	0.920404	0.676573	0.8271	0.674785	0.355558	0.787968	0.628756	1.43406	0.477829	0.525372	0.509334	0.56271	0.508124	0.529858	0.536451
671.029	530.658	1163.23	633.231	2252.35	2108.16	1680.04	1979.51	1579.34	966.764	1759.04	1564.08	2858.14	1269.58	1722.35	1578.17	1150.04	1449.51	1049.34	436.767	1229.05	1034.09	2328.15	739.58	2.73904	2.50975	1.8289	2.30515	1.66876	0.694588	1.95454	1.6445	3.70243	1.17615	0.97998	0.916421	0.673472	0.826692	0.669219	0.35516	0.79171	0.627837	1.42826	0.476571	0.524888	0.50713	0.560131	0.507873	0.525487	0.535851
676.037	531.194	1163.83	633.836	2254.18	2107.61	1681.78	1981.66	1583.24	967.381	1760.33	1566.33	2868.22	1272.33	1724.18	1577.61	1151.79	1451.66	1053.25	437.384	1230.34	1036.33	2338.22	742.334	2.74195	2.50886	1.83168	2.30857	1.67497	0.695569	1.95659	1.64807	3.71845	1.18053	0.98289	0.915533	0.676248	0.830106	0.675423	0.356141	0.79376	0.631407	1.44428	0.480951	0.526446	0.506639	0.56244	0.50997	0.530359	0.537332
681.044	531.075	1165.62	635.623	2256.08	2109.86	1679.73	1981.95	1582.39	967.375	1760.9	1563.86	2866.25	1271.99	1726.08	1579.87	1149.74	1451.95	1052.4	437.378	1230.91	1033.87	2336.25	741.996	2.74498	2.51245	1.82842	2.30903	1.67362	0.69556	1.9575	1.64415	3.71532	1.17999	0.985917	0.919123	0.672988	0.83057	0.674073	0.356132	0.794671	0.627487	1.44115	0.480413	0.528067	0.508625	0.559729	0.510255	0.529298	0.537317
686.052	530.909	1165.03	635.033	2259.09	2114.66	1684.26	1984.98	1585.05	969.733	1761.66	1568.5	2868.82	1273.9	1729.09	1584.67	1154.26	1454.98	1055.05	439.736	1231.66	1038.5	2338.82	743.901	2.74976	2.52009	1.83562	2.31385	1.67784	0.699309	1.95871	1.65152	3.71941	1.18302	0.990703	0.926758	0.680186	0.835391	0.678295	0.359882	0.795873	0.634859	1.44523	0.483443	0.530631	0.51285	0.565715	0.513217	0.532614	0.542975
691.06	531.014	1166.21	636.211	2259.27	2113.83	1684.45	1986.03	1585.34	969.226	1763.84	1568.98	2869.66	1274.05	1729.27	1583.84	1154.46	1456.03	1055.34	439.229	1233.84	1038.98	2339.66	744.057	2.75005	2.51876	1.83592	2.31552	1.6783	0.698503	1.96217	1.65229	3.72075	1.18327	0.990986	0.925433	0.680494	0.837056	0.678756	0.359075	0.799335	0.635623	1.44657	0.483691	0.530783	0.512117	0.565971	0.51424	0.532976	0.541759
696.067	531.51	1163.27	633.277	2258.66	2115.49	1687.36	1986.41	1586.56	969.441	1763.7	1571.71	2873.11	1274.48	1728.67	1585.49	1157.37	1456.42	1056.56	439.444	1233.7	1041.72	2343.11	744.484	2.74908	2.52139	1.84055	2.31613	1.68025	0.698845	1.96194	1.65663	3.72624	1.18395	0.990024	0.928063	0.685124	0.837671	0.6807	0.359417	0.79911	0.639969	1.45206	0.48437	0.530268	0.513572	0.569822	0.514618	0.534502	0.542275
701.075	531.119	1165.84	635.845	2264.99	2119.34	1687.33	1990.32	1588.87	971.329	1764.29	1570.05	2875.5	1278.07	1734.99	1589.35	1157.34	1460.33	1058.87	441.332	1234.3	1040.05	2345.5	748.073	2.75915	2.52753	1.8405	2.32235	1.68391	0.701848	1.96289	1.65399	3.73003	1.18966	1.00009	0.934199	0.685074	0.843887	0.684368	0.36242	0.800057	0.637324	1.45585	0.490077	0.535658	0.516968	0.569781	0.518437	0.537383	0.546805
706.083	531.014	1160.58	630.579	2264.76	2120.45	1689.53	1989.19	1588.02	970.847	1761.19	1570.79	2878.1	1276.1	1734.77	1590.45	1159.53	1459.2	1058.03	440.85	1231.19	1040.8	2348.11	746.101	2.75879	2.52929	1.844	2.32055	1.68257	0.701081	1.95796	1.65517	3.73418	1.18652	0.99973	0.935956	0.68857	0.842089	0.683028	0.361653	0.795126	0.638506	1.46	0.486941	0.535466	0.51794	0.572688	0.517332	0.53633	0.545648
711.09	532.084	1162.71	632.713	2267.14	2124.92	1692.46	1991.35	1590.85	971.67	1767.19	1572.9	2883.26	1277.05	1737.14	1594.93	1162.46	1461.36	1060.85	441.673	1237.2	1042.9	2353.27	747.048	2.76257	2.5364	1.84866	2.32398	1.68707	0.70239	1.96751	1.65852	3.74238	1.18803	1.00351	0.943072	0.693228	0.845524	0.687523	0.362962	0.804672	0.641853	1.46821	0.488447	0.537489	0.521878	0.576562	0.519442	0.53986	0.547623
716.098	532.316	1162.48	632.488	2270.11	2125.11	1692.34	1994.32	1590.88	971.926	1766.14	1574.43	2885.63	1278.44	1740.12	1595.11	1162.34	1464.32	1060.88	441.929	1236.15	1044.44	2355.64	748.44	2.7673	2.5367	1.84846	2.3287	1.68711	0.702797	1.96583	1.66096	3.74615	1.19024	1.00824	0.943368	0.693032	0.850242	0.687566	0.363369	0.803001	0.644299	1.47197	0.490661	0.540023	0.522042	0.576399	0.522341	0.539894	0.548237
721.106	530.783	1164.3	634.307	2273.78	2128.57	1693.95	1997.77	1590.67	973.157	1768.93	1575.26	2890.36	1281.27	1743.78	1598.58	1163.95	1467.78	1060.67	443.16	1238.94	1045.26	2360.36	751.277	2.77313	2.5422	1.85102	2.33419	1.68678	0.704755	1.97027	1.66227	3.75366	1.19475	1.01407	0.948875	0.695594	0.855732	0.687237	0.365327	0.807438	0.645605	1.47948	0.495173	0.543146	0.525089	0.57853	0.525713	0.539636	0.551191
726.113	528.876	1159.92	629.922	2269.56	2124.96	1693.54	1993.21	1587.77	972.064	1764.35	1575.46	2888.35	1279.38	1739.56	1594.96	1163.54	1463.22	1057.78	442.067	1234.35	1045.46	2358.35	749.379	2.76641	2.53646	1.85037	2.32694	1.68218	0.703016	1.96298	1.66259	3.75047	1.19173	1.00735	0.943128	0.694941	0.848482	0.68263	0.363589	0.80015	0.645929	1.47629	0.492154	0.539548	0.521909	0.577986	0.521259	0.536018	0.548568
731.121	531.07	1163.19	633.193	2274.49	2131.37	1696.61	2000.5	1593.35	973.723	1763.43	1576.43	2893.24	1280.58	1744.49	1601.37	1166.61	1470.5	1063.35	443.726	1233.43	1046.43	2363.25	750.578	2.77426	2.54665	1.85526	2.33853	1.69104	0.705655	1.96152	1.66414	3.75826	1.19364	1.0152	0.953322	0.699829	0.860066	0.691494	0.366227	0.798682	0.647472	1.48408	0.494061	0.543749	0.52755	0.582052	0.528376	0.542978	0.552549
736.129	529.231	1161.86	631.867	2270.51	2126.92	1693.34	1997.69	1589.75	972.458	1763.79	1574.31	2887.18	1280.6	1740.51	1596.92	1163.34	1467.69	1059.76	442.461	1233.79	1044.31	2357.18	750.606	2.76793	2.53957	1.85005	2.33406	1.68532	0.703643	1.96209	1.66076	3.74861	1.19368	1.00887	0.94624	0.694619	0.855598	0.685777	0.364215	0.799256	0.644096	1.47443	0.494106	0.540359	0.523631	0.577719	0.525631	0.538489	0.549513
741.136	531.233	1163.93	633.937	2275.14	2133.71	1698.2	2002.37	1594.22	974.969	1768.88	1579.89	2896.91	1282.97	1745.15	1603.71	1168.2	1472.37	1064.22	444.972	1238.89	1049.9	2366.91	752.97	2.7753	2.55037	1.85779	2.3415	1.69243	0.707636	1.9702	1.66965	3.76409	1.19744	1.01624	0.95704	0.702356	0.863036	0.692883	0.368209	0.807362	0.652982	1.48991	0.497865	0.544307	0.529608	0.584154	0.530201	0.544069	0.555538
746.144	530.821	1161.03	631.032	2274.41	2131.04	1694.47	1998.72	1593.4	975.32	1766.43	1578.86	2891.42	1282.7	1744.41	1601.04	1164.48	1468.72	1063.41	445.323	1236.44	1048.86	2361.42	752.701	2.77413	2.54613	1.85186	2.3357	1.69113	0.708194	1.9663	1.668	3.75535	1.19702	1.01507	0.952799	0.696431	0.857241	0.691584	0.368767	0.803465	0.651336	1.48117	0.497437	0.54368	0.52726	0.579226	0.52664	0.543048	0.55638
751.152	530.31	1160.68	630.679	2278.6	2133.64	1698.23	1998.81	1594.04	976.818	1769.57	1579.01	2893.8	1282.97	1748.6	1603.64	1168.24	1468.82	1064.04	446.821	1239.58	1049.01	2363.81	752.969	2.78079	2.55026	1.85784	2.33585	1.69214	0.710577	1.97129	1.66823	3.75915	1.19744	1.02173	0.956932	0.702412	0.857389	0.692597	0.371149	0.808456	0.651569	1.48497	0.497864	0.547249	0.529548	0.5842	0.526731	0.543844	0.559975
756.159	530.795	1159.6	629.599	2280.51	2132.41	1700.27	2002.08	1597.01	976.823	1769.02	1580.61	2898.08	1283.49	1750.51	1602.41	1170.27	1472.08	1067.01	446.826	1239.02	1050.61	2368.09	753.495	2.78382	2.54831	1.86107	2.34104	1.69687	0.710585	1.9704	1.67078	3.76595	1.19828	1.02476	0.954976	0.705645	0.862581	0.69732	0.371157	0.807568	0.654118	1.49177	0.4987	0.548873	0.528465	0.586889	0.529921	0.547553	0.559987
761.167	530.593	1163.24	633.242	2283.26	2136.71	1701.42	2004.34	1596.31	977.574	1773.51	1583.31	2904.47	1284.2	1753.26	1606.72	1171.43	1474.35	1066.32	447.577	1243.51	1053.31	2374.47	754.202	2.7882	2.55515	1.86291	2.34464	1.69575	0.711779	1.97755	1.67508	3.77611	1.1994	1.02914	0.961819	0.707485	0.866183	0.696208	0.372351	0.814714	0.658415	1.50193	0.499824	0.551218	0.532252	0.58842	0.532134	0.54668	0.561789
766.175	530.929	1164.61	634.609	2284.97	2141.48	1701.77	2007.42	1599.67	979.084	1774.79	1584.52	2901.91	1286.17	1754.97	1611.48	1171.77	1477.43	1069.67	449.087	1244.79	1054.52	2371.91	756.172	2.79092	2.56273	1.86345	2.34954	1.7011	0.71418	1.97958	1.67699	3.77204	1.20254	1.03186	0.969398	0.708026	0.871078	0.70155	0.374753	0.816746	0.660331	1.49786	0.502957	0.552673	0.536446	0.588869	0.535141	0.550874	0.565412
771.182	531.824	1160.77	630.775	2288.62	2142.57	1704.88	2009.15	1598.49	978.727	1774.52	1585.14	2910.44	1287.43	1758.62	1612.58	1174.88	1479.16	1068.5	448.73	1244.53	1055.14	2380.44	757.436	2.79672	2.56447	1.8684	2.35229	1.69922	0.713613	1.97916	1.67799	3.7856	1.20455	1.03766	0.971138	0.712973	0.873831	0.699675	0.374185	0.816326	0.661322	1.51142	0.504967	0.555783	0.537409	0.592984	0.536832	0.549402	0.564555
776.19	532.235	1162.06	632.065	2287.39	2139.42	1702.67	2011.35	1600.55	976.983	1774.04	1582.38	2907.32	1288.97	1757.39	1609.43	1172.68	1481.36	1070.55	446.986	1244.05	1052.39	2377.33	758.976	2.79476	2.55946	1.8649	2.35579	1.70249	0.710839	1.9784	1.6736	3.78065	1.20699	1.0357	0.966132	0.70947	0.877328	0.702943	0.371411	0.815566	0.656939	1.50647	0.507416	0.554733	0.534639	0.59007	0.538981	0.551968	0.560371
781.198	532.534	1161.87	631.875	2288.42	2145.25	1706.22	2009.44	1602.79	977.63	1776.58	1585.35	2908.06	1289.44	1758.43	1615.25	1176.22	1479.45	1072.79	447.633	1246.58	1055.35	2378.06	759.44	2.79641	2.56872	1.87053	2.35275	1.70606	0.711868	1.98243	1.67832	3.78182	1.20773	1.03735	0.975395	0.715104	0.874292	0.70651	0.37244	0.819601	0.661653	1.50764	0.508154	0.555616	0.539765	0.594756	0.537116	0.554769	0.561923
786.206	531.06	1160.11	630.117	2287.79	2146.57	1705.13	2010.11	1602.62	978.106	1776.07	1585.2	2910.85	1288.57	1757.8	1616.58	1175.13	1480.11	1072.62	448.109	1246.08	1055.2	2380.86	758.572	2.79541	2.57083	1.8688	2.35381	1.70578	0.712625	1.98163	1.67808	3.78626	1.20635	1.03635	0.977502	0.713375	0.875353	0.706235	0.373197	0.818793	0.661417	1.51208	0.506774	0.55508	0.540931	0.593319	0.537767	0.554553	0.563065
791.213	532.659	1162.83	632.834	2291.38	2146.79	1707.03	2010.95	1602.56	979.744	1778.45	1586.89	2915.26	1289.77	1761.38	1616.79	1177.03	1480.96	1072.56	449.747	1248.46	1056.89	2385.26	759.774	2.80111	2.57117	1.87182	2.35515	1.70568	0.71523	1.98541	1.68077	3.79327	1.20826	1.04205	0.977841	0.716395	0.876694	0.706138	0.375802	0.822576	0.664106	1.51909	0.508685	0.558132	0.541118	0.59583	0.538591	0.554477	0.566995
796.221	531.074	1162.64	632.638	2292	2148.48	1709.43	2015.08	1602.26	981.455	1780.32	1587.45	2916.52	1291.73	1762.01	1618.48	1179.43	1485.08	1072.26	451.458	1250.33	1057.45	2386.52	761.732	2.8021	2.57386	1.87564	2.36171	1.7052	0.717951	1.98839	1.68166	3.79527	1.21138	1.04304	0.980527	0.72021	0.883254	0.705659	0.378523	0.825551	0.664992	1.52109	0.511799	0.558666	0.542605	0.599004	0.542621	0.554101	0.571101
801.229	531.473	1164.48	634.485	2294.49	2151.7	1712.21	2018.5	1604.27	981.875	1781.13	1591.08	2915.73	1290.2	1764.5	1621.7	1182.22	1488.51	1074.28	451.878	1251.13	1061.08	2385.73	760.205	2.80607	2.57899	1.88007	2.36716	1.70841	0.718619	1.98967	1.68743	3.79401	1.20895	1.04701	0.985656	0.724639	0.888702	0.708867	0.379191	0.826835	0.670763	1.51983	0.509371	0.560789	0.545443	0.602687	0.545968	0.55662	0.572108
806.236	532.402	1161.79	631.797	2294.81	2150.93	1708.23	2015.62	1607.58	982.489	1779.78	1589.41	2915.58	1291.79	1764.81	1620.93	1178.24	1485.63	1077.59	452.492	1249.78	1059.42	2385.59	761.795	2.80657	2.57776	1.87374	2.36258	1.71368	0.719595	1.98752	1.68479	3.79378	1.21148	1.04751	0.98443	0.718312	0.884119	0.714132	0.380168	0.824685	0.668122	1.5196	0.511899	0.561055	0.544764	0.597424	0.543152	0.560754	0.573581
811.244	531.245	1159.19	629.191	2299.2	2153.41	1712.73	2020.34	1609.14	983.21	1783.24	1590.39	2922.95	1292.33	1769.2	1623.41	1182.73	1490.35	1079.15	453.213	1253.24	1060.4	2392.96	762.334	2.81355	2.5817	1.88089	2.37009	1.71616	0.720742	1.99302	1.68634	3.80551	1.21233	1.05449	0.988372	0.72546	0.891628	0.716616	0.381314	0.830184	0.66968	1.53133	0.512757	0.564797	0.546946	0.60337	0.547766	0.562705	0.575311
816.252	531.181	1163.14	633.142	2306.72	2157.51	1716.58	2024.25	1606.94	983.864	1786.04	1592.14	2931.33	1297.24	1776.72	1627.51	1186.59	1494.25	1076.94	453.867	1256.05	1062.14	2401.34	767.245	2.8255	2.58822	1.88702	2.37629	1.71265	0.721782	1.99748	1.68911	3.81883	1.22014	1.06644	0.994895	0.731592	0.897833	0.713103	0.382354	0.834649	0.672449	1.54465	0.520567	0.571199	0.550556	0.60847	0.551578	0.559946	0.576881
821.259	531.689	1162.42	632.422	2305.54	2159.51	1716.42	2022.23	1607.62	982.864	1785.28	1593.57	2931.64	1294.85	1775.54	1629.51	1186.42	1492.24	1077.62	452.867	1255.29	1063.57	2401.65	764.857	2.82363	2.5914	1.88676	2.37309	1.71374	0.720192	1.99627	1.69139	3.81932	1.21635	1.06457	0.998073	0.731327	0.894632	0.71419	0.380764	0.833439	0.67473	1.54514	0.516769	0.570195	0.552314	0.608249	0.549611	0.560799	0.574481
826.267	532.031	1160.92	630.919	2303.96	2157.31	1716.95	2024.93	1609.53	983.839	1786.85	1596.13	2935.11	1295.51	1773.96	1627.31	1186.95	1494.93	1079.53	453.842	1256.85	1066.14	2405.11	765.515	2.82112	2.58791	1.8876	2.37738	1.71677	0.721742	1.99876	1.69547	3.82484	1.21739	1.06206	0.994577	0.732174	0.89892	0.717227	0.382314	0.83593	0.678804	1.55066	0.517815	0.56885	0.55038	0.608954	0.552245	0.563184	0.576821
831.275	532.514	1162.29	632.288	2304.47	2158.02	1716.69	2021.58	1607.03	983.367	1786.25	1591.49	2935.37	1293.75	1774.47	1628.03	1186.7	1491.59	1077.03	453.37	1256.25	1061.5	2405.38	763.755	2.82193	2.58904	1.8872	2.37206	1.71279	0.720991	1.99781	1.68809	3.82525	1.21459	1.06287	0.995708	0.731769	0.893598	0.713248	0.381564	0.834972	0.67143	1.55107	0.515016	0.569284	0.551006	0.608617	0.548976	0.56006	0.575688
836.282	531.273	1161.3	631.305	2303.81	2159.3	1717.38	2024.41	1607.59	984.108	1786.09	1594.16	2934.22	1294.35	1773.81	1629.31	1187.38	1494.42	1077.6	454.111	1256.09	1064.16	2404.23	764.355	2.82088	2.59107	1.88829	2.37656	1.71369	0.72217	1.99755	1.69233	3.82343	1.21555	1.06182	0.997745	0.73286	0.898099	0.714147	0.382742	0.834719	0.675663	1.54925	0.515971	0.568723	0.552133	0.609524	0.551741	0.560765	0.577466
841.29	530.712	1161.76	631.763	2308.7	2163.99	1716.4	2027.69	1607.28	985.381	1788	1594.31	2937.53	1295.31	1778.71	1633.99	1186.4	1497.69	1077.29	455.384	1258.01	1064.31	2407.53	765.314	2.82867	2.59852	1.88673	2.38177	1.7132	0.724194	2.0006	1.69257	3.82868	1.21707	1.06961	1.00519	0.731298	0.903312	0.713655	0.384767	0.837765	0.675908	1.5545	0.517496	0.572892	0.556255	0.608225	0.554944	0.56038	0.58052
846.298	529.902	1159.86	629.864	2308.76	2163.21	1718.38	2024.12	1610.52	985.781	1787.73	1592.68	2936.88	1296.14	1778.77	1633.21	1188.38	1494.12	1080.52	455.784	1257.73	1062.68	2406.88	766.147	2.82876	2.59729	1.88988	2.37609	1.71835	0.72483	2.00017	1.68997	3.82765	1.2184	1.0697	1.00396	0.734447	0.897628	0.718803	0.385403	0.837332	0.673308	1.55347	0.51882	0.572942	0.555571	0.610844	0.551452	0.564422	0.58148
851.305	532.272	1163.73	633.734	2311.11	2160.51	1721.52	2029.42	1610.61	986.355	1788.32	1596.31	2936.3	1300.13	1781.12	1630.51	1191.52	1499.43	1080.61	456.358	1258.32	1066.31	2406.3	770.132	2.8325	2.59299	1.89486	2.38453	1.71849	0.725743	2.0011	1.69575	3.82673	1.22474	1.07344	0.999661	0.739434	0.906065	0.718943	0.386316	0.838266	0.679082	1.55255	0.525158	0.574946	0.553193	0.614992	0.556635	0.564532	0.582857
856.313	531.235	1161.69	631.689	2312.49	2162.45	1719.61	2026.26	1609.16	986.413	1790.2	1598.04	2936.27	1298.82	1782.49	1632.46	1189.61	1496.26	1079.16	456.416	1260.2	1068.04	2406.28	768.82	2.83469	2.59608	1.89183	2.3795	1.71618	0.725836	2.00409	1.6985	3.82668	1.22265	1.07563	1.00275	0.736404	0.901038	0.716635	0.386408	0.84126	0.681837	1.55251	0.523071	0.576117	0.554905	0.612472	0.553547	0.56272	0.582997
861.321	530.319	1161.44	631.439	2311.82	2163.62	1719.68	2024.43	1607.2	986.114	1790.76	1595.69	2935.46	1299.5	1781.83	1633.62	1189.69	1494.44	1077.21	456.117	1260.76	1065.69	2405.46	769.504	2.83363	2.59793	1.89195	2.37659	1.71307	0.72536	2.00498	1.69476	3.82539	1.22374	1.07457	1.0046	0.736522	0.898134	0.713526	0.385932	0.842151	0.678095	1.55121	0.524159	0.575551	0.555929	0.61257	0.551763	0.560278	0.582279
866.328	530.994	1160.27	630.271	2313.86	2164.96	1721.3	2028.12	1610.1	987.534	1790.96	1597.39	2941.22	1298.74	1783.87	1634.96	1191.31	1498.12	1080.1	457.537	1260.96	1067.4	2411.22	768.745	2.83687	2.60007	1.89452	2.38245	1.71768	0.727618	2.0053	1.69747	3.83455	1.22253	1.07781	1.00674	0.739095	0.903989	0.71813	0.388191	0.842467	0.680809	1.56037	0.522952	0.577288	0.55711	0.61471	0.55536	0.563894	0.585686
871.336	530.156	1159.84	629.845	2316.7	2166.74	1722.68	2029.71	1612.46	989.055	1793.11	1599.04	2939.18	1300.81	1786.71	1636.74	1192.68	1499.72	1082.46	459.058	1263.11	1069.05	2409.18	770.817	2.84139	2.60289	1.89671	2.38499	1.72143	0.730037	2.00872	1.7001	3.83131	1.22583	1.08233	1.00956	0.741282	0.906528	0.721883	0.390609	0.845886	0.683432	1.55713	0.526247	0.579706	0.558673	0.616529	0.556919	0.566841	0.589336
876.344	531.009	1162.83	632.828	2318.03	2168.28	1725.1	2028.97	1612.17	987.983	1791.8	1598.82	2942.7	1300.96	1788.04	1638.28	1195.1	1498.97	1082.17	457.986	1261.8	1068.82	2412.7	770.964	2.8435	2.60535	1.90056	2.38381	1.72097	0.728332	2.00663	1.69974	3.8369	1.22606	1.08444	1.01202	0.745133	0.905348	0.721427	0.388905	0.843797	0.683079	1.56272	0.526481	0.580838	0.560034	0.619732	0.556194	0.566482	0.586764
881.351	530.76	1162.47	632.472	2321.59	2171.8	1727.33	2034.93	1618.97	988.952	1795.09	1599.68	2947.27	1304.2	1791.6	1641.8	1197.34	1504.94	1088.97	458.955	1265.1	1069.68	2417.27	774.202	2.84916	2.61094	1.90412	2.39329	1.73178	0.729873	2.01187	1.70111	3.84417	1.23121	1.0901	1.01761	0.748688	0.914827	0.732235	0.390446	0.849038	0.684445	1.56999	0.53163	0.583872	0.563127	0.622688	0.562018	0.574969	0.589089
886.359	531.751	1161.49	631.489	2321.49	2168.74	1724.98	2033.93	1616.54	987.837	1793.78	1603.17	2943.93	1303.41	1791.49	1638.74	1194.98	1503.93	1086.54	457.84	1263.78	1073.18	2413.94	773.418	2.84899	2.60608	1.90037	2.39169	1.72792	0.7281	2.00979	1.70667	3.83887	1.22996	1.08993	1.01275	0.744941	0.913232	0.728378	0.388672	0.846954	0.690003	1.56469	0.530383	0.58378	0.560438	0.619572	0.561038	0.57194	0.586413
891.367	532.861	1163.65	633.656	2324.61	2173.94	1727.6	2033.94	1616.72	991.054	1795.71	1606.18	2952.99	1304.9	1794.61	1643.94	1197.6	1503.94	1086.72	461.057	1265.72	1076.18	2423	774.906	2.85396	2.61435	1.90454	2.39171	1.72821	0.733216	2.01286	1.71145	3.85328	1.23233	1.0949	1.02102	0.749106	0.913247	0.72866	0.393788	0.850024	0.694783	1.5791	0.53275	0.586438	0.565013	0.623036	0.561047	0.572161	0.594132
896.374	531.948	1163.43	633.435	2322.18	2170.72	1727.89	2034.64	1615.81	988	1797.37	1604.29	2951.79	1303.64	1792.19	1640.72	1197.9	1504.65	1085.81	458.003	1267.38	1074.29	2421.8	773.647	2.8501	2.60923	1.905	2.39283	1.72676	0.728359	2.0155	1.70844	3.85137	1.23033	1.09104	1.0159	0.749575	0.914369	0.727214	0.388932	0.852667	0.691774	1.57719	0.530748	0.584375	0.562181	0.623426	0.561737	0.571026	0.586804
901.382	531.356	1161.69	631.696	2327.38	2172.25	1729.62	2036.06	1617.96	990.862	1798.3	1606.26	2952.13	1305.44	1797.39	1642.25	1199.62	1506.06	1087.96	460.865	1268.3	1076.26	2422.13	775.445	2.85837	2.61166	1.90775	2.39507	1.73018	0.732911	2.01697	1.71158	3.8519	1.23319	1.09931	1.01833	0.752323	0.916613	0.730632	0.393483	0.854139	0.694912	1.57772	0.533607	0.588803	0.563527	0.625712	0.563115	0.57371	0.593671
906.39	529.13	1160.95	630.956	2323.74	2175.39	1728.12	2035.88	1614.92	989.615	1796.94	1604.18	2949.99	1305.42	1793.75	1645.4	1198.13	1505.88	1084.93	459.618	1266.94	1074.18	2419.99	775.424	2.85259	2.61666	1.90537	2.3948	1.72535	0.730928	2.01481	1.70826	3.8485	1.23315	1.09353	1.02333	0.749944	0.916336	0.725805	0.3915	0.851974	0.691598	1.57432	0.533574	0.585704	0.566294	0.623733	0.562945	0.56992	0.590679
911.397	530.556	1162.08	632.079	2325.29	2176.85	1731.53	2040.27	1614.99	992.495	1799.08	1607.07	2959.15	1306.81	1795.29	1646.85	1201.54	1510.27	1085	462.498	1269.08	1077.07	2429.15	776.81	2.85504	2.61898	1.9108	2.40178	1.72546	0.735508	2.01821	1.71286	3.86306	1.23536	1.09598	1.02565	0.755367	0.923316	0.725915	0.39608	0.855373	0.696195	1.58888	0.535778	0.58702	0.567575	0.628243	0.567233	0.570006	0.59759
916.405	530.999	1163.66	633.659	2331.06	2177.95	1733.72	2043.02	1617.23	991.921	1803.22	1605.8	2960.98	1306.84	1801.06	1647.95	1203.72	1513.03	1087.24	461.924	1273.22	1075.8	2430.98	776.84	2.86421	2.62073	1.91427	2.40616	1.72902	0.734595	2.0248	1.71084	3.86598	1.2354	1.10515	1.0274	0.75884	0.927696	0.729479	0.395167	0.861963	0.694177	1.5918	0.535825	0.591931	0.568544	0.631132	0.569924	0.572805	0.596212
921.413	530.443	1159.64	629.644	2325.26	2175.47	1728.37	2038.52	1614.33	990.892	1800.58	1606.7	2958.09	1305.68	1795.26	1645.47	1198.38	1508.53	1084.33	460.895	1270.58	1076.71	2428.09	775.685	2.85499	2.61678	1.90577	2.399	1.7244	0.732958	2.02059	1.71228	3.86138	1.23357	1.09593	1.02345	0.750338	0.920538	0.724854	0.393531	0.857761	0.695615	1.5872	0.533989	0.586991	0.566358	0.624061	0.565526	0.569173	0.593743
926.421	530.283	1160.67	630.676	2330.51	2179.16	1732.27	2041.89	1616.89	992.636	1800.33	1606.16	2957.91	1305.63	1800.51	1649.17	1202.27	1511.89	1086.9	462.639	1270.33	1076.16	2427.91	775.637	2.86334	2.62266	1.91196	2.40435	1.72849	0.735732	2.0202	1.71141	3.8611	1.23349	1.10428	1.02933	0.756533	0.925889	0.728941	0.396304	0.857364	0.694747	1.58692	0.533912	0.591464	0.569612	0.629213	0.568814	0.572382	0.597928
931.428	531.295	1161.1	631.104	2329.45	2176.66	1731.39	2042.15	1618.59	991.425	1799.31	1606.25	2958.56	1307.08	1799.45	1646.66	1201.39	1512.15	1088.6	461.428	1269.32	1076.25	2428.56	777.085	2.86165	2.61868	1.91056	2.40476	1.73119	0.733806	2.01859	1.71155	3.86212	1.23579	1.10259	1.02535	0.755135	0.926301	0.731643	0.394378	0.855753	0.69489	1.58795	0.536215	0.590559	0.567407	0.62805	0.569067	0.574504	0.595022
936.436	531.087	1161.81	631.81	2331.38	2182.7	1733.89	2041.65	1620.25	992.64	1801.79	1607.23	2963.4	1307.72	1801.38	1652.71	1203.89	1511.65	1090.26	462.643	1271.79	1077.23	2433.4	777.727	2.86472	2.62829	1.91454	2.40397	1.73383	0.735738	2.02252	1.71312	3.86982	1.23681	1.10566	1.03496	0.759111	0.925509	0.734281	0.396311	0.859687	0.696455	1.59564	0.537236	0.592204	0.572726	0.631357	0.568581	0.576576	0.597938
941.444	530.708	1161.71	631.714	2338.2	2186.56	1738.98	2044.35	1622.49	993.168	1803.73	1612.44	2972.62	1309.48	1808.2	1656.56	1208.98	1514.36	1092.5	463.171	1273.73	1082.44	2442.63	779.488	2.87557	2.63442	1.92264	2.40827	1.73739	0.736578	2.0256	1.7214	3.88449	1.23961	1.11651	1.04109	0.76721	0.929809	0.737842	0.39715	0.862771	0.70474	1.61031	0.540037	0.598012	0.576121	0.638093	0.571222	0.579372	0.599204
946.451	531.281	1161.03	631.032	2339.49	2186.98	1740.34	2046.86	1620.07	995.86	1806.25	1611.66	2971.48	1311.04	1809.49	1656.98	1210.34	1516.86	1090.07	465.863	1276.25	1081.66	2441.48	781.041	2.87762	2.63509	1.9248	2.41226	1.73353	0.740859	2.02962	1.72016	3.88267	1.24208	1.11856	1.04176	0.769373	0.933796	0.733984	0.401431	0.866783	0.703493	1.60849	0.542506	0.599112	0.576488	0.639892	0.573672	0.576342	0.605663
951.459	531.082	1161.05	631.056	2337.85	2186.88	1737.91	2044.09	1622.47	996.847	1807.55	1612.9	2970.01	1309.58	1807.85	1656.88	1207.91	1514.09	1092.47	466.85	1277.55	1082.91	2440.01	779.578	2.87501	2.63493	1.92094	2.40784	1.73735	0.742429	2.03168	1.72214	3.88033	1.23976	1.11595	1.0416	0.765508	0.929383	0.737801	0.403001	0.868846	0.705475	1.60615	0.54018	0.597716	0.576399	0.636678	0.57096	0.579339	0.608032
956.467	532	1161.8	631.799	2339.62	2187.24	1740.26	2046.24	1623.94	996.311	1806.56	1612.7	2972.28	1311.46	1809.62	1657.24	1210.26	1516.24	1093.94	466.314	1276.56	1082.71	2442.29	781.463	2.87783	2.63549	1.92467	2.41127	1.73969	0.741576	2.03011	1.72182	3.88395	1.24276	1.11877	1.04217	0.769244	0.932809	0.740145	0.402149	0.867276	0.70516	1.60978	0.543177	0.599226	0.576714	0.639785	0.573065	0.58118	0.606746
961.474	532.074	1161.41	631.414	2340.4	2190.2	1740.23	2046.28	1622.96	995.054	1809.86	1614.57	2970.53	1313.03	1810.4	1660.2	1210.23	1516.29	1092.97	465.057	1279.87	1084.57	2440.54	783.036	2.87907	2.64021	1.92463	2.41134	1.73814	0.739577	2.03536	1.72479	3.88117	1.24526	1.12001	1.04688	0.769196	0.932879	0.738591	0.40015	0.872527	0.708124	1.60699	0.545679	0.599889	0.579323	0.639745	0.573108	0.57996	0.60373
966.482	530.944	1157.85	627.857	2339.52	2187.38	1738.28	2047.47	1626.26	994.135	1807.96	1613.43	2968.27	1311.43	1809.53	1657.39	1208.28	1517.48	1096.26	464.138	1277.97	1083.43	2438.27	781.433	2.87768	2.63573	1.92152	2.41323	1.74338	0.738116	2.03234	1.72297	3.87756	1.24271	1.11862	1.0424	0.766092	0.93477	0.743836	0.398688	0.86951	0.706308	1.60339	0.54313	0.599142	0.576845	0.637163	0.57427	0.584078	0.601525
971.49	531.737	1161.72	631.727	2345.58	2193.2	1741.64	2048.16	1628.64	995.324	1812.1	1618.41	2972.86	1315.88	1815.59	1663.2	1211.64	1518.17	1098.64	465.327	1282.1	1088.41	2442.86	785.887	2.88731	2.64498	1.92687	2.41433	1.74716	0.740007	2.03892	1.7309	3.88487	1.24979	1.12825	1.05165	0.771438	0.935872	0.747619	0.400579	0.876083	0.714234	1.61069	0.550213	0.604305	0.581962	0.64161	0.574947	0.587049	0.604377
976.497	531.423	1157.15	627.154	2344.58	2192.95	1742	2049.5	1626.61	997.2	1809.07	1616.02	2975.09	1312.61	1814.58	1662.95	1212	1519.5	1096.61	467.203	1279.08	1086.02	2445.09	782.616	2.88572	2.64458	1.92744	2.41645	1.74393	0.74299	2.0341	1.72709	3.88841	1.24459	1.12666	1.05126	0.772006	0.937993	0.744384	0.403562	0.871271	0.710428	1.61423	0.545011	0.60345	0.581744	0.642082	0.57625	0.584509	0.608879
981.505	530.935	1158.74	628.746	2345.82	2191.68	1741.8	2047.48	1626.77	995.958	1809.68	1614.84	2973.04	1313.99	1815.82	1661.68	1211.81	1517.48	1096.78	465.961	1279.69	1084.84	2443.05	783.994	2.88769	2.64256	1.92713	2.41324	1.74419	0.741015	2.03508	1.72522	3.88516	1.24678	1.12863	1.04923	0.771696	0.934784	0.744648	0.401587	0.872246	0.708554	1.61098	0.547202	0.604507	0.580622	0.641825	0.574278	0.584716	0.605899
986.513	531.214	1160.25	630.253	2341.13	2192.18	1742.84	2049.37	1625.32	996.476	1809.05	1613.77	2978.65	1313.59	1811.13	1662.19	1212.84	1519.38	1095.32	466.479	1279.05	1083.77	2448.65	783.589	2.88023	2.64336	1.92877	2.41625	1.74188	0.741839	2.03406	1.72351	3.89408	1.24614	1.12117	1.05003	0.773345	0.937793	0.742336	0.402411	0.871231	0.706849	1.6199	0.546558	0.600512	0.581068	0.643196	0.576127	0.582901	0.607141
991.52	531.38	1159.88	629.888	2346.32	2194.42	1743.35	2051.5	1626.58	998.659	1811.74	1617.34	2980.78	1315.04	1816.33	1664.42	1213.35	1521.51	1096.58	468.662	1281.74	1087.34	2450.79	785.043	2.88849	2.64692	1.92959	2.41964	1.74388	0.74531	2.03834	1.7292	3.89747	1.24845	1.12943	1.05359	0.774156	0.941178	0.744335	0.405883	0.875507	0.712532	1.62329	0.548871	0.604936	0.583035	0.643871	0.578207	0.58447	0.612379
996.528	530.636	1160.13	630.13	2349.65	2196.64	1744.95	2050.59	1628.53	998.193	1813.28	1617.4	2984.47	1315.88	1819.65	1666.64	1214.95	1520.59	1098.54	468.196	1283.28	1087.41	2454.47	785.884	2.89378	2.65045	1.93213	2.41818	1.74699	0.744569	2.04079	1.72929	3.90333	1.24979	1.13472	1.05712	0.776699	0.93972	0.747447	0.405141	0.877961	0.712631	1.62915	0.550208	0.607769	0.584989	0.645986	0.577311	0.586914	0.611261
1001.54	531.74	1159.77	629.772	2349.8	2198.28	1747.47	2053.32	1626.69	999.19	1810.3	1620.24	2981.85	1317.06	1819.8	1668.28	1217.48	1523.33	1096.69	469.193	1280.31	1090.24	2451.85	787.058	2.89402	2.65306	1.93615	2.42253	1.74406	0.746155	2.03606	1.7338	3.89917	1.25165	1.13496	1.05973	0.780716	0.944073	0.744515	0.406727	0.873227	0.717141	1.62499	0.552075	0.607894	0.586433	0.649327	0.579985	0.584611	0.613653
1006.54	530.191	1158.58	628.58	2346.17	2195.16	1743.15	2047.34	1625.02	996.96	1812.07	1615.56	2981.76	1314.23	1816.17	1665.16	1213.16	1517.35	1095.03	466.963	1282.08	1085.56	2451.77	784.229	2.88824	2.6481	1.92927	2.41303	1.74141	0.742608	2.03888	1.72636	3.89903	1.24715	1.12918	1.05477	0.773843	0.934564	0.741869	0.403181	0.876045	0.709694	1.62485	0.547576	0.604802	0.583689	0.64361	0.574143	0.582533	0.608303
1011.55	530.463	1161.54	631.544	2350.11	2199.02	1746.56	2054.96	1626.27	999	1816.95	1620.19	2987.91	1317.78	1820.11	1669.02	1216.57	1524.96	1096.27	469.003	1286.96	1090.19	2457.91	787.779	2.89451	2.65423	1.9347	2.42514	1.7434	0.745853	2.04664	1.73373	3.9088	1.2528	1.13545	1.0609	0.779269	0.946678	0.74385	0.406425	0.883802	0.717062	1.63463	0.553222	0.608158	0.587084	0.648123	0.581585	0.584089	0.613197
1016.56	532.393	1159.3	629.303	2354.68	2203.05	1746.02	2058.7	1629.74	999.599	1816.7	1621.33	2991.6	1320.53	1824.68	1673.06	1216.03	1528.7	1099.74	469.602	1286.7	1091.33	2461.6	790.534	2.90178	2.66065	1.93384	2.43108	1.74892	0.746805	2.04624	1.73554	3.91467	1.25718	1.14272	1.06732	0.77841	0.952621	0.74937	0.407377	0.883403	0.718873	1.64049	0.557603	0.612054	0.590635	0.647409	0.585236	0.588424	0.614635
1021.57	532.324	1162.19	632.197	2354.19	2199.32	1745.14	2058.84	1630.13	1001.41	1816.27	1621.81	2988.06	1316.83	1824.2	1669.32	1215.14	1528.84	1100.13	471.412	1286.28	1091.81	2458.07	786.835	2.90101	2.65471	1.93243	2.43131	1.74953	0.749684	2.04555	1.7363	3.90905	1.2513	1.14195	1.06138	0.777003	0.952845	0.749989	0.410256	0.882721	0.719639	1.63487	0.55172	0.611639	0.587349	0.646238	0.585374	0.588909	0.618978
1026.57	531.256	1161.39	631.393	2353.09	2202.36	1750.11	2056.11	1631.49	1000.39	1823.28	1622.33	2990.97	1319.19	1823.09	1672.37	1220.11	1526.12	1101.49	470.389	1293.28	1092.33	2460.97	789.198	2.89925	2.65955	1.94033	2.42697	1.75169	0.748057	2.05669	1.73712	3.91367	1.25506	1.14019	1.06622	0.784902	0.948513	0.752147	0.408629	0.893858	0.720458	1.63949	0.555478	0.610697	0.590028	0.652808	0.582713	0.590604	0.616523
1031.58	532.108	1161.58	631.581	2352.91	2203.53	1750.89	2059.11	1633.37	1001.65	1817.96	1624.42	2991.92	1319.68	1822.92	1673.54	1220.9	1529.12	1103.37	471.651	1287.96	1094.42	2461.92	789.679	2.89897	2.66141	1.94158	2.43174	1.75469	0.750064	2.04824	1.74045	3.91518	1.25582	1.13991	1.06808	0.786152	0.953284	0.75514	0.410636	0.885407	0.723789	1.641	0.556243	0.61055	0.591056	0.653847	0.585644	0.592954	0.619551
1036.59	531.603	1157.57	627.574	2354.65	2200.11	1748.65	2054.39	1628.77	999.797	1815.03	1622.14	2987.23	1317.29	1824.66	1670.11	1218.66	1524.39	1098.77	469.8	1285.03	1092.14	2457.23	787.295	2.90174	2.65596	1.93802	2.42423	1.74736	0.74712	2.04358	1.73682	3.90772	1.25203	1.14268	1.06263	0.782591	0.94577	0.747818	0.407692	0.880747	0.720161	1.63354	0.552452	0.612031	0.588041	0.650886	0.581027	0.587205	0.61511
1041.6	531.346	1158.63	628.636	2352.21	2202.36	1751.97	2057.63	1631.8	1001.7	1816.24	1622.63	2992.03	1318.81	1822.22	1672.36	1221.97	1527.64	1101.8	471.706	1286.24	1092.64	2462.03	788.816	2.89786	2.65955	1.94329	2.42939	1.75219	0.750151	2.04551	1.73761	3.91535	1.25445	1.1388	1.06622	0.787865	0.950929	0.752646	0.410723	0.882672	0.720947	1.64117	0.554871	0.609952	0.590026	0.655272	0.584197	0.590996	0.619683
1046.61	531.648	1157.59	627.592	2353.72	2205.07	1752.49	2058.6	1630.51	1001.72	1817.12	1622.33	2995.76	1319.82	1823.72	1675.07	1222.49	1528.6	1100.51	471.725	1287.12	1092.34	2465.76	789.825	2.90025	2.66385	1.94412	2.43092	1.75014	0.750181	2.0469	1.73714	3.92128	1.25605	1.14119	1.07052	0.788687	0.952463	0.75059	0.410754	0.884065	0.720473	1.6471	0.556475	0.611235	0.592405	0.655956	0.585139	0.589381	0.619729
1051.61	532.675	1156.65	626.653	2358.17	2206.72	1750.16	2058.89	1632.71	999.88	1820.16	1622.83	2995.05	1320.14	1828.17	1676.73	1220.17	1528.9	1102.71	469.883	1290.17	1092.83	2465.06	790.139	2.90732	2.66649	1.94043	2.43139	1.75363	0.747252	2.05175	1.73792	3.92016	1.25655	1.14826	1.07316	0.784996	0.952934	0.754087	0.407824	0.888912	0.721257	1.64598	0.556975	0.615023	0.593866	0.652886	0.585429	0.592127	0.615309
1056.62	532.917	1158.66	628.666	2358.91	2204.16	1750.54	2063.6	1635.26	999.733	1822.01	1624.04	2997.76	1321.31	1828.91	1674.17	1220.54	1533.6	1105.26	469.736	1292.01	1094.05	2467.76	791.312	2.90851	2.66242	1.94102	2.43887	1.75769	0.747018	2.05467	1.73985	3.92446	1.25842	1.14945	1.06909	0.785589	0.960413	0.758148	0.407591	0.891838	0.723191	1.65028	0.55884	0.615657	0.591613	0.653379	0.590023	0.595317	0.614956
1061.63	531.31	1158.39	628.394	2356.6	2206.53	1751.35	2062.38	1630.19	1002.27	1822.46	1622.71	2996.22	1319.36	1826.6	1676.53	1221.35	1532.38	1100.19	472.272	1292.46	1092.72	2466.22	789.364	2.90484	2.66618	1.94231	2.43693	1.74963	0.751051	2.05539	1.73774	3.92202	1.25532	1.14578	1.07285	0.786877	0.958473	0.750081	0.411624	0.892558	0.721075	1.64784	0.555742	0.61369	0.593694	0.654451	0.588831	0.588982	0.621041
1066.63	531.824	1160.16	630.168	2357.25	2203.72	1753.28	2060.93	1633.05	1002.05	1825.35	1623.26	2999.34	1320.78	1827.26	1673.72	1223.29	1530.94	1103.05	472.051	1295.35	1093.26	2469.34	790.779	2.90587	2.66171	1.94538	2.43464	1.75417	0.7507	2.05999	1.7386	3.92697	1.25757	1.14681	1.06838	0.789953	0.956175	0.754627	0.411272	0.897158	0.721939	1.6528	0.557993	0.614246	0.591221	0.657009	0.58742	0.592552	0.620511
1071.64	532.25	1161.48	631.483	2360.49	2209.16	1754.17	2064.55	1635.92	1003.82	1826.13	1621.85	3002.3	1322.62	1830.49	1679.16	1224.18	1534.56	1105.92	473.819	1296.13	1091.85	2472.3	792.625	2.91101	2.67036	1.9468	2.4404	1.75874	0.753511	2.06123	1.73636	3.93169	1.26051	1.15195	1.07703	0.791368	0.961937	0.759198	0.414084	0.8984	0.719697	1.65751	0.560928	0.616998	0.59601	0.658186	0.590959	0.596141	0.624753
1076.65	530.952	1161.46	631.46	2362.14	2208.68	1754.78	2064.91	1635.08	1001.54	1826.54	1622.76	3002.93	1322.91	1832.14	1678.68	1224.78	1534.91	1105.09	471.545	1296.54	1092.77	2472.94	792.914	2.91364	2.6696	1.94776	2.44096	1.75741	0.749895	2.06189	1.73782	3.9327	1.26097	1.15458	1.07627	0.792333	0.962499	0.757867	0.410467	0.899052	0.721157	1.65852	0.561388	0.618404	0.595585	0.658989	0.591305	0.595096	0.619297
1081.66	532.395	1162.44	632.442	2362.51	2207.37	1754.26	2066.08	1634.88	1002.21	1828.16	1625.29	3002.99	1321.62	1832.51	1677.38	1224.26	1536.08	1104.88	472.213	1298.17	1095.3	2473	791.624	2.91423	2.66752	1.94694	2.44282	1.75708	0.750957	2.06447	1.74184	3.93279	1.25891	1.15517	1.07419	0.79151	0.96436	0.757539	0.41153	0.901634	0.725177	1.65861	0.559336	0.618721	0.594436	0.658304	0.592448	0.594838	0.620899
1086.67	531.79	1161.01	631.018	2361.2	2208.67	1755.34	2063.16	1636.65	1002.14	1826.57	1624.52	3002.16	1322.44	1831.2	1678.68	1225.34	1533.16	1106.66	472.139	1296.57	1094.52	2472.17	792.441	2.91215	2.66959	1.94866	2.43818	1.75991	0.75084	2.06193	1.74061	3.93147	1.26021	1.15309	1.07626	0.793227	0.959716	0.760362	0.411412	0.899099	0.723949	1.65729	0.560636	0.617605	0.59558	0.659732	0.589595	0.597055	0.620722
1091.67	531.964	1164.26	634.266	2363.05	2212.56	1756.14	2066.55	1635.64	1003.96	1829.17	1624.76	3005.03	1323.16	1833.05	1682.57	1226.15	1536.55	1105.64	473.962	1299.17	1094.76	2475.03	793.167	2.91509	2.67577	1.94993	2.44357	1.7583	0.753739	2.06607	1.74099	3.93602	1.26137	1.15603	1.08244	0.794504	0.965108	0.75875	0.414311	0.903234	0.724323	1.66184	0.56179	0.619182	0.599003	0.660794	0.592907	0.595789	0.625096
1096.68	531.666	1164.73	634.737	2364.45	2210.47	1759.36	2070.08	1639.98	1004.71	1829.66	1625.76	3010.81	1324.29	1834.45	1680.47	1229.36	1540.09	1109.98	474.717	1299.66	1095.76	2480.82	794.29	2.91732	2.67244	1.95505	2.44919	1.7652	0.754939	2.06685	1.74258	3.94523	1.26315	1.15826	1.07911	0.79962	0.970726	0.765653	0.415512	0.904012	0.725913	1.67105	0.563576	0.620374	0.597158	0.665049	0.596359	0.60121	0.626907
1101.69	530.196	1162.64	632.643	2361.91	2210.33	1756.44	2066.38	1637.71	1005.61	1828.2	1625.07	3007.16	1321.82	1831.92	1680.33	1226.44	1536.39	1107.72	475.617	1298.21	1095.08	2477.16	791.82	2.91328	2.67222	1.9504	2.4433	1.76159	0.756371	2.06453	1.74149	3.93941	1.25923	1.15422	1.07889	0.794968	0.964844	0.762046	0.416943	0.901698	0.724827	1.66523	0.559648	0.618214	0.597035	0.66118	0.592745	0.598377	0.629067
1106.7	532.533	1162.68	632.68	2364.42	2209.78	1759.22	2065.54	1636.37	1004.03	1828.19	1626.05	3005.77	1321.18	1834.42	1679.78	1229.22	1535.55	1106.37	474.037	1298.2	1096.06	2475.77	791.183	2.91727	2.67135	1.95483	2.44197	1.75946	0.753858	2.06452	1.74305	3.93721	1.25821	1.15821	1.07802	0.799397	0.963506	0.759912	0.41443	0.901682	0.726387	1.66303	0.558635	0.620347	0.596554	0.664864	0.591924	0.596702	0.625276
1111.7	531.347	1161.64	631.641	2363.22	2211.03	1758.65	2066.5	1638	1003.32	1829.86	1625.16	3010.41	1322.85	1833.22	1681.04	1228.66	1536.5	1108	473.324	1299.87	1095.16	2480.42	792.853	2.91536	2.67334	1.95392	2.44348	1.76205	0.752724	2.06717	1.74163	3.94459	1.26087	1.1563	1.08001	0.798493	0.965023	0.762499	0.413297	0.904336	0.724962	1.67041	0.561291	0.619327	0.597656	0.664111	0.592856	0.598733	0.623565
1116.71	532.006	1162.54	632.539	2364.18	2212.78	1761.88	2068.47	1638.99	1005.22	1829.53	1627.53	3007.72	1322.4	1834.18	1682.78	1231.88	1538.47	1108.99	475.221	1299.53	1097.53	2477.73	792.406	2.91689	2.67612	1.95905	2.44662	1.76362	0.755741	2.06663	1.74539	3.94031	1.26016	1.15783	1.08279	0.803624	0.968164	0.764077	0.416313	0.903797	0.728731	1.66613	0.56058	0.620146	0.599193	0.66838	0.594785	0.599972	0.628117
1121.72	531.739	1162.2	632.198	2363.47	2215.43	1759.3	2068.21	1639.72	1002.87	1833.1	1627.39	3005.93	1321.75	1833.47	1685.43	1229.31	1538.22	1109.72	472.872	1303.1	1097.4	2475.94	791.754	2.91576	2.68033	1.95496	2.44622	1.76478	0.752005	2.07232	1.74518	3.93747	1.25912	1.1567	1.087	0.799526	0.967755	0.765235	0.412578	0.909482	0.728521	1.66329	0.559543	0.619539	0.601524	0.664971	0.594534	0.600881	0.622481
1126.73	529.721	1161.24	631.246	2364.68	2215.72	1757.88	2065.85	1639.83	1004.61	1831.71	1626.11	3008.84	1323.35	1834.69	1685.73	1227.88	1535.85	1109.83	474.614	1301.71	1096.11	2478.85	793.357	2.91769	2.6808	1.95269	2.44245	1.76496	0.754776	2.0701	1.74314	3.94209	1.26167	1.15863	1.08747	0.797257	0.963993	0.76541	0.415348	0.90727	0.726476	1.66791	0.562092	0.620576	0.601785	0.663084	0.592223	0.601018	0.62666
1131.73	532.087	1162.71	632.711	2369.49	2217.88	1760.79	2067.82	1640.48	1005.08	1836.13	1629.39	3010.05	1324.21	1839.49	1687.88	1230.79	1537.83	1110.48	475.081	1306.14	1099.39	2480.06	794.217	2.92533	2.68423	1.95732	2.44559	1.766	0.755518	2.07714	1.74836	3.94402	1.26304	1.16627	1.0909	0.801893	0.967132	0.76645	0.416091	0.914304	0.731695	1.66984	0.56346	0.624667	0.603684	0.666939	0.594151	0.601835	0.627781
1136.74	533.048	1162.74	632.745	2371.75	2217.4	1764.91	2069.83	1643.83	1004.75	1835.9	1631.32	3017.59	1324.6	1841.75	1687.4	1234.91	1539.84	1113.84	474.758	1305.9	1101.32	2487.6	794.602	2.92892	2.68346	1.96387	2.44879	1.77133	0.755005	2.07676	1.75142	3.95601	1.26365	1.16986	1.09013	0.80844	0.97033	0.77178	0.415577	0.913929	0.734758	1.68183	0.564072	0.62659	0.60326	0.672385	0.596116	0.606021	0.627006
1141.75	531.452	1154.61	624.613	2368.51	2215.14	1760.77	2069.76	1638.4	1004.65	1833.03	1629.43	3018.9	1323.99	1838.51	1685.15	1230.77	1539.76	1108.4	474.656	1303.03	1099.44	2488.9	793.998	2.92377	2.67988	1.95729	2.44867	1.76268	0.754842	2.0722	1.74843	3.95808	1.26269	1.16471	1.08655	0.801858	0.970211	0.763136	0.415415	0.909371	0.731762	1.6839	0.563112	0.623833	0.601275	0.66691	0.596043	0.599233	0.626761
1146.76	530.463	1160.22	630.224	2370.24	2214.69	1762.04	2069.29	1642.32	1004.65	1835.58	1630.06	3014.36	1323.81	1840.25	1684.69	1232.04	1539.29	1112.32	474.65	1305.58	1100.06	2484.36	793.814	2.92653	2.67916	1.95931	2.44792	1.76891	0.754833	2.07626	1.74942	3.95086	1.2624	1.16747	1.08583	0.803877	0.96946	0.769368	0.415405	0.913423	0.732761	1.67668	0.562819	0.625311	0.600877	0.66859	0.595581	0.604127	0.626747
1151.77	530.267	1160.25	630.25	2373.7	2223.76	1767.83	2072.62	1639.96	1005.14	1835.77	1634.46	3022.36	1325.77	1843.7	1693.76	1237.83	1542.62	1109.96	475.143	1305.77	1104.46	2492.36	795.768	2.93203	2.69358	1.96851	2.45322	1.76516	0.755617	2.07655	1.75642	3.96358	1.2655	1.17297	1.10025	0.813085	0.974757	0.765616	0.416189	0.91372	0.739753	1.6894	0.565926	0.628254	0.608858	0.676248	0.598836	0.601181	0.62793
1156.77	530.296	1156.04	626.04	2370.72	2219.09	1764.01	2068.64	1637.59	1004.18	1834.92	1629.58	3015.33	1324.95	1840.72	1689.1	1234.02	1538.64	1107.59	474.179	1304.92	1099.58	2485.33	794.952	2.92729	2.68616	1.96245	2.44689	1.7614	0.754084	2.0752	1.74866	3.95241	1.26421	1.16823	1.09283	0.807018	0.96843	0.761854	0.414656	0.91237	0.731998	1.67823	0.564629	0.625715	0.60475	0.671202	0.594948	0.598226	0.625617
1161.78	530.932	1163.02	633.02	2373.79	2220.29	1765.81	2072.48	1640.11	1005.93	1836.95	1633.54	3020.08	1326.4	1843.79	1690.29	1235.81	1542.48	1110.11	475.934	1306.96	1103.54	2490.08	796.408	2.93217	2.68806	1.9653	2.453	1.7654	0.756875	2.07845	1.75496	3.95996	1.26652	1.17311	1.09473	0.80987	0.974541	0.765852	0.417447	0.915611	0.738295	1.68579	0.566944	0.628331	0.6058	0.673574	0.598703	0.601366	0.629828
1166.79	530.176	1158.36	628.361	2373.31	2222.46	1766.76	2070.87	1640.79	1006.68	1838.82	1630.44	3018.75	1325.58	1843.31	1692.47	1236.76	1540.87	1110.8	476.679	1308.82	1100.44	2488.75	795.583	2.9314	2.69152	1.96681	2.45044	1.76649	0.75806	2.0814	1.75003	3.95784	1.26521	1.17234	1.09819	0.811383	0.971978	0.766946	0.418632	0.918571	0.733364	1.68366	0.565632	0.62792	0.607715	0.674833	0.597128	0.602225	0.631615
1171.8	531.079	1157	627.004	2374.77	2222.3	1768.52	2072.29	1640.84	1004.59	1839.54	1632.34	3017.49	1326.52	1844.77	1692.3	1238.52	1542.29	1110.84	474.59	1309.54	1102.35	2487.49	796.525	2.93373	2.69126	1.96961	2.4527	1.76656	0.754738	2.08256	1.75305	3.95584	1.26671	1.17467	1.09793	0.814184	0.974237	0.767017	0.41531	0.919722	0.73639	1.68166	0.56713	0.629165	0.607572	0.677162	0.598516	0.602281	0.626603
1176.8	530.722	1159.24	629.247	2371.69	2225.83	1768.31	2073.53	1639.57	1004.62	1838.41	1632.63	3019.07	1326.9	1841.69	1695.84	1238.31	1543.53	1109.57	474.625	1308.41	1102.63	2489.07	796.903	2.92883	2.69688	1.96927	2.45466	1.76454	0.754793	2.08076	1.7535	3.95835	1.26731	1.16977	1.10355	0.813845	0.976201	0.764993	0.415365	0.917927	0.73684	1.68417	0.567731	0.626539	0.610681	0.67688	0.599723	0.600691	0.626687
1181.81	531.321	1159.15	629.154	2376.42	2225.44	1768.85	2074.65	1643.74	1006.52	1841.78	1633.18	3021.14	1328.46	1846.42	1695.45	1238.85	1544.66	1113.75	476.522	1311.78	1103.18	2491.14	798.462	2.93635	2.69626	1.97014	2.45646	1.77118	0.75781	2.08612	1.75438	3.96164	1.26979	1.17729	1.10293	0.814709	0.977997	0.771639	0.418382	0.923281	0.737715	1.68746	0.570211	0.630569	0.61034	0.677598	0.600826	0.60591	0.631238
1186.82	531.296	1162.73	632.735	2376.46	2224.35	1768.54	2076.68	1639.92	1005.71	1842.98	1634.24	3023.51	1328.65	1846.46	1694.36	1238.55	1546.69	1109.93	475.712	1312.98	1104.25	2493.52	798.652	2.93641	2.69452	1.96965	2.45969	1.76511	0.756522	2.08803	1.75607	3.96542	1.27009	1.17735	1.10119	0.814221	0.981227	0.765566	0.417094	0.925194	0.73941	1.69124	0.570513	0.630603	0.609379	0.677192	0.60281	0.601141	0.629295
1191.83	530.471	1159.24	629.239	2373.87	2223.39	1766.82	2072.98	1641.33	1004.67	1840.99	1632.59	3021.94	1327.26	1843.87	1693.39	1236.82	1542.98	1111.33	474.673	1311	1102.59	2491.94	797.263	2.93229	2.69298	1.96691	2.4538	1.76734	0.754869	2.08487	1.75345	3.96292	1.26788	1.17323	1.09965	0.81148	0.975336	0.767792	0.415442	0.922036	0.736784	1.68874	0.568304	0.628396	0.608528	0.674913	0.599191	0.602889	0.626802
1196.84	531.32	1159.39	629.393	2380.49	2225.35	1767.44	2077.26	1642.89	1005.64	1842.61	1634.32	3027.08	1327.87	1850.49	1695.35	1237.45	1547.27	1112.89	475.648	1312.61	1104.32	2497.08	797.872	2.94282	2.69611	1.96791	2.46061	1.76982	0.75642	2.08744	1.75619	3.97109	1.26885	1.18376	1.10278	0.812476	0.982148	0.770279	0.416992	0.924604	0.739531	1.69692	0.569272	0.634034	0.610257	0.675741	0.603376	0.604842	0.629141
1201.84	530.686	1156.95	626.955	2378.57	2227.74	1765.76	2073.54	1640.89	1004.32	1840.72	1632.29	3025.97	1327.5	1848.57	1697.75	1235.76	1543.54	1110.9	474.327	1310.72	1102.29	2495.98	797.507	2.93977	2.69992	1.96522	2.45468	1.76665	0.754319	2.08443	1.75296	3.96934	1.26827	1.18071	1.10659	0.809793	0.976219	0.767108	0.414892	0.921599	0.736298	1.69516	0.568692	0.632398	0.612364	0.67351	0.599734	0.602352	0.625972
1206.85	529.835	1158.35	628.358	2377.25	2223.84	1768.17	2076.04	1641.17	1007.41	1839.74	1632.84	3026.89	1326.49	1847.26	1693.85	1238.17	1546.04	1111.18	477.409	1309.75	1102.84	2496.89	796.497	2.93768	2.69371	1.96905	2.45866	1.7671	0.759221	2.08288	1.75384	3.97078	1.26666	1.17862	1.10038	0.813623	0.980195	0.76755	0.419793	0.92005	0.737177	1.69661	0.567086	0.63128	0.60893	0.676695	0.602176	0.602699	0.633367
1211.86	529.76	1156.76	626.763	2377.84	2225.6	1768.78	2076.73	1642.95	1006.57	1841.07	1632.23	3025.06	1326.51	1847.85	1695.6	1238.79	1546.73	1112.96	476.572	1311.07	1102.23	2495.06	796.51	2.93862	2.6965	1.97003	2.45975	1.76993	0.757889	2.08499	1.75287	3.96788	1.26668	1.17956	1.10317	0.814602	0.981294	0.770383	0.418462	0.922159	0.736206	1.6937	0.567106	0.631784	0.610473	0.67751	0.602851	0.604923	0.631358
1216.87	530.279	1157.75	627.755	2377.79	2227.59	1770.13	2075.77	1641.43	1007.15	1840.2	1632.09	3024.39	1327.68	1847.79	1697.6	1240.14	1545.77	1111.44	477.156	1310.2	1102.09	2494.39	797.679	2.93853	2.69968	1.97218	2.45823	1.76751	0.758818	2.08361	1.75264	3.96681	1.26854	1.17947	1.10635	0.816754	0.97977	0.767967	0.419391	0.920775	0.73598	1.69263	0.568966	0.631739	0.612231	0.679299	0.601915	0.603026	0.63276
1221.87	529.843	1157.78	627.788	2378.32	2227.05	1771.38	2077.73	1642.21	1007.11	1838.35	1634.14	3027.16	1326.97	1848.32	1697.06	1241.39	1547.73	1112.22	477.11	1308.35	1104.14	2497.16	796.975	2.93937	2.69882	1.97417	2.46135	1.76875	0.758745	2.08067	1.75591	3.97122	1.26742	1.18031	1.10549	0.818742	0.982887	0.769204	0.419317	0.917831	0.739243	1.69704	0.567846	0.632185	0.611756	0.680953	0.60383	0.603998	0.632649
1226.88	531.052	1156.84	626.839	2382.02	2228.55	1773.06	2079.67	1645.78	1008.96	1843.78	1635.68	3030.18	1327.69	1852.02	1698.55	1243.07	1549.67	1115.79	478.965	1313.78	1105.69	2500.19	797.694	2.94526	2.7012	1.97684	2.46444	1.77443	0.761695	2.08929	1.75836	3.97603	1.26857	1.1862	1.10787	0.821409	0.985975	0.774883	0.422267	0.92646	0.7417	1.70185	0.568989	0.63534	0.613074	0.683171	0.605727	0.608457	0.6371
1231.89	529.902	1157.49	627.489	2379.21	2223.09	1769.79	2076.74	1646.27	1007.59	1841.12	1634.65	3026.25	1327.04	1849.22	1693.09	1239.79	1546.75	1116.27	477.59	1311.12	1104.66	2496.25	797.046	2.9408	2.69251	1.97163	2.45978	1.7752	0.759508	2.08507	1.75673	3.96977	1.26754	1.18174	1.09918	0.816199	0.981317	0.775654	0.420081	0.922233	0.740067	1.69559	0.567959	0.632951	0.608266	0.678838	0.602866	0.609063	0.633801
1236.9	531.691	1155.68	625.687	2382.49	2228.01	1774.37	2082.73	1647.52	1009.26	1841.74	1633.72	3030.72	1328.64	1852.49	1698.02	1244.38	1552.74	1117.52	479.259	1311.74	1103.72	2500.73	798.643	2.94601	2.70035	1.97892	2.46931	1.77718	0.762163	2.08605	1.75524	3.97689	1.27008	1.18695	1.10702	0.823495	0.990845	0.777636	0.422735	0.923216	0.738575	1.70271	0.570499	0.635741	0.612602	0.684906	0.608719	0.610619	0.637805
1241.9	530.513	1154.05	624.057	2382.76	2226.61	1774.48	2079.53	1646.77	1007.24	1843.24	1634.83	3029.11	1328.73	1852.77	1696.62	1244.48	1549.53	1116.77	477.245	1313.24	1104.83	2499.11	798.73	2.94644	2.69812	1.97909	2.46421	1.776	0.75896	2.08844	1.757	3.97431	1.27022	1.18738	1.10479	0.823659	0.985753	0.77645	0.419532	0.925605	0.740339	1.70014	0.570637	0.635976	0.611369	0.685042	0.605591	0.609687	0.632973
1246.91	530.425	1155.27	625.269	2383.81	2234.71	1777.35	2081.67	1646.22	1010.89	1847.67	1636.19	3034.55	1330.02	1853.82	1704.71	1247.35	1551.67	1116.22	480.895	1317.67	1106.2	2504.55	800.027	2.94811	2.71099	1.98365	2.46762	1.77512	0.764764	2.09548	1.75918	3.98298	1.27228	1.18905	1.11766	0.828225	0.989156	0.775572	0.425337	0.932647	0.742516	1.7088	0.5727	0.636868	0.618491	0.68884	0.607681	0.608998	0.641731
1251.92	530.139	1156.09	626.09	2386	2232.43	1775.69	2081.05	1647.87	1010.32	1846.81	1637.89	3033.69	1328.05	1856	1702.43	1245.69	1551.06	1117.87	480.326	1316.82	1107.89	2503.69	798.051	2.95158	2.70736	1.98101	2.46663	1.77774	0.763859	2.09412	1.76187	3.9816	1.26914	1.19252	1.11404	0.825585	0.988173	0.778196	0.424432	0.93129	0.745207	1.70743	0.569557	0.638728	0.616486	0.686644	0.607078	0.611058	0.640366
1256.93	529.302	1154.85	624.852	2387.31	2229.79	1775.23	2082.78	1648.37	1009.88	1844.82	1635.59	3033.37	1328.1	1857.32	1699.79	1245.23	1552.78	1118.37	479.888	1314.82	1105.59	2503.37	798.105	2.95368	2.70316	1.98029	2.46938	1.77853	0.763163	2.09095	1.75821	3.98109	1.26922	1.19462	1.10984	0.824858	0.990916	0.778989	0.423735	0.928114	0.741546	1.70691	0.569643	0.639849	0.614162	0.68604	0.608763	0.611681	0.639315
1261.93	529.292	1154.3	624.305	2386.03	2232.28	1775.01	2079.6	1645.2	1009.84	1847.02	1637.63	3032.71	1329.17	1856.03	1702.29	1245.01	1549.6	1115.21	479.845	1317.02	1107.63	2502.71	799.175	2.95163	2.70713	1.97993	2.46432	1.77351	0.763094	2.09445	1.76146	3.98005	1.27092	1.19257	1.1138	0.824505	0.985859	0.773961	0.423667	0.931621	0.744799	1.70587	0.571345	0.638752	0.616358	0.685746	0.605656	0.607733	0.639211
1266.94	532.014	1156.53	626.537	2390.65	2234.89	1779.04	2083.25	1651.03	1011	1846.48	1640.68	3036.83	1330.87	1860.65	1704.89	1249.04	1553.26	1121.03	480.998	1316.48	1110.69	2506.83	800.869	2.95898	2.71128	1.98634	2.47013	1.78277	0.764928	2.09359	1.76632	3.98659	1.27362	1.19992	1.11795	0.830915	0.991673	0.783221	0.4255	0.930756	0.749651	1.71241	0.574039	0.642689	0.618651	0.691078	0.609228	0.615004	0.641978
1271.95	531.987	1155.16	625.159	2389.01	2232.49	1777.63	2085.81	1648.46	1008.07	1847.67	1639.9	3033.52	1329.81	1859.01	1702.5	1247.63	1555.81	1118.47	478.069	1317.67	1109.9	2503.52	799.809	2.95638	2.70747	1.9841	2.4742	1.77869	0.76027	2.09548	1.76507	3.98134	1.27193	1.19732	1.11414	0.828675	0.995737	0.779145	0.420842	0.93265	0.748403	1.70716	0.572353	0.641295	0.616545	0.689214	0.611724	0.611804	0.63495
1276.96	531.367	1152.33	622.329	2389.67	2235.92	1777.44	2081.28	1647.17	1010.14	1846.16	1640.71	3032.62	1329.24	1859.67	1705.93	1247.44	1551.29	1117.18	480.148	1316.17	1110.71	2502.62	799.239	2.95743	2.71292	1.9838	2.467	1.77664	0.763576	2.09309	1.76636	3.9799	1.27102	1.19837	1.11959	0.828373	0.988541	0.777095	0.424149	0.930255	0.749696	1.70572	0.571446	0.641858	0.619561	0.688963	0.607303	0.610194	0.639938
1281.97	529.547	1152.67	622.673	2393.11	2236.74	1777.71	2084.9	1651.09	1011.83	1847.74	1641.26	3039.52	1330.94	1863.11	1706.74	1247.72	1554.9	1121.09	481.83	1317.74	1111.27	2509.53	800.942	2.9629	2.71422	1.98423	2.47275	1.78286	0.766251	2.0956	1.76724	3.99088	1.27373	1.20384	1.12089	0.828804	0.994285	0.783316	0.426824	0.932766	0.750577	1.71671	0.574155	0.644787	0.62028	0.689321	0.610832	0.615079	0.643974
1286.97	529.494	1152.42	622.425	2389.75	2236.09	1779.26	2087.1	1650.83	1011.97	1846.94	1643.72	3039.53	1329.38	1859.76	1706.09	1249.27	1557.1	1120.83	481.969	1316.94	1113.73	2509.53	799.386	2.95756	2.71319	1.9867	2.47625	1.78245	0.766472	2.09432	1.77115	3.9909	1.27126	1.1985	1.11986	0.83127	0.997785	0.7829	0.427045	0.931489	0.754488	1.71672	0.57168	0.641929	0.619709	0.691373	0.612983	0.614752	0.644308
1291.98	529.879	1152.7	622.701	2388.41	2231.93	1779.49	2086.46	1652.17	1011.12	1849.04	1639.67	3040.29	1328.56	1858.41	1701.94	1249.49	1556.47	1122.17	481.122	1319.05	1109.67	2510.29	798.564	2.95542	2.70658	1.98705	2.47524	1.78458	0.765125	2.09767	1.7647	3.9921	1.26995	1.19636	1.11325	0.831625	0.996775	0.785032	0.425698	0.934838	0.748036	1.71793	0.570373	0.640782	0.616052	0.691668	0.612362	0.616427	0.642275
1296.99	529.938	1151.06	621.06	2386.93	2236.4	1777.08	2084.79	1651.24	1010.97	1843.66	1639.13	3036.25	1328.83	1856.93	1706.4	1247.09	1554.79	1121.24	480.976	1313.66	1109.13	2506.26	798.835	2.95306	2.71368	1.98323	2.47257	1.7831	0.764893	2.08911	1.76384	3.98568	1.27038	1.194	1.12035	0.827803	0.99411	0.783558	0.425465	0.926273	0.74718	1.71151	0.570804	0.639519	0.619979	0.688489	0.610725	0.615269	0.641925
1302	528.413	1152.46	622.466	2388.95	2233.5	1777.82	2083.58	1649.22	1010.34	1845.88	1640.78	3036.18	1330.25	1858.95	1703.5	1247.82	1553.59	1119.22	480.338	1315.89	1110.79	2506.18	800.254	2.95627	2.70906	1.9844	2.47066	1.77989	0.763879	2.09265	1.76648	3.98556	1.27264	1.19721	1.11573	0.828967	0.992198	0.780349	0.424451	0.929814	0.749812	1.71138	0.573061	0.64124	0.617426	0.689457	0.60955	0.612749	0.640394
1307	530.723	1150.85	620.852	2390.88	2237.35	1779.43	2085.1	1650.21	1009.32	1848.05	1641.47	3043	1329.65	1860.88	1707.35	1249.44	1555.11	1120.22	479.322	1318.06	1111.47	2513	799.649	2.95935	2.71519	1.98697	2.47307	1.78147	0.762263	2.09609	1.76756	3.99641	1.27168	1.20029	1.12186	0.831542	0.994614	0.781925	0.422835	0.93326	0.750898	1.72224	0.572098	0.642887	0.620817	0.691599	0.611034	0.613987	0.637957
1312.01	529.472	1153.33	623.329	2395.04	2238.6	1782.37	2086.49	1652.75	1011.6	1850.97	1641.45	3043.11	1331.73	1865.04	1708.6	1252.37	1556.49	1122.76	481.602	1320.97	1111.45	2513.11	801.738	2.96596	2.71718	1.99164	2.47527	1.78551	0.765889	2.10073	1.76753	3.99659	1.275	1.2069	1.12385	0.836213	0.996812	0.785967	0.426461	0.937896	0.750866	1.72241	0.575421	0.64643	0.621915	0.695483	0.612385	0.617161	0.643427
1317.02	530.703	1149.82	619.82	2394.55	2240.82	1782.51	2086.57	1650.83	1010.45	1848.73	1641.82	3043.86	1331.02	1864.55	1710.82	1252.52	1556.57	1120.83	480.452	1318.74	1111.82	2513.87	801.024	2.96518	2.7207	1.99187	2.4754	1.78245	0.76406	2.09718	1.76812	3.99778	1.27386	1.20612	1.12737	0.836439	0.996944	0.7829	0.424632	0.934347	0.75146	1.7236	0.574285	0.646013	0.623867	0.695671	0.612466	0.614752	0.640668
1322.03	529.358	1150.93	620.934	2389.24	2234.43	1778.63	2080.67	1652.03	1009.54	1847.82	1639.87	3037.46	1329.01	1859.25	1704.44	1248.63	1550.67	1122.03	479.548	1317.82	1109.88	2507.47	799.016	2.95675	2.71056	1.98569	2.46602	1.78436	0.762622	2.09572	1.76503	3.98761	1.27067	1.19769	1.11723	0.830257	0.987564	0.78481	0.423195	0.932885	0.748367	1.71343	0.571092	0.641494	0.618252	0.69053	0.606703	0.616252	0.638499
1327.04	529.427	1154.27	624.269	2393.03	2239.76	1782.87	2083.09	1654.85	1011.88	1848.06	1642.85	3039.99	1331.44	1863.04	1709.77	1252.88	1553.09	1124.86	481.886	1318.07	1112.86	2509.99	801.445	2.96278	2.71903	1.99244	2.46987	1.78885	0.76634	2.09611	1.76977	3.99162	1.27453	1.20372	1.1257	0.837013	0.991409	0.789305	0.426913	0.933278	0.753106	1.71745	0.574955	0.644723	0.622942	0.696149	0.609066	0.619782	0.644109
1332.04	529.814	1151.72	621.726	2393.64	2237.95	1778.65	2085.05	1654.13	1009.95	1847.48	1641.31	3040.75	1331.09	1863.65	1707.95	1248.65	1555.05	1124.14	479.952	1317.48	1111.31	2510.75	801.088	2.96375	2.71615	1.98573	2.47298	1.78771	0.763265	2.09518	1.76732	3.99283	1.27397	1.20469	1.12282	0.830297	0.994523	0.788162	0.423837	0.932344	0.750652	1.71865	0.574387	0.645242	0.621346	0.690563	0.610979	0.618884	0.639468
1337.05	528.476	1150.54	620.547	2392.55	2236.52	1780.96	2083.79	1652.8	1010.31	1851.76	1641.08	3042.7	1329.61	1862.55	1706.53	1250.96	1553.8	1122.8	480.315	1321.76	1111.08	2512.71	799.614	2.96201	2.71388	1.9894	2.47099	1.78558	0.763842	2.10199	1.76694	3.99594	1.27162	1.20295	1.12055	0.833969	0.992531	0.786033	0.424414	0.939154	0.750276	1.72176	0.572043	0.64431	0.620089	0.693617	0.609755	0.617212	0.640339
1342.06	529.189	1151.32	621.324	2394.59	2239.26	1781.91	2085.8	1656.31	1012.67	1850.54	1641.85	3045.07	1330.36	1864.59	1709.27	1251.91	1555.8	1126.32	482.67	1320.54	1111.85	2515.08	800.358	2.96524	2.71824	1.99091	2.47418	1.79117	0.767587	2.10005	1.76817	3.99971	1.2728	1.20618	1.12491	0.835481	0.995714	0.791629	0.428159	0.937217	0.751509	1.72553	0.573226	0.646044	0.622503	0.694875	0.611711	0.621606	0.64599
1347.07	529.945	1151.01	621.011	2393.54	2244.31	1784.78	2086.21	1654.24	1012.31	1851.14	1642.08	3047.57	1330.81	1863.54	1714.32	1254.78	1556.21	1124.25	482.315	1321.14	1112.08	2517.57	800.81	2.96358	2.72627	1.99547	2.47483	1.78788	0.767023	2.101	1.76854	4.00367	1.27352	1.20452	1.13294	0.840041	0.996371	0.788334	0.427595	0.938171	0.751873	1.72949	0.573945	0.645151	0.626946	0.698667	0.612114	0.619019	0.645138
1352.07	529.661	1150.1	620.104	2394.93	2237.69	1782.69	2085.92	1650.97	1010.32	1845.45	1643.49	3042.93	1329.73	1864.93	1707.69	1252.69	1555.93	1120.98	480.326	1315.45	1113.49	2512.93	799.738	2.96579	2.71573	1.99214	2.47438	1.78268	0.763859	2.09195	1.77078	3.99629	1.27182	1.20673	1.1224	0.836714	0.995919	0.783135	0.424432	0.929118	0.754117	1.72211	0.57224	0.646338	0.621115	0.6959	0.611837	0.614937	0.640366
1357.08	529.9	1150.19	620.189	2394.03	2239.85	1782.85	2086.12	1652.49	1010.84	1848.05	1643.98	3044.39	1331.87	1864.03	1709.85	1252.85	1556.13	1122.49	480.84	1318.06	1113.99	2514.4	801.876	2.96435	2.71917	1.99241	2.4747	1.78509	0.764677	2.0961	1.77157	3.99863	1.27522	1.20529	1.12584	0.836976	0.996236	0.785548	0.425249	0.933264	0.754903	1.72445	0.57564	0.645568	0.623018	0.696118	0.612031	0.616831	0.641599
1362.09	528.899	1148.46	618.464	2392.99	2238.69	1784.78	2090.34	1650.44	1013.05	1846.6	1643.42	3044.51	1329.59	1863	1708.7	1254.79	1560.35	1120.44	483.049	1316.61	1113.43	2514.51	799.588	2.96271	2.71733	1.99548	2.48141	1.78183	0.76819	2.09379	1.77067	3.99881	1.27158	1.20365	1.124	0.840047	1.00295	0.782287	0.428762	0.930956	0.75401	1.72463	0.572001	0.644689	0.621999	0.698672	0.616155	0.614271	0.646899
1367.1	529.315	1151.36	621.362	2395.83	2243.49	1785.43	2091.26	1653.1	1012.06	1851.56	1644.2	3049.22	1332.32	1865.84	1713.49	1255.43	1561.26	1123.11	482.06	1321.56	1114.21	2519.23	802.327	2.96723	2.72495	1.99651	2.48286	1.78607	0.766617	2.10167	1.77192	4.00631	1.27594	1.20817	1.13162	0.841076	1.0044	0.786521	0.427189	0.938833	0.755254	1.73213	0.576357	0.647107	0.626216	0.699528	0.617045	0.617595	0.644526
1372.1	529.555	1153.22	623.225	2395.88	2240.56	1787.5	2089.79	1654.39	1013.77	1854.76	1644.73	3047.15	1330.46	1865.88	1710.56	1257.5	1559.79	1124.39	483.77	1324.76	1114.74	2517.16	800.462	2.9673	2.7203	1.9998	2.48053	1.78811	0.769336	2.10676	1.77276	4.00302	1.27297	1.20824	1.12697	0.844371	1.00207	0.788569	0.429909	0.943928	0.756092	1.72884	0.573391	0.647144	0.623643	0.702269	0.615614	0.619204	0.648629
1377.11	529.675	1151.72	621.723	2400.19	2243.45	1787.84	2091.5	1655.59	1012.22	1855.42	1646.8	3052.19	1333.22	1870.19	1713.45	1257.85	1561.5	1125.6	482.225	1325.42	1116.8	2522.2	803.224	2.97415	2.72489	2.00034	2.48325	1.79003	0.766879	2.10781	1.77604	4.01103	1.27736	1.21509	1.13156	0.844915	1.00479	0.790481	0.427452	0.944976	0.759378	1.73685	0.577784	0.650817	0.626186	0.702721	0.617284	0.620705	0.644922
1382.12	529.999	1150.99	620.99	2401.37	2243.71	1787.18	2091.73	1656.27	1012.66	1853.28	1645.6	3049.23	1331.22	1871.37	1713.71	1257.18	1561.74	1126.27	482.662	1323.29	1115.6	2519.23	801.222	2.97603	2.7253	1.99929	2.48362	1.7911	0.767574	2.10441	1.77413	4.00632	1.27418	1.21697	1.13198	0.84386	1.00516	0.791556	0.428147	0.941579	0.757466	1.73214	0.5746	0.651823	0.626413	0.701844	0.617511	0.621549	0.64597
1387.13	527.525	1149.26	619.266	2400.14	2240.42	1783.84	2091.37	1653.78	1010.27	1851.6	1644.01	3046.66	1331.28	1870.15	1710.42	1253.85	1561.37	1123.78	480.277	1321.61	1114.02	2516.67	801.282	2.97408	2.72007	1.99398	2.48304	1.78714	0.763781	2.10174	1.77161	4.00224	1.27427	1.21502	1.12674	0.838555	1.00458	0.787597	0.424354	0.938907	0.754947	1.72806	0.574695	0.650777	0.623516	0.697432	0.617156	0.618441	0.640248
1392.13	530.124	1150.57	620.569	2402.08	2245.13	1787.29	2096.69	1655.15	1013.66	1858.02	1647.61	3054.16	1335.11	1872.09	1715.13	1257.29	1566.69	1125.15	483.664	1328.03	1117.61	2524.17	805.114	2.97717	2.72756	1.99947	2.4915	1.78932	0.769168	2.11195	1.77733	4.01417	1.28037	1.21811	1.13423	0.844037	1.01304	0.789775	0.42974	0.949119	0.760664	1.73999	0.580789	0.65243	0.627663	0.701991	0.622353	0.62015	0.648375
1397.14	528.564	1152	621.999	2402.93	2241.72	1790.01	2094.52	1653.66	1012.33	1856.99	1649.49	3053.2	1332.96	1872.94	1711.72	1260.01	1564.53	1123.66	482.33	1327	1119.5	2523.2	802.959	2.97852	2.72214	2.00379	2.48805	1.78695	0.767046	2.11032	1.78033	4.01263	1.27694	1.21946	1.12881	0.848359	1.00959	0.787407	0.427619	0.947482	0.763667	1.73845	0.577362	0.653153	0.62466	0.705586	0.620237	0.618291	0.645174
1402.15	530.35	1151.2	621.2	2402.67	2244.92	1792	2097.91	1655.24	1015.35	1856.95	1650.68	3059.77	1335.55	1872.67	1714.92	1262	1567.91	1125.24	485.352	1326.95	1120.69	2529.78	805.554	2.9781	2.72722	2.00696	2.49344	1.78946	0.771852	2.11024	1.78222	4.02309	1.28107	1.21904	1.13389	0.851527	1.01497	0.789915	0.432425	0.947408	0.765556	1.74891	0.581489	0.652931	0.627476	0.708221	0.623543	0.62026	0.652425
1407.16	529.875	1148	618.004	2400.08	2247.85	1790.83	2095.1	1656.77	1013.66	1855.12	1646.95	3047.14	1332.6	1870.08	1717.85	1260.84	1565.1	1126.77	483.66	1325.12	1116.96	2517.15	802.602	2.97398	2.73189	2.0051	2.48897	1.7919	0.769161	2.10733	1.77629	4.003	1.27637	1.21492	1.13856	0.849671	1.01051	0.792354	0.429734	0.944493	0.759626	1.72882	0.576795	0.650723	0.630058	0.706677	0.620799	0.622176	0.648365
1412.16	531.121	1150.36	620.359	2404.8	2245.48	1790.79	2096.78	1659.51	1016.24	1857.69	1650.89	3056.74	1335.74	1874.81	1715.48	1260.79	1566.78	1129.51	486.244	1327.69	1120.89	2526.74	805.742	2.98149	2.72812	2.00502	2.49164	1.79626	0.773271	2.11142	1.78254	4.01826	1.28137	1.22243	1.13479	0.849595	1.01318	0.79671	0.433843	0.948581	0.76588	1.74408	0.581788	0.654746	0.62797	0.706614	0.622441	0.625596	0.654565
1417.17	528.208	1151.43	621.437	2400.29	2245.53	1788.73	2092.56	1658.55	1014.28	1857.47	1646.76	3051.78	1334.33	1870.3	1715.53	1258.74	1562.56	1128.55	484.286	1327.47	1116.76	2521.78	804.331	2.97432	2.7282	2.00176	2.48493	1.79473	0.770157	2.11107	1.77598	4.01038	1.27912	1.21526	1.13487	0.84633	1.00647	0.79518	0.430729	0.948231	0.759316	1.7362	0.579544	0.650905	0.628015	0.703898	0.618319	0.624395	0.649867
1422.18	527.912	1150.73	620.736	2404.42	2249.47	1791.09	2097.11	1661.88	1013.65	1860.52	1648.52	3058.26	1336.03	1874.42	1719.47	1261.1	1567.11	1131.88	483.652	1330.52	1118.52	2528.26	806.032	2.98088	2.73447	2.00551	2.49217	1.80003	0.769149	2.11592	1.77878	4.02067	1.28183	1.22182	1.14114	0.850085	1.01371	0.800482	0.429721	0.953087	0.762115	1.74649	0.582249	0.654419	0.631484	0.707021	0.622763	0.628558	0.648346
1427.19	529.843	1146.65	616.649	2403.41	2248.82	1793.38	2097.79	1659.11	1016.16	1857.62	1650.56	3059.08	1335.26	1873.41	1718.83	1263.38	1567.79	1129.11	486.161	1327.63	1120.56	2529.08	805.26	2.97927	2.73344	2.00914	2.49325	1.79562	0.773139	2.11131	1.78202	4.02198	1.2806	1.22021	1.14011	0.853712	1.01479	0.796075	0.433711	0.948481	0.765354	1.7478	0.581022	0.653557	0.630915	0.710038	0.623428	0.625098	0.654366
1432.2	530.022	1150.65	620.652	2404.58	2249.7	1791.04	2099.8	1662.52	1017.45	1861.34	1651.54	3061.24	1336.9	1874.58	1719.7	1261.05	1569.8	1132.53	487.453	1331.34	1121.54	2531.24	806.9	2.98114	2.73483	2.00543	2.49644	1.80105	0.775193	2.11722	1.78358	4.02542	1.28321	1.22208	1.1415	0.850002	1.01798	0.801505	0.435766	0.954391	0.766919	1.75124	0.58363	0.654556	0.631685	0.706952	0.62539	0.629361	0.657466
1437.2	528.55	1149.29	619.289	2403.91	2245.11	1786.13	2092.93	1660.95	1013.83	1854.21	1646.09	3054.02	1333	1873.91	1715.11	1256.13	1562.93	1130.96	483.837	1324.22	1116.09	2524.03	803.001	2.98007	2.72753	1.99762	2.48552	1.79855	0.769443	2.1059	1.77492	4.01394	1.27701	1.22101	1.1342	0.842192	1.00705	0.799005	0.430015	0.943061	0.758253	1.73976	0.577429	0.653985	0.627645	0.700457	0.618677	0.627398	0.64879
1442.21	529.052	1151.79	621.798	2407.69	2250.15	1794.34	2100.34	1663.28	1015.29	1860.49	1650.71	3060.87	1336.09	1877.69	1720.15	1264.35	1570.35	1133.28	485.294	1330.49	1120.72	2530.87	806.096	2.98608	2.73554	2.01068	2.49731	1.80225	0.77176	2.11587	1.78227	4.02482	1.28193	1.22702	1.14222	0.855252	1.01885	0.802705	0.432332	0.953037	0.765604	1.75065	0.582351	0.657203	0.63208	0.711318	0.625923	0.630304	0.652286
1447.22	529.608	1151	621.005	2404.59	2245.86	1792.41	2098.93	1660.06	1015.02	1859.26	1650.92	3056.58	1334.28	1874.59	1715.87	1262.42	1568.94	1130.06	485.022	1329.26	1120.92	2526.58	804.284	2.98115	2.72873	2.00761	2.49507	1.79713	0.771327	2.11391	1.7826	4.018	1.27905	1.22209	1.1354	0.852181	1.01661	0.797586	0.4319	0.95108	0.765934	1.74382	0.579469	0.654563	0.62831	0.708764	0.624545	0.626284	0.651633
1452.23	528.823	1152.26	622.259	2407.94	2246.33	1792.97	2097.61	1657.53	1015.44	1858.65	1650.85	3057.56	1334.52	1877.94	1716.34	1262.97	1567.61	1127.54	485.444	1328.65	1120.85	2527.56	804.526	2.98647	2.72948	2.00849	2.49297	1.79311	0.771999	2.11294	1.78248	4.01956	1.27943	1.22741	1.13615	0.853062	1.01451	0.793569	0.432571	0.950108	0.76582	1.74538	0.579854	0.657416	0.628723	0.709497	0.623255	0.62313	0.652646
1457.23	528.758	1151.67	621.669	2403.89	2243.87	1792.32	2096.26	1656	1016.86	1855.95	1649.98	3057.16	1335.07	1873.9	1713.88	1262.32	1566.27	1126.01	486.863	1325.96	1119.98	2527.16	805.075	2.98004	2.72557	2.00746	2.49082	1.79068	0.774255	2.10866	1.7811	4.01892	1.28031	1.22098	1.13224	0.852027	1.01236	0.791134	0.434827	0.945824	0.764435	1.74475	0.580727	0.653972	0.626559	0.708636	0.621939	0.621218	0.65605
1462.24	529.634	1151.08	621.086	2406.22	2246.34	1794.05	2098.85	1658.73	1013.76	1860.3	1651.11	3058.22	1335.44	1876.22	1716.35	1264.05	1568.86	1128.73	483.759	1330.3	1121.11	2528.22	805.44	2.98374	2.7295	2.01022	2.49494	1.79501	0.769319	2.11556	1.7829	4.02061	1.28089	1.22468	1.13617	0.854786	1.01648	0.795465	0.429891	0.95273	0.766233	1.74644	0.581308	0.655952	0.628732	0.710931	0.624469	0.624618	0.648603
1467.25	529.941	1151.46	621.459	2406.02	2246.34	1792.61	2097.47	1658.44	1015.65	1863.95	1650.06	3056.28	1335.4	1876.03	1716.35	1262.61	1567.47	1128.45	485.65	1333.96	1120.07	2526.29	805.408	2.98343	2.72949	2.00792	2.49274	1.79456	0.772326	2.12138	1.78124	4.01754	1.28084	1.22437	1.13616	0.852488	1.01428	0.795018	0.432898	0.958546	0.764572	1.74336	0.581257	0.655787	0.628731	0.709019	0.623116	0.624267	0.65314
1472.26	529.125	1151.21	621.218	2407.08	2248.98	1791.91	2093.05	1653.96	1016.09	1862.02	1650.49	3058.28	1334.33	1877.09	1718.98	1261.91	1563.05	1123.96	486.092	1332.02	1120.49	2528.29	804.334	2.98512	2.73368	2.00681	2.48571	1.78743	0.773029	2.1183	1.78191	4.02072	1.27913	1.22606	1.14035	0.851378	1.00725	0.787884	0.433601	0.95547	0.765243	1.74654	0.579549	0.65669	0.631049	0.708096	0.6188	0.618666	0.6542
1477.27	528.358	1150.93	620.937	2403.63	2247.82	1790.11	2095.68	1657.74	1014.53	1859.76	1650.19	3056.76	1334.66	1873.63	1717.82	1260.11	1565.69	1127.74	484.534	1329.77	1120.19	2526.76	804.663	2.97962	2.73183	2.00395	2.4899	1.79344	0.770551	2.11472	1.78143	4.01829	1.27965	1.22056	1.13851	0.848517	1.01144	0.793892	0.431124	0.951883	0.764766	1.74411	0.580072	0.653747	0.630027	0.705717	0.62137	0.623383	0.650462
1482.27	529.64	1150.13	620.133	2405.77	2247.93	1794.46	2096.32	1657.57	1016.93	1860.57	1648.25	3061.53	1335.52	1875.77	1717.94	1264.47	1566.32	1127.57	486.93	1330.57	1118.25	2531.54	805.519	2.98303	2.73202	2.01087	2.49091	1.79317	0.774362	2.116	1.77835	4.02589	1.28101	1.22397	1.13869	0.855444	1.01245	0.79362	0.434934	0.953163	0.761688	1.75171	0.581433	0.655572	0.630132	0.711478	0.621989	0.62317	0.656211
1487.28	529.448	1150.99	620.998	2408.16	2251.44	1794.94	2100.11	1661.59	1017.35	1860.44	1653.6	3067.52	1335.14	1878.17	1721.44	1264.94	1570.11	1131.6	487.35	1330.44	1123.6	2537.52	805.139	2.98683	2.7376	2.01163	2.49693	1.79957	0.77503	2.11579	1.78685	4.0354	1.28041	1.22777	1.14427	0.8562	1.01847	0.800026	0.435602	0.952959	0.770187	1.76123	0.580829	0.657608	0.633215	0.712107	0.625692	0.6282	0.657219
1492.29	528.32	1149.8	619.799	2408.74	2250.15	1793.97	2098.61	1655.47	1017.56	1864.95	1651.45	3065.24	1334.75	1878.75	1720.15	1263.97	1568.61	1125.47	487.567	1334.96	1121.46	2535.24	804.75	2.98776	2.73554	2.01008	2.49455	1.78983	0.775375	2.12297	1.78344	4.03177	1.27979	1.2287	1.14221	0.854654	1.01609	0.790283	0.435947	0.960141	0.766779	1.7576	0.580211	0.658102	0.632078	0.710821	0.624227	0.62055	0.657739
1497.3	528.682	1151.97	621.976	2404.45	2250.96	1791.64	2096.27	1658.7	1014.17	1866.38	1648.4	3059.73	1336.41	1874.46	1720.96	1261.65	1566.28	1128.71	484.178	1336.38	1118.41	2529.73	806.41	2.98093	2.73683	2.00639	2.49084	1.79497	0.769985	2.12523	1.7786	4.02302	1.28243	1.22187	1.1435	0.850961	1.01238	0.795426	0.430558	0.962401	0.761933	1.74884	0.58285	0.654449	0.632793	0.70775	0.621948	0.624588	0.649608
1502.3	528.194	1151.17	621.169	2406.62	2248.47	1792.26	2097.28	1655.42	1016.28	1863.32	1648.69	3062.59	1335.18	1876.63	1718.47	1262.26	1567.28	1125.42	486.286	1333.32	1118.69	2532.59	805.181	2.98439	2.73287	2.00736	2.49243	1.78975	0.773338	2.12037	1.77905	4.02756	1.28047	1.22533	1.13954	0.851931	1.01397	0.790204	0.43391	0.957536	0.762383	1.75339	0.580896	0.656299	0.630602	0.708557	0.622928	0.620488	0.654666
1507.31	529.232	1155.75	625.752	2411.88	2252.42	1795.49	2102.54	1658.75	1016.32	1867.4	1654.23	3070.05	1336.18	1881.88	1722.43	1265.49	1572.54	1128.76	486.321	1337.4	1124.24	2540.05	806.188	2.99274	2.73916	2.0125	2.5008	1.79505	0.773393	2.12686	1.78787	4.03942	1.28208	1.23368	1.14583	0.857069	1.02234	0.795509	0.433966	0.964029	0.771202	1.76524	0.582497	0.660771	0.634083	0.71283	0.628066	0.624653	0.65475
1512.32	528.573	1152.32	622.327	2408.29	2254.16	1796.71	2100.56	1659.06	1019.05	1865.02	1652.32	3072.51	1337.92	1878.3	1724.17	1266.71	1570.56	1129.06	489.053	1335.02	1122.32	2542.51	807.923	2.98704	2.74193	2.01444	2.49765	1.79554	0.777738	2.12307	1.78481	4.04334	1.28483	1.22798	1.1486	0.859013	1.01919	0.795989	0.43831	0.960238	0.768151	1.76916	0.585257	0.657719	0.635615	0.714446	0.626132	0.62503	0.661305
1517.33	529.013	1151.91	621.912	2408.44	2250.04	1796.12	2098.76	1659.66	1017.03	1861.36	1653.07	3063.38	1335.21	1878.44	1720.04	1266.12	1568.76	1129.67	487.031	1331.36	1123.07	2533.38	805.215	2.98728	2.73537	2.01351	2.49479	1.7965	0.774522	2.11726	1.78601	4.02882	1.28053	1.22822	1.14204	0.858079	1.01633	0.796955	0.435095	0.954422	0.769349	1.75464	0.58095	0.657846	0.631982	0.71367	0.624376	0.625788	0.656453
1522.33	529.476	1150.45	620.455	2409.28	2251.97	1797.79	2099.25	1661.91	1019.17	1865.32	1653.65	3066.12	1338.05	1879.28	1721.97	1267.79	1569.25	1131.91	489.176	1335.32	1123.66	2536.12	808.052	2.98861	2.73844	2.01616	2.49557	1.80007	0.777934	2.12355	1.78694	4.03318	1.28504	1.22955	1.14511	0.860729	1.01711	0.800525	0.438506	0.960717	0.770279	1.759	0.585462	0.65856	0.633682	0.715873	0.624852	0.628592	0.6616
1527.34	529.168	1155.69	625.698	2413.34	2254.48	1799.03	2099.93	1665.05	1018.92	1868.02	1655.18	3071.23	1338.4	1883.34	1724.48	1269.04	1569.93	1135.05	488.926	1338.02	1125.19	2541.23	808.401	2.99506	2.74243	2.01814	2.49666	1.80507	0.777536	2.12784	1.78937	4.0413	1.28559	1.236	1.1491	0.86271	1.01819	0.805522	0.438108	0.965007	0.772711	1.76712	0.586017	0.662015	0.635891	0.717521	0.625521	0.632515	0.661
1532.35	530.35	1156.54	626.547	2415.39	2256.02	1800.62	2100.07	1666.75	1019.31	1867.61	1655.4	3072.03	1339.21	1885.39	1726.03	1270.62	1570.07	1136.75	489.315	1337.62	1125.41	2542.03	809.215	2.99832	2.74489	2.02066	2.49687	1.80776	0.778155	2.1272	1.78973	4.04257	1.28689	1.23926	1.15156	0.865232	1.01841	0.808219	0.438727	0.964368	0.773065	1.76839	0.587311	0.663763	0.637251	0.719619	0.625652	0.634633	0.661934
1537.36	529.875	1152.58	622.58	2409.07	2256.66	1795.63	2100.24	1667.33	1019.66	1866.23	1653.45	3068.79	1336.71	1879.08	1726.67	1265.63	1570.24	1137.33	489.659	1336.23	1123.45	2538.79	806.713	2.98828	2.74591	2.01273	2.49715	1.80869	0.778702	2.125	1.78662	4.03743	1.28291	1.22922	1.15258	0.857298	1.01869	0.809148	0.439274	0.962164	0.769956	1.76325	0.583332	0.658383	0.637813	0.71302	0.625823	0.635362	0.662759
1542.37	529.487	1153.88	623.879	2409.31	2255.28	1796.8	2095.76	1663.28	1019.21	1863.38	1651.89	3071	1336.61	1879.31	1725.28	1266.8	1565.76	1133.28	489.21	1333.38	1121.89	2541	806.617	2.98865	2.74371	2.01459	2.49001	1.80225	0.777988	2.12046	1.78413	4.04094	1.28276	1.22959	1.15038	0.859156	1.01155	0.802708	0.43856	0.95763	0.767471	1.76676	0.58318	0.658584	0.636597	0.714565	0.621441	0.630306	0.661682
1547.37	528.907	1151.68	621.681	2407.93	2253.6	1797.1	2093.86	1662.31	1017.2	1863.09	1652.2	3066.41	1334.99	1877.93	1723.6	1267.1	1563.86	1132.31	487.203	1333.09	1122.21	2536.41	804.99	2.98646	2.74104	2.01506	2.487	1.80071	0.774796	2.12001	1.78464	4.03363	1.28017	1.2274	1.14771	0.859631	1.00854	0.801159	0.435368	0.957174	0.767976	1.75946	0.580592	0.657411	0.635119	0.714961	0.619591	0.62909	0.656866
1552.38	529.001	1148.75	618.756	2411.76	2257.49	1799.3	2101.58	1661.91	1019.3	1865.74	1653.67	3070	1337.11	1881.76	1727.49	1269.31	1571.59	1131.91	489.305	1335.75	1123.67	2540	807.111	2.99255	2.74721	2.01857	2.49928	1.80007	0.778139	2.12423	1.78697	4.03935	1.28354	1.23349	1.15388	0.863141	1.02082	0.800523	0.438711	0.961397	0.770308	1.76517	0.583965	0.660672	0.638538	0.71788	0.627134	0.628591	0.66191
1557.39	528.584	1151.48	621.487	2413.29	2256.08	1800.77	2099.32	1661.29	1016.67	1866.07	1654.54	3067	1337.53	1883.29	1726.09	1270.78	1569.33	1131.29	486.671	1336.07	1124.55	2537	807.529	2.99498	2.74498	2.02091	2.49569	1.79908	0.77395	2.12475	1.78836	4.03458	1.28421	1.23592	1.15166	0.865477	1.01723	0.799536	0.434522	0.961914	0.771693	1.7604	0.58463	0.661974	0.637304	0.719823	0.624929	0.627815	0.65559
1562.4	527.407	1149.92	619.927	2409.85	2255.2	1799.21	2098.23	1664.94	1016.3	1863.06	1653.19	3068.39	1334.68	1879.86	1725.2	1269.21	1568.23	1134.94	486.299	1333.06	1123.19	2538.39	804.682	2.98952	2.74358	2.01842	2.49394	1.80489	0.773358	2.11995	1.7862	4.03678	1.27968	1.23046	1.15025	0.86299	1.01548	0.805347	0.433931	0.957121	0.769541	1.7626	0.580102	0.659049	0.636526	0.717754	0.623855	0.632378	0.654697
1567.4	527.565	1148.33	618.33	2412.28	2255.92	1802.57	2094.12	1662.33	1018.36	1863.41	1652.91	3071.39	1338.78	1882.28	1725.92	1272.58	1564.13	1132.33	488.358	1333.41	1122.91	2541.4	808.782	2.99338	2.74472	2.02377	2.48742	1.80074	0.776633	2.12051	1.78575	4.04157	1.2862	1.23432	1.15139	0.868341	1.00896	0.801196	0.437205	0.957678	0.769091	1.76739	0.586623	0.661117	0.637157	0.722205	0.619847	0.629119	0.659637
1572.41	529.318	1151.17	621.171	2415.28	2256.95	1801.83	2100.48	1664.97	1019.19	1868.4	1653.57	3069.87	1338.22	1885.28	1726.95	1271.84	1570.48	1134.97	489.192	1338.4	1123.58	2539.87	808.221	2.99815	2.74636	2.02259	2.49753	1.80494	0.777959	2.12845	1.78681	4.03914	1.28531	1.23909	1.15303	0.867165	1.01907	0.805393	0.438531	0.965613	0.77015	1.76496	0.58573	0.663669	0.638067	0.721226	0.626057	0.632414	0.661638
1577.42	528.745	1152.84	622.844	2413.74	2255.4	1801.12	2095.85	1666.15	1018.94	1865.43	1653.04	3067.75	1337.43	1883.74	1725.4	1271.12	1565.85	1136.16	488.942	1335.44	1123.04	2537.75	807.433	2.9957	2.7439	2.02145	2.49016	1.80682	0.777561	2.12374	1.78597	4.03577	1.28406	1.23664	1.15057	0.866024	1.0117	0.807276	0.438134	0.960901	0.769303	1.76159	0.584477	0.662359	0.636701	0.720278	0.621532	0.633893	0.661039
1582.43	529.935	1156.44	626.445	2412.64	2255.28	1799.07	2098.83	1667.53	1019.46	1870.5	1656.53	3070.31	1337	1882.64	1725.28	1269.08	1568.84	1137.53	489.46	1340.5	1126.53	2540.31	807.004	2.99395	2.7437	2.0182	2.49491	1.80901	0.778385	2.13179	1.79151	4.03984	1.28337	1.23489	1.15037	0.862774	1.01645	0.809464	0.438957	0.968961	0.774848	1.76566	0.583795	0.661418	0.636594	0.717574	0.624449	0.635611	0.662281
1587.43	527.777	1151.1	621.102	2412.76	2256.33	1798.88	2100.13	1664.48	1019.04	1869.65	1654.78	3068.74	1336.32	1882.76	1726.33	1268.89	1570.13	1134.48	489.046	1339.66	1124.79	2538.75	806.325	2.99415	2.74537	2.0179	2.49697	1.80415	0.777727	2.13045	1.78874	4.03735	1.28229	1.23509	1.15204	0.862473	1.01851	0.804609	0.438299	0.967612	0.772076	1.76317	0.582715	0.661526	0.637519	0.717324	0.625715	0.631799	0.661288
1592.44	527.216	1149.79	619.789	2413.58	2254.69	1802.85	2098.06	1664.81	1019.17	1865.45	1653.06	3068.17	1335.9	1883.59	1724.69	1272.85	1568.06	1134.81	489.17	1335.45	1123.06	2538.17	805.908	2.99546	2.74277	2.02421	2.49367	1.80468	0.777924	2.12376	1.78599	4.03644	1.28163	1.2364	1.14944	0.868782	1.01521	0.805138	0.438496	0.960928	0.769328	1.76226	0.582052	0.662227	0.636076	0.722571	0.623689	0.632214	0.661586
1597.45	527.731	1146.88	616.888	2412.13	2252.16	1801.42	2097.71	1663.28	1017.35	1867.06	1654.76	3066.32	1335.79	1882.13	1722.17	1271.42	1567.71	1133.29	487.349	1337.06	1124.77	2536.32	805.794	2.99314	2.73875	2.02193	2.49312	1.80226	0.775028	2.12632	1.78871	4.03349	1.28145	1.23408	1.14542	0.866501	1.01466	0.802712	0.4356	0.963487	0.772043	1.75931	0.581871	0.660988	0.633853	0.720675	0.62335	0.630309	0.657216
1602.46	527.281	1149.84	619.845	2415.87	2259.57	1803.98	2101.87	1663.46	1019.83	1868.56	1656.19	3074.89	1337.67	1885.88	1729.57	1273.99	1571.87	1133.46	489.836	1338.56	1126.19	2544.9	807.676	2.9991	2.75053	2.02601	2.49974	1.80253	0.778983	2.1287	1.79098	4.04713	1.28444	1.24004	1.1572	0.870582	1.02128	0.802988	0.439555	0.965869	0.774314	1.77295	0.584864	0.664177	0.640372	0.724069	0.627415	0.630526	0.663184
1607.46	527.423	1151	621.001	2415.24	2262.11	1805.08	2105.32	1665.04	1019.25	1865.83	1654.54	3075.64	1339.62	1885.24	1732.11	1275.08	1575.33	1135.04	489.258	1335.83	1124.55	2545.64	809.627	2.99808	2.75456	2.02775	2.50523	1.80505	0.778064	2.12436	1.78836	4.04832	1.28754	1.23902	1.16123	0.872324	1.02677	0.805503	0.438636	0.961528	0.771696	1.77414	0.587966	0.663634	0.642604	0.725517	0.630789	0.6325	0.661797
1612.47	528.06	1152.64	622.644	2417.56	2260.64	1805.63	2104.7	1667.33	1020.64	1868.45	1654.86	3077.05	1340.01	1887.56	1730.64	1275.64	1574.7	1137.34	490.645	1338.45	1124.87	2547.05	810.014	3.00177	2.75223	2.02864	2.50424	1.8087	0.78027	2.12853	1.78887	4.05056	1.28816	1.24271	1.1589	0.873206	1.02578	0.809152	0.440842	0.965693	0.772203	1.77638	0.588582	0.665611	0.641313	0.726251	0.630181	0.635366	0.665125
1617.48	526.471	1152.72	622.727	2415.01	2257.8	1801.84	2104.99	1664.88	1018.83	1866.45	1653.69	3070.66	1337.55	1885.01	1727.8	1271.84	1574.99	1134.89	488.832	1336.45	1123.69	2540.66	807.554	2.99772	2.74771	2.0226	2.5047	1.8048	0.777386	2.12535	1.787	4.0404	1.28425	1.23866	1.15438	0.867173	1.02624	0.805256	0.437959	0.96252	0.770332	1.76622	0.58467	0.663438	0.63881	0.721233	0.630465	0.632307	0.660775
1622.49	527.786	1150.9	620.903	2418.36	2259.47	1806.49	2104.2	1665.64	1020.38	1866.16	1653.71	3076.2	1339.5	1888.37	1729.48	1276.5	1574.21	1135.65	490.386	1336.16	1123.71	2546.2	809.505	3.00306	2.75038	2.03	2.50345	1.80601	0.779858	2.12489	1.78703	4.04921	1.28735	1.244	1.15705	0.874572	1.02499	0.806468	0.44043	0.962053	0.770368	1.77503	0.587772	0.666298	0.640288	0.727387	0.629695	0.633258	0.664503
1627.49	529.156	1148.87	618.869	2416.26	2261.62	1806.03	2101.61	1663.34	1019.77	1870.35	1656.82	3075.87	1338.49	1886.26	1731.63	1276.03	1571.62	1133.34	489.77	1340.35	1126.83	2545.87	808.49	2.99971	2.7538	2.02926	2.49933	1.80235	0.778878	2.13155	1.79199	4.04868	1.28574	1.24065	1.16047	0.873833	1.02087	0.802801	0.43945	0.968714	0.775322	1.7745	0.586158	0.664504	0.64218	0.726772	0.627165	0.630379	0.663025
1632.5	528.471	1153.23	623.238	2418.5	2263.97	1806.11	2104.54	1668.24	1020.68	1870.47	1657.5	3078.76	1339.59	1888.51	1733.97	1276.12	1574.55	1138.24	490.684	1340.47	1127.5	2548.76	809.596	3.00328	2.75753	2.0294	2.50399	1.81013	0.780332	2.13174	1.79306	4.05328	1.2875	1.24422	1.1642	0.873971	1.02553	0.810588	0.440904	0.968905	0.776394	1.7791	0.587917	0.666416	0.644245	0.726887	0.630027	0.636494	0.665218
1637.51	527.926	1151.36	621.36	2417.69	2256.88	1806.35	2104.54	1666.73	1021.24	1868.41	1656.09	3078.59	1338	1887.69	1726.89	1276.35	1574.55	1136.73	491.238	1338.41	1126.09	2548.6	808.004	3.00198	2.74626	2.02977	2.50399	1.80774	0.781213	2.12847	1.79082	4.05301	1.28496	1.24292	1.15293	0.87434	1.02553	0.80819	0.441785	0.965634	0.774155	1.77884	0.585385	0.665723	0.638008	0.727194	0.630026	0.634611	0.666547
1642.52	527.172	1154.7	624.707	2418.82	2256.57	1807.69	2103.79	1666.23	1019.48	1867.42	1657.98	3078.26	1338.89	1888.82	1726.57	1277.69	1573.79	1136.23	489.479	1337.43	1127.99	2548.26	808.891	3.00378	2.74575	2.03191	2.50279	1.80695	0.778415	2.1269	1.79383	4.05248	1.28637	1.24472	1.15242	0.876476	1.02433	0.8074	0.438988	0.964068	0.777167	1.7783	0.586796	0.666686	0.637728	0.72897	0.629288	0.63399	0.662327
1647.53	529.232	1156.97	626.974	2421.57	2262.05	1807.3	2104.86	1669.86	1020.88	1872.9	1659.23	3081.52	1340.59	1891.57	1732.05	1277.3	1574.86	1139.86	490.879	1342.9	1129.23	2551.53	810.596	3.00815	2.75447	2.03128	2.50449	1.81271	0.780642	2.13561	1.79581	4.05768	1.28909	1.24909	1.16114	0.875852	1.02603	0.813163	0.441214	0.972773	0.77915	1.7835	0.589507	0.669025	0.642553	0.728452	0.630335	0.638516	0.665686
1652.53	527.259	1155	625.005	2419.68	2260.98	1807.39	2104.21	1668.58	1019.57	1871.58	1657.9	3082.03	1339.24	1889.69	1730.99	1277.39	1574.21	1138.59	489.574	1341.59	1127.91	2552.04	809.24	3.00516	2.75278	2.03142	2.50346	1.81069	0.778566	2.13352	1.7937	4.05849	1.28693	1.2461	1.15945	0.875994	1.02499	0.811142	0.439139	0.970682	0.777041	1.78431	0.587351	0.667423	0.641615	0.72857	0.629699	0.636928	0.662555
1657.54	528.383	1158.31	628.316	2421.52	2262.93	1809.71	2107.02	1672.16	1020.62	1874.35	1660.51	3081.74	1338.78	1891.52	1732.93	1279.72	1577.03	1142.16	490.628	1344.35	1130.52	2551.75	808.779	3.00807	2.75587	2.03512	2.50793	1.81638	0.780243	2.13791	1.79785	4.05802	1.2862	1.24901	1.16254	0.879693	1.02947	0.81683	0.440815	0.975074	0.781189	1.78384	0.586618	0.668985	0.643327	0.731646	0.632449	0.641395	0.665084
1662.55	528.38	1156.7	626.701	2422.67	2263.69	1810.45	2106.2	1669.2	1021.29	1875.02	1660.16	3084.37	1342.4	1892.67	1733.69	1280.45	1576.2	1139.21	491.296	1345.03	1130.17	2554.38	812.406	3.0099	2.75708	2.0363	2.50662	1.81167	0.781305	2.13898	1.79729	4.06221	1.29196	1.25084	1.16375	0.880867	1.02816	0.812126	0.441877	0.976151	0.78063	1.78803	0.592386	0.669962	0.643997	0.732622	0.631644	0.637701	0.666687
1667.56	528.281	1154.7	624.699	2419.84	2260.81	1807.7	2104.56	1670.77	1020.9	1874.34	1658.53	3085.54	1340.53	1889.84	1730.82	1277.71	1574.56	1140.78	490.902	1344.35	1128.54	2555.54	810.535	3.0054	2.75251	2.03193	2.50401	1.81417	0.780678	2.1379	1.7947	4.06406	1.28899	1.24634	1.15918	0.876498	1.02555	0.814623	0.441251	0.975071	0.77804	1.78988	0.58941	0.667555	0.641466	0.728989	0.630041	0.639662	0.665741
1672.57	527.828	1156.2	626.204	2423.51	2264.97	1810.03	2103.78	1670.11	1021	1874.2	1660.05	3084.81	1340.77	1893.52	1734.97	1280.04	1573.79	1140.11	491.004	1344.2	1130.05	2554.81	810.777	3.01125	2.75912	2.03563	2.50278	1.81311	0.780841	2.13768	1.79711	4.0629	1.28937	1.25219	1.16579	0.880203	1.02432	0.813565	0.441413	0.974843	0.780447	1.78872	0.589795	0.670685	0.645125	0.732071	0.629284	0.638831	0.665986
1677.57	528.202	1155.46	625.461	2423.12	2262.23	1808.93	2106.27	1668.56	1021.84	1875.76	1657.64	3079.75	1339.75	1893.12	1732.24	1278.94	1576.27	1138.56	491.847	1345.76	1127.64	2549.76	809.754	3.01062	2.75476	2.03389	2.50673	1.81065	0.782181	2.14016	1.79328	4.05486	1.28775	1.25156	1.16143	0.878457	1.02827	0.811102	0.442754	0.977326	0.776618	1.78068	0.588168	0.670348	0.642715	0.730618	0.631712	0.636897	0.668009
1682.58	527.853	1155.57	625.574	2420.97	2263.66	1810.1	2104.73	1668.51	1022.39	1877.14	1658.58	3080.79	1340.38	1890.97	1733.67	1280.1	1574.73	1138.51	492.393	1347.14	1128.58	2550.8	810.382	3.0072	2.75704	2.03574	2.50428	1.81057	0.783049	2.14235	1.79478	4.05651	1.28875	1.24814	1.16371	0.880308	1.02582	0.811022	0.443622	0.979512	0.778116	1.78234	0.589167	0.668514	0.643973	0.732158	0.630208	0.636835	0.669319
1687.59	528.143	1156.29	626.297	2422.64	2262.74	1808.41	2106.73	1667.55	1021.59	1874.46	1658.35	3079.55	1339.74	1892.64	1732.74	1278.41	1576.73	1137.55	491.597	1344.47	1128.36	2549.55	809.745	3.00985	2.75556	2.03305	2.50746	1.80904	0.781784	2.1381	1.79442	4.05453	1.28773	1.25079	1.16224	0.877616	1.029	0.809494	0.442356	0.975265	0.777752	1.78036	0.588154	0.669936	0.643159	0.729919	0.632162	0.635635	0.667409
1692.6	529.625	1157.1	627.106	2420.72	2262.14	1808.36	2106.43	1670.09	1022.45	1876.52	1661.08	3081.07	1341.81	1890.73	1732.15	1278.36	1576.43	1140.09	492.452	1346.52	1131.09	2551.07	811.811	3.00681	2.75462	2.03297	2.50699	1.81308	0.783143	2.14136	1.79876	4.05695	1.29102	1.24775	1.16129	0.87754	1.02853	0.813532	0.443716	0.978531	0.782093	1.78277	0.59144	0.668309	0.642635	0.729855	0.631868	0.638805	0.66946
1697.6	527.639	1156.56	626.568	2421.73	2264.66	1809.58	2106.44	1670.03	1021.16	1874.81	1659.97	3083.51	1339.63	1891.74	1734.67	1279.59	1576.44	1140.03	491.166	1344.81	1129.98	2553.52	809.635	3.00841	2.75863	2.03492	2.50701	1.81298	0.781098	2.13865	1.797	4.06084	1.28756	1.24935	1.1653	0.879489	1.02855	0.813437	0.441671	0.975812	0.780333	1.78666	0.587979	0.669167	0.644854	0.731477	0.631881	0.63873	0.666375
1702.61	528.208	1152.88	622.885	2422.8	2262.18	1810.04	2109.91	1669.38	1022.03	1875.29	1658.8	3085.28	1339.4	1892.81	1732.18	1280.04	1579.92	1139.38	492.03	1345.29	1128.8	2555.28	809.404	3.01012	2.75468	2.03565	2.51253	1.81195	0.782472	2.13941	1.79513	4.06365	1.28719	1.25106	1.16135	0.880216	1.03407	0.812406	0.443045	0.976577	0.778464	1.78947	0.587612	0.670078	0.642669	0.732081	0.635275	0.637921	0.668448
1707.62	528.616	1155.02	625.022	2421.71	2259.74	1807.58	2108.54	1667.93	1022.09	1873.71	1657.85	3083.05	1337.5	1891.71	1729.74	1277.58	1578.54	1137.93	492.088	1343.72	1127.85	2553.05	807.504	3.00837	2.7508	2.03172	2.51034	1.80964	0.782564	2.1369	1.79361	4.0601	1.28417	1.24931	1.15747	0.876294	1.03188	0.810097	0.443137	0.974067	0.776947	1.78592	0.58459	0.669146	0.640521	0.72882	0.633929	0.636108	0.668587
1712.63	529.389	1159.04	629.046	2421.94	2264	1808.91	2108.34	1669.87	1021.99	1876.71	1660.68	3085.91	1341.09	1891.94	1734.01	1278.91	1578.34	1139.87	491.993	1346.71	1130.68	2555.91	811.088	3.00875	2.75758	2.03384	2.51003	1.81273	0.782413	2.14166	1.79812	4.06465	1.28987	1.24969	1.16425	0.878414	1.03157	0.813181	0.442986	0.978829	0.781456	1.79047	0.59029	0.669345	0.644272	0.730583	0.633736	0.638529	0.668359
1717.63	527.555	1156.84	626.843	2423.69	2262.69	1810.45	2107.93	1671.15	1022.17	1877.03	1660.52	3085.09	1340.3	1893.69	1732.69	1280.46	1577.94	1141.15	492.174	1347.03	1130.52	2555.09	810.306	3.01152	2.75548	2.0363	2.50938	1.81476	0.782701	2.14218	1.79786	4.06334	1.28862	1.25246	1.16215	0.880875	1.03092	0.815219	0.443274	0.979342	0.781192	1.78916	0.589046	0.670831	0.643114	0.732629	0.63334	0.64013	0.668793
1722.64	527.955	1156.16	626.166	2423.13	2262.16	1811.12	2108.11	1670.76	1022.57	1876.97	1662.88	3087.38	1341.19	1893.13	1732.16	1281.12	1578.12	1140.76	492.568	1346.97	1132.89	2557.38	811.198	3.01064	2.75464	2.03736	2.50967	1.81415	0.783328	2.14208	1.80162	4.06699	1.29004	1.25158	1.16131	0.88193	1.03121	0.814602	0.4439	0.979248	0.784959	1.79281	0.590465	0.670358	0.642648	0.733507	0.633516	0.639646	0.669739
1727.65	528.052	1156.88	626.88	2425.34	2264.1	1809.87	2109.78	1670.32	1023.66	1874.23	1659.72	3085.9	1338.74	1895.35	1734.1	1279.87	1579.78	1140.32	493.662	1344.23	1129.72	2555.9	808.743	3.01415	2.75773	2.03537	2.51231	1.81345	0.785068	2.13772	1.79659	4.06464	1.28614	1.25509	1.1644	0.879938	1.03385	0.813902	0.44564	0.974886	0.779924	1.79046	0.586561	0.672242	0.644359	0.73185	0.635139	0.639096	0.672364
1732.66	526.925	1154.92	624.919	2421.25	2263.58	1811.28	2106.46	1669.06	1022.73	1873.61	1659.96	3085.94	1339.19	1891.25	1733.58	1281.28	1576.47	1139.06	492.733	1343.61	1129.97	2555.94	809.195	3.00765	2.7569	2.03761	2.50704	1.81144	0.78359	2.13674	1.79698	4.06469	1.28686	1.24859	1.16357	0.88218	1.02858	0.811891	0.444163	0.973907	0.780312	1.79052	0.587279	0.668757	0.6439	0.733715	0.631903	0.637517	0.670135
1737.66	527.682	1154.33	624.335	2424.95	2265.71	1811.19	2108.89	1672.02	1021.96	1876.24	1661.64	3088.12	1339.93	1894.96	1735.71	1281.19	1578.9	1142.03	491.963	1346.25	1131.65	2558.12	809.931	3.01354	2.76029	2.03747	2.51091	1.81616	0.782366	2.14093	1.79965	4.06817	1.28803	1.25448	1.16696	0.882043	1.03245	0.816612	0.442938	0.978095	0.782989	1.79399	0.58845	0.67191	0.645773	0.733601	0.634277	0.641224	0.668287
1742.67	527.726	1153.84	623.847	2424.73	2266.31	1812.69	2109.3	1671.91	1021.75	1878.66	1660.76	3087.65	1339.98	1894.74	1736.31	1282.7	1579.31	1141.92	491.749	1348.67	1130.77	2557.66	809.982	3.01319	2.76125	2.03986	2.51156	1.81598	0.782025	2.14478	1.79825	4.06742	1.28811	1.25413	1.16792	0.884434	1.0331	0.816436	0.442598	0.981942	0.781585	1.79324	0.588531	0.671723	0.646303	0.735589	0.634679	0.641085	0.667774
1747.68	527.93	1156.85	626.853	2426.71	2264.47	1813.86	2110.5	1674.02	1022.83	1882.52	1661.2	3089.79	1341.33	1896.72	1734.48	1283.86	1580.5	1144.03	492.836	1352.53	1131.21	2559.8	811.333	3.01633	2.75833	2.04172	2.51346	1.81934	0.783754	2.15091	1.79895	4.07082	1.29026	1.25727	1.165	0.886286	1.035	0.81979	0.444326	0.988078	0.782289	1.79665	0.590679	0.673409	0.644688	0.73713	0.635846	0.643719	0.670382
1752.69	528.221	1154.5	624.5	2425.25	2265.88	1814.73	2107.45	1674.31	1021.3	1885.57	1661.72	3084.06	1339.98	1895.25	1735.88	1284.73	1577.46	1144.31	491.301	1355.57	1131.72	2554.06	809.984	3.01401	2.76056	2.0431	2.50862	1.81979	0.781313	2.15576	1.79977	4.0617	1.28811	1.25495	1.16723	0.887675	1.03016	0.820246	0.441885	0.992925	0.78311	1.78752	0.588534	0.672163	0.645922	0.738285	0.632871	0.644077	0.666699
1757.69	527.962	1152.45	622.455	2421.02	2266.27	1812.09	2108.03	1674.68	1022.33	1881.14	1660.81	3087.22	1339.68	1891.02	1736.27	1282.09	1578.04	1144.68	492.333	1351.14	1130.81	2557.22	809.685	3.00728	2.76118	2.03891	2.50954	1.82038	0.782954	2.14872	1.79832	4.06673	1.28764	1.24822	1.16785	0.883476	1.03108	0.820838	0.443526	0.985882	0.781656	1.79255	0.588059	0.66856	0.646265	0.734793	0.633436	0.644542	0.669175
1762.7	527.811	1153.13	623.13	2423.33	2266.1	1811.59	2103.87	1670.79	1021.45	1884.68	1661.74	3083.84	1340.05	1893.34	1736.1	1281.59	1573.87	1140.8	491.449	1354.68	1131.74	2553.84	810.051	3.01096	2.76091	2.0381	2.50291	1.8142	0.781548	2.15434	1.79981	4.06136	1.28822	1.2519	1.16758	0.882675	1.02445	0.814653	0.442121	0.991511	0.783141	1.78718	0.588641	0.670531	0.646118	0.734126	0.629366	0.639686	0.667054
1767.71	526.557	1153.78	623.787	2426.55	2265.9	1810.85	2105.77	1673.97	1021.1	1882.67	1660.35	3086.11	1340.4	1896.55	1735.91	1280.85	1575.78	1143.97	491.1	1352.67	1130.36	2556.11	810.405	3.01607	2.7606	2.03693	2.50594	1.81925	0.780993	2.15114	1.7976	4.06497	1.28878	1.25701	1.16727	0.881498	1.02748	0.819709	0.441566	0.988307	0.780933	1.79079	0.589204	0.67327	0.645944	0.733147	0.631228	0.643655	0.666216
1772.72	527.124	1154.2	624.204	2424.38	2264.45	1813.09	2106.89	1675.12	1023.51	1889.89	1663.43	3087.69	1340.33	1894.38	1734.45	1283.09	1576.9	1145.13	493.511	1359.89	1133.43	2557.69	810.335	3.01262	2.75828	2.04049	2.50773	1.82108	0.784827	2.16263	1.80249	4.06748	1.28867	1.25356	1.16495	0.88506	1.02927	0.821539	0.4454	0.999797	0.785823	1.7933	0.589092	0.671422	0.644662	0.73611	0.632324	0.645093	0.672001
1777.73	527.333	1151.47	621.47	2426.4	2268.7	1811.65	2108.99	1673.7	1022.38	1887.11	1663.27	3084.74	1340.9	1896.4	1738.7	1281.65	1578.99	1143.71	492.384	1357.12	1133.28	2554.74	810.905	3.01584	2.76504	2.0382	2.51106	1.81883	0.783035	2.15821	1.80224	4.06279	1.28958	1.25678	1.17172	0.882773	1.0326	0.819284	0.443608	0.995377	0.785578	1.78861	0.589999	0.673143	0.648405	0.734208	0.634373	0.643322	0.669297
1782.73	526.222	1152.69	622.698	2429.05	2267.87	1814.04	2113.7	1678.65	1022.88	1890.96	1665.48	3090.43	1343.16	1899.05	1737.88	1284.05	1583.7	1148.65	492.888	1360.97	1135.48	2560.43	813.159	3.02004	2.76373	2.04201	2.51855	1.82669	0.783837	2.16434	1.80575	4.07183	1.29316	1.26098	1.1704	0.88658	1.04009	0.827146	0.444409	1.0015	0.789083	1.79766	0.593583	0.675396	0.647679	0.737375	0.638973	0.649496	0.670506
1787.74	529.013	1154.32	624.327	2430.1	2268.13	1812.71	2111.73	1677.08	1023.99	1886.36	1666.07	3092.06	1342.75	1900.1	1738.13	1282.71	1581.73	1147.08	493.997	1356.36	1136.07	2562.06	812.75	3.02172	2.76413	2.03989	2.51542	1.8242	0.7856	2.15702	1.80668	4.07443	1.29251	1.26266	1.17081	0.884456	1.03696	0.82465	0.446173	0.994183	0.790021	1.80025	0.592933	0.676295	0.647901	0.735608	0.63705	0.647535	0.673167
1792.75	527.954	1151.74	621.745	2423.7	2264.49	1810.93	2107.2	1670.35	1020.7	1885.7	1661.46	3082.18	1338.53	1893.7	1734.49	1280.93	1577.2	1140.36	490.707	1355.71	1131.46	2552.19	808.529	3.01154	2.75835	2.03706	2.50822	1.8135	0.780368	2.15597	1.79936	4.05873	1.2858	1.25248	1.16502	0.881631	1.02975	0.813953	0.440941	0.99314	0.782693	1.78455	0.58622	0.670839	0.644702	0.733258	0.632623	0.639136	0.665273
1797.76	528.366	1151.09	621.091	2426.86	2268.41	1817.48	2108.37	1675.01	1022.36	1888.73	1664.35	3089.09	1342.89	1896.86	1738.42	1287.48	1578.37	1145.01	492.361	1358.73	1134.35	2559.1	812.895	3.01657	2.76459	2.04747	2.51008	1.8209	0.782999	2.16078	1.80395	4.06971	1.29274	1.25751	1.17126	0.892042	1.03162	0.821353	0.443571	0.997946	0.787283	1.79553	0.593163	0.673535	0.648153	0.741917	0.633767	0.644947	0.669242
1802.76	528.587	1150.4	620.4	2426.45	2265.38	1816.38	2109.45	1674.38	1022.72	1886.52	1663.22	3087.48	1340.24	1896.46	1735.38	1286.38	1579.45	1144.38	492.721	1356.52	1133.23	2557.49	810.24	3.01592	2.75976	2.04572	2.51179	1.8199	0.783571	2.15726	1.80216	4.06715	1.28852	1.25686	1.16643	0.890289	1.03333	0.820357	0.444143	0.994429	0.785498	1.79297	0.588941	0.673188	0.645482	0.740459	0.634819	0.644165	0.670106
1807.77	528.492	1156.1	626.105	2426.62	2269.7	1814.39	2111.47	1677.37	1024.41	1887.16	1663.63	3091.13	1342.22	1896.63	1739.7	1284.4	1581.47	1147.37	494.416	1357.16	1133.64	2561.13	812.222	3.01619	2.76664	2.04256	2.515	1.82465	0.786267	2.15828	1.80282	4.07295	1.29167	1.25713	1.17331	0.887135	1.03654	0.825108	0.446839	0.99545	0.786153	1.79877	0.592093	0.673333	0.649287	0.737836	0.636792	0.647895	0.674173
	529.997		628.815																					1.75906	1.59333	1.15543	1.47846	0.999546	0.339428	1.16283	1.01666	2.27418	0.699578	1.86703	1.80707	1.20235	1.62775	1.27352	0.662796	1.45331	1.17337	2.72667	0.938381
	529.997		628.815
[truncated: 4 more columns]

## Sheet: cc
				FRAP										FRAP-back										FRAP/(un-b)										x-min										x/max
time	back	unbleach	un-back	1	2	3	4	5	6	7	8	9	10	1	2	3	4	5	6	7	8	9	10	1	2	3	4	5	6	7	8	9	10	1	2	3	4	5	6	7	8	9	10	1	2	3	4	5	6
0	103.104	3530.24	3399.37	3600.47	2511.53	2299.12	1700.22	4095	4095	4095	4095			3469.6	2380.66	2168.26	1569.35	3964.13	3964.13	3964.13	3964.13			1.02203	0.701267	0.638699	0.46228	1.16771	1.16771	1.16771	1.16771			0.878798	0.529996	0.37323	0.352871	0.808299	0.773858	0.880159	0.816749			1	1	1	1	1	1
5.003	131.13	3491.7	3360.83	643.5	760.15	1038.65	502.292	1416.15	1689.74	1973.47	1496.87			512.631	629.281	907.777	371.422	1285.28	1558.87	1842.6	1366			0.151005	0.185366	0.267402	0.109409	0.378603	0.459193	0.54277	0.402379			0.00776923	0.0140951	0.00193325	-4.57967e-16	0.0191958	0.0653449	0.255224	0.0514218			0.00884075	0.0265947	0.00517978	-1.29783e-15	0.0237484	0.0844404
10.005	131.481	3505.59	3374.72	636.062	725.817	1032.94	516.354	1369.36	1669.57	1570.03	1479.3			505.193	594.948	902.069	385.485	1238.49	1538.7	1439.16	1348.43			0.148814	0.175253	0.265721	0.113551	0.364821	0.453252	0.423931	0.397204			0.00557823	0.00398167	0.000251856	0.00414236	0.00541386	0.0594043	0.136385	0.0462472			0.00634758	0.00751265	0.0006748	0.011739	0.00669785	0.0767639
15.008	131.377	3546.91	3416.04	617.125	759.25	1089.75	508.052	1485.7	1632.21	1415.2	1454.17			486.256	628.381	958.881	377.183	1354.83	1501.34	1284.33	1323.3			0.143235	0.185101	0.282456	0.111106	0.399089	0.442248	0.378323	0.389801			2.77556e-16	0.01383	0.0169868	0.00169683	0.0396818	0.0484002	0.0907761	0.0388438			3.15836e-16	0.0260945	0.0455131	0.00480864	0.049093	0.062544
20.011	131.351	3579.92	3449.05	634.844	748.467	1062.54	524.354	1391.32	1673.64	2178.73	1486			503.975	617.598	931.673	393.485	1260.45	1542.77	2047.86	1355.13			0.148455	0.181924	0.274441	0.115908	0.371288	0.454452	0.603235	0.399178			0.00521945	0.0106536	0.00897225	0.00649891	0.0118808	0.0606038	0.315688	0.0482208			0.00593931	0.0201013	0.0240395	0.0184172	0.0146985	0.0783139
25.013	130.117	3566.56	3435.69	653.625	765.733	1061.65	530.948	1437.36	1621.19	1634.8	1439.9			522.756	634.864	930.777	400.079	1306.49	1490.32	1503.93	1309.03			0.153987	0.18701	0.274177	0.11785	0.384851	0.439001	0.44301	0.385598			0.0107517	0.0157396	0.00870831	0.0084412	0.0254445	0.0451528	0.155463	0.0346412			0.0122346	0.0296977	0.0233323	0.0239215	0.0314791	0.0583477
30.016	131.104	3564.16	3433.29	648.5	771.283	1078.98	525.865	1458.52	1592.19	1700.37	1426.43			517.631	640.414	948.11	394.995	1327.65	1461.32	1569.5	1295.56			0.152477	0.188645	0.279283	0.116353	0.391082	0.430458	0.462324	0.381632			0.00924207	0.0173745	0.0138141	0.00694382	0.0316749	0.0366104	0.174777	0.0306742			0.0105167	0.0327823	0.0370122	0.0196781	0.0391871	0.0473089
35.019	130.429	3582.46	3451.59	661.438	785.967	1076.65	537.698	1415.29	1612.05	1695.4	1441.33			530.569	655.098	945.777	406.829	1284.42	1481.18	1564.53	1310.46			0.156289	0.192971	0.278595	0.119839	0.378349	0.436308	0.460861	0.386021			0.0130532	0.0216999	0.0131268	0.0104295	0.0189416	0.0424599	0.173314	0.0350633			0.0148535	0.0409436	0.0351709	0.0295562	0.0234339	0.0548678
40.022	131.195	3550.62	3419.75	668.188	825.117	1070.48	539	1407.85	1567.79	1782.03	1401.27			537.319	694.248	939.61	408.131	1276.98	1436.92	1651.16	1270.4			0.158277	0.204503	0.276779	0.120222	0.376157	0.42327	0.48638	0.374218			0.0150415	0.0332323	0.0113102	0.0108131	0.0167503	0.0294217	0.198833	0.0232611			0.017116	0.0627028	0.0303037	0.0306432	0.0207229	0.0380196
45.024	132.117	3526.6	3395.73	664.469	788.317	1074.85	538.156	1469.79	1613.95	1765.4	1436.23			533.6	657.448	943.985	407.287	1338.92	1483.08	1634.53	1305.36			0.157181	0.193663	0.278068	0.119974	0.394403	0.436869	0.48148	0.384518			0.013946	0.0223922	0.012599	0.0105645	0.0349956	0.0430208	0.193934	0.033561			0.0158694	0.0422497	0.0337566	0.0299388	0.0432953	0.0555926
50.027	132.338	3489.09	3358.23	675.125	767.483	1047.65	539.188	1378.18	1573.69	1968.83	1420.87			544.256	636.614	916.777	408.318	1247.31	1442.82	1837.96	1290			0.16032	0.187526	0.270053	0.120277	0.367418	0.425009	0.541405	0.379992			0.0170849	0.0162551	0.00458436	0.0108683	0.00801136	0.0311609	0.253859	0.0290347			0.0194413	0.0306703	0.0122829	0.0307997	0.00991139	0.0402669
55.03	131.325	3509.38	3378.51	654.125	814.633	1035.52	538.365	1459.08	1630.5	1927.73	1459			523.256	683.764	904.652	407.495	1328.21	1499.63	1796.86	1328.13			0.154134	0.201415	0.266481	0.120035	0.391247	0.441743	0.529298	0.391225			0.010899	0.030144	0.00101272	0.0106259	0.0318401	0.0478953	0.241752	0.0402674			0.0124022	0.0568759	0.00271341	0.0301127	0.0393915	0.0618916
60.032	131.039	3543.09	3412.23	654.812	770.583	1067.58	533.969	1463.55	1594.83	1777.17	1433.17			523.943	639.714	936.714	403.099	1332.68	1463.96	1646.3	1302.3			0.154337	0.188439	0.275926	0.11874	0.392564	0.431237	0.484947	0.383615			0.0111014	0.0171683	0.0104572	0.00933106	0.0331566	0.0373889	0.1974	0.0326579			0.0126325	0.0323932	0.028018	0.0264432	0.0410202	0.048315
65.035	130.74	3557.78	3426.91	670.906	797.283	1045.71	550.531	1381.09	1467.9	1975.1	1322.3			540.037	666.414	914.839	419.662	1250.22	1337.04	1844.23	1191.43			0.159077	0.196304	0.269482	0.123619	0.368275	0.393848	0.543251	0.350957			0.0158422	0.0250333	0.00401349	0.0142098	0.00886826	0	0.255705	0			0.0180271	0.0472329	0.0107534	0.0402691	0.0109715	0
70.038	131.377	3546.09	3415.23	649.094	788.017	1032.38	542.875	1432.8	1485.69	2015.37	1338.2			518.225	657.148	901.506	412.006	1301.93	1354.82	1884.5	1207.33			0.152652	0.193575	0.265555	0.121364	0.383508	0.399087	0.555113	0.355641			0.00941704	0.0223038	8.60138e-05	0.0119545	0.024101	0.00523889	0.267566	0.00468363			0.0107158	0.0420829	0.000230458	0.0338779	0.0298169	0.00676984
75.04	132	3546.41	3415.54	653.438	785.583	1037.25	539.542	1375.47	1519.19	2077.63	1360			522.569	654.714	906.381	408.672	1244.6	1388.32	1946.76	1229.13			0.153932	0.192858	0.266991	0.120382	0.366619	0.408955	0.573454	0.362062			0.0106966	0.0215868	0.00152203	0.0109727	0.0072125	0.0151069	0.285908	0.0111052			0.0121719	0.0407301	0.004078	0.0310954	0.00892306	0.0195216
80.043	131.61	3527.32	3396.45	651.062	739.733	1049.06	538.417	1394.17	1590.86	2006.07	1423.53			520.193	608.864	918.193	407.547	1263.3	1459.99	1875.2	1292.66			0.153232	0.179352	0.27047	0.12005	0.372127	0.430066	0.552373	0.380777			0.00999675	0.00808088	0.00500147	0.0106413	0.01272	0.0362177	0.264827	0.02982			0.0113755	0.0152471	0.0134005	0.0301562	0.0157368	0.0468015
85.046	130.766	3524.09	3393.23	641.812	754.233	1043.65	538.385	1429.98	1530.5	1855.03	1375.9			510.943	623.364	912.777	407.516	1299.12	1399.63	1724.16	1245.03			0.150507	0.183623	0.268875	0.120041	0.382678	0.412286	0.507883	0.366746			0.007272	0.0123521	0.00340609	0.010632	0.0232709	0.0184385	0.220337	0.0157888			0.00827494	0.023306	0.00912598	0.0301301	0.0287899	0.0238267
90.049	130.312	3533.36	3402.5	645.188	725.783	1076.96	534.01	1410.09	1625.83	1804.7	1441.3			514.319	594.914	946.089	403.141	1279.22	1494.96	1673.83	1310.43			0.151502	0.175242	0.278687	0.118752	0.376818	0.440368	0.493057	0.386011			0.00826646	0.00397166	0.0132187	0.00934331	0.0174107	0.0465205	0.20551	0.0350536			0.00940656	0.00749375	0.0354171	0.026478	0.02154	0.0601151
95.051	131	3539.75	3408.88	661.688	761.85	1065.65	533.917	1416.61	1551.93	1764.7	1395.7			530.819	630.981	934.777	403.047	1285.74	1421.06	1633.83	1264.83			0.156362	0.185867	0.275355	0.118725	0.378737	0.418599	0.481274	0.372579			0.0131268	0.0145958	0.00988658	0.00931571	0.0193298	0.0247508	0.193728	0.0216213			0.0149373	0.0275395	0.0264893	0.0263997	0.0239142	0.0319836
100.054	131.792	3541.4	3410.53	675.375	813.05	1096.25	538.146	1350.98	1489.86	1596.6	1345.4			544.506	682.181	965.381	407.276	1220.12	1358.99	1465.73	1214.53			0.160394	0.200949	0.28437	0.119971	0.359407	0.400314	0.431757	0.357762			0.0171586	0.0296777	0.0189015	0.0105615	0	0.00646636	0.144211	0.00680452			0.0195251	0.0559961	0.0506432	0.0299301	0	0.008356
105.057	130.883	3531.27	3400.4	671.156	768.983	1054.17	543.385	1438.24	1683.05	1953.6	1493.57			540.287	638.114	923.298	412.516	1307.37	1552.18	1822.73	1362.7			0.159151	0.187968	0.271974	0.121514	0.38511	0.457222	0.536918	0.401407			0.0159158	0.016697	0.00650524	0.0121049	0.0257031	0.0633742	0.249372	0.0504498			0.0181109	0.031504	0.0174296	0.034304	0.031799	0.0818939
110.059	129.909	3512.22	3381.35	678.25	763.317	1064.4	546.521	1461.5	1604.71	1493.2	1438.6			547.381	632.448	933.527	415.651	1330.63	1473.84	1362.33	1307.73			0.161241	0.186299	0.274987	0.122438	0.391961	0.434147	0.401299	0.385216			0.0180055	0.015028	0.00951837	0.0130285	0.0325542	0.0402995	0.113752	0.0342583			0.0204888	0.0283549	0.0255027	0.0369213	0.0402749	0.0520762
115.062	131.688	3551.6	3420.73	675.281	776.05	1050.92	541.552	1444.58	1566.69	1664	1393.53			544.412	645.181	920.048	410.683	1313.71	1435.82	1533.13	1262.66			0.160366	0.19005	0.271017	0.120974	0.386976	0.422947	0.451611	0.37194			0.0171309	0.0187787	0.00554789	0.0115649	0.0275689	0.0290989	0.164065	0.020983			0.0194936	0.0354318	0.0148645	0.0327736	0.0341073	0.0376024
120.065	131.312	3526.49	3395.62	670.062	793.933	1058.98	542.24	1408.61	1578.36	1635.8	1408.53			539.193	663.064	928.11	411.37	1277.74	1447.49	1504.93	1277.66			0.158829	0.195317	0.273391	0.121176	0.37638	0.426383	0.443304	0.376359			0.0155935	0.0240465	0.0079227	0.0117674	0.0169733	0.0325356	0.155758	0.0254015			0.0177442	0.045371	0.0212274	0.0333475	0.0209988	0.0420434
125.067	129.74	3519.94	3389.07	659.719	780.8	1068.85	546.531	1422.64	1522.14	1663.67	1365.27			528.85	649.931	937.985	415.662	1291.77	1391.27	1532.8	1234.4			0.155782	0.191449	0.2763	0.122441	0.380513	0.409825	0.451513	0.363614			0.0125468	0.0201779	0.0108316	0.0130315	0.0211061	0.0159768	0.163967	0.0126567			0.0142773	0.0380718	0.0290211	0.03693	0.0261117	0.0206456
130.07	131.039	3520.18	3389.31	675.062	802.2	1042.17	540.052	1406.17	1575.31	1657.1	1402.43			544.193	671.331	911.298	409.183	1275.3	1444.44	1526.23	1271.56			0.160302	0.197752	0.268439	0.120532	0.375662	0.425486	0.449579	0.374562			0.0170664	0.0264817	0.00297042	0.011123	0.0162548	0.0316381	0.162032	0.0236046			0.0194202	0.0499657	0.00795869	0.0315214	0.0201099	0.0408836
135.073	130.675	3524.51	3393.64	665.781	742.383	1078.04	539.583	1405.2	1518.21	1696.27	1353.77			534.912	611.514	947.173	408.714	1274.33	1387.34	1565.4	1222.9			0.157568	0.180132	0.279007	0.120394	0.375376	0.408667	0.461116	0.360226			0.0143325	0.00886149	0.013538	0.0109849	0.0159691	0.0148194	0.173569	0.00926917			0.0163092	0.0167199	0.0362727	0.0311301	0.0197565	0.01915
140.076	130.364	3521.35	3390.48	665.312	772.817	1052.62	543.802	1416.61	1567.24	1665.2	1393.6			534.443	641.948	921.756	412.933	1285.74	1436.37	1534.33	1262.73			0.15743	0.189097	0.27152	0.121637	0.378737	0.423108	0.451965	0.37196			0.0141943	0.0178264	0.00605101	0.0122276	0.0193298	0.0292603	0.164418	0.0210027			0.016152	0.0336349	0.0162126	0.0346518	0.0239142	0.037811
145.078	130.247	3527.05	3396.18	673.531	804.767	1083.02	539.688	1413.52	1527.43	1835.07	1361.73			542.662	673.898	952.152	408.818	1282.65	1396.56	1704.2	1230.86			0.159851	0.198509	0.280473	0.120425	0.377826	0.411382	0.502002	0.362573			0.0166154	0.0272378	0.0150047	0.0110156	0.0184193	0.0175339	0.214455	0.0116157			0.018907	0.0513925	0.0402023	0.0312171	0.0227878	0.0226577
150.081	131.403	3515.48	3384.61	672.844	747.45	1077.38	541.99	1359.94	1576.4	2117	1409.43			541.975	616.581	946.506	411.12	1229.07	1445.54	1986.13	1278.56			0.159648	0.181625	0.27881	0.121103	0.362045	0.425808	0.58505	0.376624			0.016413	0.0103541	0.0133416	0.0116937	0.00263756	0.0319606	0.297504	0.0256666			0.0186767	0.0195361	0.0357462	0.0331388	0.0032631	0.0413004
155.084	131.597	3510.54	3379.67	652.281	724.417	1073.65	538.729	1447.48	1551.45	1855.6	1375.67			521.412	593.548	942.777	407.86	1316.62	1420.58	1724.73	1244.8			0.153591	0.17484	0.277712	0.120142	0.387833	0.418458	0.50805	0.366677			0.0103558	0.00356928	0.0122431	0.0107333	0.0284258	0.0246103	0.220504	0.0157202			0.0117841	0.00673454	0.0328032	0.0304171	0.0351674	0.031802
160.086	130.987	3531.06	3400.19	661.031	712.3	1057.12	538.604	1433.62	1468.55	1828.07	1328.6			530.162	581.431	926.256	407.735	1302.75	1337.68	1697.2	1197.73			0.156169	0.171271	0.272845	0.120106	0.383749	0.394037	0.49994	0.352813			0.0129333	0	0.00737657	0.0106965	0.0243419	0.000189407	0.212394	0.00185578			0.014717	0	0.0197641	0.0303127	0.030115	0.000244757
165.089	130.688	3543.79	3412.92	666.75	728.967	1077.5	542.302	1409.39	1623.95	1678.67	1448.07			535.881	598.098	946.631	411.433	1278.52	1493.08	1547.8	1317.2			0.157853	0.17618	0.278847	0.121195	0.376612	0.439814	0.455932	0.388004			0.0146179	0.00490956	0.0133784	0.0117858	0.0172054	0.0459664	0.168385	0.0370469			0.016634	0.00926339	0.0358449	0.0333997	0.021286	0.0593991
170.092	130.468	3526.06	3395.19	661.156	766.533	1064.79	538.635	1412.88	1605.76	2009.37	1436.6			530.287	635.664	933.923	407.766	1282.01	1474.89	1878.5	1305.73			0.156205	0.187246	0.275104	0.120115	0.377639	0.434456	0.553345	0.384626			0.0129701	0.0159753	0.00963502	0.0107057	0.018232	0.0406083	0.265799	0.0336691			0.0147589	0.0301423	0.0258152	0.0303388	0.022556	0.0524751
175.094	130.779	3531.03	3400.16	654.594	732.283	1043.27	534.844	1466.42	1612.62	1851.93	1431.67			523.725	601.414	912.402	403.974	1335.55	1481.75	1721.06	1300.8			0.154272	0.177157	0.268764	0.118998	0.393412	0.436476	0.50697	0.383173			0.0110372	0.00588635	0.00329563	0.00958881	0.0340046	0.0426281	0.219424	0.032216			0.0125594	0.0111064	0.00883002	0.0271737	0.0420694	0.0550852
180.097	130.519	3503.56	3372.69	650.562	765.933	1053.17	544.458	1417.05	1645.76	2081.5	1465.93			519.693	635.064	922.298	413.589	1286.18	1514.89	1950.63	1335.06			0.153085	0.187069	0.271679	0.12183	0.378866	0.446239	0.574593	0.393267			0.00984947	0.0157986	0.00621067	0.0124209	0.0194592	0.052391	0.287047	0.0423097			0.0112079	0.0298088	0.0166403	0.0351996	0.0240742	0.067701
185.1	130.987	3537.59	3406.72	649.594	796.55	1079.17	536.292	1415.18	1583.98	1861.67	1421.7			518.725	665.681	948.298	405.422	1284.31	1453.11	1730.8	1290.83			0.1528	0.196088	0.279338	0.119424	0.378317	0.428039	0.509838	0.380237			0.00956433	0.0248173	0.0138694	0.0100153	0.0189104	0.0341908	0.222291	0.0292801			0.0108834	0.0468255	0.0371606	0.0283823	0.0233953	0.0441823
190.102	130.39	3521.36	3390.5	646.031	766.133	1074.23	540.146	1402.76	1536.9	1869.57	1377.53			515.162	635.264	943.36	409.276	1271.89	1406.04	1738.7	1246.66			0.15175	0.187128	0.277884	0.12056	0.374658	0.414173	0.512165	0.367227			0.00851478	0.0158575	0.0124149	0.0111506	0.0152507	0.0203252	0.224618	0.0162699			0.00968913	0.02992	0.0332633	0.0315996	0.0188676	0.0262648
195.105	130.961	3516.13	3385.26	676.062	815.817	1061.81	543.656	1419.73	1528.26	1968.6	1369.53			545.193	684.948	930.943	412.787	1288.86	1397.39	1837.73	1238.66			0.160596	0.201764	0.274226	0.121594	0.379656	0.411627	0.541337	0.364871			0.017361	0.0304928	0.00875721	0.0121847	0.0202492	0.0177792	0.25379	0.0139133			0.0197553	0.057534	0.0234633	0.03453	0.0250516	0.0229748
200.108	130.442	3519.09	3388.23	674.812	773.083	1075.23	546.438	1404.18	1514.05	1750.93	1360.1			543.943	642.214	944.36	415.568	1273.31	1383.18	1620.06	1229.23			0.160228	0.189176	0.278178	0.122413	0.375077	0.40744	0.477219	0.362092			0.0169927	0.0179047	0.0127094	0.0130039	0.0156701	0.0135922	0.189672	0.0111347			0.0193364	0.0337827	0.0340525	0.0368518	0.0193866	0.0175643
205.111	130.442	3518.35	3387.48	656.094	761.333	1079.44	546.562	1425.32	1558.81	1872.57	1386.7			525.225	630.464	948.569	415.693	1294.45	1427.94	1741.7	1255.83			0.154714	0.185714	0.279418	0.12245	0.381303	0.420626	0.513048	0.369927			0.011479	0.0144436	0.0139493	0.0130408	0.0218961	0.0267777	0.225502	0.0189702			0.0130622	0.0272522	0.0373745	0.0369561	0.0270891	0.0346029
210.113	130.675	3536.19	3405.32	649.031	777.283	1059.56	546.781	1428.8	1531.55	2245.1	1373.97			518.162	646.414	928.693	415.912	1297.93	1400.68	2114.23	1243.1			0.152634	0.190413	0.273563	0.122514	0.38233	0.412595	0.622785	0.366177			0.00939849	0.0191419	0.00809443	0.0131052	0.0229227	0.0187472	0.335238	0.0152194			0.0106947	0.0361171	0.0216875	0.0371387	0.0283592	0.0242256
215.116	131.091	3526.38	3395.51	657.25	801.583	1065.21	549.177	1466.5	1527.98	1981.23	1358.57			526.381	670.714	934.339	418.308	1335.63	1397.11	1850.36	1227.7			0.155055	0.197571	0.275226	0.12322	0.393434	0.411543	0.545058	0.36164			0.0118195	0.0262999	0.00975756	0.0138109	0.034027	0.017695	0.257511	0.0106831			0.0134497	0.0496228	0.0261436	0.0391387	0.0420971	0.0228659
220.119	131.532	3540.68	3409.81	666.812	748.733	1070.62	546.927	1412.29	1591.5	2051.03	1413.03			535.943	617.864	939.756	416.058	1281.42	1460.63	1920.16	1282.16			0.157872	0.182003	0.276822	0.122557	0.377465	0.430255	0.565619	0.377684			0.0146362	0.010732	0.0113532	0.0131482	0.0180579	0.0364071	0.278072	0.026727			0.0166548	0.0202492	0.0304189	0.0372605	0.0223406	0.0470463
225.121	130.636	3499.41	3368.54	674.906	794.367	1053.65	553.042	1413.02	1547.86	1996.53	1391.4			544.037	663.498	922.777	422.172	1282.15	1416.99	1865.66	1260.53			0.160256	0.195445	0.27182	0.124358	0.377679	0.417399	0.549565	0.371312			0.0170204	0.0241743	0.00635177	0.0149493	0.018272	0.0235513	0.262018	0.0203546			0.0193679	0.0456122	0.0170184	0.0423648	0.0226056	0.0304336
230.124	130.221	3529.51	3398.64	661.719	769.517	1070.75	554.667	1487.7	1611.67	1789.9	1429.63			530.85	638.648	939.881	423.797	1356.83	1480.8	1659.03	1298.76			0.156371	0.188125	0.276859	0.124837	0.399678	0.436196	0.488697	0.382574			0.013136	0.0168543	0.0113901	0.015428	0.040271	0.0423477	0.201151	0.0316169			0.0149477	0.0318008	0.0305175	0.0437213	0.0498219	0.0547228
235.127	131.078	3534.76	3403.89	663.281	800.3	1076.06	557.979	1437.39	1683.17	1891.3	1503.83			532.412	669.431	945.193	427.11	1306.52	1552.3	1760.43	1372.96			0.156831	0.197193	0.278423	0.125813	0.38486	0.457257	0.518566	0.404431			0.0135961	0.025922	0.0129548	0.0164038	0.0254533	0.0634093	0.23102	0.0534738			0.0154712	0.0489097	0.03471	0.0464865	0.03149	0.0819392
240.129	130.649	3532.98	3402.11	678.031	776.883	1086.21	554.469	1444.77	1572.07	1964.77	1405.83			547.162	646.014	955.339	423.599	1313.9	1441.2	1833.9	1274.96			0.161176	0.190295	0.281412	0.124779	0.387034	0.424532	0.540207	0.375563			0.017941	0.0190241	0.0159435	0.0153697	0.0276269	0.030684	0.252661	0.0246061			0.0204153	0.0358947	0.0427176	0.0435561	0.0341791	0.0396506
245.132	130.506	3535.62	3404.75	678.938	737.717	1085.75	553.406	1415.44	1563.5	1877.57	1398.33			548.069	606.848	954.881	422.537	1284.57	1432.63	1746.7	1267.46			0.161443	0.178758	0.281277	0.124466	0.378393	0.422007	0.514521	0.373354			0.0182081	0.00748703	0.0158086	0.0150567	0.0189861	0.0281592	0.226975	0.0223969			0.0207194	0.0141266	0.0423561	0.0426691	0.0234889	0.0363881
250.135	130.935	3558.73	3427.86	673.281	749.617	1058.17	548.542	1456.33	1528.07	2125.3	1372.77			542.412	618.748	927.298	417.672	1325.46	1397.2	1994.43	1241.9			0.159777	0.182263	0.273152	0.123033	0.390439	0.411571	0.587495	0.365823			0.0165418	0.0109924	0.00768351	0.0136238	0.0310321	0.017723	0.299949	0.014866			0.0188232	0.0207405	0.0205865	0.0386083	0.0383919	0.0229021
255.138	131.156	3573.38	3442.51	671.312	811.917	1050.35	550.021	1452.8	1606.02	1947.43	1426.37			540.443	681.048	919.485	419.151	1321.93	1475.15	1816.56	1295.5			0.159197	0.200615	0.270851	0.123469	0.389399	0.434533	0.535101	0.381612			0.0159618	0.029344	0.00538205	0.0140595	0.0299923	0.0406854	0.247555	0.0306548			0.0181632	0.0553664	0.0144202	0.039843	0.0371055	0.0525748
260.14	131.546	3550.92	3420.05	679.344	732.283	1053.69	551.781	1454.68	1622.86	1933.2	1437.27			548.475	601.414	922.819	420.912	1323.81	1491.99	1802.33	1306.4			0.161563	0.177157	0.271833	0.123987	0.389953	0.439492	0.530909	0.384823			0.0183277	0.00588635	0.00636414	0.014578	0.0305458	0.0456439	0.243362	0.0338656			0.0208555	0.0111064	0.0170515	0.0413126	0.0377902	0.0589823
265.143	130.857	3514.36	3383.5	682.281	794.083	1050.48	546.333	1464.7	1568.02	1912.93	1403.3			551.412	663.214	919.61	415.464	1333.83	1437.15	1782.06	1272.43			0.162428	0.195361	0.270888	0.122382	0.392903	0.42334	0.524939	0.374817			0.0191929	0.0240907	0.00541887	0.0129732	0.0334959	0.0294918	0.237392	0.02386			0.0218399	0.0454544	0.0145189	0.0367648	0.04144	0.0381102
270.146	132.156	3551.05	3420.18	684.594	789.667	1046.83	556.833	1424.62	1560.38	1434.57	1382.43			553.725	658.798	915.964	425.964	1293.75	1429.51	1303.7	1251.56			0.16311	0.194061	0.269814	0.125475	0.381098	0.421088	0.384028	0.368671			0.0198742	0.0227898	0.00434488	0.0160662	0.0216908	0.0272405	0.096481	0.0177133			0.0226152	0.043	0.0116413	0.0455299	0.0268351	0.0352009
275.148	130.701	3523.56	3392.69	682.812	765.3	1079.71	554.24	1477.94	1531.74	1657.9	1358.37			551.943	634.431	948.839	423.37	1347.07	1400.87	1527.03	1227.5			0.162585	0.186883	0.279497	0.124711	0.396804	0.412651	0.449814	0.361581			0.0193493	0.0156121	0.0140288	0.0153022	0.0373966	0.0188032	0.162268	0.0106242			0.0220179	0.029457	0.0375875	0.0433648	0.0462658	0.0242979
280.151	130.442	3558.97	3428.1	671.281	790.717	1082.9	559.385	1457.45	1523.05	2025.43	1360.27			540.412	659.848	952.027	428.516	1326.59	1392.18	1894.56	1229.4			0.159188	0.19437	0.280437	0.126227	0.39077	0.410091	0.558078	0.362141			0.0159526	0.0230991	0.0149679	0.016818	0.0313626	0.0162434	0.270531	0.0111839			0.0181528	0.0435836	0.0401036	0.0476604	0.0388008	0.0209901
285.154	131.416	3570.49	3439.62	676.125	790.65	1080.65	557.792	1500.61	1549.62	1907.2	1376.2			545.256	659.781	949.777	426.922	1369.74	1418.75	1776.33	1245.33			0.160615	0.19435	0.279774	0.125758	0.403481	0.417918	0.52325	0.366834			0.0173795	0.0230794	0.0143051	0.0163485	0.0440736	0.0240703	0.235704	0.0158772			0.0197765	0.0435463	0.0383279	0.04633	0.0545263	0.0311043
290.156	130.961	3560.71	3429.84	660.438	759.383	1058.56	552.24	1521.91	1658.17	2390.63	1460.33			529.569	628.514	927.693	421.37	1391.04	1527.3	2259.76	1329.46			0.155994	0.18514	0.273269	0.124122	0.409756	0.449893	0.665654	0.391617			0.0127586	0.0138691	0.00779986	0.0147131	0.0503487	0.0560451	0.378107	0.0406601			0.0145183	0.0261684	0.0208983	0.0416952	0.0622897	0.072423
295.159	131.156	3561.3	3430.43	673.969	760.217	1097.46	555.979	1452.11	1519.17	1764.33	1354.47			543.1	629.348	966.589	425.11	1321.24	1388.3	1633.46	1223.6			0.15998	0.185386	0.284726	0.125224	0.389194	0.408948	0.481166	0.360433			0.0167444	0.0141148	0.0192574	0.0158146	0.029787	0.0151001	0.19362	0.00947537			0.0190538	0.0266319	0.0515966	0.044817	0.0368515	0.0195128
300.162	131.169	3555.6	3424.73	660.438	747.367	1043.62	545.5	1469.61	1557.71	2090.4	1389.53			529.569	616.498	912.756	414.631	1338.74	1426.84	1959.53	1258.66			0.155994	0.1816	0.268869	0.122137	0.394349	0.420303	0.577215	0.370762			0.0127586	0.0103296	0.0033999	0.0127278	0.0349419	0.0264549	0.289668	0.0198047			0.0145183	0.01949	0.00910941	0.0360692	0.043229	0.0341857
305.165	129.688	3556.44	3425.57	644.438	763.217	1094.65	537.854	1495.5	1614.26	2154.47	1435.6			513.569	632.348	963.777	406.985	1364.63	1483.39	2023.6	1304.73			0.151281	0.186269	0.283898	0.119885	0.401976	0.43696	0.596087	0.384332			0.00804553	0.0149985	0.0184291	0.0104756	0.0425695	0.0431121	0.30854	0.0333745			0.00915516	0.0282993	0.0493772	0.0296867	0.0526655	0.0557106
310.167	131.052	3586.35	3455.48	656.812	727.267	1041.08	545.479	1519.29	1628.76	1904.17	1442.3			525.943	596.398	910.214	414.61	1388.42	1497.89	1773.3	1311.43			0.154926	0.17568	0.26812	0.122131	0.408984	0.441231	0.522357	0.386305			0.0116905	0.0044088	0.00265111	0.0127217	0.0495767	0.0473833	0.23481	0.0353482			0.0133029	0.00831854	0.00710316	0.0360518	0.0613346	0.06123
315.17	131.117	3560.4	3429.53	660.219	726.133	1093.56	549.396	1460.71	1534.76	1704.07	1360.97			529.35	595.264	962.693	418.526	1329.84	1403.89	1573.2	1230.1			0.155929	0.175346	0.283578	0.123284	0.391729	0.413542	0.463414	0.362347			0.0126941	0.00407476	0.0181097	0.0138754	0.0323221	0.0196939	0.175867	0.0113901			0.0144449	0.00768828	0.0485217	0.0393213	0.0399878	0.025449
320.173	130.766	3532.06	3401.19	670	753.283	1074.83	545.615	1405.71	1542.74	1429.2	1367.4			539.131	622.414	943.964	414.745	1274.84	1411.87	1298.33	1236.53			0.158811	0.183343	0.278061	0.122171	0.375528	0.415891	0.382447	0.364242			0.0155753	0.0120723	0.0125928	0.0127615	0.0161208	0.0220434	0.0949001	0.013285			0.0177234	0.022778	0.03374	0.0361649	0.0199441	0.0284851
325.175	131.117	3515.35	3384.48	665.5	760.933	1043.5	552.719	1425.06	1601.26	1594.23	1429.3			534.631	630.064	912.631	421.849	1294.19	1470.39	1463.36	1298.43			0.157485	0.185597	0.268832	0.124263	0.381227	0.433131	0.43106	0.382476			0.0142497	0.0143257	0.00336308	0.0148542	0.0218204	0.0392827	0.143514	0.0315188			0.016215	0.0270299	0.00901075	0.0420953	0.0269955	0.0507622
330.178	130.506	3537	3406.13	655.594	798.933	1084.6	555.552	1485.24	1621.17	2043.37	1439.97			524.725	668.064	953.735	424.683	1354.37	1490.3	1912.5	1309.1			0.154567	0.19679	0.28094	0.125098	0.398955	0.438994	0.563361	0.385618			0.0113317	0.0255193	0.015471	0.0156888	0.0395478	0.0451461	0.275814	0.0346609			0.0128946	0.04815	0.0414517	0.0444604	0.0489272	0.058339
335.181	130.792	3547.27	3416.4	665.25	757.75	1054.77	557.781	1448.62	1624.71	1821	1446.13			534.381	626.881	923.902	426.912	1317.75	1493.84	1690.13	1315.26			0.157411	0.184659	0.272152	0.125755	0.388167	0.440039	0.497858	0.387435			0.0141761	0.0133881	0.00668316	0.0163454	0.0287604	0.0461909	0.210312	0.0364772			0.0161312	0.0252608	0.0179063	0.0463212	0.0355814	0.0596891
340.183	130.519	3541.05	3410.18	664.312	767.083	1079.96	549.698	1478.68	1635.67	1979.83	1440.67			533.443	636.214	949.089	418.829	1347.81	1504.8	1848.96	1309.8			0.157135	0.187408	0.279571	0.123373	0.397022	0.443265	0.544645	0.385824			0.0138998	0.0161373	0.0141024	0.0139643	0.0376154	0.0494173	0.257099	0.0348671			0.0158168	0.030448	0.0377849	0.0395735	0.0465366	0.0638584
345.186	131.532	3530.32	3399.45	660.188	725.917	1083.02	542.479	1442.97	1609.81	1471.4	1421.87			529.319	595.048	952.152	411.61	1312.1	1478.94	1340.53	1291			0.15592	0.175282	0.280473	0.121247	0.386503	0.435649	0.394877	0.380287			0.012685	0.00401113	0.0150047	0.0118379	0.0270958	0.0418007	0.107331	0.0293292			0.0144345	0.00756822	0.0402023	0.0335475	0.033522	0.0540159
350.189	129.948	3536.78	3405.91	661	750.25	1102.88	556.281	1477.06	1594.26	1760.1	1400.23			530.131	619.381	972.006	425.412	1346.19	1463.39	1629.23	1269.36			0.15616	0.18245	0.286322	0.125313	0.396545	0.431069	0.479919	0.373914			0.0129242	0.0111789	0.0208531	0.0159036	0.0371379	0.0372207	0.192373	0.0229566			0.0147067	0.0210923	0.0558719	0.0450691	0.0459458	0.0480976
355.191	130.753	3524.97	3394.1	666.156	727.9	1134.21	547.354	1490.94	1502.1	1533.87	1327.23			535.287	597.031	1003.34	416.485	1360.07	1371.23	1403	1196.36			0.157678	0.175866	0.295551	0.122683	0.400633	0.403919	0.413278	0.35241			0.014443	0.00459526	0.0300828	0.013274	0.041226	0.0100713	0.125732	0.0014531			0.0164349	0.00867036	0.0806011	0.037617	0.0510034	0.0130144
360.194	130.727	3510.81	3379.94	677.219	763.317	1077.12	552.396	1424.97	1583.38	1545.77	1399.13			546.35	632.448	946.256	421.526	1294.1	1452.51	1414.9	1268.26			0.160937	0.186299	0.278737	0.124168	0.381201	0.427863	0.416784	0.37359			0.0177018	0.015028	0.0132679	0.0147591	0.0217936	0.0340155	0.129237	0.0226325			0.0201432	0.0283549	0.0355489	0.0418256	0.0269623	0.0439558
365.197	131.208	3529.25	3398.38	671.625	810.85	1074.62	551.719	1385.86	1568.02	1796.27	1392.03			540.756	679.981	943.756	420.849	1254.99	1437.15	1665.4	1261.16			0.159289	0.200301	0.278	0.123969	0.369681	0.42334	0.490573	0.371498			0.016054	0.0290297	0.0125315	0.0145596	0.0102742	0.0294918	0.203026	0.0205411			0.0182681	0.0547733	0.0335758	0.0412605	0.0127109	0.0381102
370.2	130.597	3543	3412.13	682	777.35	1094.02	554.094	1531.85	1498.57	2241.07	1338.2			551.131	646.481	963.152	423.224	1400.98	1367.7	2110.2	1207.33			0.162345	0.190432	0.283714	0.124668	0.412684	0.402881	0.621597	0.355641			0.0191101	0.0191616	0.0182449	0.0152592	0.0532767	0.00903322	0.33405	0.00468363			0.0217457	0.0361543	0.0488839	0.0432431	0.0659122	0.011673
375.202	131.39	3531.08	3400.21	677.812	806.05	1090.12	550.927	1498.85	1571.5	1927.07	1391.97			546.943	675.181	959.256	420.058	1367.98	1440.63	1796.2	1261.1			0.161112	0.198887	0.282566	0.123736	0.402963	0.424364	0.529102	0.371479			0.0178764	0.0276157	0.0170973	0.0143264	0.043556	0.0305158	0.241556	0.0205217			0.0203419	0.0521055	0.0458091	0.0405996	0.053886	0.0394333
380.205	130.468	3515.71	3384.84	676.344	877.1	1096.35	560.271	1527.48	1614.48	1886.97	1434.87			545.475	746.231	965.485	429.401	1396.62	1483.61	1756.1	1304			0.160679	0.219816	0.284401	0.126488	0.411398	0.437023	0.51729	0.384116			0.017444	0.0485448	0.0189322	0.0170788	0.0519912	0.0431751	0.229744	0.0331586			0.0198499	0.0915946	0.0507252	0.0483995	0.0643218	0.055792
385.208	131.39	3533.81	3402.94	668.281	776.6	1094.08	562.896	1494.11	1596.52	1950.9	1414.57			537.412	645.731	963.214	432.026	1363.24	1465.65	1820.03	1283.7			0.158304	0.190212	0.283732	0.127261	0.401566	0.431735	0.536123	0.378136			0.0150689	0.0189407	0.0182632	0.017852	0.0421589	0.037887	0.248576	0.0271789			0.0171472	0.0357375	0.0489329	0.0505908	0.0521575	0.0489586
390.21	130.935	3536.3	3405.43	690.344	822.3	1083.98	557.74	1494.32	1607.17	1601.2	1430.87			559.475	691.431	953.11	426.87	1363.45	1476.3	1470.33	1300			0.164803	0.203673	0.280756	0.125742	0.401628	0.43487	0.433112	0.382938			0.021568	0.0324025	0.0152869	0.0163332	0.0422213	0.0410221	0.145566	0.0319804			0.0245426	0.0611372	0.0409584	0.0462865	0.0522348	0.0530099
395.213	130.104	3552.13	3421.26	682.281	823.017	1142.29	555.635	1550.74	1589.98	1832.53	1416			551.412	692.148	1011.42	424.766	1419.87	1459.11	1701.66	1285.13			0.162428	0.203885	0.297933	0.125122	0.418249	0.429806	0.501256	0.378558			0.0191929	0.0326137	0.032464	0.0157133	0.058842	0.0359582	0.213709	0.027601			0.0218399	0.0615357	0.0869813	0.04453	0.0727973	0.0464662
400.216	131.104	3556.71	3425.84	684.125	818.5	1099.58	553.656	1560.15	1645.55	1582.13	1461.3			553.256	687.631	968.714	422.787	1429.28	1514.68	1451.26	1330.43			0.162971	0.202554	0.285352	0.124539	0.421021	0.446176	0.427496	0.391902			0.0197361	0.0312831	0.0198833	0.0151303	0.0616136	0.0523279	0.139949	0.0409449			0.022458	0.0590252	0.0532737	0.0428778	0.0762263	0.0676196
405.218	131.13	3566.76	3435.89	689.844	819.15	1108.12	547.854	1491.3	1714.05	2041.67	1516.33			558.975	688.281	977.256	416.985	1360.43	1583.18	1910.8	1385.46			0.164656	0.202745	0.287868	0.12283	0.40074	0.466354	0.56286	0.408113			0.0214207	0.0314746	0.0223995	0.0134213	0.0413332	0.0725058	0.275313	0.0571559			0.024375	0.0593864	0.0600154	0.0380344	0.051136	0.093694
410.221	130.675	3543.02	3412.15	676.312	748.3	1116.67	550.896	1508.89	1616.26	1873.43	1443.87			545.443	617.431	985.798	420.026	1378.02	1485.39	1742.56	1313			0.16067	0.181875	0.290384	0.123726	0.405922	0.437549	0.513303	0.386767			0.0174346	0.0106044	0.0249157	0.0143172	0.0465149	0.0437012	0.225757	0.0358097			0.0198391	0.0200085	0.0667571	0.0405735	0.0575467	0.0564719
415.224	129.675	3539.6	3408.73	683.312	788.2	1157.23	562.312	1507.41	1771.9	1943.87	1569.27			552.443	657.331	1026.36	431.443	1376.54	1641.04	1813	1438.4			0.162732	0.193629	0.302333	0.127089	0.405484	0.483397	0.534051	0.423706			0.0194966	0.0223577	0.036864	0.0176802	0.0460775	0.0895487	0.246504	0.0727486			0.0221855	0.0421846	0.0987702	0.0501038	0.0570055	0.115717
420.227	130.143	3528.97	3398.1	688.781	819	1151.73	553.896	1556.8	1633.9	1706.73	1459.3			557.912	688.131	1020.86	423.026	1425.93	1503.04	1575.86	1328.43			0.164343	0.202701	0.300713	0.12461	0.420034	0.442746	0.464199	0.391313			0.0211076	0.0314304	0.0352439	0.0152009	0.0606274	0.0488983	0.176652	0.0403558			0.0240187	0.059303	0.0944294	0.0430778	0.0750061	0.0631877
425.229	130.364	3543.36	3412.5	697.094	798.6	1134.25	559.333	1511.24	1638.21	1819.23	1455.03			566.225	667.731	1003.38	428.464	1380.37	1507.34	1688.36	1324.16			0.166792	0.196692	0.295564	0.126212	0.406614	0.444015	0.497338	0.390056			0.0235563	0.0254212	0.0300951	0.0168026	0.0472066	0.0501676	0.209791	0.0390989			0.0268052	0.0479649	0.0806343	0.0476169	0.0584024	0.0648279
430.232	130.468	3533.56	3402.69	675.312	805.833	1068.17	554.417	1477.02	1648.21	1592.77	1459.4			544.443	674.964	937.298	423.547	1346.15	1517.34	1461.9	1328.53			0.160375	0.198823	0.276098	0.124763	0.396531	0.446961	0.430628	0.391343			0.01714	0.0275518	0.0106292	0.0153544	0.0371244	0.0531133	0.143082	0.0403853			0.019504	0.0519849	0.0284789	0.0435126	0.045929	0.0686344
435.235	130.208	3557.05	3426.18	670.969	774.783	1098.12	554.26	1586.7	1665.33	1703.83	1479.8			540.1	643.914	967.256	423.391	1455.83	1534.46	1572.96	1348.93			0.159096	0.189676	0.284923	0.124717	0.42884	0.452004	0.463345	0.397352			0.0158607	0.0184055	0.0194539	0.0153083	0.0694332	0.058156	0.175798	0.0463945			0.0180482	0.0347276	0.052123	0.0433821	0.0859004	0.0751507
440.237	130.494	3555.36	3424.5	671	783.1	1116.79	555.333	1551.44	1664.48	2159.43	1475.33			540.131	652.231	985.923	424.464	1420.57	1533.61	2028.56	1344.46			0.159105	0.192126	0.290421	0.125033	0.418454	0.451751	0.59755	0.396036			0.0158698	0.0208554	0.0249526	0.0156244	0.0590473	0.0579035	0.310003	0.0450786			0.0180586	0.0393501	0.0668557	0.0442778	0.0730513	0.0748245
445.24	130.532	3538.78	3407.91	660.625	775.317	1117.33	545.458	1538.11	1663.86	1390.9	1465.23			529.756	644.448	986.464	414.589	1407.24	1532.99	1260.03	1334.36			0.156049	0.189834	0.290581	0.122125	0.414527	0.451569	0.371165	0.393061			0.0128137	0.0185628	0.0251119	0.0127155	0.0551198	0.0577212	0.0836181	0.0421035			0.014581	0.0350244	0.0672827	0.0360344	0.0681924	0.0745889
450.243	130.571	3549.73	3418.86	672.438	774	1103.75	545.542	1576.32	1585.43	1569.83	1405.07			541.569	643.131	972.881	414.672	1445.45	1454.56	1438.96	1274.2			0.159529	0.189446	0.286579	0.122149	0.425783	0.428467	0.423873	0.375338			0.0162934	0.0181748	0.0211108	0.0127401	0.0663759	0.0346188	0.136326	0.0243805			0.0185406	0.0342924	0.0565625	0.036104	0.082118	0.0447353
455.245	130.662	3547.3	3416.43	646.656	771.2	1088.77	550.729	1559.79	1588.38	1750.63	1405.3			515.787	640.331	957.902	419.86	1428.92	1457.51	1619.76	1274.43			0.151934	0.188621	0.282167	0.123677	0.420914	0.429336	0.47713	0.375406			0.00869889	0.0173501	0.0166985	0.0142681	0.0615067	0.0354884	0.189584	0.0244491			0.00989862	0.0327362	0.0447404	0.0404344	0.076094	0.045859
460.248	129.468	3531.79	3400.92	679.156	787.333	1076.29	553.188	1502.83	1700.69	1397.13	1517.5			548.287	656.464	945.423	422.318	1371.96	1569.82	1266.26	1386.63			0.161508	0.193373	0.278491	0.124401	0.404137	0.462419	0.373001	0.408457			0.0182723	0.0221023	0.0130226	0.0149923	0.0447296	0.068571	0.0854542	0.0574997			0.0207924	0.0417028	0.0348915	0.0424865	0.0553379	0.0886093
465.251	130	3517.97	3387.1	676.625	767.1	1083.35	546.802	1493.33	1645.43	1814.13	1464.47			545.756	636.231	952.485	415.933	1362.46	1514.56	1683.26	1333.6			0.160762	0.187413	0.280571	0.12252	0.401338	0.446141	0.495836	0.392835			0.0175268	0.0161423	0.0151028	0.0131113	0.0419312	0.0522929	0.208289	0.0418778			0.0199441	0.0304574	0.0404651	0.0371561	0.0518758	0.0675743
470.254	129.325	3528.06	3397.19	678.125	801.883	1062.67	546.854	1572.42	1600.5	1431.7	1424.17			547.256	671.014	931.798	415.985	1441.55	1469.63	1300.83	1293.3			0.161204	0.197659	0.274478	0.122536	0.424636	0.432906	0.383183	0.380964			0.0179686	0.0263883	0.00900907	0.0131267	0.0652288	0.0390582	0.0956365	0.0300068			0.0204469	0.0497895	0.0241381	0.0371996	0.0806989	0.0504721
475.256	129.922	3537.6	3406.73	676.219	783.417	1147.69	546.604	1497.61	1622.17	1473	1444.23			545.35	652.548	1016.82	415.735	1366.74	1491.3	1342.13	1313.36			0.160643	0.19222	0.299522	0.122462	0.402597	0.439288	0.395349	0.386875			0.0174072	0.0209488	0.0340535	0.013053	0.0431898	0.0454406	0.107802	0.0359176			0.019808	0.0395263	0.0912401	0.0369909	0.053433	0.0587196
480.259	130.818	3557.86	3426.99	678.562	818.4	1098.58	554.167	1501.68	1638.98	1675.23	1451.87			547.693	687.531	967.714	423.297	1370.81	1508.11	1544.36	1321			0.161333	0.202524	0.285057	0.12469	0.403797	0.44424	0.45492	0.389124			0.0180974	0.0312537	0.0195888	0.0152807	0.0443905	0.050392	0.167374	0.0381663			0.0205933	0.0589696	0.0524844	0.0433039	0.0549184	0.0651179
485.262	130.558	3527.25	3396.38	693.844	835.817	1101.67	548.917	1478.27	1576.4	1623.6	1408.17			562.975	704.948	970.798	418.047	1347.4	1445.54	1492.73	1277.3			0.165834	0.207655	0.285966	0.123143	0.396902	0.425808	0.439711	0.376251			0.022599	0.0363841	0.0204972	0.0137342	0.037495	0.0319606	0.152164	0.0252937			0.0257158	0.0686498	0.0549185	0.0389214	0.0463875	0.0413004
490.264	130.182	3551.44	3420.57	683.875	834.783	1075.81	551.573	1507.62	1560.79	1851.57	1404.07			553.006	703.914	944.943	420.704	1376.75	1429.92	1720.7	1273.2			0.162898	0.20735	0.27835	0.123926	0.405547	0.421208	0.506862	0.375043			0.0196624	0.0360796	0.0128812	0.0145167	0.0461399	0.0273598	0.219316	0.0240859			0.0223742	0.0680751	0.0345127	0.0411387	0.0570828	0.035355
495.267	130.494	3529.24	3398.37	673.25	800.5	1091.69	548.083	1533.65	1558.74	1883.33	1401.8			542.381	669.631	960.819	417.214	1402.78	1427.87	1752.46	1270.93			0.159768	0.197252	0.283026	0.122898	0.413215	0.420604	0.51622	0.374375			0.0165326	0.0259809	0.0175577	0.0134887	0.0538075	0.0267565	0.228673	0.0234182			0.0188128	0.0490209	0.0470426	0.0382257	0.0665689	0.0345755
500.27	130	3541.16	3410.29	690.812	780.067	1070.75	548.677	1529.73	1624.64	1412.57	1435.53			559.943	649.198	939.881	417.808	1398.86	1493.77	1281.7	1304.66			0.164941	0.191233	0.276859	0.123073	0.412059	0.440018	0.377547	0.384312			0.0217058	0.019962	0.0113901	0.0136637	0.0526517	0.04617	0.0900005	0.0333548			0.0246995	0.0376644	0.0305175	0.0387213	0.0651389	0.0596621
505.272	130.857	3530.21	3399.34	686.219	855.533	1075.92	557.667	1538.41	1623.6	1397.8	1442.17			555.35	724.664	945.048	426.797	1407.54	1492.73	1266.93	1311.3			0.163588	0.213463	0.278381	0.125721	0.414616	0.439709	0.373197	0.386266			0.0203529	0.0421919	0.0129121	0.0163117	0.0552091	0.0458613	0.0856506	0.035309			0.0231599	0.0796078	0.0345955	0.0462256	0.0683028	0.0592632
510.275	130.805	3543.51	3412.64	675.188	805.283	1083.56	561.156	1543.41	1700.14	1475.33	1501.07			544.319	674.414	952.693	430.287	1412.54	1569.27	1344.46	1370.2			0.160339	0.198661	0.280633	0.126749	0.416089	0.462258	0.396036	0.403616			0.0171035	0.0273898	0.0151641	0.0173396	0.0566819	0.0684099	0.108489	0.052659			0.0194624	0.0516792	0.0406293	0.0491386	0.070125	0.0884011
515.278	130.299	3544.24	3413.37	677.312	799.45	1079.79	549.031	1538.62	1677.26	1465.87	1496.2			546.443	668.581	948.923	418.162	1407.75	1546.39	1335	1365.33			0.160964	0.196942	0.279522	0.123177	0.414679	0.455518	0.393248	0.402183			0.0177292	0.0256716	0.0140535	0.013768	0.0552716	0.0616699	0.105701	0.0512254			0.0201743	0.0484373	0.0376538	0.0390169	0.0683801	0.0796914
520.281	130.753	3520.81	3389.94	678.625	771.167	1085.96	549.5	1626.74	1619.17	1571.7	1445.43			547.756	640.298	955.089	418.631	1495.87	1488.3	1440.83	1314.56			0.161351	0.188611	0.281339	0.123315	0.440636	0.438405	0.424423	0.387228			0.0181159	0.0173403	0.0158698	0.0139061	0.0812292	0.0445569	0.136876	0.036271			0.0206145	0.0327178	0.0425203	0.0394083	0.100494	0.0575777
525.283	130.273	3547.81	3416.94	668.25	774.8	1055.77	549.917	1587.85	1664.98	1720.77	1477.17			537.381	643.931	924.902	419.047	1456.98	1534.11	1589.9	1346.3			0.158295	0.189681	0.272446	0.123438	0.42918	0.451899	0.468333	0.396576			0.0150598	0.0184105	0.00697773	0.0140288	0.0697725	0.0580508	0.180786	0.0456189			0.0171368	0.034737	0.0186955	0.0397561	0.0863202	0.0750148
530.286	130.182	3510.14	3379.27	679.094	786.667	1075.06	554.896	1654.17	1690.45	1538.13	1493.23			548.225	655.798	944.193	424.026	1523.3	1559.58	1407.26	1362.36			0.161489	0.193177	0.278129	0.124905	0.448715	0.459403	0.414535	0.401309			0.0182541	0.0219061	0.0126602	0.0154955	0.0893077	0.0655552	0.126988	0.0503514			0.0207717	0.0413326	0.0339207	0.0439126	0.110488	0.0847122
535.289	130.39	3532.08	3401.21	681.188	794.75	1043.94	555.615	1551.47	1687.45	1917.5	1501.53			550.319	663.881	913.069	424.745	1420.6	1556.58	1786.63	1370.66			0.162106	0.195558	0.268961	0.125116	0.418463	0.458519	0.526284	0.403754			0.0188709	0.0242871	0.0034921	0.0157072	0.0590565	0.0646715	0.238738	0.0527963			0.0214736	0.0458251	0.00935644	0.0445126	0.0730626	0.0835703
540.291	130.494	3538.67	3407.8	682.562	771.55	1075.4	560.854	1453.15	1620.9	1712.43	1440.67			551.693	640.681	944.527	429.985	1322.28	1490.04	1581.56	1309.8			0.162511	0.188724	0.278227	0.12666	0.389502	0.438917	0.465878	0.385824			0.0192756	0.0174532	0.0127586	0.0172506	0.0300948	0.0450689	0.178331	0.0348671			0.0219341	0.0329307	0.0341843	0.0488865	0.0372323	0.0582392
545.294	131.026	3541.92	3411.05	671.844	775.333	1042.4	566.375	1520.44	1612.98	1667.77	1434.43			540.975	644.464	911.527	435.506	1389.57	1482.11	1536.9	1303.56			0.159354	0.189838	0.268507	0.128286	0.409323	0.436581	0.452721	0.383988			0.0161185	0.0185675	0.00303788	0.0188769	0.0499157	0.0427333	0.165174	0.0330308			0.0183415	0.0350333	0.00813943	0.0534951	0.061754	0.0552211
550.297	130.662	3530.09	3399.23	696.531	770.483	1058.35	570.823	1564.36	1742.93	1848.43	1537.77			565.662	639.614	927.485	439.954	1433.49	1612.06	1717.56	1406.9			0.166626	0.18841	0.273207	0.129596	0.422262	0.474861	0.505939	0.414427			0.0233905	0.0171388	0.00773859	0.0201871	0.0628546	0.0810133	0.218393	0.0634697			0.0266164	0.0323377	0.0207341	0.0572081	0.0777616	0.104687
555.299	130.766	3515.24	3384.37	682.281	799.633	1032.08	555.865	1497.08	1644.17	1819.63	1467.43			551.412	668.764	901.214	424.995	1366.21	1513.3	1688.76	1336.56			0.162428	0.196996	0.265469	0.12519	0.402441	0.445769	0.497456	0.393709			0.0191929	0.0257255	0	0.0157809	0.0430337	0.0519211	0.209909	0.0427515			0.0218399	0.048539	0	0.0447213	0.0532399	0.0670939
560.302	131.416	3499.09	3368.23	686.438	846.433	1090.56	560.469	1565.05	1643	1589.23	1463.63			555.569	715.564	959.693	429.599	1434.18	1512.13	1458.36	1332.76			0.163653	0.210782	0.282695	0.126546	0.422462	0.445425	0.429587	0.392589			0.0204174	0.0395113	0.017226	0.0171371	0.0630552	0.0515774	0.142041	0.0416322			0.0232333	0.0745501	0.046154	0.0485648	0.0780098	0.0666497
565.305	130.312	3502.41	3371.54	690.938	803.533	1067.19	569.781	1597.08	1724.17	1778.07	1527.77			560.069	672.664	936.319	438.912	1466.21	1593.3	1647.2	1396.9			0.164978	0.198145	0.275809	0.129289	0.431897	0.469334	0.485212	0.411481			0.0217429	0.0268743	0.0103408	0.0198802	0.0724905	0.0754866	0.197665	0.060524			0.0247417	0.0507066	0.0277063	0.0563385	0.0896828	0.0975458
570.307	130.494	3506.08	3375.21	693.25	771.633	1076.71	563.969	1536.71	1671.67	1601.2	1478			562.381	640.764	945.839	433.099	1405.84	1540.8	1470.33	1347.13			0.165659	0.188748	0.278614	0.127577	0.414116	0.45387	0.433112	0.396822			0.022424	0.0174776	0.0131451	0.0181681	0.0547092	0.0600218	0.145566	0.0458642			0.0255167	0.0329768	0.0352198	0.0514865	0.0676844	0.0775617
575.31	130.442	3528.09	3397.23	675.312	775.7	1072.58	560.958	1518.18	1675.29	1455.73	1478.57			544.443	644.831	941.714	430.089	1387.31	1544.42	1324.86	1347.7			0.160375	0.189946	0.277399	0.12669	0.408658	0.454936	0.390262	0.396989			0.01714	0.0186756	0.01193	0.0172813	0.0492509	0.0610878	0.102716	0.0460312			0.019504	0.0352372	0.0319642	0.0489734	0.0609315	0.0789393
580.313	131.546	3539.32	3408.45	661.906	750.733	1094.04	558.542	1556.74	1710.02	1871.5	1509.9			531.037	619.864	963.173	427.672	1425.87	1579.15	1740.63	1379.03			0.156426	0.182592	0.28372	0.125979	0.420016	0.465168	0.512734	0.406218			0.013191	0.0113211	0.0182511	0.0165694	0.0606094	0.0713205	0.225187	0.0552609			0.0150103	0.0213608	0.0489005	0.0469561	0.0749839	0.0921623
585.316	131.571	3534.13	3403.26	684.156	774.1	1097.56	565.146	1534.91	1695.38	1636.5	1495.27			553.287	643.231	966.693	434.276	1404.04	1564.51	1505.63	1364.4			0.162981	0.189475	0.284757	0.127924	0.413585	0.460855	0.443511	0.401908			0.0197452	0.0182043	0.019288	0.0185148	0.0541781	0.0670071	0.155964	0.0509505			0.0224684	0.034348	0.0516786	0.052469	0.0670273	0.0865884
590.318	129.805	3523.78	3392.91	687.406	786.367	1118	561.583	1525.98	1676.88	1679.4	1474.1			556.537	655.498	987.131	430.714	1395.12	1546.01	1548.53	1343.23			0.163938	0.193089	0.290777	0.126875	0.410956	0.455405	0.456148	0.395673			0.0207025	0.0218178	0.0253084	0.0174654	0.0515494	0.0615576	0.168601	0.0447154			0.0235578	0.0411659	0.0678091	0.0494951	0.0637752	0.0795464
595.321	130.896	3516.62	3385.75	665.281	819.383	1109.25	564.792	1524.09	1629.74	1749.43	1444.03			534.412	688.514	978.381	433.922	1393.22	1498.87	1618.56	1313.16			0.157421	0.202814	0.2882	0.12782	0.410398	0.441519	0.476777	0.386816			0.0141852	0.0315432	0.0227309	0.0184105	0.0509915	0.0476708	0.18923	0.0358586			0.0161416	0.0595159	0.0609033	0.0521734	0.0630849	0.0616015
600.324	130.753	3537.89	3407.02	705.062	763.983	1111.77	560.469	1565.64	1688.36	1630.87	1493.07			574.193	633.114	980.902	429.599	1434.77	1557.49	1500	1362.2			0.169139	0.186495	0.288942	0.126546	0.422636	0.458786	0.441851	0.40126			0.0259034	0.0152242	0.0234735	0.0171371	0.0632293	0.0649381	0.154305	0.0503025			0.029476	0.028725	0.0628929	0.0485648	0.0782252	0.0839147
605.326	131.208	3551.29	3420.42	699.688	778.967	1121.83	558.375	1443.24	1562.48	1714.87	1391.73			568.819	648.098	990.964	427.506	1312.37	1431.61	1584	1260.86			0.167556	0.190909	0.291906	0.125929	0.386583	0.421705	0.466595	0.37141			0.0243204	0.019638	0.0264375	0.0165203	0.027176	0.0278576	0.179048	0.0204527			0.0276746	0.037053	0.0708343	0.0468169	0.0336212	0.0359983
610.329	130.364	3550.32	3419.45	677.094	793.367	1139.65	556.177	1502.24	1684.4	1614.53	1493.6			546.225	662.498	1008.78	425.308	1371.37	1553.54	1483.66	1362.73			0.1609	0.195151	0.297153	0.125282	0.403962	0.457622	0.43704	0.401417			0.0176649	0.0238797	0.0316846	0.0158729	0.0445555	0.063774	0.149493	0.0504595			0.0201013	0.0450564	0.084893	0.0449822	0.0551225	0.0824104
615.332	131.247	3550.62	3419.75	680.156	759.083	1103.15	550.99	1630.26	1663.69	1507.4	1481.07			549.287	628.214	972.277	420.12	1499.39	1532.82	1376.53	1350.2			0.161802	0.185052	0.286402	0.123754	0.441672	0.45152	0.405482	0.397725			0.0185669	0.0137808	0.0209329	0.0143448	0.0822649	0.057672	0.117935	0.0467677			0.0211276	0.0260016	0.0560857	0.0406518	0.101775	0.0745253
620.334	130.636	3547.52	3416.65	671.031	770.783	1098.67	551.823	1568.89	1667.14	1639.5	1476.73			540.162	639.914	967.798	420.954	1438.02	1536.27	1508.63	1345.86			0.159114	0.188498	0.285082	0.123999	0.423596	0.452537	0.444394	0.396448			0.015879	0.0172272	0.0196135	0.0145903	0.064189	0.0586891	0.156848	0.045491			0.018069	0.0325044	0.0525507	0.0413474	0.0794125	0.0758397
625.337	131.416	3559.38	3428.51	674.562	745.15	1080.79	548.688	1495.53	1616.33	1386.97	1433.6			543.693	614.281	949.923	417.818	1364.66	1485.46	1256.1	1302.73			0.160154	0.180947	0.279817	0.123076	0.401985	0.43757	0.370006	0.383743			0.0169191	0.00967656	0.0143481	0.0136667	0.0425783	0.0437221	0.0824596	0.0327854			0.0192526	0.0182578	0.0384431	0.03873	0.0526765	0.0564989
630.34	131.312	3549.86	3418.99	676.594	783.233	1088.19	546.177	1526.21	1680.6	1282.47	1487.4			545.725	652.364	957.319	415.308	1395.34	1549.73	1151.6	1356.53			0.160753	0.192165	0.281995	0.122336	0.411023	0.4565	0.339224	0.39959			0.0175177	0.0208946	0.0165267	0.0129272	0.0516163	0.0626517	0.0516772	0.0486332			0.0199337	0.039424	0.0442803	0.0366344	0.0638579	0.0809601
635.343	131.922	3543.46	3412.59	667.188	733.317	1074.67	556.021	1512.12	1599.12	1376.37	1425.73			536.319	602.448	943.798	425.151	1381.25	1468.25	1245.5	1294.86			0.157982	0.177462	0.278013	0.125236	0.406872	0.432499	0.366884	0.381425			0.014747	0.00619093	0.0125439	0.0158269	0.0474655	0.0386514	0.0793372	0.030468			0.0167808	0.0116811	0.033609	0.0448517	0.0587227	0.0499464
640.345	132.688	3543.73	3412.86	683.438	776	1096.33	554.583	1585.29	1660.26	1608.27	1479.67			552.569	645.131	965.464	423.714	1454.42	1529.39	1477.4	1348.8			0.162769	0.190035	0.284395	0.124813	0.428425	0.45051	0.435194	0.397313			0.0195337	0.018764	0.018926	0.0154034	0.0690182	0.0566622	0.147647	0.0463553			0.0222277	0.035404	0.0507087	0.0436517	0.0853869	0.0732204
645.348	131.273	3541.29	3410.42	670.094	761.367	1135.29	559.25	1544.83	1633.43	1752.47	1453.6			539.225	630.498	1004.42	428.381	1413.96	1502.56	1621.6	1322.73			0.158838	0.185724	0.295871	0.126187	0.416508	0.442606	0.477671	0.389634			0.015603	0.0144536	0.0304021	0.0167781	0.0571014	0.0487581	0.190124	0.0386768			0.0177549	0.0272711	0.0814567	0.0475473	0.0706439	0.0630065
650.351	132.883	3556.3	3425.43	670.625	745.483	1106.12	557.792	1546.55	1653.12	1538.5	1466.1			539.756	614.614	975.256	426.922	1415.68	1522.25	1407.63	1335.23			0.158995	0.181045	0.287279	0.125758	0.417013	0.448406	0.414643	0.393316			0.0157594	0.00977465	0.0218104	0.0163485	0.0576057	0.0545581	0.127096	0.0423589			0.0179329	0.0184429	0.0584369	0.04633	0.0712678	0.0705014
655.353	133.013	3533.62	3402.75	687.469	759.067	1091.58	552.771	1577.82	1708.6	1642.43	1509.8			556.6	628.198	960.714	421.901	1446.95	1577.73	1511.56	1378.93			0.163956	0.185047	0.282995	0.124279	0.426225	0.464747	0.445258	0.406189			0.0207211	0.0137761	0.0175268	0.0148695	0.0668177	0.0708996	0.157712	0.0552315			0.0235789	0.0259927	0.0469598	0.0421387	0.0826646	0.0916183
660.356	132.909	3573.95	3443.08	680.5	781.367	1155.4	557.385	1519.76	1636.38	1670.37	1463.67			549.631	650.498	1024.53	426.516	1388.89	1505.51	1539.5	1332.8			0.161904	0.191616	0.301793	0.125638	0.409122	0.443475	0.453487	0.392599			0.0186682	0.0203449	0.0363241	0.0162288	0.0497151	0.0496276	0.16594	0.0416422			0.0212429	0.0383869	0.0973235	0.0459908	0.0615059	0.0641302
665.359	132.779	3555.24	3424.37	665.625	774.767	1130.46	554.385	1479.27	1740.67	1532.73	1534.17			534.756	643.898	999.589	423.516	1348.4	1609.8	1401.86	1403.3			0.157522	0.189672	0.294447	0.124754	0.397197	0.474195	0.412944	0.413367			0.0142865	0.0184008	0.0289781	0.0153451	0.0377895	0.0803469	0.125398	0.0624092			0.0162569	0.0347187	0.0776415	0.0434865	0.0467519	0.103826
670.361	131.468	3518.62	3387.75	686.844	808.833	1090.42	570.865	1468.48	1664.45	1489.17	1467.83			555.975	677.964	959.548	439.995	1337.62	1533.58	1358.3	1336.96			0.163772	0.199706	0.282652	0.129609	0.394019	0.451744	0.400111	0.393827			0.020537	0.0284355	0.0171833	0.0201994	0.0346117	0.0578964	0.112564	0.0428694			0.0233694	0.0536523	0.0460395	0.0572429	0.0428205	0.0748153
675.364	131.87	3540.32	3409.45	686.188	783.683	1123.81	557.188	1571.11	1757.95	1376.53	1551.67			555.319	652.814	992.943	426.318	1440.24	1627.08	1245.66	1420.8			0.163579	0.192298	0.292489	0.12558	0.424248	0.479286	0.366933	0.418521			0.0203437	0.0210271	0.0270204	0.0161705	0.0648406	0.0854386	0.0793861	0.0675642			0.0231495	0.0396741	0.0723962	0.0458256	0.0802186	0.110406
680.367	131.286	3509.03	3378.16	701.625	777.9	1075.81	559.323	1534.11	1657.93	1615.07	1471.73			570.756	647.031	944.943	428.454	1403.24	1527.06	1484.2	1340.86			0.168126	0.190594	0.27835	0.126209	0.413349	0.449823	0.437197	0.394975			0.024891	0.0193237	0.0128812	0.0167996	0.0539416	0.055975	0.149651	0.0440182			0.0283239	0.03646	0.0345127	0.0476082	0.0667347	0.0723324
685.37	132.909	3544.46	3413.59	699.781	791.45	1072.38	563.188	1601.91	1722.45	1765.67	1511.8			568.912	660.581	941.506	432.318	1471.04	1591.58	1634.8	1380.93			0.167583	0.194586	0.277337	0.127347	0.433321	0.468829	0.481559	0.406778			0.0243478	0.0233151	0.0118687	0.017938	0.0739142	0.0749814	0.194012	0.0558206			0.0277058	0.043991	0.0318001	0.0508343	0.0914441	0.096893
690.372	132.065	3540.7	3409.83	688.344	790.383	1157.21	556.812	1594.8	1750.4	1803.1	1536			557.475	659.514	1026.34	425.943	1463.93	1619.54	1672.23	1405.13			0.164214	0.194272	0.302326	0.125469	0.431228	0.477063	0.492586	0.413906			0.0209788	0.0230007	0.0368578	0.0160601	0.071821	0.0832154	0.205039	0.0629492			0.0238722	0.0433979	0.0987536	0.0455126	0.0888545	0.107533
695.375	132.442	3529.06	3398.19	694.438	800.967	1082.42	556.844	1552.83	1698.07	1729.9	1507.77			563.569	670.098	951.548	425.974	1421.96	1567.2	1599.03	1376.9			0.166009	0.197389	0.280295	0.125478	0.418865	0.461647	0.471023	0.40559			0.0227739	0.0261185	0.0148268	0.0160693	0.059458	0.0677995	0.183477	0.0546326			0.0259149	0.0492804	0.0397256	0.0455387	0.0735594	0.0876124
700.378	131.87	3527.29	3396.42	702.25	807.833	1102.92	556.083	1560.68	1769.05	1266.57	1559.53			571.381	676.964	972.048	425.214	1429.81	1638.18	1135.7	1428.66			0.16831	0.199412	0.286334	0.125254	0.421177	0.482555	0.33454	0.420839			0.0250751	0.028141	0.0208654	0.0158453	0.06177	0.0887071	0.0469936	0.0698812			0.0285334	0.0530965	0.055905	0.0449039	0.0764198	0.11463
705.38	131.247	3530.18	3399.31	691.281	769.417	1101.77	548.25	1554.76	1689.17	1495.93	1490			560.412	638.548	970.902	417.381	1423.89	1558.3	1365.06	1359.13			0.165079	0.188096	0.285997	0.122947	0.419432	0.459025	0.402104	0.400356			0.021844	0.0168248	0.0205279	0.0135378	0.060025	0.0651767	0.114557	0.049399			0.0248567	0.0317452	0.0550005	0.0383648	0.0742609	0.0842231
710.383	131.662	3545.65	3414.78	682.875	780.017	1115.21	553.281	1558.58	1724.9	1170.9	1515.9			552.006	649.148	984.339	422.412	1427.71	1594.04	1040.03	1385.03			0.162603	0.191218	0.289955	0.124429	0.420557	0.469552	0.30636	0.407986			0.0193678	0.0199473	0.024486	0.0150199	0.0611497	0.075704	0.0188132	0.0570284			0.022039	0.0376366	0.0656056	0.0425647	0.0756523	0.0978267
715.386	131.818	3554.73	3423.86	688.625	778.817	1127.08	547.208	1520.76	1840.45	1231.13	1625.73			557.756	647.948	996.214	416.339	1389.89	1709.58	1100.26	1494.86			0.164297	0.190865	0.293453	0.12264	0.409417	0.503588	0.324102	0.440339			0.0210616	0.0195938	0.027984	0.013231	0.0500097	0.10974	0.0365559	0.0893816			0.0239664	0.0369696	0.0749778	0.0374952	0.0618703	0.141809
720.388	130.519	3572.49	3441.62	687.156	754.933	1140.4	549.375	1553.89	1734.69	1573.57	1530.97			556.287	624.064	1009.53	418.506	1423.02	1603.82	1442.7	1400.1			0.163864	0.183829	0.297374	0.123278	0.419177	0.472434	0.424972	0.412424			0.0206289	0.0125583	0.0319055	0.0138692	0.0597705	0.0785863	0.137426	0.0614666			0.023474	0.0236951	0.0854849	0.0393039	0.073946	0.101551
725.391	130.468	3534.46	3403.59	688.844	823.2	1122.29	541.552	1631.06	1807.36	1388.13	1589.33			557.975	692.331	991.423	410.683	1500.19	1676.49	1257.26	1458.46			0.164361	0.203938	0.292041	0.120974	0.441908	0.49384	0.37035	0.429617			0.0211261	0.0326676	0.0265727	0.0115649	0.0825014	0.0999917	0.0828031	0.0786594			0.0240398	0.0616374	0.0711965	0.0327736	0.102068	0.129212
730.394	129.883	3537.41	3406.54	671.812	778.8	1158.75	543.104	1544.44	1747.88	1566.43	1548.63			540.943	647.931	1027.88	412.235	1413.57	1617.01	1435.56	1417.76			0.159344	0.19086	0.302781	0.121431	0.416392	0.47632	0.422871	0.417628			0.016109	0.0195888	0.037312	0.0120221	0.0569853	0.082472	0.135325	0.0666704			0.0183308	0.0369602	0.0999706	0.0340692	0.0705003	0.106572
735.396	130.857	3533.56	3402.69	681.688	774.55	1146.73	550.354	1571.38	1871.43	1400.87	1642			550.819	643.681	1015.86	419.485	1440.51	1740.56	1270	1511.13			0.162254	0.189608	0.29924	0.123567	0.424328	0.512713	0.374101	0.445131			0.0190182	0.0183369	0.033771	0.0141577	0.064921	0.118865	0.0865541	0.0941734			0.0216412	0.0345981	0.0904832	0.0401213	0.0803181	0.153601
740.399	130.974	3536.24	3405.37	678.812	789.933	1158.94	543.292	1671.11	1758.31	1567.67	1552.83			547.943	659.064	1028.07	412.422	1540.24	1627.44	1436.8	1421.96			0.161406	0.194139	0.302836	0.121486	0.453704	0.479392	0.423235	0.418865			0.018171	0.0228682	0.0373674	0.0120773	0.0942974	0.085544	0.135688	0.0679076			0.0206771	0.0431478	0.100119	0.0342258	0.116662	0.110542
745.402	131.078	3550.64	3419.77	701.188	771.35	1139.54	547.312	1640.53	1763.76	1666.27	1551.73			570.319	640.481	1008.67	416.443	1509.66	1632.89	1535.4	1420.86			0.167998	0.188665	0.297123	0.122671	0.444698	0.480998	0.452279	0.418541			0.0247623	0.0173942	0.031654	0.0132617	0.0852907	0.08715	0.164732	0.0675836			0.0281774	0.0328195	0.0848109	0.0375822	0.105519	0.112618
750.405	131.454	3547.97	3417.1	689.5	781.417	1132.71	552.594	1623.74	1779.05	1581.77	1556.77			558.631	650.548	1001.84	421.724	1492.87	1648.18	1450.9	1425.9			0.164555	0.19163	0.29511	0.124227	0.439752	0.485501	0.427388	0.420024			0.0213194	0.0203597	0.0296409	0.0148174	0.0803455	0.0916528	0.139841	0.0690665			0.0242597	0.0384147	0.0794173	0.0419909	0.0994007	0.118436
755.407	130.675	3538.25	3407.38	679.75	774.933	1133.98	540.302	1611.79	1756.62	1464.17	1554.03			548.881	644.064	1003.11	409.433	1480.92	1625.75	1333.3	1423.16			0.161683	0.189721	0.295484	0.120606	0.436231	0.478894	0.392747	0.419218			0.0184473	0.0184497	0.0300153	0.0111966	0.0768242	0.0850459	0.1052	0.0682611			0.0209915	0.0348109	0.0804204	0.0317301	0.0950443	0.109899
760.41	131.195	3542.02	3411.15	692.25	776.917	1138.08	537.219	1544.52	1812.45	1552.37	1586.97			561.381	646.048	1007.21	406.349	1413.65	1681.58	1421.5	1456.1			0.165365	0.190305	0.296693	0.119698	0.416415	0.49534	0.418728	0.42892			0.0221294	0.0190341	0.0312242	0.0102884	0.0570077	0.101493	0.131181	0.0779624			0.0251815	0.0359136	0.0836594	0.0291563	0.070528	0.131151
765.413	130.078	3540.71	3409.84	654.125	744.267	1139.31	539.896	1594.39	1753.79	1551.97	1544.8			523.256	613.398	1008.44	409.026	1463.52	1622.92	1421.1	1413.93			0.154134	0.180687	0.297055	0.120486	0.431107	0.478059	0.41861	0.416499			0.010899	0.00941645	0.0315862	0.011077	0.0717005	0.0842114	0.131063	0.0655414			0.0124022	0.017767	0.0846294	0.0313909	0.0887054	0.10882
770.415	130.714	3559.76	3428.89	664.062	779.55	1165.56	540.75	1561.27	1838.52	1574.57	1619.13			533.193	648.681	1034.69	409.881	1430.4	1707.65	1443.7	1488.26			0.157061	0.191081	0.304787	0.120738	0.421351	0.50302	0.425267	0.438395			0.0138261	0.0198097	0.0393186	0.0113286	0.0619441	0.109172	0.137721	0.0874375			0.015733	0.037377	0.105347	0.032104	0.0766351	0.141076
775.418	130.494	3536.73	3405.86	676	771.5	1130.52	548.802	1584.83	1733.33	1420.93	1524.97			545.131	640.631	999.652	417.933	1453.96	1602.46	1290.06	1394.1			0.160578	0.188709	0.294465	0.12311	0.428291	0.472034	0.380011	0.410656			0.0173427	0.0174384	0.0289967	0.0137005	0.0688841	0.0781866	0.0924649	0.0596992			0.0197346	0.0329029	0.0776912	0.0388257	0.0852211	0.101035
780.421	129.61	3558.65	3427.78	690.062	788.833	1150.73	546.292	1606.77	1805.14	1460.27	1587.27			559.193	657.964	1019.86	415.422	1475.9	1674.27	1329.4	1456.4			0.16472	0.193815	0.300418	0.12237	0.434754	0.493187	0.391598	0.429008			0.0214849	0.0225442	0.0349493	0.012961	0.0753469	0.0993395	0.104051	0.0780508			0.0244481	0.0425365	0.0936401	0.0367301	0.0932167	0.128369
785.423	130.831	3537.62	3406.75	676.625	776.3	1092.65	548.906	1605.89	1685.62	1540.47	1487.8			545.756	645.431	961.777	418.037	1475.02	1554.75	1409.6	1356.93			0.160762	0.190123	0.283309	0.12314	0.434495	0.457979	0.415222	0.399708			0.0175268	0.0188523	0.0178399	0.0137311	0.075088	0.0641316	0.127676	0.048751			0.0199441	0.0355707	0.0477987	0.0389126	0.0928964	0.0828725
790.426	130.909	3556.09	3425.23	668.75	773.7	1153.58	545.26	1579.14	1707.24	1635.83	1506.37			537.881	642.831	1022.71	414.391	1448.27	1576.37	1504.96	1375.5			0.158442	0.189357	0.301259	0.122066	0.426613	0.464348	0.443314	0.405178			0.0152071	0.0180865	0.03579	0.0126572	0.067206	0.0704998	0.155768	0.0542202			0.0173044	0.0341257	0.0958926	0.0358692	0.083145	0.0911018
795.429	130.792	3526.87	3396	670.938	743.983	1155.06	546.896	1601.83	1666.88	1592.73	1475.67			540.069	613.114	1024.19	416.026	1470.96	1536.01	1461.86	1344.8			0.159087	0.180604	0.301694	0.122548	0.433299	0.45246	0.430618	0.396134			0.0158516	0.0093328	0.0362257	0.0131389	0.0738918	0.058612	0.143072	0.045177			0.0180378	0.0176092	0.0970599	0.0372344	0.0914164	0.0757399
800.432	129.883	3531.41	3400.54	668.812	776.6	1151.46	550.781	1536.21	1750.05	1581.5	1543.8			537.943	645.731	1020.59	419.912	1405.34	1619.18	1450.63	1412.93			0.158461	0.190212	0.300633	0.123693	0.413969	0.476958	0.427309	0.416204			0.0152253	0.0189407	0.035164	0.0142835	0.0545619	0.0831103	0.139763	0.0652468			0.0173252	0.0357375	0.0942155	0.0404778	0.0675022	0.107397
805.434	130.753	3536.3	3405.43	665.906	754.117	1112.52	548.375	1549.38	1638.12	1806.03	1448.1			535.037	623.248	981.652	417.506	1418.51	1507.25	1675.16	1317.23			0.157605	0.183589	0.289163	0.122984	0.417847	0.443987	0.49345	0.388014			0.0143693	0.0123179	0.0236945	0.0135747	0.0584405	0.0501396	0.205903	0.0370566			0.0163511	0.0232416	0.0634849	0.0384692	0.0723006	0.0647917
810.437	130.948	3539.75	3408.88	685.656	790.35	1168.75	553.135	1519.52	1716.26	1485.8	1517.63			554.787	659.481	1037.88	422.266	1388.65	1585.39	1354.93	1386.76			0.163422	0.194262	0.305726	0.124386	0.409051	0.467006	0.399119	0.408496			0.020187	0.022991	0.0402577	0.0149769	0.0496435	0.073158	0.111573	0.0575388			0.0229712	0.0433796	0.107863	0.042443	0.0614173	0.0945367
815.44	129.87	3536.11	3405.24	689.281	759.6	1156.04	550.635	1591.61	1691.79	1351.87	1490.4			558.412	628.731	1025.17	419.766	1460.74	1560.92	1221	1359.53			0.16449	0.185204	0.301983	0.12365	0.430286	0.459796	0.359667	0.400474			0.0212548	0.0139331	0.0365143	0.0142405	0.0708792	0.0659482	0.0721202	0.0495169			0.0241863	0.026289	0.0978334	0.0403561	0.0876894	0.08522
820.442	130.519	3529.24	3398.37	672.156	760.517	1134.98	544.031	1538.68	1838.24	1204.43	1605.4			541.287	629.648	1004.11	413.162	1407.81	1707.37	1073.56	1474.53			0.159446	0.185474	0.295779	0.121704	0.414696	0.502936	0.316237	0.434349			0.0162104	0.0142032	0.0303099	0.0122951	0.0552895	0.109088	0.0286909	0.0833922			0.0184461	0.0267986	0.0812096	0.0348431	0.0684023	0.140967
825.445	130.935	3536.54	3405.67	679.906	764.067	1139.02	549.906	1523.82	1767.71	1689.97	1559.87			549.037	633.198	1008.15	419.037	1392.95	1636.84	1559.1	1429			0.161729	0.18652	0.296969	0.123435	0.410318	0.482162	0.45926	0.420937			0.0184933	0.0152489	0.0315005	0.0140257	0.0509111	0.0883141	0.171714	0.0699796			0.0210438	0.0287717	0.0843997	0.0397474	0.0629854	0.114122
830.448	130.13	3548.89	3418.02	680.312	740.25	1116.52	548.354	1534.29	1790.88	1416.83	1572.53			549.443	609.381	985.652	417.485	1403.42	1660.01	1285.96	1441.66			0.161848	0.179504	0.290341	0.122978	0.413402	0.488986	0.378804	0.424668			0.0186129	0.00823317	0.0248727	0.0135685	0.0539952	0.0951384	0.0912572	0.0737106			0.0211799	0.0155344	0.0666418	0.0384518	0.066801	0.12294
835.45	130.571	3569.95	3439.08	680.219	780.9	1141.23	553.25	1587.2	1890.71	1543.07	1659.73			549.35	650.031	1010.36	422.381	1456.33	1759.84	1412.2	1528.86			0.161821	0.191478	0.29762	0.12442	0.428987	0.518394	0.415988	0.450354			0.0185855	0.0202074	0.0321509	0.0150107	0.0695805	0.124546	0.128442	0.0993969			0.0211488	0.0381274	0.0861424	0.0425387	0.0860826	0.160942
840.453	130.571	3556.87	3426	679.656	804.733	1096.71	548.833	1615.52	1799	1445.73	1587.13			548.787	673.864	965.839	417.964	1484.65	1668.13	1314.86	1456.26			0.161655	0.198499	0.284505	0.123119	0.437329	0.491378	0.387317	0.428969			0.0184196	0.0272278	0.0190365	0.0137097	0.0779221	0.09753	0.0997702	0.0780113			0.02096	0.0513736	0.0510046	0.0388517	0.0964025	0.126031
845.456	129.844	3558.38	3427.51	684.938	770.967	1107	557.146	1580.11	1749.4	1467.3	1549.87			554.069	640.098	976.131	426.276	1449.24	1618.54	1336.43	1419			0.163211	0.188552	0.287537	0.125567	0.426899	0.476769	0.39367	0.417991			0.0199755	0.0172814	0.0220681	0.0161583	0.0674917	0.0829209	0.106123	0.0670339			0.0227305	0.0326067	0.0591275	0.0457908	0.0834985	0.107153
850.458	130.519	3570.64	3439.77	680.062	728.267	1095.6	549.792	1507.95	1726.81	1483	1532.33			549.193	597.398	964.735	418.922	1377.09	1595.94	1352.13	1401.46			0.161775	0.175974	0.28418	0.123401	0.405645	0.470113	0.398294	0.412826			0.0185392	0.00470337	0.0187113	0.013992	0.0462383	0.0762651	0.110748	0.061869			0.0210961	0.00887434	0.0501333	0.0396518	0.0572045	0.0985518
855.461	130.896	3572.84	3441.97	670.469	759.817	1101.23	546.062	1651.58	1805.45	1425.1	1601.27			539.6	628.948	970.36	415.193	1520.71	1674.58	1294.23	1470.4			0.158949	0.185268	0.285837	0.122303	0.447951	0.493278	0.381239	0.433132			0.0157134	0.013997	0.0203682	0.0128935	0.0885445	0.0994305	0.0936923	0.0821747			0.0178806	0.0264096	0.0545728	0.0365387	0.109544	0.128487
860.464	129.571	3575.22	3444.35	685.5	762.3	1141.52	546.677	1610.05	1736.4	1794.87	1548.57			554.631	631.431	1010.65	415.808	1479.18	1605.54	1664	1417.7			0.163376	0.185999	0.297706	0.122484	0.435718	0.472939	0.49016	0.417608			0.0201411	0.0147284	0.0322369	0.0130745	0.0763108	0.0790915	0.202614	0.066651			0.0229189	0.0277896	0.0863728	0.0370518	0.0944091	0.102204
865.467	129.974	3560.22	3429.35	697.062	755.183	1120.73	543.594	1568.79	1770.07	1649.87	1569.73			566.193	624.314	989.86	412.724	1437.92	1639.2	1519	1438.86			0.166782	0.183903	0.291581	0.121575	0.423565	0.482856	0.447448	0.423843			0.0235469	0.012632	0.0261123	0.0121663	0.0641578	0.0890084	0.159901	0.0728858			0.0267944	0.023834	0.069963	0.0344779	0.0793738	0.115019
870.469	130.844	3575.79	3444.92	685.344	748.8	1118.21	542.177	1498.29	1736.19	1526.07	1544.17			554.475	617.931	987.339	411.308	1367.42	1605.32	1395.2	1413.3			0.16333	0.182023	0.290838	0.121158	0.402798	0.472876	0.410981	0.416312			0.0200951	0.0107517	0.0253697	0.011749	0.0433907	0.0790282	0.123434	0.0653549			0.0228666	0.0202864	0.0679733	0.0332953	0.0536816	0.102122
875.472	130.494	3571.78	3440.91	674.344	760.283	1110.62	549.656	1490.33	1798.12	1546.43	1593.07			543.475	629.414	979.756	418.787	1359.46	1667.25	1415.56	1462.2			0.16009	0.185405	0.288605	0.123361	0.400454	0.491118	0.41698	0.430717			0.0168549	0.0141343	0.023136	0.0139521	0.0410475	0.0972705	0.129433	0.0797593			0.0191795	0.0266686	0.0619885	0.0395387	0.0507825	0.125695
880.475	130.013	3566.38	3435.51	687.969	736.083	1128.33	540.375	1584	1795.9	1615.87	1588.93			557.1	605.214	997.464	409.506	1453.13	1665.04	1485	1458.06			0.164104	0.178277	0.293821	0.120627	0.428046	0.490466	0.437433	0.429499			0.0208684	0.00700571	0.0283522	0.0112181	0.0686388	0.0966183	0.149886	0.0785415			0.0237465	0.0132184	0.0759643	0.031791	0.0849175	0.124853
885.477	129.338	3566.35	3435.48	679.688	774.283	1140.23	537.062	1630.39	1863.21	1508.47	1647.5			548.819	643.414	1009.36	406.193	1499.52	1732.34	1377.6	1516.63			0.161664	0.189529	0.297325	0.119651	0.441712	0.510293	0.405796	0.446751			0.0184291	0.0182582	0.0318563	0.0102424	0.0823049	0.116445	0.11825	0.0957935			0.0209708	0.0344497	0.0853531	0.0290258	0.101825	0.150474
890.48	130.364	3534.21	3403.34	685.562	774.9	1168.6	534.615	1545.41	1772.74	1682.8	1569.77			554.693	644.031	1037.73	403.745	1414.54	1641.87	1551.93	1438.9			0.163395	0.189711	0.305683	0.11893	0.416678	0.483642	0.457149	0.423853			0.0201593	0.01844	0.0402147	0.00952129	0.0572711	0.089794	0.169603	0.0728958			0.0229397	0.0347926	0.107748	0.0269823	0.0708538	0.116034
895.483	130.792	3461.06	3330.19	698.406	752.4	1144.67	540.302	1531.45	1807.26	1620.43	1597.13			567.537	621.531	1013.8	409.433	1400.59	1676.39	1489.56	1466.26			0.167178	0.183083	0.298632	0.120606	0.412568	0.493812	0.438778	0.431914			0.0239428	0.0118122	0.0331636	0.0111966	0.0531607	0.0999637	0.151231	0.080957			0.0272449	0.0222873	0.0888558	0.0317301	0.0657686	0.129176
900.485	130.714	3496.59	3365.72	692.531	747.05	1128.02	549.74	1595.05	1868.81	1836.5	1663.53			561.662	616.181	997.152	418.87	1464.18	1737.94	1705.63	1532.66			0.165448	0.181507	0.293729	0.123386	0.431299	0.511942	0.502424	0.451474			0.0222122	0.0102362	0.0282603	0.0139766	0.0718923	0.118094	0.214878	0.100516			0.0252757	0.0193138	0.0757181	0.0396083	0.0889427	0.152604
905.488	130.494	3484.94	3354.07	684.375	760.283	1123.6	544.938	1548.38	1869.33	2115.5	1655.27			553.506	629.414	992.735	414.068	1417.51	1738.46	1984.63	1524.4			0.163045	0.185405	0.292428	0.121971	0.417553	0.512096	0.584609	0.449039			0.0198097	0.0141343	0.0269592	0.0125621	0.0581459	0.118248	0.297062	0.0980814			0.0225418	0.0266686	0.072232	0.0355996	0.0719362	0.152803
910.491	130.87	3493.16	3362.29	682.75	758.067	1106.52	545.062	1542.92	1898.5	1501.47	1661.53			551.881	627.198	975.652	414.193	1412.05	1767.63	1370.6	1530.66			0.162566	0.184752	0.287396	0.122008	0.415946	0.520687	0.403734	0.450884			0.019331	0.0134815	0.021927	0.0125989	0.0565391	0.126839	0.116188	0.0999272			0.0219971	0.025437	0.0587494	0.035704	0.0699482	0.163905
915.494	131.623	3464.05	3333.18	672.719	780.317	1153.6	544.26	1574.71	1924.24	1381.1	1679.6			541.85	649.448	1022.73	413.391	1443.84	1793.37	1250.23	1548.73			0.159612	0.191306	0.301265	0.121772	0.42531	0.528269	0.368278	0.456206			0.0163762	0.0200356	0.0357962	0.0123626	0.0659028	0.134421	0.0807314	0.105249			0.0186348	0.0378033	0.0959092	0.0350344	0.0815327	0.173703
920.496	130.675	3490	3359.13	668.5	758.717	1128.58	540.25	1596.56	1838.48	2366.33	1612.2			537.631	627.848	997.714	409.381	1465.69	1707.61	2235.46	1481.33			0.158369	0.184944	0.293894	0.12059	0.431746	0.503006	0.658496	0.436353			0.0151334	0.013673	0.0284258	0.0111813	0.0723388	0.109158	0.370949	0.0853952			0.0172206	0.0257982	0.0761616	0.0316866	0.0894951	0.141057
925.499	130.519	3491.43	3360.56	677.344	784.8	1123.73	544.344	1576.89	1865.45	1591.1	1627			546.475	653.931	992.86	413.474	1446.02	1734.58	1460.23	1496.13			0.160974	0.192627	0.292465	0.121796	0.425953	0.510952	0.430137	0.440712			0.0177386	0.0213562	0.026996	0.0123872	0.0665456	0.117105	0.142591	0.0897549			0.0201851	0.0402949	0.0723307	0.035104	0.0823279	0.151326
930.502	131.519	3467.51	3336.64	689.562	761.533	1137.48	551.01	1617.12	1848.29	1413.6	1636.1			558.693	630.664	1006.61	420.141	1486.25	1717.42	1282.73	1505.23			0.164573	0.185773	0.296515	0.12376	0.437802	0.505896	0.377851	0.443393			0.0213376	0.0145025	0.0310463	0.014351	0.0783951	0.112048	0.0903048	0.0924354			0.0242805	0.0273633	0.0831827	0.0406691	0.0969878	0.144791
935.504	131.39	3460.35	3329.48	688.5	754.25	1136.58	541.062	1480.65	1840.6	1240.57	1613.37			557.631	623.381	1005.71	410.193	1349.78	1709.73	1109.7	1482.5			0.16426	0.183628	0.296251	0.12083	0.397602	0.50363	0.326881	0.436696			0.0210248	0.0123571	0.0307824	0.0114206	0.0381954	0.109783	0.0393348	0.085739			0.0239245	0.0233155	0.0824756	0.0323649	0.0472541	0.141864
940.507	130.351	3535.19	3404.32	701.812	761.433	1123.98	545.365	1570.89	1799.17	1552.03	1592.9			570.943	630.564	993.11	414.495	1440.02	1668.3	1421.16	1462.03			0.168181	0.185744	0.292538	0.122097	0.424185	0.491427	0.418629	0.430667			0.0249461	0.014473	0.0270696	0.0126879	0.0647781	0.0975792	0.131083	0.0797101			0.0283866	0.0273077	0.072528	0.0359562	0.0801413	0.126094
945.51	131.117	3527.43	3396.56	695.906	766.667	1147.75	546.677	1540.47	1865.05	1414.43	1645.93			565.037	635.798	1016.88	415.808	1409.6	1734.18	1283.56	1515.06			0.166442	0.187286	0.29954	0.122484	0.415223	0.510833	0.378097	0.446289			0.0232064	0.0160148	0.0340718	0.0130745	0.0558162	0.116986	0.0905502	0.0953319			0.0264069	0.0302168	0.091289	0.0370518	0.0690539	0.151172
950.512	130.766	3544.14	3413.27	695.75	788.25	1123.44	542.542	1563.62	1839.88	1527.7	1613.4			564.881	657.381	992.569	411.672	1432.75	1709.01	1396.83	1482.53			0.166396	0.193643	0.292379	0.121265	0.422043	0.50342	0.411462	0.436706			0.0231604	0.0223724	0.0269103	0.0118564	0.0626358	0.109572	0.123915	0.0857487			0.0263547	0.0422124	0.072101	0.0335997	0.0774908	0.141592
955.515	129.831	3546.13	3415.26	680.562	771.15	1159.56	548.625	1631.26	1837.9	1308.17	1610.2			549.693	640.281	1028.69	417.756	1500.39	1707.04	1177.3	1479.33			0.161922	0.188606	0.30302	0.123057	0.441966	0.502838	0.346794	0.435763			0.0186865	0.0173353	0.0375512	0.0136483	0.0825594	0.10899	0.0592476	0.0848061			0.0212637	0.0327084	0.100612	0.0386779	0.10214	0.14084
960.518	130.091	3547.98	3417.11	676	782.333	1140.23	543.115	1551.98	1816.9	1258.77	1600.6			545.131	651.464	1009.36	412.245	1421.12	1686.04	1127.9	1469.73			0.160578	0.1919	0.297325	0.121434	0.418615	0.496652	0.332243	0.432936			0.0173427	0.0206295	0.0318563	0.0120251	0.0592082	0.102804	0.044696	0.0819783			0.0197346	0.0389238	0.0853531	0.0340779	0.0732503	0.132846
965.521	130.87	3556.52	3425.65	689.688	782.867	1106.44	539.083	1577.06	1751.14	1336.8	1563.03			558.819	651.998	975.569	408.214	1446.19	1620.27	1205.93	1432.16			0.16461	0.192058	0.287371	0.120247	0.426002	0.477281	0.355229	0.42187			0.0213747	0.0207868	0.0219026	0.0108376	0.0665947	0.0834328	0.067682	0.0709122			0.0243227	0.0392206	0.0586839	0.0307127	0.0823888	0.107814
970.523	130.571	3539.14	3408.27	692.531	774.4	1123.12	550.604	1609.77	1851.76	1492.6	1630.57			561.662	643.531	992.256	419.735	1478.9	1720.89	1361.73	1499.7			0.165448	0.189564	0.292287	0.12364	0.435638	0.50692	0.401122	0.441763			0.0222122	0.0182927	0.0268181	0.0142313	0.0762307	0.113072	0.113576	0.0908056			0.0252757	0.0345147	0.071854	0.04033	0.09431	0.146115
975.526	130.675	3563.44	3432.57	684.469	776.367	1102.81	544.333	1567.76	1698.57	1330.3	1510.3			553.6	645.498	971.943	413.464	1436.89	1567.7	1199.43	1379.43			0.163073	0.190143	0.286303	0.121793	0.423261	0.461795	0.353314	0.406336			0.0198374	0.0188721	0.0208345	0.0123841	0.0638544	0.0679468	0.0657673	0.0553788			0.0225733	0.035608	0.0558221	0.0350953	0.0789985	0.0878027
980.529	130.117	3556.52	3425.65	688.25	762.933	1120.02	534.146	1571.15	1793.79	1346.97	1588.5			557.381	632.064	989.152	403.276	1440.28	1662.92	1216.1	1457.63			0.164186	0.186186	0.291372	0.118792	0.424261	0.489842	0.358223	0.429371			0.0209511	0.0149149	0.0259037	0.0093832	0.0648538	0.0959941	0.0706769	0.078414			0.0238407	0.0281414	0.0694042	0.026591	0.080235	0.124046
985.531	131.338	3552.87	3422	696.281	794.1	1137.79	552.156	1611.62	1773.62	1235.47	1560.33			565.412	663.231	1006.92	421.287	1480.75	1642.75	1104.6	1429.46			0.166552	0.195366	0.296607	0.124098	0.436182	0.483901	0.325379	0.421074			0.0233168	0.0240957	0.0311385	0.0146885	0.076775	0.0900535	0.0378325	0.0701169			0.0265326	0.0454638	0.0834298	0.0416256	0.0949834	0.11637
990.534	130.818	3547.05	3416.18	705.406	748.833	1125.96	542.26	1541.26	1776.14	1449.57	1572.97			574.537	617.964	995.089	411.391	1410.39	1645.27	1318.7	1442.1			0.16924	0.182032	0.293121	0.121183	0.415455	0.484645	0.388446	0.424796			0.0260048	0.0107615	0.0276526	0.0117735	0.0560483	0.090797	0.1009	0.0738385			0.0295913	0.0203048	0.0740899	0.0333649	0.0693411	0.11733
995.537	131.364	3550.67	3419.8	703.188	754.233	1163.02	543.906	1617.03	1826.81	1273.23	1602.17			572.319	623.364	1032.15	413.037	1486.16	1695.94	1142.36	1471.3			0.168587	0.183623	0.304039	0.121667	0.437775	0.49957	0.336504	0.433397			0.0253514	0.0123521	0.0385701	0.0122583	0.0783683	0.105722	0.0489572	0.0824398			0.0288478	0.023306	0.103341	0.0347387	0.0969546	0.136617
1000.54	131.104	3565.13	3434.26	708.469	772.067	1120.38	550.125	1558.38	1951.05	1624.87	1698.03			577.6	641.198	989.506	419.256	1427.51	1820.18	1494	1567.16			0.170142	0.188876	0.291477	0.123499	0.420499	0.536166	0.440084	0.461636			0.026907	0.0176054	0.026008	0.0140902	0.0610916	0.142318	0.152537	0.110679			0.030618	0.033218	0.0696836	0.03993	0.0755805	0.183908
1005.54	129.766	3547.62	3416.75	677.906	775.817	1113.52	548.396	1607.24	1817.33	1514.2	1599.93			547.037	644.948	982.652	417.526	1476.37	1686.46	1383.33	1469.06			0.161139	0.189981	0.289458	0.12299	0.434892	0.496778	0.407485	0.432739			0.0179041	0.0187101	0.023989	0.0135808	0.0754851	0.10293	0.119938	0.0817818			0.0203734	0.0353023	0.0642741	0.0384865	0.0933876	0.133009
1010.54	129.779	3548.97	3418.1	687.719	763.783	1126.67	538.708	1593.79	1790.62	1159.13	1586.43			556.85	632.914	995.798	407.839	1462.92	1659.75	1028.26	1455.56			0.16403	0.186436	0.29333	0.120136	0.430929	0.488909	0.302894	0.428762			0.0207947	0.0151652	0.0278614	0.0107272	0.071522	0.0950612	0.015347	0.0778051			0.0236627	0.0286139	0.0746495	0.0303996	0.0884846	0.122841
1015.55	130.87	3547.71	3416.84	681	788.05	1109.25	545.448	1569.86	1955.1	1570.9	1695.9			550.131	657.181	978.381	414.579	1438.99	1824.23	1440.03	1565.03			0.162051	0.193584	0.2882	0.122122	0.423882	0.537358	0.424187	0.461008			0.0188155	0.0223135	0.0227309	0.0127124	0.0644747	0.143511	0.13664	0.110051			0.0214105	0.0421013	0.0609033	0.0360257	0.079766	0.185448
1020.55	130.546	3536.52	3405.65	688.344	789.95	1139.94	544.042	1589.42	1906.52	1233.03	1659.17			557.475	659.081	1009.07	413.172	1458.55	1775.65	1102.16	1528.3			0.164214	0.194144	0.297239	0.121707	0.429643	0.523051	0.324662	0.450188			0.0209788	0.0228732	0.0317706	0.0122982	0.0702365	0.129203	0.0371156	0.0992302			0.0238722	0.0431573	0.0851235	0.0348518	0.0868942	0.16696
1025.55	131.532	3543.94	3413.07	715.875	784.95	1133.94	535.688	1593.5	1782.38	1346.03	1567.97			585.006	654.081	1003.07	404.818	1462.63	1651.51	1215.16	1437.1			0.172324	0.192671	0.295472	0.119246	0.430844	0.486482	0.357948	0.423323			0.0290886	0.0214004	0.0300032	0.00983733	0.0714371	0.0926346	0.0704017	0.0723656			0.0331004	0.0403783	0.080388	0.027878	0.0883796	0.119705
1030.56	131.208	3542.81	3411.94	691.719	817.25	1167.94	548.917	1538.97	1888.02	1290.97	1658.77			560.85	686.381	1037.07	418.047	1408.1	1757.15	1160.1	1527.9			0.165208	0.202186	0.305487	0.123143	0.414781	0.517601	0.341728	0.45007			0.021973	0.0309149	0.0400185	0.0137342	0.0553744	0.123754	0.0541811	0.0991124			0.0250035	0.0583304	0.107222	0.0389214	0.0685073	0.159918
1035.56	131.039	3547.33	3416.46	688.125	791.833	1166.35	536.073	1610.12	2003.9	1775.8	1731.63			557.256	660.964	1035.48	405.204	1479.25	1873.04	1644.93	1600.76			0.16415	0.194699	0.305021	0.11936	0.43574	0.551736	0.484544	0.471534			0.0209143	0.0234279	0.0395519	0.00995086	0.0763332	0.157888	0.196997	0.120576			0.0237988	0.0442038	0.105972	0.0281997	0.0944368	0.204028
1040.56	130.948	3539.46	3408.59	691.75	788.483	1167.38	547.385	1618.33	2031.6	1617.57	1762.13			560.881	657.614	1036.51	416.516	1487.46	1900.73	1486.7	1631.26			0.165217	0.193712	0.305321	0.122692	0.438159	0.559893	0.437933	0.480518			0.0219821	0.0224411	0.0398527	0.0132832	0.0787522	0.166045	0.150387	0.129561			0.0250139	0.0423419	0.106778	0.0376431	0.0974295	0.214568
1045.56	131.883	3524.76	3393.89	719.531	827.15	1150.19	539.75	1651.67	1991.29	1534.9	1738.07			588.662	696.281	1019.32	408.881	1520.8	1860.42	1404.03	1607.2			0.173401	0.205102	0.300259	0.120443	0.447978	0.548019	0.413582	0.473429			0.0301655	0.0338311	0.0347899	0.011034	0.0885713	0.154171	0.126036	0.122472			0.0343259	0.0638328	0.0932132	0.0312692	0.109577	0.199224
1050.57	131.688	3533.25	3402.38	698.406	786.05	1177.21	537.49	1566.11	1996	1333.27	1731.37			567.537	655.181	1046.34	406.62	1435.24	1865.13	1202.4	1600.5			0.167178	0.192995	0.308218	0.119777	0.422775	0.549408	0.354188	0.471455			0.0239428	0.0217244	0.0427492	0.0103682	0.0633678	0.15556	0.0666413	0.120498			0.0272449	0.0409897	0.114538	0.0293823	0.0783964	0.201019
1055.57	131.325	3543.62	3412.75	692.156	820.733	1159.73	543.51	1559.53	1929.67	1398.57	1672.33			561.287	689.864	1028.86	412.641	1428.66	1798.8	1267.7	1541.46			0.165337	0.203212	0.303069	0.121551	0.420838	0.529868	0.373423	0.454066			0.0221017	0.0319409	0.0376004	0.0121417	0.0614307	0.13602	0.0858766	0.103109			0.02515	0.0602662	0.100743	0.0344083	0.0759999	0.175769
1060.57	131.26	3512.25	3381.38	696	785.15	1160.85	537.354	1601.14	1941.19	1425.23	1690.73			565.131	654.281	1029.98	406.485	1470.27	1810.32	1294.36	1559.86			0.166469	0.19273	0.3034	0.119737	0.433093	0.533262	0.381278	0.459486			0.023234	0.0214593	0.0379318	0.0103283	0.0736865	0.139415	0.0937315	0.108529			0.0264385	0.0404895	0.101631	0.0292693	0.0911624	0.180155
1065.57	132.519	3531.68	3400.81	713.719	797.4	1159.75	540.333	1528.88	1933.98	1600.17	1683.8			582.85	666.531	1028.88	409.464	1398.01	1803.11	1469.3	1552.93			0.171689	0.196339	0.303075	0.120615	0.411809	0.531137	0.432808	0.457444			0.0284535	0.0250677	0.0376066	0.0112058	0.0524019	0.13729	0.145261	0.106486			0.0323778	0.0472979	0.10076	0.0317562	0.0648298	0.177409
1070.58	132.714	3535.73	3404.86	697	830.733	1151.21	533.448	1648.71	2023.36	1326	1754.43			566.131	699.864	1020.34	402.579	1517.84	1892.49	1195.13	1623.56			0.166764	0.206157	0.300559	0.118587	0.447108	0.557466	0.352047	0.47825			0.0235286	0.0348866	0.0350904	0.00917762	0.0877008	0.163618	0.0645007	0.127293			0.0267736	0.0658242	0.0940182	0.0260084	0.108501	0.211432
1075.58	132.818	3539.46	3408.59	694.469	795.617	1149.9	542.854	1561.56	1924.76	1630.17	1679.57			563.6	664.748	1019.03	411.985	1430.69	1793.89	1499.3	1548.7			0.166018	0.195813	0.300173	0.121358	0.421436	0.528423	0.441645	0.456197			0.0227831	0.0245425	0.0347039	0.0119484	0.0620289	0.134575	0.154099	0.105239			0.0259253	0.046307	0.0929827	0.0338605	0.0767401	0.173902
1080.58	132.416	3547.03	3416.16	687.281	779.767	1163.4	537.062	1659.86	1861.79	1323.3	1632.13			556.412	648.898	1032.53	406.193	1528.99	1730.92	1192.43	1501.26			0.163901	0.191144	0.304149	0.119651	0.450393	0.509873	0.351252	0.442224			0.0206657	0.0198736	0.0386806	0.0102424	0.0909859	0.116025	0.0637053	0.0912669			0.0235159	0.0374976	0.103637	0.0290258	0.112565	0.14993
1085.59	132.766	3517.91	3387.04	712.25	801.733	1193.31	534.865	1597.56	1910.98	1502.23	1676.03			581.381	670.864	1062.44	403.995	1466.69	1780.11	1371.36	1545.16			0.171256	0.197615	0.312962	0.119004	0.43204	0.524362	0.40396	0.455156			0.0280208	0.0263441	0.0474929	0.00959493	0.0726334	0.130515	0.116413	0.104198			0.0318854	0.0497062	0.127248	0.027191	0.0898596	0.168654
1090.59	132.519	3513.62	3382.75	702.781	793.033	1196.15	538.333	1653.5	1909.98	1505.53	1670.1			571.912	662.164	1065.28	407.464	1522.63	1779.11	1374.66	1539.23			0.168467	0.195052	0.313796	0.120026	0.448518	0.524068	0.404932	0.453408			0.0252315	0.0237814	0.0483277	0.0106167	0.0891112	0.13022	0.117385	0.102451			0.0287114	0.0448708	0.129485	0.0300866	0.110245	0.168274
1095.59	133.506	3452.64	3321.77	684.219	816.1	1148.1	536.594	1634.88	1851.9	1474.8	1620.13			553.35	685.231	1017.23	405.724	1504.01	1721.04	1343.93	1489.26			0.162999	0.201847	0.299645	0.119513	0.443033	0.506962	0.395879	0.438689			0.0197637	0.0305762	0.0341761	0.0101043	0.0836261	0.113114	0.108332	0.0877321			0.0224895	0.0576912	0.0915684	0.0286345	0.103459	0.146169
1100.59	134.039	3423.84	3292.97	694.219	831.117	1166.17	547.375	1632	1928.74	1356.33	1688.87			563.35	700.248	1035.3	416.506	1501.13	1797.87	1225.46	1558			0.165945	0.206271	0.304966	0.122689	0.442185	0.529594	0.360982	0.458936			0.0227094	0.0349997	0.0394968	0.0132801	0.082778	0.135747	0.0734358	0.107979			0.0258415	0.0660376	0.105824	0.0376344	0.10241	0.175415
1105.6	133.26	3443.95	3313.08	708	794.367	1165.1	541.312	1593.09	1989.95	1753.73	1734.17			577.131	663.498	1034.23	410.443	1462.22	1859.08	1622.86	1603.3			0.170004	0.195445	0.304652	0.120903	0.430724	0.547626	0.478044	0.47228			0.0267689	0.0241743	0.0391837	0.0114943	0.0713167	0.153778	0.190497	0.121323			0.0304608	0.0456122	0.104985	0.0325736	0.0882306	0.198716
1110.6	132.519	3458.24	3327.37	701.094	766.067	1148.35	533.51	1678.39	1918	1712.27	1678.2			570.225	635.198	1017.48	402.641	1547.52	1787.13	1581.4	1547.33			0.16797	0.187109	0.299718	0.118605	0.455851	0.526431	0.465829	0.455794			0.0247346	0.015838	0.0342497	0.00919603	0.0964442	0.132584	0.178283	0.104837			0.0281459	0.0298833	0.0917657	0.0260606	0.119317	0.171328
1115.6	132.247	3468.86	3337.99	703.812	777.317	1176.4	537.062	1607.64	2010.24	1608.47	1735.07			572.943	646.448	1045.53	406.193	1476.77	1879.37	1477.6	1604.2			0.168771	0.190423	0.307979	0.119651	0.435008	0.553602	0.435253	0.472545			0.0255352	0.0191519	0.04251	0.0102424	0.0756012	0.159754	0.147706	0.121588			0.029057	0.036136	0.113898	0.0290258	0.0935312	0.206438
1120.6	132.831	3423.33	3292.46	691.438	765.617	1162.06	529.292	1642.52	1957.69	1343.87	1716.23			560.569	634.748	1031.19	398.422	1511.65	1826.82	1213	1585.36			0.165126	0.186976	0.303756	0.117362	0.445282	0.538123	0.35731	0.466997			0.0218902	0.0157055	0.0382876	0.00795333	0.0858754	0.144275	0.0697637	0.11604			0.0249093	0.0296332	0.102585	0.0225389	0.106242	0.186436
1125.61	133.065	3433.05	3302.18	689.906	815.717	1150.62	534.323	1685.58	2020.26	1355	1756.07			559.037	684.848	1019.76	403.454	1554.71	1889.39	1224.13	1625.2			0.164674	0.201734	0.300387	0.118844	0.457967	0.556555	0.36059	0.478731			0.0214389	0.0304633	0.0349187	0.00943536	0.0985598	0.162707	0.0730431	0.127774			0.0243958	0.0574784	0.0935581	0.0267388	0.121935	0.210254
1130.61	132.987	3383.35	3252.48	694.969	769.35	1188.65	531.479	1626.36	1965.24	1650.3	1718.67			564.1	638.481	1057.78	400.61	1495.49	1834.37	1519.43	1587.8			0.166166	0.188076	0.311587	0.118007	0.440525	0.540346	0.447576	0.467714			0.0229303	0.0168051	0.0461184	0.0085977	0.0811178	0.146498	0.160029	0.116757			0.0260929	0.031708	0.123566	0.024365	0.100356	0.189309
1135.61	132.13	3410.82	3279.96	711.812	812.483	1154.85	532.406	1611.56	1960.81	1281.03	1704.7			580.943	681.614	1023.98	401.537	1480.69	1829.94	1150.16	1573.83			0.171127	0.200782	0.301633	0.11828	0.436164	0.539042	0.338801	0.4636			0.0278918	0.0295107	0.0361644	0.00887077	0.0767573	0.145194	0.0512548	0.112643			0.0317385	0.0556809	0.0968958	0.0251388	0.0949616	0.187624
1140.62	132.091	3396.97	3266.1	707.594	798.867	1175.42	536.844	1639.92	1911.9	1469.83	1671.7			576.725	667.998	1044.55	405.974	1509.05	1781.04	1338.96	1540.83			0.169885	0.196771	0.30769	0.119587	0.444519	0.524636	0.394416	0.453879			0.0266493	0.0254999	0.0422216	0.0101779	0.0851122	0.130788	0.106869	0.102922			0.0303247	0.0481133	0.113125	0.0288432	0.105298	0.169008
1145.62	131.636	3395.82	3264.96	701.062	806.25	1164.69	533.729	1624	1967.02	1479.03	1711.57			570.193	675.381	1033.82	402.86	1493.13	1836.15	1348.16	1580.7			0.16796	0.198945	0.30453	0.11867	0.439828	0.540872	0.397126	0.465623			0.0247251	0.0276747	0.0390612	0.00926048	0.0804215	0.147024	0.109579	0.114666			0.0281352	0.0522167	0.104657	0.0262432	0.0994947	0.189989
1150.62	131.286	3397.89	3267.02	691.719	745.933	1192.58	535.625	1601.56	1845.31	1692.57	1620.33			560.85	615.064	1061.71	404.756	1470.69	1714.44	1561.7	1489.46			0.165208	0.181178	0.312747	0.119228	0.433219	0.505019	0.460026	0.438748			0.021973	0.0099072	0.0472782	0.00981892	0.0738117	0.111171	0.17248	0.087791			0.0250035	0.018693	0.126673	0.0278258	0.0913173	0.143659
1155.62	131.065	3426.87	3296	684.562	774.9	1135.81	528.927	1602.41	1931.14	1193.03	1675.4			553.693	644.031	1004.94	398.058	1471.54	1800.27	1062.16	1544.53			0.1631	0.189711	0.296024	0.117255	0.433468	0.530303	0.312879	0.454969			0.0198648	0.01844	0.0305552	0.00784594	0.0740615	0.136455	0.0253328	0.104012			0.0226045	0.0347926	0.0818671	0.0222346	0.0916263	0.176331
1160.63	132.104	3435.35	3304.48	691.719	777.55	1130.02	533.771	1653	1907.26	1312.17	1665.83			560.85	646.681	999.152	402.901	1522.13	1776.39	1181.3	1534.96			0.165208	0.190491	0.294318	0.118682	0.448371	0.523268	0.347972	0.452151			0.021973	0.0192206	0.0288494	0.00927273	0.0889639	0.12942	0.0604259	0.101194			0.0250035	0.0362655	0.0772966	0.026278	0.110063	0.167241
1165.63	131.883	3438.86	3307.99	696.562	789.967	1129.33	544.958	1706.91	1826.86	1349.33	1603.87			565.693	659.098	998.464	414.089	1576.04	1695.99	1218.46	1473			0.166635	0.194149	0.294115	0.121977	0.464251	0.499584	0.35892	0.433898			0.0233996	0.0228782	0.0286467	0.0125682	0.104844	0.105736	0.0713738	0.0829406			0.0266268	0.0431667	0.0767536	0.035617	0.129709	0.136635
1170.63	130.909	3442.89	3312.02	714.688	810.917	1150.71	531.031	1705.42	1743.19	1323.67	1547.23			583.819	680.048	1019.84	400.162	1574.55	1612.32	1192.8	1416.36			0.171974	0.20032	0.300412	0.117875	0.463813	0.474938	0.35136	0.417215			0.0287389	0.0290494	0.0349431	0.00846574	0.104406	0.0810901	0.0638134	0.0662581			0.0327026	0.0548106	0.0936236	0.023991	0.129168	0.104787
1175.63	131.078	3463.36	3332.5	697.156	826.133	1155.17	533.208	1705.64	1858.5	1619.6	1636.33			566.287	695.264	1024.3	402.339	1574.77	1727.63	1488.73	1505.46			0.16681	0.204802	0.301725	0.118516	0.463876	0.508905	0.438532	0.443461			0.0235746	0.0335316	0.0362566	0.00910704	0.104469	0.115057	0.150986	0.0925041			0.0268259	0.0632675	0.0971428	0.0258084	0.129245	0.148679
1180.64	131.766	3451.76	3320.89	690.812	829.633	1122.81	547.74	1632.41	1765.38	1399.97	1557.93			559.943	698.764	991.943	416.87	1501.54	1634.51	1269.1	1427.06			0.164941	0.205833	0.292195	0.122797	0.442305	0.481475	0.373835	0.420367			0.0217058	0.0345625	0.0267259	0.0133875	0.0828985	0.0876269	0.086289	0.0694099			0.0246995	0.0652128	0.0716069	0.0379387	0.102559	0.113234
1185.64	131.312	3431.54	3300.67	687.594	760.05	1147.85	541.844	1648.06	1843.48	1296.9	1625.5			556.725	629.181	1016.98	410.974	1517.19	1712.61	1166.03	1494.63			0.163993	0.185336	0.299571	0.12106	0.446916	0.504479	0.343475	0.44027			0.0207579	0.0140656	0.0341024	0.0116508	0.0875091	0.110631	0.0559287	0.089313			0.0236208	0.0265391	0.0913711	0.0330171	0.108263	0.142961
1190.64	131.597	3430.64	3299.77	692.656	791.9	1156.4	539.156	1630.62	1783.05	1901.5	1574.77			561.787	661.031	1025.53	408.287	1499.75	1652.18	1770.63	1443.9			0.165484	0.194718	0.302087	0.120268	0.441779	0.486679	0.521571	0.425326			0.022249	0.0234476	0.0366186	0.0108591	0.0823718	0.092831	0.234025	0.0743687			0.0253176	0.0442411	0.0981128	0.0307735	0.101908	0.119959
1195.64	130.377	3504.94	3374.07	712.844	771.983	1154.56	536.198	1657.7	1761.14	1362.2	1549			581.975	641.114	1023.69	405.329	1526.83	1630.27	1231.33	1418.13			0.171431	0.188852	0.301547	0.119397	0.449754	0.480226	0.362711	0.417736			0.0281957	0.0175807	0.0360784	0.00998768	0.0903475	0.0863785	0.075164	0.0667786			0.0320845	0.0331714	0.0966653	0.028304	0.111775	0.111621
1200.65	130.221	3511.35	3380.48	708.094	790.233	1134.73	535.906	1684.23	1832.43	1345.07	1614.67			577.225	659.364	1003.86	405.037	1553.36	1701.56	1214.2	1483.8			0.170032	0.194227	0.295705	0.119311	0.457569	0.501225	0.357664	0.437079			0.0267966	0.0229566	0.0302362	0.00990175	0.0981624	0.107377	0.0701172	0.0861219			0.0304923	0.0433146	0.0810123	0.0280605	0.121443	0.138756
1205.65	130.818	3522.57	3391.7	696.281	796	1147.94	543.104	1620.94	1921.5	1532.03	1680.03			565.412	665.131	1017.07	412.235	1490.07	1790.63	1401.16	1549.16			0.166552	0.195926	0.299596	0.121431	0.438927	0.527462	0.412738	0.456334			0.0233168	0.0246553	0.0341272	0.0120221	0.0795198	0.133615	0.125191	0.105377			0.0265326	0.0465198	0.0914374	0.0340692	0.0983792	0.17266
[truncated: 122 more rows]
[truncated: 4 more columns]

## Sheet: cc.ctd
				FRAP										FRAP-back										FRAP/(un-b)										x-min										x/max
[truncated: 365 more rows]
[truncated: 4 more columns]
