# Supplementary material for: Dissecting the phase separation and oligomerization activities of the carboxysome positioning protein McdB
Source: eLife. 2023 Sep 5;12:e81362. doi: 10.7554/eLife.81362 (PMC10554743; doi:10.7554/eLife.81362)
Supplement: Figure 5—source data 4. [file elife-81362-fig5-data4.xlsx]

## Sheet: raw
	50uM McdB - KCl tit
1			raw	sub.bak			p	s	sum	pr	sr
	P1	1	40918.1	20463.4		50	20463.4	27973.9	48437.3	0.422472	0.577528	1
	S1	2	48428.6	27973.9		100	16562.2	33303	49865.2	0.332139	0.667861	1
	P2	3	35996.5	16562.2		250	23110.1	31284.7	54394.8	0.424859	0.575141	1
	S2	4	52737.3	33303		500	13601.1	36038.7	49639.8	0.273997	0.726003	1
	P3	5	41828.4	23110.1		750	9856.71	36193.4	46050.1	0.214043	0.785957	1
	S3	6	50002.9	31284.7		1000	7270.49	36274.1	43544.6	0.166966	0.833034	1
	P4	7	31239.6	13601.1
	S4	8	53677.2	36038.7
	P5	9	27215.8	9856.71
	S5	10	53552.5	36193.4
	P6	11	24700.8	7270.49
	S6	12	53704.4	36274.1
	B1	13	20454.7
	B2	14	19434.3
	B3	15	18718.2
	B4	16	17638.5
	B5	17	17359.1
	B6	18	17430.3
2			raw	sub.bak			p	s	sum	pr	sr
	P1	1	44986.1	22130.7		50	22130.7	28499.1	50629.8	0.437109	0.562891	1
	S1	2	51354.4	28499.1		100	18520.2	34037	52557.2	0.352382	0.647618	1
	P2	3	39981.6	18520.2		250	25273.9	32623.7	57897.6	0.436528	0.563472	1
	S2	4	55498.4	34037		500	14230.9	37027.1	51257.9	0.277632	0.722368	1
	P3	5	45523.7	25273.9		750	11433.2	37815.7	49248.9	0.232152	0.767848	1
	S3	6	52873.5	32623.7		1000	9394.08	37341.7	46735.8	0.201004	0.798996	1
	P4	7	34012.1	14230.9
	S4	8	56808.3	37027.1
	P5	9	30667.1	11433.2
	S5	10	57049.6	37815.7
	P6	11	29127.5	9394.08
	S6	12	57075.2	37341.7
	B1	13	22855.4
	B2	14	21461.4
	B3	15	20249.8
	B4	16	19781.2
	B5	17	19233.9
	B6	18	19733.5
3			raw	sub.bak			p	s	sum	pr	sr
	P1	1	170.781	80.187		50	80.187	67.896	148.083	0.5415	0.4585	1
	S1	2	158.49	67.896		100	79.296	57.558	136.854	0.57942	0.42058	1
	P2	3	171.09	79.296		250	86.909	66.995	153.904	0.564696	0.435304	1
	S2	4	149.352	57.558		500	70.517	81.476	151.993	0.463949	0.536051	1
	P3	5	181.869	86.909		750	62.41	90.979	153.389	0.406874	0.593126	1
	S3	6	161.955	66.995		1000	71.993	97.913	169.906	0.423723	0.576277	1
	P4	7	162.967	70.517
	S4	8	173.926	81.476
	P5	9	152.459	62.41
	S5	10	181.028	90.979
	P6	11	157.976	71.993
	S6	12	183.896	97.913
	B1	13	90.594
	B2	14	91.794
	B3	15	94.96
	B4	16	92.45
	B5	17	90.049
	B6	18	85.983
	50uM McdB - pH tit
1			raw	sub.bak			p	s	sum	pr	sr
	P1	1	47808.6	27104.4		6.3	27104.4	33203.6	60308	0.449433	0.550567	1
	S1	2	53907.8	33203.6		6.6	26824.3	35695	62519.3	0.429056	0.570944	1
	P2	3	46710.3	26824.3		7.2	16975.4	39384	56359.4	0.301199	0.698801	1
	S2	4	55581	35695		7.7	12992.3	40503.9	53496.3	0.242864	0.757136	1
	P3	5	36172.6	16975.4		8.2	12719.4	40954.2	53673.6	0.236977	0.763023	1
	S3	6	58581.2	39384		8.6	16608.5	42772.4	59380.8	0.279694	0.720306	1
	P4	7	31392.3	12992.3
	S4	8	58904	40503.9
	P5	9	30342.8	12719.4
	S5	10	58577.7	40954.2
	P6	11	33264.3	16608.5
	S6	12	59428.2	42772.4
	B1	13	20704.2
	B2	14	19886
	B3	15	19197.2
	B4	16	18400
	B5	17	17623.4
	B6	18	16655.8
2			raw	sub.bak			p	s	sum	pr	sr
	P1	1	39777.1	21934.5		6.3	21934.5	27075.5	49010	0.447551	0.552449	1
	S1	2	44918.1	27075.5		6.6	19852.3	28821.3	48673.6	0.407866	0.592134	1
	P2	3	37829.2	19852.3		7.2	12327.7	32487.6	44815.3	0.275078	0.724922	1
	S2	4	46798.2	28821.3		7.7	8787.59	32809.9	41597.5	0.211253	0.788747	1
	P3	5	30024.4	12327.7		8.2	9354.09	31799.1	41153.2	0.227299	0.772701	1
	S3	6	50184.4	32487.6		8.6	11360.1	35190.1	46550.2	0.244039	0.755961	1
	P4	7	26520.8	8787.59
	S4	8	50543.2	32809.9
	P5	9	27206.9	9354.09
	S5	10	49651.9	31799.1
	P6	11	28274.5	11360.1
	S6	12	52104.5	35190.1
	B1	13	17842.6
	B2	14	17976.9
	B3	15	17696.7
	B4	16	17733.2
	B5	17	17852.8
	B6	18	16914.4
2			raw	sub.bak			p	s	sum	pr	sr
	P1	1	193.685	103.839		6.3	103.839	32.871	136.71	0.759557	0.240443	1
	S1	2	122.717	32.871		6.6	97.964	59.433	157.397	0.622401	0.377599	1
	P2	3	188.191	97.964		7.2	70.207	60.822	131.029	0.535813	0.464187	1
	S2	4	149.66	59.433		7.7	77.027	96.315	173.342	0.444364	0.555636	1
	P3	5	155.494	70.207		8.2	60.382	107.992	168.374	0.358618	0.641382	1
	S3	6	146.109	60.822		8.6	45.179	118.176	163.355	0.276569	0.723431	1
	P4	7	162.993	77.027
	S4	8	182.281	96.315
	P5	9	146.171	60.382
	S5	10	193.781	107.992
	P6	11	127.862	45.179
	S6	12	200.859	118.176
	B1	13	89.846
	B2	14	90.227
	B3	15	85.287
	B4	16	85.966
	B5	17	85.789
	B6	18	82.683

## Sheet: to graph
kcl	P			S
50	0.422472	0.437109	0.5415	0.577528	0.562891	0.4585
100	0.332139	0.352382	0.57942	0.667861	0.647618	0.42058
250	0.424859	0.436528	0.564696	0.575141	0.563472	0.435304
500	0.273997	0.277632	0.463949	0.726003	0.722368	0.536051
750	0.214043	0.232152	0.406874	0.785957	0.767848	0.593126
1000	0.166966	0.201004	0.423723	0.833034	0.798996	0.576277
pH	P			S
6.3	0.449433	0.447551	0.759557	0.550567	0.552449	0.240443
6.6	0.429056	0.407866	0.622401	0.570944	0.592134	0.377599
7.2	0.301199	0.275078	0.535813	0.698801	0.724922	0.464187
7.7	0.242864	0.211253	0.444364	0.757136	0.788747	0.555636
8.2	0.236977	0.227299	0.358618	0.763023	0.772701	0.641382
8.6	0.279694	0.244039	0.276569	0.720306	0.755961	0.723431
