# Supplementary material for: Dissecting the phase separation and oligomerization activities of the carboxysome positioning protein McdB
Source: eLife. 2023 Sep 5;12:e81362. doi: 10.7554/eLife.81362 (PMC10554743; doi:10.7554/eLife.81362)
Supplement: Figure 5—source data 5. [file elife-81362-fig5-data5.xlsx]

## Sheet: SEC-MALS
vol (ml)	WT UV	WT MW	CTD_all UV	CTD_all MW	IDR_all UV	IDR_all MW
0.002	0		0		0
0.01	0		0		0
0.019	0		0.001		0
0.027	0		0.001		0
0.036	0		0.001		0
0.044	0		0.001		0
0.053	0		0.001		0
0.061	0		0.001		0
0.069	0		0.001		0
0.078	0		0.001		0
0.086	0		0.001		0
0.095	0		0.001		0
0.103	0		0.001		0
0.111	0		0.001		0
0.12	0		0.001		0
0.128	0		0.001		0
0.137	0		0.001		0
0.145	0		0.001		0
0.154	0		0.001		0
0.162	0		0.001		0
0.17	0		0.001		0
0.179	0		0.001		0
0.187	0		0.001		0
0.196	0		0.001		0
0.204	0		0.001		0
0.212	0		0.001		0
0.221	0		0.001		0
0.229	0		0.001		0
0.238	0		0.001		0
0.246	0		0.001		0
0.255	0		0.001		0
0.263	0		0.001		0
0.271	0		0.001		0
0.28	0		0.001		0
0.288	0		0.001		0
0.297	0		0.001		0
0.305	0		0.001		0
0.313	0		0.001		0
0.322	0		0.001		0
0.33	0		0.001		0
0.339	0		0.001		0
0.347	0		0.001		0
0.356	0		0.001		0
0.364	0		0.001		0
0.372	0		0.001		0
0.381	0		0.001		0
0.389	0		0.001		0
0.398	0		0.001		0
0.406	0		0.001		0
0.414	0		0.001		0
0.423	0		0.001		0
0.431	0		0.001		0
0.44	0		0.001		0
0.448	0		0.001		0
0.457	0		0.001		0
0.465	0		0.001		0
0.473	0		0.001		0
0.482	0		0.001		0
0.49	0		0.001		0
0.499	0		0.001		0
0.507	0		0.001		0
0.516	0		0.001		0
0.524	0		0.001		0
0.532	0		0.001		0
0.541	0		0.001		0
0.549	0		0.001		0
0.558	0		0.001		0
0.566	0		0.001		0
0.574	0		0.001		0
0.583	0		0.001		0
0.591	0		0.001		0
0.6	0		0.001		0
0.608	0		0.001		0
0.617	0		0.001		0
0.625	0		0.001		0
0.633	0		0.001		0
0.642	0		0.001		0
0.65	0		0.001		0
0.659	0		0.001		0
0.667	0		0.001		0
0.675	0		0.001		0
0.684	0		0.001		0
0.692	0		0.001		0
0.701	0		0.001		0
0.709	0		0.001		0
0.718	0		0.001		0
0.726	0		0.001		0
0.734	0		0.001		0
0.743	0		0.001		0
0.751	0		0.001		0
0.76	0		0.001		0
0.768	0		0.001		0
0.776	0		0.001		0
0.785	0		0.001		0
0.793	0		0.001		0
0.802	0		0.001		0
0.81	0		0.001		0
0.819	0		0.001		0
0.827	0		0.001		0
0.835	0		0.001		0
0.844	0		0.001		0
0.852	0		0.001		0
0.861	0		0.001		0
0.869	0		0.001		0
0.877	0		0.001		0
0.886	0		0.001		0
0.894	0		0.001		0
0.903	0		0.001		0
0.911	0		0.001		0
0.92	0		0.001		0
0.928	0		0.001		0
0.936	0		0.001		0
0.945	0		0.001		0
0.953	0		0.001		0
0.962	0		0.001		0
0.97	0		0.001		0
0.978	0		0.001		0
0.987	0		0.001		0
0.995	0		0.001		0
1.004	0		0.001		0
1.012	0		0.001		0
1.021	0		0.001		0
1.029	0		0.001		0
1.037	0		0.001		0
1.046	0		0.001		0
1.054	0		0.001		0
1.063	0		0.001		0
1.071	0		0.001		0
1.079	0		0.001		0
1.088	0		0.001		0
1.096	0		0.001		0
1.105	0		0.001		0
1.113	0		0.001		0
1.122	0		0.001		0
1.13	0		0.001		0
1.138	0		0.001		0
1.147	0		0.001		0
1.155	0		0.001		0
1.164	0		0.001		0
1.172	0		0.001		0
1.18	0		0.001		0
1.189	0		0.001		0
1.197	0		0.001		0
1.206	0		0.001		0
1.214	0		0.001		0
1.223	0		0.001		0
1.231	0		0.001		0
1.239	0		0.001		0
1.248	0		0.001		0
1.256	0		0.001		0
1.265	0		0.001		0
1.273	0		0.001		0
1.281	0		0.001		0
1.29	0		0.001		0
1.298	0		0.001		0
1.307	0		0.001		0
1.315	0		0.001		0
1.324	0		0.001		0
1.332	0		0.001		0
1.34	0		0.001		0
1.349	0		0.001		0
1.357	0		0.001		0
1.366	0		0.001		0
1.374	0		0.001		0
1.382	0		0.001		0
1.391	0		0.001		0
1.399	0		0.001		0
1.408	0		0.001		0
1.416	0		0.001		0
1.425	0		0.001		0
1.433	0		0.001		0
1.441	0		0.001		0
1.45	0		0.001		0
1.458	0		0.001		0
1.467	0		0.001		0
1.475	0		0.001		0
1.483	0		0.001		0
1.492	0		0.001		0
1.5	0		0.001		0
1.509	0		0.001		0
1.517	0		0.001		0
1.526	0		0.001		0
1.534	0		0.001		0
1.542	0		0		0
1.551	0		0		0
1.559	0		0		0
1.568	0		0		0
1.576	0		0		0
1.584	0		0		0
1.593	0		0		0
1.601	0		0		0
1.61	0		0		0
1.618	0		0		0
1.627	0		0		0
1.635	0		0		0
1.643	0		0		0
1.652	0		0		0
1.66	0		0		0
1.669	0		0		0
1.677	0		0		0
1.686	0		0		0
1.694	0		0		0
1.702	0		0		0
1.711	0		0		0
1.719	0		0		0
1.728	0		0		0
1.736	0		0		0
1.744	0		0		0
1.753	0		0		0
1.761	0		0		0
1.77	0		0		0
1.778	0		0		0
1.787	0		0		0
1.795	0		0		0
1.803	0		0		0
1.812	0		0		0
1.82	0		0		0
1.829	0		0		0
1.837	0		0		0
1.845	0		0		0
1.854	0		0		0
1.862	0		0		0
1.871	0		0		0
1.879	0		0		0
1.888	0		0		0
1.896	0		0		0
1.904	0		0		0
1.913	0		0		0
1.921	0		0		0
1.93	0		0		0
1.938	0		0		0
1.946	0		0		0
1.955	0		0		0
1.963	0		0		0
1.972	0		0		0
1.98	0		0		0
1.989	0		0		0
1.997	0		0		0
2.005	0		0		0
2.014	0		0		0
2.022	0		0		0
2.031	0		0		0
2.039	0		0		0
2.047	0		0		0
2.056	0		0		0
2.064	0		0		0
2.073	0		0		0
2.081	0		0		0
2.09	0		0		0
2.098	0		0		0
2.106	0		0		0
2.115	0		0		0
2.123	0		0		0
2.132	0		0		0
2.14	0		0		0
2.148	0		0		0
2.157	0		0		0
2.165	0		0		0
2.174	0		0		0
2.182	0		0		0
2.191	0		0		0
2.199	0		0		0
2.207	0		0		0
2.216	0		0		0
2.224	0		0		0
2.233	0		0		0
2.241	0		0		0
2.249	0		0		0
2.258	0		0		0
2.266	0		0		0
2.275	0		0		0
2.283	0		0		0
2.292	0		0		0
2.3	0		0		0
2.308	0		0		0
2.317	0		0		0
2.325	0		0		0
2.334	0		0		0
2.342	0		0		0
2.35	0		0		0
2.359	0		0		0
2.367	0		0		0
2.376	0		0		0
2.384	0		0		0
2.393	0		0		0
2.401	0		0		0
2.409	0		0		0
2.418	0		0		0
2.426	0		0		0
2.435	0		0		0
2.443	0		0		0
2.451	0		0		0
2.46	0		0		0
2.468	0		0		0
2.477	0		0		0
2.485	0		0		0
2.494	0		0		0
2.502	0		0		0
2.51	0		0		0
2.519	0		0		0
2.527	0		0		0
2.536	0		0		0
2.544	0		0		0
2.552	0		0		0
2.561	0		0		0
2.569	0		0		0
2.578	0		0		0
2.586	0		0		0
2.595	0		0		0
2.603	0		0		0
2.611	0		0		0
2.62	0		0		0
2.628	0		0		0
2.637	0		0		0
2.645	0		0		0
2.653	0		0		0
2.662	0		0		0
2.67	0		0		0
2.679	0		0		0
2.687	0		0		0
2.696	0		0		0
2.704	0		0		0
2.712	0		0		0
2.721	0		0		0
2.729	0		0		0
2.738	0		0		0
2.746	0		0		0
2.754	0		0		0
2.763	0		0		0
2.771	0		0		0
2.78	0		0		0
2.788	0		0		0
2.797	0		0		0
2.805	0		0		0
2.813	0		0		0
2.822	0		0		0
2.83	0		0		0
2.839	0		0		0
2.847	0		0		0
2.856	0		0		0
2.864	0		0		0
2.872	0		0		0
2.881	0		0		0
2.889	0		0		0
2.898	0		0		0
2.906	0		0		0
2.914	0		0		0
2.923	0		0		0
2.931	0		0		0
2.94	0		0		0
2.948	0		0		0
2.957	0		0		0
2.965	0		0		0
2.973	0		0		0
2.982	0		0		0
2.99	0		0		0
2.999	0		0		0
3.007	0		0		0
3.015	0		0		0
3.024	0		0		0
3.032	0		0		0
3.041	0		0		0
3.049	0		0		0
3.058	0		0		0
3.066	0		0		0
3.074	0		0		0
3.083	0		0		0
3.091	0		0		0
3.1	0		0		0
3.108	0		0		0
3.116	0		0		0
3.125	0		0		0
3.133	0		0		0
3.142	0		0		0
3.15	0		0		0
3.159	0		0		0
3.167	0		0		0
3.175	0		0		0
3.184	0		0		0
3.192	0		0		0
3.201	0		0		0
3.209	0		0		0
3.217	0		0		0
3.226	0		0		0
3.234	0		0		0
3.243	0		0		0
3.251	0		0		0
3.26	0		0		0
3.268	0		0		0
3.276	0		0		0
3.285	0		0		0
3.293	0		0		0
3.302	0		0		0
3.31	0		0		0
3.318	0		0		0
3.327	0		0		0
3.335	0		0		0
3.344	0		0		0
3.352	0		0		0
3.361	0		0		0
3.369	0		0		0
3.377	0		0		0
3.386	0		0		0
3.394	0		0		0
3.403	0		0		0
3.411	0		0		0
3.419	0		0		0
3.428	0		0		0
3.436	0		0		0
3.445	0		0		0
3.453	0		0		0
3.462	0		0		0
3.47	0		0		0
3.478	0		0		0
3.487	0		0		0
3.495	0		0		0
3.504	0		0		0
3.512	0		0		0
3.52	0		0		0
3.529	0		0		0
3.537	0		0		0
3.546	0		0		0
3.554	0		0		0
3.563	0		0		0
3.571	0		0		0
3.579	0		0		0
3.588	0		0		0
3.596	0		0		0
3.605	0		0		0
3.613	0		0		0
3.621	0		0		0
3.63	0		0		0
3.638	0		0		0
3.647	0		0		0
3.655	0		0		0
3.664	0		0		0
3.672	0		0		0
3.68	0		0		0
3.689	0		0		0
3.697	0		0		0
3.706	0		0		0
3.714	0		0		0
3.722	0		0		0
3.731	0		0		0
3.739	0		0		0
3.748	0		0		0
3.756	0		0		0
3.765	0		0		0
3.773	0		0		0
3.781	0		0		0
3.79	0		0		0
3.798	0		0		0
3.807	0		0		0
3.815	0		0		0
3.823	0		0		0
3.832	0		0		0
3.84	0		0		0
3.849	0		0		0
3.857	0		0		0
3.866	0		0		0
3.874	0		0		0
3.882	0		0		0
3.891	0		0		0
3.899	0		0		0
3.908	0		0		0
3.916	0		0		0
3.925	0		0		0
3.933	0		0		0
3.941	0		0		0
3.95	0		0		0
3.958	0		0		0
3.967	0		0		0
3.975	0		0		0
3.983	0		0		0
3.992	0		0		0
4	0		0		0
4.009	0		0		0
4.017	0		0		0
4.026	0		0		0
4.034	0		0		0
4.042	0		0		0
4.051	0		0		0
4.059	0		0		0
4.068	0		0		0
4.076	0		0		0
4.084	0		0		0
4.093	0		0		0
4.101	0		0		0
4.11	0		0		0
4.118	0		0		0
4.127	0		0		0
4.135	0		0		0
4.143	0		0		0
4.152	0		0		0
4.16	0		0		0
4.169	0		0		0
4.177	0		0		0
4.185	-0.001		0		0
4.194	-0.001		0		0
4.202	-0.001		0		0
4.211	-0.001		0		0
4.219	-0.001		0		0
4.228	-0.001		0		0
4.236	0		0		0
4.244	0		0		0
4.253	0		0		0
4.261	0		0		0
4.27	0		0		0
4.278	0		0		0
4.286	0		0		0
4.295	0		0		0
4.303	0		0		0
4.312	0		0		0
4.32	0		0		0
4.329	0		0		0
4.337	0		0		0
4.345	0		0		0
4.354	0		0		0
4.362	0		0		0
4.371	0		0		0
4.379	0		0		0
4.387	0		0		0
4.396	0		0		0
4.404	0		0		0
4.413	0		0		0
4.421	-0.001		0		0
4.43	-0.001		0		0
4.438	-0.001		0		0
4.446	-0.001		0		0
4.455	-0.001		0		0
4.463	-0.001		0		0
4.472	-0.001		0		0
4.48	-0.001		0		0
4.488	-0.001		0		0
4.497	-0.001		0		0
4.505	-0.001		0		0
4.514	-0.001		0		0
4.522	-0.001		0		0
4.531	-0.001		0		0
4.539	-0.001		0		0
4.547	-0.001		0		0
4.556	-0.001		0		0
4.564	-0.001		0		0
4.573	-0.001		0		0
4.581	-0.001		0		0
4.589	-0.001		0		0
4.598	-0.001		0		0
4.606	-0.001		0		0
4.615	-0.001		0		0
4.623	-0.001		0		0
4.632	-0.001		0		0
4.64	-0.001		0		0
4.648	-0.001		0		0
4.657	-0.001		0		0
4.665	-0.001		0		0
4.674	-0.001		0		0
4.682	-0.001		0		0
4.69	-0.001		0		0
4.699	-0.001		0		0
4.707	-0.001		0		0
4.716	-0.001		0		0
4.724	-0.001		0		0
4.733	-0.001		0		0
4.741	-0.001		0		0
4.749	-0.001		0		0
4.758	-0.001		0		0
4.766	-0.001		0		0
4.775	-0.001		0		0
4.783	-0.001		0		0
4.791	-0.001		0		0
4.8	-0.001		0		0
4.808	-0.001		0		0
4.817	-0.001		0		0
4.825	-0.001		0		0
4.834	-0.001		0		0
4.842	-0.001		0		0
4.85	-0.001		0		0
4.859	-0.001		0		0
4.867	-0.001		0		0
4.876	-0.001		0		0
4.884	-0.001		0		0
4.892	-0.001		0		0
4.901	-0.001		0		0
4.909	-0.001		0		0
4.918	-0.001		0		0
4.926	-0.001		0		0
4.935	-0.001		0		0
4.943	-0.001		0		0
4.951	-0.001		0		0
4.96	-0.001		0		0
4.968	-0.001		0		0
4.977	-0.001		0		0
4.985	-0.001		0		0
4.993	-0.001		0		0
5.002	-0.001		0		0
5.01	-0.001		0		0
5.019	-0.001		0		0
5.027	-0.001		0		0
5.036	-0.001		0		0
5.044	-0.001		0		0
5.052	-0.001		0		0
5.061	-0.001		0		0
5.069	-0.001		0		0
5.078	-0.001		0		0
5.086	-0.001		0		0
5.095	-0.001		0		0
5.103	-0.001		0		0
5.111	-0.001		0		0
5.12	-0.001		0		0
5.128	-0.001		0		0
5.137	-0.001		0		0
5.145	-0.001		0		0
5.153	-0.001		0		0
5.162	-0.001		0		0
5.17	-0.001		0		0
5.179	-0.001		0		0
5.187	-0.001		0		0
5.196	-0.001		0		0
5.204	-0.001		0		0
5.212	-0.001		0		0
5.221	-0.001		0		0
5.229	-0.001		0		0
5.238	-0.001		0		0
5.246	-0.001		0		0
5.254	-0.001		0		0
5.263	-0.001		0		0
5.271	-0.001		0		0
5.28	-0.001		0		0
5.288	-0.001		0		0
5.297	-0.001		0		0
5.305	-0.001		0		0
5.313	-0.001		0		0
5.322	-0.001		0		0
5.33	-0.001		0		0
5.339	-0.001		0		0
5.347	-0.001		0		0
5.355	-0.001		0		0
5.364	-0.001		0		0
5.372	-0.001		0		0
5.381	-0.001		0		0
5.389	-0.001		0		0
5.398	-0.001		0		0
5.406	-0.001		0		0
5.414	-0.001		0		0
5.423	-0.001		0		0
5.431	-0.001		0		0
5.44	-0.001		0		0
5.448	-0.001		0		0
5.456	-0.001		0		0
5.465	-0.001		0		0
5.473	-0.001		0		0
5.482	-0.001		0		0
5.49	-0.001		0		0
5.499	-0.001		0		0
5.507	-0.001		0		0
5.515	-0.001		0		0
5.524	-0.001		0		0
5.532	-0.001		0		0
5.541	-0.001		0		0
5.549	-0.001		0		0
5.557	-0.001		0		0
5.566	-0.001		0		0
5.574	-0.001		0		0
5.583	-0.001		0		0
5.591	-0.001		0		0
5.6	-0.001		0		0
5.608	-0.001		0		0
5.616	-0.001		0		0
5.625	-0.001		0		0
5.633	-0.001		0		0
5.642	-0.001		0		0
5.65	-0.001		0		0
5.658	-0.001		0		0
5.667	-0.001		0		0
5.675	-0.001		0		0
5.684	-0.001		0		0
5.692	-0.001		0		0
5.701	-0.001		0		0
5.709	-0.001		0		0
5.717	-0.001		0		0
5.726	-0.001		0		0
5.734	-0.001		0		0
5.743	-0.001		0		0
5.751	-0.001		0		0
5.759	-0.001		0		0
5.768	-0.001		0		0
5.776	-0.001		0		0
5.785	-0.001		0		0
5.793	-0.001		0		0
5.802	-0.001		0		0
5.81	-0.001		0		0
5.818	-0.001		0		0
5.827	-0.001		0		0
5.835	-0.001		0		0
5.844	-0.001		0		0
5.852	-0.001		0		0
5.86	-0.001		0		0
5.869	-0.001		0		0
5.877	-0.001		0		0
5.886	-0.001		0		0
5.894	-0.001		0		0
5.903	-0.001		0		0
5.911	-0.001		0		0
5.919	-0.001		0		0
5.928	-0.001		0		0
5.936	-0.001		0		0
5.945	-0.001		0		0
5.953	-0.001		0		0
5.961	-0.001		0		0
5.97	-0.001		0		0
5.978	-0.001		0		0
5.987	-0.001		0		0
5.995	-0.001		0		0
6.004	-0.001		0		0
6.012	-0.001		0		0
6.02	-0.001		0		0
6.029	-0.001		0		0
6.037	-0.001		0		0
6.046	-0.001		0		0
6.054	-0.001		0		0
6.062	-0.001		0		0
6.071	-0.001		0		0
6.079	-0.001		0		0
6.088	-0.001		0		0
6.096	-0.001		0		0
6.105	-0.001		0		0
6.113	-0.001		0		0
6.121	-0.001		0		0
6.13	-0.001		0		0
6.138	-0.001		0		0
6.147	-0.001		0		0
6.155	-0.001		0		0
6.163	-0.001		0		0
6.172	-0.001		0		0
6.18	-0.001		0		0
6.189	-0.001		0		0
6.197	-0.001		0		0
6.206	-0.001		0		0
6.214	-0.001		0		0
6.222	-0.001		0		0
6.231	-0.001		0		0
6.239	-0.001		0		0
6.248	-0.001		0		0
6.256	-0.001		0		0
6.265	-0.001		0		0
6.273	-0.001		0		0
6.281	-0.001		0		0
6.29	-0.001		0		0
6.298	-0.001		0		0
6.307	-0.001		0		0
6.315	-0.001		0		0
6.323	-0.001		0		0
6.332	-0.001		0		0
6.34	-0.001		0		0
6.349	-0.001		0		0
6.357	-0.001		0		0
6.366	-0.001		0		0
6.374	-0.001		0		0
6.382	-0.001		0		0
6.391	-0.001		0		0
6.399	-0.001		0		0
6.408	-0.001		0		0
6.416	-0.001		0		0
6.424	-0.001		0		0
6.433	-0.001		0		0
6.441	-0.001		0		0
6.45	-0.001		0		0
6.458	-0.001		0		0
6.467	-0.001		0		0
6.475	-0.001		0		0
6.483	-0.001		0		0
6.492	-0.001		0		0
6.5	-0.001		0		0
6.509	-0.001		0		0
6.517	-0.001		0		0
6.525	-0.001		0		0
6.534	-0.001		0		0
6.542	-0.001		0		0
6.551	-0.001		0		0
6.559	-0.001		0		0
6.568	-0.001		0		0
6.576	-0.001		0		0
6.584	-0.001		0		0
6.593	-0.001		0		0
6.601	-0.001		0		0
6.61	-0.001		0		0
6.618	-0.001		0		0
6.626	-0.001		0		0
6.635	-0.001		0		0
6.643	-0.001		0		0
6.652	-0.001		0		0
6.66	-0.001		0		0
6.669	-0.001		0		0
6.677	-0.001		0		0
6.685	-0.001		0		0
6.694	-0.001		0		0
6.702	-0.001		0		0
6.711	-0.001		0		0
6.719	-0.001		0		0
6.727	-0.001		0		0
6.736	-0.001		0		0
6.744	-0.001		0		0
6.753	-0.001		0		0
6.761	-0.001		0		0
6.77	-0.001		0		0
6.778	-0.001		0		0
6.786	-0.001		0		0
6.795	-0.001		0		0
6.803	-0.001		0		0
6.812	-0.001		0		0
6.82	-0.001		0		0
6.828	-0.001		0		0
6.837	-0.001		0		0
6.845	-0.001		0		0
6.854	-0.001		0		0
6.862	-0.001		0		0
6.871	-0.001		0		0
6.879	-0.001		0		0
6.887	-0.001		0		0
6.896	-0.001		0		0
6.904	-0.001		0		0
6.913	-0.001		0		0
6.921	-0.001		0		0
6.929	-0.001		0		0
6.938	-0.001		0		0
6.946	-0.001		0		0
6.955	-0.001		0		0
6.963	-0.001		0		0
6.972	-0.001		0		0
6.98	-0.001		0		0
6.988	-0.001		0		0
6.997	-0.001		0		0
7.005	-0.001		0		0
7.014	-0.001		0		0
7.022	-0.001		0		0
7.03	-0.001		0		0
7.039	-0.001		0		0
7.047	-0.001		0		0
7.056	-0.001		0		0
7.064	-0.001		0		0
7.073	-0.001		0		0
7.081	-0.001		0		0
7.089	-0.001		0		0
7.098	-0.001		0		0
7.106	-0.001		0		0
7.115	-0.001		0		0
7.123	-0.001		0		0
7.131	-0.001		0		0
7.14	-0.001		0		0
7.148	-0.001		0		0
7.157	-0.001		0		0
7.165	-0.001		0		0
7.174	-0.001		0		0
7.182	-0.001		0		0
7.19	-0.001		0		0
7.199	-0.001		0		0
7.207	-0.001		0		0
7.216	-0.001		0		0
7.224	-0.001		0		0
7.232	-0.001		0		0
7.241	-0.001		0		0
7.249	-0.001		0		0
7.258	-0.001		0		0
7.266	-0.001		0		0
7.275	-0.001		0		0
7.283	-0.001		0		0
7.291	-0.001		0		0
7.3	-0.001		0		0
7.308	-0.001		0		0
7.317	-0.001		0		0
7.325	-0.001		0		0
7.333	-0.001		0		0
7.342	-0.001		0		0
7.35	-0.001		0		0
7.359	-0.001		0		0
7.367	-0.001		0		0
7.376	-0.001		0		0
7.384	-0.001		0		0
7.392	-0.001		0		0
7.401	-0.001		0		0
7.409	-0.001		0		0
7.418	-0.001		0		0
7.426	-0.001		0		0
7.435	-0.001		0		0
7.443	-0.001		0		0
7.451	-0.001		0		0
7.46	-0.001		0		0
7.468	-0.001		0		0
7.477	-0.001		0		0
7.485	-0.001		0		0
7.493	-0.001		0		0
7.502	-0.001		0		0
7.51	-0.001		0		0
7.519	-0.001		0		0
7.527	-0.001		0		0
7.536	-0.001		0		0
7.544	-0.001		0		0
7.552	-0.001		0		0
7.561	-0.001		0		0
7.569	-0.001		0		0
7.578	-0.001		0		0
7.586	-0.001		0		0
7.594	-0.001		0		0
7.603	-0.001		0		0
7.611	-0.001		0		0
7.62	-0.001		0		0
7.628	-0.001		0		0
7.637	-0.001		0		0
7.645	-0.001		0		0
7.653	-0.001		0		0
7.662	-0.001		0		0
7.67	-0.001		0		0
7.679	-0.001		0		0
7.687	-0.001		0		0
7.695	-0.001		0		0
7.704	-0.001		0		0
7.712	-0.001		0		0
7.721	-0.001		0		0
7.729	-0.001		0		0
7.738	-0.001		0		0
7.746	-0.001		0		0
7.754	-0.001		0		0
7.763	-0.001		0		0
7.771	-0.001		0		0
7.78	-0.001		0		0
7.788	-0.001		0		0
7.796	-0.001		0		0
7.805	-0.001		0		0
7.813	-0.001		0		0
7.822	-0.001		0		0
7.83	-0.001		0		0
7.839	-0.001		0		0
7.847	-0.001		0		0
7.855	-0.001		0		0
7.864	-0.001		0		0
7.872	-0.001		0		0
7.881	-0.001		0		0
7.889	-0.001		0		0
7.897	-0.001		0		0
7.906	-0.001		0		0
7.914	-0.001		0		0
7.923	-0.001		0		0
7.931	-0.001		0		0
7.94	-0.001		0		0
7.948	-0.001		0		0
7.956	-0.001		0		0
7.965	-0.001		0		0
7.973	-0.001		0		0
7.982	-0.001		0		0
7.99	-0.001		0		0
7.998	-0.001		0		0
8.007	-0.001		0		0
8.015	-0.001		0		0
8.024	-0.001		0		0
8.032	-0.001		0		0
8.041	-0.001		0		0
8.049	-0.001		0		0
8.057	-0.001		0		0
8.066	-0.001		0		0
8.074	-0.001		0		0
8.083	-0.001		0		0
8.091	-0.001		0		0
8.099	-0.001		0		0
8.108	-0.001		0		0
8.116	-0.001		0		0
8.125	-0.001		0		0
8.133	-0.001		0		0
8.142	-0.001		0		0
8.15	-0.001		0		0
8.158	-0.001		0		0
8.167	-0.001		0		0
8.175	-0.001		0		0
8.184	-0.001		0		0
8.192	-0.001		0		0
8.2	-0.001		0		0
8.209	-0.001		0		0
8.217	-0.001		0		0
8.226	-0.001		0		0
8.234	0		0		0
8.243	0		0		0
8.251	0		0		0
8.259	0		0		0
8.268	0		0		0
8.276	0		0		0
8.285	0		0		0
8.293	0		0		0
8.301	0		0		0
8.31	0		0.001		0
8.318	0		0.001		0
8.327	0		0.001		0
8.335	0		0.001		0
8.344	0		0.001		0
8.352	0.001		0.001		0
8.36	0.001		0.001		0
8.369	0.001		0.001		0
8.377	0.001		0.001		0
8.386	0.001		0.001		0
8.394	0.001		0.001		0
8.402	0.001		0.001		0
8.411	0.001		0.001		0
8.419	0.001		0.002		0
8.428	0.001		0.002		0
8.436	0.001		0.002		0
8.445	0.001		0.002		0
8.453	0.001		0.002		0
8.461	0.001		0.002		0
8.47	0.001		0.002		0
8.478	0.001		0.002		0
8.487	0.001		0.002		0
8.495	0.001		0.002		0
8.504	0.002		0.002		0
8.512	0.002		0.002		0
8.52	0.002		0.002		0
8.529	0.002		0.002		0
8.537	0.002		0.002		0
8.546	0.002		0.002		0
8.554	0.002		0.002		0
8.562	0.002		0.002		0
8.571	0.002		0.002		0
8.579	0.002		0.002		0
8.588	0.002		0.002		0
8.596	0.002		0.002		0
8.605	0.002		0.002		0
8.613	0.002		0.002		0
8.621	0.002		0.002		0
8.63	0.002		0.002		0
8.638	0.002		0.002		0
8.647	0.002		0.002		0
8.655	0.002		0.002		0
8.663	0.002		0.002		0
8.672	0.002		0.002		0
8.68	0.002		0.002		0
8.689	0.002		0.002		0
8.697	0.002		0.002		0
8.706	0.002		0.002		0
8.714	0.002		0.002		0
8.722	0.002		0.002		0
8.731	0.002		0.003		0
8.739	0.002		0.003		0
8.748	0.002		0.003		0
8.756	0.002		0.003		0
8.764	0.002		0.003		0
8.773	0.002		0.003		0
8.781	0.002		0.003		0
8.79	0.002		0.003		0
8.798	0.002		0.003		0
8.807	0.002		0.003		0
8.815	0.002		0.003		0
8.823	0.002		0.003		0
8.832	0.002		0.003		0
8.84	0.002		0.003		0
8.849	0.002		0.003		0
8.857	0.002		0.003		0
8.865	0.002		0.003		0
8.874	0.002		0.003		0
8.882	0.002		0.003		0
8.891	0.002		0.003		0
8.899	0.002		0.003		0
8.908	0.002		0.003		0
8.916	0.002		0.003		0
8.924	0.002		0.003		0
8.933	0.002		0.003		0
8.941	0.002		0.003		0
8.95	0.002		0.003		0
8.958	0.002		0.003		0
8.966	0.002		0.003		0
8.975	0.002		0.003		0
8.983	0.002		0.003		0
8.992	0.002		0.003		0
9	0.002		0.003		0
9.009	0.002		0.003		0
9.017	0.002		0.003		0
9.025	0.002		0.002		0
9.034	0.002		0.002		0
9.042	0.002		0.002		0
9.051	0.002		0.002		0
9.059	0.002		0.002		0
9.067	0.002		0.002		0
9.076	0.002		0.002		0
9.084	0.002		0.002		0
9.093	0.002		0.002		0
9.101	0.002		0.002		0
9.11	0.002		0.002		0
9.118	0.002		0.002		0
9.126	0.002		0.002		0
9.135	0.002		0.002		0
9.143	0.002		0.002		0
9.152	0.002		0.002		0
9.16	0.002		0.002		0
9.168	0.002		0.002		0
9.177	0.002		0.002		0
9.185	0.002		0.002		0
9.194	0.002		0.002		0
9.202	0.002		0.002		0
9.211	0.002		0.002		0
9.219	0.002		0.002		0
9.227	0.002		0.002		0
9.236	0.002		0.002		0
9.244	0.002		0.002		0
9.253	0.002		0.002		0
9.261	0.002		0.002		0
9.269	0.002		0.002		0
9.278	0.002		0.002		0
9.286	0.002		0.002		0
9.295	0.002		0.002		0
9.303	0.002		0.002		0
9.312	0.002		0.002		0
9.32	0.002		0.002		0
9.328	0.002		0.002		0
9.337	0.002		0.002		0
9.345	0.002		0.002		0
9.354	0.002		0.002		0
9.362	0.002		0.002		0
9.37	0.002		0.002		0
9.379	0.002		0.002		0
9.387	0.002		0.002		0
9.396	0.002		0.002		0
9.404	0.002		0.002		0
9.413	0.002		0.002		0
9.421	0.002		0.002		0
9.429	0.002		0.002		0
9.438	0.002		0.002		0
9.446	0.002		0.002		0
9.455	0.002		0.002		0
9.463	0.002		0.003		0
9.471	0.002		0.003		0
9.48	0.002		0.003		0
9.488	0.002		0.003		0
9.497	0.002		0.003		0
9.505	0.002		0.003		0
9.514	0.002		0.003		0
9.522	0.002		0.003		0
9.53	0.002		0.003		0
9.539	0.002		0.003		0
9.547	0.002		0.003		0
9.556	0.002		0.003		0
9.564	0.002		0.003		0
9.572	0.002		0.003		0
9.581	0.002		0.003		0
9.589	0.002		0.003		0
9.598	0.002		0.003		0
9.606	0.002		0.003		0
9.615	0.002		0.003		0
9.623	0.002		0.003		0
9.631	0.002		0.003		0
9.64	0.002		0.003		0
9.648	0.002		0.003		0
9.657	0.002		0.003		0
9.665	0.002		0.003		0
9.674	0.002		0.003		0
9.682	0.002		0.003		0
9.69	0.002		0.003		0
9.699	0.002		0.003		0
9.707	0.002		0.003		0
9.716	0.002		0.003		0
9.724	0.002		0.003		0
9.732	0.002		0.003		0
9.741	0.002		0.003		0
9.749	0.002		0.003		0
9.758	0.002		0.003		0
9.766	0.002		0.003		0
9.775	0.001		0.003		0
9.783	0.001		0.003		0
9.791	0.001		0.003		0
9.8	0.001		0.003		0
9.808	0.001		0.003		0
9.817	0.001		0.003		0
9.825	0.001		0.003		0
9.833	0.001		0.003		0
9.842	0.001		0.003		0
9.85	0.001		0.003		0
9.859	0.001		0.003		0
9.867	0.001		0.003		0
9.876	0.001		0.003		0
9.884	0.001		0.003		0
9.892	0.001		0.003		0
9.901	0.001		0.003		0
9.909	0.001		0.003		0
9.918	0.001		0.003		0
9.926	0.001		0.003		0
9.934	0.001		0.003		0
9.943	0.001		0.003		0
9.951	0.001		0.003		0
9.96	0.001		0.003		0
9.968	0.001		0.003		0
9.977	0.001		0.003		0
9.985	0.001		0.003		0
9.993	0.001		0.003		0
10.002	0.001		0.003		0
10.01	0.001		0.003		0
10.019	0.001		0.003		0
10.027	0.001		0.003		0
10.035	0.001		0.003		0
10.044	0.001		0.003		0
10.052	0.001		0.003		0
10.061	0.001		0.003		0
10.069	0.001		0.003		0
10.078	0.001		0.003		0
10.086	0.001		0.003		0
10.094	0.001		0.003		0
10.103	0.001		0.003		0
10.111	0.001		0.003		0
10.12	0.001		0.003		0
10.128	0.001		0.003		0
10.136	0.001		0.003		0
10.145	0.001		0.003		0
10.153	0.001		0.003		0
10.162	0.001		0.003		0
10.17	0.002		0.003		0
10.179	0.002		0.003		0
10.187	0.002		0.003		0
10.195	0.002		0.003		0
10.204	0.002		0.003		0
10.212	0.001		0.003		0
10.221	0.001		0.003		0
10.229	0.001		0.003		0
10.237	0.001		0.003		0
10.246	0.001		0.003		0
10.254	0.001		0.003		0
10.263	0.001		0.003		0
10.271	0.001		0.003		0
10.28	0.001		0.003		0
10.288	0.001		0.003		0
10.296	0.001		0.003		0
10.305	0.001		0.003		0
10.313	0.001		0.003		0
10.322	0.001		0.003		0
10.33	0.001		0.003		0.001
10.338	0.001		0.003		0.001
10.347	0.001		0.003		0.001
10.355	0.001		0.003		0.001
10.364	0.001		0.003		0.001
10.372	0.001		0.003		0.001
10.381	0.001		0.003		0.001
10.389	0.001		0.003		0.001
10.397	0.001		0.003		0.001
10.406	0.001		0.003		0.001
10.414	0.001		0.003		0.001
10.423	0.001		0.003		0.001
10.431	0.001		0.003		0.001
10.439	0.001		0.003		0.001
10.448	0.001		0.003		0.002
10.456	0.001		0.003		0.002
10.465	0.001		0.003		0.002
10.473	0.001		0.003		0.002
10.482	0.001		0.003		0.002
10.49	0.001		0.003		0.002
10.498	0.002		0.003		0.002
10.507	0.002		0.003		0.002
10.515	0.002		0.003		0.002
10.524	0.002		0.003		0.002
10.532	0.002		0.003		0.002
10.54	0.002		0.003		0.002
10.549	0.002		0.003		0.002
10.557	0.002		0.003		0.002
10.566	0.002		0.003		0.002
10.574	0.002		0.003		0.002
10.583	0.001		0.003		0.002
10.591	0.001		0.003		0.002
10.599	0.001		0.003		0.002
10.608	0.001		0.003		0.002
10.616	0.001		0.003		0.002
10.625	0.001		0.003		0.002
10.633	0.001		0.003		0.002
10.641	0.001		0.003		0.002
10.65	0.001		0.003		0.002
10.658	0.001		0.003		0.002
10.667	0.001		0.003		0.002
10.675	0.001		0.003		0.002
10.684	0.001		0.003		0.002
10.692	0.001		0.003		0.002
10.7	0.001		0.003		0.002
10.709	0.001		0.003		0.002
10.717	0.001		0.003		0.002
10.726	0.001		0.003		0.002
10.734	0.001		0.003		0.002
10.742	0.001		0.003		0.002
10.751	0.001		0.003		0.002
10.759	0.001		0.003		0.002
10.768	0.001		0.003		0.002
10.776	0.001		0.003		0.002
10.785	0.001		0.003		0.002
10.793	0.001		0.003		0.002
10.801	0.001		0.003		0.002
10.81	0.001		0.003		0.002
10.818	0.001		0.003		0.002
10.827	0.001		0.003		0.002
10.835	0.001		0.003		0.002
10.844	0.001		0.003		0.002
10.852	0.001		0.003		0.002
10.86	0.001		0.003		0.002
10.869	0.001		0.003		0.002
10.877	0.001		0.003		0.002
10.886	0.001		0.004		0.002
10.894	0.001		0.004		0.002
10.902	0.001		0.004		0.002
10.911	0.001		0.004		0.002
10.919	0.001		0.004		0.002
10.928	0.001		0.004		0.002
10.936	0.001		0.004		0.002
10.945	0.001		0.004		0.002
10.953	0.001		0.004		0.002
10.961	0.001		0.004		0.002
10.97	0.002		0.004		0.002
10.978	0.002		0.004		0.002
10.987	0.002		0.005		0.002
10.995	0.002		0.005		0.002
11.003	0.002		0.005		0.003
11.012	0.002		0.005		0.003
11.02	0.002		0.005		0.003
11.029	0.002		0.005		0.003
11.037	0.002		0.005		0.003
11.046	0.002		0.005		0.003
11.054	0.002		0.005		0.003
11.062	0.002		0.005		0.003
11.071	0.002		0.005		0.003
11.079	0.003		0.005		0.003
11.088	0.003		0.005		0.003
11.096	0.003		0.005		0.003
11.104	0.003		0.005		0.003
11.113	0.003		0.005		0.003
11.121	0.003		0.005		0.003
11.13	0.003		0.005		0.003
11.138	0.003		0.005		0.003
11.147	0.003		0.005		0.003
11.155	0.003		0.005		0.003
11.163	0.003		0.005		0.003
11.172	0.003		0.005		0.003
11.18	0.003		0.005		0.003
11.189	0.004		0.005		0.003
11.197	0.004		0.005		0.003
11.205	0.004		0.005		0.003
11.214	0.004		0.005		0.003
11.222	0.004		0.005		0.003
11.231	0.004		0.005		0.003
11.239	0.004		0.005		0.003
11.248	0.004		0.005		0.003
11.256	0.004		0.006		0.003
11.264	0.004		0.006		0.003
11.273	0.005		0.006		0.003
11.281	0.005		0.006		0.003
11.29	0.005		0.006		0.003
11.298	0.005		0.006		0.004
11.306	0.005		0.006		0.004
11.315	0.005		0.006		0.004
11.323	0.005		0.006		0.004
11.332	0.005		0.006		0.004
11.34	0.005		0.006		0.004
11.349	0.006		0.006		0.005
11.357	0.006		0.006		0.005
11.365	0.006		0.006		0.005
11.374	0.006		0.006		0.005
11.382	0.006		0.007		0.005
11.391	0.006		0.007		0.006
11.399	0.006		0.007		0.006
11.407	0.006		0.007		0.006
11.416	0.006		0.007		0.006
11.424	0.006		0.007		0.007
11.433	0.006		0.007		0.007
11.441	0.006		0.007		0.007
11.45	0.007		0.007		0.008
11.458	0.007		0.007		0.008
11.466	0.007		0.007		0.009
11.475	0.007		0.007		0.009
11.483	0.007		0.008		0.01
11.492	0.007		0.008		0.01
11.5	0.007		0.008		0.011
11.508	0.007		0.008		0.012
11.517	0.008		0.008		0.012
11.525	0.008		0.008		0.013
11.534	0.008		0.008		0.014
11.542	0.008		0.008		0.015
11.551	0.008		0.008		0.016
11.559	0.008		0.008		0.017
11.567	0.008		0.008		0.018
11.576	0.008		0.008		0.019
11.584	0.008		0.008		0.02
11.593	0.008		0.008		0.021
11.601	0.009		0.008		0.023
11.609	0.009		0.008		0.024
11.618	0.009		0.008		0.026
11.626	0.009		0.008		0.027
11.635	0.009		0.008		0.029
11.643	0.009		0.009		0.031
11.652	0.009		0.009		0.033
11.66	0.009		0.009		0.035
11.668	0.009		0.009		0.038
11.677	0.01		0.009		0.04
11.685	0.01		0.009		0.043
11.694	0.01		0.009		0.045
11.702	0.01		0.009		0.048
11.71	0.01		0.009		0.051
11.719	0.01		0.009		0.055
11.727	0.01		0.01		0.058
11.736	0.01		0.01		0.062
11.744	0.011		0.01		0.066
11.753	0.011		0.01		0.07
11.761	0.011		0.01		0.074
11.769	0.011		0.01		0.079
11.778	0.011		0.01		0.084
11.786	0.011		0.01		0.089
11.795	0.012		0.01		0.094
11.803	0.012		0.01		0.1
11.811	0.012		0.01		0.105
11.82	0.012		0.011		0.112
11.828	0.012		0.011		0.118
11.837	0.012		0.011		0.125
11.845	0.013		0.011		0.132
11.854	0.013		0.011		0.139
11.862	0.013		0.011		0.147
11.87	0.013		0.011		0.155
11.879	0.013		0.011		0.163
11.887	0.014		0.011		0.172
11.896	0.014		0.012		0.181
11.904	0.014		0.012		0.19
11.912	0.014		0.012		0.2
11.921	0.015		0.012		0.21
11.929	0.015		0.012		0.22
11.938	0.015		0.012		0.231
11.946	0.015		0.012		0.242
11.955	0.016		0.012		0.254
11.963	0.016		0.012		0.266
11.971	0.016		0.013		0.278
11.98	0.017		0.013		0.29
11.988	0.017		0.013		0.303
11.997	0.017		0.013		0.316
12.005	0.018		0.013		0.33
12.014	0.018		0.013		0.344
12.022	0.019		0.013		0.358
12.03	0.019		0.013		0.372
12.039	0.02		0.014		0.387
12.047	0.02		0.014		0.402
12.056	0.021		0.014		0.417
12.064	0.021		0.014		0.433
12.072	0.022		0.014		0.449
12.081	0.022		0.014		0.465
12.089	0.023		0.014		0.481
12.098	0.024		0.015		0.497
12.106	0.025		0.015		0.513
12.115	0.025		0.015		0.53
12.123	0.026		0.015		0.547
12.131	0.027		0.015		0.563
12.14	0.028		0.015		0.58
12.148	0.029		0.015		0.597
12.157	0.03		0.016		0.614
12.165	0.031		0.016		0.631
12.173	0.032		0.016		0.648
12.182	0.033		0.016		0.664
12.19	0.034		0.016		0.681
12.199	0.036		0.016		0.697
12.207	0.037		0.016		0.714
12.216	0.039		0.017		0.73
12.224	0.04		0.017		0.746
12.232	0.042		0.017		0.761
12.241	0.044		0.017		0.776
12.249	0.046		0.017		0.791
12.258	0.047		0.017		0.806
12.266	0.05		0.018		0.82
12.274	0.052		0.018		0.834
12.283	0.054		0.018		0.848
12.291	0.056		0.018		0.861	95712.9
12.3	0.059		0.018		0.873	95783.8
12.308	0.062		0.019		0.885	95866.3
12.317	0.065		0.019		0.897	95953.8
12.325	0.068		0.019		0.908	96043.9
12.333	0.071		0.019		0.918	96137.8
12.342	0.074		0.019		0.928	96117.5
12.35	0.078		0.019		0.937	96074.4
12.359	0.081		0.02		0.946	96091.1
12.367	0.085		0.02		0.954	96134.8
12.375	0.089		0.02		0.962	96146.9
12.384	0.094		0.02		0.968	96142.9
12.392	0.098		0.02		0.974	96078.1
12.401	0.103		0.021		0.98	95990.4
12.409	0.108		0.021		0.985	95917.3
12.418	0.113		0.021		0.989	95901
12.426	0.119		0.021		0.992	95927.2
12.434	0.125		0.022		0.995	95958.7
12.443	0.131		0.022		0.997	95986.6
12.451	0.137		0.022		0.999	96006.5
12.46	0.144		0.022		1	95999.8
12.468	0.151		0.022		1	96000.8
12.476	0.158		0.023		1	96096.1
12.485	0.166		0.023		0.999	96179.1
12.493	0.173		0.023		0.997	96132.9
12.502	0.182		0.023		0.995	96145.4
12.51	0.19		0.024		0.992	96139.6
12.519	0.199		0.024		0.988	96098.1
12.527	0.208		0.024		0.984	96187
12.535	0.218		0.024		0.98	96251.6
12.544	0.228		0.025		0.975	96232.5
12.552	0.238		0.025		0.969	96263.3
12.561	0.249		0.025		0.963	96251.2
12.569	0.26		0.025		0.957	96237.7
12.577	0.272		0.026		0.95	96217.4
12.586	0.283		0.026		0.943	95708.6
12.594	0.295		0.026		0.935
12.603	0.308		0.027		0.927
12.611	0.321		0.027		0.918
12.62	0.334		0.027		0.909
12.628	0.348		0.027		0.9
12.636	0.361		0.028		0.891
12.645	0.376		0.028		0.881
12.653	0.39		0.028		0.871
12.662	0.405		0.029		0.861
12.67	0.42		0.029		0.851
12.678	0.435		0.029		0.84
12.687	0.451		0.03		0.829
12.695	0.467		0.03		0.818
12.704	0.483		0.03		0.807
12.712	0.499		0.031		0.796
12.721	0.515		0.031		0.785
12.729	0.531		0.031		0.774
12.737	0.548		0.032		0.762
12.746	0.565		0.032		0.751
12.754	0.581		0.032		0.74
12.763	0.598		0.033		0.728
12.771	0.615		0.033		0.717
12.779	0.632		0.033		0.706
12.788	0.648		0.034		0.694
12.796	0.665		0.034		0.683
12.805	0.681		0.034		0.672
12.813	0.697		0.035		0.66
12.822	0.714		0.035		0.649
12.83	0.729		0.036		0.638
12.838	0.745		0.036		0.627
12.847	0.76		0.036		0.617
12.855	0.775		0.037		0.606
12.864	0.79	94875.2	0.037		0.595
12.872	0.805	95402.8	0.038		0.585
12.88	0.819	95891	0.038		0.574
12.889	0.832	96157.6	0.038		0.564
12.897	0.845	96163	0.039		0.554
12.906	0.858	95879.6	0.039		0.544
12.914	0.87	95324.2	0.04		0.534
12.923	0.882	94992.9	0.04		0.525
12.931	0.893	95515.1	0.04		0.515
12.939	0.904	95862.1	0.041		0.506
12.948	0.914	95966.3	0.041		0.496
12.956	0.924	95873.2	0.042		0.487
12.965	0.933	95793.5	0.042		0.478
12.973	0.942	95816.7	0.043		0.47
12.981	0.95	95842.6	0.043		0.461
12.99	0.957	95873	0.043		0.453
12.998	0.964	95973.6	0.044		0.444
13.007	0.97	96168.7	0.044		0.436
13.015	0.976	96384.1	0.045		0.428
13.024	0.981	96616.6	0.045		0.42
13.032	0.985	96776.6	0.046		0.413
13.04	0.989	96849.4	0.046		0.405
13.049	0.992	96804	0.047		0.398
13.057	0.995	96785.1	0.047		0.39
13.066	0.997	96886.1	0.048		0.383
13.074	0.999	96835.2	0.048		0.376
13.082	1	96601.1	0.049		0.369
13.091	1	96271.8	0.049		0.362
13.099	1	96043	0.05		0.356
13.108	0.999	96002.8	0.05		0.349
13.116	0.998	96137.4	0.051		0.343
13.125	0.996	96329.9	0.051		0.337
13.133	0.994	96554.7	0.052		0.331
13.141	0.991	96603.3	0.052		0.325
13.15	0.988	96761.9	0.053		0.319
13.158	0.985	96972	0.054		0.313
13.167	0.98	97103.4	0.054		0.307
13.175	0.976	97177.7	0.055		0.302
13.184	0.971	97235.1	0.055		0.296
13.192	0.966	97390.5	0.056		0.291
13.2	0.96	97313.2	0.056		0.286
13.209	0.954	97359.2	0.057		0.281
13.217	0.948	97505.4	0.058		0.276
13.226	0.941	97300.5	0.058		0.271
13.234	0.934	96740.8	0.059		0.266
13.242	0.926	96162.1	0.06		0.261
13.251	0.919	95903.6	0.06		0.256
13.259	0.911		0.061		0.252
13.268	0.902		0.061		0.247
13.276	0.894		0.062		0.243
13.285	0.885		0.063		0.238
13.293	0.876		0.063		0.234
13.301	0.867		0.064		0.23
13.31	0.858		0.065		0.225
13.318	0.849		0.066		0.221
13.327	0.839		0.066		0.217
13.335	0.829		0.067		0.213
13.343	0.82		0.068		0.209
13.352	0.81		0.069		0.206
13.36	0.8		0.069		0.202
13.369	0.79		0.07		0.198
13.377	0.779		0.071		0.194
13.386	0.769		0.072		0.191
13.394	0.759		0.072		0.187
13.402	0.749		0.073		0.184
13.411	0.738		0.074		0.18
13.419	0.728		0.075		0.177
13.428	0.717		0.076		0.174
13.436	0.707		0.077		0.171
13.444	0.697		0.078		0.167
13.453	0.686		0.078		0.164
13.461	0.676		0.079		0.161
13.47	0.666		0.08		0.158
13.478	0.656		0.081		0.155
13.487	0.646		0.082		0.152
13.495	0.636		0.083		0.149
13.503	0.626		0.084		0.146
13.512	0.616		0.085		0.144
13.52	0.606		0.086		0.141
13.529	0.596		0.087		0.138
13.537	0.587		0.088		0.135
13.545	0.577		0.089		0.133
13.554	0.568		0.09		0.13
13.562	0.558		0.091		0.128
13.571	0.549		0.092		0.125
13.579	0.54		0.094		0.123
13.588	0.531		0.095		0.12
13.596	0.522		0.096		0.118
13.604	0.514		0.097		0.116
13.613	0.505		0.098		0.113
13.621	0.497		0.099		0.111
13.63	0.488		0.1		0.109
13.638	0.48		0.101		0.107
13.646	0.472		0.103		0.105
13.655	0.464		0.104		0.103
13.663	0.456		0.105		0.101
13.672	0.449		0.106		0.099
13.68	0.441		0.107		0.097
13.689	0.434		0.109		0.095
13.697	0.426		0.11		0.093
13.705	0.419		0.111		0.091
13.714	0.412		0.112		0.089
13.722	0.405		0.113		0.088
13.731	0.399		0.115		0.086
13.739	0.392		0.116		0.084
13.747	0.386		0.117		0.083
13.756	0.379		0.118		0.081
13.764	0.373		0.119		0.079
13.773	0.367		0.121		0.078
13.781	0.361		0.122		0.076
13.79	0.355		0.123		0.075
13.798	0.349		0.124		0.073
13.806	0.344		0.125		0.072
13.815	0.338		0.127		0.071
13.823	0.333		0.128		0.069
13.832	0.328		0.129		0.068
13.84	0.323		0.13		0.067
13.848	0.317		0.131		0.065
13.857	0.313		0.132		0.064
13.865	0.308		0.134		0.063
13.874	0.303		0.135		0.062
13.882	0.298		0.136		0.061
13.891	0.294		0.137		0.059
13.899	0.289		0.138		0.058
13.907	0.285		0.139		0.057
13.916	0.281		0.14		0.056
13.924	0.276		0.142		0.055
13.933	0.272		0.143		0.054
13.941	0.268		0.144		0.053
13.949	0.264		0.145		0.052
13.958	0.26		0.146		0.051
13.966	0.257		0.147		0.05
13.975	0.253		0.148		0.05
13.983	0.249		0.149		0.049
13.992	0.246		0.15		0.048
14	0.242		0.151		0.047
14.008	0.239		0.152		0.046
14.017	0.236		0.153		0.045
14.025	0.232		0.154		0.045
14.034	0.229		0.155		0.044
14.042	0.226		0.156		0.043
14.05	0.223		0.157		0.042
14.059	0.22		0.159		0.042
14.067	0.217		0.16		0.041
14.076	0.214		0.161		0.04
14.084	0.211		0.162		0.04
14.093	0.208		0.163		0.039
14.101	0.206		0.164		0.039
14.109	0.203		0.165		0.038
14.118	0.2		0.166		0.037
14.126	0.198		0.167		0.037
14.135	0.195		0.168		0.036
14.143	0.193		0.169		0.036
14.151	0.19		0.17		0.035
14.16	0.188		0.171		0.035
14.168	0.185		0.172		0.034
14.177	0.183		0.173		0.034
14.185	0.181		0.174		0.033
14.194	0.178		0.175		0.033
14.202	0.176		0.176		0.032
14.21	0.174		0.177		0.032
14.219	0.172		0.178		0.031
14.227	0.17		0.18		0.031
14.236	0.168		0.181		0.031
14.244	0.166		0.182		0.03
14.253	0.164		0.183		0.03
14.261	0.162		0.184		0.03
14.269	0.16		0.186		0.029
14.278	0.158		0.187		0.029
14.286	0.156		0.188		0.029
14.295	0.154		0.189		0.028
14.303	0.153		0.191		0.028
14.311	0.151		0.192		0.028
14.32	0.149		0.194		0.027
14.328	0.148		0.195		0.027
14.337	0.146		0.196		0.027
14.345	0.144		0.198		0.026
14.354	0.143		0.199		0.026
14.362	0.141		0.201		0.026
14.37	0.14		0.203		0.026
14.379	0.138		0.204		0.025
14.387	0.137		0.206		0.025
14.396	0.135		0.208		0.025
14.404	0.134		0.209		0.025
14.412	0.133		0.211		0.025
14.421	0.131		0.213		0.024
14.429	0.13		0.215		0.024
14.438	0.129		0.217		0.024
14.446	0.127		0.219		0.024
14.455	0.126		0.221		0.024
14.463	0.125		0.223		0.024
14.471	0.124		0.225		0.024
14.48	0.123		0.228		0.023
14.488	0.122		0.23		0.023
14.497	0.121		0.232		0.023
14.505	0.119		0.235		0.023
14.513	0.118		0.238		0.023
14.522	0.117		0.24		0.023
14.53	0.116		0.243		0.023
14.539	0.115		0.246		0.023
14.547	0.115		0.249		0.023
14.556	0.114		0.251		0.023
14.564	0.113		0.255		0.022
14.572	0.112		0.258		0.022
14.581	0.111		0.261		0.022
14.589	0.11		0.264		0.022
14.598	0.109		0.268		0.022
14.606	0.109		0.271		0.022
14.614	0.108		0.275		0.022
14.623	0.107		0.279		0.022
14.631	0.106		0.282		0.022
14.64	0.106		0.286		0.022
14.648	0.105		0.291		0.022
14.657	0.104		0.295		0.022
14.665	0.104		0.299		0.022
14.673	0.103		0.304		0.022
14.682	0.102		0.308		0.022
14.69	0.102		0.313		0.022
14.699	0.101		0.318		0.022
14.707	0.101		0.323		0.022
14.715	0.1		0.328		0.022
14.724	0.1		0.333		0.022
14.732	0.099		0.339		0.021
14.741	0.099		0.345		0.021
14.749	0.098		0.35		0.021
14.758	0.098		0.356		0.021
14.766	0.097		0.362		0.021
14.774	0.097		0.369		0.021
14.783	0.096		0.375		0.021
14.791	0.096		0.382		0.021
14.8	0.096		0.389		0.021
14.808	0.095		0.396		0.021
14.816	0.095		0.403		0.021
14.825	0.094		0.41		0.021
14.833	0.094		0.418		0.021
14.842	0.094		0.425		0.021
14.85	0.093		0.433		0.021
14.859	0.093		0.441		0.021
14.867	0.092		0.449		0.021
14.875	0.092		0.458		0.021
14.884	0.092		0.466		0.021
14.892	0.091		0.475		0.021
14.901	0.091		0.484		0.021
14.909	0.091		0.493		0.021
14.917	0.09		0.502		0.021
14.926	0.09		0.512		0.021
14.934	0.09		0.521		0.021
14.943	0.089		0.531		0.021
14.951	0.089		0.541		0.021
14.96	0.089		0.551		0.021
14.968	0.088		0.561		0.021
14.976	0.088		0.571		0.021
14.985	0.087		0.582		0.021
14.993	0.087		0.592		0.021
15.002	0.087		0.603		0.021
15.01	0.086		0.613		0.021
15.018	0.086		0.624		0.021
15.027	0.085		0.635		0.021
15.035	0.085		0.646		0.021
15.044	0.084		0.657		0.021
15.052	0.084		0.668		0.021
15.061	0.084		0.679		0.021
15.069	0.083		0.69		0.021
15.077	0.083		0.701		0.021
15.086	0.082		0.712		0.021
15.094	0.082		0.723		0.021
15.103	0.081		0.733		0.021
15.111	0.08		0.744		0.021
15.119	0.08		0.755		0.021
15.128	0.079		0.766		0.021
15.136	0.079		0.776		0.021
15.145	0.078		0.787		0.021
15.153	0.078		0.797		0.021
15.162	0.077		0.807		0.021
15.17	0.076		0.817		0.021
15.178	0.076		0.827		0.021
15.187	0.075		0.837		0.021
15.195	0.075		0.846		0.021
15.204	0.074		0.856		0.021
15.212	0.073		0.865		0.021
15.22	0.073		0.874		0.021
15.229	0.072		0.882		0.021
15.237	0.071		0.891		0.021
15.246	0.071		0.899		0.021
15.254	0.07		0.907		0.021
15.263	0.069		0.914	33304.1	0.021
15.271	0.069		0.921	33326.9	0.021
15.279	0.068		0.928	33323.7	0.021
15.288	0.067		0.935	33278.4	0.021
15.296	0.067		0.941	33207.4	0.021
15.305	0.066		0.948	33105.6	0.021
15.313	0.065		0.953	32980.7	0.02
15.321	0.064		0.959	32828.7	0.02
15.33	0.064		0.964	32710.7	0.02
15.338	0.063		0.969	32598.5	0.02
15.347	0.062		0.973	32492.1	0.02
15.355	0.062		0.977	32444.8	0.02
15.364	0.061		0.981	32413.8	0.02
15.372	0.06		0.984	32334.2	0.02
15.38	0.06		0.987	32228.3	0.019
15.389	0.059		0.99	32146.6	0.019
15.397	0.058		0.993	32120.1	0.019
15.406	0.058		0.995	32139.2	0.019
15.414	0.057		0.996	32163.6	0.019
15.423	0.056		0.998	32179.8	0.018
15.431	0.056		0.999	32182.7	0.018
15.439	0.055		1	32161.4	0.018
15.448	0.054		1	32089.1	0.018
15.456	0.054		1	31940.6	0.018
15.465	0.053		1	31833.8	0.017
15.473	0.052		0.999	31758.4	0.017
15.481	0.052		0.998	31697.7	0.017
15.49	0.051		0.997	31595.5	0.017
15.498	0.051		0.996	31492.5	0.017
15.507	0.05		0.994	31410.7	0.016
15.515	0.049		0.992	31341.2	0.016
15.524	0.049		0.99	31251.5	0.016
15.532	0.048		0.987	31124.8	0.016
15.54	0.047		0.984	30955.9	0.015
15.549	0.047		0.981	30847.3	0.015
15.557	0.046		0.978	30785.6	0.015
15.566	0.046		0.974	30745.5	0.015
15.574	0.045		0.97	30696.3	0.014
15.582	0.045		0.966	30628.2	0.014
15.591	0.044		0.962	30597.4	0.014
15.599	0.043		0.957	30598.9	0.014
15.608	0.043		0.952	30638.5	0.013
15.616	0.042		0.948	30627.4	0.013
15.625	0.042		0.942	30532	0.013
15.633	0.041		0.937	30445.9	0.013
15.641	0.041		0.932	30373.5	0.012
15.65	0.04		0.926	30230.8	0.012
15.658	0.04		0.92		0.012
15.667	0.039		0.914		0.012
15.675	0.039		0.908		0.012
15.683	0.038		0.902		0.011
15.692	0.038		0.895		0.011
15.7	0.037		0.889		0.011
15.709	0.037		0.882		0.011
15.717	0.036		0.875		0.011
15.726	0.036		0.868		0.01
15.734	0.035		0.861		0.01
15.742	0.035		0.854		0.01
15.751	0.034		0.847		0.01
15.759	0.034		0.84		0.009
15.768	0.033		0.833		0.009
15.776	0.033		0.825		0.009
15.784	0.033		0.818		0.009
15.793	0.032		0.81		0.009
15.801	0.032		0.803		0.008
15.81	0.031		0.795		0.008
15.818	0.031		0.787		0.008
15.827	0.03		0.78		0.008
15.835	0.03		0.772		0.008
15.843	0.03		0.764		0.008
15.852	0.029		0.756		0.007
15.86	0.029		0.749		0.007
15.869	0.028		0.741		0.007
15.877	0.028		0.733		0.007
15.885	0.028		0.725		0.007
15.894	0.027		0.717		0.007
15.902	0.027		0.709		0.007
15.911	0.026		0.701		0.007
15.919	0.026		0.693		0.007
15.928	0.026		0.686		0.006
15.936	0.025		0.678		0.006
15.944	0.025		0.67		0.006
15.953	0.025		0.662		0.006
15.961	0.024		0.654		0.006
15.97	0.024		0.646		0.006
15.978	0.023		0.639		0.006
15.986	0.023		0.631		0.006
15.995	0.023		0.623		0.006
16.003	0.022		0.615		0.005
16.012	0.022		0.607		0.005
16.02	0.022		0.6		0.005
16.029	0.021		0.592		0.005
16.037	0.021		0.584		0.005
16.045	0.021		0.577		0.005
16.054	0.02		0.569		0.005
16.062	0.02		0.562		0.004
16.071	0.02		0.554		0.004
16.079	0.019		0.547		0.004
16.087	0.019		0.539		0.004
16.096	0.019		0.532		0.004
16.104	0.018		0.525		0.004
16.113	0.018		0.517		0.004
16.121	0.018		0.51		0.004
16.13	0.017		0.503		0.004
16.138	0.017		0.496		0.004
16.146	0.017		0.489		0.004
16.155	0.017		0.482		0.003
16.163	0.016		0.475		0.003
16.172	0.016		0.468		0.003
16.18	0.016		0.461		0.003
16.188	0.016		0.454		0.003
16.197	0.015		0.447		0.003
16.205	0.015		0.441		0.003
16.214	0.015		0.434		0.003
16.222	0.015		0.427		0.003
16.231	0.014		0.421		0.003
16.239	0.014		0.414		0.003
16.247	0.014		0.408		0.003
16.256	0.014		0.401		0.003
16.264	0.013		0.395		0.003
16.273	0.013		0.389		0.003
16.281	0.013		0.383		0.003
16.289	0.013		0.377		0.003
16.298	0.013		0.371		0.003
16.306	0.012		0.365		0.003
16.315	0.012		0.359		0.003
16.323	0.012		0.353		0.003
16.332	0.012		0.347		0.003
16.34	0.012		0.342		0.003
16.348	0.011		0.336		0.003
16.357	0.011		0.33		0.003
16.365	0.011		0.325		0.003
16.374	0.011		0.319		0.003
16.382	0.011		0.314		0.003
16.39	0.01		0.309		0.003
16.399	0.01		0.304		0.003
16.407	0.01		0.298		0.003
16.416	0.01		0.293		0.003
16.424	0.01		0.288		0.003
16.433	0.009		0.283		0.003
16.441	0.009		0.278		0.003
16.449	0.009		0.274		0.003
16.458	0.009		0.269		0.003
16.466	0.009		0.264		0.003
16.475	0.009		0.26		0.003
16.483	0.008		0.255		0.003
16.491	0.008		0.251		0.003
16.5	0.008		0.246		0.003
16.508	0.008		0.242		0.003
16.517	0.008		0.238		0.003
16.525	0.008		0.234		0.003
16.534	0.008		0.23		0.003
16.542	0.008		0.225		0.003
16.55	0.007		0.222		0.003
16.559	0.007		0.218		0.003
16.567	0.007		0.214		0.003
16.576	0.007		0.21		0.003
16.584	0.007		0.206		0.003
16.593	0.007		0.203		0.003
16.601	0.007		0.199		0.003
16.609	0.007		0.196		0.003
16.618	0.007		0.192		0.003
16.626	0.007		0.189		0.003
16.635	0.006		0.185		0.003
16.643	0.006		0.182		0.003
16.651	0.006		0.179		0.003
16.66	0.006		0.176		0.002
16.668	0.006		0.173		0.002
16.677	0.006		0.17		0.002
16.685	0.006		0.167		0.002
16.694	0.005		0.164		0.002
16.702	0.005		0.161		0.002
16.71	0.005		0.158		0.002
16.719	0.005		0.155		0.002
16.727	0.005		0.152		0.002
16.736	0.005		0.15		0.002
16.744	0.005		0.147		0.002
16.752	0.005		0.144		0.002
16.761	0.005		0.142		0.002
16.769	0.004		0.139		0.002
16.778	0.004		0.137		0.002
16.786	0.004		0.135		0.002
16.795	0.004		0.132		0.002
16.803	0.004		0.13		0.002
16.811	0.004		0.128		0.001
16.82	0.004		0.125		0.001
[truncated: 851 more rows]

## Sheet: table
	monomer (kDa)	oligomer (kDa)	multiple	oligomer
WT	17.4	96.4	x5.5	hexamer
IDR all	17.3	96.1	x5.6	hexamer
CTD all	17.4	31.8	x1.8	dimer
