# Supplementary material for: Dissecting the phase separation and oligomerization activities of the carboxysome positioning protein McdB
Source: eLife. 2023 Sep 5;12:e81362. doi: 10.7554/eLife.81362 (PMC10554743; doi:10.7554/eLife.81362)
Supplement: Figure 5—source data 6. [file elife-81362-fig5-data6.xlsx]

## Sheet: raw
	Q muts - 50 uM
1			raw	sub.bak
	P1	1	50191.9	35340.9			p	s	sum	pr	sr
	S1	2	55716.6	40865.6		wt	35340.9	40865.6	76206.4	0.463752	0.536248	1
	P2	3	36745.5	21796.7		q31	21796.7	42223.8	64020.6	0.340465	0.659535	1
	S2	4	57172.5	42223.8		q32	21419.4	41314.7	62734.1	0.341432	0.658568	1
	P3	5	36436.9	21419.4		qa	10617.3	38690	49307.3	0.21533	0.78467	1
	S3	6	56332.2	41314.7
	P4	7	26240.9	10617.3
	S4	8	54313.5	38690
	B1	15	14851
	B2	16	14948.7
	B3	17	15017.5
	B4	18	15623.5
2			raw	sub.bak
	P1	1	45612.3	25035.5			p	s	sum	pr	sr
	S1	2	53603.4	33026.6		wt	25035.5	33026.6	58062.1	0.431185	0.568815	1
	P2	3	33013.2	13175.4		q31	13175.4	34323.8	47499.2	0.277381	0.722619	1
	S2	4	54161.6	34323.8		q32	10956.7	33419.5	44376.1	0.246905	0.753095	1
	P3	5	30982.1	10956.7		qa	4640.12	32977.8	37617.9	0.123349	0.876651	1
	S3	6	53444.9	33419.5
	P4	7	24223.9	4640.12
	S4	8	52561.6	32977.8
	B1	15	20576.8
	B2	16	19837.8
	B3	17	20025.5
	B4	18	19583.8
3			raw	sub.bak
	P1	1	163.422	115.616			p	s	sum	pr	sr
	S1	2	98.831	51.025		wt	115.616	51.025	166.641	0.693803	0.306197	1
	P2	3	47.815	6.096		q31	6.096	114.563	120.659	0.0505225	0.949477	1
	S2	4	156.282	114.563		q32	5.152	119.964	125.116	0.0411778	0.958822	1
	P3	5	41.052	5.152		qa	11.387	121.631	133.018	0.085605	0.914395	1
	S3	6	155.864	119.964
	P4	7	46.161	11.387
	S4	8	156.405	121.631
	B1	15	47.806
	B2	16	41.719
	B3	17	35.9
	B4	18	34.774

## Sheet: to graph
	P			S
	1	2	3	1	2	3
WT	0.463752	0.431185	0.693803	0.536248	0.568815	0.306197
3Q1	0.340465	0.277381	0.050523	0.659535	0.722619	0.949477
3Q2	0.341432	0.246905	0.041178	0.658568	0.753095	0.958822
QA	0.21533	0.123349	0.085605	0.78467	0.876651	0.914395
