# Supplementary material for: Dissecting the phase separation and oligomerization activities of the carboxysome positioning protein McdB
Source: eLife. 2023 Sep 5;12:e81362. doi: 10.7554/eLife.81362 (PMC10554743; doi:10.7554/eLife.81362)
Supplement: Figure 6—source data 2. [file elife-81362-fig6-data2.xlsx]

## Sheet: raw
	Q muts - 100 uM - 10peg
1			raw	sub.bak
	P1	1	204.329	106.565			p	s	sum	pr	sr
	S1	2	110.545	12.781		wt	106.565	12.781	119.346	0.892908	0.107092	1
	P2	3	205.094	116.139		q21	116.139	20.374	136.513	0.850754	0.149246	1
	S2	4	109.329	20.374		q22	107.412	42.279	149.691	0.717558	0.282442	1
	P3	5	191.902	107.412		q23	101.108	46.321	147.429	0.685808	0.314192	1
	S3	6	126.769	42.279		q31	31.294	105.522	136.816	0.228731	0.771269	1
	P4	7	181.038	101.108		q32	70.463	82.227	152.69	0.461478	0.538522	1
	S4	8	126.251	46.321		qa	6.607	80.827	87.434	0.0755656	0.924434	1
	P5	9	110.121	31.294
	S5	10	184.349	105.522
	P6	11	149.509	70.463
	S6	12	161.273	82.227
	P7	13	87.415	6.607
	S7	14	161.635	80.827
	B1	15	97.764
	B2	16	88.955
	B3	17	84.49
	B4	18	79.93
	B5	19	78.827
	B6	20	79.046
	B7	21	80.808
2			raw	sub.bak
	P1	1	60371.6	43666.2			p	s	sum	pr	sr
	S1	2	19657.4	2951.95		wt	43666.2	2951.95	46618.1	0.936678	0.063322	1
	P2	3	54029.6	36935.9		q21	36935.9	11793.3	48729.2	0.757984	0.242016	1
	S2	4	28887	11793.3		q22	32298.5	8623.36	40921.8	0.789273	0.210727	1
	P3	5	49666.6	32298.5		q23	36968.6	10179.8	47148.4	0.78409	0.21591	1
	S3	6	25991.5	8623.36		q31	30287	19020.8	49307.8	0.614244	0.385756	1
	P4	7	53611	36968.6		q32	28995	20954.7	49949.7	0.580483	0.419517	1
	S4	8	26822.3	10179.8		qa	8858.37	36905.1	45763.5	0.193569	0.806431	1
	P5	9	47836.4	30287
	S5	10	36570.2	19020.8
	P6	11	45045.3	28995
	S6	12	37005.1	20954.7
	P7	13	24526.1	8858.37
	S7	14	52572.8	36905.1
	B1	15	16705.4
	B2	16	17093.7
	B3	17	17368.2
	B4	18	16642.4
	B5	19	17549.4
	B6	20	16050.4
	B7	21	15667.7
3			raw	sub.bak
	P1	1	50434.9	34352.4			p	s	sum	pr	sr
	S1	2	18282.3	2199.77		wt	34352.4	2199.77	36552.2	0.939818	0.0601817	1
	P2	3	44652.9	28720.4		q21	28720.4	8652.93	37373.3	0.768473	0.231527	1
	S2	4	24585.5	8652.93		q22	27142	6021.69	33163.7	0.818425	0.181575	1
	P3	5	42933.9	27142		q23	30594.3	8032.63	38627	0.792046	0.207954	1
	S3	6	21813.6	6021.69		q31	22184.4	15280.2	37464.6	0.592143	0.407857	1
	P4	7	46644	30594.3		q32	22022.5	16437.6	38460.1	0.572607	0.427393	1
	S4	8	24082.3	8032.63		qa	7335.59	34083.4	41418.9	0.177107	0.822893	1
	P5	9	38367.3	22184.4
	S5	10	31463.1	15280.2
	P6	11	38676	22022.5
	S6	12	33091.1	16437.6
	P7	13	22903.9	7335.59
	S7	14	49651.7	34083.4
	B1	15	16082.5
	B2	16	15932.5
	B3	17	15791.9
	B4	18	16049.7
	B5	19	16182.9
	B6	20	16653.6
	B7	21	15568.3

## Sheet: to graph
	P			S
	1	2	3	1	2	3
WT	0.892908	0.936678	0.939818	0.107092	0.063322	0.060182
2Q1	0.850754	0.757984	0.768473	0.149246	0.242016	0.231527
2Q2	0.717558	0.789273	0.818425	0.282442	0.210727	0.181575
2Q3	0.685808	0.78409	0.792046	0.314192	0.21591	0.207954
3Q1	0.228731	0.614244	0.592143	0.771269	0.385756	0.407857
3Q2	0.461478	0.580483	0.572607	0.538522	0.419517	0.427393
QA	0.075566	0.193569	0.177107	0.924434	0.806431	0.822893
