# Supplementary material for: Dissecting the phase separation and oligomerization activities of the carboxysome positioning protein McdB
Source: eLife. 2023 Sep 5;12:e81362. doi: 10.7554/eLife.81362 (PMC10554743; doi:10.7554/eLife.81362)
Supplement: Figure 7—source data 2. [file elife-81362-fig7-data2.xlsx]

## Sheet: Sheet1
	mcherry			mCh-McdB[wt]			mCh-McdB[-3]
time (h)	1	2	3	1	2	3	1	2	3
0	0.002	0	0	0.006	0.007	0.003	0.006	0	0
1	0	0	0.002	0.07	0.081	0.064	0.005	0.008	0.003
2	0	0	0	0.463	0.333	0.321	0.029	0.034	0.029
3	0	0.002	0	0.678	0.623	0.666	0.099	0.077	0.101
