# Supplementary material for: Dissecting the phase separation and oligomerization activities of the carboxysome positioning protein McdB
Source: eLife. 2023 Sep 5;12:e81362. doi: 10.7554/eLife.81362 (PMC10554743; doi:10.7554/eLife.81362)
Supplement: Figure 7—source data 3. [file elife-81362-fig7-data3.xlsx]

## Sheet: Sheet1
	mcherry			mCh-McdB[wt]			mCh-McdB[-3]
time (h)	1	2	3	1	2	3	1	2	3
0	0	0	0	0	0	0	0	0	0
1	0.352176	0.43193	0.480872	0.249481	0.115492	0.530228	0.308166	0.446915	0.46948
2	0.773695	0.792014	0.897881	0.620776	0.522506	0.779784	0.596683	0.496256	0.540814
3	1	1	1	0.816247	0.587468	0.958441	0.842478	0.652685	0.617123
