# Supplementary material for: Dissecting the phase separation and oligomerization activities of the carboxysome positioning protein McdB
Source: eLife journal article supplement (doi:10.7554/elife.81362), 2023-09-05
Supplement: supp [file elife-81362-supp-v1.zip]

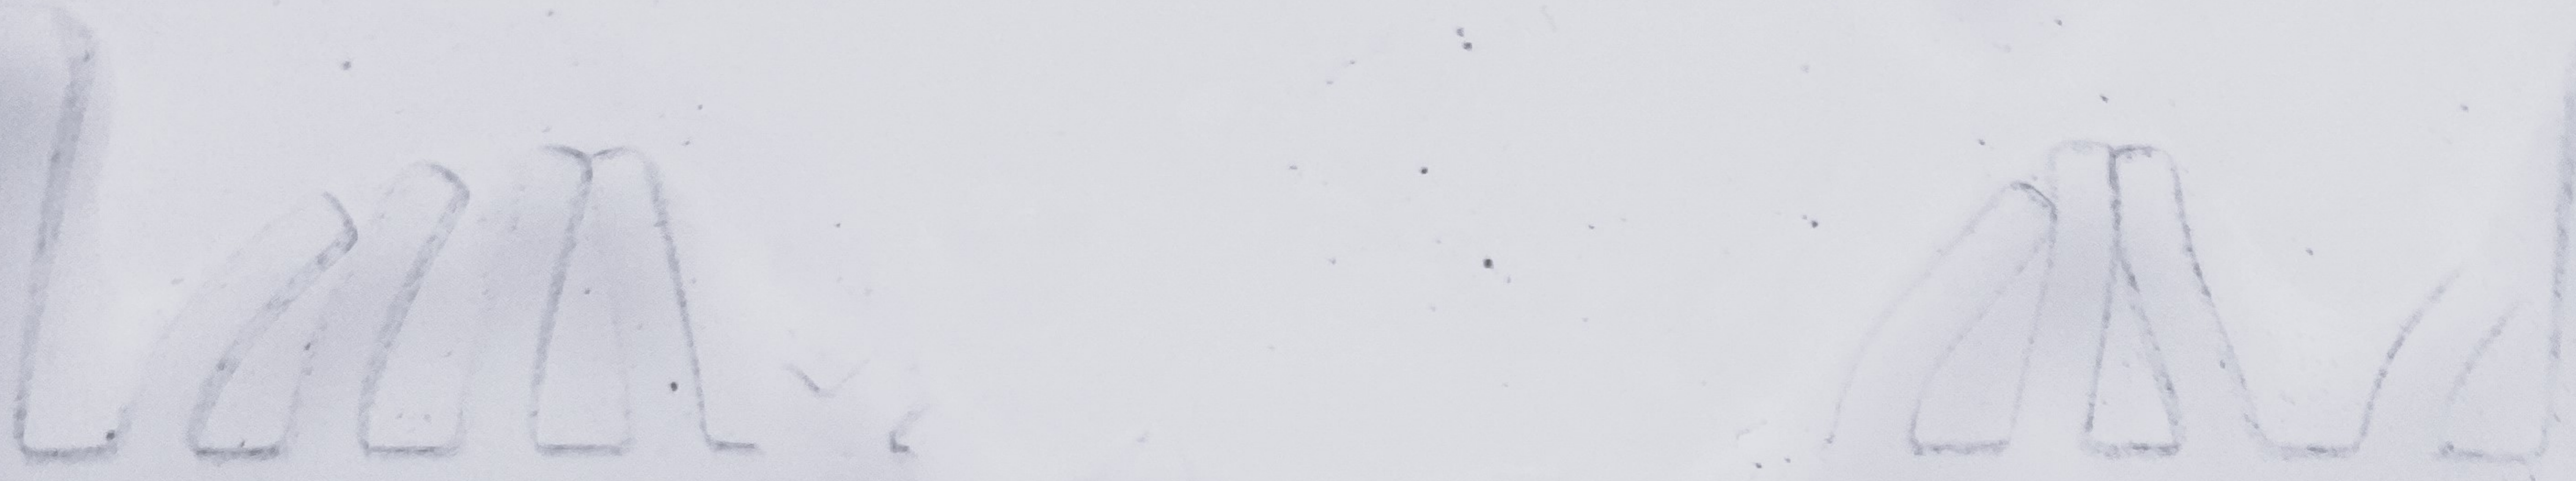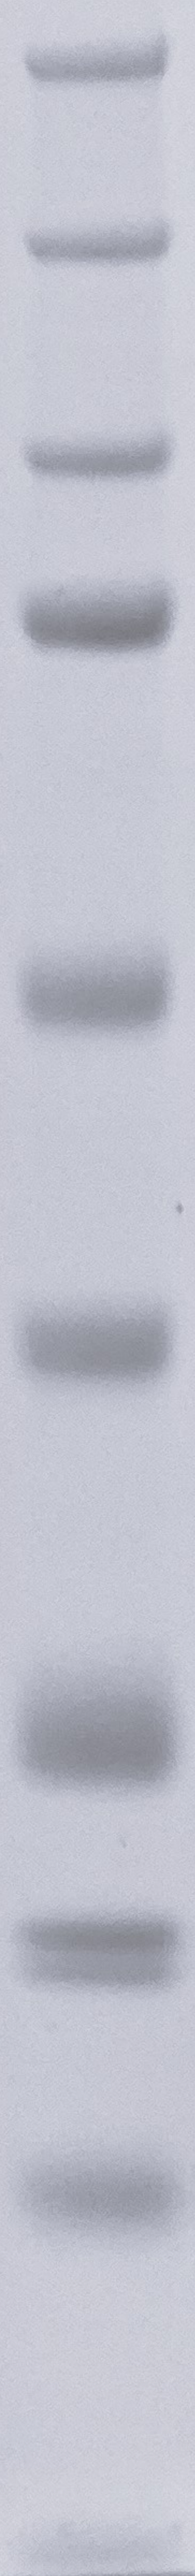

pellet supernatant pellet supernatant pellet supernatant pellet supernatant pellet supernatant

50 100 250 500 750 1000

full-length  
McdB

mM KCl
