# Supplementary material for: Dissecting the phase separation and oligomerization activities of the carboxysome positioning protein McdB
Source: eLife journal article supplement (doi:10.7554/elife.81362), 2023-09-05
Supplement: supp [file elife-81362-supp-v1.zip]

60

**Seq.** MTDAFDRLKKRSRTPIAREGSLTTGPELSDRPLQLLPREFETFCDRYAVHAGDVIEAALDLVLLDPDLQQRLLQRL  
**Pred.** CCC**HHHHHHH**CCCCCCCCCCCCCCCCCCCC**HHHHHHHHHHHHHHHHHHHHHHHHHHHHHHHHHHHHHHHHHHHHHH**CC**HHHHHHHHHHHH**  
**Conf.** 9607788886248862014776768565767166623889988898876101499997667610877999999999

```

      80               100               120               140
      |               |               |               |
Seq.  RQNGSDRVWLGTACPRSWQQQLQQQAQDQGLSEADLLQEAlAQRLDLVLGQTTLREEVTLLRQELDQLKRKLHW
Pred. HHCCCCCSSSCCCCHHHHHHHHHHHHHHCCCCHHHHHHHHHHHHHHHHHHHHHHHHHHHHHHHHHHHHHHHHHHHHCCC
Conf. 707897633344759668999999999876865888999999999889871137999999999999999874289
      H:Helix; S:Strand; C:Coil

```

**B**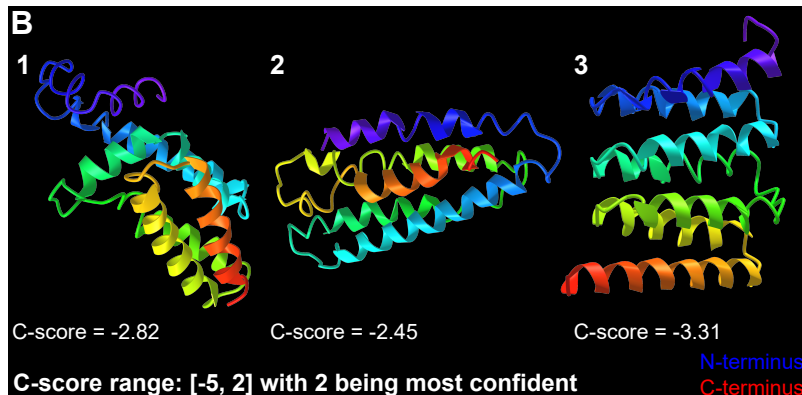

**C**

| Rank            | PDB Hit | ID 1 | ID 2 | Z-score |
|-----------------|---------|------|------|---------|
| 1               | 4mh6A   | 0.14 | 0.20 | 0.74    |
| 2               | 4wheA   | 0.21 | 0.21 | 0.91    |
| 3               | 7mrwB   | 0.10 | 0.16 | 0.58    |
| 4               | 1aepA   | 0.18 | 0.22 | 0.61    |
| 5               | 5n9j    | 0.46 | 0.12 | 0.74    |
| 6               | 2eh3A   | 0.13 | 0.19 | 0.43    |
| 7               | 5cwjA   | 0.08 | 0.19 | 0.85    |
| 8               | 2wvf    | 0.11 | 0.18 | 1.71    |
| 9               | 6h9lA   | 0.15 | 0.18 | 0.69    |
| 10              | 2pffA   | 0.18 | 0.28 | 0.78    |
| <b>Average:</b> |         | 0.17 | 0.19 | 0.80    |
