# Supplementary material for: Dissecting the phase separation and oligomerization activities of the carboxysome positioning protein McdB
Source: eLife journal article supplement (doi:10.7554/elife.81362), 2023-09-05
Supplement: supp [file elife-81362-supp-v1.zip]

----- full-length McdB

----- His-SUMO tag

----- IDR+CC

----- CC+CTD

----- CC

----- IDR

----- CTD
