# Supplementary material for: Dissecting the phase separation and oligomerization activities of the carboxysome positioning protein McdB
Source: eLife journal article supplement (doi:10.7554/elife.81362), 2023-09-05

**A**

| IDR Net   |        | IDR Sequence         | Model                                                                             |
|-----------|--------|----------------------|-----------------------------------------------------------------------------------|
| Name      | Charge |                      |                                                                                   |
| wt        | +3     | MTDAFDRLKKRSRTPIAREG | 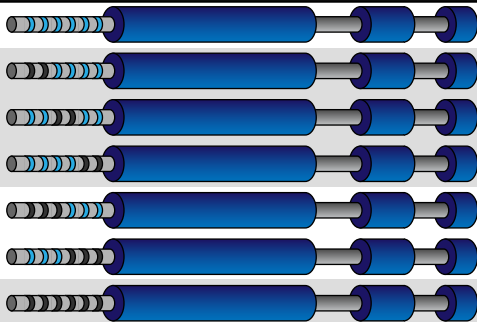 |
| 2Q left   | +1     | MTDAFDQLQKRSRTPIAREG |                                                                                   |
| 2Q middle | +1     | MTDAFDRLKQQSRTPIAREG |                                                                                   |
| 2Q right  | +1     | MTDAFDRLKKRSQTPIAQEG |                                                                                   |
| 3Q left   | 0      | MTDAFDQLQQRSRTPIAREG |                                                                                   |
| 3Q right  | 0      | MTDAFDRLKKQSQTPIAQEG |                                                                                   |
| all       | -3     | MTDAFDQLQQQSQTPIAQEG |                                                                                   |

**B**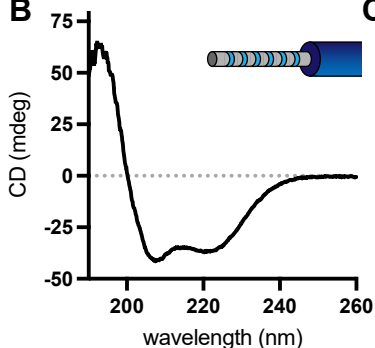**C**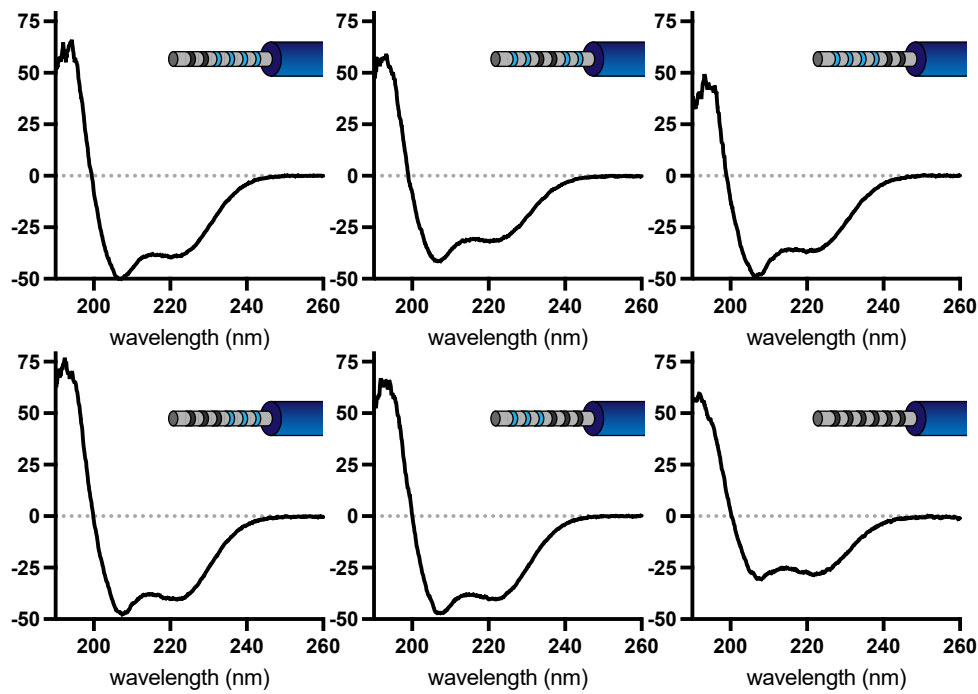

Supplement: supp [file elife-81362-supp-v1.zip]
