# Supplementary material for: Dissecting the phase separation and oligomerization activities of the carboxysome positioning protein McdB
Source: eLife journal article supplement (doi:10.7554/elife.81362), 2023-09-05
Supplement: supp [file elife-81362-supp-v1.zip]

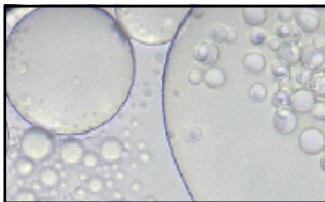

pH 4.2,  
Sodium phosphate-  
monobasic 0.1 M,  
Sodium citrate 0.1 M,  
PEG 20000 12.0 w/v

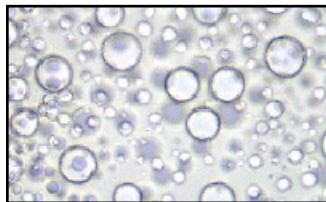

pH 7,  
PEG 20000 24.0 w/v,  
Tacsimate 10.0 v/v

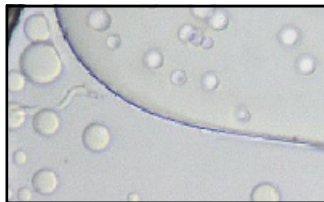

pH 6,  
Sodium phosphate-  
monobasic 0.1 M,  
MES 0.1 M,  
PEG 20000 12.0 w/v

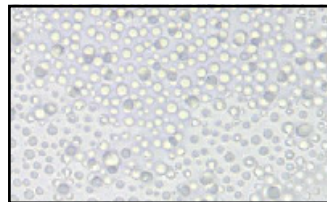

pH 8.5,  
Ammonium sulfate 1.0 M,  
Tris-HCl 0.1 M,

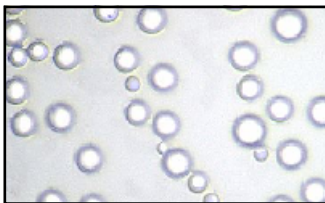

pH 9,  
Potassium phosphate  
tribasic 0.1 M,  
TAPS 0.1 M,  
PEG 4000 20.0 w/v

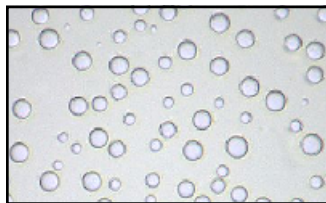

pH 10,  
Magnesium sulfate  
heptahydrate 0.1 M,  
CAPS 0.1 M,  
PEG 8000 20.0 w/v

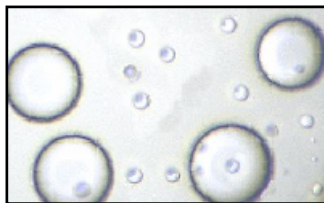

pH 6.5,  
Ammonium sulfate 0.2 M,  
Sodium cacodylate  
trihydrate 0.1 M,  
PEG 8000 30.0 w/v

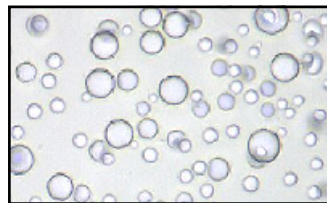

pH 7,  
PEG 3350 30.0 w/v,  
Tacsimate 10.0 v/v

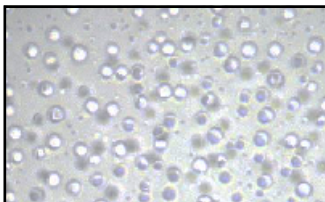

pH 6,  
Manganese sulfate  
monohydrate 0.1 M,  
MES 0.1 M,  
PEG 8000 40.0 w/v

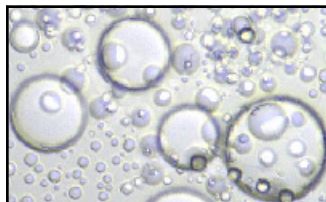

pH 5,  
Sodium phosphate-  
monobasic 0.1 M,  
Sodium acetate 0.1 M,  
PEG 20000 24.0 w/v

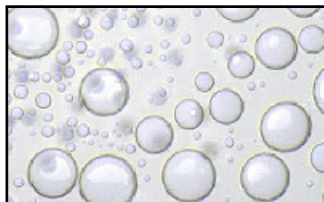

pH 10,  
Sodium phosphate-  
monobasic 0.1 M,  
CAPS 0.1 M,  
PEG 20000 24.0 w/v

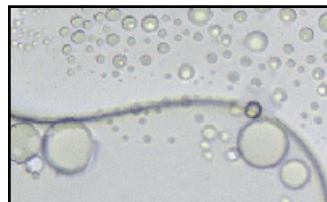

pH 7,  
Polypropylene glycol  
P 400 20.0 v/v,  
Tacsimate 10.0 v/v
