# Supplementary material for: Dissecting the phase separation and oligomerization activities of the carboxysome positioning protein McdB
Source: eLife journal article supplement (doi:10.7554/elife.81362), 2023-09-05

**A**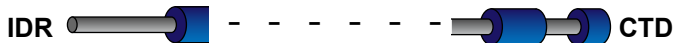

**wt:** MTDAF**D**RL**K**KRS**R**TPIA**R**EG---**R**EEVTLL**R**QE**L**DQL**K**RKLHGW

**IDR all:** MTDAF**D**AL**AA**S**A**TPIA**A**EG---**R**EEVTLL**R**QE**L**DQL**K**RKLHGW

**IDR left:** MTDAF**D**AL**AA****R**S**R**TPIA**R**EG---**R**EEVTLL**R**QE**L**DQL**K**RKLHGW

**IDR right:** MTDAF**D**RL**K**K**A**S**A**TPIA**A**EG---**R**EEVTLL**R**QE**L**DQL**K**RKLHGW

**CTD all:** MTDAF**D**RL**K**KRS**R**TPIA**R**EG---**A**EEVTLL**A**QE**L**DQL**AA**ALHGW

**CTD left:** MTDAF**D**RL**K**KRS**R**TPIA**R**EG---**A**EEVTLL**A**QE**L**DQL**K**RKLHGW

**CTD right:** MTDAF**D**RL**K**KRS**R**TPIA**R**EG---**R**EEVTLL**R**QE**L**DQL**AA**ALHGW

**B**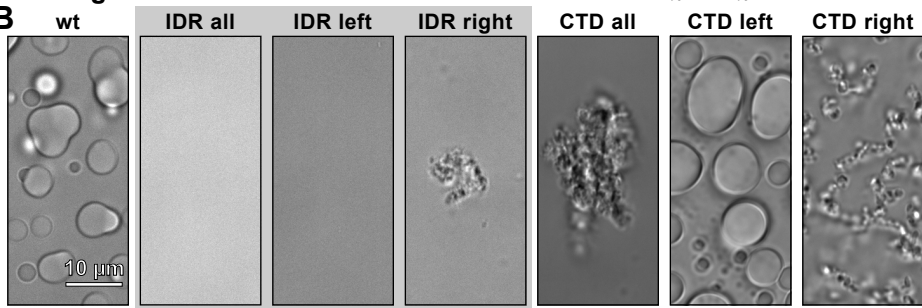

Supplement: supp [file elife-81362-supp-v1.zip]
