# Supplementary material for: Dissecting the phase separation and oligomerization activities of the carboxysome positioning protein McdB
Source: eLife journal article supplement (doi:10.7554/elife.81362), 2023-09-05
Supplement: supp [file elife-81362-supp-v1.zip]

**A**

|  | Domain       |            |                       |                                                                                   |
|--|--------------|------------|-----------------------|-----------------------------------------------------------------------------------|
|  | Name         | Net Charge | Domain Sequence       | Domain Model                                                                      |
|  | CTD wt       | 0          | EEVTLLRQELDQLKRKLHW   |  |
|  | CTD 2Q left  | +2         | QQVTLLRQELDQLKRKLHW   |  |
|  | CTD 2Q right | +2         | EEVTLLRQQQLQQQLKRKLHW |  |
|  | CTD all      | +4         | QQVTLLRQQQLQQQLKRKLHW |  |

**B**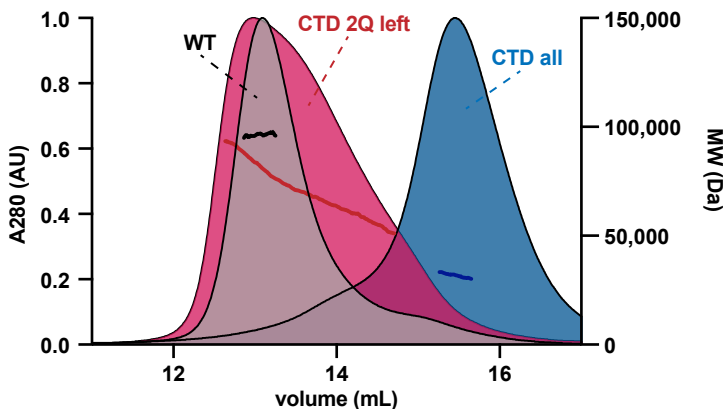

|             | monomer |       | oligomer |          |
|-------------|---------|-------|----------|----------|
|             | (kDa)   | (kDa) | multiple | oligomer |
| WT          | 17.4    | 96.4  | x5.5     | hexamer  |
| CTD 2Q left | 17.4    | 77.8  | x4.5     | mixed    |
| CTD all     | 17.4    | 31.8  | x1.8     | dimer    |
