# Supplementary material for: Dissecting the phase separation and oligomerization activities of the carboxysome positioning protein McdB
Source: eLife journal article supplement (doi:10.7554/elife.81362), 2023-09-05
Supplement: supp [file elife-81362-supp-v1.zip]

--- full-length McdB pellet

--- IDR+CC pellet

--- IDR+CC supernatant

--- CC pellet

--- CC supernatant

--- CC+CTD pellet

--- CC+CTD supernatant

--- CTD supernatant

--- IDR supernatant
