# Supplementary material for: Dissecting the phase separation and oligomerization activities of the carboxysome positioning protein McdB
Source: eLife journal article supplement (doi:10.7554/elife.81362), 2023-09-05
Supplement: supp [file Figure 1-figure supplement 2-source data 1.xlsx]

## Sheet: Sheet1
Rank	PDB Hit	ID 1	ID 2	Z-score
1	4mh6A	0.14	0.2	0.74
2	4wheA	0.21	0.21	0.91
3	7mrwB	0.1	0.16	0.58
4	1aepA	0.18	0.22	0.61
5	5n9j	0.46	0.12	0.74
6	2eh3A	0.13	0.19	0.43
7	5cwjA	0.08	0.19	0.85
8	2wvf	0.11	0.18	1.71
9	6h9lA	0.15	0.18	0.69
10	2pffA	0.18	0.28	0.78
	average	0.17	0.19	0.8
