# Supplementary material for: Dissecting the phase separation and oligomerization activities of the carboxysome positioning protein McdB
Source: eLife journal article supplement (doi:10.7554/elife.81362), 2023-09-05
Supplement: supp [file Figure 5-figure supplement 1-source data 1.xlsx]

## Sheet: PhaseDiagrams_AllPlates_RT
Abs1	Abs2	Abs3	average	blanked	stdev	pH	McdB (uM)	KCl (mM)
0.0454	0.0454	0.0456	0.0454667	0	0.00011547	6.3	0	50
0.0437	0.0437	0.0438	0.0437333	0	5.7736e-05	6.7	0	50
0.0445	0.0445	0.0446	0.0445333	0	5.77339e-05	7.2	0	50
0.0456	0.0456	0.0457	0.0456333	0	5.77339e-05	7.7	0	50
0.0439	0.0442	0.044	0.0440333	0	0.000152751	8.2	0	50
0.0464	0.0464	0.0465	0.0464333	0	5.7736e-05	8.6	0	50
0.0466	0.0466	0.0466	0.0466	0	0	6.3	0	100
0.0462	0.0463	0.0464	0.0463	0	9.99998e-05	6.7	0	100
0.0459	0.046	0.0459	0.0459333	0	5.7736e-05	7.2	0	100
0.0457	0.0459	0.0459	0.0458333	0	0.00011547	7.7	0	100
0.0449	0.045	0.0449	0.0449333	0	5.7736e-05	8.2	0	100
0.0464	0.0467	0.0464	0.0465	0	0.000173206	8.6	0	100
0.0448	0.0449	0.0448	0.0448333	-0.000633335	5.7736e-05	6.3	1	50
0.0432	0.0433	0.0434	0.0433	-0.000433332	9.99998e-05	6.7	1	50
0.0465	0.0464	0.0467	0.0465333	0.002	0.000152753	7.2	1	50
0.0512	0.0511	0.0512	0.0511667	0.00553333	5.77339e-05	7.7	1	50
0.0461	0.0458	0.046	0.0459667	0.00193333	0.000152753	8.2	1	50
0.0459	0.0459	0.046	0.0459333	-0.000500001	5.7736e-05	8.6	1	50
0.046	0.046	0.0462	0.0460667	-0.000533332	0.00011547	6.3	1	100
0.0472	0.0472	0.0473	0.0472333	0.000933334	5.77339e-05	6.7	1	100
0.0462	0.0462	0.0463	0.0462333	0.000300001	5.7736e-05	7.2	1	100
0.0557	0.0533	0.0566	0.0552	0.00936667	0.00170587	7.7	1	100
0.0503	0.0504	0.0504	0.0503667	0.00543333	5.7736e-05	8.2	1	100
0.0508	0.0506	0.0507	0.0507	0.0042	9.99998e-05	8.6	1	100
0.1257	0.1258	0.1215	0.124333	0.0788667	0.00245425	6.3	5	50
0.1302	0.1293	0.1297	0.129733	0.086	0.000450925	6.7	5	50
0.1084	0.1072	0.1085	0.108033	0.0635	0.000723419	7.2	5	50
0.0794	0.0796	0.0792	0.0794	0.0337667	0.0002	7.7	5	50
0.08	0.08	0.08	0.08	0.0359667	0	8.2	5	50
0.0615	0.0615	0.0618	0.0616	0.0151667	0.000173204	8.6	5	50
0.1168	0.1164	0.1158	0.116333	0.0697333	0.000503323	6.3	5	100
0.1057	0.1056	0.1054	0.105567	0.0592667	0.000152751	6.7	5	100
0.0452	0.0453	0.0457	0.0454	-0.000533332	0.000264574	7.2	5	100
0.0458	0.0459	0.0463	0.046	0.000166668	0.000264576	7.7	5	100
0.0494	0.0492	0.0494	0.0493333	0.0044	0.000115472	8.2	5	100
0.0497	0.0496	0.05	0.0497667	0.00326667	0.000208167	8.6	5	100
0.0472	0.0471	0.0475	0.0472667	0.0018	0.000208166	6.3	10	50
0.0446	0.0445	0.0448	0.0446333	0.0009	0.000152751	6.7	10	50
0.0469	0.0465	0.0471	0.0468333	0.0023	0.000305505	7.2	10	50
0.0461	0.0458	0.0462	0.0460333	0.000400001	0.000208167	7.7	10	50
0.0461	0.0458	0.0461	0.046	0.00196667	0.000173206	8.2	10	50
0.0448	0.0447	0.0449	0.0448	-0.00163333	9.99998e-05	8.6	10	50
0.0462	0.0462	0.0463	0.0462333	-0.000366665	5.7736e-05	6.3	10	100
0.046	0.0459	0.046	0.0459667	-0.000333334	5.7736e-05	6.7	10	100
0.2063	0.2061	0.2062	0.2062	0.160267	0.000100002	7.2	10	100
0.16	0.1597	0.1597	0.1598	0.113967	0.000173199	7.7	10	100
0.1339	0.1333	0.1356	0.134267	0.0893333	0.00119303	8.2	10	100
0.0505	0.0507	0.0505	0.0505667	0.00406667	0.00011547	8.6	10	100
0.2446	0.244	0.2439	0.244167	0.1987	0.000378592	6.3	25	50
0.2343	0.2345	0.2333	0.234033	0.1903	0.000642912	6.7	25	50
0.2188	0.2156	0.2136	0.216	0.171467	0.00262297	7.2	25	50
0.1737	0.1729	0.1727	0.1731	0.127467	0.000529151	7.7	25	50
0.0506	0.0504	0.0509	0.0506333	0.0066	0.000251662	8.2	25	50
0.0467	0.0465	0.047	0.0467333	0.0003	0.00025166	8.6	25	50
0.2425	0.2401	0.2366	0.239733	0.193133	0.00296705	6.3	25	100
0.3385	0.3382	0.3396	0.338767	0.292467	0.00073711	6.7	25	100
0.1844	0.1826	0.1838	0.1836	0.137667	0.000916514	7.2	25	100
0.1828	0.1821	0.1822	0.182367	0.136533	0.000378592	7.7	25	100
0.134	0.1338	0.1338	0.133867	0.0889333	0.000115472	8.2	25	100
0.0464	0.0462	0.0466	0.0464	-0.0001	0.0002	8.6	25	100
0.7283	0.7382	0.7127	0.7264	0.680933	0.0128557	6.3	50	50
0.5736	0.5644	0.5693	0.5691	0.525367	0.00460325	6.7	50	50
0.5047	0.5144	0.5037	0.5076	0.463067	0.00591016	7.2	50	50
0.4855	0.4796	0.489	0.4847	0.439067	0.00475078	7.7	50	50
0.3753	0.3745	0.3747	0.374833	0.3308	0.000416324	8.2	50	50
0.4139	0.4166	0.4322	0.4209	0.374467	0.00987878	8.6	50	50
0.5956	0.5955	0.5928	0.594633	0.548033	0.00158849	6.3	50	100
0.6342	0.6392	0.634	0.6358	0.5895	0.00294617	6.7	50	100
0.3584	0.3504	0.3555	0.354767	0.308833	0.0040501	7.2	50	100
0.3537	0.3519	0.3507	0.3521	0.306267	0.00150998	7.7	50	100
0.2266	0.2252	0.2241	0.2253	0.180367	0.001253	8.2	50	100
0.1311	0.1304	0.1313	0.130933	0.0844333	0.000472581	8.6	50	100
0.7486	0.5451	0.9019	0.731867	0.6864	0.178988	6.3	100	50
0.6899	0.7116	0.7193	0.706933	0.6632	0.0152454	6.7	100	50
0.8415	0.8874	0.7747	0.834533	0.79	0.0566721	7.2	100	50
0.4403	0.417	0.4174	0.4249	0.379267	0.0133383	7.7	100	50
0.651	0.5725	0.6276	0.617033	0.573	0.0403027	8.2	100	50
0.3981	0.3992	0.3699	0.389067	0.342633	0.0166079	8.6	100	50
0.6344	0.6324	0.6266	0.631133	0.584533	0.00405132	6.3	100	100
0.127	0.1223	0.131	0.126767	0.0804667	0.00435469	6.7	100	100
0.4061	0.448	0.3586	0.404233	0.3583	0.0447292	7.2	100	100
0.3007	0.381	0.3713	0.351	0.305167	0.0438302	7.7	100	100
0.4402	0.4341	0.4172	0.4305	0.385567	0.0119151	8.2	100	100
0.1182	0.1103	0.1072	0.1119	0.0654	0.00567186	8.6	100	100
0.0426	0.0428	0.0427	0.0427	0	0.000100002	6.3	0	250
0.0432	0.0433	0.0434	0.0433	0	9.99998e-05	6.7	0	250
0.0435	0.0439	0.0442	0.0438667	0	0.000351189	7.2	0	250
0.0446	0.0445	0.0446	0.0445667	0	5.77339e-05	7.7	0	250
0.0429	0.0429	0.043	0.0429333	0	5.7736e-05	8.2	0	250
0.0429	0.0428	0.0428	0.0428333	0	5.77339e-05	8.6	0	250
0.043	0.0429	0.043	0.0429667	0	5.7736e-05	6.3	0	500
0.043	0.0432	0.0431	0.0431	0	9.99998e-05	6.7	0	500
0.0429	0.0428	0.043	0.0429	0	9.99998e-05	7.2	0	500
0.0432	0.043	0.043	0.0430667	0	0.00011547	7.7	0	500
0.0429	0.0429	0.0446	0.0434667	0	0.000981495	8.2	0	500
0.044	0.044	0.044	0.044	0	0	8.6	0	500
0.0667	0.0666	0.0699	0.0677333	0.0250333	0.00187705	6.3	1	250
0.0592	0.0603	0.0608	0.0601	0.0168	0.000818536	6.7	1	250
0.0745	0.0742	0.0745	0.0744	0.0305333	0.000173208	7.2	1	250
0.0624	0.0605	0.0602	0.0610333	0.0164667	0.00119304	7.7	1	250
0.0532	0.0531	0.0528	0.0530333	0.0101	0.000208167	8.2	1	250
0.0516	0.0516	0.0514	0.0515333	0.0087	0.000115472	8.6	1	250
0.0581	0.0586	0.0568	0.0578333	0.0148667	0.000929158	6.3	1	500
0.0559	0.0543	0.0541	0.0547667	0.0116667	0.000986577	6.7	1	500
0.0567	0.0568	0.0571	0.0568667	0.0139667	0.000208168	7.2	1	500
0.0524	0.0524	0.0521	0.0523	0.00923333	0.000173206	7.7	1	500
0.0478	0.0478	0.0477	0.0477667	0.0043	5.7736e-05	8.2	1	500
0.0435	0.0435	0.0437	0.0435667	-0.000433334	0.00011547	8.6	1	500
0.0429	0.043	0.0429	0.0429333	0.000233334	5.7736e-05	6.3	5	250
0.0426	0.0427	0.0427	0.0426667	-0.000633334	5.7736e-05	6.7	5	250
0.0447	0.0446	0.0448	0.0447	0.000833333	9.99998e-05	7.2	5	250
0.0433	0.0438	0.0441	0.0437333	-0.000833333	0.000404146	7.7	5	250
0.0431	0.0431	0.0431	0.0431	0.000166666	0	8.2	5	250
0.0437	0.0438	0.0438	0.0437667	0.000933332	5.7736e-05	8.6	5	250
0.0441	0.044	0.0439	0.044	0.00103333	9.99998e-05	6.3	5	500
0.0431	0.0431	0.0431	0.0431	-1.24176e-09	0	6.7	5	500
0.0438	0.0438	0.0439	0.0438333	0.000933333	5.7736e-05	7.2	5	500
0.0443	0.0444	0.0445	0.0444	0.00133333	9.99998e-05	7.7	5	500
0.0428	0.043	0.043	0.0429333	-0.000533331	0.00011547	8.2	5	500
0.0439	0.0441	0.0439	0.0439667	-3.33314e-05	0.00011547	8.6	5	500
0.0968	0.0907	0.0903	0.0926	0.0499	0.0036428	6.3	10	250
0.084	0.0847	0.083	0.0839	0.0406	0.000854404	6.7	10	250
0.0989	0.1004	0.0976	0.0989667	0.0551	0.00140119	7.2	10	250
0.0814	0.0803	0.0818	0.0811667	0.0366	0.000776743	7.7	10	250
0.0592	0.0598	0.0613	0.0601	0.0171667	0.00108166	8.2	10	250
0.0496	0.0495	0.0527	0.0506	0.00776667	0.00181934	8.6	10	250
0.0924	0.0873	0.0858	0.0885	0.0455333	0.00345977	6.3	10	500
0.0836	0.0819	0.0828	0.0827667	0.0396667	0.00085049	6.7	10	500
0.2363	0.2372	0.2341	0.235867	0.192967	0.00159479	7.2	10	500
0.0608	0.0618	0.0607	0.0611	0.0180333	0.000608276	7.7	10	500
0.0461	0.0465	0.0466	0.0464	0.00293333	0.000264574	8.2	10	500
0.0436	0.0435	0.0435	0.0435333	-0.000466667	5.7736e-05	8.6	10	500
0.0887	0.0879	0.0996	0.0920667	0.0493667	0.00653631	6.3	25	250
0.2408	0.1841	0.1776	0.200833	0.157533	0.0347644	6.7	25	250
0.2395	0.2126	0.2016	0.2179	0.174033	0.019498	7.2	25	250
0.1589	0.167	0.1627	0.162867	0.1183	0.00405257	7.7	25	250
0.115	0.12	0.1244	0.1198	0.0768667	0.00470319	8.2	25	250
0.1005	0.0982	0.0992	0.0993	0.0564667	0.00115326	8.6	25	250
0.1346	0.1058	0.1215	0.120633	0.0776667	0.0144195	6.3	25	500
0.1356	0.1264	0.1846	0.148867	0.105767	0.031286	6.7	25	500
0.1005	0.106	0.1039	0.103467	0.0605667	0.00277549	7.2	25	500
0.1053	0.0939	0.0865	0.0952333	0.0521667	0.00947066	7.7	25	500
0.0692	0.0698	0.0704	0.0698	0.0263333	0.000599999	8.2	25	500
0.0803	0.06	0.0904	0.0769	0.0329	0.0154826	8.6	25	500
0.1564	0.1137	0.1737	0.147933	0.105233	0.0308831	6.3	50	250
0.1886	0.197	0.1886	0.1914	0.1481	0.00484974	6.7	50	250
0.1925	0.1575	0.1492	0.1664	0.122533	0.0229811	7.2	50	250
0.1398	0.1412	0.1382	0.139733	0.0951667	0.00150111	7.7	50	250
0.2664	0.2705	0.2696	0.268833	0.2259	0.00215484	8.2	50	250
0.2416	0.2377	0.2387	0.239333	0.1965	0.00202567	8.6	50	250
0.206	0.1409	0.1963	0.181067	0.1381	0.0351218	6.3	50	500
0.2843	0.1447	0.1884	0.2058	0.1627	0.0714081	6.7	50	500
0.2978	0.3314	0.3006	0.309933	0.267033	0.0186433	7.2	50	500
0.0696	0.1189	0.0725	0.087	0.0439333	0.0276642	7.7	50	500
0.1335	0.1179	0.0846	0.112	0.0685333	0.0249782	8.2	50	500
0.2744	0.2737	0.2744	0.274167	0.230167	0.000404143	8.6	50	500
0.9233	0.9334	0.854	0.903567	0.860867	0.043222	6.3	100	250
0.2415	0.3739	0.0876	0.234333	0.191033	0.143284	6.7	100	250
0.2713	0.2283	0.142	0.213867	0.17	0.0658473	7.2	100	250
0.1179	0.223	0.2402	0.1937	0.149133	0.0662057	7.7	100	250
0.266	0.2214	0.1961	0.227833	0.1849	0.0353913	8.2	100	250
0.2808	0.3938	0.282	0.318867	0.276033	0.0648969	8.6	100	250
0.2051	0.1026	0.0996	0.135767	0.0928	0.0600632	6.3	100	500
0.456	0.1874	0.36	0.334467	0.291367	0.136108	6.7	100	500
0.2252	0.1631	0.1945	0.194267	0.151367	0.0310507	7.2	100	500
0.1306	0.1901	0.1792	0.166633	0.123567	0.0316781	7.7	100	500
0.2264	0.0968	0.1085	0.1439	0.100433	0.0716862	8.2	100	500
0.2076	0.1435	0.091	0.147367	0.103367	0.0583961	8.6	100	500
0.0423	0.0424	0.0426	0.0424333	0	0.000152751	6.3	0	750
0.0431	0.0434	0.0435	0.0433333	0	0.000208167	6.7	0	750
0.0421	0.0424	0.0425	0.0423333	0	0.000208166	7.2	0	750
0.0427	0.0428	0.043	0.0428333	0	0.000152753	7.7	0	750
0.0426	0.0426	0.0429	0.0427	0	0.000173206	8.2	0	750
0.0427	0.0427	0.0428	0.0427333	0	5.7736e-05	8.6	0	750
0.0427	0.0428	0.043	0.0428333	0	0.000152753	6.3	0	1000
0.0444	0.0442	0.0447	0.0444333	0	0.000251662	6.7	0	1000
0.0427	0.0428	0.043	0.0428333	0	0.000152753	7.2	0	1000
0.043	0.0434	0.0434	0.0432667	0	0.00023094	7.7	0	1000
0.0427	0.0429	0.0431	0.0429	0	0.0002	8.2	0	1000
0.0644	0.0642	0.0643	0.0643	0	0.000100002	8.6	0	1000
0.0449	0.043	0.0435	0.0438	0.00136667	0.000984885	6.3	1	750
0.0432	0.0433	0.0435	0.0433333	0	0.000152751	6.7	1	750
0.0425	0.0428	0.0429	0.0427333	0.000400001	0.000208167	7.2	1	750
0.0425	0.0427	0.043	0.0427333	-0.0001	0.000251662	7.7	1	750
0.0429	0.0431	0.0432	0.0430667	0.000366668	0.000152753	8.2	1	750
0.0425	0.0426	0.0429	0.0426667	-6.66678e-05	0.000208167	8.6	1	750
0.0425	0.0427	0.0429	0.0427	-0.000133334	0.0002	6.3	1	1000
0.0425	0.0426	0.0429	0.0426667	-0.00176667	0.000208167	6.7	1	1000
0.0425	0.0427	0.0429	0.0427	-0.000133334	0.0002	7.2	1	1000
0.0424	0.0426	0.0428	0.0426	-0.000666668	0.000200002	7.7	1	1000
0.0431	0.0433	0.0437	0.0433667	0.000466666	0.000305505	8.2	1	1000
0.046	0.046	0.0464	0.0461333	-0.0181667	0.00023094	8.6	1	1000
0.06	0.0602	0.0588	0.0596667	0.0172333	0.000757186	6.3	5	750
0.0535	0.0534	0.0554	0.0541	0.0107667	0.00112694	6.7	5	750
0.0485	0.0502	0.0521	0.0502667	0.00793333	0.00180092	7.2	5	750
0.0456	0.0456	0.0457	0.0456333	0.0028	5.77339e-05	7.7	5	750
0.0504	0.0507	0.0515	0.0508667	0.00816667	0.000568624	8.2	5	750
0.0421	0.0422	0.0426	0.0423	-0.000433334	0.000264574	8.6	5	750
0.0421	0.0424	0.0429	0.0424667	-0.000366668	0.000404145	6.3	5	1000
0.0483	0.0483	0.0486	0.0484	0.00396667	0.000173204	6.7	5	1000
0.0424	0.0425	0.0427	0.0425333	-0.000300001	0.000152753	7.2	5	1000
0.0428	0.043	0.0431	0.0429667	-0.0003	0.000152751	7.7	5	1000
0.0436	0.0439	0.0441	0.0438667	0.000966668	0.000251662	8.2	5	1000
0.0424	0.0428	0.043	0.0427333	-0.0215667	0.000305507	8.6	5	1000
0.092	0.0672	0.0602	0.0731333	0.0307	0.0167097	6.3	10	750
0.0741	0.0878	0.0764	0.0794333	0.0361	0.00733644	6.7	10	750
0.073	0.0851	0.0673	0.0751333	0.0328	0.00908974	7.2	10	750
0.0929	0.0677	0.0695	0.0767	0.0338667	0.0140585	7.7	10	750
0.0559	0.0533	0.0524	0.0538667	0.0111667	0.00181751	8.2	10	750
0.0586	0.0581	0.058	0.0582333	0.0155	0.000321456	8.6	10	750
0.0795	0.078	0.0762	0.0779	0.0350667	0.00165227	6.3	10	1000
0.0746	0.0726	0.0744	0.0738667	0.0294333	0.00110152	6.7	10	1000
0.0661	0.0669	0.0667	0.0665667	0.0237333	0.000416332	7.2	10	1000
0.081	0.0891	0.0844	0.0848333	0.0415667	0.00406735	7.7	10	1000
0.0636	0.059	0.0602	0.0609333	0.0180333	0.00238607	8.2	10	1000
0.044	0.0443	0.0444	0.0442333	-0.0200667	0.000208167	8.6	10	1000
0.1706	0.1526	0.1309	0.151367	0.108933	0.0198787	6.3	25	750
0.1093	0.0797	0.0959	0.0949667	0.0516333	0.0148221	6.7	25	750
0.1148	0.1133	0.0836	0.1039	0.0615667	0.0175963	7.2	25	750
0.0816	0.0799	0.0769	0.0794667	0.0366333	0.00237978	7.7	25	750
0.0934	0.0854	0.0802	0.0863333	0.0436333	0.00664931	8.2	25	750
0.072	0.0764	0.0723	0.0735667	0.0308333	0.00245832	8.6	25	750
0.0833	0.0854	0.0821	0.0836	0.0407667	0.00167033	6.3	25	1000
0.0739	0.0746	0.0712	0.0732333	0.0288	0.00179537	6.7	25	1000
0.1148	0.0651	0.0898	0.0899	0.0470667	0.0248502	7.2	25	1000
0.0459	0.0464	0.0465	0.0462667	0.003	0.000321456	7.7	25	1000
0.0432	0.0437	0.0438	0.0435667	0.000666667	0.000321454	8.2	25	1000
0.0866	0.0965	0.081	0.0880333	0.0237333	0.00784878	8.6	25	1000
0.145	0.1527	0.141	0.146233	0.1038	0.00594671	6.3	50	750
0.0856	0.179	0.0975	0.1207	0.0773667	0.0508387	6.7	50	750
0.1069	0.0974	0.0831	0.0958	0.0534667	0.0119804	7.2	50	750
0.0928	0.0843	0.0892	0.0887667	0.0459333	0.00426654	7.7	50	750
0.0693	0.066	0.0661	0.0671333	0.0244333	0.00187706	8.2	50	750
0.1073	0.1088	0.0825	0.0995333	0.0568	0.0147704	8.6	50	750
0.0916	0.0923	0.1221	0.102	0.0591667	0.0174106	6.3	50	1000
0.2143	0.2806	0.2552	0.250033	0.2056	0.0334506	6.7	50	1000
0.1642	0.1618	0.1597	0.1619	0.119067	0.00225166	7.2	50	1000
0.1591	0.1651	0.174	0.166067	0.1228	0.00749689	7.7	50	1000
0.1036	0.1058	0.1062	0.1052	0.0623	0.0014	8.2	50	1000
0.08	0.0739	0.0697	0.0745333	0.0102333	0.00517912	8.6	50	1000
0.3648	0.3514	0.3996	0.371933	0.3295	0.0248792	6.3	100	750
0.294	0.2749	0.2447	0.2712	0.227867	0.0248574	6.7	100	750
0.1015	0.0771	0.0821	0.0869	0.0445667	0.0128888	7.2	100	750
0.16	0.1345	0.1578	0.150767	0.107933	0.0141302	7.7	100	750
0.1217	0.0969	0.0856	0.1014	0.0587	0.0184659	8.2	100	750
0.1294	0.1142	0.1135	0.119033	0.0763	0.00898462	8.6	100	750
0.2161	0.2019	0.2314	0.216467	0.173633	0.0147534	6.3	100	1000
0.1107	0.0919	0.0861	0.0962333	0.0518	0.0128598	6.7	100	1000
0.121	0.1121	0.107	0.113367	0.0705333	0.00708543	7.2	100	1000
0.147	0.1425	0.1427	0.144067	0.1008	0.00254231	7.7	100	1000
0.1523	0.1626	0.2018	0.172233	0.129333	0.0261183	8.2	100	1000
0.2828	0.252	0.2717	0.268833	0.204533	0.0155988	8.6	100	1000
