# Supplementary material for: Dissecting the phase separation and oligomerization activities of the carboxysome positioning protein McdB
Source: eLife journal article supplement (doi:10.7554/elife.81362), 2023-09-05
Supplement: supp [file Figure 5-figure supplement 3-source data 1.xlsx]

## Sheet: SEC-MALS
vol (ml)	WT UV	WT MW	CTD 2Q left UV	CTD 2Q left MW	CTD all UV	CTD all MW
0.002	0		0		0
0.01	0		0		0
0.019	0		0		0.001
0.027	0		0		0.001
0.036	0		0		0.001
0.044	0		0		0.001
0.053	0		0		0.001
0.061	0		0		0.001
0.069	0		0		0.001
0.078	0		0		0.001
0.086	0		0		0.001
0.095	0		0		0.001
0.103	0		0		0.001
0.111	0		0		0.001
0.12	0		0		0.001
0.128	0		0		0.001
0.137	0		0		0.001
0.145	0		0		0.001
0.154	0		0		0.001
0.162	0		0		0.001
0.17	0		0		0.001
0.179	0		0		0.001
0.187	0		0		0.001
0.196	0		0		0.001
0.204	0		0		0.001
0.212	0		0		0.001
0.221	0		0		0.001
0.229	0		0		0.001
0.238	0		0		0.001
0.246	0		0		0.001
0.255	0		0		0.001
0.263	0		0		0.001
0.271	0		0		0.001
0.28	0		0		0.001
0.288	0		0		0.001
0.297	0		0		0.001
0.305	0		0		0.001
0.313	0		0		0.001
0.322	0		0		0.001
0.33	0		0		0.001
0.339	0		0		0.001
0.347	0		0		0.001
0.356	0		0		0.001
0.364	0		0		0.001
0.372	0		0		0.001
0.381	0		0		0.001
0.389	0		0		0.001
0.398	0		0		0.001
0.406	0		0		0.001
0.414	0		0		0.001
0.423	0		0		0.001
0.431	0		0		0.001
0.44	0		0		0.001
0.448	0		0		0.001
0.457	0		0		0.001
0.465	0		0		0.001
0.473	0		0		0.001
0.482	0		0		0.001
0.49	0		0		0.001
0.499	0		0		0.001
0.507	0		0		0.001
0.516	0		0		0.001
0.524	0		0		0.001
0.532	0		0		0.001
0.541	0		0		0.001
0.549	0		0		0.001
0.558	0		0		0.001
0.566	0		0		0.001
0.574	0		0		0.001
0.583	0		0		0.001
0.591	0		0		0.001
0.6	0		0		0.001
0.608	0		0		0.001
0.617	0		0		0.001
0.625	0		0		0.001
0.633	0		0		0.001
0.642	0		0		0.001
0.65	0		0		0.001
0.659	0		0		0.001
0.667	0		0		0.001
0.675	0		0		0.001
0.684	0		0		0.001
0.692	0		0		0.001
0.701	0		0		0.001
0.709	0		0		0.001
0.718	0		0		0.001
0.726	0		0		0.001
0.734	0		0		0.001
0.743	0		0		0.001
0.751	0		0		0.001
0.76	0		0		0.001
0.768	0		0		0.001
0.776	0		0		0.001
0.785	0		0		0.001
0.793	0		0		0.001
0.802	0		0		0.001
0.81	0		0		0.001
0.819	0		0		0.001
0.827	0		0		0.001
0.835	0		0		0.001
0.844	0		0		0.001
0.852	0		0		0.001
0.861	0		0		0.001
0.869	0		0		0.001
0.877	0		0		0.001
0.886	0		0		0.001
0.894	0		0		0.001
0.903	0		0		0.001
0.911	0		0		0.001
0.92	0		0		0.001
0.928	0		0		0.001
0.936	0		0		0.001
0.945	0		0		0.001
0.953	0		0		0.001
0.962	0		0		0.001
0.97	0		0		0.001
0.978	0		0		0.001
0.987	0		0		0.001
0.995	0		0		0.001
1.004	0		0		0.001
1.012	0		0		0.001
1.021	0		0		0.001
1.029	0		0		0.001
1.037	0		0		0.001
1.046	0		0		0.001
1.054	0		0		0.001
1.063	0		0		0.001
1.071	0		0		0.001
1.079	0		0		0.001
1.088	0		0		0.001
1.096	0		0		0.001
1.105	0		0		0.001
1.113	0		0		0.001
1.122	0		0		0.001
1.13	0		0		0.001
1.138	0		0		0.001
1.147	0		0		0.001
1.155	0		0		0.001
1.164	0		0		0.001
1.172	0		0		0.001
1.18	0		0		0.001
1.189	0		0		0.001
1.197	0		0		0.001
1.206	0		0		0.001
1.214	0		0		0.001
1.223	0		0		0.001
1.231	0		0		0.001
1.239	0		0		0.001
1.248	0		0		0.001
1.256	0		0		0.001
1.265	0		0		0.001
1.273	0		0		0.001
1.281	0		0		0.001
1.29	0		0		0.001
1.298	0		0		0.001
1.307	0		0		0.001
1.315	0		0		0.001
1.324	0		0		0.001
1.332	0		0		0.001
1.34	0		0		0.001
1.349	0		0		0.001
1.357	0		0		0.001
1.366	0		0		0.001
1.374	0		0		0.001
1.382	0		0		0.001
1.391	0		0		0.001
1.399	0		0		0.001
1.408	0		0		0.001
1.416	0		0		0.001
1.425	0		0		0.001
1.433	0		0		0.001
1.441	0		0		0.001
1.45	0		0		0.001
1.458	0		0		0.001
1.467	0		0		0.001
1.475	0		0		0.001
1.483	0		0		0.001
1.492	0		0		0.001
1.5	0		0		0.001
1.509	0		0		0.001
1.517	0		0		0.001
1.526	0		0		0.001
1.534	0		0		0.001
1.542	0		0		0
1.551	0		0		0
1.559	0		0		0
1.568	0		0		0
1.576	0		0		0
1.584	0		0		0
1.593	0		0		0
1.601	0		0		0
1.61	0		0		0
1.618	0		0		0
1.627	0		0		0
1.635	0		0		0
1.643	0		0		0
1.652	0		0		0
1.66	0		0		0
1.669	0		0		0
1.677	0		0		0
1.686	0		0		0
1.694	0		0		0
1.702	0		0		0
1.711	0		0		0
1.719	0		0		0
1.728	0		0		0
1.736	0		0		0
1.744	0		0		0
1.753	0		0		0
1.761	0		0		0
1.77	0		0		0
1.778	0		0		0
1.787	0		0		0
1.795	0		0		0
1.803	0		0		0
1.812	0		0		0
1.82	0		0		0
1.829	0		0		0
1.837	0		0		0
1.845	0		0		0
1.854	0		0		0
1.862	0		0		0
1.871	0		0		0
1.879	0		0		0
1.888	0		0		0
1.896	0		0		0
1.904	0		0		0
1.913	0		0		0
1.921	0		0		0
1.93	0		0		0
1.938	0		0		0
1.946	0		0		0
1.955	0		0		0
1.963	0		0		0
1.972	0		0		0
1.98	0		0		0
1.989	0		0		0
1.997	0		0		0
2.005	0		0		0
2.014	0		0		0
2.022	0		0		0
2.031	0		0		0
2.039	0		0		0
2.047	0		0		0
2.056	0		0		0
2.064	0		0		0
2.073	0		0		0
2.081	0		0		0
2.09	0		0		0
2.098	0		0		0
2.106	0		0		0
2.115	0		0		0
2.123	0		0		0
2.132	0		0		0
2.14	0		0		0
2.148	0		0		0
2.157	0		0		0
2.165	0		0		0
2.174	0		0		0
2.182	0		0		0
2.191	0		0		0
2.199	0		0		0
2.207	0		0		0
2.216	0		0		0
2.224	0		0		0
2.233	0		0		0
2.241	0		0		0
2.249	0		0		0
2.258	0		0		0
2.266	0		0		0
2.275	0		0		0
2.283	0		0		0
2.292	0		0		0
2.3	0		0		0
2.308	0		0		0
2.317	0		0		0
2.325	0		0		0
2.334	0		0		0
2.342	0		0		0
2.35	0		0		0
2.359	0		0		0
2.367	0		0		0
2.376	0		0		0
2.384	0		0		0
2.393	0		0		0
2.401	0		0		0
2.409	0		0		0
2.418	0		0		0
2.426	0		0		0
2.435	0		0		0
2.443	0		0		0
2.451	0		0		0
2.46	0		0		0
2.468	0		0		0
2.477	0		0		0
2.485	0		0		0
2.494	0		0		0
2.502	0		0		0
2.51	0		0		0
2.519	0		0		0
2.527	0		0		0
2.536	0		0		0
2.544	0		0		0
2.552	0		0		0
2.561	0		0.001		0
2.569	0		0.001		0
2.578	0		0.001		0
2.586	0		0.001		0
2.595	0		0.001		0
2.603	0		0.001		0
2.611	0		0.001		0
2.62	0		0.001		0
2.628	0		0.001		0
2.637	0		0.001		0
2.645	0		0.001		0
2.653	0		0.001		0
2.662	0		0.001		0
2.67	0		0.001		0
2.679	0		0.001		0
2.687	0		0.001		0
2.696	0		0.001		0
2.704	0		0.001		0
2.712	0		0.001		0
2.721	0		0.001		0
2.729	0		0.001		0
2.738	0		0.001		0
2.746	0		0.001		0
2.754	0		0.001		0
2.763	0		0.001		0
2.771	0		0.001		0
2.78	0		0.001		0
2.788	0		0.001		0
2.797	0		0.001		0
2.805	0		0.001		0
2.813	0		0.001		0
2.822	0		0.001		0
2.83	0		0.001		0
2.839	0		0.001		0
2.847	0		0.001		0
2.856	0		0.001		0
2.864	0		0.001		0
2.872	0		0.001		0
2.881	0		0.001		0
2.889	0		0.001		0
2.898	0		0.001		0
2.906	0		0.001		0
2.914	0		0.001		0
2.923	0		0.001		0
2.931	0		0.001		0
2.94	0		0.001		0
2.948	0		0.001		0
2.957	0		0.001		0
2.965	0		0.001		0
2.973	0		0.001		0
2.982	0		0.001		0
2.99	0		0.001		0
2.999	0		0.001		0
3.007	0		0.001		0
3.015	0		0.001		0
3.024	0		0.001		0
3.032	0		0.001		0
3.041	0		0.001		0
3.049	0		0.001		0
3.058	0		0.001		0
3.066	0		0.001		0
3.074	0		0.001		0
3.083	0		0.001		0
3.091	0		0.001		0
3.1	0		0.001		0
3.108	0		0.001		0
3.116	0		0.001		0
3.125	0		0.001		0
3.133	0		0.001		0
3.142	0		0.001		0
3.15	0		0.001		0
3.159	0		0.001		0
3.167	0		0.001		0
3.175	0		0.001		0
3.184	0		0.001		0
3.192	0		0.001		0
3.201	0		0.001		0
3.209	0		0.001		0
3.217	0		0.001		0
3.226	0		0.001		0
3.234	0		0.001		0
3.243	0		0.001		0
3.251	0		0.001		0
3.26	0		0.001		0
3.268	0		0.001		0
3.276	0		0.001		0
3.285	0		0.001		0
3.293	0		0.001		0
3.302	0		0.001		0
3.31	0		0.001		0
3.318	0		0.001		0
3.327	0		0.001		0
3.335	0		0.001		0
3.344	0		0.001		0
3.352	0		0.001		0
3.361	0		0.001		0
3.369	0		0.001		0
3.377	0		0.001		0
3.386	0		0.001		0
3.394	0		0.001		0
3.403	0		0.001		0
3.411	0		0.001		0
3.419	0		0.001		0
3.428	0		0.001		0
3.436	0		0.001		0
3.445	0		0.001		0
3.453	0		0.001		0
3.462	0		0.001		0
3.47	0		0.001		0
3.478	0		0.001		0
3.487	0		0.001		0
3.495	0		0.001		0
3.504	0		0.001		0
3.512	0		0.001		0
3.52	0		0.001		0
3.529	0		0.001		0
3.537	0		0.001		0
3.546	0		0.001		0
3.554	0		0.001		0
3.563	0		0.001		0
3.571	0		0.001		0
3.579	0		0.001		0
3.588	0		0.001		0
3.596	0		0.001		0
3.605	0		0.001		0
3.613	0		0.001		0
3.621	0		0.001		0
3.63	0		0.001		0
3.638	0		0.001		0
3.647	0		0.001		0
3.655	0		0.001		0
3.664	0		0.001		0
3.672	0		0.001		0
3.68	0		0.001		0
3.689	0		0.001		0
3.697	0		0.001		0
3.706	0		0.001		0
3.714	0		0.001		0
3.722	0		0.001		0
3.731	0		0.001		0
3.739	0		0.001		0
3.748	0		0.001		0
3.756	0		0.001		0
3.765	0		0.001		0
3.773	0		0.001		0
3.781	0		0.001		0
3.79	0		0.001		0
3.798	0		0.001		0
3.807	0		0.001		0
3.815	0		0.001		0
3.823	0		0.001		0
3.832	0		0.001		0
3.84	0		0.001		0
3.849	0		0.001		0
3.857	0		0.001		0
3.866	0		0.001		0
3.874	0		0.001		0
3.882	0		0.001		0
3.891	0		0.001		0
3.899	0		0.001		0
3.908	0		0.001		0
3.916	0		0.001		0
3.925	0		0.001		0
3.933	0		0.001		0
3.941	0		0.001		0
3.95	0		0.001		0
3.958	0		0.001		0
3.967	0		0.001		0
3.975	0		0.001		0
3.983	0		0.001		0
3.992	0		0.001		0
4	0		0.001		0
4.009	0		0.001		0
4.017	0		0.001		0
4.026	0		0.001		0
4.034	0		0		0
4.042	0		0		0
4.051	0		0		0
4.059	0		0		0
4.068	0		0		0
4.076	0		0		0
4.084	0		0		0
4.093	0		0		0
4.101	0		0		0
4.11	0		0		0
4.118	0		0		0
4.127	0		0		0
4.135	0		0		0
4.143	0		0		0
4.152	0		0		0
4.16	0		0		0
4.169	0		0		0
4.177	0		0		0
4.185	-0.001		0		0
4.194	-0.001		0		0
4.202	-0.001		0		0
4.211	-0.001		0		0
4.219	-0.001		0		0
4.228	-0.001		0		0
4.236	0		0		0
4.244	0		0		0
4.253	0		0		0
4.261	0		0		0
4.27	0		0		0
4.278	0		0		0
4.286	0		0		0
4.295	0		0		0
4.303	0		0		0
4.312	0		0		0
4.32	0		0		0
4.329	0		0		0
4.337	0		0		0
4.345	0		0		0
4.354	0		0		0
4.362	0		0		0
4.371	0		0		0
4.379	0		0		0
4.387	0		0		0
4.396	0		0		0
4.404	0		0		0
4.413	0		0		0
4.421	-0.001		0		0
4.43	-0.001		0		0
4.438	-0.001		0		0
4.446	-0.001		0		0
4.455	-0.001		0		0
4.463	-0.001		0		0
4.472	-0.001		0		0
4.48	-0.001		0		0
4.488	-0.001		0		0
4.497	-0.001		0		0
4.505	-0.001		0		0
4.514	-0.001		0		0
4.522	-0.001		0		0
4.531	-0.001		0		0
4.539	-0.001		0		0
4.547	-0.001		0		0
4.556	-0.001		0		0
4.564	-0.001		0		0
4.573	-0.001		0		0
4.581	-0.001		0		0
4.589	-0.001		0		0
4.598	-0.001		0		0
4.606	-0.001		0		0
4.615	-0.001		0		0
4.623	-0.001		0		0
4.632	-0.001		0		0
4.64	-0.001		0		0
4.648	-0.001		0		0
4.657	-0.001		0		0
4.665	-0.001		0		0
4.674	-0.001		0		0
4.682	-0.001		0		0
4.69	-0.001		0		0
4.699	-0.001		0		0
4.707	-0.001		0		0
4.716	-0.001		0		0
4.724	-0.001		0		0
4.733	-0.001		0		0
4.741	-0.001		0		0
4.749	-0.001		0		0
4.758	-0.001		0		0
4.766	-0.001		0		0
4.775	-0.001		0		0
4.783	-0.001		0		0
4.791	-0.001		0		0
4.8	-0.001		0		0
4.808	-0.001		0		0
4.817	-0.001		0		0
4.825	-0.001		0		0
4.834	-0.001		0		0
4.842	-0.001		0		0
4.85	-0.001		0		0
4.859	-0.001		0		0
4.867	-0.001		0		0
4.876	-0.001		0		0
4.884	-0.001		0		0
4.892	-0.001		0		0
4.901	-0.001		0		0
4.909	-0.001		0		0
4.918	-0.001		0		0
4.926	-0.001		0		0
4.935	-0.001		0		0
4.943	-0.001		0		0
4.951	-0.001		0		0
4.96	-0.001		0		0
4.968	-0.001		0		0
4.977	-0.001		0		0
4.985	-0.001		0		0
4.993	-0.001		0		0
5.002	-0.001		0		0
5.01	-0.001		0		0
5.019	-0.001		0		0
5.027	-0.001		0		0
5.036	-0.001		0		0
5.044	-0.001		0		0
5.052	-0.001		0		0
5.061	-0.001		0		0
5.069	-0.001		0		0
5.078	-0.001		0		0
5.086	-0.001		0		0
5.095	-0.001		0		0
5.103	-0.001		0		0
5.111	-0.001		0		0
5.12	-0.001		0		0
5.128	-0.001		0		0
5.137	-0.001		0		0
5.145	-0.001		0		0
5.153	-0.001		0		0
5.162	-0.001		0		0
5.17	-0.001		0		0
5.179	-0.001		0		0
5.187	-0.001		0		0
5.196	-0.001		0		0
5.204	-0.001		0		0
5.212	-0.001		0		0
5.221	-0.001		0		0
5.229	-0.001		0		0
5.238	-0.001		0		0
5.246	-0.001		0		0
5.254	-0.001		0		0
5.263	-0.001		0		0
5.271	-0.001		0		0
5.28	-0.001		0		0
5.288	-0.001		0		0
5.297	-0.001		0		0
5.305	-0.001		0		0
5.313	-0.001		0		0
5.322	-0.001		0		0
5.33	-0.001		0		0
5.339	-0.001		0		0
5.347	-0.001		0		0
5.355	-0.001		0		0
5.364	-0.001		0		0
5.372	-0.001		0		0
5.381	-0.001		0		0
5.389	-0.001		0		0
5.398	-0.001		0		0
5.406	-0.001		0		0
5.414	-0.001		0		0
5.423	-0.001		0		0
5.431	-0.001		0		0
5.44	-0.001		0		0
5.448	-0.001		0		0
5.456	-0.001		0		0
5.465	-0.001		0		0
5.473	-0.001		0		0
5.482	-0.001		0		0
5.49	-0.001		0		0
5.499	-0.001		0		0
5.507	-0.001		0		0
5.515	-0.001		0		0
5.524	-0.001		0		0
5.532	-0.001		0		0
5.541	-0.001		0		0
5.549	-0.001		0		0
5.557	-0.001		0		0
5.566	-0.001		0		0
5.574	-0.001		0		0
5.583	-0.001		0		0
5.591	-0.001		0		0
5.6	-0.001		0		0
5.608	-0.001		0		0
5.616	-0.001		0		0
5.625	-0.001		0		0
5.633	-0.001		0		0
5.642	-0.001		0		0
5.65	-0.001		0		0
5.658	-0.001		0		0
5.667	-0.001		0		0
5.675	-0.001		0		0
5.684	-0.001		0		0
5.692	-0.001		0		0
5.701	-0.001		0		0
5.709	-0.001		0		0
5.717	-0.001		0		0
5.726	-0.001		0		0
5.734	-0.001		0		0
5.743	-0.001		0		0
5.751	-0.001		0		0
5.759	-0.001		0		0
5.768	-0.001		0		0
5.776	-0.001		0		0
5.785	-0.001		0		0
5.793	-0.001		0		0
5.802	-0.001		0		0
5.81	-0.001		0		0
5.818	-0.001		0		0
5.827	-0.001		0		0
5.835	-0.001		0		0
5.844	-0.001		0		0
5.852	-0.001		0		0
5.86	-0.001		0		0
5.869	-0.001		0		0
5.877	-0.001		0		0
5.886	-0.001		0		0
5.894	-0.001		0		0
5.903	-0.001		0		0
5.911	-0.001		0		0
5.919	-0.001		0		0
5.928	-0.001		0		0
5.936	-0.001		0		0
5.945	-0.001		0		0
5.953	-0.001		0		0
5.961	-0.001		0		0
5.97	-0.001		0		0
5.978	-0.001		0		0
5.987	-0.001		0		0
5.995	-0.001		0		0
6.004	-0.001		0		0
6.012	-0.001		0		0
6.02	-0.001		0		0
6.029	-0.001		0		0
6.037	-0.001		0		0
6.046	-0.001		0		0
6.054	-0.001		0		0
6.062	-0.001		0		0
6.071	-0.001		0		0
6.079	-0.001		0		0
6.088	-0.001		0		0
6.096	-0.001		0		0
6.105	-0.001		0		0
6.113	-0.001		0		0
6.121	-0.001		0		0
6.13	-0.001		0		0
6.138	-0.001		0		0
6.147	-0.001		0		0
6.155	-0.001		0		0
6.163	-0.001		0		0
6.172	-0.001		0		0
6.18	-0.001		0		0
6.189	-0.001		0		0
6.197	-0.001		0		0
6.206	-0.001		0		0
6.214	-0.001		0		0
6.222	-0.001		0		0
6.231	-0.001		0		0
6.239	-0.001		0		0
6.248	-0.001		0		0
6.256	-0.001		0		0
6.265	-0.001		0		0
6.273	-0.001		0		0
6.281	-0.001		0		0
6.29	-0.001		0		0
6.298	-0.001		0		0
6.307	-0.001		0		0
6.315	-0.001		0		0
6.323	-0.001		0		0
6.332	-0.001		0		0
6.34	-0.001		0		0
6.349	-0.001		0		0
6.357	-0.001		0		0
6.366	-0.001		0		0
6.374	-0.001		0		0
6.382	-0.001		0		0
6.391	-0.001		0		0
6.399	-0.001		0		0
6.408	-0.001		0		0
6.416	-0.001		0		0
6.424	-0.001		0		0
6.433	-0.001		0		0
6.441	-0.001		0		0
6.45	-0.001		0		0
6.458	-0.001		0		0
6.467	-0.001		0		0
6.475	-0.001		0		0
6.483	-0.001		0		0
6.492	-0.001		0		0
6.5	-0.001		0		0
6.509	-0.001		0		0
6.517	-0.001		0		0
6.525	-0.001		0		0
6.534	-0.001		0		0
6.542	-0.001		0		0
6.551	-0.001		0		0
6.559	-0.001		0		0
6.568	-0.001		0		0
6.576	-0.001		0		0
6.584	-0.001		0		0
6.593	-0.001		0		0
6.601	-0.001		0		0
6.61	-0.001		0		0
6.618	-0.001		0		0
6.626	-0.001		0		0
6.635	-0.001		0		0
6.643	-0.001		0		0
6.652	-0.001		0		0
6.66	-0.001		0		0
6.669	-0.001		0		0
6.677	-0.001		0		0
6.685	-0.001		0		0
6.694	-0.001		0		0
6.702	-0.001		0		0
6.711	-0.001		0		0
6.719	-0.001		0		0
6.727	-0.001		0		0
6.736	-0.001		0		0
6.744	-0.001		0		0
6.753	-0.001		0		0
6.761	-0.001		0		0
6.77	-0.001		0		0
6.778	-0.001		0		0
6.786	-0.001		0		0
6.795	-0.001		0		0
6.803	-0.001		0		0
6.812	-0.001		0		0
6.82	-0.001		0		0
6.828	-0.001		0		0
6.837	-0.001		0		0
6.845	-0.001		0		0
6.854	-0.001		0		0
6.862	-0.001		0		0
6.871	-0.001		0		0
6.879	-0.001		0		0
6.887	-0.001		0		0
6.896	-0.001		0		0
6.904	-0.001		0		0
6.913	-0.001		0		0
6.921	-0.001		0		0
6.929	-0.001		0		0
6.938	-0.001		0		0
6.946	-0.001		0		0
6.955	-0.001		0		0
6.963	-0.001		0		0
6.972	-0.001		0		0
6.98	-0.001		0		0
6.988	-0.001		0		0
6.997	-0.001		0		0
7.005	-0.001		0		0
7.014	-0.001		0		0
7.022	-0.001		0		0
7.03	-0.001		0		0
7.039	-0.001		0		0
7.047	-0.001		0		0
7.056	-0.001		0		0
7.064	-0.001		0		0
7.073	-0.001		0		0
7.081	-0.001		0		0
7.089	-0.001		0		0
7.098	-0.001		0		0
7.106	-0.001		0		0
7.115	-0.001		0		0
7.123	-0.001		0		0
7.131	-0.001		0.001		0
7.14	-0.001		0.001		0
7.148	-0.001		0.001		0
7.157	-0.001		0.001		0
7.165	-0.001		0.001		0
7.174	-0.001		0.001		0
7.182	-0.001		0.001		0
7.19	-0.001		0.001		0
7.199	-0.001		0.001		0
7.207	-0.001		0.001		0
7.216	-0.001		0.001		0
7.224	-0.001		0.001		0
7.232	-0.001		0.001		0
7.241	-0.001		0.001		0
7.249	-0.001		0.001		0
7.258	-0.001		0		0
7.266	-0.001		0		0
7.275	-0.001		0		0
7.283	-0.001		0		0
7.291	-0.001		0		0
7.3	-0.001		0		0
7.308	-0.001		0		0
7.317	-0.001		0		0
7.325	-0.001		0		0
7.333	-0.001		0		0
7.342	-0.001		0		0
7.35	-0.001		0		0
7.359	-0.001		0		0
7.367	-0.001		0		0
7.376	-0.001		0		0
7.384	-0.001		0		0
7.392	-0.001		0		0
7.401	-0.001		0		0
7.409	-0.001		0		0
7.418	-0.001		0		0
7.426	-0.001		0		0
7.435	-0.001		0		0
7.443	-0.001		0		0
7.451	-0.001		0		0
7.46	-0.001		0		0
7.468	-0.001		0		0
7.477	-0.001		0		0
7.485	-0.001		0		0
7.493	-0.001		0		0
7.502	-0.001		0		0
7.51	-0.001		0		0
7.519	-0.001		0		0
7.527	-0.001		0		0
7.536	-0.001		0		0
7.544	-0.001		0		0
7.552	-0.001		0		0
7.561	-0.001		0		0
7.569	-0.001		0		0
7.578	-0.001		0		0
7.586	-0.001		0		0
7.594	-0.001		0		0
7.603	-0.001		0		0
7.611	-0.001		0		0
7.62	-0.001		0		0
7.628	-0.001		0		0
7.637	-0.001		0		0
7.645	-0.001		0		0
7.653	-0.001		0		0
7.662	-0.001		0		0
7.67	-0.001		0		0
7.679	-0.001		0		0
7.687	-0.001		0		0
7.695	-0.001		0		0
7.704	-0.001		0		0
7.712	-0.001		0		0
7.721	-0.001		0		0
7.729	-0.001		0		0
7.738	-0.001		0		0
7.746	-0.001		0		0
7.754	-0.001		0		0
7.763	-0.001		0		0
7.771	-0.001		0		0
7.78	-0.001		0		0
7.788	-0.001		0		0
7.796	-0.001		0		0
7.805	-0.001		0		0
7.813	-0.001		0		0
7.822	-0.001		0		0
7.83	-0.001		0		0
7.839	-0.001		0		0
7.847	-0.001		0		0
7.855	-0.001		0		0
7.864	-0.001		0		0
7.872	-0.001		0		0
7.881	-0.001		0		0
7.889	-0.001		0		0
7.897	-0.001		0		0
7.906	-0.001		0		0
7.914	-0.001		0		0
7.923	-0.001		0		0
7.931	-0.001		0		0
7.94	-0.001		0		0
7.948	-0.001		0		0
7.956	-0.001		0		0
7.965	-0.001		0		0
7.973	-0.001		0		0
7.982	-0.001		0		0
7.99	-0.001		0		0
7.998	-0.001		0		0
8.007	-0.001		0		0
8.015	-0.001		0		0
8.024	-0.001		0		0
8.032	-0.001		0		0
8.041	-0.001		0		0
8.049	-0.001		0		0
8.057	-0.001		0		0
8.066	-0.001		0		0
8.074	-0.001		0		0
8.083	-0.001		0		0
8.091	-0.001		0		0
8.099	-0.001		0		0
8.108	-0.001		0		0
8.116	-0.001		0		0
8.125	-0.001		0		0
8.133	-0.001		0		0
8.142	-0.001		0		0
8.15	-0.001		0		0
8.158	-0.001		0		0
8.167	-0.001		0		0
8.175	-0.001		0		0
8.184	-0.001		0		0
8.192	-0.001		0		0
8.2	-0.001		0		0
8.209	-0.001		0		0
8.217	-0.001		0		0
8.226	-0.001		0		0
8.234	0		0		0
8.243	0		0		0
8.251	0		0		0
8.259	0		0		0
8.268	0		0		0
8.276	0		0		0
8.285	0		0		0
8.293	0		0		0
8.301	0		0		0
8.31	0		0		0.001
8.318	0		0		0.001
8.327	0		0		0.001
8.335	0		0		0.001
8.344	0		0		0.001
8.352	0.001		0		0.001
8.36	0.001		0		0.001
8.369	0.001		0		0.001
8.377	0.001		0		0.001
8.386	0.001		0		0.001
8.394	0.001		0		0.001
8.402	0.001		0		0.001
8.411	0.001		0		0.001
8.419	0.001		0		0.002
8.428	0.001		0		0.002
8.436	0.001		0		0.002
8.445	0.001		0		0.002
8.453	0.001		0		0.002
8.461	0.001		0		0.002
8.47	0.001		0		0.002
8.478	0.001		0		0.002
8.487	0.001		0		0.002
8.495	0.001		0		0.002
8.504	0.002		0		0.002
8.512	0.002		0		0.002
8.52	0.002		0		0.002
8.529	0.002		0		0.002
8.537	0.002		0		0.002
8.546	0.002		0		0.002
8.554	0.002		0		0.002
8.562	0.002		0		0.002
8.571	0.002		0		0.002
8.579	0.002		0		0.002
8.588	0.002		0		0.002
8.596	0.002		0		0.002
8.605	0.002		0		0.002
8.613	0.002		0		0.002
8.621	0.002		0		0.002
8.63	0.002		0		0.002
8.638	0.002		0		0.002
8.647	0.002		0		0.002
8.655	0.002		0		0.002
8.663	0.002		0		0.002
8.672	0.002		0		0.002
8.68	0.002		0		0.002
8.689	0.002		0		0.002
8.697	0.002		0		0.002
8.706	0.002		0		0.002
8.714	0.002		0		0.002
8.722	0.002		0		0.002
8.731	0.002		0		0.003
8.739	0.002		0		0.003
8.748	0.002		0		0.003
8.756	0.002		0		0.003
8.764	0.002		0		0.003
8.773	0.002		0		0.003
8.781	0.002		0		0.003
8.79	0.002		0		0.003
8.798	0.002		0		0.003
8.807	0.002		0		0.003
8.815	0.002		0		0.003
8.823	0.002		0		0.003
8.832	0.002		0		0.003
8.84	0.002		0		0.003
8.849	0.002		0		0.003
8.857	0.002		0		0.003
8.865	0.002		0		0.003
8.874	0.002		0		0.003
8.882	0.002		0		0.003
8.891	0.002		0		0.003
8.899	0.002		0		0.003
8.908	0.002		0		0.003
8.916	0.002		0		0.003
8.924	0.002		0		0.003
8.933	0.002		0		0.003
8.941	0.002		0		0.003
8.95	0.002		0		0.003
8.958	0.002		0		0.003
8.966	0.002		0		0.003
8.975	0.002		0		0.003
8.983	0.002		0		0.003
8.992	0.002		0		0.003
9	0.002		0		0.003
9.009	0.002		0		0.003
9.017	0.002		0		0.003
9.025	0.002		0		0.002
9.034	0.002		0		0.002
9.042	0.002		0		0.002
9.051	0.002		0		0.002
9.059	0.002		0		0.002
9.067	0.002		0		0.002
9.076	0.002		0		0.002
9.084	0.002		0		0.002
9.093	0.002		0		0.002
9.101	0.002		0		0.002
9.11	0.002		0		0.002
9.118	0.002		0		0.002
9.126	0.002		0		0.002
9.135	0.002		0		0.002
9.143	0.002		0		0.002
9.152	0.002		0		0.002
9.16	0.002		0		0.002
9.168	0.002		0		0.002
9.177	0.002		0		0.002
9.185	0.002		0		0.002
9.194	0.002		0		0.002
9.202	0.002		0		0.002
9.211	0.002		0		0.002
9.219	0.002		0		0.002
9.227	0.002		0		0.002
9.236	0.002		0		0.002
9.244	0.002		0		0.002
9.253	0.002		0		0.002
9.261	0.002		0		0.002
9.269	0.002		0		0.002
9.278	0.002		0		0.002
9.286	0.002		0		0.002
9.295	0.002		0		0.002
9.303	0.002		0		0.002
9.312	0.002		0		0.002
9.32	0.002		0		0.002
9.328	0.002		0		0.002
9.337	0.002		0		0.002
9.345	0.002		0		0.002
9.354	0.002		0		0.002
9.362	0.002		0		0.002
9.37	0.002		0		0.002
9.379	0.002		0		0.002
9.387	0.002		0		0.002
9.396	0.002		0		0.002
9.404	0.002		0		0.002
9.413	0.002		0		0.002
9.421	0.002		0		0.002
9.429	0.002		0		0.002
9.438	0.002		0		0.002
9.446	0.002		0		0.002
9.455	0.002		0		0.002
9.463	0.002		0		0.003
9.471	0.002		0		0.003
9.48	0.002		0		0.003
9.488	0.002		0		0.003
9.497	0.002		0		0.003
9.505	0.002		0		0.003
9.514	0.002		0		0.003
9.522	0.002		0		0.003
9.53	0.002		0		0.003
9.539	0.002		0		0.003
9.547	0.002		0		0.003
9.556	0.002		0		0.003
9.564	0.002		0		0.003
9.572	0.002		0		0.003
9.581	0.002		0		0.003
9.589	0.002		0		0.003
9.598	0.002		0		0.003
9.606	0.002		0		0.003
9.615	0.002		0		0.003
9.623	0.002		0		0.003
9.631	0.002		0		0.003
9.64	0.002		0		0.003
9.648	0.002		0		0.003
9.657	0.002		0		0.003
9.665	0.002		0		0.003
9.674	0.002		0		0.003
9.682	0.002		0		0.003
9.69	0.002		0		0.003
9.699	0.002		0		0.003
9.707	0.002		0		0.003
9.716	0.002		0		0.003
9.724	0.002		0		0.003
9.732	0.002		0		0.003
9.741	0.002		0		0.003
9.749	0.002		0		0.003
9.758	0.002		0		0.003
9.766	0.002		0		0.003
9.775	0.001		0		0.003
9.783	0.001		0		0.003
9.791	0.001		0		0.003
9.8	0.001		0		0.003
9.808	0.001		0		0.003
9.817	0.001		0		0.003
9.825	0.001		0		0.003
9.833	0.001		0		0.003
9.842	0.001		0		0.003
9.85	0.001		0		0.003
9.859	0.001		0		0.003
9.867	0.001		0		0.003
9.876	0.001		0		0.003
9.884	0.001		0		0.003
9.892	0.001		0		0.003
9.901	0.001		0		0.003
9.909	0.001		0		0.003
9.918	0.001		0		0.003
9.926	0.001		0		0.003
9.934	0.001		0		0.003
9.943	0.001		0		0.003
9.951	0.001		0		0.003
9.96	0.001		0		0.003
9.968	0.001		0		0.003
9.977	0.001		0		0.003
9.985	0.001		0		0.003
9.993	0.001		0		0.003
10.002	0.001		0		0.003
10.01	0.001		0		0.003
10.019	0.001		0		0.003
10.027	0.001		0		0.003
10.035	0.001		0		0.003
10.044	0.001		0		0.003
10.052	0.001		0		0.003
10.061	0.001		0		0.003
10.069	0.001		0		0.003
10.078	0.001		0		0.003
10.086	0.001		0		0.003
10.094	0.001		0		0.003
10.103	0.001		0		0.003
10.111	0.001		0		0.003
10.12	0.001		0		0.003
10.128	0.001		0		0.003
10.136	0.001		0		0.003
10.145	0.001		0		0.003
10.153	0.001		0		0.003
10.162	0.001		0		0.003
10.17	0.002		0		0.003
10.179	0.002		0		0.003
10.187	0.002		0		0.003
10.195	0.002		0		0.003
10.204	0.002		0		0.003
10.212	0.001		0		0.003
10.221	0.001		0		0.003
10.229	0.001		0		0.003
10.237	0.001		0		0.003
10.246	0.001		0		0.003
10.254	0.001		0		0.003
10.263	0.001		0		0.003
10.271	0.001		0		0.003
10.28	0.001		0		0.003
10.288	0.001		0		0.003
10.296	0.001		0		0.003
10.305	0.001		0		0.003
10.313	0.001		0		0.003
10.322	0.001		0		0.003
10.33	0.001		0		0.003
10.338	0.001		0		0.003
10.347	0.001		0		0.003
10.355	0.001		0		0.003
10.364	0.001		0		0.003
10.372	0.001		0		0.003
10.381	0.001		0		0.003
10.389	0.001		0		0.003
10.397	0.001		0		0.003
10.406	0.001		0		0.003
10.414	0.001		0		0.003
10.423	0.001		0		0.003
10.431	0.001		0		0.003
10.439	0.001		0		0.003
10.448	0.001		0		0.003
10.456	0.001		0		0.003
10.465	0.001		0		0.003
10.473	0.001		0		0.003
10.482	0.001		0		0.003
10.49	0.001		0		0.003
10.498	0.002		0		0.003
10.507	0.002		0		0.003
10.515	0.002		0		0.003
10.524	0.002		0		0.003
10.532	0.002		0		0.003
10.54	0.002		0		0.003
10.549	0.002		0		0.003
10.557	0.002		0		0.003
10.566	0.002		0		0.003
10.574	0.002		0		0.003
10.583	0.001		0		0.003
10.591	0.001		0		0.003
10.599	0.001		0		0.003
10.608	0.001		0		0.003
10.616	0.001		0		0.003
10.625	0.001		0		0.003
10.633	0.001		0		0.003
10.641	0.001		0		0.003
10.65	0.001		0		0.003
10.658	0.001		0		0.003
10.667	0.001		0		0.003
10.675	0.001		0		0.003
10.684	0.001		0		0.003
10.692	0.001		0		0.003
10.7	0.001		0		0.003
10.709	0.001		0		0.003
10.717	0.001		0		0.003
10.726	0.001		0		0.003
10.734	0.001		0		0.003
10.742	0.001		0		0.003
10.751	0.001		0		0.003
10.759	0.001		0		0.003
10.768	0.001		0		0.003
10.776	0.001		0		0.003
10.785	0.001		0		0.003
10.793	0.001		0		0.003
10.801	0.001		0		0.003
10.81	0.001		0		0.003
10.818	0.001		0		0.003
10.827	0.001		0		0.003
10.835	0.001		0		0.003
10.844	0.001		0		0.003
10.852	0.001		0		0.003
10.86	0.001		0		0.003
10.869	0.001		0		0.003
10.877	0.001		0		0.003
10.886	0.001		0		0.004
10.894	0.001		0		0.004
10.902	0.001		0		0.004
10.911	0.001		0		0.004
10.919	0.001		0		0.004
10.928	0.001		0		0.004
10.936	0.001		0.001		0.004
10.945	0.001		0.001		0.004
10.953	0.001		0.001		0.004
10.961	0.001		0.001		0.004
10.97	0.002		0.001		0.004
10.978	0.002		0.001		0.004
10.987	0.002		0.001		0.005
10.995	0.002		0.001		0.005
11.003	0.002		0.002		0.005
11.012	0.002		0.002		0.005
11.02	0.002		0.002		0.005
11.029	0.002		0.002		0.005
11.037	0.002		0.002		0.005
11.046	0.002		0.002		0.005
11.054	0.002		0.002		0.005
11.062	0.002		0.003		0.005
11.071	0.002		0.003		0.005
11.079	0.003		0.003		0.005
11.088	0.003		0.003		0.005
11.096	0.003		0.003		0.005
11.104	0.003		0.003		0.005
11.113	0.003		0.003		0.005
11.121	0.003		0.003		0.005
11.13	0.003		0.003		0.005
11.138	0.003		0.004		0.005
11.147	0.003		0.004		0.005
11.155	0.003		0.004		0.005
11.163	0.003		0.004		0.005
11.172	0.003		0.004		0.005
11.18	0.003		0.004		0.005
11.189	0.004		0.004		0.005
11.197	0.004		0.004		0.005
11.205	0.004		0.004		0.005
11.214	0.004		0.004		0.005
11.222	0.004		0.004		0.005
11.231	0.004		0.004		0.005
11.239	0.004		0.004		0.005
11.248	0.004		0.004		0.005
11.256	0.004		0.004		0.006
11.264	0.004		0.004		0.006
11.273	0.005		0.004		0.006
11.281	0.005		0.005		0.006
11.29	0.005		0.005		0.006
11.298	0.005		0.005		0.006
11.306	0.005		0.005		0.006
11.315	0.005		0.005		0.006
11.323	0.005		0.005		0.006
11.332	0.005		0.005		0.006
11.34	0.005		0.006		0.006
11.349	0.006		0.006		0.006
11.357	0.006		0.006		0.006
11.365	0.006		0.006		0.006
11.374	0.006		0.006		0.006
11.382	0.006		0.007		0.007
11.391	0.006		0.007		0.007
11.399	0.006		0.007		0.007
11.407	0.006		0.007		0.007
11.416	0.006		0.007		0.007
11.424	0.006		0.007		0.007
11.433	0.006		0.008		0.007
11.441	0.006		0.008		0.007
11.45	0.007		0.008		0.007
11.458	0.007		0.008		0.007
11.466	0.007		0.008		0.007
11.475	0.007		0.008		0.007
11.483	0.007		0.008		0.008
11.492	0.007		0.009		0.008
11.5	0.007		0.009		0.008
11.508	0.007		0.009		0.008
11.517	0.008		0.009		0.008
11.525	0.008		0.009		0.008
11.534	0.008		0.01		0.008
11.542	0.008		0.01		0.008
11.551	0.008		0.01		0.008
11.559	0.008		0.01		0.008
11.567	0.008		0.01		0.008
11.576	0.008		0.011		0.008
11.584	0.008		0.011		0.008
11.593	0.008		0.011		0.008
11.601	0.009		0.011		0.008
11.609	0.009		0.012		0.008
11.618	0.009		0.012		0.008
11.626	0.009		0.012		0.008
11.635	0.009		0.012		0.008
11.643	0.009		0.013		0.009
11.652	0.009		0.013		0.009
11.66	0.009		0.013		0.009
11.668	0.009		0.013		0.009
11.677	0.01		0.014		0.009
11.685	0.01		0.014		0.009
11.694	0.01		0.014		0.009
11.702	0.01		0.015		0.009
11.71	0.01		0.015		0.009
11.719	0.01		0.015		0.009
11.727	0.01		0.016		0.01
11.736	0.01		0.016		0.01
11.744	0.011		0.016		0.01
11.753	0.011		0.017		0.01
11.761	0.011		0.017		0.01
11.769	0.011		0.017		0.01
11.778	0.011		0.018		0.01
11.786	0.011		0.018		0.01
11.795	0.012		0.019		0.01
11.803	0.012		0.019		0.01
11.811	0.012		0.019		0.01
11.82	0.012		0.02		0.011
11.828	0.012		0.02		0.011
11.837	0.012		0.021		0.011
11.845	0.013		0.021		0.011
11.854	0.013		0.022		0.011
11.862	0.013		0.023		0.011
11.87	0.013		0.023		0.011
11.879	0.013		0.024		0.011
11.887	0.014		0.024		0.011
11.896	0.014		0.025		0.012
11.904	0.014		0.026		0.012
11.912	0.014		0.026		0.012
11.921	0.015		0.027		0.012
11.929	0.015		0.028		0.012
11.938	0.015		0.029		0.012
11.946	0.015		0.03		0.012
11.955	0.016		0.031		0.012
11.963	0.016		0.032		0.012
11.971	0.016		0.033		0.013
11.98	0.017		0.034		0.013
11.988	0.017		0.035		0.013
11.997	0.017		0.036		0.013
12.005	0.018		0.037		0.013
12.014	0.018		0.039		0.013
12.022	0.019		0.04		0.013
12.03	0.019		0.042		0.013
12.039	0.02		0.043		0.014
12.047	0.02		0.045		0.014
12.056	0.021		0.047		0.014
12.064	0.021		0.049		0.014
12.072	0.022		0.051		0.014
12.081	0.022		0.053		0.014
12.089	0.023		0.055		0.014
12.098	0.024		0.057		0.015
12.106	0.025		0.059		0.015
12.115	0.025		0.062		0.015
12.123	0.026		0.065		0.015
12.131	0.027		0.068		0.015
12.14	0.028		0.071		0.015
12.148	0.029		0.074		0.015
12.157	0.03		0.077		0.016
12.165	0.031		0.081		0.016
12.173	0.032		0.084		0.016
12.182	0.033		0.088		0.016
12.19	0.034		0.092		0.016
12.199	0.036		0.097		0.016
12.207	0.037		0.102		0.016
12.216	0.039		0.107		0.017
12.224	0.04		0.112		0.017
12.232	0.042		0.117		0.017
12.241	0.044		0.123		0.017
12.249	0.046		0.129		0.017
12.258	0.047		0.136		0.017
12.266	0.05		0.143		0.018
12.274	0.052		0.15		0.018
12.283	0.054		0.158		0.018
12.291	0.056		0.166		0.018
12.3	0.059		0.174		0.018
12.308	0.062		0.183		0.019
12.317	0.065		0.192		0.019
12.325	0.068		0.202		0.019
12.333	0.071		0.212		0.019
12.342	0.074		0.223		0.019
12.35	0.078		0.234		0.019
12.359	0.081		0.246		0.02
12.367	0.085		0.258		0.02
12.375	0.089		0.27		0.02
12.384	0.094		0.283		0.02
12.392	0.098		0.297		0.02
12.401	0.103		0.311		0.021
12.409	0.108		0.325		0.021
12.418	0.113		0.339		0.021
12.426	0.119		0.354		0.021
12.434	0.125		0.37		0.022
12.443	0.131		0.385		0.022
12.451	0.137		0.401		0.022
12.46	0.144		0.418		0.022
12.468	0.151		0.434		0.022
12.476	0.158		0.451		0.023
12.485	0.166		0.468		0.023
12.493	0.173		0.485		0.023
12.502	0.182		0.502		0.023
12.51	0.19		0.519		0.024
12.519	0.199		0.536		0.024
12.527	0.208		0.553		0.024
12.535	0.218		0.571		0.024
12.544	0.228		0.588		0.025
12.552	0.238		0.605		0.025
12.561	0.249		0.621		0.025
12.569	0.26		0.638		0.025
12.577	0.272		0.654		0.026
12.586	0.283		0.671		0.026
12.594	0.295		0.686		0.026
12.603	0.308		0.702		0.027
12.611	0.321		0.717		0.027
12.62	0.334		0.732		0.027
12.628	0.348		0.747		0.027
12.636	0.361		0.761	93420.2	0.028
12.645	0.376		0.775	93370.7	0.028
12.653	0.39		0.788	93414.3	0.028
12.662	0.405		0.801	93254.5	0.029
12.67	0.42		0.814	93095.6	0.029
12.678	0.435		0.826	92999.7	0.029
12.687	0.451		0.838	92804.4	0.03
12.695	0.467		0.849	92777.7	0.03
12.704	0.483		0.86	92670.6	0.03
12.712	0.499		0.87	92487.2	0.031
12.721	0.515		0.88	92423	0.031
12.729	0.531		0.889	92323.9	0.031
12.737	0.548		0.898	92111.3	0.032
12.746	0.565		0.906	91880.2	0.032
12.754	0.581		0.914	91643.1	0.032
12.763	0.598		0.922	91451.4	0.033
12.771	0.615		0.929	91210.1	0.033
12.779	0.632		0.936	90904.2	0.033
12.788	0.648		0.942	90551.7	0.034
12.796	0.665		0.948	90222.8	0.034
12.805	0.681		0.954	89972.5	0.034
12.813	0.697		0.959	89736.9	0.035
12.822	0.714		0.963	89495.1	0.035
12.83	0.729		0.968	89248.9	0.036
12.838	0.745		0.972	88974.3	0.036
12.847	0.76		0.976	88721.8	0.036
12.855	0.775		0.979	88476.2	0.037
12.864	0.79	94875.2	0.982	88187.3	0.037
12.872	0.805	95402.8	0.985	87828.5	0.038
12.88	0.819	95891	0.987	87527.1	0.038
12.889	0.832	96157.6	0.99	87263.6	0.038
12.897	0.845	96163	0.992	87018.7	0.039
12.906	0.858	95879.6	0.993	86728.4	0.039
12.914	0.87	95324.2	0.995	86397.2	0.04
12.923	0.882	94992.9	0.996	86112.8	0.04
12.931	0.893	95515.1	0.997	85858.8	0.04
12.939	0.904	95862.1	0.998	85638.8	0.041
12.948	0.914	95966.3	0.999	85455.8	0.041
12.956	0.924	95873.2	0.999	85123.1	0.042
12.965	0.933	95793.5	1	84797.8	0.042
12.973	0.942	95816.7	1	84489.4	0.043
12.981	0.95	95842.6	1	84139.9	0.043
12.99	0.957	95873	1	83829.4	0.043
12.998	0.964	95973.6	1	83659.1	0.044
13.007	0.97	96168.7	0.999	83615.5	0.044
13.015	0.976	96384.1	0.999	83546.8	0.045
13.024	0.981	96616.6	0.998	83444.9	0.045
13.032	0.985	96776.6	0.998	83097.5	0.046
13.04	0.989	96849.4	0.997	82803.9	0.046
13.049	0.992	96804	0.996	82550.1	0.047
13.057	0.995	96785.1	0.995	82200	0.047
13.066	0.997	96886.1	0.994	81844.8	0.048
13.074	0.999	96835.2	0.993	81518.9	0.048
13.082	1	96601.1	0.992	81229.3	0.049
13.091	1	96271.8	0.991	80973.5	0.049
13.099	1	96043	0.99	80740.2	0.05
13.108	0.999	96002.8	0.989	80487.9	0.05
13.116	0.998	96137.4	0.987	80147.6	0.051
13.125	0.996	96329.9	0.986	79885.8	0.051
13.133	0.994	96554.7	0.985	79677.6	0.052
13.141	0.991	96603.3	0.983	79457.2	0.052
13.15	0.988	96761.9	0.982	79214.6	0.053
13.158	0.985	96972	0.98	78865.1	0.054
13.167	0.98	97103.4	0.979	78533.1	0.054
13.175	0.976	97177.7	0.977	78232.8	0.055
13.184	0.971	97235.1	0.976	77852.8	0.055
13.192	0.966	97390.5	0.974	77592	0.056
13.2	0.96	97313.2	0.973	77374.5	0.056
13.209	0.954	97359.2	0.971	77188.9	0.057
13.217	0.948	97505.4	0.969	76950.9	0.058
13.226	0.941	97300.5	0.968	76761.3	0.058
13.234	0.934	96740.8	0.966	76581.7	0.059
13.242	0.926	96162.1	0.964	76409.2	0.06
13.251	0.919	95903.6	0.962	76197.5	0.06
13.259	0.911		0.961	76039.9	0.061
13.268	0.902		0.959	75900.6	0.061
13.276	0.894		0.957	75766.7	0.062
13.285	0.885		0.955	75658.3	0.063
13.293	0.876		0.953	75539	0.063
13.301	0.867		0.952	75332	0.064
13.31	0.858		0.95	75084.6	0.065
13.318	0.849		0.948	74773.3	0.066
13.327	0.839		0.946	74506.5	0.066
13.335	0.829		0.944	74320.9	0.067
13.343	0.82		0.942	74172.1	0.068
13.352	0.81		0.94	73935.1	0.069
13.36	0.8		0.938	73756.2	0.069
13.369	0.79		0.936	73652.3	0.07
13.377	0.779		0.934	73521.9	0.071
13.386	0.769		0.931	73345.8	0.072
13.394	0.759		0.929	73199.8	0.072
13.402	0.749		0.927	73102.3	0.073
13.411	0.738		0.925	73016.4	0.074
13.419	0.728		0.923	72883.4	0.075
13.428	0.717		0.92	72732.9	0.076
13.436	0.707		0.918	72440.1	0.077
13.444	0.697		0.916	72135.1	0.078
13.453	0.686		0.913	71915.5	0.078
13.461	0.676		0.911	71713.2	0.079
13.47	0.666		0.908	71500.8	0.08
13.478	0.656		0.906	71288.5	0.081
13.487	0.646		0.903	71109.2	0.082
13.495	0.636		0.9	71025.6	0.083
13.503	0.626		0.898	70955.4	0.084
13.512	0.616		0.895	70878	0.085
13.52	0.606		0.892	70835.9	0.086
13.529	0.596		0.89	70760.9	0.087
13.537	0.587		0.887	70699.1	0.088
13.545	0.577		0.884	70564	0.089
13.554	0.568		0.881	70392.4	0.09
13.562	0.558		0.878	70272.1	0.091
13.571	0.549		0.875	70225.1	0.092
13.579	0.54		0.872	70154.9	0.094
13.588	0.531		0.869	70096.5	0.095
13.596	0.522		0.866	70043.4	0.096
13.604	0.514		0.863	69936.5	0.097
13.613	0.505		0.86	69759.8	0.098
13.621	0.497		0.857	69621.6	0.099
13.63	0.488		0.853	69475.2	0.1
13.638	0.48		0.85	69228	0.101
13.646	0.472		0.847	69073.8	0.103
13.655	0.464		0.843	68991.7	0.104
13.663	0.456		0.84	68869.6	0.105
13.672	0.449		0.837	68765.3	0.106
13.68	0.441		0.833	68684.6	0.107
13.689	0.434		0.83	68435	0.109
13.697	0.426		0.826	68113.2	0.11
13.705	0.419		0.822	67923.2	0.111
13.714	0.412		0.819	67869.4	0.112
13.722	0.405		0.815	67868.7	0.113
13.731	0.399		0.811	67932.9	0.115
13.739	0.392		0.808	67895.9	0.116
13.747	0.386		0.804	67789.3	0.117
13.756	0.379		0.8	67681.4	0.118
13.764	0.373		0.796	67500.2	0.119
13.773	0.367		0.793	67299	0.121
13.781	0.361		0.789	67069.2	0.122
13.79	0.355		0.785	66855.9	0.123
13.798	0.349		0.781	66729.8	0.124
13.806	0.344		0.777	66677.2	0.125
13.815	0.338		0.773	66559.6	0.127
13.823	0.333		0.769	66441.7	0.128
13.832	0.328		0.765	66333.4	0.129
13.84	0.323		0.761	66060.9	0.13
13.848	0.317		0.757	65836.4	0.131
13.857	0.313		0.753	65716.3	0.132
13.865	0.308		0.749	65623.7	0.134
13.874	0.303		0.745	65399.1	0.135
13.882	0.298		0.741	65172.1	0.136
13.891	0.294		0.736	65010	0.137
13.899	0.289		0.732	64901.6	0.138
13.907	0.285		0.728	64766.4	0.139
13.916	0.281		0.724	64569.9	0.14
13.924	0.276		0.72	64412.1	0.142
13.933	0.272		0.716	64309.6	0.143
13.941	0.268		0.711	64197.1	0.144
13.949	0.264		0.707	64109.7	0.145
13.958	0.26		0.703	64010.7	0.146
13.966	0.257		0.699	63959.1	0.147
13.975	0.253		0.695	63962	0.148
13.983	0.249		0.69	63941.8	0.149
13.992	0.246		0.686	63790.9	0.15
14	0.242		0.682	63643.2	0.151
14.008	0.239		0.678	63446.4	0.152
14.017	0.236		0.673	63249.8	0.153
14.025	0.232		0.669	63126.3	0.154
14.034	0.229		0.665	62952.5	0.155
14.042	0.226		0.661	62680.4	0.156
14.05	0.223		0.657	62422.6	0.157
14.059	0.22		0.652	62288.5	0.159
14.067	0.217		0.648	62249.6	0.16
14.076	0.214		0.644	62205.9	0.161
14.084	0.211		0.64	62113.6	0.162
14.093	0.208		0.636	62044.9	0.163
14.101	0.206		0.632	61878.1	0.164
14.109	0.203		0.627	61789.8	0.165
14.118	0.2		0.623	61758	0.166
14.126	0.198		0.619	61651.8	0.167
14.135	0.195		0.615	61501.5	0.168
14.143	0.193		0.611	61314.7	0.169
14.151	0.19		0.607	61137.4	0.17
14.16	0.188		0.603	60986	0.171
14.168	0.185		0.599	60761.8	0.172
14.177	0.183		0.595	60556.5	0.173
14.185	0.181		0.59	60357.1	0.174
14.194	0.178		0.586	60255.9	0.175
14.202	0.176		0.582	60247.6	0.176
14.21	0.174		0.578	60327	0.177
14.219	0.172		0.574	60355.1	0.178
14.227	0.17		0.57	60223.5	0.18
14.236	0.168		0.566	60081.3	0.181
14.244	0.166		0.562	60104.3	0.182
14.253	0.164		0.558	60163.3	0.183
14.261	0.162		0.555	60201.2	0.184
14.269	0.16		0.551	59901.5	0.186
14.278	0.158		0.547	59673.1	0.187
14.286	0.156		0.543	59346.7	0.188
14.295	0.154		0.539	58922.6	0.189
14.303	0.153		0.535	58679.3	0.191
14.311	0.151		0.531	58595.8	0.192
14.32	0.149		0.527	58587.5	0.194
14.328	0.148		0.524	58607.9	0.195
14.337	0.146		0.52	58458.6	0.196
14.345	0.144		0.516	58098.7	0.198
14.354	0.143		0.512	57844.8	0.199
14.362	0.141		0.509	57689.4	0.201
14.37	0.14		0.505	57659.4	0.203
14.379	0.138		0.501	57491.4	0.204
14.387	0.137		0.497	57184.2	0.206
14.396	0.135		0.494	56981.5	0.208
14.404	0.134		0.49	56852.3	0.209
14.412	0.133		0.486	56704.8	0.211
14.421	0.131		0.483	56543.6	0.213
14.429	0.13		0.479	56388.9	0.215
14.438	0.129		0.475	56187.6	0.217
14.446	0.127		0.472	55987.5	0.219
14.455	0.126		0.468	55848.1	0.221
14.463	0.125		0.465	55782.7	0.223
14.471	0.124		0.461	55620.4	0.225
14.48	0.123		0.458	55414.9	0.228
14.488	0.122		0.454	55274.5	0.23
14.497	0.121		0.451	55133.9	0.232
14.505	0.119		0.447	55040	0.235
14.513	0.118		0.444	54991.8	0.238
14.522	0.117		0.44	54938.5	0.24
14.53	0.116		0.437	54879.7	0.243
14.539	0.115		0.433	54739.6	0.246
14.547	0.115		0.43	54617.2	0.249
14.556	0.114		0.427	54484.3	0.251
14.564	0.113		0.423	54202.9	0.255
14.572	0.112		0.42	53790.9	0.258
14.581	0.111		0.416	53490.8	0.261
14.589	0.11		0.413	53263.7	0.264
14.598	0.109		0.41	53140.2	0.268
14.606	0.109		0.406	52942.9	0.271
14.614	0.108		0.403	52623.9	0.275
14.623	0.107		0.4	52240	0.279
14.631	0.106		0.397	51874.2	0.282
14.64	0.106		0.393	51720.9	0.286
14.648	0.105		0.39	51646	0.291
14.657	0.104		0.387	51580.6	0.295
14.665	0.104		0.384	51433.1	0.299
14.673	0.103		0.38	51380.4	0.304
14.682	0.102		0.377	51303.5	0.308
14.69	0.102		0.374	51218	0.313
14.699	0.101		0.371	51145.8	0.318
14.707	0.101		0.367	51014.3	0.323
14.715	0.1		0.364		0.328
14.724	0.1		0.361		0.333
14.732	0.099		0.358		0.339
14.741	0.099		0.355		0.345
14.749	0.098		0.351		0.35
14.758	0.098		0.348		0.356
14.766	0.097		0.345		0.362
14.774	0.097		0.342		0.369
14.783	0.096		0.339		0.375
14.791	0.096		0.336		0.382
14.8	0.096		0.332		0.389
14.808	0.095		0.329		0.396
14.816	0.095		0.326		0.403
14.825	0.094		0.323		0.41
14.833	0.094		0.32		0.418
14.842	0.094		0.316		0.425
14.85	0.093		0.313		0.433
14.859	0.093		0.31		0.441
14.867	0.092		0.307		0.449
14.875	0.092		0.303		0.458
14.884	0.092		0.3		0.466
14.892	0.091		0.297		0.475
14.901	0.091		0.294		0.484
14.909	0.091		0.291		0.493
14.917	0.09		0.287		0.502
14.926	0.09		0.284		0.512
14.934	0.09		0.281		0.521
14.943	0.089		0.277		0.531
14.951	0.089		0.274		0.541
14.96	0.089		0.271		0.551
14.968	0.088		0.268		0.561
14.976	0.088		0.264		0.571
14.985	0.087		0.261		0.582
14.993	0.087		0.258		0.592
15.002	0.087		0.254		0.603
15.01	0.086		0.251		0.613
15.018	0.086		0.248		0.624
15.027	0.085		0.244		0.635
15.035	0.085		0.241		0.646
15.044	0.084		0.238		0.657
15.052	0.084		0.235		0.668
15.061	0.084		0.231		0.679
15.069	0.083		0.228		0.69
15.077	0.083		0.225		0.701
15.086	0.082		0.221		0.712
15.094	0.082		0.218		0.723
15.103	0.081		0.215		0.733
15.111	0.08		0.212		0.744
15.119	0.08		0.208		0.755
15.128	0.079		0.205		0.766
15.136	0.079		0.202		0.776
15.145	0.078		0.199		0.787
15.153	0.078		0.196		0.797
15.162	0.077		0.193		0.807
15.17	0.076		0.189		0.817
15.178	0.076		0.186		0.827
15.187	0.075		0.183		0.837
15.195	0.075		0.18		0.846
15.204	0.074		0.177		0.856
15.212	0.073		0.174		0.865
15.22	0.073		0.171		0.874
15.229	0.072		0.169		0.882
15.237	0.071		0.166		0.891
15.246	0.071		0.163		0.899
15.254	0.07		0.16		0.907
15.263	0.069		0.157		0.914	33304.1
15.271	0.069		0.155		0.921	33326.9
15.279	0.068		0.152		0.928	33323.7
15.288	0.067		0.149		0.935	33278.4
15.296	0.067		0.147		0.941	33207.4
15.305	0.066		0.144		0.948	33105.6
15.313	0.065		0.142		0.953	32980.7
15.321	0.064		0.139		0.959	32828.7
15.33	0.064		0.137		0.964	32710.7
15.338	0.063		0.135		0.969	32598.5
15.347	0.062		0.132		0.973	32492.1
15.355	0.062		0.13		0.977	32444.8
15.364	0.061		0.128		0.981	32413.8
15.372	0.06		0.125		0.984	32334.2
15.38	0.06		0.123		0.987	32228.3
15.389	0.059		0.121		0.99	32146.6
15.397	0.058		0.119		0.993	32120.1
15.406	0.058		0.117		0.995	32139.2
15.414	0.057		0.115		0.996	32163.6
15.423	0.056		0.113		0.998	32179.8
15.431	0.056		0.111		0.999	32182.7
15.439	0.055		0.109		1	32161.4
15.448	0.054		0.107		1	32089.1
15.456	0.054		0.106		1	31940.6
15.465	0.053		0.104		1	31833.8
15.473	0.052		0.102		0.999	31758.4
15.481	0.052		0.1		0.998	31697.7
15.49	0.051		0.099		0.997	31595.5
15.498	0.051		0.097		0.996	31492.5
15.507	0.05		0.096		0.994	31410.7
15.515	0.049		0.094		0.992	31341.2
15.524	0.049		0.092		0.99	31251.5
15.532	0.048		0.091		0.987	31124.8
15.54	0.047		0.089		0.984	30955.9
15.549	0.047		0.088		0.981	30847.3
15.557	0.046		0.087		0.978	30785.6
15.566	0.046		0.085		0.974	30745.5
15.574	0.045		0.084		0.97	30696.3
15.582	0.045		0.083		0.966	30628.2
15.591	0.044		0.081		0.962	30597.4
15.599	0.043		0.08		0.957	30598.9
15.608	0.043		0.079		0.952	30638.5
15.616	0.042		0.078		0.948	30627.4
15.625	0.042		0.076		0.942	30532
15.633	0.041		0.075		0.937	30445.9
15.641	0.041		0.074		0.932	30373.5
15.65	0.04		0.073		0.926	30230.8
15.658	0.04		0.072		0.92
15.667	0.039		0.071		0.914
15.675	0.039		0.07		0.908
15.683	0.038		0.069		0.902
15.692	0.038		0.068		0.895
15.7	0.037		0.067		0.889
15.709	0.037		0.066		0.882
15.717	0.036		0.065		0.875
15.726	0.036		0.064		0.868
15.734	0.035		0.063		0.861
15.742	0.035		0.062		0.854
15.751	0.034		0.061		0.847
15.759	0.034		0.06		0.84
15.768	0.033		0.059		0.833
15.776	0.033		0.058		0.825
15.784	0.033		0.057		0.818
15.793	0.032		0.056		0.81
15.801	0.032		0.056		0.803
15.81	0.031		0.055		0.795
15.818	0.031		0.054		0.787
15.827	0.03		0.053		0.78
15.835	0.03		0.052		0.772
15.843	0.03		0.052		0.764
15.852	0.029		0.051		0.756
15.86	0.029		0.05		0.749
15.869	0.028		0.049		0.741
15.877	0.028		0.049		0.733
15.885	0.028		0.048		0.725
15.894	0.027		0.047		0.717
15.902	0.027		0.047		0.709
15.911	0.026		0.046		0.701
15.919	0.026		0.045		0.693
15.928	0.026		0.045		0.686
15.936	0.025		0.044		0.678
15.944	0.025		0.043		0.67
15.953	0.025		0.043		0.662
15.961	0.024		0.042		0.654
15.97	0.024		0.042		0.646
15.978	0.023		0.041		0.639
15.986	0.023		0.04		0.631
15.995	0.023		0.04		0.623
16.003	0.022		0.039		0.615
16.012	0.022		0.039		0.607
16.02	0.022		0.038		0.6
16.029	0.021		0.038		0.592
16.037	0.021		0.037		0.584
16.045	0.021		0.037		0.577
16.054	0.02		0.036		0.569
16.062	0.02		0.036		0.562
16.071	0.02		0.035		0.554
16.079	0.019		0.035		0.547
16.087	0.019		0.034		0.539
16.096	0.019		0.034		0.532
16.104	0.018		0.033		0.525
16.113	0.018		0.033		0.517
16.121	0.018		0.032		0.51
16.13	0.017		0.032		0.503
16.138	0.017		0.031		0.496
16.146	0.017		0.031		0.489
16.155	0.017		0.031		0.482
16.163	0.016		0.03		0.475
16.172	0.016		0.03		0.468
16.18	0.016		0.029		0.461
16.188	0.016		0.029		0.454
16.197	0.015		0.028		0.447
16.205	0.015		0.028		0.441
16.214	0.015		0.028		0.434
16.222	0.015		0.027		0.427
16.231	0.014		0.027		0.421
16.239	0.014		0.027		0.414
16.247	0.014		0.026		0.408
16.256	0.014		0.026		0.401
16.264	0.013		0.026		0.395
16.273	0.013		0.025		0.389
16.281	0.013		0.025		0.383
16.289	0.013		0.025		0.377
16.298	0.013		0.024		0.371
16.306	0.012		0.024		0.365
16.315	0.012		0.024		0.359
16.323	0.012		0.023		0.353
16.332	0.012		0.023		0.347
16.34	0.012		0.023		0.342
16.348	0.011		0.022		0.336
16.357	0.011		0.022		0.33
16.365	0.011		0.022		0.325
16.374	0.011		0.021		0.319
16.382	0.011		0.021		0.314
16.39	0.01		0.021		0.309
16.399	0.01		0.02		0.304
16.407	0.01		0.02		0.298
16.416	0.01		0.02		0.293
16.424	0.01		0.02		0.288
16.433	0.009		0.019		0.283
16.441	0.009		0.019		0.278
16.449	0.009		0.019		0.274
16.458	0.009		0.019		0.269
16.466	0.009		0.018		0.264
16.475	0.009		0.018		0.26
16.483	0.008		0.018		0.255
16.491	0.008		0.018		0.251
16.5	0.008		0.018		0.246
16.508	0.008		0.017		0.242
16.517	0.008		0.017		0.238
16.525	0.008		0.017		0.234
16.534	0.008		0.017		0.23
16.542	0.008		0.017		0.225
16.55	0.007		0.016		0.222
16.559	0.007		0.016		0.218
16.567	0.007		0.016		0.214
16.576	0.007		0.016		0.21
16.584	0.007		0.016		0.206
16.593	0.007		0.015		0.203
16.601	0.007		0.015		0.199
16.609	0.007		0.015		0.196
16.618	0.007		0.015		0.192
16.626	0.007		0.014		0.189
16.635	0.006		0.014		0.185
16.643	0.006		0.014		0.182
16.651	0.006		0.014		0.179
16.66	0.006		0.014		0.176
16.668	0.006		0.013		0.173
16.677	0.006		0.013		0.17
16.685	0.006		0.013		0.167
16.694	0.005		0.013		0.164
16.702	0.005		0.013		0.161
16.71	0.005		0.012		0.158
16.719	0.005		0.012		0.155
16.727	0.005		0.012		0.152
16.736	0.005		0.012		0.15
16.744	0.005		0.012		0.147
16.752	0.005		0.012		0.144
16.761	0.005		0.012		0.142
16.769	0.004		0.012		0.139
16.778	0.004		0.011		0.137
16.786	0.004		0.011		0.135
16.795	0.004		0.011		0.132
16.803	0.004		0.011		0.13
16.811	0.004		0.011		0.128
16.82	0.004		0.011		0.125
[truncated: 851 more rows]

## Sheet: table
		monomer (kDa)	oligomer (kDa)	multiple	oligomer
	WT	17.4	96.4	x5.5	hexamer
	CTD 2Q left	17.4	77.8	x4.5	mixed
	CTDall	17.4	31.8	x1.8	dimer
