# Supplementary material for: Dissecting the phase separation and oligomerization activities of the carboxysome positioning protein McdB
Source: eLife journal article supplement (doi:10.7554/elife.81362), 2023-09-05
Supplement: supp [file Figure 6-figure supplement 1-source data 1.xlsx]

## Sheet: Sheet1
Wavelength	2Q left	2Q middle	2Q right	3Q left	3Q right	All	WT
260	-0.015086	-0.15988	0.073024	-0.411962	0.171817	-0.93361	-0.550346
259.9	-0.003209	-0.209856	0.112366	-0.42539	0.177378	-0.982594	-0.630534
259.8	0.024374	-0.309116	0.029193	-0.422401	0.189709	-1.14889	-0.693887
259.7	-0.058906	-0.339773	0.02401	-0.395056	0.138944	-1.12311	-0.710957
259.6	0.036489	-0.388183	0.172	-0.189559	0.187787	-1.33158	-0.709085
259.5	0.009813	-0.343161	0.119903	-0.236877	0.101835	-1.39166	-0.709781
259.4	0.077903	-0.252726	0.091067	-0.130063	0.105808	-1.09259	-0.559293
259.3	0.136434	-0.197653	-0.021375	-0.320086	0.045151	-1.05826	-0.550634
259.2	0.108425	-0.160144	-0.069416	-0.315239	0.011944	-0.893386	-0.492268
259.1	0.118105	-0.125335	-0.078464	-0.305372	-0.033851	-0.794805	-0.388459
259	0.073799	-0.149194	-0.100533	-0.29052	-0.010238	-0.643268	-0.292456
258.9	0.154174	-0.044858	-0.014931	-0.222965	-0.000431	-0.555391	-0.243975
258.8	0.12006	-0.05127	-0.005646	-0.262716	0.032395	-0.40335	-0.11166
258.7	0.106159	-0.125519	-0.134082	-0.399324	-0.071316	-0.411385	-0.130379
258.6	0.0352	-0.30094	-0.099846	-0.524683	-0.056821	-0.47385	-0.21181
258.5	-0.033439	-0.320911	-0.125961	-0.318441	-0.021221	-0.509193	-0.230051
258.4	0.04386	-0.341285	-0.05161	-0.309659	-0.049073	-0.440555	-0.272135
258.3	0.081865	-0.322297	-0.073021	-0.269886	0.021354	-0.568501	-0.310327
258.2	0.068277	-0.310384	-0.055253	-0.242333	-0.062178	-0.73112	-0.366334
258.1	-0.035329	-0.331304	-0.140081	-0.364366	-0.183109	-0.728764	-0.389384
258	-0.043865	-0.441591	-0.199187	-0.384089	-0.194172	-0.766019	-0.488751
257.9	-0.007025	-0.403158	-0.12888	-0.302852	-0.138626	-0.696518	-0.534008
257.8	-0.034203	-0.304903	-0.046672	-0.203436	-0.135694	-0.644913	-0.441423
257.7	0.034549	-0.199053	-0.054469	-0.298596	-0.193371	-0.625609	-0.352021
257.6	0.04681	-0.100676	-0.064149	-0.370291	-0.131869	-0.539113	-0.287469
257.5	0.08493	-0.178258	-0.017172	-0.320043	-0.193204	-0.587791	-0.348619
257.4	0.016989	-0.240033	-0.093496	-0.312446	-0.195306	-0.489381	-0.374403
257.3	0.067413	-0.171261	-0.03813	-0.216855	-0.102099	-0.481787	-0.373101
257.2	0.011712	-0.179728	-0.005349	-0.202302	-0.081413	-0.441727	-0.246453
257.1	-0.034862	-0.144455	-0.021106	-0.2823	-0.096838	-0.37517	-0.214576
257	-0.01605	-0.176908	0.096747	-0.247401	-0.069447	-0.44428	-0.254458
256.9	0.028847	-0.227923	0.104304	-0.224843	0.026657	-0.446877	-0.405019
256.8	-0.032282	-0.118481	0.156015	-0.201365	0.016949	-0.279987	-0.327053
256.7	0.012308	-0.176009	0.2318	-0.087757	0.027398	-0.375101	-0.348355
256.6	0.087248	-0.214786	0.217132	-0.014904	0.139736	-0.323332	-0.29289
256.5	0.061902	-0.146458	0.26676	-0.010478	0.161326	-0.197297	-0.318943
256.4	0.019614	-0.070934	0.186436	-0.083851	0.107382	-0.120589	-0.276075
256.3	-0.028261	-0.129202	0.185159	-0.144609	0.026962	-0.205011	-0.368621
256.2	-7.8e-05	-0.187284	0.182846	-0.064762	0.111873	-0.361012	-0.496516
256.1	-0.032894	-0.073898	0.102497	-0.121987	0.004822	-0.375607	-0.398633
256	-0.030757	-0.144152	0.08451	-0.11592	-0.01292	-0.312162	-0.42575
255.9	-0.073973	-0.156354	-0.029855	-0.204344	-0.077768	-0.644788	-0.450728
255.8	-0.083521	0.002509	0.028085	-0.20371	-0.12014	-0.569027	-0.345149
255.7	-0.044286	-0.074162	0.036322	-0.308817	-0.150648	-0.608141	-0.426131
255.6	0.004077	-0.107519	0.078662	-0.238002	-0.118609	-0.631715	-0.406865
255.5	0.002709	0.029751	0.025909	-0.123487	-0.081975	-0.458314	-0.25175
255.4	0.038352	0.000152	0.027506	-0.151051	-0.078724	-0.547317	-0.156627
255.3	-0.043994	-0.075135	-0.028256	-0.184012	-0.013417	-0.674734	-0.228592
255.2	0.037668	-0.125297	-0.033298	-0.156276	0.00358	-0.724821	-0.207867
255.1	-0.008452	-0.140003	0.010676	-0.154278	0.05001	-0.682411	-0.194613
255	-0.04671	-0.156742	0.037722	-0.26155	0.072222	-0.751462	-0.281432
254.9	-0.087118	-0.268885	-0.020901	-0.281758	0.0092	-0.980681	-0.341945
254.8	-0.087457	-0.220407	0.080397	-0.24329	-0.004834	-0.875823	-0.271997
254.7	-0.000258	-0.26102	0.159963	-0.286206	0.035452	-0.878688	-0.2943
254.6	0.013972	-0.192408	0.15421	-0.35307	0.064864	-0.646264	-0.241558
254.5	0.165562	-0.274997	0.225744	-0.29214	0.091218	-0.704067	-0.292747
254.4	0.035299	-0.177075	0.112563	-0.33974	0.030888	-0.497785	-0.366025
254.3	-0.017394	-0.149963	0.070384	-0.414142	-0.011796	-0.353389	-0.298843
254.2	-0.074335	-0.245429	-0.033292	-0.39272	-0.093736	-0.391369	-0.242539
254.1	-0.042405	-0.240732	-0.088866	-0.337531	-0.095826	-0.327388	-0.219852
254	-0.038111	-0.275697	-0.199825	-0.351322	-0.032554	-0.190969	-0.209537
253.9	-0.040028	-0.295283	-0.240552	-0.267006	0.020416	-0.178181	-0.393313
253.8	-0.03549	-0.271461	-0.25955	-0.235738	0.016717	-0.205567	-0.410771
253.7	-0.088856	-0.30944	-0.342274	-0.213543	-0.036942	-0.34165	-0.48787
253.6	-0.053317	-0.428173	-0.252896	-0.177591	-0.039707	-0.577371	-0.527873
253.5	0.107936	-0.40176	-0.11482	-0.061698	0.090564	-0.675898	-0.54429
253.4	0.123285	-0.290239	-0.040102	-0.064331	0.145067	-0.557259	-0.400709
253.3	0.181948	-0.232171	0.116594	-0.09286	0.235303	-0.636107	-0.424121
253.2	0.092807	-0.200959	0.135173	-0.216604	0.223509	-0.714299	-0.445219
253.1	0.01667	-0.279924	0.104271	-0.351398	0.115506	-0.76144	-0.413464
253	-0.036137	-0.196337	0.139105	-0.368755	0.004482	-0.481843	-0.281807
252.9	-0.052397	-0.174397	0.181847	-0.350024	0.078277	-0.261295	-0.320807
252.8	-0.043663	-0.052576	0.197051	-0.39281	0.102099	-0.00955	-0.281826
252.7	-0.176036	-0.04	0.133401	-0.461828	0.044415	0.027596	-0.17886
252.6	-0.146392	-0.03117	0.198728	-0.366623	0.033565	-0.081156	-0.21163
252.5	-0.133099	-0.0286	0.174367	-0.369759	0.045126	-0.040036	-0.21887
252.4	-0.051431	0.04963	0.139496	-0.351871	0.014649	-0.022248	-0.24189
252.3	-0.004495	0.026217	0.129877	-0.314594	-0.022535	-0.078818	-0.27229
252.2	-0.004652	-0.01375	0.083501	-0.39787	0.059199	-0.091116	-0.32868
252.1	0.073293	0.017108	0.170641	-0.470745	0.071822	-0.190354	-0.27612
252	0.150687	-0.03188	0.201671	-0.479557	0.087165	-0.213596	-0.1929
251.9	0.141102	-0.01066	0.173158	-0.436008	0.002777	-0.250018	-0.30031
251.8	0.109582	0.02888	0.067968	-0.52648	-0.116559	-0.053835	-0.339619
251.7	0.027022	-0.047572	-0.022547	-0.556476	-0.18732	-0.013456	-0.388904
251.6	-0.013447	-0.023221	0.008644	-0.605507	-0.256793	0.097154	-0.38748
251.5	0.002672	-0.031035	0.035839	-0.568378	-0.187527	-0.154973	-0.305665
251.4	0.031757	-0.061792	0.144206	-0.459347	-0.12102	-0.351433	-0.352275
251.3	-0.121862	-0.206335	0.083597	-0.491055	-0.216816	-0.451403	-0.480483
251.2	-0.048434	-0.17133	0.084159	-0.418149	-0.21857	-0.469704	-0.533748
251.1	-0.01104	-0.162227	0.145298	-0.381144	-0.182814	-0.437226	-0.51994
251	-0.034735	-0.062424	0.168033	-0.370027	-0.078746	-0.350718	-0.472368
250.9	-0.012836	-0.288875	0.256682	-0.376101	-0.050293	-0.485481	-0.552745
250.8	0.098515	-0.291777	0.309091	-0.28429	0.024747	-0.619261	-0.414677
250.7	0.105834	-0.286196	0.334824	-0.178539	0.015636	-0.528124	-0.469266
250.6	0.089666	-0.398358	0.199197	-0.26211	-0.042479	-0.501992	-0.616958
250.5	0.173576	-0.372071	0.280108	-0.133408	0.043544	-0.529325	-0.608601
250.4	0.127703	-0.391073	0.270488	-0.086969	0.046697	-0.498825	-0.524773
250.3	0.057337	-0.50551	0.249292	-0.012718	0.032845	-0.626748	-0.64967
250.2	0.074335	-0.482474	0.265981	0.02146	0.028506	-0.606518	-0.623044
250.1	0.0622	-0.556505	0.197707	0.02179	0.010825	-0.646875	-0.673565
250	-0.034519	-0.560437	0.060953	-0.198841	-0.060254	-0.702803	-0.756857
249.9	-0.071797	-0.464496	0.057472	-0.205165	-0.038607	-0.564762	-0.717836
249.8	-0.048528	-0.520357	0.060543	-0.274476	-0.031029	-0.547103	-0.749887
249.7	-0.235823	-0.42778	-0.031605	-0.392392	-0.052753	-0.44624	-0.73882
249.6	-0.195949	-0.425186	-0.115248	-0.408493	-0.032463	-0.427258	-0.754916
249.5	-0.174288	-0.312556	-0.163933	-0.519803	-0.075348	-0.5137	-0.619816
249.4	-0.161815	-0.455004	-0.19964	-0.567038	0.014715	-0.627742	-0.660274
249.3	-0.17067	-0.336486	-0.210953	-0.634126	-0.059685	-0.610698	-0.589656
249.2	-0.199339	-0.337527	-0.116837	-0.532978	-0.067046	-0.719559	-0.592107
249.1	-0.130472	-0.370021	-0.081422	-0.458737	-0.082396	-0.613643	-0.541461
249	-0.167181	-0.33764	-0.041183	-0.42238	-0.089765	-0.67481	-0.41906
248.9	-0.298909	-0.400923	-0.256382	-0.52014	-0.292893	-0.635567	-0.401423
248.8	-0.322451	-0.451022	-0.294146	-0.543629	-0.334674	-0.759008	-0.456112
248.7	-0.375961	-0.406044	-0.297183	-0.542269	-0.419969	-0.675366	-0.480914
248.6	-0.421664	-0.409834	-0.313428	-0.563944	-0.427584	-0.541428	-0.495404
248.5	-0.368902	-0.520581	-0.271919	-0.511652	-0.373532	-0.729121	-0.601561
248.4	-0.313002	-0.540034	-0.296285	-0.500587	-0.428247	-0.62384	-0.555314
248.3	-0.448646	-0.600494	-0.413976	-0.623546	-0.477266	-0.788128	-0.658744
248.2	-0.577929	-0.502032	-0.533419	-0.683789	-0.501109	-0.672806	-0.614342
248.1	-0.540362	-0.532073	-0.438082	-0.657272	-0.373468	-0.667265	-0.650483
248	-0.475258	-0.521952	-0.30488	-0.591698	-0.286682	-0.683832	-0.618102
247.9	-0.394494	-0.565461	-0.215208	-0.637044	-0.241596	-0.687495	-0.742341
247.8	-0.405442	-0.403486	-0.181122	-0.555912	-0.173672	-0.664254	-0.686466
247.7	-0.434181	-0.280924	-0.240926	-0.606031	-0.239469	-0.662352	-0.615214
247.6	-0.457146	-0.406426	-0.211017	-0.685186	-0.214552	-0.72137	-0.680536
247.5	-0.418953	-0.432506	-0.256431	-0.736593	-0.234027	-0.752662	-0.621686
247.4	-0.381522	-0.4627	-0.271486	-0.811892	-0.243412	-0.656776	-0.68466
247.3	-0.451237	-0.417901	-0.346292	-0.844697	-0.315969	-0.714597	-0.741351
247.2	-0.567585	-0.405962	-0.511075	-0.991765	-0.476115	-0.913968	-0.835432
247.1	-0.637298	-0.42211	-0.556628	-0.954778	-0.405639	-0.80828	-0.81227
247	-0.64331	-0.510668	-0.5307	-1.02062	-0.46631	-0.837596	-0.941748
246.9	-0.773733	-0.615246	-0.637623	-1.11784	-0.540083	-0.896294	-0.940226
246.8	-0.68999	-0.65418	-0.61335	-1.06604	-0.53059	-0.820862	-0.88799
246.7	-0.596366	-0.561175	-0.510086	-0.889526	-0.430856	-0.848573	-0.818415
246.6	-0.603549	-0.532382	-0.512809	-0.873829	-0.420439	-1.00563	-0.948752
246.5	-0.604246	-0.617451	-0.453726	-0.825976	-0.430846	-1.01347	-0.951801
246.4	-0.48206	-0.797026	-0.23114	-0.63491	-0.33	-0.86728	-0.903556
246.3	-0.469634	-0.881626	-0.229014	-0.613694	-0.373934	-1.01918	-0.894656
246.2	-0.486221	-0.858482	-0.369821	-0.678611	-0.411721	-0.973174	-0.799542
246.1	-0.448008	-0.733755	-0.420628	-0.652808	-0.338198	-0.973005	-0.773595
246	-0.527788	-0.730656	-0.573378	-0.830808	-0.499398	-1.06545	-0.936716
245.9	-0.732587	-0.844398	-0.812997	-0.981737	-0.714317	-1.03029	-1.07823
245.8	-0.802183	-0.83354	-0.855593	-1.01075	-0.797253	-0.954738	-0.97082
245.7	-0.75772	-0.837674	-0.86666	-0.95397	-0.72863	-0.962996	-0.910374
245.6	-0.775941	-0.83214	-1.05959	-1.06229	-0.860941	-1.17165	-1.07898
245.5	-0.832253	-0.716241	-1.06668	-1.16588	-0.849433	-1.24991	-1.0008
245.4	-0.891133	-0.743667	-1.04405	-1.26305	-0.816913	-1.25016	-1.00358
245.3	-0.959033	-0.833009	-1.05441	-1.22313	-0.954673	-1.43331	-1.06758
245.2	-0.953452	-0.903482	-1.04514	-1.26267	-0.971852	-1.38335	-1.08176
245.1	-1.06102	-0.898152	-0.97948	-1.29178	-0.87814	-1.19758	-0.965022
245	-0.963794	-0.926621	-0.975144	-1.34655	-0.881144	-1.26668	-1.06137
244.9	-0.986752	-0.981042	-1.01462	-1.37074	-0.898192	-1.35426	-1.11192
244.8	-1.08659	-0.975669	-1.0847	-1.45227	-1.07674	-1.35281	-1.14217
244.7	-1.17671	-1.0137	-1.16865	-1.51006	-1.10806	-1.21006	-1.10893
244.6	-1.16879	-1.07723	-1.29741	-1.477	-1.16593	-1.26011	-1.14205
244.5	-1.14643	-1.03524	-1.23146	-1.46494	-1.14833	-1.10138	-1.2078
244.4	-1.25001	-1.06384	-1.30651	-1.62543	-1.15672	-1.07789	-1.32223
244.3	-1.2953	-1.14864	-1.36943	-1.63923	-1.25196	-1.26897	-1.38777
244.2	-1.29472	-1.1886	-1.46506	-1.6719	-1.23472	-1.45936	-1.56138
244.1	-1.29246	-1.15519	-1.59867	-1.67795	-1.25675	-1.38441	-1.60772
244	-1.37713	-1.1811	-1.60821	-1.73104	-1.2952	-1.17742	-1.57361
243.9	-1.36553	-1.20977	-1.51192	-1.7072	-1.21305	-1.24373	-1.66376
243.8	-1.40123	-1.24439	-1.5454	-1.79637	-1.27287	-1.2417	-1.80518
243.7	-1.50016	-1.21423	-1.60326	-1.81862	-1.32248	-1.31777	-1.89109
243.6	-1.52896	-1.30335	-1.55558	-1.83675	-1.35656	-1.33814	-1.96016
243.5	-1.39307	-1.3483	-1.48602	-1.73789	-1.28275	-1.39138	-2.00745
243.4	-1.43103	-1.38288	-1.54905	-1.814	-1.4063	-1.39772	-1.97436
243.3	-1.63132	-1.47494	-1.59065	-1.97171	-1.52671	-1.52028	-2.04449
243.2	-1.68682	-1.49166	-1.63333	-2.02435	-1.6234	-1.53765	-2.17111
243.1	-1.65279	-1.48552	-1.75682	-2.13524	-1.79437	-1.47833	-2.17674
243	-1.74807	-1.48567	-1.73718	-2.09173	-1.8343	-1.7207	-2.10769
242.9	-1.72271	-1.52756	-1.85822	-2.15759	-1.86984	-1.73515	-2.05699
242.8	-1.68459	-1.57735	-1.83304	-2.19836	-1.84735	-1.79506	-2.00786
242.7	-1.80567	-1.62561	-1.93057	-2.2649	-1.94725	-1.77896	-1.96574
242.6	-1.96556	-1.64272	-2.06819	-2.37968	-2.05724	-1.83177	-2.01878
242.5	-1.9366	-1.76426	-1.93412	-2.24049	-2.00554	-1.89826	-2.06362
242.4	-1.93286	-1.86145	-1.92507	-2.3454	-2.0143	-2.15816	-2.1384
242.3	-1.92337	-1.91609	-1.90482	-2.27243	-1.86078	-2.30682	-2.28753
242.2	-1.99689	-2.13475	-2.03172	-2.37151	-1.98222	-2.48216	-2.46784
242.1	-2.16921	-2.28119	-2.1843	-2.55458	-2.1109	-2.5753	-2.65678
242	-2.23961	-2.28521	-2.22761	-2.56911	-2.19788	-2.52521	-2.69308
241.9	-2.29283	-2.43655	-2.28774	-2.65748	-2.21763	-2.6593	-2.78587
241.8	-2.46103	-2.47923	-2.28573	-2.73414	-2.19149	-2.63182	-2.87344
241.7	-2.5854	-2.46545	-2.5048	-2.96006	-2.35695	-2.58653	-2.88914
241.6	-2.779	-2.48962	-2.70573	-3.01108	-2.56091	-2.47414	-2.84559
241.5	-2.89339	-2.56828	-2.72553	-3.06932	-2.57741	-2.37644	-2.81471
241.4	-3.05029	-2.59018	-2.7527	-3.2184	-2.62683	-2.31704	-2.95192
241.3	-3.10411	-2.62977	-2.78372	-3.18379	-2.71672	-2.23331	-2.92956
241.2	-3.23495	-2.71579	-2.95076	-3.28387	-2.85969	-2.47842	-2.98888
241.1	-3.22414	-2.71321	-2.93346	-3.32577	-2.91779	-2.55034	-3.10125
241	-3.30765	-2.70502	-2.99261	-3.39316	-3.11848	-2.53632	-3.18322
240.9	-3.3298	-2.77293	-3.09116	-3.42115	-3.13639	-2.67485	-3.30432
240.8	-3.46114	-2.86557	-3.11501	-3.51517	-3.20878	-2.87367	-3.37392
240.7	-3.44536	-2.94085	-3.10737	-3.646	-3.265	-2.97256	-3.44379
240.6	-3.40879	-3.04194	-3.22361	-3.69964	-3.34157	-2.95803	-3.60287
240.5	-3.56112	-3.04716	-3.43646	-3.87586	-3.41192	-3.15771	-3.61679
240.4	-3.50219	-3.15411	-3.32268	-3.90347	-3.48121	-3.18777	-3.76228
240.3	-3.64083	-3.28213	-3.51499	-4.01398	-3.5941	-3.18211	-3.81335
240.2	-3.91548	-3.36399	-3.70915	-4.21873	-3.78255	-3.30988	-3.8972
240.1	-3.98063	-3.4809	-3.80732	-4.38994	-3.92929	-3.33779	-3.94449
240	-4.0616	-3.53131	-3.92435	-4.41521	-3.96348	-3.39445	-4.06921
239.9	-4.19358	-3.63276	-4.07501	-4.56489	-4.07165	-3.41171	-4.14969
239.8	-4.37152	-3.69183	-4.26305	-4.65953	-4.2951	-3.61085	-4.23493
239.7	-4.39218	-3.84817	-4.24339	-4.63869	-4.2781	-3.83049	-4.40816
239.6	-4.6486	-3.81998	-4.47628	-4.75793	-4.55424	-3.96044	-4.53498
239.5	-4.65643	-3.9103	-4.44041	-4.71297	-4.49919	-3.98874	-4.74459
239.4	-4.74924	-4.05215	-4.5339	-4.77356	-4.4868	-3.89232	-4.80562
239.3	-4.88896	-4.11497	-4.54968	-4.81882	-4.58652	-3.94285	-4.8535
239.2	-4.94415	-4.20305	-4.59372	-4.88441	-4.73378	-4.01995	-4.92362
239.1	-5.03866	-4.25521	-4.71778	-4.97631	-4.89572	-4.16727	-5.10733
239	-5.21536	-4.43993	-4.89681	-5.14176	-5.06853	-4.24473	-5.33701
238.9	-5.3886	-4.56017	-5.00001	-5.40283	-5.23809	-4.3244	-5.40839
238.8	-5.45071	-4.71656	-5.12459	-5.46539	-5.35094	-4.55133	-5.50449
238.7	-5.61433	-4.78948	-5.37238	-5.74212	-5.52377	-4.76765	-5.4609
238.6	-5.74691	-4.85938	-5.61394	-5.91429	-5.7662	-4.84512	-5.49596
238.5	-5.69244	-4.94192	-5.72856	-5.97744	-5.83291	-5.02985	-5.59601
238.4	-5.80381	-5.04036	-5.83392	-6.16512	-5.91451	-4.99373	-5.79128
238.3	-6.07691	-5.20266	-5.96994	-6.30079	-6.08171	-4.90868	-5.99115
238.2	-6.11179	-5.38476	-6.01913	-6.36858	-6.12212	-5.14034	-6.02022
238.1	-6.19321	-5.43947	-6.17095	-6.33443	-6.27036	-5.2177	-6.0411
238	-6.42642	-5.59037	-6.29256	-6.49274	-6.33201	-5.38535	-6.22115
237.9	-6.56548	-5.75974	-6.31719	-6.59685	-6.44866	-5.28476	-6.3666
237.8	-6.71652	-5.86164	-6.39156	-6.71488	-6.60252	-5.48403	-6.53715
237.7	-7.02109	-5.96914	-6.54444	-6.88615	-6.76406	-5.67875	-6.71991
237.6	-7.40016	-6.04809	-6.86191	-7.11266	-7.02388	-5.67761	-6.79091
237.5	-7.47238	-6.18877	-6.8543	-7.18717	-7.14696	-5.93949	-6.82461
237.4	-7.59639	-6.24433	-7.05809	-7.41422	-7.22531	-6.12467	-6.8386
237.3	-7.83424	-6.26487	-7.28956	-7.61037	-7.44557	-6.29499	-7.05824
237.2	-7.95973	-6.41232	-7.45543	-7.83937	-7.53559	-6.34054	-7.19421
237.1	-8.16026	-6.42737	-7.62329	-8.00746	-7.68589	-6.32656	-7.18079
237	-8.34987	-6.43554	-7.75911	-8.25901	-7.89774	-6.24538	-7.30282
236.9	-8.3576	-6.63693	-7.95988	-8.48762	-8.13231	-6.30155	-7.59111
236.8	-8.40306	-6.69922	-8.05597	-8.63632	-8.29877	-6.57903	-7.74066
236.7	-8.68955	-6.80807	-8.41715	-8.8971	-8.57795	-6.82069	-7.94563
236.6	-8.8704	-6.87907	-8.68958	-8.98004	-8.83252	-6.89866	-8.14101
236.5	-9.00785	-7.14459	-8.71438	-9.1436	-8.87593	-7.15859	-8.34363
236.4	-9.38676	-7.1722	-8.85136	-9.37861	-9.21471	-7.1832	-8.55963
236.3	-9.54182	-7.28674	-9.04621	-9.51302	-9.36543	-7.3428	-8.73391
236.2	-9.68114	-7.52397	-9.29359	-9.71094	-9.60264	-7.55084	-8.85145
236.1	-9.87124	-7.6024	-9.31386	-9.84164	-9.76023	-7.61442	-8.92772
236	-10.0352	-7.86323	-9.44437	-9.97747	-9.79777	-7.64317	-9.16889
235.9	-10.2009	-7.99184	-9.50065	-10.0985	-9.94195	-7.65554	-9.36106
235.8	-10.3496	-8.17623	-9.58657	-10.381	-10.1957	-7.80248	-9.54338
235.7	-10.5898	-8.35466	-9.77267	-10.6002	-10.4187	-7.92805	-9.69159
235.6	-10.7755	-8.5547	-10.1039	-10.8268	-10.6816	-8.13143	-9.88049
235.5	-11.0141	-8.80433	-10.2647	-10.9727	-10.9388	-8.28254	-10.1846
235.4	-11.3381	-9.03889	-10.4836	-11.2846	-11.1888	-8.59661	-10.5086
235.3	-11.4031	-9.29225	-10.6156	-11.3702	-11.2379	-8.95123	-10.7914
235.2	-11.6793	-9.55922	-10.7778	-11.6126	-11.5361	-9.34323	-11.04
235.1	-11.9134	-9.86349	-11.0309	-11.9158	-11.7988	-9.55397	-11.2635
235	-12.0392	-9.97859	-11.1771	-12.0628	-11.9311	-9.63247	-11.3808
234.9	-12.2498	-10.1435	-11.3704	-12.2192	-12.1482	-9.66192	-11.5577
234.8	-12.3372	-10.3431	-11.4118	-12.194	-12.1928	-9.8437	-11.6218
234.7	-12.3716	-10.5438	-11.5068	-12.4763	-12.3744	-9.9395	-11.8092
234.6	-12.5428	-10.6891	-11.5879	-12.5862	-12.5494	-9.9381	-11.8482
234.5	-12.8277	-10.8258	-11.7875	-12.8576	-12.8372	-9.83783	-11.9994
234.4	-13.1049	-10.9191	-12.0393	-13.0158	-13.1944	-9.89189	-12.01
234.3	-13.2038	-11.0253	-12.2013	-13.2172	-13.3846	-10.1555	-12.1514
234.2	-13.4356	-11.1762	-12.3977	-13.4405	-13.5957	-10.3891	-12.4242
234.1	-13.7136	-11.2348	-12.6474	-13.7036	-13.7501	-10.4864	-12.4753
234	-13.9515	-11.3197	-12.9246	-14.0153	-14.067	-10.5839	-12.6939
233.9	-14.2657	-11.5578	-13.1954	-14.3102	-14.3136	-10.8295	-12.9364
233.8	-14.5334	-11.7838	-13.5591	-14.5101	-14.5543	-11.0606	-13.2296
233.7	-14.8136	-11.9661	-13.8121	-14.8023	-14.8533	-11.3568	-13.3769
233.6	-15.0953	-12.1709	-13.9978	-15.0391	-15.0139	-11.6052	-13.6747
233.5	-15.2872	-12.3033	-14.1896	-15.2611	-15.2019	-11.6839	-13.9311
233.4	-15.5848	-12.4471	-14.547	-15.5617	-15.549	-11.72	-14.198
233.3	-15.933	-12.8463	-14.8506	-15.8219	-15.9586	-12.1846	-14.5834
233.2	-16.2698	-13.0742	-15.1187	-16.0931	-16.1755	-12.3623	-14.7694
233.1	-16.5204	-13.2002	-15.3402	-16.4756	-16.4629	-12.5301	-14.9728
233	-16.9228	-13.2745	-15.573	-16.9391	-16.7404	-12.6782	-15.0535
232.9	-17.0836	-13.4569	-15.8276	-17.1973	-16.9473	-12.7692	-15.378
232.8	-17.3273	-13.6221	-16.0401	-17.434	-17.0932	-12.9308	-15.529
232.7	-17.5266	-13.84	-16.3367	-17.7627	-17.3499	-13.2091	-15.6915
232.6	-17.8344	-14.0667	-16.6484	-18.1036	-17.6511	-13.464	-16.0125
232.5	-18.2091	-14.3132	-16.8518	-18.4312	-17.919	-13.6466	-16.2372
232.4	-18.4625	-14.5998	-17.1432	-18.775	-18.2903	-13.8158	-16.4277
232.3	-18.6411	-14.876	-17.3402	-19.0359	-18.5736	-14.0679	-16.6993
232.2	-18.7466	-15.0603	-17.4907	-19.1249	-18.9028	-14.2273	-17.0045
232.1	-19.045	-15.3322	-17.6913	-19.3068	-19.0942	-14.2734	-17.3718
232	-19.3662	-15.4937	-17.9742	-19.6054	-19.4233	-14.5179	-17.6708
231.9	-19.7484	-15.7795	-18.2625	-19.9482	-19.7205	-14.8087	-17.9213
231.8	-19.9066	-16.0183	-18.4028	-20.0927	-20.0402	-15.0832	-18.0554
231.7	-20.1199	-16.306	-18.6627	-20.3584	-20.3804	-15.4483	-18.4533
231.6	-20.4639	-16.5517	-18.9886	-20.607	-20.7372	-15.71	-18.8695
231.5	-20.806	-16.7489	-19.373	-20.9532	-21.0799	-15.922	-19.0678
231.4	-21.1994	-17.0804	-19.7437	-21.2117	-21.3839	-16.2669	-19.369
231.3	-21.6414	-17.3057	-20.0704	-21.5718	-21.8248	-16.3486	-19.5372
231.2	-21.8921	-17.7004	-20.368	-21.9201	-22.1191	-16.7101	-19.8572
231.1	-22.1065	-17.8053	-20.4805	-22.0979	-22.3059	-16.7601	-19.9351
231	-22.5654	-18.073	-20.8283	-22.4871	-22.6604	-17.0108	-20.3198
230.9	-22.702	-18.2581	-21.0273	-22.713	-22.8366	-17.1748	-20.4739
230.8	-22.9001	-18.5871	-21.0395	-22.949	-23.0515	-17.3287	-20.6165
230.7	-23.0681	-18.7143	-21.3044	-23.1045	-23.2858	-17.348	-20.8346
230.6	-23.3572	-18.9314	-21.5281	-23.3993	-23.6278	-17.7366	-21.1754
230.5	-23.5492	-19.0046	-21.7324	-23.7857	-23.8994	-17.9618	-21.4384
230.4	-23.6131	-19.0699	-21.8053	-23.9415	-23.9037	-18.0547	-21.6328
230.3	-23.894	-19.3241	-22.0875	-24.2433	-24.2942	-18.2038	-21.9324
230.2	-24.2402	-19.4712	-22.4908	-24.6198	-24.698	-18.4741	-22.2741
230.1	-24.4706	-19.7535	-22.654	-24.7935	-24.9608	-18.4504	-22.54
230	-24.6698	-19.9003	-22.9235	-25.0827	-25.1258	-18.6519	-22.7583
229.9	-25.1735	-20.048	-23.2949	-25.4587	-25.6753	-18.9727	-23.1395
229.8	-25.4779	-20.2575	-23.5581	-25.7265	-25.8481	-19.1549	-23.3495
229.7	-25.8631	-20.5243	-23.9682	-26.0939	-26.1639	-19.276	-23.7759
229.6	-26.0984	-20.7935	-24.2639	-26.3901	-26.3584	-19.5548	-24.0346
229.5	-26.3988	-21.0951	-24.5149	-26.6664	-26.7168	-19.8404	-24.1965
229.4	-26.6139	-21.4159	-24.6537	-26.9548	-26.9356	-19.8982	-24.5549
229.3	-26.8628	-21.5711	-24.8716	-27.306	-27.221	-20.1582	-24.7642
229.2	-27.249	-21.784	-25.1494	-27.6441	-27.6419	-20.3699	-25.2321
229.1	-27.3771	-21.9784	-25.4187	-27.9775	-27.8278	-20.4853	-25.4889
229	-27.5554	-22.3337	-25.5715	-28.4004	-28.0034	-20.5696	-25.8207
228.9	-27.7855	-22.5911	-25.837	-28.6157	-28.2534	-20.7966	-26.0601
228.8	-28.1401	-22.6983	-25.9594	-28.9937	-28.6279	-20.8389	-26.0793
228.7	-28.3727	-23.0685	-26.2635	-29.1735	-28.8676	-21.0693	-26.3786
228.6	-28.6714	-23.3042	-26.4306	-29.4079	-29.3269	-21.4188	-26.6239
228.5	-28.9897	-23.5087	-26.7193	-29.6347	-29.488	-21.651	-26.8762
228.4	-29.2946	-23.8527	-26.9787	-29.9292	-29.7583	-21.7167	-27.1634
228.3	-29.5946	-24.1487	-27.2366	-30.1996	-30.0549	-22.0674	-27.3673
228.2	-29.8326	-24.2479	-27.3853	-30.3582	-30.2844	-22.4311	-27.6469
228.1	-29.9805	-24.3544	-27.5044	-30.5613	-30.5958	-22.6617	-27.814
228	-30.2121	-24.6536	-27.9465	-30.7677	-30.8563	-22.724	-28.0997
227.9	-30.4425	-24.6146	-28.1453	-30.9862	-31.0242	-22.695	-28.2961
227.8	-30.6606	-24.7479	-28.3159	-31.3488	-31.2036	-22.7024	-28.564
227.7	-30.79	-24.8203	-28.5618	-31.6997	-31.4715	-22.8681	-28.8354
227.6	-31.2627	-24.9112	-28.9374	-32.1589	-31.8195	-22.8814	-28.911
227.5	-31.4643	-25.089	-29.1593	-32.4304	-32.3127	-23.1258	-29.1817
227.4	-31.7546	-25.348	-29.4267	-32.7086	-32.4774	-23.2805	-29.3541
227.3	-32.0758	-25.5322	-29.7776	-33.059	-32.8954	-23.3513	-29.4735
227.2	-32.2156	-25.5898	-29.9908	-33.2838	-33.1745	-23.5942	-29.5256
227.1	-32.5956	-25.8045	-30.0783	-33.6698	-33.5946	-23.8283	-29.7873
227	-32.8162	-25.9964	-30.2752	-33.8427	-33.7373	-24.0247	-30.0124
226.9	-33.0259	-26.1628	-30.4982	-33.905	-33.9532	-24.1867	-30.0426
226.8	-33.2569	-26.322	-30.755	-34.0475	-34.1349	-24.3186	-30.2988
226.7	-33.5554	-26.3681	-30.8903	-34.279	-34.3401	-24.7709	-30.353
226.6	-33.8451	-26.7142	-31.095	-34.4767	-34.6525	-25.004	-30.6934
226.5	-33.9209	-26.9417	-31.1132	-34.5722	-34.6704	-25.162	-31.049
226.4	-34.0535	-27.0994	-31.2857	-34.763	-34.7151	-25.3937	-31.3936
226.3	-34.3358	-27.227	-31.592	-35.0197	-35.0182	-25.4406	-31.5205
226.2	-34.503	-27.3194	-31.7292	-35.2704	-35.0777	-25.5666	-31.6435
226.1	-34.7276	-27.4627	-31.8638	-35.6396	-35.3758	-25.7693	-31.8882
226	-34.7993	-27.8376	-32.069	-35.8114	-35.5564	-25.9625	-32.1974
225.9	-34.97	-28.1163	-32.2958	-36.0316	-35.8191	-25.9414	-32.5421
225.8	-35.0932	-28.1408	-32.4912	-36.2437	-35.9935	-25.9025	-32.6666
225.7	-35.3592	-28.2176	-32.5887	-36.4495	-36.1618	-25.9049	-32.7613
225.6	-35.5065	-28.2942	-32.846	-36.7329	-36.5147	-25.6629	-32.864
225.5	-35.6173	-28.4865	-33.0659	-36.8985	-36.425	-25.6705	-33.2107
225.4	-35.7689	-28.857	-33.2571	-37.1054	-36.7023	-25.8227	-33.5172
225.3	-35.8135	-29.0029	-33.2536	-37.1514	-36.8075	-25.9352	-33.6712
225.2	-35.9718	-29.0566	-33.3336	-37.3101	-36.893	-25.9292	-33.7448
225.1	-36.1248	-29.0942	-33.4082	-37.3724	-36.971	-26.1482	-33.822
225	-36.1321	-29.3992	-33.6302	-37.6556	-37.0775	-26.4389	-34.1206
224.9	-36.3014	-29.4389	-33.8514	-37.8039	-37.2361	-26.6717	-34.3175
224.8	-36.3824	-29.4797	-33.8677	-37.8262	-37.2826	-26.5754	-34.2597
224.7	-36.4873	-29.7014	-33.7831	-37.856	-37.5447	-27.1067	-34.5467
224.6	-36.662	-29.6021	-33.8772	-38.1171	-37.8442	-27.2595	-34.5203
224.5	-36.9101	-29.7415	-34.1718	-38.1565	-37.9582	-27.4627	-34.5359
224.4	-37.0372	-29.7645	-34.4761	-38.481	-38.2269	-27.1888	-34.5756
224.3	-37.2387	-29.766	-34.6286	-38.7397	-38.4539	-27.2908	-34.6135
224.2	-37.295	-29.6975	-34.5591	-38.8691	-38.5222	-27.2823	-34.738
224.1	-37.4387	-29.8538	-34.6218	-38.9656	-38.8309	-27.3601	-34.8055
224	-37.669	-29.8332	-35.0463	-39.2125	-39.1238	-27.3431	-34.8938
223.9	-37.7683	-29.9645	-35.1977	-39.4324	-39.276	-27.2353	-34.956
223.8	-37.8755	-30.1182	-35.4109	-39.4617	-39.2872	-27.3679	-35.175
223.7	-37.9563	-30.2823	-35.4767	-39.6695	-39.3823	-27.3488	-35.4269
223.6	-37.9946	-30.5007	-35.3796	-39.6756	-39.4735	-27.8414	-35.6392
223.5	-38.1021	-30.6358	-35.5523	-39.7003	-39.7061	-27.8736	-35.7948
223.4	-38.208	-30.6776	-35.7251	-39.855	-39.9028	-27.9182	-35.7696
223.3	-38.3699	-30.8915	-35.8821	-40.0329	-39.9239	-27.8981	-36.0594
223.2	-38.5126	-31.1175	-35.8666	-40.0973	-39.9098	-28.1346	-36.1809
223.1	-38.6429	-31.1437	-36.043	-39.9775	-39.9917	-28.0974	-36.1883
223	-38.5014	-31.2427	-36.1132	-40.1103	-39.9897	-27.9918	-36.1609
222.9	-38.597	-30.9627	-35.9674	-39.9622	-39.933	-27.9976	-36.1793
222.8	-38.7845	-31.165	-36.1675	-40.067	-39.9964	-27.9506	-36.2232
222.7	-38.8233	-31.2627	-36.261	-40.1231	-40.0765	-27.9126	-36.3452
222.6	-38.933	-31.3961	-36.1585	-40.0541	-40.0431	-28.0484	-36.4521
222.5	-39.0399	-31.3103	-36.1062	-40.042	-40.229	-27.9844	-36.4324
222.4	-38.9634	-31.3081	-36.1654	-40.0036	-40.1834	-28.1224	-36.3692
222.3	-38.9354	-31.267	-36.1947	-40.1252	-40.1418	-28.1079	-36.4698
222.2	-38.8754	-31.2451	-36.2022	-40.1351	-40.1503	-28.2127	-36.477
222.1	-38.8758	-31.2938	-36.3569	-40.1882	-40.3087	-28.2377	-36.4847
222	-38.9217	-31.4325	-36.5086	-40.2513	-40.4145	-28.3744	-36.618
221.9	-38.9739	-31.4583	-36.412	-40.3429	-40.4569	-28.3643	-36.4778
221.8	-38.8506	-31.4214	-36.5349	-40.4147	-40.4331	-28.5114	-36.6619
221.7	-38.9551	-31.3833	-36.6106	-40.3538	-40.2226	-28.2956	-36.5037
221.6	-38.7594	-31.5002	-36.4734	-40.458	-40.2775	-28.0835	-36.5533
221.5	-38.945	-31.4353	-36.456	-40.3725	-40.3158	-28.4023	-36.7211
221.4	-38.9573	-31.5533	-36.2131	-40.2973	-40.1425	-28.5055	-36.7095
221.3	-38.9752	-31.5458	-36.2621	-40.3439	-40.1953	-28.4741	-36.7194
221.2	-38.9788	-31.5322	-36.0809	-40.1918	-40.1225	-28.3061	-36.6031
221.1	-38.9274	-31.3491	-36.1938	-40.1069	-40.0361	-28.3699	-36.6162
221	-39.0116	-31.3894	-36.1324	-39.9577	-40.02	-28.0916	-36.5555
220.9	-39.0328	-31.6565	-36.1094	-39.978	-40.0198	-28.0663	-36.6948
220.8	-39.214	-31.6304	-36.2584	-39.9869	-40.0152	-27.9717	-36.6692
220.7	-39.2838	-31.6461	-36.2725	-40.0498	-40.0976	-28.1051	-36.4892
220.6	-39.3572	-31.6902	-36.3503	-39.9123	-40.24	-27.8374	-36.6049
220.5	-39.4764	-31.714	-36.5837	-39.9867	-40.2795	-27.6992	-36.616
220.4	-39.4512	-31.6823	-36.6295	-40.0693	-40.3106	-27.7912	-36.8071
220.3	-39.6239	-31.8388	-36.5931	-40.1492	-40.3431	-27.4303	-36.8639
220.2	-39.6358	-31.9104	-36.7953	-40.2682	-40.3408	-27.5461	-37.0977
220.1	-39.6364	-31.8419	-36.902	-40.271	-40.4261	-27.4525	-36.9733
220	-39.6904	-31.7315	-36.9327	-40.2304	-40.3961	-27.4289	-36.8582
219.9	-39.3384	-31.6688	-36.8467	-40.006	-40.2877	-27.2296	-36.8008
219.8	-39.2574	-31.6479	-37.0751	-40.0709	-39.9842	-27.021	-36.7896
219.7	-39.2053	-31.5248	-36.9026	-39.9673	-39.8226	-27.1113	-36.7034
219.6	-39.2292	-31.4862	-36.784	-39.8636	-39.5744	-27.0735	-36.6388
219.5	-39.2982	-31.513	-36.7255	-39.7876	-39.4699	-27.0934	-36.5448
219.4	-39.173	-31.5553	-36.7713	-39.6589	-39.3985	-27.198	-36.4488
219.3	-39.0793	-31.4248	-36.568	-39.5036	-39.0974	-27.0503	-36.3108
219.2	-38.8743	-31.5587	-36.4889	-39.6406	-39.1366	-27.2684	-36.3875
219.1	-38.9787	-31.6164	-36.3746	-39.8016	-39.0392	-27.2928	-36.396
219	-38.9843	-31.564	-36.1494	-39.8122	-39.2195	-27.377	-36.3584
218.9	-39.0159	-31.5519	-36.2869	-39.9348	-39.3969	-27.3537	-36.5255
218.8	-38.8804	-31.5847	-36.2258	-39.8413	-39.4331	-27.3443	-36.4372
218.7	-38.6728	-31.382	-36.1502	-39.6916	-39.3837	-27.1682	-36.3837
218.6	-38.7144	-31.4313	-36.1447	-39.9208	-39.5171	-27.3254	-36.3596
218.5	-38.7982	-31.3151	-36.0758	-39.8691	-39.5841	-27.5224	-36.3406
218.4	-38.8673	-31.1227	-36.1217	-39.745	-39.2448	-27.1994	-36.3151
218.3	-38.9454	-31.1049	-36.0327	-39.6536	-39.1704	-27.2749	-36.3374
218.2	-38.9579	-31.1315	-36.1056	-39.6065	-39.2272	-27.3048	-36.3338
218.1	-38.8012	-31.2004	-36.0738	-39.5916	-39.0739	-27.1953	-36.0795
218	-38.6878	-31.2013	-36.1222	-39.6257	-39.0274	-27.1426	-36.059
217.9	-38.912	-31.197	-36.1944	-39.451	-39.1206	-27.1176	-35.9211
217.8	-38.9781	-31.1213	-36.1119	-39.2409	-38.922	-27.0455	-35.7783
217.7	-38.7423	-31.04	-36.0181	-39.2712	-38.8832	-26.7755	-35.7185
217.6	-38.6453	-31.2583	-35.9462	-39.1916	-38.9966	-26.9392	-35.7522
217.5	-38.5815	-31.0575	-35.8906	-39.0687	-38.9171	-26.565	-35.6628
217.4	-38.4472	-30.9748	-35.8092	-38.8151	-38.7292	-26.5231	-35.6481
217.3	-38.3845	-30.812	-35.7259	-38.4531	-38.6801	-26.1899	-35.5737
217.2	-38.4687	-30.9252	-35.8507	-38.4875	-38.6786	-25.9645	-35.5374
217.1	-38.3104	-30.7747	-35.6431	-38.394	-38.5171	-25.808	-35.4712
217	-38.1877	-30.7497	-35.5827	-38.2788	-38.4897	-25.8418	-35.4167
216.9	-38.4187	-30.7911	-35.5629	-38.1205	-38.5188	-25.968	-35.4467
216.8	-38.5038	-30.6535	-35.7846	-38.0941	-38.6586	-25.8863	-35.2991
216.7	-38.4501	-30.703	-36.039	-38.2252	-38.632	-26.0061	-35.2609
216.6	-38.4616	-30.8271	-36.1065	-38.3318	-38.5052	-25.8256	-35.1663
216.5	-38.3884	-30.7514	-35.9676	-38.2512	-38.4774	-25.9314	-35.053
216.4	-38.5118	-30.6384	-36.0231	-38.3492	-38.4589	-26.1783	-35.0264
216.3	-38.5282	-30.672	-35.9811	-38.4096	-38.445	-26.0272	-34.9797
216.2	-38.6085	-30.6863	-36.1468	-38.456	-38.4608	-25.9157	-34.9772
216.1	-38.5425	-30.7641	-36.1018	-38.4478	-38.3719	-25.9081	-34.9968
216	-38.3123	-30.7514	-36.0313	-38.4822	-38.2531	-25.5912	-35.0313
215.9	-38.1688	-30.6456	-35.9371	-38.3756	-38.0546	-25.5755	-35.0816
215.8	-38.3017	-30.6546	-35.9181	-38.2679	-38.1073	-25.4879	-34.9621
215.7	-38.322	-30.5141	-35.7992	-38.1073	-38.1411	-25.5291	-35.0615
215.6	-38.2001	-30.5987	-35.788	-38.1893	-38.2498	-25.4699	-35.0906
215.5	-38.0835	-30.4782	-35.7044	-38.0249	-38.2162	-25.2979	-34.9084
215.4	-37.9572	-30.7285	-35.7891	-37.9213	-38.2025	-25.5283	-34.997
215.3	-37.9807	-30.7886	-35.7097	-38.1342	-38.251	-25.5366	-34.9329
215.2	-38.1719	-31.0606	-35.8059	-38.1132	-38.2327	-25.4646	-34.8074
215.1	-38.2724	-31.2437	-35.6151	-38.0533	-38.2537	-25.3795	-34.8804
215	-38.4628	-31.3702	-35.6161	-37.9135	-38.1971	-25.2642	-35.0207
214.9	-38.341	-31.2676	-35.7104	-37.9088	-38.2455	-25.5153	-34.7461
214.8	-38.4958	-31.2589	-35.8234	-37.9492	-38.0659	-25.2899	-34.7002
214.7	-38.4145	-31.2004	-35.8707	-37.9257	-38.0899	-25.3417	-34.6914
214.6	-38.5189	-31.3153	-35.98	-38.074	-38.0741	-25.0545	-34.8667
214.5	-38.5482	-31.2769	-36.1351	-37.9581	-38.0043	-24.8779	-34.92
214.4	-38.5554	-31.2985	-36.1141	-37.8601	-38.0374	-25.0773	-34.9416
214.3	-38.4459	-31.1625	-36.2344	-37.9545	-38.0365	-25.3799	-35.0247
214.2	-38.5669	-31.1408	-36.5031	-37.9446	-38.1574	-25.4409	-34.9077
214.1	-38.6067	-31.259	-36.434	-38.0442	-38.2629	-25.489	-35.0413
214	-38.6496	-31.5407	-36.3318	-38.0767	-38.081	-25.3941	-35.1933
213.9	-38.8186	-31.8076	-36.3555	-37.966	-38.1569	-25.5362	-35.2522
213.8	-39.0783	-31.8923	-36.3536	-38.2044	-38.4611	-25.5956	-35.0286
213.7	-39.1498	-31.7603	-36.2636	-38.1316	-38.461	-25.7105	-34.9982
213.6	-39.2383	-31.6833	-36.3305	-38.322	-38.4591	-25.6341	-34.885
213.5	-39.3458	-31.5645	-36.4033	-38.2116	-38.42	-25.5553	-34.905
213.4	-39.4785	-31.7843	-36.4107	-38.0494	-38.5986	-25.0441	-34.8584
213.3	-39.4646	-31.5964	-36.3247	-38.2377	-38.6034	-25.0574	-34.715
213.2	-39.3889	-31.5036	-36.5518	-38.3015	-38.6935	-25.2735	-34.7465
213.1	-39.3683	-31.4387	-36.6923	-38.261	-38.8344	-25.4045	-34.7814
213	-39.2178	-31.5317	-36.9574	-38.3687	-38.6495	-25.4136	-34.8703
212.9	-39.289	-31.7845	-37.2431	-38.228	-38.6611	-25.494	-34.9254
212.8	-39.6857	-31.911	-37.5283	-38.3146	-38.9963	-25.6414	-35.1148
212.7	-39.698	-32.0618	-37.5609	-38.5889	-39.2918	-25.628	-34.9623
212.6	-39.773	-32.3281	-37.6786	-38.8254	-39.0722	-25.933	-35.1593
212.5	-39.8995	-32.5694	-38.008	-39.0093	-39.2131	-25.853	-35.3344
212.4	-40.0588	-32.5732	-38.074	-39.1742	-39.3614	-25.7054	-35.2256
212.3	-40.2183	-32.788	-38.0684	-39.2381	-39.5154	-25.8451	-35.3499
212.2	-40.5184	-32.6851	-38.1559	-39.181	-39.7101	-26.0345	-35.3301
212.1	-40.6997	-32.9094	-38.1521	-39.4858	-39.6241	-26.2358	-35.4631
212	-40.5672	-32.9086	-38.3601	-39.6506	-39.66	-26.1819	-35.3541
211.9	-40.6817	-33.1015	-38.5366	-39.8097	-39.6651	-26.3606	-35.6175
211.8	-41.0386	-33.1321	-38.7174	-40.0533	-39.8531	-26.466	-35.8676
211.7	-41.2002	-33.188	-38.858	-40.0921	-40.2547	-26.7402	-35.9323
211.6	-41.4352	-33.3976	-38.8995	-40.218	-40.2671	-26.7708	-36.1353
211.5	-41.6722	-33.6017	-39.2686	-40.2124	-40.2884	-26.7987	-36.2554
211.4	-41.9082	-33.8388	-39.5213	-40.6422	-40.3559	-26.972	-36.5091
211.3	-42.2033	-34.0434	-39.955	-40.9304	-40.5772	-26.8485	-36.8596
211.2	-42.4743	-34.1346	-39.9419	-41.1012	-40.8249	-26.7727	-37.0653
211.1	-42.7801	-34.3461	-40.042	-41.3612	-40.858	-26.9178	-37.198
211	-42.9507	-34.5087	-40.2689	-41.5001	-41.2295	-27.1789	-37.3457
210.9	-43.1219	-34.5977	-40.3074	-41.7329	-41.3591	-27.4093	-37.414
210.8	-43.3392	-34.7597	-40.4872	-41.7831	-41.4399	-27.2338	-37.5268
210.7	-43.6959	-35.1336	-40.6152	-42.0006	-41.8554	-27.4038	-37.6721
210.6	-43.8799	-35.221	-40.6317	-42.1872	-41.97	-27.2767	-37.5715
210.5	-44.0797	-35.478	-40.5831	-42.227	-42.302	-27.672	-37.5569
210.4	-44.4659	-35.4054	-40.9617	-42.3454	-42.6874	-27.4765	-37.7172
210.3	-44.382	-35.6849	-40.9642	-42.222	-42.8456	-27.6341	-37.9207
210.2	-44.6721	-36.0047	-41.2985	-42.2217	-42.948	-27.5784	-38.1688
210.1	-44.9991	-36.1735	-41.612	-42.4633	-43.3541	-27.3043	-38.1433
210	-45.1864	-36.3426	-41.9211	-42.5813	-43.3934	-27.3685	-38.2135
209.9	-45.4414	-36.6478	-42.2741	-43.0238	-43.5488	-27.4988	-38.3493
209.8	-45.5642	-36.8263	-42.615	-43.3717	-43.8447	-27.9277	-38.9271
209.7	-45.685	-37.165	-42.8877	-43.4683	-44.1151	-28.0457	-39.3565
209.6	-45.9994	-37.4015	-43.2115	-43.983	-44.2377	-28.0289	-39.6506
209.5	-46.2663	-37.4782	-43.7718	-44.4278	-44.3568	-28.0798	-39.611
209.4	-46.5669	-37.8144	-44.0941	-44.9327	-44.6567	-28.2745	-39.9241
209.3	-46.679	-38.1336	-44.4497	-45.1974	-44.9916	-28.4902	-40.247
209.2	-46.975	-38.3841	-44.7805	-45.4253	-45.3209	-28.7222	-40.4218
209.1	-47.3133	-38.6019	-45.0928	-45.6909	-45.5888	-28.8317	-40.4472
209	-47.2728	-38.8162	-45.4406	-45.8314	-45.6745	-28.8544	-40.4023
208.9	-47.5503	-38.9646	-45.6191	-46.2378	-45.8062	-29.1146	-40.4144
208.8	-47.6807	-39.1363	-46.23	-46.5801	-45.8183	-29.3204	-40.2874
208.7	-47.795	-39.2863	-46.4202	-46.6133	-45.8079	-29.5214	-40.4787
208.6	-48.1424	-39.7916	-47.0398	-46.8219	-46.1212	-30.056	-40.6939
208.5	-48.2332	-39.8067	-47.2659	-46.835	-46.3562	-30.3715	-40.6188
208.4	-48.4837	-39.8667	-47.3474	-46.8741	-46.4044	-30.2342	-40.6257
208.3	-48.792	-40.0372	-47.4738	-46.9807	-46.5959	-30.3806	-40.842
208.2	-48.687	-40.1587	-47.6433	-46.9298	-46.9274	-30.5987	-40.8584
208.1	-48.6136	-40.2286	-47.8199	-46.812	-46.9735	-30.484	-40.9119
208	-48.9595	-40.4494	-47.8667	-46.9752	-47.0439	-30.3824	-40.9669
207.9	-48.97	-40.6221	-47.8103	-47.2088	-47.3206	-30.2011	-40.9678
207.8	-49.1211	-40.7607	-47.4958	-47.4728	-47.0698	-30.033	-41.0343
207.7	-49.348	-40.7912	-47.6923	-47.5376	-47.3869	-30.183	-40.8557
207.6	-49.4518	-40.971	-47.7072	-47.613	-47.0211	-30.1237	-40.879
207.5	-49.2223	-41.1533	-47.7899	-47.6857	-46.902	-30.2824	-41.01
207.4	-49.7162	-41.4468	-48.0067	-47.7596	-46.9486	-30.2066	-41.2761
207.3	-49.8929	-41.4137	-48.0454	-47.4869	-47.0966	-30.3064	-41.0624
207.2	-49.7586	-41.4599	-47.6256	-47.1744	-46.9717	-30.354	-41.0206
207.1	-49.5375	-41.6708	-47.8119	-46.9062	-46.8736	-30.663	-40.8146
207	-50.0186	-41.4191	-48.3581	-46.8452	-47.1883	-30.5323	-40.9013
206.9	-50.2633	-41.5055	-48.4736	-46.8676	-46.9006	-30.1704	-40.7201
206.8	-50.295	-41.5332	-48.766	-46.8133	-46.9087	-30.4849	-40.5095
206.7	-50.5333	-41.4606	-48.549	-46.7181	-47.0044	-29.9407	-40.3515
206.6	-50.1597	-41.5419	-48.6033	-46.4687	-46.7639	-29.5834	-40.2531
206.5	-49.8649	-41.3589	-48.7835	-46.3925	-46.9245	-29.3908	-40.1751
206.4	-49.9733	-41.1949	-48.737	-46.6447	-46.7383	-29.0931	-39.9167
206.3	-49.8549	-41.0412	-48.5971	-46.4221	-46.9215	-28.5961	-39.7961
206.2	-49.664	-41.0972	-48.7822	-46.1209	-46.5889	-28.2935	-39.6097
206.1	-49.1425	-41.2055	-48.3786	-45.9389	-46.4251	-27.9685	-39.5892
206	-49.1327	-41.1661	-47.7985	-45.7992	-46.2008	-27.7657	-39.2826
205.9	-48.9874	-41.1345	-47.8515	-45.4121	-45.866	-27.7159	-39.0101
205.8	-48.9027	-40.6416	-47.4714	-45.4207	-45.2725	-27.5031	-38.6631
205.7	-48.803	-40.4668	-47.2836	-45.1098	-44.6437	-27.4641	-38.5303
205.6	-48.4112	-40.3778	-47.5078	-44.5262	-44.28	-27.4757	-38.4224
205.5	-48.1479	-40.3237	-46.7159	-43.9424	-43.3957	-27.2614	-37.8328
205.4	-47.768	-40.147	-46.3418	-43.7231	-43.0424	-27.4343	-37.6883
205.3	-47.0307	-39.8816	-45.9548	-43.2165	-42.3197	-27.3612	-37.6166
205.2	-46.4789	-39.2549	-46.0271	-42.5599	-41.7605	-27.0474	-37.234
205.1	-45.7685	-39.2097	-45.2385	-42.1012	-41.2342	-27.0243	-36.7668
205	-45.4892	-38.9605	-44.5724	-41.5085	-41.1609	-26.6303	-36.1985
204.9	-45.2752	-38.8415	-44.1479	-40.9855	-40.5357	-26.3983	-35.5908
204.8	-44.6921	-38.8265	-43.6485	-40.3199	-40.1986	-26.0845	-34.8939
204.7	-44.2711	-38.3145	-43.3406	-39.9557	-39.9655	-25.4644	-34.7702
204.6	-43.5057	-37.6822	-42.873	-39.4433	-39.0248	-25.0681	-34.0449
204.5	-43.2728	-37.3155	-42.7322	-38.68	-38.8174	-24.1695	-33.279
204.4	-42.982	-37.228	-42.7129	-38.1913	-38.7544	-24.2573	-32.3497
204.3	-42.9414	-37.0714	-42.4965	-37.7323	-38.5241	-23.7636	-31.9539
204.2	-42.4427	-36.3703	-42.0235	-36.7411	-38.3597	-23.2171	-31.5352
204.1	-41.6267	-35.7529	-41.7999	-35.7745	-37.6883	-22.2187	-30.7238
204	-41.4078	-35.3588	-41.3475	-35.2091	-37.1723	-21.6813	-30.0825
203.9	-40.2643	-35.0375	-40.9142	-34.6949	-36.5084	-21.3212	-29.142
203.8	-40.2779	-34.88	-40.5166	-34.3498	-36.1378	-20.9272	-28.2755
203.7	-40.0286	-34.5763	-40.0657	-33.5552	-34.9822	-20.622	-27.8241
203.6	-39.624	-33.6241	-39.4351	-32.4958	-34.0619	-20.0415	-27.072
203.5	-38.9524	-33.1237	-38.8258	-32.1502	-33.3481	-19.958	-26.5028
203.4	-38.4147	-32.7733	-38.1142	-31.8758	-32.5162	-19.2501	-25.5153
203.3	-37.4128	-32.7493	-37.8557	-31.3818	-32.0648	-18.7181	-25.3076
203.2	-36.7077	-32.0572	-37.5573	-31.1681	-31.6172	-18.1821	-24.6338
203.1	-36.5582	-30.9875	-36.5541	-30.0566	-30.6886	-17.7116	-24.2099
203	-35.7377	-30.2437	-35.9331	-29.2102	-29.7594	-17.2393	-23.6976
202.9	-34.8407	-29.6736	-35.3028	-28.5532	-28.7754	-16.4976	-22.8943
202.8	-34.1112	-28.7859	-34.6242	-28.1294	-28.3917	-15.8395	-22.6459
202.7	-33.6496	-28.3933	-34.4522	-27.4902	-27.9442	-14.9913	-22.0436
202.6	-32.682	-27.8033	-33.7621	-26.2219	-27.0129	-14.3821	-20.6687
202.5	-32.0246	-26.7582	-33.1673	-25.3732	-26.2763	-14.3934	-19.7137
202.4	-31.2672	-26.1623	-31.8825	-24.339	-24.8956	-13.7056	-19.0785
202.3	-30.0746	-25.9402	-30.9467	-23.9903	-24.2733	-13.3806	-18.4346
202.2	-29.401	-25.8083	-29.888	-23.0369	-23.6651	-12.7077	-17.5099
202.1	-29.0694	-25.7185	-29.2113	-22.2324	-22.8118	-12.1588	-16.7676
202	-27.7573	-25.3654	-27.7593	-21.4363	-21.3886	-11.4721	-16.1373
201.9	-26.99	-24.786	-26.9921	-20.8147	-20.5508	-11.2291	-15.4889
201.8	-26.2082	-23.9661	-26.3474	-20.2776	-19.4619	-10.6381	-15.5954
201.7	-25.6561	-23.1627	-25.5737	-19.7085	-18.7933	-9.65393	-14.9145
201.6	-24.4424	-22.6153	-24.8743	-18.9709	-18.351	-8.98044	-14.3011
201.5	-23.5763	-22.1866	-24.243	-17.7726	-17.2098	-8.64366	-12.7154
201.4	-22.3969	-21.258	-23.6529	-17.1752	-16.3057	-7.79362	-12.2624
201.3	-21.234	-20.3398	-23.3691	-16.1127	-15.032	-7.02604	-11.5974
201.2	-20.2104	-19.3721	-22.1491	-15.0136	-14.7575	-6.15229	-10.2151
201.1	-19.0748	-18.4072	-21.8328	-13.8436	-13.6768	-4.89414	-9.05418
201	-17.8624	-17.6882	-20.8494	-12.2675	-12.0605	-4.18964	-7.24582
200.9	-16.3158	-16.9508	-19.5416	-10.8124	-10.3937	-3.80387	-6.80144
200.8	-15.5777	-16.0624	-19.11	-9.81726	-8.99983	-3.26551	-5.90545
200.7	-14.8668	-14.869	-17.7999	-8.93529	-8.22777	-2.09506	-5.14769
200.6	-14.2145	-13.8396	-17.2283	-7.72129	-7.31135	-1.57413	-4.03634
200.5	-13.335	-12.6931	-15.554	-6.78296	-5.99299	-1.08958	-2.99925
200.4	-12.009	-11.9826	-15.4737	-6.03416	-4.53113	-0.529373	-2.26008
200.3	-11.293	-11.2565	-14.2669	-5.37137	-3.43591	-0.727705	-1.07257
200.2	-9.95666	-9.89786	-13.4733	-4.2691	-1.95378	0.303004	-0.030146
200.1	-9.56854	-8.81778	-13.4314	-3.57819	-0.878212	1.40149	0.779519
200	-7.75017	-8.1318	-12.0036	-1.87773	0.429409	2.49024	1.46403
199.9	-5.89752	-6.99155	-10.6925	-0.513575	1.90694	3.38769	3.66234
199.8	-4.1844	-6.67206	-9.40449	0.810581	3.70336	4.24503	3.7239
199.7	-2.5254	-6.46078	-8.30842	2.33906	5.12914	4.78266	4.68287
199.6	-1.51918	-5.56114	-6.89201	3.75779	6.87865	5.87387	5.56529
199.5	-0.257889	-4.48786	-5.81055	4.71118	8.77289	7.25784	6.3476
199.4	1.25921	-4.44213	-4.42406	6.36998	9.8865	8.21769	7.55434
199.3	1.77339	-3.31251	-3.10882	7.43561	9.84439	8.64099	9.1704
199.2	2.99629	-2.83328	-2.32714	8.46747	11.0001	8.96145	10.7901
199.1	3.80718	-1.60408	-1.03007	9.46805	12.2184	10.4516	12.21
199	4.45427	0.402596	-0.616143	10.7184	13.3336	10.773	14.1681
198.9	4.76789	1.44081	0.51153	12.0309	13.6072	11.6329	16.1435
198.8	6.56998	2.76115	1.93198	12.8389	13.8167	12.6754	17.1892
198.7	8.28199	4.3526	2.70207	14.6061	15.133	13.4779	18.8484
198.6	9.13274	5.57836	3.94584	15.4277	16.21	14.756	20.0827
198.5	11.7013	6.79536	7.14217	17.3215	18.7307	16.7376	21.8978
198.4	13.3737	8.54987	9.24843	18.835	19.9761	17.6558	22.0093
198.3	14.7453	9.95026	9.32166	20.7377	20.5817	18.9689	22.6252
198.2	16.2542	11.3414	10.1165	22.3439	21.2664	19.7128	22.6802
198.1	16.8808	12.0318	11.7918	24.0492	23.5816	20.5431	24.0828
198	18.736	13.2804	15.0066	25.9866	25.3478	21.1398	25.8351
197.9	20.3699	14.5936	15.6681	27.1645	26.5962	22.025	27.6524
197.8	21.4062	16.4918	15.922	27.7416	27.9253	22.5041	28.8107
197.7	22.8274	17.3821	16.2786	29.097	29.2317	23.0216	29.9135
197.6	24.6824	18.7474	17.4614	30.1752	30.4764	24.3911	31.5964
197.5	26.6854	20.4375	20.1958	31.8783	33.4666	25.4306	34.0946
197.4	29.3423	22.0786	22.5926	33.4643	35.5907	26.7422	35.2511
197.3	30.0768	24.022	23.1341	34.349	36.8251	28.186	35.5812
197.2	31.78	24.1102	24.4482	36.4975	37.4552	29.0398	35.4482
197.1	33.8539	25.5728	26.1832	39.6908	39.7716	29.8083	35.2861
197	35.3218	26.8521	28.9563	41.3224	40.9947	31.0383	36.5919
196.9	36.1036	27.593	30.829	43.4786	42.7272	31.4949	37.8027
196.8	37.7509	27.977	30.5244	44.4501	43.5289	32.6993	39.0262
196.7	37.9332	28.7325	31.3005	45.3571	43.5131	33.7677	40.2177
196.6	39.2866	29.2613	33.2958	47.0827	45.7238	34.4559	42.4709
196.5	40.7579	31.626	35.0945	49.2974	48.0248	35.1265	45.3776
196.4	41.148	32.3471	38.3432	50.372	48.5025	36.2069	46.4356
196.3	43.3813	33.812	40.8793	52.1791	48.9147	36.9947	47.5888
196.2	44.994	34.5766	39.7052	53.9277	48.7955	37.3475	48.8473
196.1	46.3061	36.3828	40.8429	54.4327	50.5691	38.423	49.1524
196	47.4723	38.8758	42.4628	55.4753	52.3435	39.0852	49.7123
195.9	49.64	40.8144	43.1793	57.0316	53.569	39.817	49.1427
195.8	51.9626	41.9896	43.8478	58.5708	55.1277	41.4269	48.4518
195.7	53.9342	43.4563	41.2659	60.1893	55.3913	42.4514	49.604
195.6	54.3777	44.2535	40.3989	60.7579	56.6925	43.1646	50.248
195.5	55.1551	46.6802	41.1193	60.9625	57.5121	43.6452	51.0543
195.4	55.3361	47.1446	42.25	63.0312	57.1815	44.0999	50.5675
195.3	55.7814	46.8274	42.5859	64.4326	58.6554	44.4374	51.2465
195.2	56.4315	46.5834	42.8672	64.7893	57.3742	45.5151	53.9367
195.1	56.4855	49.0427	41.882	64.7274	57.0159	45.3216	55.4791
195	55.1808	49.751	42.3989	64.4085	58.7844	45.5481	54.6493
194.9	57.2661	50.2941	42.0554	64.8473	59.729	46.0104	56.9558
194.8	57.2272	48.8394	43.3917	65.4989	59.439	47.0206	57.1163
194.7	59.8826	50.1599	43.1477	65.822	59.1868	47.1623	59.5911
194.6	60.8014	50.4896	42.9082	66.7846	58.6912	47.4881	60.2251
194.5	62.1957	50.5522	42.1528	67.9556	60.7568	47.3023	58.9976
194.4	63.5763	51.9659	42.8792	69.5463	63.2329	46.9906	59.8529
194.3	66.0415	52.6002	44.7725	70.4614	64.1855	47.0766	60.0191
194.2	65.3253	52.4096	44.9309	69.136	64.7782	47.7564	57.8596
194.1	64.8304	53.6205	43.1829	69.1053	65.4887	47.881	57.4161
194	65.2253	52.9038	41.8242	69.7681	65.726	49.1312	56.8379
193.9	64.6728	52.967	43.1023	69.9498	64.8517	48.8416	57.9309
193.8	64.5536	53.623	43.347	68.5121	64.2351	50.2072	58.3854
193.7	63.781	54.2139	44.1959	66.5869	62.2274	50.9882	59.7078
193.6	63.3423	55.4363	45.4986	68.9248	61.5704	52.016	61.5571
193.5	63.4458	55.8507	45.5907	69.0926	63.0595	52.3071	63.355
193.4	62.3375	58.1338	47.7417	69.4083	65.4876	52.4072	63.0352
193.3	60.7592	58.3546	47.9372	68.9259	64.1556	53.8632	63.3192
193.2	61.3169	59.292	49.4135	69.6601	64.65	53.9248	64.4656
193.1	60.1732	58.0878	48.0737	70.2021	65.8619	55.2654	63.3382
193	61.5506	57.5896	46.2204	70.9007	65.9905	55.1923	62.4188
192.9	57.4602	57.936	45.84	72.4324	64.587	55.8092	63.3315
192.8	59.0072	56.7727	45.3164	74.1563	63.2627	55.9743	63.1977
192.7	55.1874	57.5576	44.7204	74.1703	64.5514	55.7376	61.8457
192.6	57.9391	56.9031	41.3934	74.2508	63.8814	56.1543	62.3167
192.5	56.9859	56.6455	40.3314	76.3629	62.5878	56.1513	63.9438
192.4	57.581	56.101	38.0829	76.9179	63.3676	56.8848	63.8327
192.3	57.4373	56.9747	38.0938	75.734	63.0097	57.8255	64.6613
192.2	60.5765	57.0279	38.553	74.5632	64.9353	58.4581	64.6296
192.1	63.0796	56.9149	39.6045	73.0763	64.8824	58.9928	63.3516
192	64.7653	55.5823	39.6778	74.033	66.377	58.9496	64.2189
191.9	62.019	55.4495	40.3645	73.2509	66.0777	59.8361	61.3863
191.8	60.8103	55.4652	40.6707	71.0439	66.9537	59.6627	58.7932
191.7	59.5442	55.3045	40.3473	72.2275	65.7314	59.4155	57.6318
191.6	58.644	53.8648	39.9496	71.7051	64.0229	58.2251	54.5006
191.5	56.7153	53.2975	39.5828	70.3983	60.2108	58.0262	54.9315
191.4	55.4839	54.1552	37.5706	68.3998	58.5458	57.5582	53.4576
191.3	56.3704	54.9695	37.0066	69.1005	59.2301	56.5536	55.5008
191.2	56.4021	54.6346	35.7659	67.3451	57.6831	56.3006	55.4351
191.1	56.6326	55.8345	34.2476	68.0608	58.5136	55.5999	58.9924
191	57.8028	57.2382	35.96	67.8909	57.5432	56.0491	60.4392
190.9	55.9438	57.0918	32.65	69.1812	57.5179	55.6659	59.9463
190.8	55.1032	56.9037	33.142	71.6376	57.7068	56.1901	60.9962
190.7	56.0801	54.3114	32.565	68.9388	54.9839	56.7499	58.3024
190.6	53.6014	50.6273	33.6628	68.4903	54.075	57.4111	57.3925
190.5	53.6745	51.121	34.3941	66.6348	52.4096	56.8249	55.729
190.4	51.8752	50.0537	34.4308	64.6073	53.1513	56.6895	51.8001
190.3	52.304	48.5818	34.5883	64.8346	54.4516	56.9846	52.4355
190.2	53.7102	47.2959	38.5428	62.589	56.4224	57.7016	50.5972
190.1	51.6668	49.2829	38.2991	63.4806	55.4786	56.2164	49.6132
190	51.0808	50.3004	37.1271	63.0915	52.0326	55.2969	48.4605
