# Supplementary material for: Dissecting the phase separation and oligomerization activities of the carboxysome positioning protein McdB
Source: eLife journal article supplement (doi:10.7554/elife.81362), 2023-09-05
Supplement: supp [file Figure 8-figure supplement 1-source data 1.xlsx]

## Sheet: foci per micron
WT	McdB[-3]	∆McdA	∆McdA + McdB[-3]
0.908449	1.25898	0.591359	1.17456
1.71725	1.0805	0.738947	0.810355
1.56792	1.91381	1.36761	0.579523
1.80386	0.662558	0.589802	0.921644
1.27366	1.3349	1.03545	1.40039
0.911266	0.720399	0.643364	0.64271
1.76611	0.562113	0.918127	0.961741
1.62466	0.880871	2.00066	0.767502
1.48022	1.20446	0.526995	0.492506
1.29678	0.948513	1.06554	0.861831
1.36172	1.16911	1.12012	1.18748
2.01322	0.869918	1.06369	0.315855
1.01929	0.835751	1.04871	0.958251
1.84761	0.98722	1.27283	0.86177
0.781415	0.434085	0.712114	0.835592
1.034	0.495621	0.863046	0.552065
1.12206	0.768236	1.47285	0.927775
1.58218	0.361697	0.771692	1.51733
1.97388	0.79289	0.86618	0.781825
2.19304	0.510169	0.76595	1.51674
1.58734	1.06254	0.92768	0.958659
1.3999	1.12418	0.609573	1.67631
2.34391	0.788455	0.644923	0.835109
1.81284	0.801304	1.05194	1.41196
1.17303	0.807949	1.06497	0.347892
1.96782	0.889562	0.763939	0.993244
2.66607	1.42326	1.42752	1.06792
1.38845	1.21154	1.1768	1.07338
1.84482	0.599547	0.960314	1.21643
1.67105	0.725848	0.837033	0.97287
1.8391	1.26008	1.19701	1.04103
1.82732	0.723575	0.86521	1.02376
0.973104	0.67682	1.30927	1.07451
2.09855	1.18176	0.897094	1.22499
1.91949	0.813379	0.686046	0.831835
2.09223	0.745565	1.47513	1.04138
1.78359	0.947502	1.11657	1.87819
0.964088	1.31098	1.1478	1.93058
2.16048	1.315	0.816793	1.47059
2.00165	1.15648	1.47627	0.786113
1.56937	1.051	0.584018	1.90753
1.60831	1.05508	1.39868	2.15389
1.01835	1.17674	0.939778	1.55903
2.15206	0.869929	1.19419	0.859669
1.33647	1.43875	1.67045	0.922188
1.75832	1.00637	1.07092	0.813382
1.80699	1.18129	0.89362	1.09234
1.46797	0.472056	1.20297	1.64296
1.90801	1.53139	1.86958	0.96721
1.83214	1.08234	1.01285	1.59303
2.50452	0.836908	2.08003	0.90747
1.29921	0.827401	0.394678	0.890304
1.54276	0.437283	1.47493	1.66795
1.68646	0.726397	1.5359	1.53201
1.52688	1.09171	0.814817	1.66088
1.56705	0.958337	0.61713	0.745183
1.51624	1.00792	1.13984	1.1198
2.35	0.363658	0.967527	1.09504
1.75609	0.630632	0.907806	1.08136
1.81164	0.448562	1.47216	1.46765
1.75937	0.983709	1.27353	1.43394
1.58223	0.679316	1.29289	1.37735
1.26895	0.506427	1.92882	1.30577
1.61975	0.833895	1.00714	0.875503
1.20561	1.31343	1.5607	1.10433
1.47971	0.864025	0.947369	1.18589
1.66799	0.90367	1.54805	0.868056
1.30389	0.982253	0.928355	1.28347
1.8302	1.02554	1.03926	1.22008
1.78865	0.737882	1.20286	1.44156
1.39304	1.06579	1.1051	1.60173
1.81155	1.09979	0.8318	0.769075
1.49581	2.09639	1.30455	0.689025
1.93251	0.606931	1.06887	1.5355
1.98648	0.859343	1.73336	1.01468
2.16161	0.802914	1.30594	1.7229
1.83813	1.15507	2.07613	1.14431
1.99748	0.857928	1.8357	1.73517
1.55347	0.659062	1.54989	1.36129
2.01483	0.923165	1.48173	1.3268
1.59292	0.37167	1.72033	1.65615
1.77596	1.34483	1.07354	1.31061
2.04308	0.991503	0.975854	0.741161
1.7715	0.760954	1.59954	1.06942
1.38388	1.27149	0.82473	1.21106
1.91223	1.13799	2.22642	1.24212
2.13942	0.821163	1.38742	1.37084
1.94246	0.638955	1.26165	0.889514
1.45093	0.905346	1.19363	1.90584
1.30287	1.4876	1.06259	1.91171
2.10306	0.726121	1.41083	1.07846
1.52412	0.75806	1.34545	0.749131
1.18925	1.24696	2.07329	0.990031
1.58552	1.19757	1.35081	1.87043
1.8271	0.641365	0.951658	1.65593
1.78553	0.7221	1.18859	1.37665
1.33184	0.602395	1.48422	1.16954
1.71929	0.963351	1.17969	0.776287
2.03707	1.42343	0.878252	1.6156
1.82811	0.993638	1.26001	1.10822
1.70914	1.35193	0.721325	1.03776
1.38098	1.63569	1.19105	1.4622
1.93579	1.53976	0.986601	0.489896
1.74787	0.680988	1.20658	1.9134
2.17387	1.49502	0.778419	1.32684
1.99938	1.49585	0.906882	1.40441
2.25401	1.33018	1.38095	1.46396
2.08142	0.611306	0.966956	0.831537
1.75748	0.699071	1.89474	1.07029
2.0069	0.441748	1.27046	1.22818
1.95204	0.685585	0.718259	0.441317
1.24364	0.79925	1.29884	1.17468
1.89114	1.00254	1.0127	0.812056
2.10105	1.09546	1.03332	0.8004
1.35433	0.399993	1.23675	1.27101
1.11995	1.30619	1.01017	1.25324
2.01231	1.42472	1.52782	1.67548
2.43074	0.500009	1.63204	1.36639
1.57065	0.659001	1.20877	1.43932
1.78042	0.701799	1.07145	0.953981
1.27974	1.36403	1.04303	1.15315
1.64565	1.26455	2.06395	0.403248
2.08845	0.92177	0.826811	1.57256
1.71567	0.592522	1.23478	1.11106
1.6913	0.971397	0.860861	1.07589
1.87836	1.21638	0.968748	1.55713
1.44517	0.984652	1.23238	0.973463
1.80448	1.04902	0.680502	1.94031
1.63582	0.497843	1.39161	1.36757
1.69187	0.551551	0.847487	0.998394
1.63583	0.980356	0.348939	0.994134
1.79025	0.77652	1.06297	0.88697
2.18303	0.994854	1.17223	1.51788
1.37791	1.02502	1.13155	2.32451
1.46341	0.345482	1.59531	1.07727
1.71255	0.68532	0.921467	0.890741
1.12456	0.568484	1.18471	0.928515
1.35236	0.831361	1.36532	0.771974
1.66588	1.05048	0.810638	1.06362
2.20566	0.781537	1.5264	1.45953
1.98099	1.48414	1.01358	1.14278
0.886704	0.636213	1.82031	0.648777
1.83947	0.793684	0.722098	1.07019
1.38053	0.821053	1.68269	1.09053
1.77203	0.523572	1.24026	0.923325
2.16365	0.541629	0.661298	1.0466
2.43621	1.17991	0.895393	0.651415
1.41686	0.681841	0.493483	0.707069
1.85468	0.804185	1.09268	0.735925
1.81665	0.542222	0.833171	0.761459
1.6779	1.27907	1.28611	1.11031
1.82552	0.634025	1.04646	1.58448
2.46975	0.608612	1.67874	1.62776
1.52496	1.01307	0.950758	2.3141
1.57005	1.13836	1.1459	1.13957
2.18743	1.0977	0.499155	1.10531
1.81846	0.942469	0.69684	1.30296
1.64047	0.719272	1.43763	0.784776
2.06622	1.01848	1.19301	1.10405
1.39359	0.726185	0.955057	1.54795
2.07212	1.53162	0.860443	1.65416
1.90865	0.722739	1.29657	2.07446
2.63416	0.797537	0.946286	1.20102
2.03327	1.41026	1.39979	2.33614
2.11574	1.05073	0.938148	1.85421
1.934	0.542865	0.628111	1.10545
1.79156	0.590909	1.48498	1.14263
1.58406	1.39652	1.11941	2.11782
1.58011	1.51252	0.939662	1.27351
1.26707	0.47472	1.0924	0.904374
2.01257	0.599589	1.21569	1.72659
1.83813	0.376309	1.57836	1.94738
2.68511	0.705075	0.715609	1.5617
1.71231	1.32975	1.55327	1.56658
1.08492	1.89323	1.17683	0.621935
2.56279	1.04488	0.58715	1.09718
1.52532	1.38616	1.67487	1.75093
1.43268	1.09019	1.69829	1.25306
2.09329	0.337282	1.39922	1.96255
2.13714	1.08959	1.45006	1.10532
0.988963	0.403667	1.07684	1.28351
1.86797	0.992904	0.934846	1.36757
1.64805	1.05831	0.407503	1.13879
1.81068	0.661064	0.694412	1.1152
1.50214	0.647024	0.713342	0.556406
0.68813	0.856411	0.924182	1.28105
2.18709	1.20365	1.45011	0.764072
1.3872	1.04301	0.973169	1.41056
1.76444	1.59995	0.794233	1.66367
2.09908	0.654456	1.5428	1.50902
1.55716	1.02587	1.40499	1.09164
1.77605	2.11092	0.594999	1.53659
2.02811	1.20286	1.19532	1.52392
2.46304	0.855865	0.818747	1.96678
2.09358	0.353015	0.833226	1.32777
1.85912	1.01312	0.47067	0.795185
1.85592	1.44103	0.616476	1.30965
1.5498	0.63063	1.24611	1.47573
1.49097	0.667107	1.26622	1.13812
1.86403	0.641448	0.98308	1.72668
1.93231	0.777356	1.08642	1.35614
1.80945	0.851892	1.55289	0.767279
2.004	0.627101	0.901512	1.29406
2.08635	1.1662	1.44608	1.6845
2.08539	0.812985	1.28176	2.07296
1.98487	0.912543	1.0325	1.40977
1.60781	0.870378	2.20376	1.34676
1.51773	0.945457	1.2266	1.12139
2.6541	1.06599	1.71879	1.21954
1.49924	0.495072	1.31999	1.06925
1.36831	1.50837	1.33308	0.979365
1.95675	1.15783	1.12121	0.410894
2.19167	0.753211	1.0846	0.933844
1.70624	1.53981	1.13725	0.749733
2.16112	0.555195	0.752812	0.737371
2.56713	0.701835	0.997975	1.17182
1.2906	0.640093	1.69034	1.93203
1.52493	0.734542	1.3625	0.627162
1.32766	0.611032	1.45868	1.3607
1.45478	0.956686	1.14959	1.40045
1.40809	0.493244	0.84105	1.894
1.1677	0.379857	1.49687	0.898568
1.50611	0.663214	1.75304	1.15646
1.95868	0.552001	0.754702	1.49138
1.57366	0.83132	1.24315	1.27468
2.2364	0.60282	0.964124	0.93541
2.89665	0.78609	0.755228	1.68697
1.50119	0.603931	1.16044	1.72832
1.74412	0.837192	1.22878	1.59984
2.09959	1.07415	0.356304	1.30448
2.13119	1.03414	0.878439	1.41956
1.56237	0.699015	2.10198	0.739558
2.15283	0.717337	1.82074	0.976649
1.8338	0.819557	1.11694	1.4496
1.96203	0.406025	1.36522	1.18579
1.74692	0.549774	1.26542	1.91257
1.95998	0.305705	1.90639	1.04368
1.86299	0.634668	0.917042	0.752459
1.76383	1.24835	0.976594	1.29635
1.87651	0.701402	1.44053	1.15002
1.75426	1.188	1.15435	1.78476
1.65776	0.699936	1.18755	1.40031
1.6617	0.634224	1.02374	1.39163
1.59808	0.72721	0.667551	1.67882
1.51285	0.355016	1.58467	0.872268
1.81209	0.548458	1.77554	1.27278
1.90321	0.44085	0.902545	1.43627
2.08351	0.620778	1.97486	0.935298
1.6805	1.46536	0.88537	1.10204
1.68791	0.891355	0.668671	0.695392
1.7067	0.747732	1.55086	1.58429
2.25415	0.834181	1.29135	1.44261
1.50577	0.578344	1.00157	0.738701
1.32576	0.850531	0.95524	1.34598
1.28736	0.763035	1.46676	1.57153
1.79471	0.454508	1.27818	1.01032
2.02442	1.10581	1.21621	2.0992
1.45068	1.28519	1.68891	1.78842
2.41034	0.974117	0.830994	1.09331
1.93366	0.749738	1.47285	0.669531
1.55191	1.51455	1.30033	1.1547
2.40396	1.0929	1.28121	0.936067
1.77497	0.324894	1.26246	1.53585
1.44099	0.842612	0.343487	2.15083
1.43424	0.390022	0.913667	1.21096
2.11321	0.295739	0.833112	0.949332
1.78569	0.775905	0.975744	0.758436
1.45628	0.67313	1.31806	1.55773
1.14419	1.4751	1.19185	1.77011
2.0368	0.800629	1.22918	1.60427
1.35463	1.67577	0.743791	1.09067
2.09336	0.798864	1.20358	1.23892
2.021	0.488253	1.36788	0.927389
2.23944	0.80814	1.44686	2.00571
2.0404	0.340358	1.41089	1.60901
1.58156	0.501632	0.550828	2.18434
1.73166	0.463455	1.57567	1.36014
2.44187	1.01929	1.29627	1.86957
2.2102	0.501104	1.83592	1.47759
2.00913	0.749823	0.98187	1.94175
1.64309	0.638889	1.55194	1.18284
1.92454	0.905416	1.29294	0.90805
1.47766	1.10647	1.7002	1.11117
1.89557	1.23159	0.922573	1.8797
1.28265	0.995172	1.30835	1.79029
1.52923	0.809436	1.05058	1.38388
1.87962	1.44918	1.18094	1.03806
1.78864	1.58913	1.52855	1.74984
2.22419	0.693638	1.57378	1.22634
1.62232	1.26787	0.96013	2.24784
2.0801	0.902929	0.730712	1.35783
1.58552	0.627107	0.6483	1.07203
1.50131	1.75382	1.07759	1.37286
1.43239	0.4213	0.989389	1.71418
1.83678	0.981116	0.656929	0.92205
1.93554	0.808527	1.02872	1.60443
1.61052	0.643895	1.34781	0.768488
1.92857	0.322254	0.976954	0.715591
1.92094	0.868161	0.941819	1.34191
1.44844	0.706418	0.919721	1.87282
1.51853	1.46123	1.1452	0.647111
1.94962	0.443047	1.75079	0.741259
1.61392	1.46046	0.767458	1.18827
1.33878	0.343757	0.937294	0
1.68385	0.615821	0.934293	1.03127
1.72055	1.06906	0.309405	0.744794
1.98404	1.05531	0.695282	0.925636
1.47569	1.26003	0.3303	0.329656
2.03804	0.938056	1.31112	1.00344
1.61364	0.33699	1.23434	0.38125
2.0081	0	1.34436	0.751842
1.76879	0.633612	1.46375	1.21171
1.76608	1.16979	0.967467	0.810018
1.3847	0.354624	1.11226	1.01385
2.10116	1.31655	1.09314	1.3893
1.99032	0.947867	1.29804	0.351509
1.56594	1.17943	0.696329	1.65976
1.92004	0.890531	1.18354	0.85382
2.05201	0.977771	0.694315	0.622407
1.60811	0.403816	0.852867	1.17539
1.4945	1.06852	1.17757	0.722953
2.14008	0.847023	1.62425	0.664295
1.3204	1.38111	1.77141	0.743118
1.37934	1.22509	0.942353	1.06929
2.06236	0.338648	0.955623	0.66595
2.00196	1.43714	0.343928	1.93896
1.96153	0.670843	1.08223	0.83066
1.4184	0.352968	1.3646	1.02969
1.90391	0.779607	0.703932	0.905666
1.5655	1.09447	0.347052	0.762212
2.26803	0.670487	0.686613	1.19873
2.15682	0.412131	1.66235	0.872494
1.52224	1.47042	1.26863	0.345035
1.69606	0.69125	1.70796	1.08715
2.08353	0.889384	2.23704	1.52899
1.69808	0.691494	0.890089	1.33893
1.70038	0.60052	0.78875	1.91697
1.97709	1.10647	1.21183	0.861889
2.17899	0.75522	0.565954	1.33464
1.7243	0.833927	1.55803	1.63086
1.70654	0.913766	1.20049	1.01452
1.6769	0.626858	2.04705	0.615554
1.91386	0.459676	1.04004	0.368465
1.04165	0.848364	1.23478	1.15613
1.9427	0.956548	1.71921	0.499476
1.99747	0.752713	0.734843	0.913678
2.16685	1.01022	1.02139	2.91218
1.79352	0.771698	1.66044	0.677552
2.12374	0.432888	1.13218	0.647882
2.06317	1.00113	1.22187	1.1029
2.03633	0.838931	1.36406	0.987105
1.29822	0.850889	1.12641	1.79892
2.26238	0.84489	0.936865	1.30573
0.989031	1.14788	0.753393	1.02083
1.48147	1.08815	0.78067	0.630392
1.87092	1.09577	1.45285	0.975604
1.89311	0.701646	1.36024	1.08304
2.95071	1.01256	1.22444	1.22198
1.74749	1.00595	1.34662	0.969303
2.00473	0.955416	1.45525	1.55084
2.25545	0.627766	0.928896	1.04055
1.98403	0.283898	1.14441	1.09053
1.70205	0.755698	0.738249	0.76866
1.36948	0.646116	0.678781	0.899838
2.00273	0.958433	1.47803	1.32858
2.4714	0.812973	1.93837	0.88905
1.68227	1.03549	1.36091	1.1255
1.87164	0.483282	1.593	1.05867
1.63065	0.323915	1.35167	1.47502
2.34166	0.695508	1.13243	1.18801
1.97008	0.776768	1.12157	1.03765
2.23452	0.710065	1.54189	1.06786
2.158	1.11867	2.00273	2.07833
1.07285	0.725069	2.30933	1.52275
1.49262	1.14045	1.34362	1.2437
1.88603	0.614729	0.867858	1.15369
1.90107	0.76452	1.06481	1.12059
1.78205	0.408923	1.15707	0.67453
2.0687	0.717798	1.3784	1.05129
1.9715	0.693888	1.61773	0
1.95742	0.609829	0.708443	1.48303
1.80837	0.749	1.18226	0.775265
2.21595	0.598435	0.720004	1.19682
1.57612	0.750038	1.95412	0.867619
1.77011	0.726478	1.07551	0.978803
1.8648	0.749726	0.566406	1.31676
1.59374	0.831051	0.614463	0.472763
2.19492	1.26204	1.22852	1.44624
1.05065	1.2043	1.45137	1.10515
2.19314	0.409466	0.741582	0.649056
1.75022	0.638712	0.831092	1.36775
1.99661	0.837863	1.61506	0.606829
2.1486	0.709956	1.1482	0.660069
1.69117	0.900287	0.88756	1.19052
1.76893	0.718751	1.99943	0.822798
1.63131	0.926292	1.47217	1.0797
1.57749	0.526171	0.915798	0.466495
2.68846	1.16768	1.13978	1.10684
1.84576	1.22854	1.53113	0.361306
1.81013	0.56093	1.13341	1.40291
1.08785	0.848528	1.40405	0.993676
1.33942	0.435371	2.03791	1.68031
1.66486	0.711938	0.817992	1.54038
1.77971	0.624639	1.89473	1.01764
1.97517	0.915237	2.19828	1.18326
1.96333	0.86463	0.981462	1.25356
0.669863	0.408865	1.52329	1.45047
0.9325	0.668776	0.88849	1.40747
1.80101	0.898862	1.21154	0.537149
1.30038	0.493996	1.06708	0.720105
1.64634	0.370616	0.891723	1.06763
1.22652	0.347448	1.23146	1.62283
0.721221	0.779046	1.02973	0.748014
1.9422	0.886933	1.25475	0.979257
1.54341	0.985729	0.893569	0.904522
1.40308	0.510493	1.62263	1.26951
2.31069	0.329571	0.831019	1.1278
1.02392	1.10587	1.29557	0.348012
1.68906	0.601503	1.23124	0.662189
1.50361	0.446052	0.897639	1.56223
2.07898	0.376523	1.34526	1.59253
2.6944	0.341201	0.690573	1.25519
1.73224	0.923582	1.35519	1.7187
2.2328	1.07241	0.680487	0.9153
2.43042	0.287489	0.815812	0.948021
1.27979	0.376447	1.57654	1.28879
1.43258	1.66081	1.72828	1.52673
1.37068	1.00586	0.70614	0.813342
2.20821	0.722965	1.36066	1.26323
1.56873	0.493981	1.37034	0.928265
1.46065	0.927837	0.9257	1.21111
1.73159	0.656189	0.989395	1.0797
1.95847	1.27698	2.45213	1.29198
1.39312	0.9151	1.38138	0.899908
1.51922	0.382005	0.859219	0.884697
1.91585	0.362973	0.701811	2.20199
2.24258	0.426571	0.799876	1.3336
2.09326	0.556389	0.378459	1.81179
1.11525	0.898649	1.1945	0.890535
1.77099	1.06638	1.194	0.315233
2.39917	0.374523	1.39648	1.13229
1.26068	0.57576	1.37196	1.26986
1.53588	0.327414	1.48474	1.36431
2.07847	0.286607	0.920643	1.68954
1.5983	1.41338	1.03629	0.858265
1.96993	0.737982	1.23353	1.40645
2.01898	0.851317	1.00019	1.22002
1.79449	0.633807	1.01008	1.21706
1.65664	0.623521	0.939599	1.08339
2.02948	0.911029	0.971817	1.17619
1.46432	1.22052	1.00539	1.14382
1.83275	0.753556	0.894219	0.87148
1.57066	0.91407	0.995589	1.60843
1.38557	0.836982	0.94935	1.29219
2.33052	0.883462	2.43903	0.815625
2.23145	0.590081	0.9512	1.2023
1.90419	1.24313	1.65736	1.17295
2.17197	0.625798	1.49	0.95736
2.69221	0.42934	1.69493	1.56368
1.62023	0.891731	0.550452	1.16211
1.96138	0.758156	0.920221	0.953777
1.60935	0.558747	1.54858	0.706172
1.97223	0.706549	0.760954	1.37464
2.17389	1.29045	0.94137	0.775932
1.84872	0.390161	1.96775	1.12374
1.61307	1.42368	1.04543	1.37685
2.17219	0.446792	0.715862	1.29877
1.91407	1.13026	1.30098	1.34696
1.7346	0.652036	1.29221	1.33415
1.19363	1.01643	1.28879	0.44751
1.75884	0.524879	0.716075	0.938228
1.23291	1.46821	1.10875	1.54098
1.71143	0.474766	1.28776	1.29732
1.79459	0.669328	1.7186	0.955376
1.70225	0.35819	1.59859	0.356347
2.0089	0.829987	0.889172	2.09867
2.43121	1.33941	1.88396	1.1137
1.92655	0.912198	1.04118	1.35057
2.66663	1.2063	0.696523	1.34216
1.6163	1.38317	2.16887	1.13871
1.58895	0.745152	1.26244	0.923617
1.50626	0.669646	1.52024	0.794846
2.08844	1.1179	1.1423	1.07032
1.97133	0.852343	0.85764	1.16016
1.83919	1.65743	0.328043	0.690119
1.88175	0.951519	0.97795	1.2476
1.46202	0.746628	1.33339	1.20407
2.48557	1.00592	1.51406	0.705579
1.28172	1.09869	1.40028	1.26815
2.38706	0.335749	1.32951	1.36299
2.07698	0.915042	1.23856	1.55111
2.36547	0.671787	1.40495	1.07248
2.23435	1.35583	1.38437	0.999717
1.95732	1.08585	1.11366	2.03352
2.26492	1.15225	1.52129	0.788373
1.36438	0.776221	1.84411	0.727672
1.26206	0.821188	1.18851	1.16276
1.78645	1.23276	1.60029	1.30574
1.96374	0.961856	1.54555	1.059
1.88509	0.400018	1.72655	1.82904
1.69903	1.45238	1.30525	1.02591
1.59751	0.724598	1.62981	1.24914
1.74099	0.879453	1.94266	0.500637
1.75609	0.722927	1.10728	0.919565
1.55723	1.49854	1.12358	1.74593
1.32333	1.31303	1.02098	1.16697
1.84784	0.847244	1.55886	1.59419
1.63107	0.663628	1.31612	1.68645
1.82665	0.543535	1.64815	1.70009
2.18896	1.04406	0.872211	1.25921
1.99546	1.04611	0.946615	1.53873
1.38159	1.52457	1.07553	1.20091
1.71294	0.728759	0.38378	0.987692
2.04459	0.887316	1.37881	0.734127
1.32379	0.907038	0.780499	1.16242
1.97253	0.733231	2.04253	1.16827
1.76117	0.635222	1.17651	1.14283
1.70537	0.632319	1.54024	1.3945
1.68483	0.962908	1.07956	1.88696
2.35652	0.759473	1.71184	1.33692
1.67341	0.735214	0.568873	1.58362
1.48548	1.17896	0.721015	0.995291
1.81502	1.47321	0.816759	1.5732
2.8957	0.738823	2.83543	1.13663
1.32389	1.22536	1.36342	1.29943
1.42524	0.925311	1.10538	0.815783
1.75054	1.11161	1.73766	1.7574
1.75395	0.997274	1.64372	1.23941
2.7452	1.13132	1.30796	1.43851
1.77245	0.940214	1.33955	1.6936
1.3954	0.346648	1.70514	1.65869
2.11054	0.868487	0.754646	1.38764
2.59415	0.500889	1.63002	0.944948
1.27848	0.834536	1.48964	1.43607
1.962	0.41514	1.44034	1.41067
2.34047	0.651106	0.775464	1.3864
2.41715	0.944266	0.834152	1.01995
2.239	0.87408	1.20947	1.24503
2.44509	0.853106	0.933992	1.45808
1.81943	0.921997	0.825063	1.54911
1.83692	0.411868	1.28455	1.21535
1.92765	0.602611	1.11318	0.401213
2.11631	1.1987	1.02417	1.56201
1.21124	0.617684	0.948912	0.677692
2.55896	1.04673	0.682965	1.45385
1.98799	0.934948	1.58668	1.3309
1.51832	1.46885	1.13093	1.01007
2.67082	1.26648	1.16918	0.992132
2.27891	0.801848	1.35244	1.32218
1.62624	1.07181	0.414651	0.744701
2.2768	0.70545	0.838028	0.938992
2.147	0.994671		1.05348
1.67604	0.737867		1.05948
2.06208	0.957262		2.0883
1.72779	0.578453		1.12039
1.29484	1.29337		1.4067
2.42237	0.669118		1.12129
2.14197	0.267311		1.14801
1.76912	0.340697		1.4303
1.87907	1.13007		1.40746
2.07221	0.80496		1.13976
1.8323	0.885393		1.24486
2.06297	1.05337		1.38127
2.56377	0.813661		1.47159
1.81399	0.70333		1.32314
1.74027	0.719231		0.937955
1.91207	0.956573		1.19746
1.90349	0.729556		2.08968
1.47589	1.09077		1.41184
2.46804	1.80005		1.93252
1.52725	1.32016		1.10447
1.66024	1.13365		1.20456
1.89422	0.796671		1.23097
2.28214	1.03843		1.05234
1.62341	0.631642		1.37962
2.01372	0.907304		0.588934
1.08981	0.947933		1.70463
1.77592	0.889609		1.33289
2.02571	1.14207		1.13976
2.31047	0.835213		0.976248
1.8228	0.398222		2.05728
2.35856	0.675097		1.23612
3.04542	0.92192		1.73662
2.05021	0.339921		1.44905
1.71012	1.06322		1.51694
1.30445	0.97272		1.27315
1.98643	1.20854		1.31858
1.5005	1.32052		1.69121
1.722	1.11223		1.20347
1.98962	1.64208		1.10595
1.65238	0.894988		1.39338
1.44464	0.755502		2.00116
1.55477	0.524941		1.50614
1.65695	1.6413		2.15153
1.4241	1.33613		0.558011
1.83561	1.83963		2.05962
2.09626	0.961729		1.05118
1.19625	1.05528		1.30654
1.31878	1.30991		1.19539
1.17666	1.18143		0.777729
1.63611	1.32916		0.85236
1.94313	1.66086		1.79202
2.26894	0.77097		1.66585
1.71556	0.71456		1.22667
2.04029	0.584196		1.40699
1.92869	0.572366		0.423517
2.61005	0.828126		1.99935
1.95527	0.965215		0.712789
1.35468	0.674109		1.98869
2.45873	1.23035		1.85588
1.85873	0.817965		1.25364
2.98378	0.32511		1.27494
1.92305	1.50659		1.18476
1.52195	0.933231
1.34388	0.742342
2.60366	1.11556
1.599	0.757009
2.04882	0.701047
1.55648	1.2209
1.97834	0.335866
1.84822	0.640419
1.36839	0.701249
1.776	0.660861
1.86403	0.648798
1.89144	0.968755
1.18618	0.67079
1.7463	0.603994
2.08589	0.863102
1.76057	0.678225
1.38859	1.45621
1.71523	1.79457
1.88377	0.640712
1.8208	0.713143
1.75027	1.02475
1.66006	0.431505
1.36352	0.676983
1.73681	0.672363
2.06659	0.979503
1.93838	1.40109
1.66263	1.81252
2.24139	0.486254
1.41137	1.19905
2.14846	1.01216
2.50393	1.01466
1.62975	1.913
1.35868	0.314514
1.29144	0.425646
1.45966	0.591326
2.02604	0.900417
1.79987	0.614346
2.21841	1.07987
2.44689	0.746854
2.50311	1.11235
1.28288	0.841642
1.6491	0.409611
1.7408	0.433476
2.51322	0.391068
	1.2
	0.938979
	1.62867
	0.86307
	0.418488
	1.1469
	1.14864
	0.920167
	0.677816
	1.65355
	1.10387
	0.706164
	0.936957
	0.419592
	0.797793
	0.357067
	0.688615
	0.912375
	0.489827
	0
	1.2175
	1.40973
	1.20597
	1.38107
	0.679283
	0.384593
	0.41428
	1.08966
	1.04341
	0.718527
	0.944417
	0.910686
	0.92939
	1.06479
	1.21755
	1.51203
	0.74327
	0.604794
	0.434734
	0.335803
	1.63938
	0.672714
	1.4212
	0.572813
	0.366214
	1.09412
	0.736175
	1.72674
	1.01035
	0.780805
	0.540496
	1.02124
	0.73639
	0.980854
	1.02491
	1.4957
	0.943922
	1.08137
	1.13459
	0.336706
	0.671151
	0.804014
	0.730189
	0.377312
	0.944891
	0.561351
	0.584318
	0.288066
	0.752065
	0.860675
	1.4997
	1.18258
	1.07019
	1.40667
	0.894018
	0.75788
	0.440301
	0.391956
	0.33318
	0.459492
	1.0988
	0.969798
	1.10125
	1.79393
	0.69529
	0.660246
	0.829592
	1.35052
	0.556952
	0.674599
	0.699417
	0.405422
	0.339437
	0.320103
	1.10281
	1.03111
	0.704896
	0.336452
	0.968394
	0.706285
	0.862791
	1.62355
	0.771592
	0.398537
	1.326
	1.11093
	0.697628
	1.46512
	1.3914
	0.429419
	0.334146
	0.340659
	0.79323
	0.781966
	0
	0.88028
	0.700674
	1.19316
	1.10957
	0.664672
	0.60914
	1.00858
	1.09481
	0.444584
	1.32914
	0.775894
	0.626111
	0.921726
	1.06599
	1.15796
	0.351402
	0.783947
	0.519345
	0.707374
	1.46369
	0.428592
	0.883705
	0.832872
	0.419616
	0.961931
	0.954839
	0.355368
	0.635235
	1.05766
	0.834203
	1.05728
	1.15066
	1.54855
	1.16024
	0.609757
	0.36168
	0.375826
	1.01952
	0.626879
	0.310858
	0.889329
	0.803955
	1.07183
	1.22353
	0.724511
	1.10553
	0.661542
	0.742005
	0.712085
	0.65019
	0.741043
	0
	1.57527
	0.347533
	0.941703
	0.741685
	0.361043
	0.638322
	0.953797
	0.946932
	0.974201
	1.45544
	0.790677
	1.20641
	0.873938
	0.770396
	1.25051
	0.949716
	0.723273
	1.28409
	1.06312
	0.531786
	0.710079
	1.03186
	1.27275
	0.465523
	1.15653
	1.25439
	1.2603
	0.28964
	0.97186
	1.02687
	0.605651
	0.8565
	0.816019
	0.406959
	1.05427
	1.07078
	1.22216
	0.988833
	0.645636
	0.65271
	0.628714
	1.11605
	0.344473
	1.24283
	0.794937
	0.734268
	0.303899
	0.374903
	1.19888
	0.51188
	0.818148
	0.900245
	1.00768
	1.03011
	0.490905
	0.970037
	0.589275
	0.535695
	0.884251
	0.536022
	0.752314
	0.798233
	1.32817
	0.36161
	1.37605
	1.23092
	0.686397
	0.391972
	0.61487
	0.454197
	0.681962
	0.353675
	0.422661
	0.694326
	0.57644
	1.08672
	0.919967
	0.674542
	0.688291
	0.930664
	1.03313
	0.835993
	0.770031
	1.17706
	1.08571
	0.918042
	1.14746
	0.848331
	0.401489
	0.425118
	0.532938
	1.15027
	0.885842
	1.12641
	0.695563
	0.970695
	1.00529
	0.66701
	1.13951
	1.15095
	0.249911
	1.02241
	0.72254
	0.709975
	0.703619
	0
	0.712747
	0.679014
	0.41507
	0.65322
	1.00126
	0.380815
	0.453463
	0.978885
	0.470659
	0.8752
	0.882759
	0.528631
	0.693807
	0.531141
	1.2481
	0.566699
	0.728033
	0.699198
	0.830574
	0.369707
	0.5222
	1.36586
	0.620181
	1.08109
	0.95299
	0.556962
	0.886708
	0.630774
	0.373272
	0.757885
	0.814831
	1.25117
	1.16292
	0.377361
	0.77475
	0.349187
	0.347264
	0.912935
	0.391271
	0.570924
	0.511509
	0.629732
	0.438534
	0.756317
	0.951865
	1.07524
	1.18467
	0.521649
	0.781433
	0.661778
	1.5829
	0.942657
	0.401933
	0.753013
	0.350081
	0.348572
	0.401932
	0.430173
	0.7668
	0.56339
	1.07613
	0.752037
	0.250349
	0.443285
	0.268775
	0.350187
	0.791864
	0.482149
	0.469828
	0.379784
	0.606503
	0.830136
	0.830136

## Sheet: foci per cell
WT	McdB[-3]	∆McdA	∆McdA + McdB[-3]
3	4	2	4
9	3	2	3
7	5	4	2
7	2	2	3
4	4	4	4
4	3	2	2
6	2	4	3
5	3	8	2
4	4	1	2
4	3	3	2
4	4	3	4
10	3	5	1
3	3	8	4
6	3	4	3
2	1	2	2
3	2	4	2
3	3	6	3
5	1	3	5
6	3	3	2
7	1	2	4
5	4	4	3
6	4	2	7
10	4	2	2
6	3	4	4
5	3	3	1
6	2	4	5
10	3	6	3
4	4	4	3
5	2	4	5
7	2	3	5
8	6	5	3
8	4	4	3
3	2	5	3
8	3	4	4
6	2	3	3
10	2	4	3
6	6	3	6
3	6	4	6
8	5	2	5
7	5	5	2
5	4	2	6
5	3	5	6
3	6	3	6
6	3	4	3
4	5	8	3
5	3	3	2
6	3	3	6
5	1	5	6
5	5	6	3
7	3	3	4
9	3	12	3
6	2	1	3
5	1	7	6
7	3	4	5
6	3	2	6
8	4	2	2
7	4	4	5
10	1	3	4
7	2	3	4
5	1	3	5
5	3	5	6
7	2	4	5
4	2	7	5
5	3	3	3
4	6	6	3
5	3	3	7
6	6	4	3
5	4	3	5
6	5	4	3
5	2	6	4
5	4	3	5
7	3	4	2
5	6	4	2
6	2	3	5
8	2	6	6
7	2	5	5
5	5	8	4
9	4	5	5
5	2	5	5
8	3	7	3
5	1	7	6
6	3	3	4
7	4	4	2
5	3	5	4
4	5	3	4
6	3	7	5
8	3	6	3
6	3	4	4
5	3	4	6
4	3	4	7
7	2	6	4
7	3	3	2
4	4	8	3
5	5	6	6
9	2	2	5
6	2	3	4
4	3	5	3
7	3	4	2
7	5	3	6
5	3	4	7
5	4	2	5
6	6	4	6
8	4	3	1
7	2	6	6
9	4	2	4
6	6	4	5
8	4	4	6
10	2	5	4
7	3	7	4
6	2	4	6
6	2	2	1
4	3	6	4
6	3	3	2
7	4	4	3
5	1	6	4
4	6	5	3
7	5	7	7
8	1	5	5
5	3	5	5
6	2	4	3
4	6	3	3
6	4	6	1
7	3	4	10
5	2	4	3
7	3	3	3
6	5	3	5
4	3	5	3
8	4	2	8
7	2	5	7
5	2	3	3
5	3	1	3
7	3	4	4
7	3	5	4
4	3	4	5
4	1	5	4
6	3	3	3
4	4	4	4
5	6	5	2
9	3	4	3
6	2	5	5
5	4	3	3
2	2	6	2
12	2	2	3
4	2	7	3
7	2	4	3
11	2	2	4
9	5	3	3
4	3	2	2
6	2	4	3
5	2	3	2
5	4	4	3
5	2	3	5
9	2	6	9
5	5	4	6
4	6	4	5
8	3	2	3
7	3	2	6
7	3	5	3
10	3	3	4
4	3	4	11
7	3	4	6
8	3	5	8
8	3	3	5
8	4	5	7
8	3	3	6
8	2	2	6
5	2	4	5
4	5	4	10
5	5	4	4
4	2	4	3
6	2	4	5
8	1	4	6
10	2	2	7
5	5	7	4
4	7	5	2
7	5	2	3
4	4	4	7
4	3	6	6
5	1	5	7
8	3	6	3
3	1	5	5
6	3	3	4
6	3	1	3
6	2	2	4
5	2	2	2
2	3	3	5
7	3	5	2
4	5	3	4
5	5	2	6
6	2	4	4
5	3	9	4
6	6	2	6
6	6	5	4
9	2	3	7
7	1	3	3
7	6	1	3
7	4	2	5
5	3	5	5
4	2	5	5
5	2	3	5
6	2	3	4
7	3	6	2
9	2	3	5
6	4	6	5
8	3	4	5
6	2	3	7
5	3	6	5
5	5	4	4
8	4	5	4
5	1	4	2
3	5	4	3
7	4	4	1
7	3	5	3
7	4	7	2
6	2	2	2
10	2	3	4
4	2	4	5
5	2	5	2
4	2	5	4
5	3	4	4
7	2	2	8
6	1	6	5
4	2	8	5
7	2	3	5
4	3	5	6
8	2	3	2
9	3	3	4
5	2	4	8
9	3	4	7
9	4	1	4
6	3	3	3
5	2	8	2
8	2	8	3
8	4	3	6
8	1	5	4
7	2	5	6
6	1	6	3
6	2	3	2
5	4	3	5
6	2	5	4
6	3	3	5
7	3	4	5
5	2	4	4
5	2	2	7
5	1	6	2
5	2	7	4
8	1	3	6
5	2	6	3
6	8	2	3
5	3	2	2
5	4	6	5
9	3	6	6
4	2	4	3
5	3	3	4
4	2	5	7
7	1	7	4
6	5	5	6
5	4	5	6
8	3	4	3
7	3	5	2
5	5	4	3
9	4	5	4
6	1	4	6
5	3	1	10
6	1	3	4
9	1	4	3
7	2	3	3
6	2	6	5
3	5	4	5
7	4	4	6
7	5	3	3
9	2	4	4
7	2	6	3
6	3	5	6
8	1	6	4
6	2	2	6
7	2	6	7
6	4	4	6
6	1	5	5
7	2	3	10
5	3	4	5
7	3	4	4
4	4	11	3
6	5	3	7
3	3	11	7
5	3	3	4
6	5	5	4
7	4	6	6
6	2	5	4
7	3	3	6
8	3	2	4
7	2	2	3
5	6	4	4
4	1	3	7
5	3	2	3
7	3	3	5
6	3	3	2
8	1	3	2
6	2	3	5
4	2	3	5
5	5	3	2
6	1	7	3
5	4	2	3
4	1	4	0
6	2	3	4
7	3	1	4
7	6	2	2
5	6	1	1
9	3	4	2
6	1	4	1
6	0	4	2
6	2	4	3
5	3	4	3
4	1	4	5
9	5	4	4
8	4	5	1
7	4	2	6
9	3	5	2
6	4	2	2
7	1	3	3
4	5	4	3
9	3	8	2
4	5	6	3
4	5	3	4
7	1	3	2
6	6	1	4
5	2	4	3
6	1	3	3
7	2	2	3
5	3	1	2
10	2	2	7
6	2	6	3
5	4	4	1
7	2	6	3
6	3	9	4
6	2	3	3
5	2	2	10
5	3	4	2
7	2	2	5
7	3	4	5
5	3	4	2
5	2	11	2
7	2	3	1
3	3	4	4
7	3	5	1
8	3	2	2
7	3	2	6
5	3	5	2
10	1	3	2
8	3	3	3
6	2	4	3
2	2	5	4
9	2	3	5
3	4	2	3
6	3	2	2
5	6	4	4
6	2	7	5
8	4	5	4
5	3	4	2
7	3	5	6
10	2	6	3
7	1	4	3
5	3	2	2
4	3	2	2
8	3	6	4
10	2	5	4
5	3	4	3
7	2	5	4
4	1	3	5
8	2	3	2
5	2	3	3
8	3	7	4
7	3	8	7
3	2	7	6
6	3	4	7
6	2	2	3
9	2	2	4
7	1	3	2
6	2	5	3
8	2	5	0
7	2	2	7
5	3	4	3
9	3	2	4
5	2	9	4
6	2	3	3
7	3	2	5
6	3	2	2
6	4	4	4
3	5	5	5
9	1	2	2
6	2	3	4
7	3	5	2
6	2	4	2
5	3	2	4
7	2	5	3
5	4	4	5
4	2	2	1
8	4	3	3
6	4	6	1
7	2	4	3
4	2	10	2
4	1	7	5
5	5	2	5
5	2	3	3
5	3	8	3
5	3	3	4
2	1	5	5
2	2	3	4
5	4	4	2
4	2	3	2
6	1	3	3
4	1	3	4
2	3	2	2
7	2	4	2
4	2	3	2
3	2	4	3
5	1	2	3
2	3	3	1
7	2	4	2
5	1	2	5
8	1	6	4
12	1	2	3
5	2	4	4
9	4	3	3
7	1	3	3
4	1	5	3
4	7	5	8
6	6	2	2
7	2	8	3
5	2	3	4
6	3	2	5
7	2	3	8
8	4	7	6
3	2	6	3
4	1	2	3
7	1	2	7
6	1	2	5
8	2	1	4
4	3	3	3
7	3	3	1
8	1	6	3
3	2	6	3
5	1	6	4
7	1	3	8
7	3	6	3
7	2	4	4
7	3	4	3
8	2	2	4
5	2	3	3
8	4	2	4
5	4	5	3
9	2	3	3
4	3	3	6
6	3	3	3
9	4	8	2
6	2	4	5
8	4	7	5
6	2	4	4
7	1	6	6
4	2	2	2
5	5	3	4
4	2	5	3
8	2	2	4
7	6	2	2
5	1	5	5
6	3	4	5
6	1	2	4
7	5	4	5
4	2	3	4
4	4	3	1
7	2	2	3
4	5	3	6
6	2	4	5
8	2	5	3
7	1	4	1
8	3	2	5
8	4	5	3
6	3	3	4
10	4	2	6
6	6	7	4
5	4	4	3
5	2	5	2
7	3	4	5
5	4	3	4
7	5	1	3
4	4	2	5
3	4	3	4
8	4	5	2
4	3	4	3
6	1	6	3
6	2	8	8
8	2	6	3
8	4	5	4
8	3	3	7
8	7	4	3
4	2	4	2
4	2	5	4
6	9	8	5
5	4	7	4
6	1	7	5
5	5	4	3
6	2	4	6
6	4	6	2
5	3	3	3
5	4	4	6
5	6	3	5
5	2	4	5
6	2	5	7
7	1	7	6
9	3	4	3
7	3	3	6
3	6	3	4
5	2	1	4
6	3	4	2
5	2	2	5
5	3	4	4
6	2	3	4
7	2	6	7
6	3	4	5
10	2	6	5
6	2	2	5
4	3	2	3
5	5	3	4
6	2	6	3
3	5	4	4
4	5	3	2
5	3	4	4
7	3	4	3
9	4	4	6
6	4	5	5
4	1	6	4
12	3	3	2
9	2	6	3
3	2	7	4
7	1	8	4
7	2	2	5
7	3	2	3
9	3	5	3
9	3	3	5
6	3	3	5
5	1	5	5
6	2	4	1
7	5	4	4
4	2	3	2
8	3	2	4
9	2	5	4
5	3	4	3
8	5	4	3
9	2	5	4
5	3	1	2
7	2	2	3
8	3		2
5	2		2
6	2		4
8	3		3
5	5		4
7	2		3
7	1		3
4	1		4
8	4		4
8	3		4
5	3		4
6	4		7
6	3		4
5	2		4
6	2		3
7	3		4
6	4		5
6	3		4
8	5		5
5	9		3
7	4		3
8	2		6
9	3		4
6	2		7
7	3		2
3	4		6
4	3		4
4	3		4
5	3		3
6	1		6
6	2		5
8	2		5
5	1		4
9	5		6
4	3		4
4	4		5
3	4		7
4	3		4
8	4		5
4	3		4
6	2		8
4	1		7
8	7		6
5	5		2
6	6		8
5	3		2
3	4		6
4	3		5
4	3		2
5	3		2
5	4		8
9	2		5
5	2		4
8	2		5
7	3		1
8	2		5
6	3		2
5	2		5
6	3		6
5	3		4
8	1		5
5	3		4
4	4
4	2
7	3
6	3
6	2
6	3
6	1
6	2
6	3
7	2
6	2
4	3
3	2
6	2
6	3
5	2
4	5
7	9
7	2
4	2
5	4
5	1
5	2
5	2
7	2
6	3
6	6
7	1
6	4
6	4
8	3
5	6
3	1
3	1
3	2
7	3
6	2
7	3
8	2
11	3
3	2
4	1
7	1
9	1
	3
	3
	5
	2
	1
	3
	3
	4
	2
	5
	4
	3
	4
	1
	3
	1
	2
	3
	2
	0
	4
	5
	5
	4
	2
	1
	1
	4
	5
	3
	3
	2
	4
	5
	4
	4
	3
	2
	2
	1
	4
	2
	4
	2
	1
	5
	3
	7
	4
	5
	2
	3
	3
	4
	4
	5
	3
	3
	3
	1
	2
	3
	2
	1
	3
	2
	2
	1
	2
	3
	4
	3
	3
	5
	5
	3
	1
	1
	1
	1
	6
	5
	3
	5
	2
	2
	2
	6
	2
	2
	3
	1
	1
	1
	3
	3
	3
	1
	3
	2
	2
	7
	2
	1
	6
	4
	3
	5
	6
	1
	1
	1
	2
	3
	0
	4
	2
	3
	4
	3
	3
	4
	3
	2
	4
	2
	3
	4
	3
	4
	1
	2
	1
	3
	5
	1
	2
	4
	1
	3
	3
	1
	2
	4
	3
	3
	5
	8
	3
	2
	1
	1
	4
	2
	1
	2
	2
	5
	4
	2
	4
	2
	2
	3
	2
	2
	0
	4
	1
	3
	3
	1
	2
	3
	3
	3
	5
	4
	6
	3
	3
	4
	4
	4
	3
	5
	2
	2
	4
	3
	2
	4
	3
	2
	1
	3
	4
	2
	3
	2
	1
	3
	3
	3
	4
	2
	2
	2
	3
	1
	4
	3
	2
	1
	1
	4
	1
	4
	3
	3
	4
	1
	3
	2
	3
	4
	2
	3
	3
	4
	1
	3
	5
	4
	1
	3
	1
	2
	1
	1
	2
	2
	3
	4
	2
	3
	3
	8
	3
	3
	3
	3
	3
	5
	2
	1
	2
	2
	4
	3
	5
	3
	3
	3
	2
	3
	4
	1
	4
	2
	2
	3
	0
	2
	2
	1
	2
	3
	1
	2
	3
	3
	3
	4
	1
	2
	1
	4
	2
	3
	2
	3
	1
	1
	5
	2
	3
	3
	2
	3
	2
	1
	2
	3
	4
	3
	1
	2
	1
	1
	6
	1
	1
	2
	2
	3
	3
	3
	4
	4
	2
	2
	3
	4
	3
	1
	3
	1
	1
	1
	1
	2
	2
	3
	2
	1
	2
	1
	1
	3
	2
	2
	1
	2
	3
