# Supplementary material for: Dissecting the phase separation and oligomerization activities of the carboxysome positioning protein McdB
Source: eLife journal article supplement (doi:10.7554/elife.81362), 2023-09-05
Supplement: supp [file Figure 8-source data 1.xlsx]

## Sheet: mean foci over mean cell inten
WT	McdB[-3]	∆McdA	∆McdA + McdB[-3]
3.08996	6.04152	1.14891	5.36013
2.6919	6.01463	1.26455	5.09585
2.67275	5.96583	1.28736	4.60539
2.61576	5.80638	1.29132	4.5603
2.59794	5.54934	1.29263	4.53232
2.59227	5.53775	1.32639	4.26129
2.56791	5.46276	1.34396	4.16399
2.56647	5.4355	1.35254	4.15052
2.54471	5.27694	1.37903	4.11994
2.54072	5.26572	1.38506	4.11321
2.53891	5.16824	1.40258	4.09289
2.48725	5.14671	1.41532	4.0594
2.4668	5.13105	1.41626	4.0298
2.4611	5.12637	1.41813	4.00863
2.4446	5.12281	1.41839	3.98022
2.43809	5.10917	1.41915	3.96183
2.43561	5.08134	1.42848	3.92573
2.42282	5.07759	1.42972	3.89647
2.41135	5.06674	1.44599	3.89369
2.40957	5.06278	1.44602	3.89146
2.40025	5.02967	1.45206	3.86721
2.39721	5.01444	1.45289	3.85927
2.39636	5.00993	1.45376	3.84959
2.39343	4.99775	1.45762	3.84486
2.38888	4.97081	1.45798	3.82175
2.38572	4.90014	1.45859	3.81769
2.38355	4.85198	1.46006	3.79304
2.38312	4.84332	1.46098	3.78066
2.37358	4.84235	1.46133	3.7797
2.37258	4.82143	1.46445	3.7794
2.37115	4.78967	1.46548	3.74745
2.36963	4.78437	1.47376	3.73758
2.36645	4.77806	1.47415	3.73143
2.36558	4.77702	1.48023	3.73015
2.36297	4.74836	1.48115	3.72483
2.35991	4.74729	1.48349	3.70705
2.35936	4.72277	1.48503	3.70294
2.35587	4.71003	1.48925	3.69587
2.35445	4.66939	1.49037	3.68167
2.35431	4.6665	1.49057	3.67345
2.34932	4.62716	1.4994	3.6635
2.34813	4.62671	1.5024	3.66316
2.34273	4.62657	1.50266	3.66181
2.33368	4.60929	1.50278	3.65857
2.32868	4.60663	1.50404	3.6584
2.32343	4.6043	1.5044	3.65693
2.32106	4.59391	1.51156	3.64805
2.31878	4.58712	1.51303	3.64535
2.31343	4.58131	1.51795	3.63559
2.31248	4.5718	1.51922	3.61801
2.30991	4.55646	1.51932	3.61377
2.30322	4.54907	1.51988	3.59112
2.30294	4.54185	1.52126	3.58689
2.30273	4.53289	1.52221	3.57287
2.30259	4.52558	1.5225	3.57156
2.30109	4.52167	1.52469	3.56464
2.29359	4.51036	1.52716	3.56396
2.29263	4.49462	1.53552	3.56309
2.29063	4.47365	1.53583	3.54601
2.28406	4.47178	1.53684	3.54474
2.27803	4.46712	1.54354	3.53629
2.27491	4.4527	1.54481	3.53415
2.27437	4.45097	1.54777	3.51657
2.2735	4.43701	1.54799	3.50773
2.2733	4.42681	1.54821	3.50484
2.27125	4.40664	1.5551	3.50463
2.27017	4.4007	1.55731	3.50454
2.26734	4.39127	1.55917	3.49568
2.26715	4.38888	1.56031	3.49149
2.26705	4.3877	1.56076	3.48598
2.26616	4.37647	1.56159	3.46905
2.26306	4.3708	1.56351	3.46747
2.2621	4.36882	1.56377	3.46378
2.26195	4.35768	1.56476	3.45716
2.26182	4.35431	1.56744	3.44401
2.2585	4.34675	1.56924	3.44381
2.25573	4.33644	1.57107	3.43365
2.25552	4.32815	1.57151	3.43223
2.25481	4.31676	1.57338	3.42925
2.25423	4.3111	1.57586	3.41937
2.2516	4.30653	1.57595	3.41913
2.2495	4.29008	1.57608	3.41717
2.24639	4.2875	1.57992	3.41602
2.24566	4.28177	1.58031	3.41509
2.24519	4.27437	1.58318	3.41198
2.24385	4.27008	1.58489	3.41033
2.24312	4.26645	1.5889	3.41015
2.24275	4.26349	1.58971	3.40984
2.24182	4.23558	1.58983	3.40768
2.24111	4.23408	1.59016	3.4003
2.24053	4.22057	1.59044	3.3978
2.23773	4.21509	1.59092	3.39375
2.23764	4.20716	1.59176	3.39247
2.23629	4.20134	1.5926	3.39123
2.23244	4.19628	1.59523	3.38999
2.22702	4.18995	1.59819	3.38932
2.22622	4.18446	1.59959	3.37843
2.22386	4.17728	1.60342	3.37689
2.22367	4.17576	1.60398	3.37467
2.22307	4.17572	1.60471	3.37222
2.21989	4.17296	1.60795	3.37078
2.21985	4.15936	1.6091	3.37028
2.21868	4.14909	1.60932	3.34885
2.21777	4.14202	1.61017	3.34706
2.21386	4.12915	1.61018	3.34394
2.2116	4.12904	1.6104	3.34092
2.21071	4.12176	1.61113	3.33906
2.21003	4.12041	1.61175	3.33499
2.20861	4.11323	1.61217	3.33453
2.20857	4.1073	1.61461	3.32404
2.20821	4.09805	1.61651	3.31584
2.20786	4.08865	1.61822	3.31525
2.20669	4.08771	1.62105	3.31419
2.20602	4.08758	1.62191	3.31128
2.20599	4.08519	1.6231	3.31008
2.20525	4.08157	1.62434	3.3065
2.20426	4.07444	1.6275	3.30384
2.2037	4.06974	1.62765	3.29943
2.20321	4.05966	1.63074	3.29262
2.20311	4.04935	1.63281	3.29181
2.202	4.04467	1.63412	3.28949
2.20032	4.03507	1.63821	3.28917
2.19857	4.03073	1.63892	3.28481
2.19715	4.02963	1.63922	3.28478
2.19624	4.02564	1.63929	3.28089
2.19369	4.01314	1.63961	3.27294
2.19355	4.00842	1.64006	3.27168
2.19307	4.00521	1.64251	3.27127
2.19165	3.99912	1.64261	3.26922
2.18825	3.99554	1.6429	3.26457
2.18809	3.98733	1.64316	3.25567
2.18734	3.98548	1.64381	3.25461
2.18601	3.98258	1.64432	3.25348
2.18585	3.97248	1.64477	3.25339
2.18335	3.97231	1.64488	3.24581
2.18262	3.96651	1.64532	3.24468
2.18254	3.96305	1.64607	3.24185
2.17849	3.95181	1.64629	3.23853
2.17835	3.95022	1.64641	3.23281
2.17647	3.94763	1.6484	3.22738
2.17386	3.94473	1.64947	3.22668
2.17299	3.94299	1.65352	3.22599
2.17195	3.93767	1.65416	3.22414
2.17133	3.92976	1.65821	3.22352
2.17117	3.92896	1.65987	3.22295
2.16909	3.92087	1.66014	3.22252
2.16897	3.91951	1.66046	3.22003
2.16541	3.91312	1.66183	3.21278
2.16442	3.91047	1.66187	3.20911
2.16441	3.91007	1.6627	3.20736
2.16394	3.90405	1.66359	3.20284
2.16379	3.89689	1.66414	3.20077
2.16327	3.88788	1.66587	3.19409
2.16296	3.88605	1.6673	3.1901
2.1629	3.88298	1.67139	3.18785
2.16284	3.87722	1.67159	3.18696
2.16275	3.87657	1.67167	3.18643
2.16218	3.86945	1.67175	3.18497
2.16144	3.85812	1.67189	3.17968
2.16089	3.85723	1.67227	3.17829
2.16049	3.853	1.67277	3.17029
2.16048	3.85243	1.67396	3.16462
2.1601	3.85058	1.67405	3.16364
2.16007	3.84493	1.67421	3.16128
2.15881	3.84117	1.67788	3.15447
2.15807	3.84014	1.6786	3.153
2.15785	3.83155	1.67871	3.15182
2.15785	3.82721	1.67918	3.14907
2.15737	3.82551	1.67969	3.14834
2.15733	3.82539	1.68109	3.1438
2.15647	3.82453	1.6825	3.1429
2.15608	3.82245	1.68286	3.1406
2.15593	3.81822	1.68376	3.13877
2.15541	3.81546	1.68538	3.13782
2.15499	3.81475	1.68626	3.13373
2.15427	3.81434	1.68647	3.12767
2.15252	3.814	1.68774	3.12721
2.15249	3.81387	1.68799	3.12662
2.15094	3.80888	1.68813	3.12605
2.1506	3.80843	1.68818	3.12312
2.15021	3.80293	1.68901	3.12171
2.14935	3.80112	1.68906	3.12163
2.14893	3.79862	1.68952	3.12012
2.14829	3.786	1.68954	3.10855
2.14658	3.78338	1.68979	3.10382
2.14613	3.78053	1.69041	3.10203
2.146	3.77918	1.69221	3.0943
2.14559	3.77256	1.69247	3.0928
2.14439	3.77199	1.69251	3.09183
2.14354	3.76984	1.6926	3.08706
2.1435	3.76966	1.69268	3.08084
2.14256	3.7691	1.69315	3.08071
2.1425	3.74549	1.69551	3.08053
2.14231	3.73835	1.69675	3.07763
2.14229	3.7331	1.69678	3.07451
2.14116	3.73308	1.69757	3.07378
2.14046	3.72542	1.69802	3.06969
2.14032	3.72508	1.69834	3.0693
2.13959	3.7118	1.699	3.06683
2.13807	3.70892	1.6991	3.06543
2.13795	3.70708	1.70024	3.06288
2.13775	3.70062	1.70047	3.06115
2.13614	3.69986	1.70349	3.0585
2.13577	3.69722	1.70399	3.05646
2.13256	3.69365	1.7053	3.05527
2.13196	3.69251	1.70882	3.05404
2.13042	3.69129	1.70906	3.05172
2.13015	3.69117	1.7102	3.05073
2.12837	3.69022	1.71295	3.04948
2.12644	3.68245	1.71336	3.04852
2.12543	3.6816	1.7162	3.04352
2.12421	3.67345	1.71706	3.03989
2.12329	3.66373	1.71748	3.03925
2.12321	3.66172	1.71942	3.03839
2.1228	3.66081	1.72021	3.03745
2.12266	3.65572	1.72258	3.03548
2.12115	3.6511	1.72297	3.02971
2.12085	3.65096	1.72326	3.02892
2.12051	3.64888	1.72354	3.02536
2.1204	3.64702	1.72381	3.0244
2.12018	3.64626	1.72444	3.02421
2.11875	3.64243	1.72613	3.021
2.11835	3.63987	1.72672	3.02086
2.11751	3.63908	1.72726	3.02073
2.11661	3.63474	1.72759	3.01955
2.11474	3.6346	1.7281	3.01788
2.11377	3.63399	1.72929	3.01719
2.11336	3.62869	1.72959	3.01459
2.11251	3.61517	1.72966	3.01265
2.11193	3.61414	1.73005	3.01107
2.11093	3.61289	1.73032	3.00529
2.11012	3.60686	1.73121	3.00209
2.10931	3.59497	1.73157	3.00106
2.10928	3.59114	1.73356	2.99946
2.10858	3.58338	1.73447	2.99561
2.10822	3.5833	1.73506	2.99531
2.10782	3.58061	1.7353	2.99424
2.10621	3.57699	1.73671	2.99347
2.1057	3.57389	1.73913	2.99215
2.10552	3.57274	1.73937	2.98795
2.10543	3.56852	1.74113	2.98776
2.10444	3.5682	1.74232	2.98729
2.10442	3.56743	1.74348	2.98595
2.10429	3.56161	1.74485	2.98595
2.10315	3.55884	1.75039	2.9859
2.10314	3.55642	1.75111	2.98504
2.10162	3.55614	1.75301	2.98465
2.10139	3.55101	1.75376	2.98416
2.10069	3.54595	1.75385	2.98095
2.10067	3.54369	1.75559	2.98063
2.1	3.54324	1.75561	2.97542
2.09932	3.53574	1.75575	2.97452
2.09782	3.53418	1.75737	2.97394
2.09735	3.5305	1.75789	2.97393
2.0966	3.52647	1.75844	2.97114
2.09636	3.52489	1.75995	2.96895
2.09549	3.51738	1.7601	2.96881
2.09416	3.51708	1.76165	2.96639
2.09381	3.51686	1.76296	2.9645
2.09359	3.51665	1.76347	2.96293
2.09313	3.51427	1.76609	2.9612
2.09271	3.51296	1.76614	2.95965
2.09245	3.51206	1.76842	2.95956
2.09208	3.51153	1.76924	2.95881
2.09202	3.51065	1.7696	2.95723
2.09173	3.50324	1.76962	2.95551
2.09147	3.49724	1.7697	2.95541
2.09137	3.4967	1.77158	2.95504
2.09123	3.49429	1.77255	2.95471
2.09074	3.49207	1.77316	2.951
2.09071	3.48999	1.77494	2.95091
2.08995	3.48987	1.77565	2.95064
2.08821	3.48767	1.77622	2.9503
2.08801	3.48697	1.77908	2.94884
2.08584	3.48473	1.7813	2.94809
2.08583	3.48124	1.7822	2.94592
2.08583	3.47598	1.78545	2.93998
2.08575	3.47297	1.78572	2.93785
2.08429	3.4699	1.78658	2.9359
2.08418	3.46764	1.78871	2.93429
2.08379	3.46641	1.78915	2.93375
2.08305	3.465	1.78995	2.93327
2.08287	3.46177	1.79141	2.92995
2.08229	3.46161	1.79214	2.92889
2.08207	3.45826	1.79305	2.92799
2.08047	3.45825	1.7953	2.92649
2.08022	3.45683	1.79669	2.92292
2.08013	3.45568	1.79933	2.92144
2.07843	3.4515	1.80013	2.91917
2.07816	3.44826	1.80361	2.91855
2.07728	3.44806	1.80498	2.91481
2.07622	3.44612	1.80531	2.91421
2.07602	3.44536	1.80541	2.91284
2.0755	3.4453	1.80612	2.91065
2.07543	3.44083	1.80637	2.91065
2.0754	3.44029	1.81	2.9079
2.07537	3.43643	1.81079	2.9077
2.07333	3.43383	1.81552	2.90586
2.07285	3.43354	1.81608	2.90462
2.07204	3.43238	1.81695	2.90341
2.07148	3.42882	1.81698	2.90193
2.06996	3.42518	1.8178	2.89977
2.06916	3.42463	1.81915	2.89701
2.06802	3.41689	1.82035	2.89513
2.06676	3.41419	1.82037	2.8928
2.06636	3.41266	1.8206	2.88947
2.06577	3.41082	1.82067	2.88737
2.06576	3.40203	1.82086	2.88705
2.06567	3.39475	1.82152	2.88422
2.06459	3.39353	1.82248	2.8822
2.06408	3.39118	1.82306	2.87563
2.06402	3.37238	1.82559	2.87468
2.06206	3.37097	1.82619	2.87448
2.06201	3.36053	1.82633	2.87306
2.06154	3.34997	1.82643	2.87136
2.06055	3.34852	1.82655	2.86966
2.05984	3.34189	1.82767	2.8661
2.05973	3.34074	1.82775	2.86587
2.05875	3.33909	1.82776	2.86575
2.05851	3.33766	1.82993	2.86497
2.05836	3.33269	1.83008	2.86453
2.05811	3.32675	1.83015	2.8622
2.05772	3.32655	1.83064	2.86218
2.05759	3.32568	1.83218	2.86125
2.05725	3.31585	1.83407	2.8585
2.05714	3.30535	1.83407	2.85781
2.05669	3.30195	1.83637	2.85458
2.05637	3.29298	1.83654	2.85266
2.056	3.29244	1.83854	2.84976
2.05542	3.28985	1.84338	2.84884
2.05528	3.28912	1.84529	2.84861
2.05415	3.28598	1.84679	2.84709
2.05346	3.28503	1.84733	2.84676
2.05256	3.28396	1.84749	2.84604
2.05243	3.28296	1.84973	2.8445
2.05228	3.28092	1.84979	2.84381
2.0513	3.2805	1.85088	2.84373
2.04976	3.27543	1.85269	2.8423
2.04973	3.2739	1.85382	2.8392
2.04968	3.27296	1.85487	2.83919
2.04947	3.26734	1.8556	2.83661
2.04911	3.26483	1.85584	2.83561
2.04721	3.26308	1.85603	2.83541
2.04708	3.26179	1.85731	2.83333
2.04706	3.25666	1.85777	2.83314
2.04704	3.25446	1.85976	2.83139
2.04677	3.24936	1.86132	2.82756
2.0462	3.24923	1.8622	2.82679
2.0458	3.24786	1.86226	2.82597
2.04554	3.2438	1.86382	2.82382
2.04451	3.24335	1.86411	2.82304
2.04444	3.24177	1.86481	2.82058
2.04409	3.23802	1.86491	2.82018
2.04397	3.23801	1.86538	2.8194
2.0437	3.23504	1.86541	2.81828
2.04332	3.23351	1.86742	2.81755
2.0432	3.22813	1.86746	2.81428
2.04203	3.22576	1.86752	2.8122
2.04191	3.22183	1.87001	2.81042
2.04183	3.22146	1.8721	2.80888
2.0418	3.22004	1.87238	2.8071
2.03985	3.2161	1.87396	2.80601
2.03891	3.21601	1.87409	2.80548
2.03875	3.21314	1.8744	2.80517
2.03857	3.21268	1.87444	2.80188
2.03844	3.21127	1.87517	2.80138
2.03784	3.20995	1.8753	2.79777
2.03764	3.20869	1.87581	2.79648
2.03755	3.20853	1.87595	2.79483
2.03755	3.20835	1.87596	2.79481
2.03726	3.20735	1.87848	2.78963
2.03694	3.20504	1.87881	2.78642
2.03692	3.20226	1.87958	2.78584
2.03643	3.20135	1.87958	2.7852
2.03494	3.20068	1.87959	2.78068
2.03474	3.20063	1.87964	2.78035
2.03463	3.20054	1.88045	2.77755
2.0344	3.19725	1.88062	2.77739
2.03406	3.1969	1.88351	2.77374
2.03371	3.19604	1.8842	2.77133
2.03332	3.19549	1.88505	2.76764
2.03296	3.19421	1.88555	2.76748
2.03253	3.19419	1.88732	2.76667
2.03252	3.19402	1.88735	2.7642
2.03213	3.19152	1.88963	2.76346
2.03212	3.18869	1.89208	2.76187
2.03175	3.18161	1.89265	2.75654
2.03157	3.18092	1.89269	2.75569
2.03094	3.18067	1.89283	2.75306
2.03083	3.1789	1.89387	2.75172
2.0304	3.17803	1.89485	2.75158
2.02972	3.17768	1.89546	2.75044
2.02968	3.17757	1.89637	2.75025
2.02957	3.177	1.89731	2.75008
2.02946	3.17643	1.89812	2.74926
2.02934	3.1727	1.8993	2.74778
2.02884	3.17261	1.90008	2.74724
2.02841	3.17121	1.90022	2.74614
2.02762	3.16715	1.90062	2.74607
2.02735	3.1664	1.90154	2.74495
2.02593	3.16625	1.90179	2.74402
2.02548	3.16572	1.90535	2.74399
2.02523	3.1628	1.90541	2.74154
2.02495	3.16118	1.90594	2.74082
2.0246	3.15902	1.90613	2.7404
2.02457	3.15776	1.90676	2.73857
2.02419	3.1558	1.907	2.73827
2.02341	3.15535	1.91191	2.73708
2.02302	3.15331	1.9123	2.73684
2.02268	3.1524	1.91232	2.7353
2.02244	3.15206	1.91783	2.73428
2.02025	3.15196	1.92196	2.73147
2.01961	3.15127	1.92209	2.73033
2.01863	3.1501	1.9223	2.73031
2.01844	3.15009	1.92294	2.73026
2.01801	3.14695	1.923	2.72536
2.01787	3.14298	1.92323	2.7224
2.0178	3.14243	1.92434	2.72143
2.01661	3.14002	1.92465	2.72108
2.0162	3.13861	1.92653	2.71974
2.01619	3.1367	1.92876	2.71687
2.01616	3.13553	1.93065	2.71562
2.01577	3.13262	1.93077	2.71406
2.01496	3.13227	1.93117	2.70933
2.01467	3.12745	1.93134	2.70927
2.01434	3.1267	1.93248	2.70519
2.01415	3.12184	1.9329	2.70396
2.01397	3.12121	1.93355	2.70335
2.0137	3.11805	1.93428	2.70273
2.01348	3.1164	1.93502	2.69805
2.0132	3.11488	1.93533	2.69753
2.01295	3.11321	1.93584	2.69607
2.01289	3.11301	1.93695	2.69577
2.01275	3.10599	1.93759	2.69555
2.0126	3.10159	1.93857	2.69441
2.01149	3.10112	1.93878	2.69295
2.01098	3.1002	1.93878	2.69158
2.01043	3.1	1.9389	2.69148
2.01023	3.0984	1.93913	2.69095
2.00968	3.09625	1.94028	2.6907
2.00912	3.09542	1.94133	2.69034
2.00903	3.09223	1.94377	2.68891
2.00853	3.09091	1.94513	2.68872
2.00846	3.0896	1.94709	2.6881
2.0084	3.08956	1.95055	2.68679
2.00787	3.08877	1.95108	2.68646
2.00681	3.0868	1.95155	2.68416
2.00672	3.08371	1.95355	2.68335
2.00653	3.08253	1.9548	2.68302
2.00612	3.08234	1.95823	2.68294
2.00584	3.08221	1.95842	2.68125
2.00502	3.08079	1.95847	2.68085
2.005	3.08007	1.95863	2.6798
2.00464	3.07719	1.95917	2.67961
2.00463	3.07499	1.96069	2.6791
2.00419	3.07452	1.96155	2.67414
2.00415	3.07302	1.96357	2.67402
2.00325	3.07228	1.96702	2.67326
2.00322	3.0696	1.96705	2.6728
2.00238	3.06736	1.96899	2.6721
2.00203	3.06678	1.96986	2.67209
2.00152	3.0659	1.97016	2.66791
2.00033	3.06378	1.97272	2.66759
2.00029	3.06017	1.9743	2.66678
2.0002	3.06014	1.97435	2.66528
2.00007	3.05775	1.97562	2.66478
1.99963	3.05689	1.97916	2.66434
1.99934	3.05114	1.98267	2.6641
1.99738	3.05075	1.98396	2.66394
1.99731	3.04788	1.98466	2.66368
1.99707	3.04777	1.98766	2.65643
1.99618	3.04651	1.98871	2.65193
1.99586	3.04475	1.98903	2.6501
1.99567	3.04243	1.98977	2.64952
1.99532	3.0422	1.99137	2.64865
1.99515	3.04144	1.99141	2.64856
1.99511	3.04066	1.99197	2.64833
1.99502	3.04027	1.99253	2.64801
1.99364	3.03878	1.99373	2.64682
1.9924	3.03843	1.99441	2.64657
1.99175	3.03817	1.99504	2.64551
1.99111	3.03526	1.99638	2.64526
1.99079	3.02823	1.99665	2.64434
1.99039	3.0269	1.99777	2.64412
1.99008	3.02661	1.99987	2.64401
1.98957	3.02628	2.00006	2.643
1.98949	3.02616	2.00064	2.64018
1.98916	3.02522	2.0011	2.63991
1.98905	3.02184	2.00239	2.63989
1.98893	3.01623	2.00271	2.63935
1.98852	3.01603	2.00319	2.63858
1.98846	3.01441	2.00417	2.63829
1.98763	3.01085	2.00456	2.63813
1.98706	3.00981	2.00557	2.63622
1.98544	3.00354	2.00701	2.63568
1.98345	3.0023	2.00765	2.63519
1.98336	3.00165	2.00838	2.63414
1.98317	3.00029	2.00861	2.63237
1.98303	2.99971	2.00945	2.63128
1.98263	2.99759	2.01102	2.62764
1.98224	2.99376	2.01262	2.62687
1.98212	2.99308	2.01271	2.61895
1.98204	2.98753	2.01507	2.61809
1.98201	2.98511	2.0163	2.61707
1.98147	2.9835	2.01685	2.61465
1.9805	2.98266	2.01784	2.61424
1.98026	2.97934	2.01833	2.61202
1.98015	2.97627	2.01881	2.60893
1.97994	2.97514	2.02077	2.60789
1.97926	2.97253	2.02143	2.60766
1.97866	2.97249	2.02153	2.60585
1.97803	2.97134	2.02301	2.60529
1.9768	2.96969	2.02522	2.60318
1.97627	2.96939	2.02656	2.60281
1.97562	2.96825	2.02946	2.60255
1.97523	2.96718	2.03046	2.60107
1.97459	2.96629	2.03054	2.59536
1.9741	2.96467	2.03143	2.59487
1.97394	2.9641	2.03148	2.59469
1.97374	2.96078	2.03191	2.59395
1.9731	2.95918	2.0321	2.59305
1.97261	2.95824	2.03238	2.59174
1.97234	2.95815	2.03338	2.5906
1.9721	2.95764	2.03398	2.58959
1.97183	2.95619	2.03774	2.58904
1.97123	2.95564	2.04101	2.58885
1.97094	2.95344	2.04304	2.5833
1.97092	2.95297	2.04356	2.58301
1.97058	2.94802	2.04472	2.58194
1.97003	2.94316	2.04474	2.58192
1.9696	2.94075	2.04644	2.58126
1.96863	2.93649	2.04849	2.58005
1.96854	2.93602	2.05037	2.5798
1.96848	2.93526	2.05082	2.57872
1.96708	2.93179	2.05229	2.57858
1.96626	2.92661	2.05291	2.57786
1.96503	2.92629	2.0565	2.5771
1.96494	2.92579	2.0571	2.57383
1.96453	2.92435	2.05897	2.57311
1.96435	2.92326	2.05914	2.57144
1.96423	2.92304	2.06193	2.57055
1.96221	2.92181	2.06321	2.56956
1.96208	2.91666	2.0637	2.5681
1.96191	2.91548	2.06696	2.56404
1.96185	2.91402	2.0702	2.56254
1.96155	2.91323	2.07135	2.5615
1.9613	2.90998	2.07166	2.56114
1.96125	2.90926	2.07285	2.56022
1.96119	2.9091	2.07477	2.55691
1.96114	2.90523	2.07523	2.55392
1.96113	2.90479	2.076	2.55182
1.96107	2.903	2.07664	2.5488
1.96102	2.89829	2.07698	2.54796
1.95946	2.89456	2.08177	2.54751
1.95933	2.89427	2.08207	2.54719
1.95917	2.89267	2.08242	2.54655
1.95845	2.89126	2.08742	2.54493
1.95804	2.89035	2.08934	2.54409
1.95778	2.8895	2.09167	2.54351
1.95762	2.88936	2.09258	2.54139
1.95759	2.88931	2.09475	2.53992
1.95738	2.88393	2.09695	2.53865
1.95716	2.8821	2.09757	2.53784
1.9552	2.88013	2.10114	2.5352
1.95514	2.87145	2.10223	2.53474
1.95479	2.87104	2.10229	2.53355
1.95425	2.87017	2.10367	2.53152
1.9539	2.86812	2.10672	2.53051
1.95385	2.86647	2.10682	2.5283
1.95291	2.86268	2.10917	2.52594
1.95233	2.85736	2.10921	2.52584
1.95227	2.85369	2.11436	2.52189
1.95173	2.85267	2.1155	2.51985
1.95172	2.85145	2.11614	2.51937
1.9512	2.85083	2.11628	2.51831
1.95096	2.84688	2.12143	2.51824
1.95092	2.84642	2.12376	2.51817
1.95092	2.83792	2.12525	2.51504
1.94872	2.83573	2.12579	2.51469
1.94769	2.83092	2.12754	2.51012
1.94764	2.8258	2.12786	2.50878
1.94753	2.82477	2.12806	2.50874
1.94647	2.8223	2.12846	2.50667
1.94607	2.8204	2.12993	2.50407
1.94494	2.81855	2.13087	2.50041
1.9447	2.81581	2.13095	2.5003
1.94326	2.81541	2.13274	2.4994
1.94295	2.81456	2.13277	2.49578
1.94278	2.8135	2.13444	2.49476
1.94211	2.81226	2.13592	2.49347
1.9416	2.81167	2.1361	2.49302
1.94149	2.80721	2.13689	2.49097
1.94038	2.80526	2.14317	2.48948
1.93883	2.79954	2.14324	2.48454
1.93764	2.79951	2.14989	2.48432
1.93747	2.79912	2.15258	2.48361
1.93648	2.79908	2.15471	2.48338
1.93604	2.79314	2.15616	2.48232
1.93585	2.79272	2.16029	2.4808
1.93466	2.7904	2.16128	2.48011
1.93466	2.79	2.16225	2.47971
1.9342	2.78369	2.16313	2.47844
1.9338	2.77511	2.16828	2.47489
1.93271	2.77408	2.16924	2.47181
1.93264	2.77254	2.16956	2.47146
1.93215	2.77107	2.17179	2.47039
1.93108	2.7703	2.17361	2.46946
1.93104	2.77001	2.17409	2.46627
1.93006	2.76936	2.17537	2.46531
1.93004	2.76549	2.17564	2.46425
1.92835	2.75894	2.17676	2.46184
1.92821	2.75582	2.18062	2.45998
1.92813	2.75575	2.18302	2.45909
1.92756	2.75551	2.18507	2.45825
1.92709	2.75216	2.18556	2.45716
1.9264	2.7475	2.18619	2.4558
1.92609	2.74685	2.19007	2.45508
1.92594	2.74511	2.19126	2.45362
1.92573	2.74454	2.19131	2.45237
1.92329	2.74135	2.19167	2.45091
1.92329	2.74043	2.19295	2.45088
1.92288	2.73566	2.19316	2.44984
1.92205	2.73266	2.19321	2.4451
1.9219	2.73035	2.19426	2.43776
1.92172	2.72806	2.19538	2.43703
1.92168	2.72551	2.2061	2.43638
1.92111	2.72442	2.21184	2.43312
1.92095	2.72012	2.21202	2.42698
1.92065	2.71847	2.21373	2.42681
1.91534	2.71595	2.22349	2.42656
1.91475	2.71499	2.22717	2.42536
1.91474	2.71274	2.2282	2.42313
1.91262	2.70763	2.23188	2.42122
1.9126	2.70255	2.23799	2.42026
1.91197	2.69859	2.24506	2.41997
1.91191	2.69853	2.25031	2.41989
1.9116	2.69776	2.25107	2.41976
1.91081	2.69518	2.25325	2.41499
1.91012	2.69406	2.25408	2.41395
1.90932	2.69302	2.25437	2.41207
1.90734	2.69299	2.25502	2.40684
1.90714	2.69248	2.25713	2.4011
1.90671	2.69138	2.25741	2.40017
1.90642	2.6908	2.25768	2.39905
1.90584	2.68884	2.25797	2.3981
1.90535	2.68875	2.25825	2.39004
1.90534	2.68695	2.25943	2.38869
1.90408	2.68584	2.2637	2.38463
1.90296	2.68314	2.26874	2.38241
1.90186	2.68123	2.26898	2.38035
1.90137	2.68037	2.27068	2.37685
1.90098	2.67771	2.27121	2.37501
1.90038	2.67692	2.2761	2.37218
1.9003	2.67502	2.29115	2.37164
1.89903	2.67354	2.29179	2.36783
1.89889	2.67239	2.29954	2.36753
1.89832	2.67223	2.30565	2.36743
1.89807	2.67124	2.31599	2.36673
1.89676	2.66842	2.31735	2.36326
1.89604	2.66733	2.31789	2.36322
1.89603	2.66529	2.31918	2.36293
1.89595	2.66394	2.32073	2.36081
1.8953	2.65975	2.32349	2.36076
1.8946	2.659	2.33859	2.35937
1.89453	2.65873	2.34238	2.35876
1.89451	2.65843	2.35014	2.35849
1.89237	2.65773	2.35266	2.35718
1.8919	2.6555	2.35751	2.3534
1.89071	2.6547	2.3638	2.35304
1.8889	2.65141	2.36437	2.35302
1.88868	2.65079	2.36562	2.35059
1.88815	2.64979	2.37382	2.34768
1.8879	2.64792	2.39188	2.3419
1.88766	2.64752	2.42274	2.34135
1.88696	2.64695	2.4352	2.34118
1.88576	2.6454	2.43741	2.34116
1.88564	2.64475	2.45285	2.33723
1.88519	2.64363	2.47249	2.33496
1.88381	2.6407	2.48234	2.33451
1.88349	2.63938	2.48413	2.33362
1.88343	2.63836	2.53013	2.32845
1.88222	2.63833	2.54593	2.32702
1.88204	2.63781	2.54871	2.32668
1.88065	2.63754	2.5515	2.31985
1.87916	2.63606	2.5709	2.31596
1.87815	2.63342	2.58705	2.31216
1.87779	2.63281	2.60513	2.31155
1.87617	2.63149	2.64447	2.31124
1.87466	2.62749	2.65822	2.30745
1.87402	2.62689	2.71178	2.30643
1.87373	2.62211	2.79989	2.30436
1.87181	2.62186	2.86254	2.30377
1.87172	2.62012	2.91602	2.30332
1.87119	2.61977	2.9264	2.30225
1.8693	2.61876	2.96966	2.29666
1.86779	2.61863	2.99202	2.29539
1.86748	2.6162	2.999	2.29436
1.86726	2.61272		2.29151
1.86697	2.6097		2.2871
1.8668	2.60836		2.28419
1.86628	2.60794		2.27765
1.86373	2.60721		2.27556
1.86294	2.60543		2.26883
1.86053	2.60515		2.26573
1.86038	2.60431		2.26462
1.85874	2.60267		2.26349
1.85862	2.60113		2.25533
1.85611	2.59943		2.25451
1.85481	2.59904		2.2543
1.85449	2.59615		2.25359
1.8533	2.5961		2.25146
1.85158	2.59512		2.25121
1.85123	2.58853		2.24726
1.85114	2.58717		2.24651
1.85105	2.58711		2.24153
1.85102	2.58618		2.23759
1.84997	2.58066		2.23444
1.84613	2.57949		2.23176
1.84564	2.57782		2.22609
1.84533	2.57663		2.21875
1.84491	2.57639		2.21492
1.84398	2.57547		2.2146
1.84181	2.57461		2.21366
1.84181	2.57033		2.20378
1.84123	2.5701		2.20143
1.84066	2.5663		2.19735
1.84036	2.56562		2.19375
1.8403	2.56559		2.1918
1.83968	2.56435		2.18785
1.8391	2.56397		2.18684
1.8389	2.56196		2.17343
1.83858	2.56073		2.17274
1.83838	2.56039		2.16808
1.83804	2.56022		2.16689
1.83722	2.55967		2.16613
1.83492	2.55916		2.16197
1.83457	2.55585		2.15174
1.83425	2.55563		2.14871
1.83345	2.55156		2.14635
1.83071	2.54652		2.14618
1.83054	2.54533		2.13033
1.82991	2.54106		2.12687
1.82772	2.54083		2.1257
1.82679	2.53917		2.12422
1.82619	2.53692		2.12401
1.82591	2.53661		2.12373
1.82431	2.53652		2.12049
1.8239	2.53261		2.11403
1.82388	2.52897		2.1091
1.81964	2.52757		2.09965
1.8191	2.5242		2.09733
1.81773	2.52268		2.09195
1.81718	2.52182		2.09177
1.81681	2.52112		2.09113
1.81606	2.51894		2.07715
1.81561	2.51787		2.07622
1.81447	2.51516		2.07336
1.81441	2.51449		2.06732
1.81241	2.5142		2.06316
1.81031	2.51342		2.04878
1.80992	2.51088		2.04805
1.80914	2.50995		2.04747
1.80654	2.50936		2.04708
1.80618	2.50849		2.04673
1.80569	2.50823		2.04371
1.80467	2.5071		2.04206
1.80448	2.50686		2.03454
1.8037	2.50639		2.03124
1.80235	2.50568		2.029
1.80216	2.50473		2.02162
1.80213	2.50112		2.02046
1.80062	2.49951		2.01666
1.80009	2.49795		2.01549
1.79778	2.49753		1.98417
1.7976	2.49732		1.97331
1.79637	2.49696		1.97182
1.79604	2.49647		1.94438
1.79421	2.49467		1.93639
1.79412	2.49444		1.91471
1.79408	2.49005		1.90075
1.79291	2.48895		1.86252
1.79194	2.48851		1.81885
1.79172	2.48848		1.81467
1.78914	2.48592		1.79943
1.78847	2.48571		1.68706
1.7876	2.48347
1.78633	2.48244
1.78584	2.48174
1.78318	2.47789
1.78197	2.4746
1.7786	2.47421
1.77824	2.47388
1.77347	2.46848
1.77325	2.46837
1.76984	2.46501
1.7672	2.46421
1.76705	2.45934
1.76683	2.45716
1.76403	2.44506
1.76203	2.44468
1.76123	2.44406
1.75995	2.444
1.74937	2.44281
1.7487	2.43812
1.74754	2.4379
1.74752	2.43713
1.74681	2.43414
1.74622	2.43339
1.74586	2.4303
1.74523	2.42824
1.73543	2.42809
1.73511	2.42437
1.73259	2.42291
1.73257	2.42159
1.72775	2.41708
1.71399	2.41366
1.71172	2.41309
1.70311	2.41157
1.70311	2.40817
1.7015	2.40339
1.70125	2.40087
1.69943	2.39962
1.6987	2.39909
1.69869	2.39727
1.69748	2.39681
1.69694	2.39611
1.69031	2.39522
1.68892	2.39456
1.68887	2.39386
1.68512	2.39114
1.68454	2.38876
1.68385	2.38818
1.68252	2.388
1.67914	2.38761
1.6602	2.38729
1.65264	2.38219
1.64905	2.38093
1.6479	2.38086
1.60575	2.38079
1.60245	2.37692
1.59945	2.37612
1.53748	2.37328
1.34607	2.37254
	2.36769
	2.36195
	2.35811
	2.35742
	2.35678
	2.35548
	2.35271
	2.34911
	2.34665
	2.34359
	2.34359
	2.3418
	2.34168
	2.34054
	2.33968
	2.33867
	2.33772
	2.3327
	2.33041
	2.33021
	2.3289
	2.32876
	2.32803
	2.31145
	2.30663
	2.30575
	2.30557
	2.30181
	2.29778
	2.29428
	2.29385
	2.29031
	2.28831
	2.28325
	2.28321
	2.28251
	2.2818
	2.28159
	2.28092
	2.27921
	2.27827
	2.27778
	2.27435
	2.27091
	2.27064
	2.26515
	2.26285
	2.26211
	2.26176
	2.26163
	2.26031
	2.25567
	2.25549
	2.25528
	2.25247
	2.25206
	2.24866
	2.24778
	2.24742
	2.24258
	2.23847
	2.23435
	2.23402
	2.22895
	2.22677
	2.22531
	2.2239
	2.2228
	2.21912
	2.21831
	2.21745
	2.21494
	2.21319
	2.21068
	2.20604
	2.20411
	2.20261
	2.20093
	2.19923
	2.19843
	2.19836
	2.19626
	2.19426
	2.19303
	2.19279
	2.18037
	2.17794
	2.16987
	2.16966
	2.16388
	2.1632
	2.16242
	2.1594
	2.15727
	2.15683
	2.15598
	2.15417
	2.15008
	2.14634
	2.1442
	2.14403
	2.14181
	2.13681
	2.13613
	2.13578
	2.13454
	2.13416
	2.13115
	2.13086
	2.12708
	2.12458
	2.12098
	2.11948
	2.11872
	2.11443
	2.11324
	2.10886
	2.10535
	2.1019
	2.09821
	2.09763
	2.09728
	2.09648
	2.0958
	2.09498
	2.08924
	2.08918
	2.08581
	2.08436
	2.08025
	2.08009
	2.0793
	2.07831
	2.07698
	2.0695
	2.06912
	2.06694
	2.06515
	2.06443
	2.06353
	2.06296
	2.06092
	2.05911
	2.04144
	2.03986
	2.03617
	2.03475
	2.03014
	2.02903
	2.02413
	2.0171
	2.01107
	2.01073
	2.00556
	2.00269
	1.99332
	1.98302
	1.97363
	1.97195
	1.97111
	1.97051
	1.96944
	1.96815
	1.96782
	1.95616
	1.95518
	1.94646
	1.94548
	1.94087
	1.9384
	1.937
	1.93662
	1.92922
	1.92908
	1.92558
	1.91205
	1.91198
	1.91101
	1.90417
	1.90229
	1.90077
	1.88372
	1.87891
	1.87785
	1.86495
	1.85816
	1.83434
	1.83232
	1.82599
	1.82035
	1.81862
	1.80546
	1.79139
	1.78079
	1.77843
	1.76154
	1.75711
	1.72673
	1.69146
	1.68519
	1.64576
	1.634
	1.63157
	1.62332
	1.5699
	1.52226
	1.51279

## Sheet: foci intensity
WT	McdB[-3]	∆McdA	∆McdA + McdB[-3]
4991	11907	21820	6828
3826	9035	2900	7042
3863	3934	28902	7078
20631	3997	11566	4393
12485	24336	9603	10315
9402	9682	9542	2829
8827	2668	3078	2858
7578	9141	2596	4691
4642	8456	20068	2969
4927	3823	16882	3100
2818	3905	12853	2644
1992	3070	9383	2591
17871	16076	7382	6500
12019	7657	7412	5650
8100	13175	29420	3749
8681	5264	2896	2417
5297	4688	20055	16444
4725	2764	19100	5478
4121	13745	9953	6513
7703	11199	7370	4801
7999	980	15953	3422
7465	17720	14955	3932
4289	8964	11163	3357
3870	17684	10536	10872
2390	9078	9094	8507
2188	1272	5981	8209
12032	11922	6540	2664
5747	11324	5056	4450
4718	6095	2495	3767
1958	5878	29142	2009
9738	15513	7998	1435
9249	14804	4718	3205
2943	12248	9155	8621
1819	13652	8281	5594
11415	8937	4035	4159
11836	8485	19979	3950
11831	8345	11067	9263
4900	20006	8709	9130
3647	4589	6727	3411
3501	2555	4863	4877
8187	15841	25515	3429
7091	14654	23106	10430
7554	12688	20364	7636
7222	13513	14302	7653
5903	8317	14159	3063
12454	7715	14714	2509
6223	6370	3912	10199
5549	21637	3663	7071
3176	10757	11607	4693
14927	14049	10210	3545
9427	9374	3524	3080
6660	7714	2612	8561
4002	7342	30507	3843
8127	7563	21054	8988
4541	4407	16251	8512
3896	4379	12596	6785
3351	3803	9089	4175
10504	13310	3927	6891
9464	12750	29626	4577
8217	3871	15016	2585
7957	2736	10291	10368
7142	12024	9496	6753
6791	8001	9661	5552
5046	6855	4047	5556
5331	6299	21619	4718
4800	21286	8865	3332
1852	22224	8458	2642
14742	3396	12982	4597
7914	1386	8379	3327
3102	16891	5008	10558
19112	12581	10667	8000
6807	7213	3076	4738
5455	4782	14272	4132
5695	3695	11358	17015
5194	2816	7292	8341
3709	3830	6798	6163
12499	1580	32123	4020
3846	10596	15818	3398
13429	8802	13131	3324
10990	1957	4358	5039
5436	10092	25499	2582
4745	4570	9275	2724
4016	3654	4760	5610
3647	2579	3723	5504
13093	11981	20630	5299
8451	9241	7044	7537
7817	14029	4870	6546
7083	3056	17789	4911
5894	20148	6193	3158
7900	12415	3381	1894
5879	8523	3002	7697
6000	6035	17817	6573
4490	5710	6608	3478
4547	1923	4797	3153
2592	22422	3904	2627
13763	8977	3256	11266
14002	4180	1488	3258
12370	3916	32202	2663
8844	16532	11910	10147
7289	1675	5700	7944
6930	8553	3760	3639
5043	7873	37383	5385
10237	5536	13010	4536
10231	5816	12143	2991
7256	5587	7526	4460
7100	8905	20698	3729
3109	5591	14750	3183
9710	18849	9900	3427
7269	15044	16245	8465
7394	12900	11257	7367
6515	11863	8076	3327
5731	10759	6137	7233
3060	7245	4902	4105
9296	19924	16368	4292
7628	15508	15868	4580
6874	12700	16470	3984
5938	11837	5261	3676
5290	3575	20790	3484
5027	3036	14908	2906
5179	16172	7190	2685
5241	13328	4219	8784
3280	12097	2146	5824
2745	12010	26424	5712
12221	2629	9009	5377
10461	7570	6816	3891
8523	7402	7029	3808
7327	7196	21167	8248
4580	7053	13273	6436
3960	2113	4038	4427
8079	14326	19415	4054
7462	11490	18462	3768
6079	5078	5186	5353
4778	2301	5483	2483
3128	18245	11719	11114
14455	18555	9376	9547
11614	17130	2672	8725
9677	20965	24802	4347
8827	12275	21486	4525
6067	12392	17976	2194
3958	11099	8822	7139
17993	10557	12632	7979
9291	7444	10688	6376
8438	18243	15861	6107
7657	9627	12109	4121
7085	7442	11142	2422
6265	11054	5336	9986
5316	6648	2667	9222
4577	5577	28088	8612
2518	4918	13114	5226
2130	3647	14478	4023
6878	4791	9022	3879
6064	4187	7924	3910
6005	2056	7034	3068
5873	8408	6453	2707
12287	6933	15024	3041
7469	2442	10082	2974
4336	651	5080	2544
3590	10548	16216	11205
1972	9200	14003	2938
10025	5929	7882	8854
8260	1754	7997	5889
7898	1872	13474	4670
5277	4689	10214	4367
4781	5054	9558	3622
3812	2906	9031	1795
3198	19628	6985	7828
16081	11337	5715	6367
14992	10171	4931	6323
8527	15997	4078	5947
4914	7847	13408	3406
3773	10326	11022	3245
3667	16024	4062	16342
3828	7361	22849	14945
3122	6500	11096	1761
11570	15475	4817	7466
8368	7177	8704	7288
7733	5023	5883	6961
7919	20002	4987	4556
6670	10765	5020	4653
5120	3988	3477	4290
4219	3972	21929	3119
2712	16404	13950	7017
8936	7139	10626	6448
7741	5869	8991	5747
4113	5125	9037	13058
7003	17616	8085	7506
7018	18280	14235	7433
5343	15383	11441	4088
5174	26701	4427	3922
4881	10760	28148	3068
4149	9262	25489	5306
3584	6261	22639	4775
3274	8806	21190	3911
9671	5092	22745	2962
6838	23812	20526	2459
5815	6810	14964	20403
5407	18794	15398	7676
4484	14885	12020	5998
3020	5414	10455	6820
16434	22066	9120	6088
16176	14711	5498	6010
11076	16519	28528	5323
9269	15071	19912	4102
8617	5777	16616	8921
7510	2939	12614	8965
7766	11471	5861	7930
4907	4691	4938	7230
5027	2429	3892	5435
1882	13391	3020	5874
9355	13136	14629	5133
7085	10730	10186	4790
6396	9037	7575	2915
5978	5470	7422	4244
4912	5254	3438	2879
3750	12409	1967	1981
5466	8612	25521	1524
4304	5408	2279	5614
2954	4020	24693	5113
13554	19175	16092	4104
9716	5288	8887	3407
8931	4308	7948	3175
8512	1441	10714	10253
4844	1124	11475	11218
5077	17955	7826	9279
5265	4983	18681	6088
4360	15706	18281	4990
17177	9454	18679	2347
12730	9952	9691	10687
9144	5106	7634	9710
8717	8412	2123	9528
5694	6735	22853	6752
5132	5097	14416	6591
2365	11138	13257	13132
14491	8081	10615	6787
10080	3337	3741	5779
9015	2426	17307	3565
7059	1722	10301	2146
4692	1392	7908	15713
9314	15440	1905	11747
5721	9346	19326	6752
3943	6043	13912	13956
3807	2832	13183	7607
3490	2886	4974	5465
12856	1638	3343	8608
5134	7266	3763	8195
3025	7976	2865	7903
5762	6926	19814	5911
4049	6724	11449	4595
3661	5051	3698	3791
3186	14284	15855	3125
3113	6812	12292	7595
3058	6469	8951	3910
13949	1652	5376	3104
10392	9447	4654	9153
6681	7814	3700	9029
4408	18242	10139	6772
9289	3370	8562	5599
8967	1392	5998	4535
5395	19243	4536	7496
4920	7160	3516	5890
2598	4050	3261	4350
8357	2003	2555	9273
6455	12698	16889	8621
7005	3288	10895	6510
6219	3110	10351	4994
5335	1671	30058	10619
4288	10457	19746	8699
11429	10362	12518	6532
7025	4396	5804	6224
6334	15181	14561	5536
5541	12973	10287	11234
5472	7959	10033	5544
15031	4068	5673	4260
9704	2356	5201	2706
7528	7432	3609	8051
4931	5943	12346	4254
4271	5498	6762	4297
11192	8704	2850	4093
9432	8492	13895	2382
7931	3457	10444	15073
6461	16712	6591	12858
6132	9003	5972	10683
5581	8309	28122	8655
3784	8698	17093	8961
9029	6845	17244	4779
8846	2364	5001	6413
8776	21432	19133	4111
6726	5612	11700	3426
6112	2613	9613	3139
6099	10009	25068	2480
5643	7386	20993	9831
4733	22982	13367	8487
2849	7733	10150	7719
9850	6898	9254	3269
8043	9327	4765	11763
8503	8916	12121	9003
7151	4345	8339	5275
5351	2393	6587	4243
3353	17753	3563	4505
12626	16336	3181	16423
10824	12265	29746	11018
6277	11559	13791	10096
3806	5411	13205	5349
2779	14299	12688	2518
11109	3649	9317	5787
7057	13813	5390	4402
6658	12058	4374	3589
5364	17323	2841	12967
4856	7494	7512	10964
5055	3344	6305	6171
4530	14867	5334	4926
9981	11840	5418	4456
6756	6243	3738	1697
4834	14668	10641	6154
4583	12335	10071	6578
4235	5888	6969	4046
2263	4865	5474	2737
13032	2050	4612	8170
13297	17780	21442	1077
10608	2341	16300	11971
9130	1640	16960	9130
3755	17879	14752	10069
3745	16233	10467	9454
2868	12575	7786	13386
2962	5629	4544	11708
14083	17426	13795	5585
14297	15675	12267	3489
10832	14240	10265	12060
7564	4373	8765	12544
7210	3498	8019	10649
6350	1654	5540	3628
6141	10017	2757	2908
10153	8896	15211	9704
8758	7902	8596	9847
8426	3672	4168	6327
7861	10191	21719	11696
7280	1602	14729	9473
6291	7023	14548	3564
5608	7570	7938	1949
4133	6331	21885	10569
3740	1841	9905	6778
1349	14809	8461	5684
13732	11815	7847	5524
9978	7696	4045	4355
8197	7339	32579	2622
5818	3126	29391	7651
5966	3224	9073	7286
4005	6412	11993	7440
3254	4986	10214	4979
15223	5226	6714	3718
7030	2653	5701	2165
6354	15381	5785	811
6319	3149	5288	10132
2323	22249	3584	6316
10813	17014	12494	6039
6234	6075	11409	3414
4636	19236	8285	3009
4193	17298	5904	2563
4050	6774	2718	4431
15933	3783	2067	2771
12815	14304	17335	1712
11120	11718	12087	6722
8778	11686	5757	6173
6261	7662	2238	4417
6193	6136	36132	3520
2342	4341	15172	2592
13729	12528	11643	1355
8263	6577	5547	9724
7544	4210	22334	5433
5935	3198	21709	5464
13562	17722	6896	3905
9903	10932	4481	2273
8168	11905	17889	5947
3830	9976	11052	3603
2418	6578	4868	3220
12121	3801	4399	2165
8492	4117	3888	7014
5440	9184	3273	5769
4407	9279	28888	3214
11291	4785	13222	5881
8549	2325	3902	5630
5707	1537	13072	9645
5289	5896	13955	7249
4492	14215	13757	5886
9892	11831	11189	4672
6892	10846	8614	3303
6964	14180	5221	1559
7194	4425	4079	12034
5900	25279	3291	8685
4052	24586	11166	6139
8378	21720	10329	5265
7281	12331	7875	5690
5695	4490	8128	4340
4540	2882	8624	4460
3179	15877	4033	8193
10893	14023	4565	7926
9167	2845	2402	4073
7976	2135	10856	3916
7246	10240	2912	3490
4588	9741	2422	7256
3326	1713	18731	5968
10816	16008	16726	3920
8716	10316	9365	2442
5931	4738	8635	1822
1233	2707	4732	1594
1140	2520	15835	7360
8868	18929	12939	12730
6576	11828	12385	5570
5090	7052	4826	4208
4811	3846	24185	3261
2030	1745	11328	2687
10789	10837	8764	1801
5756	3746	14373	21038
4854	876	8390	12061
4875	14831	5808	7330
4103	9865	4816	4020
3430	6281	23776	6216
2473	2299	8042	5464
21980	11095	13485	5044
10827	9710	8544	4244
9763	19776	6648	2655
7868	2419	5991	11598
3183	10580	25816	10368
9318	7503	18835	10215
6279	3945	6111	4108
5898	18764	27353	2964
5640	17146	15058	1441
5071	7471	12329	16136
3002	15290	11377	7738
12852	12202	4134	3652
11370	2347	2572	3113
8305	11482	12378	17008
7302	3245	8499	9273
7657	1518	25655	7817
6400	23765	27149	3871
5240	22155	6377	15750
3948	19868	4378	7775
10415	3504	11720	7251
8938	3896	10362	6673
8758	2308	4094	5678
6776	2311	2149	1804
5221	1859	15742	4328
5144	14556	13097	7720
2369	11545	11340	7363
11041	11424	10401	6424
7119	9768	8391	4525
6048	9264	12456	5124
4397	3791	9485	2881
3281	16723	8329	8608
13507	11458	6800	8380
11847	8052	5388	8342
9813	7317	5045	10910
9390	4870	4562	7719
7967	10355	18463	4966
5890	9157	14838	3064
5501	4648	15687	4926
4303	3638	7170	5223
1912	14653	15917	4570
11170	3310	11103	10487
7172	4548	14554	6541
7066	3867	12028	4333
6538	8062	11296	3195
3185	2132	6646	2793
15788	21081	4207	1927
13062	10006	3677	1826
9500	24603	12096	18150
9739	11816	3895	5614
8477	12696	2831	5834
8223	9885	15646	5169
7152	6707	12872	2893
5937	2695	9592	12323
12440	1113	8928	4118
8063	16977	11299	3842
7264	14727	8320	3521
4307	8647	8619	3186
3446	6595	5990	11025
15843	3214	5580	10789
12973	1938	4660	3343
6706	2082	36434	8806
6198	6929	19836	4282
6285	4738	9474	2605
3002	4090	5895	9197
10509	3255	2816	21894
9496	5744	18795	10152
5919	3639	14186	6931
5193	10199	9733	7498
4709	1462	10311	6411
4034	14093	6143	6773
3433	9255	4770	5033
9598	9598	4429	4635
8862	5092	19256	4401
7319	2864	19020	3668
5134	20613	15645	11261
2208	15016	12100	6971
10339	4878	11511	5343
9914	3392	30804	5729
6057	3110	20773	5435
4886	3351	5911	2066
10457	4388	4947	10207
8502	4353	1871	9237
6840	2225	20232	8201
4733	20034	9061	6030
2968	12103	4882	4699
2476	11314	4672	6544
18515	17350	23112	4584
11705	17609	9716	2871
8636	4029	7717	12603
8141	11692	19617	10599
7574	11442	9951	9399
7122	6276	9481	5502
6785	19169	6256	5165
2436	12519	5754	3635
10635	10987	3699	3158
7388	7277	22320	2948
5741	6364	16840	11095
4672	4169	9639	7020
3059	20708	5850	6050
2948	13238	9561	3463
7045	2050	6203	2781
7002	12451	6116	2638
6240	12024	3891	2672
5840	3509	26741	9499
5336	13314	11901	8614
7127	11082	6244	2961
4880	5732	23985	19805
4077	5261	11773	10817
3735	15636	6190	9844
13621	11011	25631	10299
13213	3022	6772	5681
6918	17733	4775	4279
5195	10738	3768	2137
4794	16193	3741	7404
3982	1947	10797	4982
3186	8632	9340	3786
22193	4536	13309	2198
12264	3179	7197	13701
11657	2113	6345	11965
10667	1800	3227	10929
7425	14781	2637	3401
6167	12121	13153	3016
5414	9781	5040	8305
8750	6134	3820	8470
8478	5880	31308	4919
7422	11850	19211	2611
4457	4465	13891	15324
11575	8865	6618	5893
9611	2700	4509	4117
6408	9265	13744	16955
4957	17230	10827	6878
2527	2456	10202	4210
20620	4414	5385	3590
9627	4979	3661	6876
9155	4161	22778	5713
8095	2642	10699	19467
7390	1229	9427	19702
7609	8865	9269	4238
5429	8271	17268	9224
4086	5900	12583	7572
2580	4833	7502	5655
16071	4018	6807	5754
8728	3795	5921	2046
7183	1273	15460	7658
3859	16343	11300	5427
2646	11438	9655	2468
1869	11514	21334	3389
12817	2028	11421	2409
12060	1951	7648	14920
10069	8961	6092	3719
8576	8998	17019	2114
10530	7107	12227	16617
8725	3175	9143	9879
8310	12367	6800	2828
5995	8651	4323	16170
5371	3243	25248	4850
4823	11630	23038	4344
2793	4347	11293	12302
11014	3572	10149	8641
8550	2944	20122	4966
8112	1606	12681	2619
8578	5403	10099	12461
6860	3124	5425	9083
4966	2739	4606	6477
4393	8190	31866	11286
8288	4732	16656	9436
6543	3920	6406	7732
5097	11618	11435	4401
4452	5237	11429	4137
3625	13370	7831	15260
9407	7062	6335	12786
7617	9350	4964	4127
7527	7328	4499	3483
4887	5798	19293	2925
4121	6120	12370	13638
14532	6309	17336	10354
11603	2987	8125	9404
10838	10354	7629	5613
6638	7275	7200	2711
5023	6079	7316	9789
4240	5184	5659	9679
11182	4643	2576	6170
10004	14521	7247	5617
8257	16316	5209	4878
7685	14860	4210	4039
6117	3153	2376	3515
6339	2399	19073	4176
5879	9907	9651	2505
3430	3009	26667	10434
18393	11046	21617	6456
10600	8173	16562	4161
9751	2645	25578	3947
6025	12962	8535	3815
5593	7146	12986	3197
4151	7211	9752	11216
3779	5827	6514	6823
14041	4653	4481	4989
12089	3231	19375	4401
10476	11991	9029	4266
9730	9384	2522	6047
8183	7656	22293	5444
7351	5891	8844	5483
6392	1849	4710	10290
5575	1412	3702	6897
4766	3969	7513	4563
10958	3024	7622	3988
7023	12000	7451	2989
6775	12208	14343	1977
5659	8639	13442	5958
3446	7274	12894	4931
2312	4821	10473	4985
14456	4461	8332	8430
13518	1490	4456	6044
7519	6957	19775	6140
6481	6693	8145	4974
6152	4415	6704	21668
4868	4340	3377	12793
3939	10586	18495	11496
3467	6851	7014	10684
10662	1238	6296	7406
10750	18441	3507	8290
7926	18759	21885	7901
7003	6562	9191	6746
6259	5989	8719	3266
5724	8863	2647	3085
5242	4031	18025	1819
4653	13003	15769	11626
4075	4723	7968	9140
4344	2651	6770	5876
12630	17858	6641	5330
12855	7448	19369	5484
11849	9600	7562	3574
4819	6388	3759	12679
4348	4960	18106	10151
4880	3535	8242	6331
3596	18373	6057	6327
11483	9210	3487	5504
10333	4076	26322	5878
8374	18870	21403	3453
6755	3903	15751	2149
5537	8053	6987	18142
4053	3505	20911	12177
16089	2541	18511	10929
12310	12592	10781	7314
8229	8361	6001	5551
7588	7244	3695	11080
7249	3350	14678	12001
4501	3693	8076	11464
9198	16468	7319	9945
8447	14679	23774	10015
7697	9143	7006	9419
6347	3517	7338	3663
14424	5610	4091	15866
8938	9644	3602	10702
8293	7258	14524	5639
8075	4929	11520	4759
6564	5340	3376	4196
4625	2295	14100	2403
12588	12690	6807	15653
9717	3635	13544	8343
9094	3594	8454	7348
6770	1532	8794	6853
5742	17023	3969	3751
4652	9816	20866	2816
4957	2275	7168	13504
15293	12495	6455	8143
8824	11083	4057	7725
8795	5558	26847	4453
8909	4632	12921	1637
8277	15460	11100	6880
19257	6460	3406	6952
9013	10752	18231	7013
8617	10577	3717	5978
1850	7122	3253	4627
12534	6618	1716	4774
11418	6314	28954	4485
9870	1239	17331	4277
6910	6045	8844	2889
5666	2119	4637	2602
3034	12392	9796	13458
2932	4878	10413	9697
14756	3463	6471	5073
9497	5912	4129	3880
8644	3040	14413	13729
8467	12975	1736	6297
7492	12893	17841	5819
6850	2489	15959	10615
4417	14401	10429	7820
2357	9276	9783	7137
10425	10413	6256	3118
9772	9737	4328	2536
7280	8018	3322	7595
4257	19791	18592	7458
3319	10550	9017	7154
11767	13540	8189	4156
10852	9079	7992	3681
8945	2668	6462	4441
6287	12351	30505	10312
5523	9833	3772	10760
4757	13777	18134	10950
18257	11513	7204	9844
11009	1621	6547	3737
7842	10615	5508	3069
5102	10020	8797	1675
10728	7295	7130	4731
10526	6339	7000	4830
11141	5488	4625	4149
7297	3096	4241	3897
5854	2216	3834	21256
2781	9824	22196	14726
11972	5237	19789	11277
11275	5317	8892	4772
8068	1628	6588	4465
8114	19508	3746	6196
6156	14484	18240	6089
6503	13141	13507	4924
3264	2962	5239	4547
6972	6497	4844	4641
6767	9628	5074	4535
3636	1431	2637	3184
3729	12045	23845	7930
2395	13377	24220	7180
17430	5118	11473	5917
17462	9359	5508	5291
11729	7433	2911	4283
7858	4493	18071	4068
7388	1935	7439	7007
5822	3495	5868	6636
5188	2319	13442	5692
11524	18502	30666	5405
9094	2242	6937	4559
7752	1298	14098	4244
5952	14634	7580	1422
5798	11729	13550	5955
4687	8593	7213	4601
12997	13333	2794	2111
9978	3115	15492	10388
3917	5645	7507	9725
3414	2453	5603	5920
16470	17472	4321	4805
12083	20117	2415	5183
9287	2295	28609	8868
6351	7517	11245	6789
5939	5456	5437	4920
6381	5661	19316	2319
5587	13511	6126	6130
4099	11477	10120	2398
13563	7992	10490	1796
9912	7611	7557	15843
9645	7757	3034	6037
7800	5209	18213	5713
6579	4008	19301	1343
6543	2150	14391	12868
3244	5810	14868	8708
10354	5651	9148	10170
6590	1468	9600	5972
3373	9754	6656	5440
3367	9503	5060	2768
2611	5967	3766	2189
13875	1456	19019	7892
13435	8003	7359	7418
11830	3526	10538	9412
6263	2756	9043	4391
3556	7533	7847	4300
10452	3622	7786	3382
9725	10927	5187	12855
9707	11468	18317	8718
8926	7923	17110	8381
7356	12851	4146	6743
4635	3049	20730	5267
3679	2975	16066	3099
12035	17656	11171	12974
9925	5233	9619	11572
8422	3938	17948	10202
7054	4143	9030	3340
4581	2427	22536	8520
3776	8364	12066	6761
2764	3970	12625	3741
10245	2322	4069	2290
7689	2106	3664	11701
5546	10741	16177	8693
2361	8290	8881	7239
15676	5619	7550	5493
5019	8530	4666	4306
4790	6624	3728	2777
4188	5830	12208	9357
10957	13737	7157	4672
10817	11148	4833	3922
8712	10193	29545	3160
6370	6465	10621	6338
5152	2311	8231	5891
3509	7805	10057	5157
16929	6053	7502	3495
17321	4316	5346	3494
8786	1365	4679	2834
7685	15259	4441	2078
17103	7673	3400	4866
7334	5306	26263	3715
6120	1226	5135	3100
6190	4481	3838	10391
4707	10170	20501	9748
14019	8838	20161	4905
10703	1527	9321	15605
9876	15031	7723	8104
10213	7107	6505	7891
9897	8931	5165	5097
7463	7413	21402	4270
7291	5399	10702	12905
7002	5193	9871	10916
4517	4935	2507	6272
9227	15100	19813	3183
7267	8730	3863	2798
7004	5809	3331	10633
5767	5280	14370	7764
5637	6277	11561	8133
5104	6936	11021	4292
12319	5856	8258	2614
11854	3951	6596	13681
7629	1608	5750	11500
6836	8029	15632	9460
2183	4258	9148	5986
11859	18259	8965	4078
2946	1197	2261	13889
14490	21482	11217	11452
14485	8673	10911	5406
11575	7744	7117	3651
11914	7520	5129	10640
10738	8125	2976	7504
10271	3541	9031	9275
10000	2266	7438	7875
7274	1755	4228	5778
7197	20209	2133	5743
4983	8501	11028	3645
4708	8352	9470	13801
3563	1014	6614	11571
12623	2517	4998	6962
9171	5988	18569	1998
6191	2411	18396	2161
3477	10561	4395	7411
11466	5155	3348	5247
10928	4719	21731	4799
8650	8648	21744	4572
6882	8692	13751	2796
3557	4514	9674	13545
3503	6492	4528	10964
3470	6189	15462	8493
15971	1900	13119	6755
12298	1466	10732	6031
10130	7897	11361	5082
8638	6485	7392	2588
7719	5090	4191	13354
7679	4127	2073	9037
6453	3425	6580	7286
5511	20526	4630	4599
6145	18096	10236	2031
4116	4731	9640	16147
2396	7536	5608	7819
14772	7790	14320	5340
10317	3075	14855	4027
9644	14105	8275	5224
8770	12680	7507	3885
8337	4384	29708	3540
7300	3420	25822	2448
4845	2104	14508	9052
4344	6303	4424	5920
3654	5469	2342	15769
16494	3462	11680	6552
12632	2508	12376	4251
8467	1634	9537	15172
6212	1218	6128	9478
20415	5827	3247	8148
7250	6168	11486	6786
6361	5471	10143	6892
5752	10119	8433	1724
4980	4459	5922	9856
2547	841	25374	2000
12804	6846	2492	13689
7585	6231	10676	12551
6617	20389	6538	4988
3967	11833	6310	4189
2665	11522	5356	12490
16346	4588	3513	9902
12996	4487	3050	7650
7115	1884	12972	4986
6924	1077	9912	3172
2461	8283	7769	13587
8872	8885	7514	3702
9158	1755	6019	10654
8722	13156	6402	3972
8483	7546	4441	2902
2769	4617	4159	2015
11547	8334	27216	6521
7235	7650	7932	5880
6949	3433	2632	3010
6579	8441	12683	2572
6279	8457	12050	8853
5484	5041	7878	5010
4315	5971	3203	4032
3102	4562	1890	3801
2122	13219	12372	3865
15392	3858	2680	2085
12890	3907	2840	1526
7882	3340	16281	1464
5250	2536	10089	15085
4015	4182	3511	12257
11245	6480	13866	9729
6434	6439	9985	5503
5949	5532	7659	4348
4665	3145	6021	15347
10116	8796	17311	11784
9524	8872	14632	6817
8498	7350	6216	6642
8522	8375	3641	4672
4055	5351	40871	11915
4072	2344	16075	9173
3557	10861	7871	5916
2495	10703	3803	5346
13679	10607	20105	3801
9273	4583	16741	11441
8132	2241	16197	9445
7171	1574	11312	5645
5635	11511	7971	4532
5706	11672	7105	3006
5232	8604	5428	2545
7709	8784	3296	28685
7415	5800	19266	3094
6705	4630	16379	4829
5438	7503	11645	3530
5570	2332	10538	2446
4740	2206	7788	2066
3912	17969	6357	7660
10767	7086	5145	7758
9790	6368	2565	6757
7827	4627	15038	6007
7409	3933	13111	5709
7551	1384	8465	4192
6262	14501	9964	3906
5649	5817	6376	2613
3715	3729	5998	9857
3774	3427	5621	6672
2388	3199	2874	7016
10815	2255	17213	6384
8825	8230	8955	4108
7492	3646	8350	3111
5267	3025	4051	3171
13795	2400	3890	9129
10687	7792	17115	7374
10273	4403	15970	2695
9855	3593	11677	2701
8661	2838	7497	10534
8085	4937	6426	8568
3604	5182	3048	4163
16276	4746	5740	17323
13562	6424	3008	11600
7942	5467	2691	16985
7105	4643	18010	16759
6674	1284	9704	6794
4266	1502	4320	6278
4484	11273	9461	4945
3188	6103	8579	4338
10068	5726	7539	3733
8232	4003	5893	2824
7805	4001	5307	1661
7943	11697	14766	9410
4929	3596	4488	8807
3961	3092	4757	7754
4243	16069	20905	1250
2907	8253	15256	6832
10861	8541	13284	6954
7081	4074	3359	5851
6092	3522	16941	5744
5424	12244	10850	4656
4595	10594	9076	2321
4694	10438	4626	6163
4584	6459	10940	4728
4411	4894	10074	2650
19119	10832	10297	14567
11205	11521	9511	9268
6304	8204	6069	20368
6374	6511	4422	10127
5216	4793	4080	10171
3317	3319	2364	6085
2791	1722	16899	4059
2993	7551	12170	19073
16797	5840	11437	7424
13952	15426	10023	8166
7448	6589	7580	3607
6706	1360	7521	8971
6369	7993	6396	6978
6070	7853	17244	5917
5066	4897	17387	6891
2558	6446	10075	5400
11909	2702	12505	13914
10469	5290	10370	12768
3923	2476	9978	6312
3898	10553	8455	6106
2402	8970	7992	2596
8694	8513	7138	8898
7391	2596	7404	5521
7502	13105	7572	3898
6177	1763	20758	2751
16085	18895	8419	9659
13009	11696	28848	9497
7702	7726	15368	7788
6879	7104	10523	6991
5751	7231	6212	6251
18037	9196	5878	6306
6058	4432	5602	6133
4446	13553	16602	14643
3795	10692	10720	2655
13802	2404	8134	8855
7088	14576	5436	8731
6562	7391	4880	5755
5491	5520	3299	3163
4397	3634	14859	9738
4595	1775	9535	8598
7350	13594	4797	7957
5982	5422	4669	6610
5755	5036	25677	2828
6026	3592	24591	1692
6135	2142	7188	8906
5639	7861	14062	5824
5404	2884	9920	2061
2192	5180	6872	10214
20052	4493	5405	8141
10511	3374	5179	4632
5617	9950	18746	13187
5527	8030	9923	8928
4575	4546	9060	6608
4524	8378	7051	6132
4327	3112	4808	4944
3528	2779	4681	1959
2733	4672	1675	1660
2052	4405	11609	10528
17515	2209	9546	8152
10082	9955	8002	8691
6567	9431	4194	7235
4914	5338	3979	6010
4353	4316	8100	3028
13590	14482	7487	15668
7439	3779	6703	9758
6449	2442	5763	3679
5040	5616	4480	10297
5435	3238	25083	7850
5689	8405	17089	5786
5582	2505	7458	4332
5529	11045	7093	13715
3941	9853	17970	7983
3918	4064	12858	7172
1313	3749	6724	5659
14441	2479	5067	4326
11260	1733	1981	3292
6068	8465	12772	3267
3743	7068	12592	12536
13800	2843	11237	12393
8611	7750	8850	9379
6567	6600	14039	7505
6528	5542	9835	6446
15371	4728	9310	5978
9994	3951	8714	5664
4781	1584	7982	6026
2854	5704	16691	4701
2971	4887	9276	4722
25993	18413	5464	8215
10110	15273	3728	6224
6302	11939	23619	6324
4605	3440	11548	6278
4593	9338	10479	5818
4247	5784	2709	4664
4430	4932	29358	11362
3478	8970	25440	9241
15971	3989	26317	6612
12284	2316	8805	11936
11500	9464	15289	1366
12907	5520	11701	16360
6864	6007	9588	5503
6336	6906	18751	1314
4706	5095	16778	13322
4088	1354	12405	12488
3534	9369	6085	8000
11627	8548	4932	3356
10679	3161	4001	12731
11112	9681	15717	11290
8303	4708	12405	8973
4437	4394	9621	7026
3883	11899	7537	4326
9253	3369	14475	2695
8067	3478	14415	21916
7663	3073	14909	17012
6916	3270	4526	11293
6423	10693	17100	12365
2662	2110	11051	8970
9115	4498	5606	7350
8969	15478	20086	5768
7504	13815	8641	5866
7356	9855	5375	6668
5722	3661	3853	4525
19807	8244	13835	9926
6408	3373	11376	6335
13456	1398	8721	5521
7091	3820	8726	5414
6043	2097	7343	16652
5502	2283	5382	12749
4998	4285	23259	6486
2938	1364	20034	19243
2229	2156	15716	9159
22947	2010	8716	8977
9240	1804	7005	14021
6800	10964	23631	7511
3953	7835	14530	7242
6860	14187	9352	4358
6379	4222	9662	3213
4446	5340	7679	9701
3921	10564	5497	6573
3555	3312	30131	4548
11192	17476	4895	3839
10828	1708	11960	3323
9588	7813	11602	10413
8378	3682	8674	10382
7749	7438	8220	7586
3473	3699	5754	5810
16239	2157	5568	5775
12653	9031	11356	3468
9704	9299	6021	8754
7312	4763	3936	6137
6191	13346	3407	2647
14327	9227	12097	20569
12299	2461	10747	12948
11042	1688	8013	9847
10406	7536	4541	8242
3906	3028	3415	12443
2732	2937	15970	5026
14288	7831	13517	3276
6476	7466	12992	11380
6336	4897	13056	8507
5626	11806	12580	7678
4746	8805	4552	5962
3342	5303	2847	3230
12843	4769	21966	1276
7206	11333	20373	15805
5718	9625	15277	6905
4799	8442	2694	5292
4702	6923	18376	5638
4541	4036	18865	5949
4140	11130	15452	4802
3708	8334	9796	3556
3433	5466	11335	3489
7850	10635	7513	2328
7483	6881	6932	1401
7349	1687	5579	9333
5375	2998	3702	8736
5070	2564	3151	7213
4947	17296	2271	8363
3800	12521	17146	5366
15094	4602	5012	4410
14149	6253	3102	2090
9876	2569	29838	6023
6986	12525	24260	5062
7075	5161	17367	4435
5893	2495	16218	3235
4335	2128	10478	3208
14615	26241	9740	2335
14796	8673	7319	10356
11411	3527	7361	9579
8905	3452	8090	7373
7385	1983	5407	2969
7084	2090	4614	1668
3692	6296	13392	12076
16132	6309	10928	7434
9801	5161	5502	7317
7788	2129	9198	6236
6671	12955	8388	4710
4114	1722	7476	4990
7173	3005	1937	4655
6904	1530	1915	4063
5688	3758	14790	3557
4245	12132	12486	1994
11641	7304	6022	15529
8309	7111	5452	8359
7356	6985	4920	6885
6925	2572	2506	5018
4917	8172	14604	1497
17421	2428	12022	20089
10883	7422	10280	15137
8623	4374	7315	11144
8332	1958	4166	9805
6602	5233	17008	11139
3666	2540	14728	6237
16857	1681	13876	3368
9917	4037	18390	11020
7401	10604	14445	7222
4239	5141	9373	5313
3729	8981	8790	4348
3527	7352	22193	4206
2753	6097	19559	4036
23798	3280	7404	3587
7590	4633	3002	16072
6568	1685	16621	16032
6778	6714	8338	7319
5807	10524	7715	6170
3900	6800	11369	5547
3684	6081	11279	5497
2523	3523	9682	5393
2399	4534	7592	11600
9902	1762	5205	7617
7180	5701	9585	5469
7297	5352	4866	1939
4811	5029	4551	19012
3580	2552	21906	4021
2555	1499	6388	3648
12067	3909	3886	1698
12001	3877	13983	12036
9920	2318	8516	11286
6510	6168	1800	9622
4577	1349	20012	9323
3710	2949	14577	7239
3653	3931	3803	4155
2587	5104	11663	24175
10926	8598	9561	9722
9271	8627	3899	8621
7015	4558	19266	5855
5416	4225	9972	8120
5948	2732	8812	7153
5087	2733	8947	4982
14392	1734	6496	4288
9019	8047	5889	4372
6640	7473	4995	3548
5958	6094	22751	10265
3958	4588	5635	6020
12201	3674	21655	4994
11508	3832	17389	4182
7514	2718	13057	21126
6021	1855	6893	14601
4890	4993	22131	7091
11780	3905	13238	11101
8154	2125	3783	10038
8011	1792	22959	6081
6161	1683	20450	5196
5363	1534	4948	8711
3156	3549	26439	8061
2595	2568	22899	7233
1940	9237	10811	7137
20293	2846	9970	5257
18406	4664	9392	3505
9246	3149	12710	3749
8556	1421	9217	14617
6821	4679	5258	14249
15853	1805	4004	2534
11249	6992	20584	17156
2420	6899	8360	15294
10117	2767	7548	4485
10663	2646	6539	4066
9271	6796	21588	2428
8424	4716	21744	4554
6334	1678	5350	2694
4807	1662	2785	15890
4282	4172	28560	10736
11054	7157	23490	14088
10656	4561	8693	9820
7870	6923	6693	9208
5933	5534	15764	8476
6128	5200	11564	7214
4929	4757	9833	14572
2987	3661	4885	9584
14986	2460	11692	7760
8938	1623	9755	7045
7812	6339	9587	5745
6695	4660	5337	23064
4400	2308	25163	5046
4120	10651	8735	14303
2894	3828	8834	15073
7570	3203	6978	10171
6176	2674	6037	4696
5388	7192	17601	3975
4838	994	16294	2945
3393	6707	13322	7311
2325	4055	9691	7676
10334	2855	10032	6633
10208	10211	4409	3132
9340	8882	2698	14357
8669	10204	21386	10137
7888	2637	13298	7408
7471	4195	32375	1916
6287	3953	19890	3798
5359	3330	3447	3381
2616	2164	28330	3930
2342	7452	11674	3204
10948	5970	3567	2649
9585	4850	3403	5655
8457	4369	13753	5442
7047	10077	13984	5077
14636	5352	12066	10181
8836	22024	8886	8137
6649	20411	6678	5689
6521	2193	5682	9742
5954	15768	4976	8519
19251	3873	2000	9002
14545	1334	17025	11109
5194	15732	14329	4851
2325	15090	7158	3822
10063	9809	6025	3987
9328	7649	3412	3398
8017	19260	2987	10066
4779	13014	14926	9478
1655	12742	6017	7250
14436	12192	2899	4391
9344	7474	15658	7209
9216	1754	8561	10588
7206	13315	2089	8539
6849	11242	23202	6913
5120	16312	27121	6840
5350	6655	21225	4497
10084	5031	10777	4198
10768	18765	9935	6679
9232	16586	12881	5696
9315	13204	12569	6496
6705	9747	2238	2437
6370	8198	3784	8272
14404	19759	3113	7406
14026	15498	22723	6543
8425	7398	23473	5921
7202	6502	4806	5363
21243	11178	25452	4502
15516	9927	15450	3034
8299	7634	8396	2786
7800	7923	8182	10784
5769	7111	5767	4422
5099	5224	5941	2522
4795	23665	13209	9850
15256	10260	6898	7105
8544	5948	7065	6422
6549	4534	3264	5367
4875	8349	12800	4874
15025	11548	10378	5093
13380	9133	4075	11830
10730	9714	3327	5926
6582	7175	2510	3632
6039	5252	2238	3736
3925	24578	12529	6019
3294	5937	11506	4899
2792	28785	7693	2973
13317	4758	7604	10517
12851	4800	4946	4237
9315	3992	4885	3822
8800	29279	4174	9467
7608	4831	2931	5812
7503	18033	1536	2819
6735	16696	14597	6149
5303	4028	10700	4215
5454	3481	9386	6951
15048	2511	26232	5792
10828	21376	8706	5432
9869	10022	18498	4897
9171	19461	14509	5190
2239	11022	13569	5877
12317	10604	3836	3480
11130	5684	24142	6134
9769	3993	15065	3212
8788	1142	37152	3191
9882	9355	15552	4083
7942	7234	11038	5212
6985	3315	7554	4604
6332	1050	18233	3513
4075	14643	6275	7678
10773	12768	5681	5919
8229	8693	3436	4853
7691	11542	10885	4244
7646	8526	11321	3648
7269	7470	8765	3385
6524	6703	9507	1388
4891	12378	9098	16080
3174	8145	8257	14398
2605	6030	6863	12021
11287	4353	6695	10760
7939	4507	6167	9169
6500	3339	5031	9021
4816	7727	3573	5745
4418	5963	8882	4504
2562	3766	4999	4433
16198	2650	3089	3045
13279	18282	19528	15560
7198	18572	5582	3557
6384	22887	5524	6566
6241	5793	3192	6298
14722	5101	8946	4631
12774	19582	8059	2808
7336	11239	3242	2884
6436	3759	2864	12735
6826	1377	2362	11404
5995	18182	6472	5491
5820	18546	2195	4338
4964	16387	10992	4117
14687	9387	7786	3667
11835	2238	13071	2172
7452	8825	11972	5179
6790	6646	12092	3751
6492	4370	9244	17326
6479	3464	2742	14714
2812	10382	16205	7569
2588	7481	6145	4914
10995	3409	5177	1947
9686	1526	12856	4530
7840	19460	10193	6267
6793	19071	4596	4726
4410	9437	14055	11689
4425	1967	9891	11294
4079	19746	7570	10525
2626	4740	6546	9542
9840	2781	10975	3575
9402	19767	9165	2807
7884	2258	8619	11314
8051	1110	8381	5363
6754	6969	5300	5673
6401	2267	9999	4198
6258	14877	5312	6590
17788	12835	3752	5169
9597	8643	17684	3369
9050	9195	6152	3379
5112	9625	18492	1792
5263	3547	5147	1747
1806	3004	12741	7465
9675	23559	6089	6107
8733	20275	5247	5490
8277	10139	4450	2661
6696	4029	13670	5443
5280	2731	11654	4364
5691	2708	10644	4010
19994	2704	10282	1766
16997	8605	8435	1391
10125	5606	3304	11358
9440	6536	2866	4316
7584	1362	31715	3635
11398	18848	16790	8053
10949	16032	7008	1660
7461	12407	5319	13035
7017	10492	2237	13405
5426	10907	18223	7674
4486	7686	9940	3436
15089	5036	6576	7817
13039	5488	2529	4321
9191	3363	22275	2641
8561	8201	11963	1929
5122	8488	9840	1674
3741	6578	5685	7441
9913	3931	4471	6016
9234	5338	18479	5912
7656	6113	12912	3018
5321	5153	8167	4382
4613	4744	6883	2077
5058	3931	6177	9167
3360	3852	1698	8270
9728	9508	15824	7066
8637	2027	8798	5960
5737	23916	8467	5944
4028	14791	5348	3736
3998	9889	24286	12482
8577	7864	12775	5996
8730	14046	19025	4253
6021	5384	2303	15928
6345	2328	24289	11918
5743	25075	19368	4035
11377	23462	15113	8610
8583	18671	11258	3147
7629	6335	7184	2684
4034	21824	4570	2647
3493	18253	12647	11688
11777	12969	11098	8256
10149	11168	7631	1933
9501	9832	2285	1679
6941	9498	2328	8833
4677	6382	8891	9043
16497	2573	3254	7747
11066	9560	2440	2712
10890	4435	2129	7185
8381	1644	16279	5306
6342	7479	15342	4124
5913	3972	10334	7848
5230	3595	3900	7703
5015	7409	2701	4641
10242	5911	12851	2413
6003	1201	7667	7972
5163	12133	3557	6384
4292	12697	11579	3491
1812	9409	7627	3054
11653	8156	4897	1952
10827	5220	33446	12833
6878	3915	12912	12528
5730	11745	10557	6161
3616	7783	33964	4383
3675	18698	10085	3480
18957	3930	9992	15695
15522	2889	7909	5486
7970	16550	6096	4003
7068	1094	3986	4616
5359	21311	3662	7404
9367	13601	22122	5355
8296	2843	17275	3455
8385	23762	9270	3137
6345	14628	9609	2414
6326	19049	8686	2250
10826	5674	7416	1682
10264	17187	6763	10302
9936	5932	5551	9069
9413	1925	18144	7306
8262	11254	15456	4792
7065	9097	13263	2513
5605	12358	9673	1877
5332	9008	8639	8906
4571	10675	7035	8850
16648	8915	4172	8771
11426	4196	21403	8280
10527	7773	11443	6978
4612	6312	6974	4290
18068	5299	3777	3900
8400	4065	11256	8532
5824	1841	5477	6415
5572	18136	29702	5305
3828	15293	7828	8617
10754	11545	20442	2765
8910	10819	13178	2178
9222	6939	2862	2365
7299	6052	14978	13396
11173	3733	12556	1163
7109	15995	9418	12406
7450	11250	8816	3572
6308	11328	5438	2735
6188	10337	33136	11662
6131	2555	29668	11750
5028	5174	32220	13428
8896	3772	11485	8618
8657	2755	5827	9188
8192	31122	4942	4698
6402	20911	2266	3409
4957	15429	18153	8517
3657	8719	8296	3800
11071	5425	5956	3721
6798	4677	1776	4591
6270	1639	21192	4633
2397	13127	21841	4668
2342	9586	20180	2194
10119	5031	14267	15818
9027	3272	12719	9086
9188	9602	11693	4451
8425	19590	11421	923
7652	4439	8805	9468
4679	2357	6954	6204
4461	12125	5727	2731
1893	8247	3205	11152
11860	17736	3445	5019
9496	16526	3397	4360
7104	2388	3285	2493
5344	22341	18798	2203
4512	3695	14974	12009
4622	4342	21520	9643
2699	3878	2575	6185
10866	2250	20280	4622
10035	6678	8977	3957
9068	4648	8498	3706
7075	3516	1889	7094
5283	7531	31806	6426
14645	5752	19943	6318
7498	1206	11338	4856
7108	20754	9545	1217
6839	1437	7541	9605
6349	1212	17990	5298
4682	13200	5318	16769
3613	22266	37659	15229
2917	20123	30499	12662
2196	7566	13001	2106
12907	7111	21579	8194
9754	5969	9249	7222
7392	4754	8034	4155
6948	2953	7903	2004
4906	9714	6160	6532
3766	1794	21869	3626
14391	20202	8585	3198
13871	8411	7815	3380
7967	2793	2406	5417
5963	19244	7538	4945
5805	6618	5521	2585
20333	20023	11101	12478
10512	11441	10876	7172
6531	2098	6783	6074
6624	14132	7212	6008
6239	10591	3852	4141
6761	7783	27539	2402
17025	6745	17087	10543
11568	5930	7142	7439
11977	7978	1914	2591
8781	1177	2765	12336
6821	13554	2191	7967
6079	13477	11590	6151
5630	2208	12237	2814
5311	5853	9598	7822
2450	6026	14746	6798
9275	12634	9117	15425
8017	6492	6738	8282
7514	5041	6481	8482
5654	14459	6486	6245
5241	9086	4637	3366
4481	17746	17164	7497
3079	13385	10855	5583
13691	15298	6875	3124
10692	8664	1362	2779
6964	2225	26409	2435
5587	13974	18248	7317
5707	10640	16872	4658
5094	8561	9114	2950
8876	4141	8837	6358
6729	2110	7321	4183
5548	13362	6917	2106
9473	9495	5515	5970
8142	1184	5116	4335
7440	18071	3685	3702
6848	13671	12100	3521
5457	12887	10202	9523
5184	7524	7035	8867
4500	5995	7276	7972
13020	8785	6861	5571
9847	6268	7116	2792
9688	3915	4818	4712
8121	8246	25300	4057
6572	5171	3494	3667
5793	2919	9925	2772
4397	10503	8299	11871
17766	5633	4949	8046
7067	4046	12906	7931
6710	3611	10488	4645
5461	11412	9956	8641
5057	10664	8914	9376
5096	8594	8108	2657
4376	9667	7537	12820
4985	6345	4976	6882
2642	5133	3093	5344
10988	3924	28106	2278
8944	19203	19144	13589
8379	2977	5589	3220
6780	2693	11069	5348
6043	23685	10528	1636
3420	16980	10930	6796
2849	6944	5380	1899
12198	2189	2321	12311
9399	7283	20935	6377
8623	4332	17802	4082
7088	2568	12885	5784
3711	14384	14797	4076
2482	10114	12594	2314
15514	5847	7644	9959
15739	3829	2094	5970
11378	3350	7318	3334
8453	19800	3551	5887
6528	18516	2921	3892
6433	8501	15422	3580
5081	6441	14126	3458
2363	6186	11704	3356
19076	4118	19593	19837
10241	3352	16073	11577
6948	3248	8175	10473
3430	2868	14542	5415
2089	8101	6600	11797
1845	4594	19761	9904
15466	4004	14516	9277
12970	3054	6933	7645
10787	6146	1648	6993
9204	2779	19589	3833
6463	9886	14374	1935
4317	4910	2584	8355
4432	2741	14837	7808
9288	9861	11340	7110
8953	3858	9888	19268
7574	5491	5238	8726
6300	3542	30278	6461
6304	2906	6922	4388
4564	18710	15599	4048
12845	12560	12114	2471
10959	7574	9042	10114
9003	3931	11719	7576
6932	11873	9261	7407
7115	3551	4835	3577
5026	2520	4871	3126
15962	7635	19911	2068
8755	3319	3654	1498
8931	2821	23622	1242
6193	21793	18011	7890
6369	9305	10227	4891
5976	7804	7500	11207
3324	10406	7355	6350
14268	12763	2293	3498
8210	12352	15743	19774
7138	7461	8993	9091
5619	7042	15397	6885
4080	11280	12156	4418
12299	20110	11282	7424
9723	19464	6345	7567
8748	10961	24060	8175
9453	5922	17229	6266
6079	2180	4084	2852
4524	25181	19353	12405
2664	10345	13058	8999
9541	9765	7838	9035
6451	12931	9024	6970
5664	13121	7580	6624
4482	10408	6909	4070
10847	1540	5453	3245
6532	11830	2302	1570
6287	6572	14434	12836
6149	6552	15220	8498
6084	3985	14982	5833
4527	12833	4788	5365
12439	14371	2520	4804
9980	5487	16469	4208
5471	10035	1031	11801
8077	5765	18268	8026
6594	1793	16608	4156
6561	1186	15985	15343
5236	9957	10904	10077
4804	10315	8011	6697
10904	5301	7815	11777
7977	28919	5479	8237
6650	6328	4850	6098
5315	11319	23046	5461
3494	12483	15417	4085
2731	10644	12269	4495
13900	6967	13395	3246
11182	4879	6829	16806
7999	4048	13419	7028
7438	2914	8442	5332
4890	1692	4401	2417
4035	9446	9617	1109
3984	8764	8293	10398
11855	6999	6419	3968
8415	4954	5836	2326
8459	3077	5225	2149
8623	13278	4286	15549
5997	11995	2716	3650
4962	9776	22470	3179
25050	10393	20070	9624
16353	8964	10714	5674
10453	5578	9993	3516
8302	7350	6635	3736
5996	6541	5495	7764
4952	4670	14922	3219
3384	18903	11784	3240
15221	6278	10711	15781
12090	6020	10716	7641
10825	2522	27392	5235
10203	14695	13176	2146
8643	8362	19242	14671
7954	2396	18014	12213
7541	13967	15660	9361
2249	9421	8862	8135
19462	6281	11958	8262
11290	9686	11514	7493
9990	6222	10870	6608
8808	2948	16394	2254
7661	9229	16146	9719
6698	7445	14349	6401
4297	4447	12540	4496
12442	2852	7888	3779
12110	12371	3487	3914
10627	12088	16610	2667
6211	13821	11463	2266
3448	1843	9227	15124
13787	14393	8639	7507
7533	7819	6639	5572
4646	23935	4857	5372
1898	3783	16799	3556
14890	3220	14566	1745
11205	4860	5539	1731
3990	2302	3044	14797
3564	6276	2508	9883
1976	4202	2106	6909
7987	3499	21667	12193
7836	18114	9337	8248
7247	1039	5093	6560
6536	7171	17243	3204
6429	6237	16238	5024
6612	2161	14599	4680
3684	6047	13851	2602
10053	4163	12605	4266
9584	2251	5850	3659
5976	1670	19499	3025
4253	6197	9359	10764
4365	1709	8196	6192
2362	1131	4977	4886
12497	14662	34284	3361
11529	14134	21403	2381
11882	10246	6362	2284
12394	1644	4824	19073
9364	6804	9636	14524
9186	1118	4093	4821
5348	9692	19877	13655
2708	9113	15729	7960
7347	6689	4272	13538
6999	9968	14204	8391
6623	7173	9715	8224
6441	7803	15138	3670
4828	12449	9884	2379
4934	4903	7929	11679
14407	9026	5094	6612
12601	6059	4198	5992
7613	3288	33064	5891
3318	1505	8530	4809
12358	5897	7431	9363
12739	5247	21829	4463
7474	18515	14370	3303
5980	15888	3876	1851
2852	4659	26803	11764
8942	8524	14575	9256
7784	7339	9186	8875
7585	3315	20024	8739
7675	2886	16225	7513
4603	13812	11201	7166
4194	10921	10435	6924
18994	5893	9473	2544
10267	17405	9181	12592
6425	13783	7204	11056
3196	22234	6026	8680
3452	2095	22179	3698
11226	9148	8466	11381
8007	4475	6349	5997
5464	3853	4979	2977
3466	14141	21805	10407
18729	3112	13846	9963
10130	5895	12120	10414
8027	5314	11708	2081
7606	4209	4322	7722
7044	2458	4996	5829
4800	2345	2989	12010
9689	18478	10666	9928
8298	15109	11150	6865
7849	9411	10806	4200
7175	9566	1960	2481
7359	8987	17987	20532
5658	5753	19085	8582
2800	4860	14393	5571
10942	3709	14988	5399
9345	2283	9292	4273
8989	12552	8014	9101
7955	7467	6540	4817
7824	10303	2383	3994
6751	4748	21203	3326
3138	6893	6065	13297
12712	6533	5412	10848
10760	5463	15847	5492
6486	2573	10544	3068
6415	18584	4123	2845
5522	15345	3141	10565
16473	12530	3239	7009
16739	12930	25548	4665
11183	11840	2573	3049
6471	7461	9112	1514
5993	1410	8834	10614
4171	17567	14240	9669
4485	16029	14159	10713
4027	2253	11492	10266
3169	9581	6028	7883
15928	4408	2131	6416
12555	3619	13130	2687
9179	3609	8586	2573
8155	2767	6554	1441
6734	2650	5808	13073
2827	4183	15500	13573
7918	19279	11712	11913
7018	9586	17892	11492
6673	3309	13968	3076
6312	2611	12029	7779
5572	10041	2982	7346
2026	9292	22879	3225
10634	9660	23730	4504
7050	2418	6070	9189
6607	9867	13290	5764
5584	6206	5490	4224
5608	4180	5063	3613
5124	7005	6199	2993
8625	4525	5205	5774
8879	3312	6686	5175
7853	3512	3755	4220
5709	3148	3575	8518
4844	2459	17704	8746
18447	19486	14835	5404
11095	3722	4755	4531
9367	14527	3192	12433
5824	1742	20689	6261
11144	6166	11335	5745
6295	6272	8190	4366
6127	4155	7035	3602
5154	7560	7292	3294
4403	1380	25411	8979
3620	8940	14449	8154
3449	2642	10487	7336
2682	2407	4071	7056
2405	16521	7280	10572
10192	9820	2848	8667
8025	4201	18970	5436
7894	1747	9301	7021
7093	1338	8958	5361
5605	7579	6224	14993
4923	5855	4126	13233
2363	11605	21203	11121
2175	15805	12413	10293
15930	5301	6431	8307
13919	5033	16925	16826
12464	3619	7406	6447
8268	2513	18101	5827
6934	19222	15305	3628
5127	17053	10668	13990
1830	1579	10592	14604
14043	15304	9405	2685
12976	11726	6944	6901
10388	4108	6708	4209
9685	4191	11426	3107
8864	3005	5204	2867
7620	15093	3827	2785
7087	7985	2477	11306
6003	3866	16040	7754
2510	9712	12667	3723
13192	2683	12288	3458
10924	2432	6678	12988
9002	8444	3534	4565
8625	3701	28135	9007
7808	3457	20200	6038
4041	16715	10751	2126
10721	10310	3489	9211
7092	9793	29850	4675
6019	4272	13690	4132
5251	16552	3550	13743
4765	8896	30840	10082
4364	8644	19845	8294
2648	5853	16669	4703
15802	3396	15222	4033
4432	3332	5175	3730
3338	2754	3117	3219
3039	18640	12307	2994
11994	4045	9901	6202
10991	4482	7294	7277
9330	3493	5408	2013
8148	8330	4689	17723
7481	2825	11302	16995
5859	1589	10184	11252
5242	7298	7098	10147
5726	4546	3174	12824
5290	3667	12129	10422
16796	3411	11779	7364
14984	18554	9139	7072
9606	10264	8421	5267
5339	4840	7703	2568
18229	3227	3951	2214
7379	16184	17234	9290
6401	18459	15606	4345
6493	5057	13044	3398
8331	9895	9117	10044
6154	6450	9236	4047
6120	5615	6194	10464
4358	7221	6704	10034
3975	2446	2712	9849
4225	13162	27392	6346
3048	11630	17270	9120
11914	7725	9729	7123
9406	4445	7604	5074
7672	14415	8580	3088
4944	9295	2473	1891
4408	5863	16997	14729
2816	2253	10397	7016
12207	2023	10629	7153
10979	7580	9142	4459
9855	6662	7575	10131
4643	5416	13874	6685
4556	4536	7414	3956
15296	1910	5745	3661
13430	18008	15117	3346
9249	12718	13801	12872
6503	6109	9333	9801
6373	3981	2734	8760
4174	6688	14157	12571
23206	6261	9161	12861
12613	3720	9741	11349
6947	1828	6412	6929
4501	9485	16726	4464
4153	7583	13829	4123
3684	7188	6792	16693
[truncated: 1,973 more rows]
