# Supplementary figures and images for: Dissecting the phase separation and oligomerization activities of the carboxysome positioning protein McdB
Source: eLife journal article supplement (doi:10.7554/elife.81362), 2023-09-05

**A**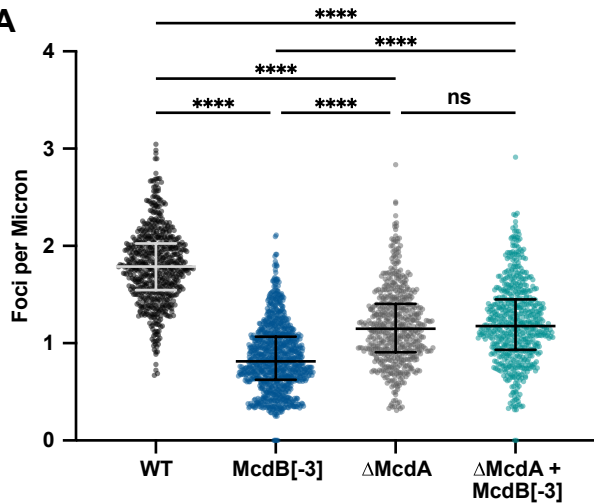**B**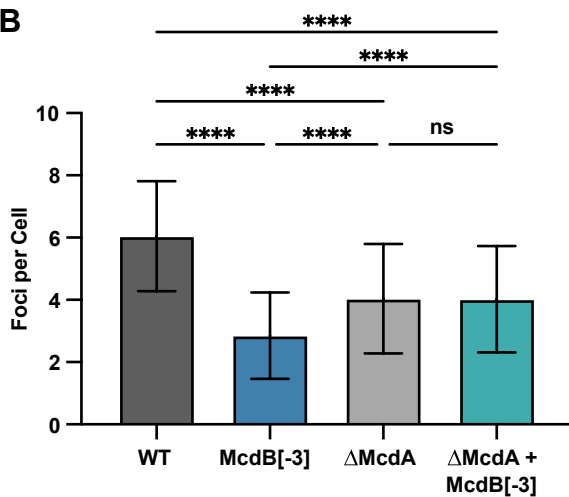

Supplement: supp [file elife-81362-supp-v1.zip]

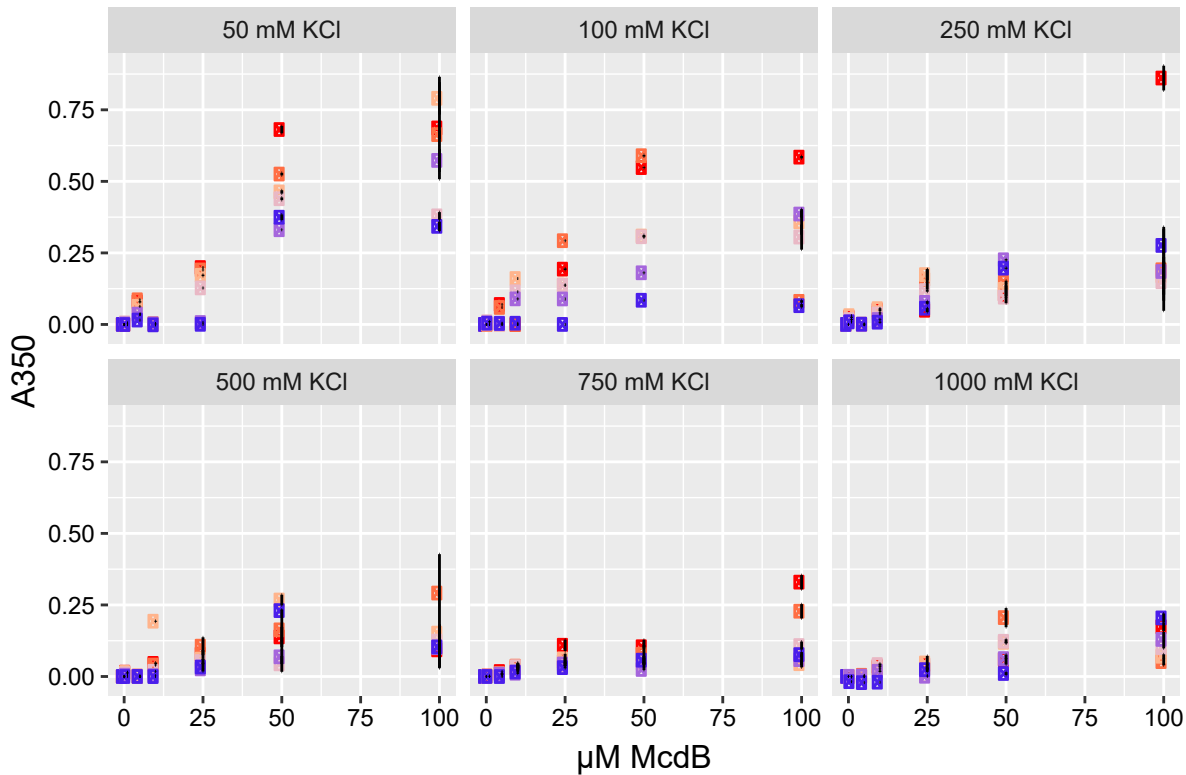

Supplement: supp [file elife-81362-supp-v1.zip]

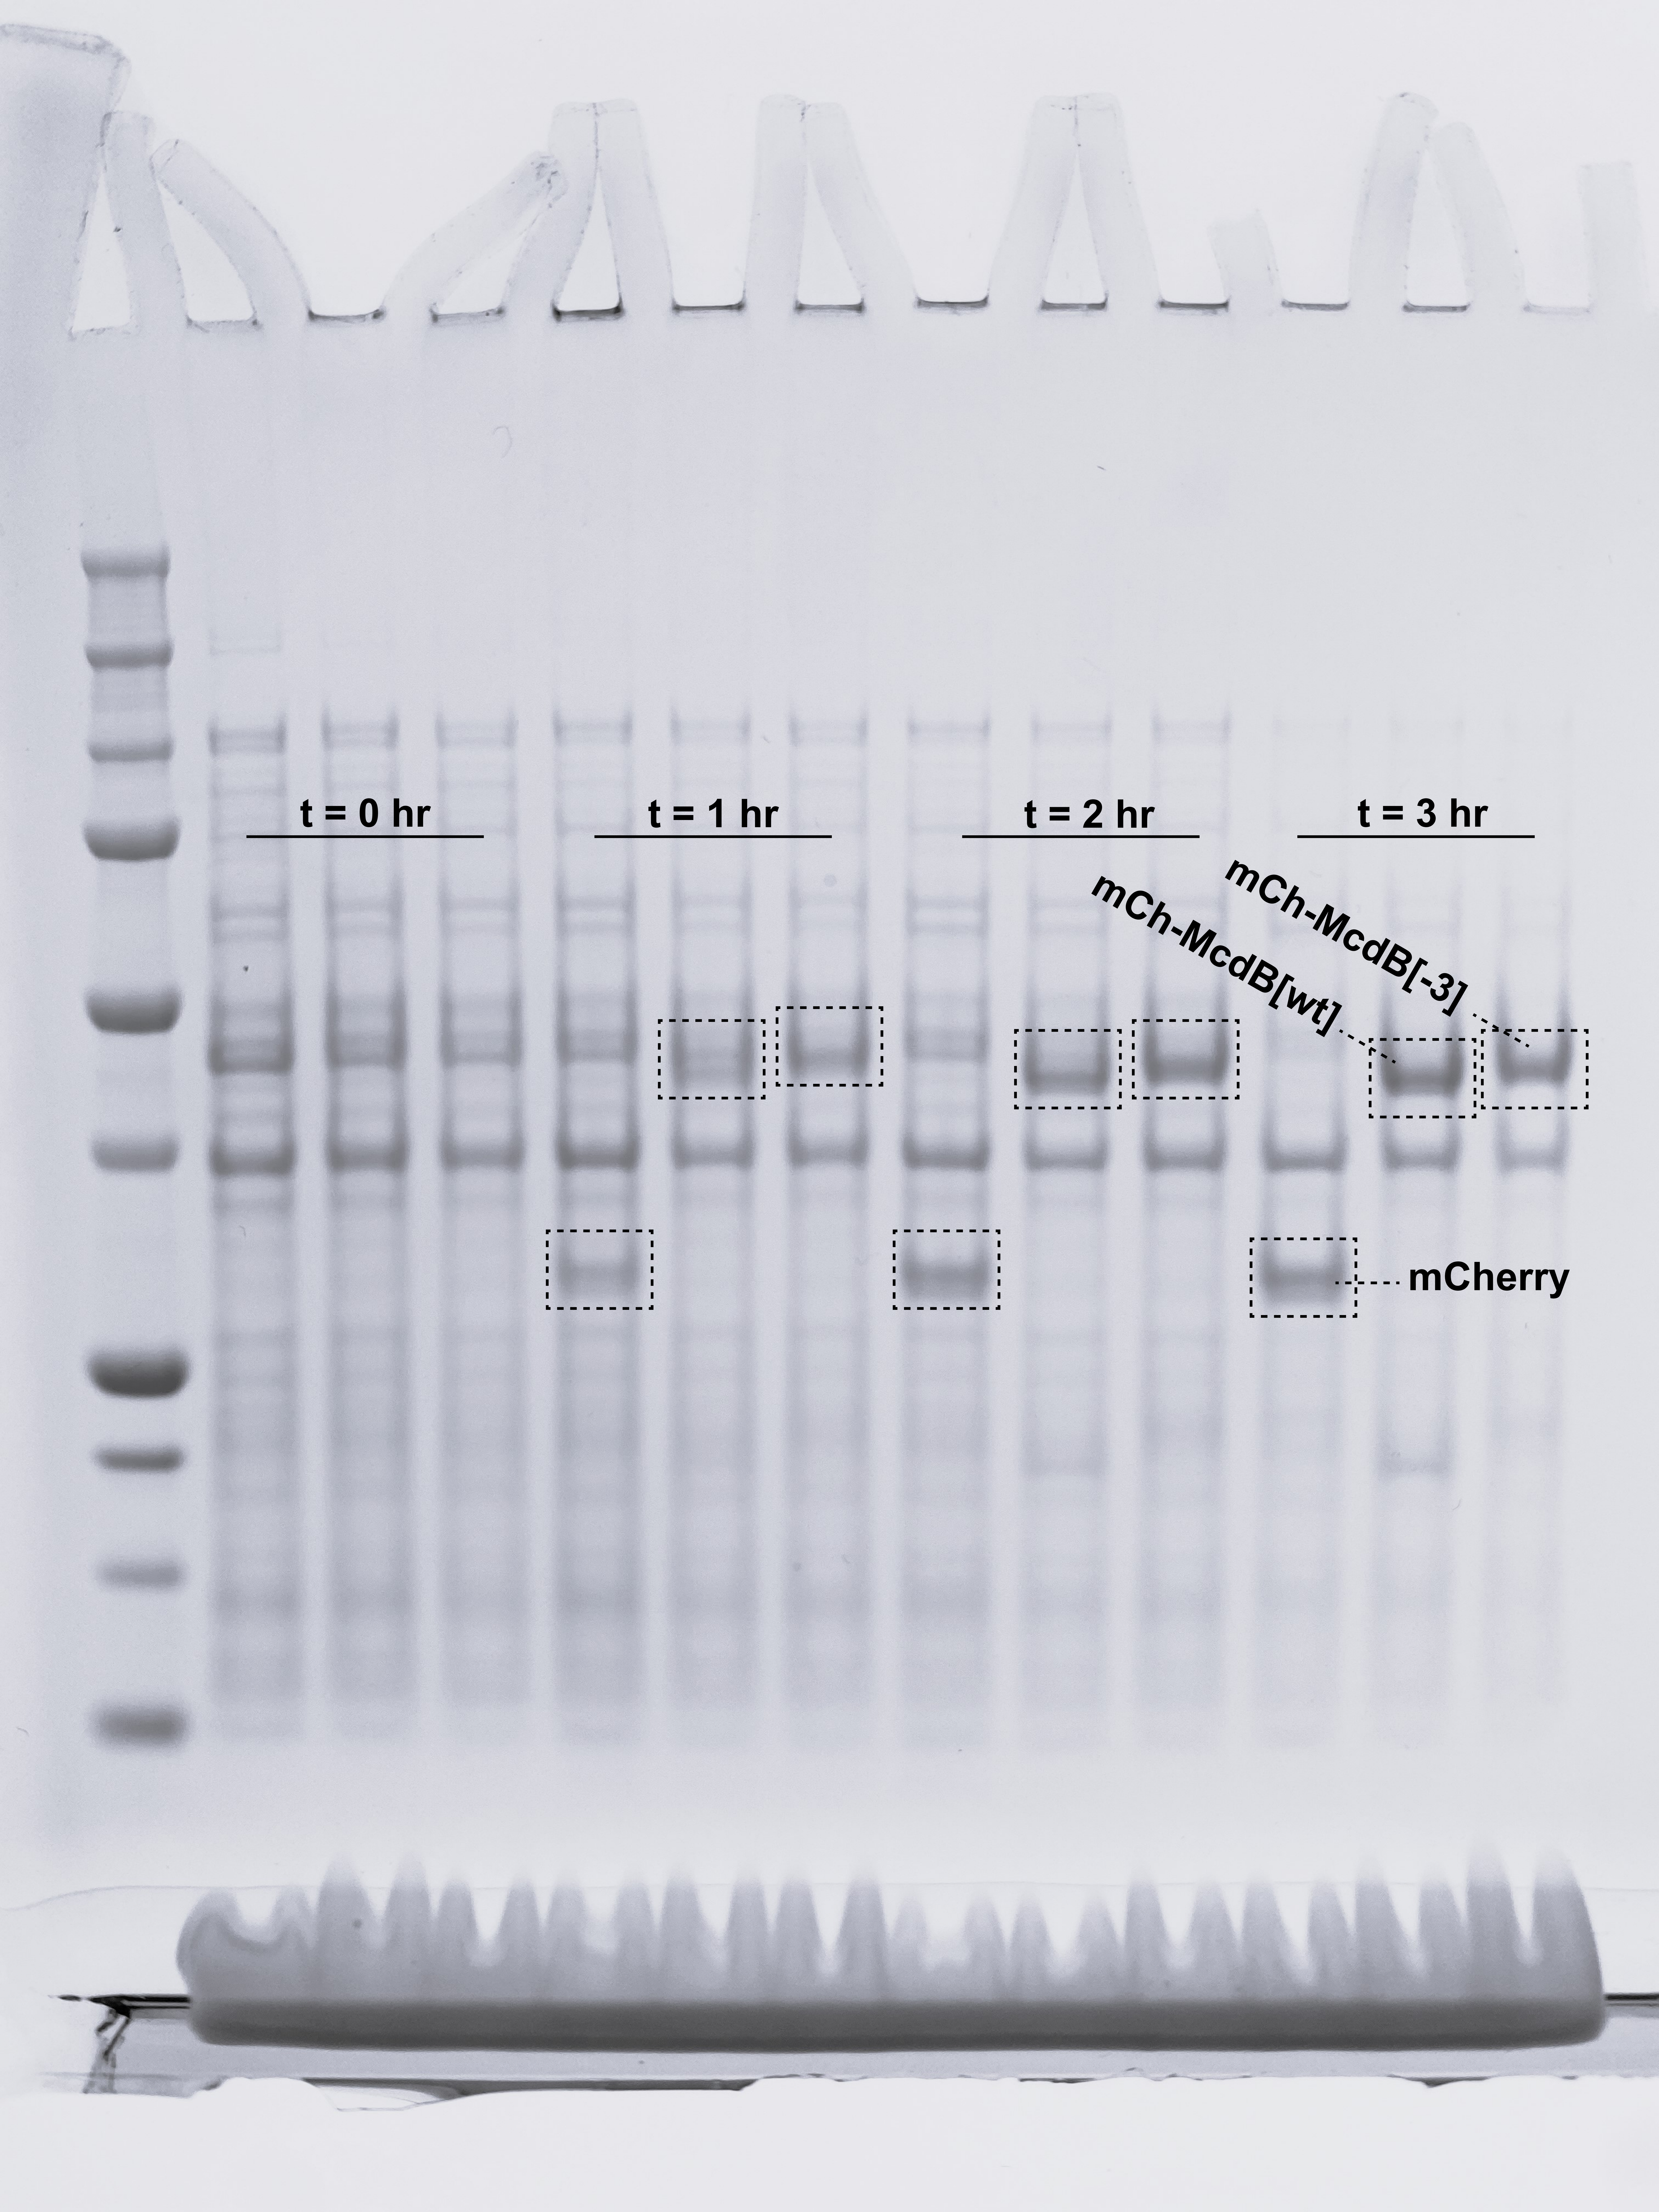

Supplement: supp [file elife-81362-supp-v1.zip]

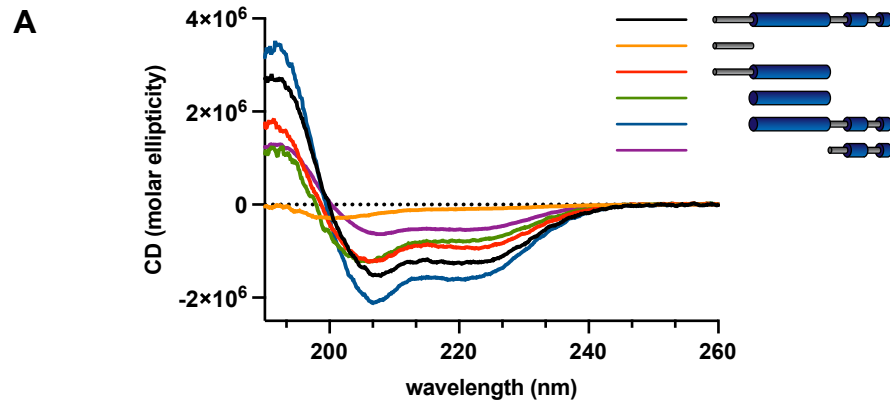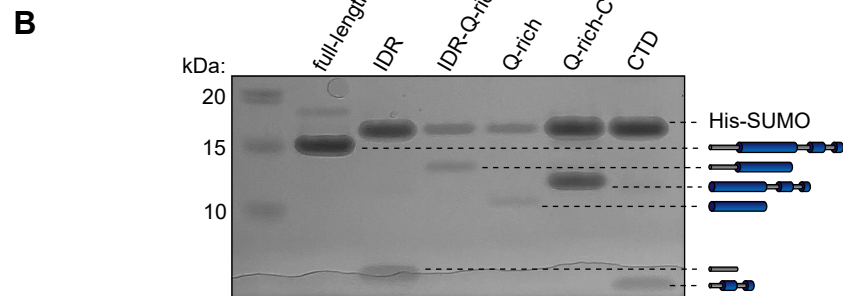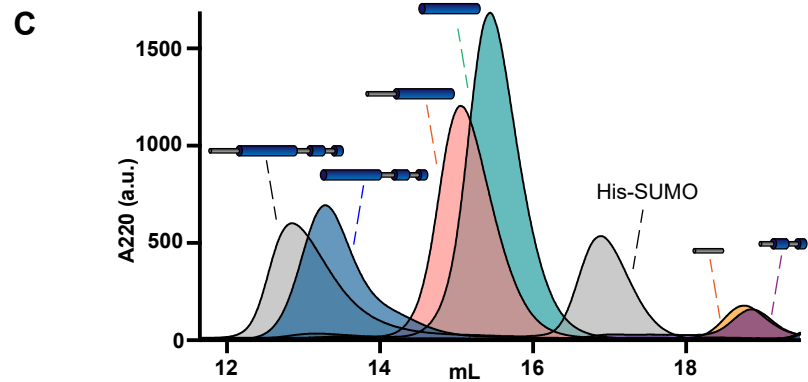

Supplement: supp [file elife-81362-supp-v1.zip]

**A****10%  
PEG-8000**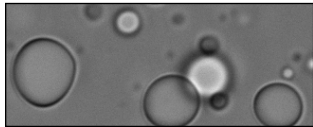**B****0 s**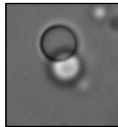**5 s**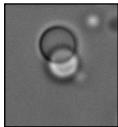**10 s**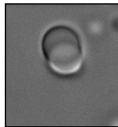**15 s**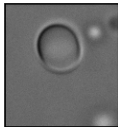**20 s**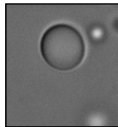**30 s**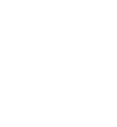**60 s**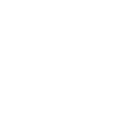**90 s****5%  
Ficoll-400**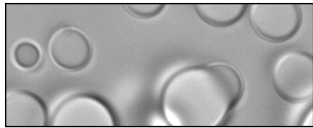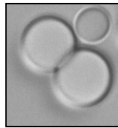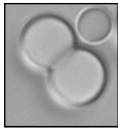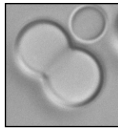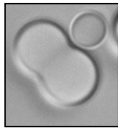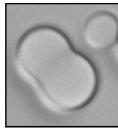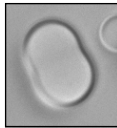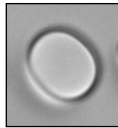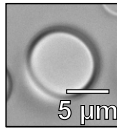

Supplement: supp [file elife-81362-supp-v1.zip]

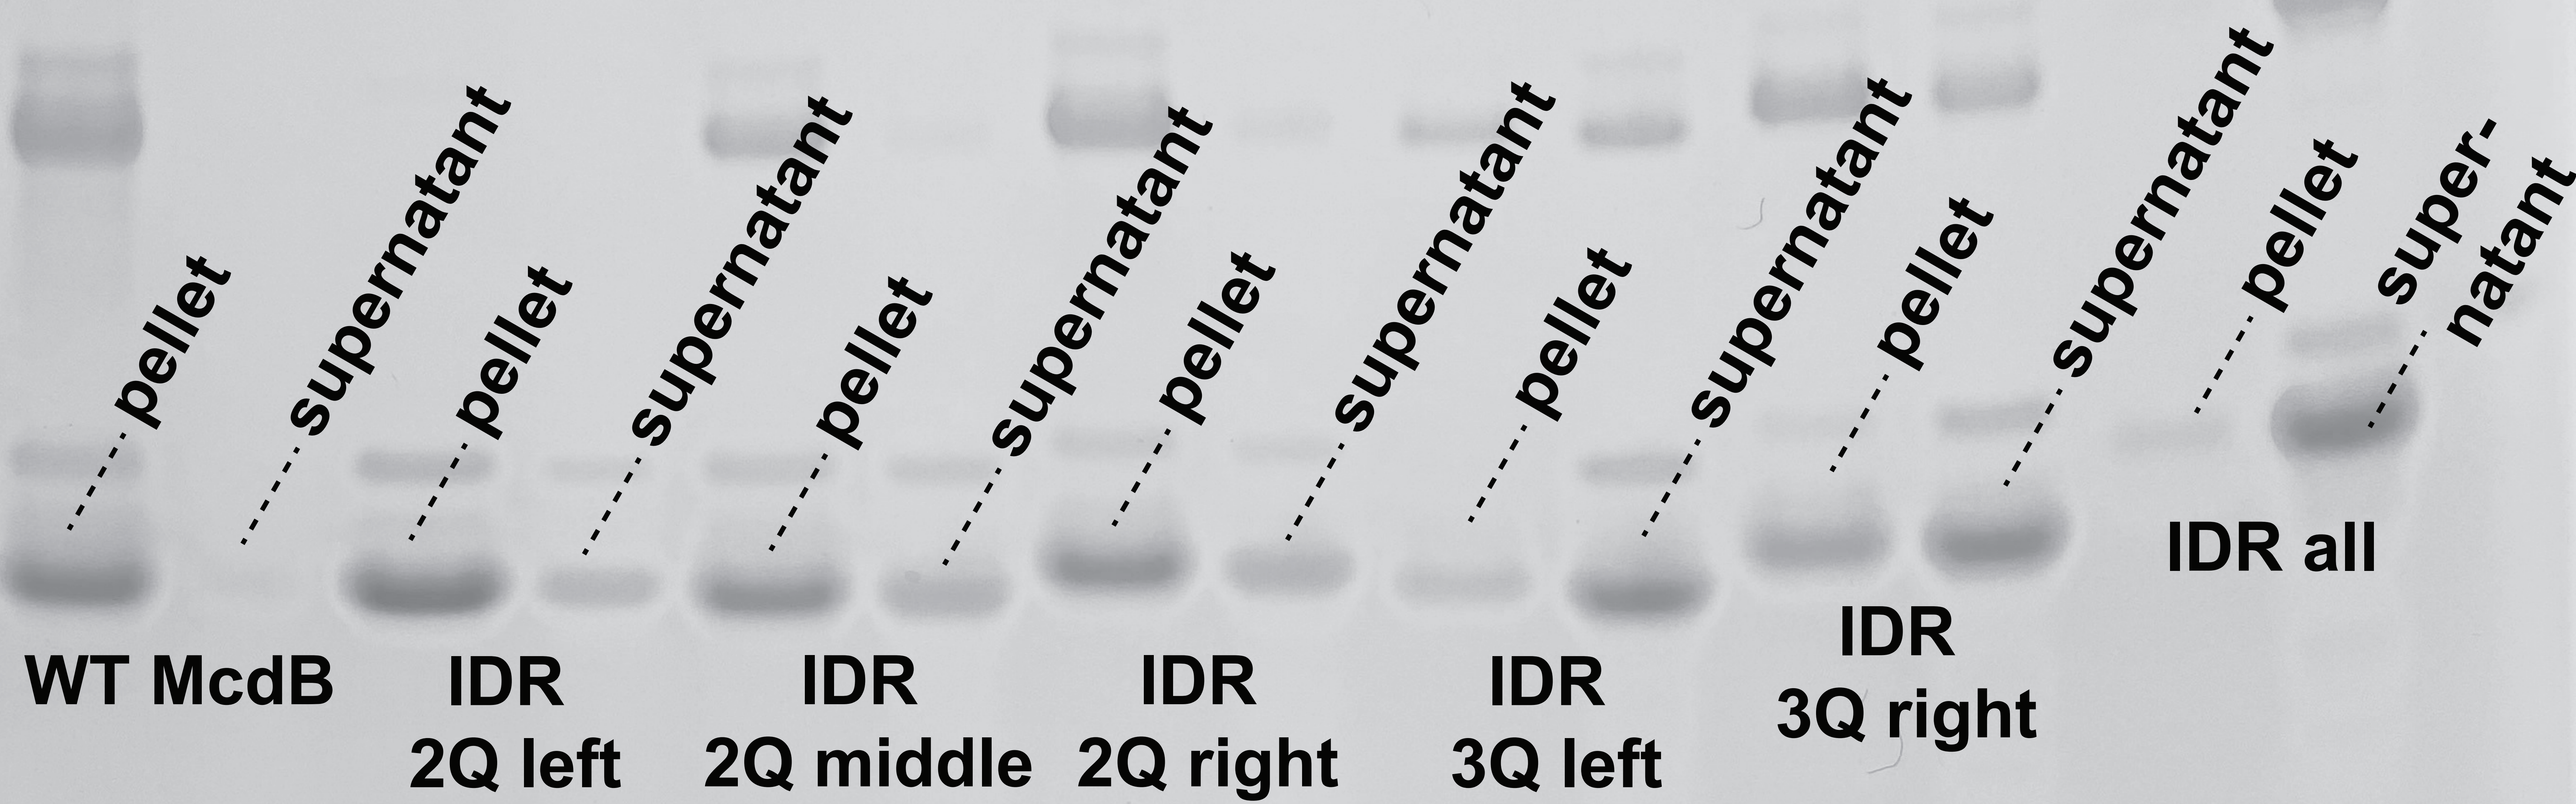

IDR all

Supplement: supp [file elife-81362-supp-v1.zip]

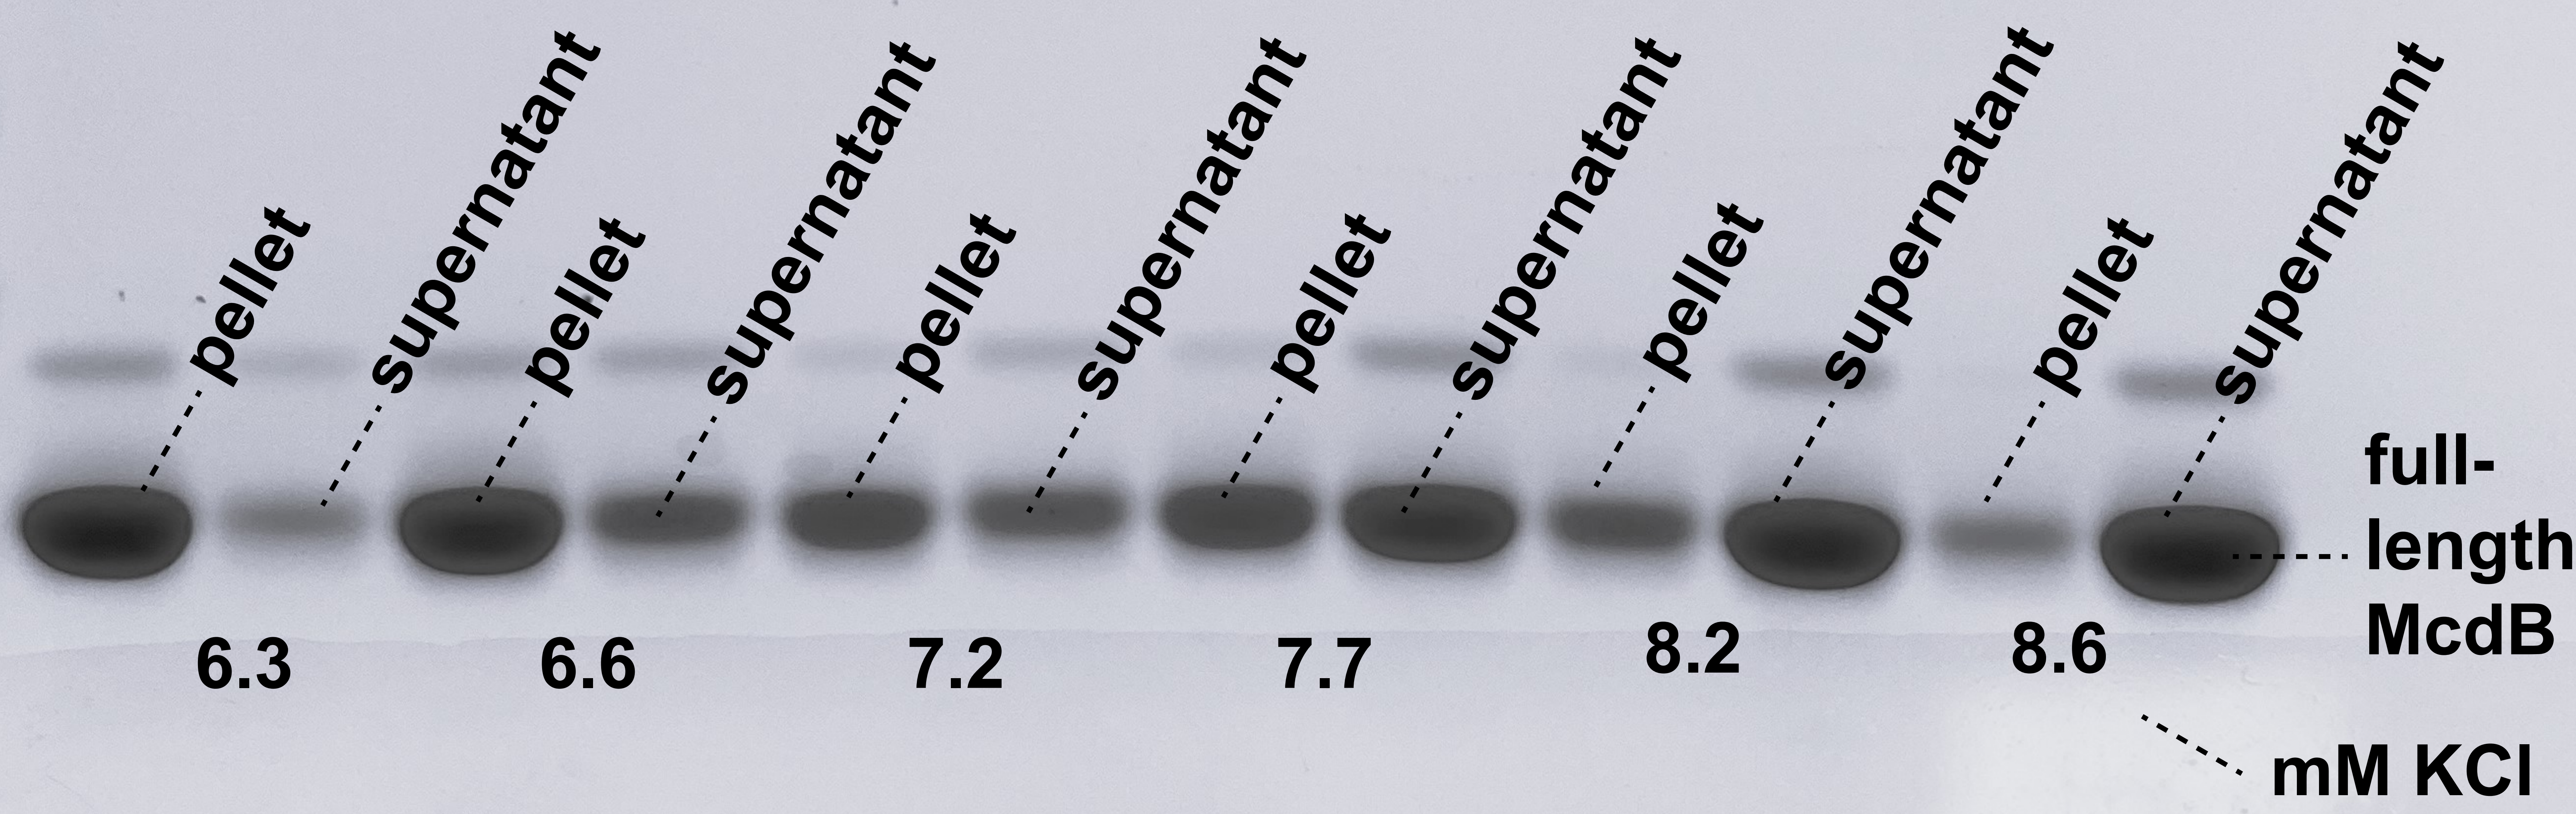

Supplement: supp [file elife-81362-supp-v1.zip]

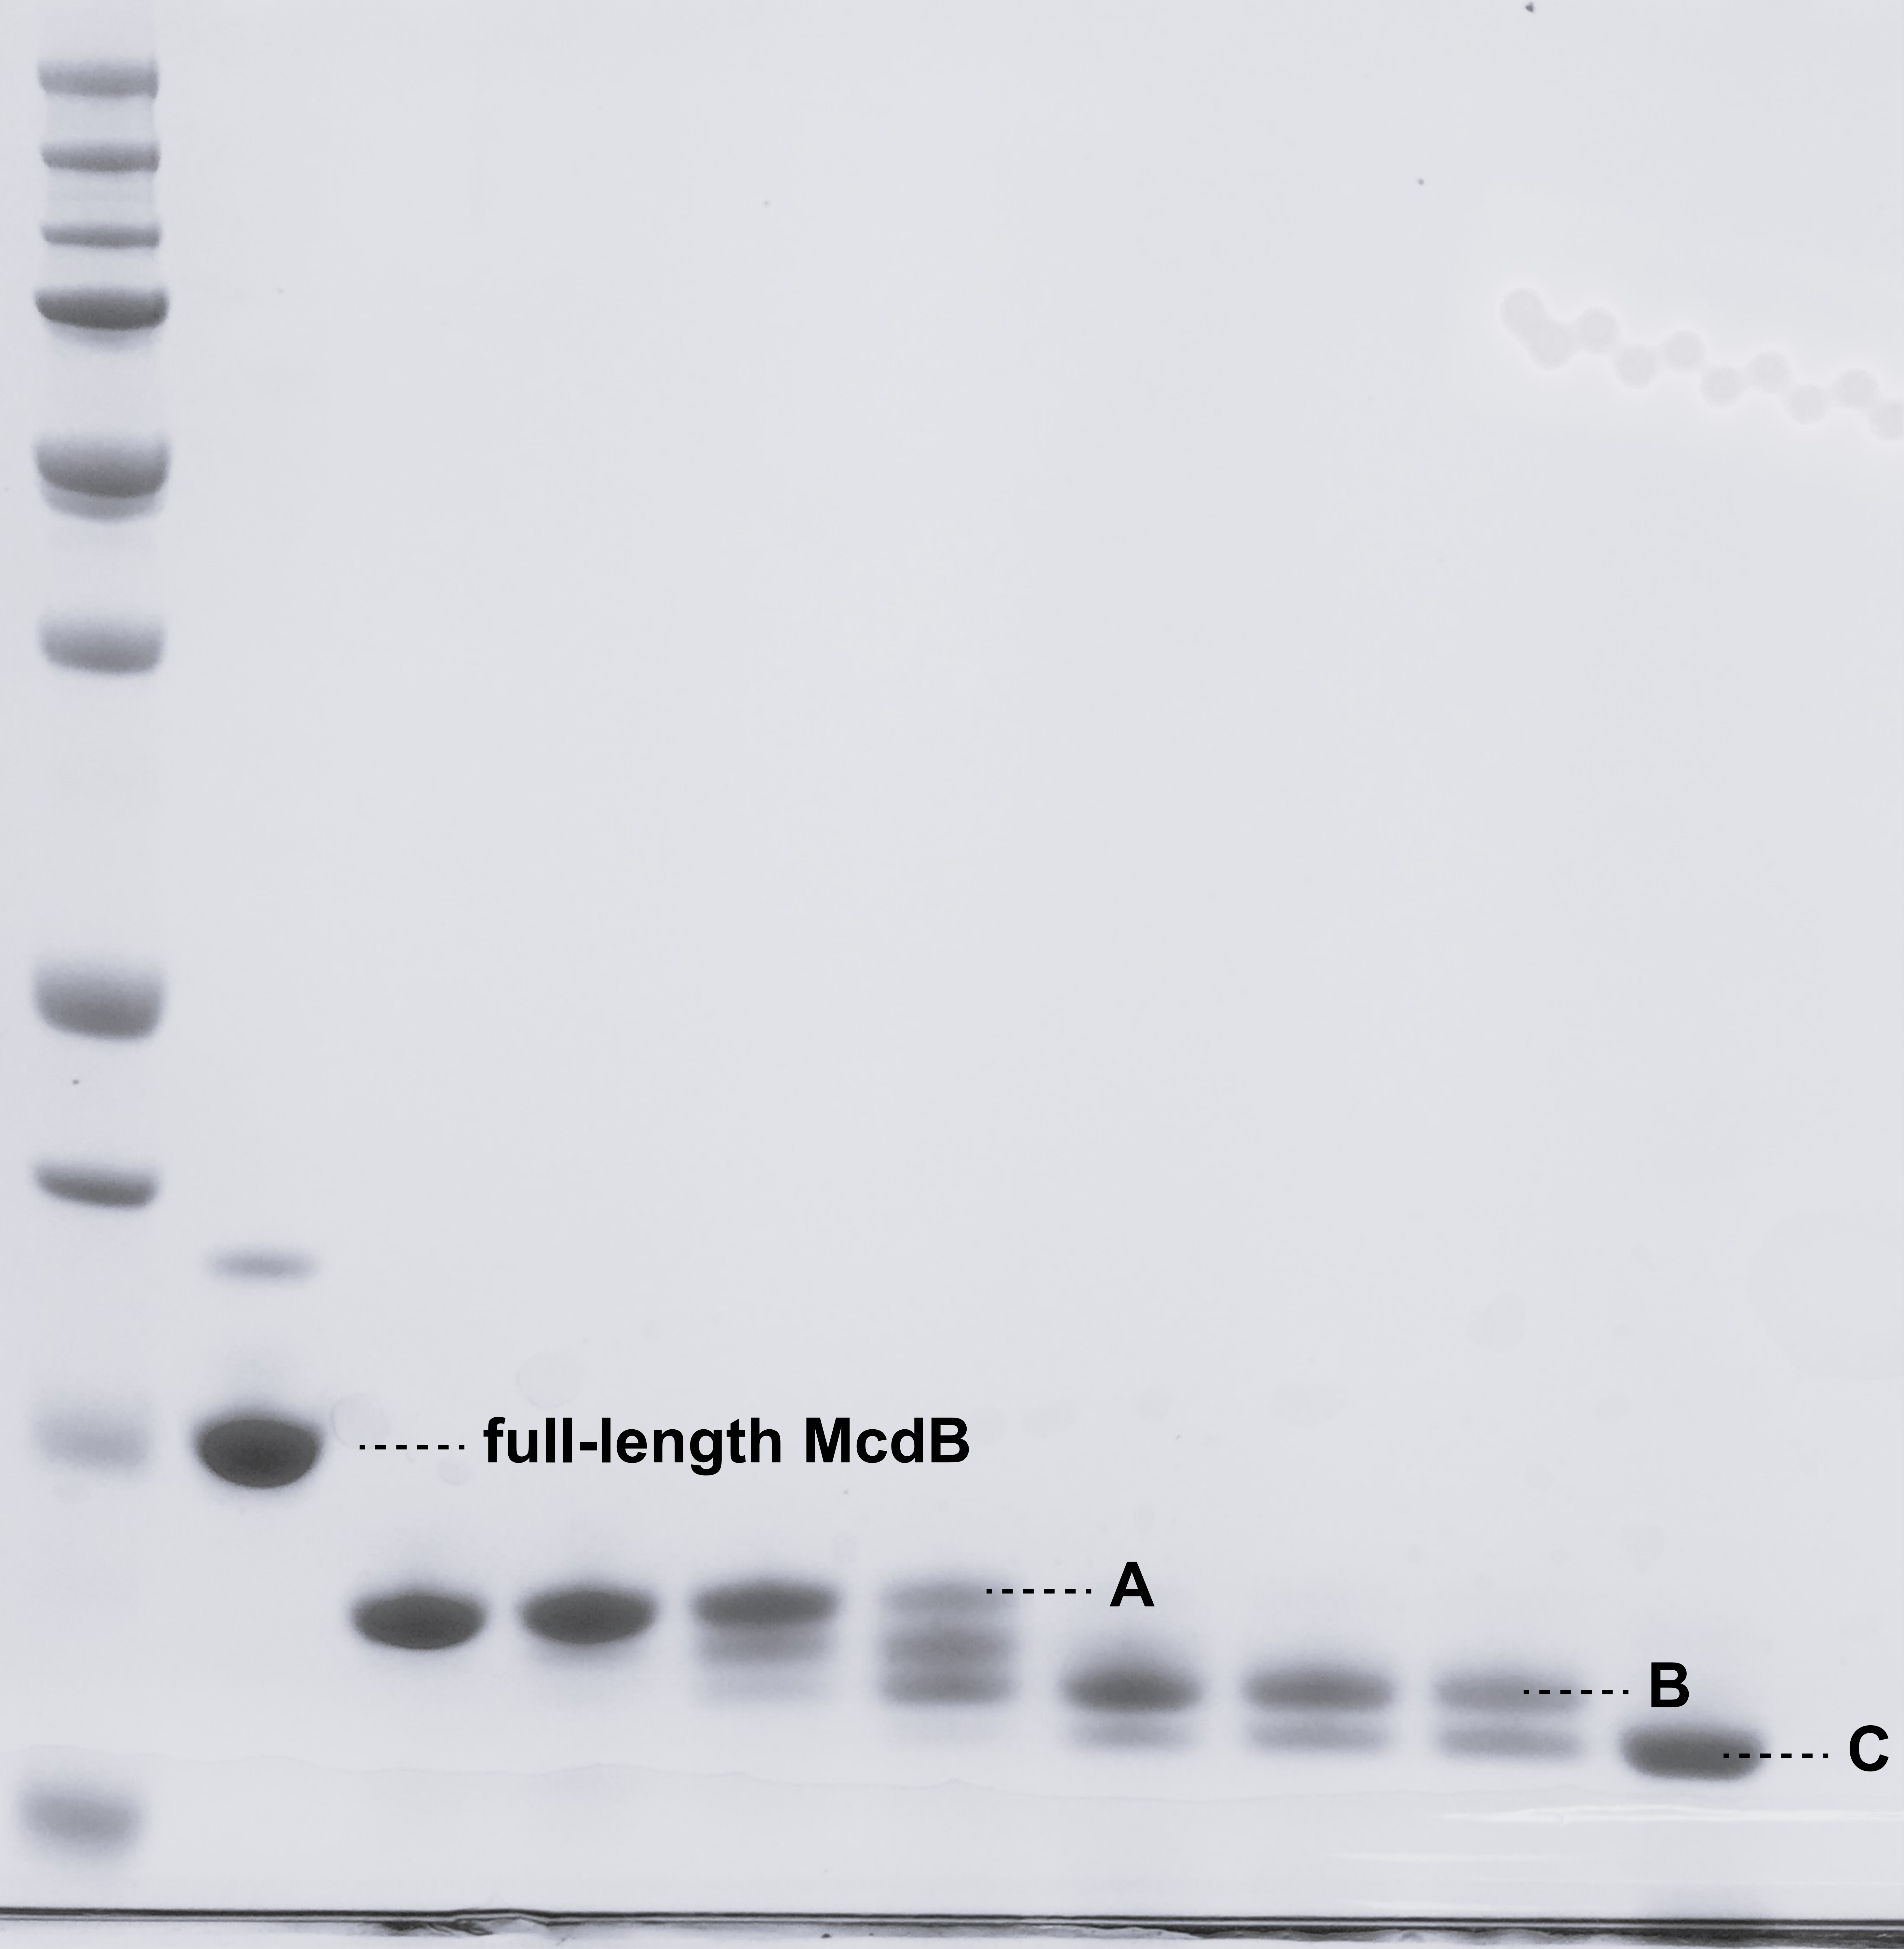

Supplement: supp [file elife-81362-supp-v1.zip]
